# Supplementary material for: Genome-wide CRISPRi-seq identified ferredoxin-NADP reductase FprB as a synergistic target for gallium therapy in Pseudomonas aeruginosa
Source: bioRxiv preprint, doi:10.1101/2024.09.01.610675, version 1 (2024-09-01)
Supplement: Supplementary Table S3 [file 610675_file04.xlsx]

## Sheet: Sheet1
Name	Sequence (5’-3’)
gblock4-ccdB-CSY	ccattctacagtttattcttgacattgcactgtccccctggtataataactatagttcactgccgtataggcagctaagaaatgagaccgacgagaacaggggctggtgaaatgcagtttaaggtttacacctataaaagagagagccgttatcgtctgtttgtggatgtacagagtgatattattgacacgcccgggcgacggatggtgatccccctggccagtgcacgtctgctgtcagataaagtctcccgtgaactttacccggtggtgcatatcggggatgaaagctggcgcatgatgaccaccgatatggccagtgtgccggtttccgttatcggggaagaagtggctgatctcagccaccgcgaaaatgacatcaaaaacgccattaacctg…
gblock 6-TetPt5	aaaaaattagcgcaagaagacaaaaatcaccttgcgctaatgctctgttacagtggagctcgcgaaaaaaccccgccgaagcggggttttttgcgtaattttcctcctatttagatccttaggagccggattcgcatttcagctgcttctcgaggccgcagatgatgagctcgaggccgaagaggaaggccggctccgcgccctgatgatcgaagagctcgatcgcttggcggaggagcgggggcatggaatccgtggtcggcgtttcgcgttcctctttggcgacctgatgctcttggtcctccagcacgcagcccagggtgaaatgccccacggcggagagcgcatacagcgcattttcgaggctgaacccctgttggcagaggaacgccagttggt…
