# Supplementary material for: Genome-wide CRISPRi-seq identified ferredoxin-NADP reductase FprB as a synergistic target for gallium therapy in Pseudomonas aeruginosa
Source: bioRxiv preprint, doi:10.1101/2024.09.01.610675, version 1 (2024-09-01)
Supplement: Supplementary Table S4 [file 610675_file05.xlsx]

## Sheet: PA14 CRISPRi library set 1
PA14 CRISPRi library set 1
all_targets	all_ranges	5832-targeted	General barcode-left	Strain specific barcode left	BsaI or BsmBI + 1 nt	overhang-left	sgRNA_seq	overhang-right	1 nt + BsaI or BsmBI	Strain specific barcode right	General barcode-right
PA14_00010	490..509	yes	TATGAGGACGAATCTCCCGCTTATA	TAGTTGGTGGGTTTCCCTACCGTGT	GGTCTCG	tata	GCACTGCTGCCAAAGTTCCA	gttt	tgagacc	GGTACAGTAAGTGAGAATCCTCTCT	GGTCTTGACAAACGTGTGCTTGTAC
PA14_00020	2069..2088	yes	TATGAGGACGAATCTCCCGCTTATA	TAGTTGGTGGGTTTCCCTACCGTGT	GGTCTCG	tata	CAACAGGGCTTCGCGTTGAA	gttt	tgagacc	GGTACAGTAAGTGAGAATCCTCTCT	GGTCTTGACAAACGTGTGCTTGTAC
PA14_00030	3176..3195	yes	TATGAGGACGAATCTCCCGCTTATA	TAGTTGGTGGGTTTCCCTACCGTGT	GGTCTCG	tata	GGTGACCGAAACGCGGGTCA	gttt	tgagacc	GGTACAGTAAGTGAGAATCCTCTCT	GGTCTTGACAAACGTGTGCTTGTAC
PA14_00050	4306..4325	yes	TATGAGGACGAATCTCCCGCTTATA	TAGTTGGTGGGTTTCCCTACCGTGT	GGTCTCG	tata	CCCCTTCAGCACCTTGATGC	gttt	tgagacc	GGTACAGTAAGTGAGAATCCTCTCT	GGTCTTGACAAACGTGTGCTTGTAC
PA14_00060	7753..7772	yes	TATGAGGACGAATCTCCCGCTTATA	TAGTTGGTGGGTTTCCCTACCGTGT	GGTCTCG	tata	GTAAAAGAGGACGGTTCTGA	gttt	tgagacc	GGTACAGTAAGTGAGAATCCTCTCT	GGTCTTGACAAACGTGTGCTTGTAC
PA14_00070	8313..8332	yes	TATGAGGACGAATCTCCCGCTTATA	TAGTTGGTGGGTTTCCCTACCGTGT	GGTCTCG	tata	GTCGAGAATCAGCAGGGAAC	gttt	tgagacc	GGTACAGTAAGTGAGAATCCTCTCT	GGTCTTGACAAACGTGTGCTTGTAC
PA14_00080	8682..8701	yes	TATGAGGACGAATCTCCCGCTTATA	TAGTTGGTGGGTTTCCCTACCGTGT	GGTCTCG	tata	AAAGGTGCAGTGTCTTTTTC	gttt	tgagacc	GGTACAGTAAGTGAGAATCCTCTCT	GGTCTTGACAAACGTGTGCTTGTAC
PA14_00090	12459..12478	yes	TATGAGGACGAATCTCCCGCTTATA	TAGTTGGTGGGTTTCCCTACCGTGT	GGTCTCG	tata	CAGTTCGACCAGGAAATCCT	gttt	tgagacc	GGTACAGTAAGTGAGAATCCTCTCT	GGTCTTGACAAACGTGTGCTTGTAC
PA14_00100	13408..13427	yes	TATGAGGACGAATCTCCCGCTTATA	TAGTTGGTGGGTTTCCCTACCGTGT	GGTCTCG	tata	TGCGCACGGCGGGCGTAGTC	gttt	tgagacc	GGTACAGTAAGTGAGAATCCTCTCT	GGTCTTGACAAACGTGTGCTTGTAC
PA14_00110	13546..13565	yes	TATGAGGACGAATCTCCCGCTTATA	TAGTTGGTGGGTTTCCCTACCGTGT	GGTCTCG	tata	TCGTTGCACCAGAAGCAGCG	gttt	tgagacc	GGTACAGTAAGTGAGAATCCTCTCT	GGTCTTGACAAACGTGTGCTTGTAC
PA14_00120	14258..14277	no	TATGAGGACGAATCTCCCGCTTATA	TAGTTGGTGGGTTTCCCTACCGTGT	GGTCTCG	tata	GCGTAGGGCCCCCACCACCA	gttt	tgagacc	GGTACAGTAAGTGAGAATCCTCTCT	GGTCTTGACAAACGTGTGCTTGTAC
PA14_00130	15231..15250	yes	TATGAGGACGAATCTCCCGCTTATA	TAGTTGGTGGGTTTCCCTACCGTGT	GGTCTCG	tata	GGCACTTGAGCGGGGTTCGT	gttt	tgagacc	GGTACAGTAAGTGAGAATCCTCTCT	GGTCTTGACAAACGTGTGCTTGTAC
PA14_00140	15639..15658	yes	TATGAGGACGAATCTCCCGCTTATA	TAGTTGGTGGGTTTCCCTACCGTGT	GGTCTCG	tata	AGGGTGCCGCGCCAGGCCGC	gttt	tgagacc	GGTACAGTAAGTGAGAATCCTCTCT	GGTCTTGACAAACGTGTGCTTGTAC
PA14_00150	16563..16582	yes	TATGAGGACGAATCTCCCGCTTATA	TAGTTGGTGGGTTTCCCTACCGTGT	GGTCTCG	tata	ATGGGTATTCGACATAGGAC	gttt	tgagacc	GGTACAGTAAGTGAGAATCCTCTCT	GGTCTTGACAAACGTGTGCTTGTAC
PA14_00160	17187..17206	yes	TATGAGGACGAATCTCCCGCTTATA	TAGTTGGTGGGTTTCCCTACCGTGT	GGTCTCG	tata	CAGCGCATTGTCCACGCCTT	gttt	tgagacc	GGTACAGTAAGTGAGAATCCTCTCT	GGTCTTGACAAACGTGTGCTTGTAC
PA14_00170	18726..18745	yes	TATGAGGACGAATCTCCCGCTTATA	TAGTTGGTGGGTTTCCCTACCGTGT	GGTCTCG	tata	CGCCGACCTGGCCGGCACCT	gttt	tgagacc	GGTACAGTAAGTGAGAATCCTCTCT	GGTCTTGACAAACGTGTGCTTGTAC
PA14_00180	20066..20085	yes	TATGAGGACGAATCTCCCGCTTATA	TAGTTGGTGGGTTTCCCTACCGTGT	GGTCTCG	tata	CCTGGCAGGCGGCGAGACGC	gttt	tgagacc	GGTACAGTAAGTGAGAATCCTCTCT	GGTCTTGACAAACGTGTGCTTGTAC
PA14_00190	21007..21026	yes	TATGAGGACGAATCTCCCGCTTATA	TAGTTGGTGGGTTTCCCTACCGTGT	GGTCTCG	tata	CGAAGACGATGCGCAATGCT	gttt	tgagacc	GGTACAGTAAGTGAGAATCCTCTCT	GGTCTTGACAAACGTGTGCTTGTAC
PA14_00200	21568..21587	yes	TATGAGGACGAATCTCCCGCTTATA	TAGTTGGTGGGTTTCCCTACCGTGT	GGTCTCG	tata	GAATTCGAGAATGTTCAGGA	gttt	tgagacc	GGTACAGTAAGTGAGAATCCTCTCT	GGTCTTGACAAACGTGTGCTTGTAC
PA14_00210	21755..21774	yes	TATGAGGACGAATCTCCCGCTTATA	TAGTTGGTGGGTTTCCCTACCGTGT	GGTCTCG	tata	GCTCGCGGCAAGGAGCAGAA	gttt	tgagacc	GGTACAGTAAGTGAGAATCCTCTCT	GGTCTTGACAAACGTGTGCTTGTAC
PA14_00230	22904..22923	yes	TATGAGGACGAATCTCCCGCTTATA	TAGTTGGTGGGTTTCCCTACCGTGT	GGTCTCG	tata	CTTCCAGTTCGGCTGGAGAA	gttt	tgagacc	GGTACAGTAAGTGAGAATCCTCTCT	GGTCTTGACAAACGTGTGCTTGTAC
PA14_00240	24053..24072	yes	TATGAGGACGAATCTCCCGCTTATA	TAGTTGGTGGGTTTCCCTACCGTGT	GGTCTCG	tata	GCCCTCGCGGACGACCCGGG	gttt	tgagacc	GGTACAGTAAGTGAGAATCCTCTCT	GGTCTTGACAAACGTGTGCTTGTAC
PA14_00250	25540..25559	yes	TATGAGGACGAATCTCCCGCTTATA	TAGTTGGTGGGTTTCCCTACCGTGT	GGTCTCG	tata	GGCAGCGAACTGGATGCGCT	gttt	tgagacc	GGTACAGTAAGTGAGAATCCTCTCT	GGTCTTGACAAACGTGTGCTTGTAC
PA14_00280	25764..25783	yes	TATGAGGACGAATCTCCCGCTTATA	TAGTTGGTGGGTTTCCCTACCGTGT	GGTCTCG	tata	TTTGACAGCGGCGATACGGT	gttt	tgagacc	GGTACAGTAAGTGAGAATCCTCTCT	GGTCTTGACAAACGTGTGCTTGTAC
PA14_00290	26740..26759	yes	TATGAGGACGAATCTCCCGCTTATA	TAGTTGGTGGGTTTCCCTACCGTGT	GGTCTCG	tata	GGTTGCCGAATACGCAGTAG	gttt	tgagacc	GGTACAGTAAGTGAGAATCCTCTCT	GGTCTTGACAAACGTGTGCTTGTAC
PA14_00300	27695..27714	no	TATGAGGACGAATCTCCCGCTTATA	TAGTTGGTGGGTTTCCCTACCGTGT	GGTCTCG	tata	GATGGCGCAGATGCAGAGAC	gttt	tgagacc	GGTACAGTAAGTGAGAATCCTCTCT	GGTCTTGACAAACGTGTGCTTGTAC
PA14_00310	28657..28676	yes	TATGAGGACGAATCTCCCGCTTATA	TAGTTGGTGGGTTTCCCTACCGTGT	GGTCTCG	tata	CGCGACGCCAGCCCCGAGCG	gttt	tgagacc	GGTACAGTAAGTGAGAATCCTCTCT	GGTCTTGACAAACGTGTGCTTGTAC
PA14_00320	29942..29961	yes	TATGAGGACGAATCTCCCGCTTATA	TAGTTGGTGGGTTTCCCTACCGTGT	GGTCTCG	tata	CGCCAGCCCGCTGCAGCCGA	gttt	tgagacc	GGTACAGTAAGTGAGAATCCTCTCT	GGTCTTGACAAACGTGTGCTTGTAC
PA14_00340	32036..32055	yes	TATGAGGACGAATCTCCCGCTTATA	TAGTTGGTGGGTTTCCCTACCGTGT	GGTCTCG	tata	CCCGGTAGCCAGGCGAGGAA	gttt	tgagacc	GGTACAGTAAGTGAGAATCCTCTCT	GGTCTTGACAAACGTGTGCTTGTAC
PA14_00360	32977..32996	yes	TATGAGGACGAATCTCCCGCTTATA	TAGTTGGTGGGTTTCCCTACCGTGT	GGTCTCG	tata	CCAGCAGGCAGGTGGGAAGC	gttt	tgagacc	GGTACAGTAAGTGAGAATCCTCTCT	GGTCTTGACAAACGTGTGCTTGTAC
PA14_00380	34503..34522	yes	TATGAGGACGAATCTCCCGCTTATA	TAGTTGGTGGGTTTCCCTACCGTGT	GGTCTCG	tata	GATGAACAGGATGTTCGGCG	gttt	tgagacc	GGTACAGTAAGTGAGAATCCTCTCT	GGTCTTGACAAACGTGTGCTTGTAC
PA14_00400	34659..34678	yes	TATGAGGACGAATCTCCCGCTTATA	TAGTTGGTGGGTTTCCCTACCGTGT	GGTCTCG	tata	GGTCGAGGGATGGCGGCATG	gttt	tgagacc	GGTACAGTAAGTGAGAATCCTCTCT	GGTCTTGACAAACGTGTGCTTGTAC
PA14_00410	35586..35605	yes	TATGAGGACGAATCTCCCGCTTATA	TAGTTGGTGGGTTTCCCTACCGTGT	GGTCTCG	tata	GAAGCCCTGGATGCGGGGGG	gttt	tgagacc	GGTACAGTAAGTGAGAATCCTCTCT	GGTCTTGACAAACGTGTGCTTGTAC
PA14_00420	36250..36269	yes	TATGAGGACGAATCTCCCGCTTATA	TAGTTGGTGGGTTTCCCTACCGTGT	GGTCTCG	tata	GGCGCGGTCGCCCAGGGCGG	gttt	tgagacc	GGTACAGTAAGTGAGAATCCTCTCT	GGTCTTGACAAACGTGTGCTTGTAC
PA14_00430	36870..36889	yes	TATGAGGACGAATCTCCCGCTTATA	TAGTTGGTGGGTTTCCCTACCGTGT	GGTCTCG	tata	CGCACGGCCAGGCGGATAGC	gttt	tgagacc	GGTACAGTAAGTGAGAATCCTCTCT	GGTCTTGACAAACGTGTGCTTGTAC
PA14_00440	37887..37906	yes	TATGAGGACGAATCTCCCGCTTATA	TAGTTGGTGGGTTTCCCTACCGTGT	GGTCTCG	tata	GGGCGAAGCGGGTCTGCAGG	gttt	tgagacc	GGTACAGTAAGTGAGAATCCTCTCT	GGTCTTGACAAACGTGTGCTTGTAC
PA14_00450	39090..39109	yes	TATGAGGACGAATCTCCCGCTTATA	TAGTTGGTGGGTTTCCCTACCGTGT	GGTCTCG	tata	GGCGTCGGGGCCGTTGCGAT	gttt	tgagacc	GGTACAGTAAGTGAGAATCCTCTCT	GGTCTTGACAAACGTGTGCTTGTAC
PA14_00460	39231..39250	yes	TATGAGGACGAATCTCCCGCTTATA	TAGTTGGTGGGTTTCCCTACCGTGT	GGTCTCG	tata	CATTCAGGGAGGGCAGGTCG	gttt	tgagacc	GGTACAGTAAGTGAGAATCCTCTCT	GGTCTTGACAAACGTGTGCTTGTAC
PA14_00470	40218..40237	yes	TATGAGGACGAATCTCCCGCTTATA	TAGTTGGTGGGTTTCCCTACCGTGT	GGTCTCG	tata	CTTCTTGTAGGTGTGGTGAT	gttt	tgagacc	GGTACAGTAAGTGAGAATCCTCTCT	GGTCTTGACAAACGTGTGCTTGTAC
PA14_00480	40645..40664	yes	TATGAGGACGAATCTCCCGCTTATA	TAGTTGGTGGGTTTCCCTACCGTGT	GGTCTCG	tata	CGCTGCCCGCCACGGCAAAC	gttt	tgagacc	GGTACAGTAAGTGAGAATCCTCTCT	GGTCTTGACAAACGTGTGCTTGTAC
PA14_00490	41144..41163	yes	TATGAGGACGAATCTCCCGCTTATA	TAGTTGGTGGGTTTCCCTACCGTGT	GGTCTCG	tata	GGAAGATAAAGGCCAGGCGA	gttt	tgagacc	GGTACAGTAAGTGAGAATCCTCTCT	GGTCTTGACAAACGTGTGCTTGTAC
PA14_00510	43892..43911	yes	TATGAGGACGAATCTCCCGCTTATA	TAGTTGGTGGGTTTCCCTACCGTGT	GGTCTCG	tata	TTCCTCCGCGCTGCGGATCT	gttt	tgagacc	GGTACAGTAAGTGAGAATCCTCTCT	GGTCTTGACAAACGTGTGCTTGTAC
PA14_00520	54585..54604	yes	TATGAGGACGAATCTCCCGCTTATA	TAGTTGGTGGGTTTCCCTACCGTGT	GGTCTCG	tata	CTTGCCGATTGTGTCCCCGC	gttt	tgagacc	GGTACAGTAAGTGAGAATCCTCTCT	GGTCTTGACAAACGTGTGCTTGTAC
PA14_00530	54915..54934	yes	TATGAGGACGAATCTCCCGCTTATA	TAGTTGGTGGGTTTCCCTACCGTGT	GGTCTCG	tata	GTGAGTCTCAGAGCCAGTAC	gttt	tgagacc	GGTACAGTAAGTGAGAATCCTCTCT	GGTCTTGACAAACGTGTGCTTGTAC
PA14_00550	56957..56976	yes	TATGAGGACGAATCTCCCGCTTATA	TAGTTGGTGGGTTTCCCTACCGTGT	GGTCTCG	tata	CGGGTTCTCCGCCCCGGTGT	gttt	tgagacc	GGTACAGTAAGTGAGAATCCTCTCT	GGTCTTGACAAACGTGTGCTTGTAC
PA14_00560	57177..57196	yes	TATGAGGACGAATCTCCCGCTTATA	TAGTTGGTGGGTTTCCCTACCGTGT	GGTCTCG	tata	TCAACTCAGCCACGAAAGAC	gttt	tgagacc	GGTACAGTAAGTGAGAATCCTCTCT	GGTCTTGACAAACGTGTGCTTGTAC
PA14_00570	59034..59053	yes	TATGAGGACGAATCTCCCGCTTATA	TAGTTGGTGGGTTTCCCTACCGTGT	GGTCTCG	tata	GAGCGGCAGTAGTGCTTTGT	gttt	tgagacc	GGTACAGTAAGTGAGAATCCTCTCT	GGTCTTGACAAACGTGTGCTTGTAC
PA14_00580	59790..59809	yes	TATGAGGACGAATCTCCCGCTTATA	TAGTTGGTGGGTTTCCCTACCGTGT	GGTCTCG	tata	CGTCTTCGGTCCGCTGCACC	gttt	tgagacc	GGTACAGTAAGTGAGAATCCTCTCT	GGTCTTGACAAACGTGTGCTTGTAC
PA14_00590	60254..60273	yes	TATGAGGACGAATCTCCCGCTTATA	TAGTTGGTGGGTTTCCCTACCGTGT	GGTCTCG	tata	GACCTGCGAGAGCATGCTGT	gttt	tgagacc	GGTACAGTAAGTGAGAATCCTCTCT	GGTCTTGACAAACGTGTGCTTGTAC
PA14_00600	61106..61125	yes	TATGAGGACGAATCTCCCGCTTATA	TAGTTGGTGGGTTTCCCTACCGTGT	GGTCTCG	tata	CGTTCTGCTGGCGTAGGCGT	gttt	tgagacc	GGTACAGTAAGTGAGAATCCTCTCT	GGTCTTGACAAACGTGTGCTTGTAC
PA14_00620	63059..63078	yes	TATGAGGACGAATCTCCCGCTTATA	TAGTTGGTGGGTTTCCCTACCGTGT	GGTCTCG	tata	GGAGTATCGGCTTGCGTGAC	gttt	tgagacc	GGTACAGTAAGTGAGAATCCTCTCT	GGTCTTGACAAACGTGTGCTTGTAC
PA14_00630	63785..63804	yes	TATGAGGACGAATCTCCCGCTTATA	TAGTTGGTGGGTTTCCCTACCGTGT	GGTCTCG	tata	CCCGCGCAGGGATCTTCCCC	gttt	tgagacc	GGTACAGTAAGTGAGAATCCTCTCT	GGTCTTGACAAACGTGTGCTTGTAC
PA14_00640	64735..64754	yes	TATGAGGACGAATCTCCCGCTTATA	TAGTTGGTGGGTTTCCCTACCGTGT	GGTCTCG	tata	CAAGGCGAGCGTATCGGTCA	gttt	tgagacc	GGTACAGTAAGTGAGAATCCTCTCT	GGTCTTGACAAACGTGTGCTTGTAC
PA14_00650	66951..66970	yes	TATGAGGACGAATCTCCCGCTTATA	TAGTTGGTGGGTTTCCCTACCGTGT	GGTCTCG	tata	CATGCACGTGGCTGGGGCGA	gttt	tgagacc	GGTACAGTAAGTGAGAATCCTCTCT	GGTCTTGACAAACGTGTGCTTGTAC
PA14_00660	67700..67719	yes	TATGAGGACGAATCTCCCGCTTATA	TAGTTGGTGGGTTTCCCTACCGTGT	GGTCTCG	tata	GAACTTGCTGGTGTCGTCGA	gttt	tgagacc	GGTACAGTAAGTGAGAATCCTCTCT	GGTCTTGACAAACGTGTGCTTGTAC
PA14_00670	68254..68273	yes	TATGAGGACGAATCTCCCGCTTATA	TAGTTGGTGGGTTTCCCTACCGTGT	GGTCTCG	tata	CGAAGCCTGGTAGATCGACA	gttt	tgagacc	GGTACAGTAAGTGAGAATCCTCTCT	GGTCTTGACAAACGTGTGCTTGTAC
PA14_00680	69239..69258	yes	TATGAGGACGAATCTCCCGCTTATA	TAGTTGGTGGGTTTCCCTACCGTGT	GGTCTCG	tata	AGACGCGGGTGGCGGTCAGG	gttt	tgagacc	GGTACAGTAAGTGAGAATCCTCTCT	GGTCTTGACAAACGTGTGCTTGTAC
PA14_00690	69385..69404	yes	TATGAGGACGAATCTCCCGCTTATA	TAGTTGGTGGGTTTCCCTACCGTGT	GGTCTCG	tata	ACAGGGAACGAAGCAATCCA	gttt	tgagacc	GGTACAGTAAGTGAGAATCCTCTCT	GGTCTTGACAAACGTGTGCTTGTAC
PA14_00700	70335..70354	yes	TATGAGGACGAATCTCCCGCTTATA	TAGTTGGTGGGTTTCCCTACCGTGT	GGTCTCG	tata	CGTAGAGGTAATGCAGGGTG	gttt	tgagacc	GGTACAGTAAGTGAGAATCCTCTCT	GGTCTTGACAAACGTGTGCTTGTAC
PA14_00710	71119..71138	yes	TATGAGGACGAATCTCCCGCTTATA	TAGTTGGTGGGTTTCCCTACCGTGT	GGTCTCG	tata	GACTCCTCCGGAGCTGTGGA	gttt	tgagacc	GGTACAGTAAGTGAGAATCCTCTCT	GGTCTTGACAAACGTGTGCTTGTAC
PA14_00720	71688..71707	yes	TATGAGGACGAATCTCCCGCTTATA	TAGTTGGTGGGTTTCCCTACCGTGT	GGTCTCG	tata	GGTGGCAATCCCCAGCCCGA	gttt	tgagacc	GGTACAGTAAGTGAGAATCCTCTCT	GGTCTTGACAAACGTGTGCTTGTAC
PA14_00730	72332..72351	yes	TATGAGGACGAATCTCCCGCTTATA	TAGTTGGTGGGTTTCCCTACCGTGT	GGTCTCG	tata	AGCGGGACGAGACGGGTGAG	gttt	tgagacc	GGTACAGTAAGTGAGAATCCTCTCT	GGTCTTGACAAACGTGTGCTTGTAC
PA14_00740	72792..72811	yes	TATGAGGACGAATCTCCCGCTTATA	TAGTTGGTGGGTTTCCCTACCGTGT	GGTCTCG	tata	GCTCAGGACGAGCAGGCCAC	gttt	tgagacc	GGTACAGTAAGTGAGAATCCTCTCT	GGTCTTGACAAACGTGTGCTTGTAC
PA14_00750	72951..72970	yes	TATGAGGACGAATCTCCCGCTTATA	TAGTTGGTGGGTTTCCCTACCGTGT	GGTCTCG	tata	GCGGAACATAGCACAGCACG	gttt	tgagacc	GGTACAGTAAGTGAGAATCCTCTCT	GGTCTTGACAAACGTGTGCTTGTAC
PA14_00760	75017..75036	yes	TATGAGGACGAATCTCCCGCTTATA	TAGTTGGTGGGTTTCCCTACCGTGT	GGTCTCG	tata	GGGGGTGGCGAAGGGATTGT	gttt	tgagacc	GGTACAGTAAGTGAGAATCCTCTCT	GGTCTTGACAAACGTGTGCTTGTAC
PA14_00770	75709..75728	yes	TATGAGGACGAATCTCCCGCTTATA	TAGTTGGTGGGTTTCCCTACCGTGT	GGTCTCG	tata	GATGTTCGGGTAGCGCAGCG	gttt	tgagacc	GGTACAGTAAGTGAGAATCCTCTCT	GGTCTTGACAAACGTGTGCTTGTAC
PA14_00780	76250..76269	yes	TATGAGGACGAATCTCCCGCTTATA	TAGTTGGTGGGTTTCCCTACCGTGT	GGTCTCG	tata	TTTGCCCTGGTAGGAACGAA	gttt	tgagacc	GGTACAGTAAGTGAGAATCCTCTCT	GGTCTTGACAAACGTGTGCTTGTAC
PA14_00790	76369..76388	yes	TATGAGGACGAATCTCCCGCTTATA	TAGTTGGTGGGTTTCCCTACCGTGT	GGTCTCG	tata	AGGTCGTAGGCCTGCAGAAG	gttt	tgagacc	GGTACAGTAAGTGAGAATCCTCTCT	GGTCTTGACAAACGTGTGCTTGTAC
PA14_00800	78404..78423	yes	TATGAGGACGAATCTCCCGCTTATA	TAGTTGGTGGGTTTCCCTACCGTGT	GGTCTCG	tata	AGCGCTTCCTGGTGATCGCC	gttt	tgagacc	GGTACAGTAAGTGAGAATCCTCTCT	GGTCTTGACAAACGTGTGCTTGTAC
PA14_00810	78772..78791	yes	TATGAGGACGAATCTCCCGCTTATA	TAGTTGGTGGGTTTCCCTACCGTGT	GGTCTCG	tata	CCGCGACCGCGCGGGGGCAG	gttt	tgagacc	GGTACAGTAAGTGAGAATCCTCTCT	GGTCTTGACAAACGTGTGCTTGTAC
PA14_00820	80936..80955	yes	TATGAGGACGAATCTCCCGCTTATA	TAGTTGGTGGGTTTCCCTACCGTGT	GGTCTCG	tata	TCAAACGGTTTTCGCTGGGT	gttt	tgagacc	GGTACAGTAAGTGAGAATCCTCTCT	GGTCTTGACAAACGTGTGCTTGTAC
PA14_00830	82702..82721	yes	TATGAGGACGAATCTCCCGCTTATA	TAGTTGGTGGGTTTCCCTACCGTGT	GGTCTCG	tata	GCCGAGGGCGAGCGGAAGAA	gttt	tgagacc	GGTACAGTAAGTGAGAATCCTCTCT	GGTCTTGACAAACGTGTGCTTGTAC
PA14_00850	83900..83919	yes	TATGAGGACGAATCTCCCGCTTATA	TAGTTGGTGGGTTTCCCTACCGTGT	GGTCTCG	tata	GGCCAGCGAGAGCAGCAGGC	gttt	tgagacc	GGTACAGTAAGTGAGAATCCTCTCT	GGTCTTGACAAACGTGTGCTTGTAC
PA14_00860	84615..84634	yes	TATGAGGACGAATCTCCCGCTTATA	TAGTTGGTGGGTTTCCCTACCGTGT	GGTCTCG	tata	GGCTGCGGGCGACCTCGTGC	gttt	tgagacc	GGTACAGTAAGTGAGAATCCTCTCT	GGTCTTGACAAACGTGTGCTTGTAC
PA14_00875	87706..87725	yes	TATGAGGACGAATCTCCCGCTTATA	TAGTTGGTGGGTTTCCCTACCGTGT	GGTCTCG	tata	TCGCGTTCGATGTCGAATCC	gttt	tgagacc	GGTACAGTAAGTGAGAATCCTCTCT	GGTCTTGACAAACGTGTGCTTGTAC
PA14_00890	88451..88470	yes	TATGAGGACGAATCTCCCGCTTATA	TAGTTGGTGGGTTTCCCTACCGTGT	GGTCTCG	tata	CTGTAGTAGCTGACTGAGTT	gttt	tgagacc	GGTACAGTAAGTGAGAATCCTCTCT	GGTCTTGACAAACGTGTGCTTGTAC
PA14_00900	89116..89135	yes	TATGAGGACGAATCTCCCGCTTATA	TAGTTGGTGGGTTTCCCTACCGTGT	GGTCTCG	tata	GCTGACGAAATCGCCGCGGC	gttt	tgagacc	GGTACAGTAAGTGAGAATCCTCTCT	GGTCTTGACAAACGTGTGCTTGTAC
PA14_00910	92439..92458	yes	TATGAGGACGAATCTCCCGCTTATA	TAGTTGGTGGGTTTCCCTACCGTGT	GGTCTCG	tata	GGCGTCCGGCGCGCTGACCT	gttt	tgagacc	GGTACAGTAAGTGAGAATCCTCTCT	GGTCTTGACAAACGTGTGCTTGTAC
PA14_00925	94020..94039	yes	TATGAGGACGAATCTCCCGCTTATA	TAGTTGGTGGGTTTCCCTACCGTGT	GGTCTCG	tata	CCGAAGGGATCGTCGATGGG	gttt	tgagacc	GGTACAGTAAGTGAGAATCCTCTCT	GGTCTTGACAAACGTGTGCTTGTAC
PA14_00940	95360..95379	yes	TATGAGGACGAATCTCCCGCTTATA	TAGTTGGTGGGTTTCCCTACCGTGT	GGTCTCG	tata	CCACACCACGCGGTTATTCC	gttt	tgagacc	GGTACAGTAAGTGAGAATCCTCTCT	GGTCTTGACAAACGTGTGCTTGTAC
PA14_00960	95804..95823	yes	TATGAGGACGAATCTCCCGCTTATA	TAGTTGGTGGGTTTCCCTACCGTGT	GGTCTCG	tata	CGGCGGGCTGGACGAACAGG	gttt	tgagacc	GGTACAGTAAGTGAGAATCCTCTCT	GGTCTTGACAAACGTGTGCTTGTAC
PA14_00970	96419..96438	yes	TATGAGGACGAATCTCCCGCTTATA	TAGTTGGTGGGTTTCCCTACCGTGT	GGTCTCG	tata	ATCTGCGCTTCGGCGCCGGC	gttt	tgagacc	GGTACAGTAAGTGAGAATCCTCTCT	GGTCTTGACAAACGTGTGCTTGTAC
PA14_00980	97384..97403	yes	TATGAGGACGAATCTCCCGCTTATA	TAGTTGGTGGGTTTCCCTACCGTGT	GGTCTCG	tata	CTGGTGATGGTCAATCGCAG	gttt	tgagacc	GGTACAGTAAGTGAGAATCCTCTCT	GGTCTTGACAAACGTGTGCTTGTAC
PA14_00990	97792..97811	yes	TATGAGGACGAATCTCCCGCTTATA	TAGTTGGTGGGTTTCCCTACCGTGT	GGTCTCG	tata	GATACGGCGGCCAGCAAAAC	gttt	tgagacc	GGTACAGTAAGTGAGAATCCTCTCT	GGTCTTGACAAACGTGTGCTTGTAC
PA14_01010	98916..98935	yes	TATGAGGACGAATCTCCCGCTTATA	TAGTTGGTGGGTTTCCCTACCGTGT	GGTCTCG	tata	GGCGATGAACTTCTGACTGC	gttt	tgagacc	GGTACAGTAAGTGAGAATCCTCTCT	GGTCTTGACAAACGTGTGCTTGTAC
PA14_01020	99438..99457	yes	TATGAGGACGAATCTCCCGCTTATA	TAGTTGGTGGGTTTCCCTACCGTGT	GGTCTCG	tata	CAGGTTCTCGGTGCTCAATT	gttt	tgagacc	GGTACAGTAAGTGAGAATCCTCTCT	GGTCTTGACAAACGTGTGCTTGTAC
PA14_01030	101052..101071	yes	TATGAGGACGAATCTCCCGCTTATA	TAGTTGGTGGGTTTCCCTACCGTGT	GGTCTCG	tata	CTCGGCGTGAGTCTTGTCCT	gttt	tgagacc	GGTACAGTAAGTGAGAATCCTCTCT	GGTCTTGACAAACGTGTGCTTGTAC
PA14_01040	101666..101685	yes	TATGAGGACGAATCTCCCGCTTATA	TAGTTGGTGGGTTTCCCTACCGTGT	GGTCTCG	tata	CCCGGATGCGAATGAAGGGT	gttt	tgagacc	GGTACAGTAAGTGAGAATCCTCTCT	GGTCTTGACAAACGTGTGCTTGTAC
PA14_01060	102522..102541	yes	TATGAGGACGAATCTCCCGCTTATA	TAGTTGGTGGGTTTCCCTACCGTGT	GGTCTCG	tata	CGGCTGCAGGCGCTCCTGGA	gttt	tgagacc	GGTACAGTAAGTGAGAATCCTCTCT	GGTCTTGACAAACGTGTGCTTGTAC
PA14_01070	103020..103039	yes	TATGAGGACGAATCTCCCGCTTATA	TAGTTGGTGGGTTTCCCTACCGTGT	GGTCTCG	tata	TGTAGTACTCGAGCAGGCGC	gttt	tgagacc	GGTACAGTAAGTGAGAATCCTCTCT	GGTCTTGACAAACGTGTGCTTGTAC
PA14_01070,PA14_01080	104851..104870	yes	TATGAGGACGAATCTCCCGCTTATA	TAGTTGGTGGGTTTCCCTACCGTGT	GGTCTCG	tata	CAGAGGTTCGGACGGCTGCC	gttt	tgagacc	GGTACAGTAAGTGAGAATCCTCTCT	GGTCTTGACAAACGTGTGCTTGTAC
PA14_01100	105921..105940	yes	TATGAGGACGAATCTCCCGCTTATA	TAGTTGGTGGGTTTCCCTACCGTGT	GGTCTCG	tata	CCTCGATGGCCTTGTAGGCC	gttt	tgagacc	GGTACAGTAAGTGAGAATCCTCTCT	GGTCTTGACAAACGTGTGCTTGTAC
PA14_01110	108642..108661	yes	TATGAGGACGAATCTCCCGCTTATA	TAGTTGGTGGGTTTCCCTACCGTGT	GGTCTCG	tata	GCAATCCACCTGGACCAGGC	gttt	tgagacc	GGTACAGTAAGTGAGAATCCTCTCT	GGTCTTGACAAACGTGTGCTTGTAC
PA14_01120	110933..110952	yes	TATGAGGACGAATCTCCCGCTTATA	TAGTTGGTGGGTTTCCCTACCGTGT	GGTCTCG	tata	GCGTTCGACATAGTTCACGG	gttt	tgagacc	GGTACAGTAAGTGAGAATCCTCTCT	GGTCTTGACAAACGTGTGCTTGTAC
PA14_01130	111155..111174	yes	TATGAGGACGAATCTCCCGCTTATA	TAGTTGGTGGGTTTCCCTACCGTGT	GGTCTCG	tata	GTCGATGTAGATATCGCGCC	gttt	tgagacc	GGTACAGTAAGTGAGAATCCTCTCT	GGTCTTGACAAACGTGTGCTTGTAC
PA14_01140	112485..112504	yes	TATGAGGACGAATCTCCCGCTTATA	TAGTTGGTGGGTTTCCCTACCGTGT	GGTCTCG	tata	CAGGGCTCCGGCCACGGCTC	gttt	tgagacc	GGTACAGTAAGTGAGAATCCTCTCT	GGTCTTGACAAACGTGTGCTTGTAC
PA14_01150	112991..113010	yes	TATGAGGACGAATCTCCCGCTTATA	TAGTTGGTGGGTTTCCCTACCGTGT	GGTCTCG	tata	TCTCGAGATCGGCTTCGTGG	gttt	tgagacc	GGTACAGTAAGTGAGAATCCTCTCT	GGTCTTGACAAACGTGTGCTTGTAC
PA14_01160	113303..113322	yes	TATGAGGACGAATCTCCCGCTTATA	TAGTTGGTGGGTTTCCCTACCGTGT	GGTCTCG	tata	ACTGTCGACCCGGACCAGGC	gttt	tgagacc	GGTACAGTAAGTGAGAATCCTCTCT	GGTCTTGACAAACGTGTGCTTGTAC
PA14_01170	115551..115570	yes	TATGAGGACGAATCTCCCGCTTATA	TAGTTGGTGGGTTTCCCTACCGTGT	GGTCTCG	tata	CCGTCGTGGCCCCAGGTAGA	gttt	tgagacc	GGTACAGTAAGTGAGAATCCTCTCT	GGTCTTGACAAACGTGTGCTTGTAC
PA14_01170,PA14_01180	115922..115941	yes	TATGAGGACGAATCTCCCGCTTATA	TAGTTGGTGGGTTTCCCTACCGTGT	GGTCTCG	tata	GGTGGAGCGGCTGGAGAGGT	gttt	tgagacc	GGTACAGTAAGTGAGAATCCTCTCT	GGTCTTGACAAACGTGTGCTTGTAC
PA14_11140	971130..971149	yes	TATGAGGACGAATCTCCCGCTTATA	TAGTTGGTGGGTTTCCCTACCGTGT	GGTCTCG	tata	GAGGGCGGGGCGTTCGGGAT	gttt	tgagacc	GGTACAGTAAGTGAGAATCCTCTCT	GGTCTTGACAAACGTGTGCTTGTAC
PA14_11150	971585..971604	yes	TATGAGGACGAATCTCCCGCTTATA	TAGTTGGTGGGTTTCCCTACCGTGT	GGTCTCG	tata	CCGCGCGCAACTCGCGAACC	gttt	tgagacc	GGTACAGTAAGTGAGAATCCTCTCT	GGTCTTGACAAACGTGTGCTTGTAC
PA14_11160	971960..971979	yes	TATGAGGACGAATCTCCCGCTTATA	TAGTTGGTGGGTTTCCCTACCGTGT	GGTCTCG	tata	TTCGAGGAAGAAACGTTTGT	gttt	tgagacc	GGTACAGTAAGTGAGAATCCTCTCT	GGTCTTGACAAACGTGTGCTTGTAC
PA14_11170	972169..972188	yes	TATGAGGACGAATCTCCCGCTTATA	TAGTTGGTGGGTTTCCCTACCGTGT	GGTCTCG	tata	GCCGCGCATCGGTGTGCGGC	gttt	tgagacc	GGTACAGTAAGTGAGAATCCTCTCT	GGTCTTGACAAACGTGTGCTTGTAC
PA14_11180	973569..973588	yes	TATGAGGACGAATCTCCCGCTTATA	TAGTTGGTGGGTTTCCCTACCGTGT	GGTCTCG	tata	AGGTCGGGCGACAGGGTCGA	gttt	tgagacc	GGTACAGTAAGTGAGAATCCTCTCT	GGTCTTGACAAACGTGTGCTTGTAC
PA14_11190	973836..973855	yes	TATGAGGACGAATCTCCCGCTTATA	TAGTTGGTGGGTTTCCCTACCGTGT	GGTCTCG	tata	GGCGCTGACGGACGGGTCGA	gttt	tgagacc	GGTACAGTAAGTGAGAATCCTCTCT	GGTCTTGACAAACGTGTGCTTGTAC
PA14_11210	975508..975527	yes	TATGAGGACGAATCTCCCGCTTATA	TAGTTGGTGGGTTTCCCTACCGTGT	GGTCTCG	tata	GTGCTGGGTGAGTCTGGAGT	gttt	tgagacc	GGTACAGTAAGTGAGAATCCTCTCT	GGTCTTGACAAACGTGTGCTTGTAC
PA14_11210,PA14_11230	976973..976992	yes	TATGAGGACGAATCTCCCGCTTATA	TAGTTGGTGGGTTTCCCTACCGTGT	GGTCTCG	tata	CTCATACCAGCGCGCCCAGG	gttt	tgagacc	GGTACAGTAAGTGAGAATCCTCTCT	GGTCTTGACAAACGTGTGCTTGTAC
PA14_11240	977715..977734	yes	TATGAGGACGAATCTCCCGCTTATA	TAGTTGGTGGGTTTCCCTACCGTGT	GGTCTCG	tata	GCTGTTGTGTGCGGAAGACA	gttt	tgagacc	GGTACAGTAAGTGAGAATCCTCTCT	GGTCTTGACAAACGTGTGCTTGTAC
PA14_11250	978938..978957	yes	TATGAGGACGAATCTCCCGCTTATA	TAGTTGGTGGGTTTCCCTACCGTGT	GGTCTCG	tata	TACCGCCGCCCAAAAGCATC	gttt	tgagacc	GGTACAGTAAGTGAGAATCCTCTCT	GGTCTTGACAAACGTGTGCTTGTAC
PA14_11260	979815..979834	yes	TATGAGGACGAATCTCCCGCTTATA	TAGTTGGTGGGTTTCCCTACCGTGT	GGTCTCG	tata	CGCCGCCAGTGATCAGGATG	gttt	tgagacc	GGTACAGTAAGTGAGAATCCTCTCT	GGTCTTGACAAACGTGTGCTTGTAC
PA14_11270	981837..981856	yes	TATGAGGACGAATCTCCCGCTTATA	TAGTTGGTGGGTTTCCCTACCGTGT	GGTCTCG	tata	CAGCAGGGAAGCGGTAAGCC	gttt	tgagacc	GGTACAGTAAGTGAGAATCCTCTCT	GGTCTTGACAAACGTGTGCTTGTAC
PA14_11280	982503..982522	yes	TATGAGGACGAATCTCCCGCTTATA	TAGTTGGTGGGTTTCCCTACCGTGT	GGTCTCG	tata	AGCCAGCAGGAGGACGGTCA	gttt	tgagacc	GGTACAGTAAGTGAGAATCCTCTCT	GGTCTTGACAAACGTGTGCTTGTAC
PA14_11290	983785..983804	yes	TATGAGGACGAATCTCCCGCTTATA	TAGTTGGTGGGTTTCCCTACCGTGT	GGTCTCG	tata	CCAGGCTGGCCAGTGCCAGT	gttt	tgagacc	GGTACAGTAAGTGAGAATCCTCTCT	GGTCTTGACAAACGTGTGCTTGTAC
PA14_11310	984477..984496	yes	TATGAGGACGAATCTCCCGCTTATA	TAGTTGGTGGGTTTCCCTACCGTGT	GGTCTCG	tata	GGCCGGGCCAGGCGAAGCCG	gttt	tgagacc	GGTACAGTAAGTGAGAATCCTCTCT	GGTCTTGACAAACGTGTGCTTGTAC
PA14_11320	985177..985196	yes	TATGAGGACGAATCTCCCGCTTATA	TAGTTGGTGGGTTTCCCTACCGTGT	GGTCTCG	tata	AGACGAGGGCTAACAGCAGT	gttt	tgagacc	GGTACAGTAAGTGAGAATCCTCTCT	GGTCTTGACAAACGTGTGCTTGTAC
PA14_11330	985373..985392	yes	TATGAGGACGAATCTCCCGCTTATA	TAGTTGGTGGGTTTCCCTACCGTGT	GGTCTCG	tata	AGTTCCAGGGTCAGGTCCAC	gttt	tgagacc	GGTACAGTAAGTGAGAATCCTCTCT	GGTCTTGACAAACGTGTGCTTGTAC
PA14_11340	986553..986572	yes	TATGAGGACGAATCTCCCGCTTATA	TAGTTGGTGGGTTTCCCTACCGTGT	GGTCTCG	tata	CCGGTGACGTCGAAGATGTA	gttt	tgagacc	GGTACAGTAAGTGAGAATCCTCTCT	GGTCTTGACAAACGTGTGCTTGTAC
PA14_11350	987290..987309	yes	TATGAGGACGAATCTCCCGCTTATA	TAGTTGGTGGGTTTCCCTACCGTGT	GGTCTCG	tata	AGCGCCTGGGTCAGGGCTTG	gttt	tgagacc	GGTACAGTAAGTGAGAATCCTCTCT	GGTCTTGACAAACGTGTGCTTGTAC
PA14_11370	987757..987776	yes	TATGAGGACGAATCTCCCGCTTATA	TAGTTGGTGGGTTTCCCTACCGTGT	GGTCTCG	tata	GCGATCGAGCGCAGGGTCAT	gttt	tgagacc	GGTACAGTAAGTGAGAATCCTCTCT	GGTCTTGACAAACGTGTGCTTGTAC
PA14_11380	987986..988005	yes	TATGAGGACGAATCTCCCGCTTATA	TAGTTGGTGGGTTTCCCTACCGTGT	GGTCTCG	tata	GTGTCATGGGCACCGCAGAA	gttt	tgagacc	GGTACAGTAAGTGAGAATCCTCTCT	GGTCTTGACAAACGTGTGCTTGTAC
PA14_11400	988445..988464	yes	TATGAGGACGAATCTCCCGCTTATA	TAGTTGGTGGGTTTCCCTACCGTGT	GGTCTCG	tata	GGCCATGTACAGCGGGTCGG	gttt	tgagacc	GGTACAGTAAGTGAGAATCCTCTCT	GGTCTTGACAAACGTGTGCTTGTAC
PA14_11410	989994..990013	yes	TATGAGGACGAATCTCCCGCTTATA	TAGTTGGTGGGTTTCCCTACCGTGT	GGTCTCG	tata	GCCGATCGATTCGATTATGC	gttt	tgagacc	GGTACAGTAAGTGAGAATCCTCTCT	GGTCTTGACAAACGTGTGCTTGTAC
PA14_11420	990711..990730	yes	TATGAGGACGAATCTCCCGCTTATA	TAGTTGGTGGGTTTCCCTACCGTGT	GGTCTCG	tata	GGATGACCATCTTGCCTTGG	gttt	tgagacc	GGTACAGTAAGTGAGAATCCTCTCT	GGTCTTGACAAACGTGTGCTTGTAC
PA14_11430	991892..991911	yes	TATGAGGACGAATCTCCCGCTTATA	TAGTTGGTGGGTTTCCCTACCGTGT	GGTCTCG	tata	GGTACCTTCGATGGTCTTCA	gttt	tgagacc	GGTACAGTAAGTGAGAATCCTCTCT	GGTCTTGACAAACGTGTGCTTGTAC
PA14_11450	992384..992403	yes	TATGAGGACGAATCTCCCGCTTATA	TAGTTGGTGGGTTTCCCTACCGTGT	GGTCTCG	tata	CTTTCGGCGGCTTGGCTGCC	gttt	tgagacc	GGTACAGTAAGTGAGAATCCTCTCT	GGTCTTGACAAACGTGTGCTTGTAC
PA14_11460	992879..992898	yes	TATGAGGACGAATCTCCCGCTTATA	TAGTTGGTGGGTTTCCCTACCGTGT	GGTCTCG	tata	CGGCCGCGGCGAAGAAGCGG	gttt	tgagacc	GGTACAGTAAGTGAGAATCCTCTCT	GGTCTTGACAAACGTGTGCTTGTAC
PA14_11470	993832..993851	yes	TATGAGGACGAATCTCCCGCTTATA	TAGTTGGTGGGTTTCCCTACCGTGT	GGTCTCG	tata	GGCTGCGCCGGCGCCTGATC	gttt	tgagacc	GGTACAGTAAGTGAGAATCCTCTCT	GGTCTTGACAAACGTGTGCTTGTAC
PA14_11480	994358..994377	yes	TATGAGGACGAATCTCCCGCTTATA	TAGTTGGTGGGTTTCCCTACCGTGT	GGTCTCG	tata	GCAGCCACAGGCAGCAGAAC	gttt	tgagacc	GGTACAGTAAGTGAGAATCCTCTCT	GGTCTTGACAAACGTGTGCTTGTAC
PA14_11490	995112..995131	yes	TATGAGGACGAATCTCCCGCTTATA	TAGTTGGTGGGTTTCCCTACCGTGT	GGTCTCG	tata	CGCGAGAACGCTGGAAAACA	gttt	tgagacc	GGTACAGTAAGTGAGAATCCTCTCT	GGTCTTGACAAACGTGTGCTTGTAC
PA14_11510	995872..995891	yes	TATGAGGACGAATCTCCCGCTTATA	TAGTTGGTGGGTTTCCCTACCGTGT	GGTCTCG	tata	GGAGGCGGCGACGAACACGA	gttt	tgagacc	GGTACAGTAAGTGAGAATCCTCTCT	GGTCTTGACAAACGTGTGCTTGTAC
PA14_11520	996490..996509	yes	TATGAGGACGAATCTCCCGCTTATA	TAGTTGGTGGGTTTCCCTACCGTGT	GGTCTCG	tata	CCAGCGCGCCGCGGGCTTGC	gttt	tgagacc	GGTACAGTAAGTGAGAATCCTCTCT	GGTCTTGACAAACGTGTGCTTGTAC
PA14_11530	996923..996942	yes	TATGAGGACGAATCTCCCGCTTATA	TAGTTGGTGGGTTTCCCTACCGTGT	GGTCTCG	tata	GGAAAGGCTGAGGAGCAGGC	gttt	tgagacc	GGTACAGTAAGTGAGAATCCTCTCT	GGTCTTGACAAACGTGTGCTTGTAC
PA14_11550	999677..999696	yes	TATGAGGACGAATCTCCCGCTTATA	TAGTTGGTGGGTTTCCCTACCGTGT	GGTCTCG	tata	GGAATCTCATGGAGCGTCTT	gttt	tgagacc	GGTACAGTAAGTGAGAATCCTCTCT	GGTCTTGACAAACGTGTGCTTGTAC
PA14_11560	1000621..1000640	yes	TATGAGGACGAATCTCCCGCTTATA	TAGTTGGTGGGTTTCCCTACCGTGT	GGTCTCG	tata	TTCGCGGGGAGCGACGAACA	gttt	tgagacc	GGTACAGTAAGTGAGAATCCTCTCT	GGTCTTGACAAACGTGTGCTTGTAC
PA14_11570	1000911..1000930	yes	TATGAGGACGAATCTCCCGCTTATA	TAGTTGGTGGGTTTCCCTACCGTGT	GGTCTCG	tata	GAAATCGAGGGTTTTCTTGC	gttt	tgagacc	GGTACAGTAAGTGAGAATCCTCTCT	GGTCTTGACAAACGTGTGCTTGTAC
PA14_11580	1001106..1001125	yes	TATGAGGACGAATCTCCCGCTTATA	TAGTTGGTGGGTTTCCCTACCGTGT	GGTCTCG	tata	TACTGCGTTCCCGGACCTCC	gttt	tgagacc	GGTACAGTAAGTGAGAATCCTCTCT	GGTCTTGACAAACGTGTGCTTGTAC
PA14_11590	1003476..1003495	yes	TATGAGGACGAATCTCCCGCTTATA	TAGTTGGTGGGTTTCCCTACCGTGT	GGTCTCG	tata	CGAGTCCCGCTATGCTACCC	gttt	tgagacc	GGTACAGTAAGTGAGAATCCTCTCT	GGTCTTGACAAACGTGTGCTTGTAC
PA14_11600	1005275..1005294	yes	TATGAGGACGAATCTCCCGCTTATA	TAGTTGGTGGGTTTCCCTACCGTGT	GGTCTCG	tata	CAGGCCGACGCCCGAGTACA	gttt	tgagacc	GGTACAGTAAGTGAGAATCCTCTCT	GGTCTTGACAAACGTGTGCTTGTAC
PA14_11610	1006025..1006044	yes	TATGAGGACGAATCTCCCGCTTATA	TAGTTGGTGGGTTTCCCTACCGTGT	GGTCTCG	tata	TCTGAAAATGGTGCCGATGG	gttt	tgagacc	GGTACAGTAAGTGAGAATCCTCTCT	GGTCTTGACAAACGTGTGCTTGTAC
PA14_11620	1006918..1006937	yes	TATGAGGACGAATCTCCCGCTTATA	TAGTTGGTGGGTTTCCCTACCGTGT	GGTCTCG	tata	GTCGTTTACCACCGTCCGGC	gttt	tgagacc	GGTACAGTAAGTGAGAATCCTCTCT	GGTCTTGACAAACGTGTGCTTGTAC
PA14_11630	1009643..1009662	yes	TATGAGGACGAATCTCCCGCTTATA	TAGTTGGTGGGTTTCCCTACCGTGT	GGTCTCG	tata	CCTGGCTGGGCTCGTCCTGG	gttt	tgagacc	GGTACAGTAAGTGAGAATCCTCTCT	GGTCTTGACAAACGTGTGCTTGTAC
PA14_11650	1010670..1010689	yes	TATGAGGACGAATCTCCCGCTTATA	TAGTTGGTGGGTTTCCCTACCGTGT	GGTCTCG	tata	GGATCGGGAAGTAAGGGCGA	gttt	tgagacc	GGTACAGTAAGTGAGAATCCTCTCT	GGTCTTGACAAACGTGTGCTTGTAC
PA14_11660	1011501..1011520	yes	TATGAGGACGAATCTCCCGCTTATA	TAGTTGGTGGGTTTCCCTACCGTGT	GGTCTCG	tata	GCCGCCCAATACCAGCCAGA	gttt	tgagacc	GGTACAGTAAGTGAGAATCCTCTCT	GGTCTTGACAAACGTGTGCTTGTAC
PA14_11670	1012140..1012159	yes	TATGAGGACGAATCTCCCGCTTATA	TAGTTGGTGGGTTTCCCTACCGTGT	GGTCTCG	tata	GCAAACGTTGGCTAACTGGC	gttt	tgagacc	GGTACAGTAAGTGAGAATCCTCTCT	GGTCTTGACAAACGTGTGCTTGTAC
PA14_11680	1012399..1012418	yes	TATGAGGACGAATCTCCCGCTTATA	TAGTTGGTGGGTTTCCCTACCGTGT	GGTCTCG	tata	CTGCTCGACCCGGTCCAGTT	gttt	tgagacc	GGTACAGTAAGTGAGAATCCTCTCT	GGTCTTGACAAACGTGTGCTTGTAC
PA14_11690	1013660..1013679	yes	TATGAGGACGAATCTCCCGCTTATA	TAGTTGGTGGGTTTCCCTACCGTGT	GGTCTCG	tata	TCGGCAGGTCCTTGCCGGCC	gttt	tgagacc	GGTACAGTAAGTGAGAATCCTCTCT	GGTCTTGACAAACGTGTGCTTGTAC
PA14_11700	1014571..1014590	yes	TATGAGGACGAATCTCCCGCTTATA	TAGTTGGTGGGTTTCCCTACCGTGT	GGTCTCG	tata	CAGCAGGCGCCGGCGCCGCC	gttt	tgagacc	GGTACAGTAAGTGAGAATCCTCTCT	GGTCTTGACAAACGTGTGCTTGTAC
PA14_11720	1015244..1015263	yes	TATGAGGACGAATCTCCCGCTTATA	TAGTTGGTGGGTTTCCCTACCGTGT	GGTCTCG	tata	GGTGGAGAATCAGATCGATT	gttt	tgagacc	GGTACAGTAAGTGAGAATCCTCTCT	GGTCTTGACAAACGTGTGCTTGTAC
PA14_11730	1015482..1015501	yes	TATGAGGACGAATCTCCCGCTTATA	TAGTTGGTGGGTTTCCCTACCGTGT	GGTCTCG	tata	GCGGTGGCTGGGCAAAAGGC	gttt	tgagacc	GGTACAGTAAGTGAGAATCCTCTCT	GGTCTTGACAAACGTGTGCTTGTAC
PA14_11740	1017777..1017796	yes	TATGAGGACGAATCTCCCGCTTATA	TAGTTGGTGGGTTTCCCTACCGTGT	GGTCTCG	tata	CGCCGGCCGTGGCGAGGAGC	gttt	tgagacc	GGTACAGTAAGTGAGAATCCTCTCT	GGTCTTGACAAACGTGTGCTTGTAC
PA14_11750	1018313..1018332	yes	TATGAGGACGAATCTCCCGCTTATA	TAGTTGGTGGGTTTCCCTACCGTGT	GGTCTCG	tata	CAGGTCGAGGTGTTCGAGGG	gttt	tgagacc	GGTACAGTAAGTGAGAATCCTCTCT	GGTCTTGACAAACGTGTGCTTGTAC
PA14_11760	1019300..1019319	yes	TATGAGGACGAATCTCCCGCTTATA	TAGTTGGTGGGTTTCCCTACCGTGT	GGTCTCG	tata	TCTCGGCGCTGGCGTCGGGC	gttt	tgagacc	GGTACAGTAAGTGAGAATCCTCTCT	GGTCTTGACAAACGTGTGCTTGTAC
PA14_11770	1020681..1020700	yes	TATGAGGACGAATCTCCCGCTTATA	TAGTTGGTGGGTTTCCCTACCGTGT	GGTCTCG	tata	CGTCCTTGAGGCTGTCGAAG	gttt	tgagacc	GGTACAGTAAGTGAGAATCCTCTCT	GGTCTTGACAAACGTGTGCTTGTAC
PA14_11790	1022222..1022241	yes	TATGAGGACGAATCTCCCGCTTATA	TAGTTGGTGGGTTTCCCTACCGTGT	GGTCTCG	tata	CGCATGGCCGGTTTGTTCGA	gttt	tgagacc	GGTACAGTAAGTGAGAATCCTCTCT	GGTCTTGACAAACGTGTGCTTGTAC
PA14_11810	1023946..1023965	no	TATGAGGACGAATCTCCCGCTTATA	TAGTTGGTGGGTTTCCCTACCGTGT	GGTCTCG	tata	GGCGCCTTCGCTACCGGGAT	gttt	tgagacc	GGTACAGTAAGTGAGAATCCTCTCT	GGTCTTGACAAACGTGTGCTTGTAC
PA14_11830	1024323..1024342	yes	TATGAGGACGAATCTCCCGCTTATA	TAGTTGGTGGGTTTCCCTACCGTGT	GGTCTCG	tata	TGGCGGCTCATGGAACTGGC	gttt	tgagacc	GGTACAGTAAGTGAGAATCCTCTCT	GGTCTTGACAAACGTGTGCTTGTAC
PA14_11845	1026417..1026436	yes	TATGAGGACGAATCTCCCGCTTATA	TAGTTGGTGGGTTTCCCTACCGTGT	GGTCTCG	tata	TCCCGCAGATGCCGAGTACG	gttt	tgagacc	GGTACAGTAAGTGAGAATCCTCTCT	GGTCTTGACAAACGTGTGCTTGTAC
PA14_11860	1027782..1027801	yes	TATGAGGACGAATCTCCCGCTTATA	TAGTTGGTGGGTTTCCCTACCGTGT	GGTCTCG	tata	ATCGCCAGGGTAATGCGTTC	gttt	tgagacc	GGTACAGTAAGTGAGAATCCTCTCT	GGTCTTGACAAACGTGTGCTTGTAC
PA14_11880	1028418..1028437	yes	TATGAGGACGAATCTCCCGCTTATA	TAGTTGGTGGGTTTCCCTACCGTGT	GGTCTCG	tata	AACCGCCCAACTGCACCGCC	gttt	tgagacc	GGTACAGTAAGTGAGAATCCTCTCT	GGTCTTGACAAACGTGTGCTTGTAC
PA14_11890	1029303..1029322	yes	TATGAGGACGAATCTCCCGCTTATA	TAGTTGGTGGGTTTCCCTACCGTGT	GGTCTCG	tata	CCGGCGAGCAGAACGCGCTT	gttt	tgagacc	GGTACAGTAAGTGAGAATCCTCTCT	GGTCTTGACAAACGTGTGCTTGTAC
PA14_11900	1031064..1031083	yes	TATGAGGACGAATCTCCCGCTTATA	TAGTTGGTGGGTTTCCCTACCGTGT	GGTCTCG	tata	GGCGGCGAGCAGGATGACCA	gttt	tgagacc	GGTACAGTAAGTGAGAATCCTCTCT	GGTCTTGACAAACGTGTGCTTGTAC
PA14_11910	1031744..1031763	yes	TATGAGGACGAATCTCCCGCTTATA	TAGTTGGTGGGTTTCCCTACCGTGT	GGTCTCG	tata	AGCGCTGCTACGGGTACGAA	gttt	tgagacc	GGTACAGTAAGTGAGAATCCTCTCT	GGTCTTGACAAACGTGTGCTTGTAC
PA14_11920	1031922..1031941	yes	TATGAGGACGAATCTCCCGCTTATA	TAGTTGGTGGGTTTCCCTACCGTGT	GGTCTCG	tata	ACCATTATGCCCAGCCCGCC	gttt	tgagacc	GGTACAGTAAGTGAGAATCCTCTCT	GGTCTTGACAAACGTGTGCTTGTAC
PA14_11930	1032332..1032351	yes	TATGAGGACGAATCTCCCGCTTATA	TAGTTGGTGGGTTTCCCTACCGTGT	GGTCTCG	tata	CGCCTCGAGGGCGGCCTGCC	gttt	tgagacc	GGTACAGTAAGTGAGAATCCTCTCT	GGTCTTGACAAACGTGTGCTTGTAC
PA14_11940	1033067..1033086	yes	TATGAGGACGAATCTCCCGCTTATA	TAGTTGGTGGGTTTCCCTACCGTGT	GGTCTCG	tata	ACGGCGTTGAGGGGAAACAA	gttt	tgagacc	GGTACAGTAAGTGAGAATCCTCTCT	GGTCTTGACAAACGTGTGCTTGTAC
PA14_11960	1034928..1034947	yes	TATGAGGACGAATCTCCCGCTTATA	TAGTTGGTGGGTTTCCCTACCGTGT	GGTCTCG	tata	CTCGGGGTTGGCGGCCATCC	gttt	tgagacc	GGTACAGTAAGTGAGAATCCTCTCT	GGTCTTGACAAACGTGTGCTTGTAC
PA14_11970	1035662..1035681	yes	TATGAGGACGAATCTCCCGCTTATA	TAGTTGGTGGGTTTCCCTACCGTGT	GGTCTCG	tata	CAAACTAAGGATGGGATCGC	gttt	tgagacc	GGTACAGTAAGTGAGAATCCTCTCT	GGTCTTGACAAACGTGTGCTTGTAC
PA14_11980	1035783..1035802	yes	TATGAGGACGAATCTCCCGCTTATA	TAGTTGGTGGGTTTCCCTACCGTGT	GGTCTCG	tata	ATGGGCGCTGGGCGTGATGT	gttt	tgagacc	GGTACAGTAAGTGAGAATCCTCTCT	GGTCTTGACAAACGTGTGCTTGTAC
PA14_11990	1037810..1037829	yes	TATGAGGACGAATCTCCCGCTTATA	TAGTTGGTGGGTTTCCCTACCGTGT	GGTCTCG	tata	ACTGTGCGCTGTAGTCGGTA	gttt	tgagacc	GGTACAGTAAGTGAGAATCCTCTCT	GGTCTTGACAAACGTGTGCTTGTAC
PA14_12010	1038145..1038164	yes	TATGAGGACGAATCTCCCGCTTATA	TAGTTGGTGGGTTTCCCTACCGTGT	GGTCTCG	tata	CATATAGTCGAGGACGGACT	gttt	tgagacc	GGTACAGTAAGTGAGAATCCTCTCT	GGTCTTGACAAACGTGTGCTTGTAC
PA14_12020	1039423..1039442	yes	TATGAGGACGAATCTCCCGCTTATA	TAGTTGGTGGGTTTCCCTACCGTGT	GGTCTCG	tata	GGTCGAAAGTGCCGCCGAAC	gttt	tgagacc	GGTACAGTAAGTGAGAATCCTCTCT	GGTCTTGACAAACGTGTGCTTGTAC
PA14_12030	1040080..1040099	yes	TATGAGGACGAATCTCCCGCTTATA	TAGTTGGTGGGTTTCCCTACCGTGT	GGTCTCG	tata	GGCCACTTGGACGAGTTGTT	gttt	tgagacc	GGTACAGTAAGTGAGAATCCTCTCT	GGTCTTGACAAACGTGTGCTTGTAC
PA14_12050	1040448..1040467	yes	TATGAGGACGAATCTCCCGCTTATA	TAGTTGGTGGGTTTCCCTACCGTGT	GGTCTCG	tata	TGCGCGAGCCAACCGCGATC	gttt	tgagacc	GGTACAGTAAGTGAGAATCCTCTCT	GGTCTTGACAAACGTGTGCTTGTAC
PA14_12060	1040920..1040939	yes	TATGAGGACGAATCTCCCGCTTATA	TAGTTGGTGGGTTTCCCTACCGTGT	GGTCTCG	tata	TCTTTCAGGTGGATCGGCTG	gttt	tgagacc	GGTACAGTAAGTGAGAATCCTCTCT	GGTCTTGACAAACGTGTGCTTGTAC
PA14_12070	1042918..1042937	yes	TATGAGGACGAATCTCCCGCTTATA	TAGTTGGTGGGTTTCCCTACCGTGT	GGTCTCG	tata	GGAGAATCCCGTCGATGTGC	gttt	tgagacc	GGTACAGTAAGTGAGAATCCTCTCT	GGTCTTGACAAACGTGTGCTTGTAC
PA14_12080	1044038..1044057	yes	TATGAGGACGAATCTCCCGCTTATA	TAGTTGGTGGGTTTCCCTACCGTGT	GGTCTCG	tata	GCCGACCCATTGGACGCCCC	gttt	tgagacc	GGTACAGTAAGTGAGAATCCTCTCT	GGTCTTGACAAACGTGTGCTTGTAC
PA14_12090	1045034..1045053	yes	TATGAGGACGAATCTCCCGCTTATA	TAGTTGGTGGGTTTCCCTACCGTGT	GGTCTCG	tata	CGGGCAGGATCAGGGAGGAG	gttt	tgagacc	GGTACAGTAAGTGAGAATCCTCTCT	GGTCTTGACAAACGTGTGCTTGTAC
PA14_12100	1046121..1046140	yes	TATGAGGACGAATCTCCCGCTTATA	TAGTTGGTGGGTTTCCCTACCGTGT	GGTCTCG	tata	TGACAAGCGTTTCGCGATAG	gttt	tgagacc	GGTACAGTAAGTGAGAATCCTCTCT	GGTCTTGACAAACGTGTGCTTGTAC
PA14_12110	1047346..1047365	yes	TATGAGGACGAATCTCCCGCTTATA	TAGTTGGTGGGTTTCCCTACCGTGT	GGTCTCG	tata	GGGTTGAACGTCAGGGGTAT	gttt	tgagacc	GGTACAGTAAGTGAGAATCCTCTCT	GGTCTTGACAAACGTGTGCTTGTAC
PA14_12120	1047643..1047662	yes	TATGAGGACGAATCTCCCGCTTATA	TAGTTGGTGGGTTTCCCTACCGTGT	GGTCTCG	tata	AGGGAACCTCGCCGAGCTCA	gttt	tgagacc	GGTACAGTAAGTGAGAATCCTCTCT	GGTCTTGACAAACGTGTGCTTGTAC
PA14_12130	1048295..1048314	yes	TATGAGGACGAATCTCCCGCTTATA	TAGTTGGTGGGTTTCCCTACCGTGT	GGTCTCG	tata	CTTGCCCGGCTTGGCTTCTC	gttt	tgagacc	GGTACAGTAAGTGAGAATCCTCTCT	GGTCTTGACAAACGTGTGCTTGTAC
PA14_12140	1050259..1050278	yes	TATGAGGACGAATCTCCCGCTTATA	TAGTTGGTGGGTTTCCCTACCGTGT	GGTCTCG	tata	CAGGGATTGGGAGGTGGGGA	gttt	tgagacc	GGTACAGTAAGTGAGAATCCTCTCT	GGTCTTGACAAACGTGTGCTTGTAC
PA14_12150	1050407..1050426	yes	TATGAGGACGAATCTCCCGCTTATA	TAGTTGGTGGGTTTCCCTACCGTGT	GGTCTCG	tata	CGGTGGAAACGAAGGCATAG	gttt	tgagacc	GGTACAGTAAGTGAGAATCCTCTCT	GGTCTTGACAAACGTGTGCTTGTAC
PA14_12160	1052808..1052827	yes	TATGAGGACGAATCTCCCGCTTATA	TAGTTGGTGGGTTTCCCTACCGTGT	GGTCTCG	tata	TCAGCAGGGCGGATCGTTCG	gttt	tgagacc	GGTACAGTAAGTGAGAATCCTCTCT	GGTCTTGACAAACGTGTGCTTGTAC
PA14_12170	1053080..1053099	yes	TATGAGGACGAATCTCCCGCTTATA	TAGTTGGTGGGTTTCCCTACCGTGT	GGTCTCG	tata	GGCCAGGAAGAAGAAGTCGA	gttt	tgagacc	GGTACAGTAAGTGAGAATCCTCTCT	GGTCTTGACAAACGTGTGCTTGTAC
PA14_12180	1053510..1053529	yes	TATGAGGACGAATCTCCCGCTTATA	TAGTTGGTGGGTTTCCCTACCGTGT	GGTCTCG	tata	ACCAGGGATTTGGCCTTGTT	gttt	tgagacc	GGTACAGTAAGTGAGAATCCTCTCT	GGTCTTGACAAACGTGTGCTTGTAC
PA14_12200	1054648..1054667	yes	TATGAGGACGAATCTCCCGCTTATA	TAGTTGGTGGGTTTCCCTACCGTGT	GGTCTCG	tata	AGGTGCTTGGCGAGTTGCGC	gttt	tgagacc	GGTACAGTAAGTGAGAATCCTCTCT	GGTCTTGACAAACGTGTGCTTGTAC
PA14_12210	1055310..1055329	yes	TATGAGGACGAATCTCCCGCTTATA	TAGTTGGTGGGTTTCCCTACCGTGT	GGTCTCG	tata	CGATCAGCGCGGCGCTGGTC	gttt	tgagacc	GGTACAGTAAGTGAGAATCCTCTCT	GGTCTTGACAAACGTGTGCTTGTAC
PA14_12230	1057991..1058010	yes	TATGAGGACGAATCTCCCGCTTATA	TAGTTGGTGGGTTTCCCTACCGTGT	GGTCTCG	tata	GCCTGGGTTTCGATCTCGAG	gttt	tgagacc	GGTACAGTAAGTGAGAATCCTCTCT	GGTCTTGACAAACGTGTGCTTGTAC
PA14_12260	1058272..1058291	yes	TATGAGGACGAATCTCCCGCTTATA	TAGTTGGTGGGTTTCCCTACCGTGT	GGTCTCG	tata	ATCCGCTTCATCCAGAGCCA	gttt	tgagacc	GGTACAGTAAGTGAGAATCCTCTCT	GGTCTTGACAAACGTGTGCTTGTAC
PA14_12270	1058712..1058731	yes	TATGAGGACGAATCTCCCGCTTATA	TAGTTGGTGGGTTTCCCTACCGTGT	GGTCTCG	tata	TGCTTGAAGAAATAACGGAT	gttt	tgagacc	GGTACAGTAAGTGAGAATCCTCTCT	GGTCTTGACAAACGTGTGCTTGTAC
PA14_12280	1061011..1061030	yes	TATGAGGACGAATCTCCCGCTTATA	TAGTTGGTGGGTTTCCCTACCGTGT	GGTCTCG	tata	CAGCAGGTGTCCGGGCCAGC	gttt	tgagacc	GGTACAGTAAGTGAGAATCCTCTCT	GGTCTTGACAAACGTGTGCTTGTAC
PA14_12300	1062044..1062063	yes	TATGAGGACGAATCTCCCGCTTATA	TAGTTGGTGGGTTTCCCTACCGTGT	GGTCTCG	tata	ACTTGTGCCCGTTGCTCGAT	gttt	tgagacc	GGTACAGTAAGTGAGAATCCTCTCT	GGTCTTGACAAACGTGTGCTTGTAC
PA14_12310,PA14_12330	1062531..1062550	yes	TATGAGGACGAATCTCCCGCTTATA	TAGTTGGTGGGTTTCCCTACCGTGT	GGTCTCG	tata	ACCTGCAGGTCGAGCTCAAG	gttt	tgagacc	GGTACAGTAAGTGAGAATCCTCTCT	GGTCTTGACAAACGTGTGCTTGTAC
PA14_12330	1063539..1063558	yes	TATGAGGACGAATCTCCCGCTTATA	TAGTTGGTGGGTTTCCCTACCGTGT	GGTCTCG	tata	AAAGCGATGAAGTTCCTGGG	gttt	tgagacc	GGTACAGTAAGTGAGAATCCTCTCT	GGTCTTGACAAACGTGTGCTTGTAC
PA14_12350	1065051..1065070	yes	TATGAGGACGAATCTCCCGCTTATA	TAGTTGGTGGGTTTCCCTACCGTGT	GGTCTCG	tata	GGTTTCGATGAAAAGCTTCT	gttt	tgagacc	GGTACAGTAAGTGAGAATCCTCTCT	GGTCTTGACAAACGTGTGCTTGTAC
PA14_12360	1065226..1065245	yes	TATGAGGACGAATCTCCCGCTTATA	TAGTTGGTGGGTTTCCCTACCGTGT	GGTCTCG	tata	GGAAAATCACCTTGTAGATG	gttt	tgagacc	GGTACAGTAAGTGAGAATCCTCTCT	GGTCTTGACAAACGTGTGCTTGTAC
PA14_12370	1066075..1066094	yes	TATGAGGACGAATCTCCCGCTTATA	TAGTTGGTGGGTTTCCCTACCGTGT	GGTCTCG	tata	GGGCGAGGGTGCGGCCGGTA	gttt	tgagacc	GGTACAGTAAGTGAGAATCCTCTCT	GGTCTTGACAAACGTGTGCTTGTAC
PA14_12390	1067567..1067586	yes	TATGAGGACGAATCTCCCGCTTATA	TAGTTGGTGGGTTTCCCTACCGTGT	GGTCTCG	tata	TGTTGAACAGCGTTTCGGAA	gttt	tgagacc	GGTACAGTAAGTGAGAATCCTCTCT	GGTCTTGACAAACGTGTGCTTGTAC
PA14_12400	1068225..1068244	yes	TATGAGGACGAATCTCCCGCTTATA	TAGTTGGTGGGTTTCCCTACCGTGT	GGTCTCG	tata	GGCTATCGGTGATGGCGTAC	gttt	tgagacc	GGTACAGTAAGTGAGAATCCTCTCT	GGTCTTGACAAACGTGTGCTTGTAC
PA14_12410	1069038..1069057	yes	TATGAGGACGAATCTCCCGCTTATA	TAGTTGGTGGGTTTCCCTACCGTGT	GGTCTCG	tata	AGCACTACGGGGCGGGAAGT	gttt	tgagacc	GGTACAGTAAGTGAGAATCCTCTCT	GGTCTTGACAAACGTGTGCTTGTAC
PA14_12420	1069319..1069338	yes	TATGAGGACGAATCTCCCGCTTATA	TAGTTGGTGGGTTTCCCTACCGTGT	GGTCTCG	tata	CTCACCGCACCCGCCAGGCA	gttt	tgagacc	GGTACAGTAAGTGAGAATCCTCTCT	GGTCTTGACAAACGTGTGCTTGTAC
PA14_12420,PA14_12430	1070482..1070501	yes	TATGAGGACGAATCTCCCGCTTATA	TAGTTGGTGGGTTTCCCTACCGTGT	GGTCTCG	tata	CTTCATCGCGTTGATCCGGT	gttt	tgagacc	GGTACAGTAAGTGAGAATCCTCTCT	GGTCTTGACAAACGTGTGCTTGTAC
PA14_12440	1071841..1071860	yes	TATGAGGACGAATCTCCCGCTTATA	TAGTTGGTGGGTTTCCCTACCGTGT	GGTCTCG	tata	ATCGCGTTGCAGGCGGCGTT	gttt	tgagacc	GGTACAGTAAGTGAGAATCCTCTCT	GGTCTTGACAAACGTGTGCTTGTAC
PA14_12450	1072474..1072493	yes	TATGAGGACGAATCTCCCGCTTATA	TAGTTGGTGGGTTTCCCTACCGTGT	GGTCTCG	tata	GGGTTTCGGCGTACTGGTGC	gttt	tgagacc	GGTACAGTAAGTGAGAATCCTCTCT	GGTCTTGACAAACGTGTGCTTGTAC
PA14_12470	1074142..1074161	yes	TATGAGGACGAATCTCCCGCTTATA	TAGTTGGTGGGTTTCCCTACCGTGT	GGTCTCG	tata	TCGACCAGCTCCCGGTAGCG	gttt	tgagacc	GGTACAGTAAGTGAGAATCCTCTCT	GGTCTTGACAAACGTGTGCTTGTAC
PA14_12490	1074623..1074642	yes	TATGAGGACGAATCTCCCGCTTATA	TAGTTGGTGGGTTTCCCTACCGTGT	GGTCTCG	tata	ACTCATGGTGGGCTTCCTGT	gttt	tgagacc	GGTACAGTAAGTGAGAATCCTCTCT	GGTCTTGACAAACGTGTGCTTGTAC
PA14_12530	1077847..1077866	yes	TATGAGGACGAATCTCCCGCTTATA	TAGTTGGTGGGTTTCCCTACCGTGT	GGTCTCG	tata	AGCCAGGTGGGACGCAGGGA	gttt	tgagacc	GGTACAGTAAGTGAGAATCCTCTCT	GGTCTTGACAAACGTGTGCTTGTAC
PA14_12540	1078018..1078037	yes	TATGAGGACGAATCTCCCGCTTATA	TAGTTGGTGGGTTTCCCTACCGTGT	GGTCTCG	tata	CGGCTCGCTCGGCGGCGCCT	gttt	tgagacc	GGTACAGTAAGTGAGAATCCTCTCT	GGTCTTGACAAACGTGTGCTTGTAC
PA14_12550	1078977..1078996	yes	TATGAGGACGAATCTCCCGCTTATA	TAGTTGGTGGGTTTCCCTACCGTGT	GGTCTCG	tata	ACTCTGCATGACGCGGTCGG	gttt	tgagacc	GGTACAGTAAGTGAGAATCCTCTCT	GGTCTTGACAAACGTGTGCTTGTAC
PA14_12560	1079288..1079307	yes	TATGAGGACGAATCTCCCGCTTATA	TAGTTGGTGGGTTTCCCTACCGTGT	GGTCTCG	tata	ATCCACTCTTCGAACAGTTC	gttt	tgagacc	GGTACAGTAAGTGAGAATCCTCTCT	GGTCTTGACAAACGTGTGCTTGTAC
PA14_12570	1079994..1080013	yes	TATGAGGACGAATCTCCCGCTTATA	TAGTTGGTGGGTTTCCCTACCGTGT	GGTCTCG	tata	TCATGGCGAGGATTTCTTTC	gttt	tgagacc	GGTACAGTAAGTGAGAATCCTCTCT	GGTCTTGACAAACGTGTGCTTGTAC
PA14_12590,PA14_12610	1081169..1081188	yes	TATGAGGACGAATCTCCCGCTTATA	TAGTTGGTGGGTTTCCCTACCGTGT	GGTCTCG	tata	GCCGACCACTTCCTGCGGGT	gttt	tgagacc	GGTACAGTAAGTGAGAATCCTCTCT	GGTCTTGACAAACGTGTGCTTGTAC
PA14_12610	1082019..1082038	yes	TATGAGGACGAATCTCCCGCTTATA	TAGTTGGTGGGTTTCCCTACCGTGT	GGTCTCG	tata	AGGCGGGCGTGGGGGGAATC	gttt	tgagacc	GGTACAGTAAGTGAGAATCCTCTCT	GGTCTTGACAAACGTGTGCTTGTAC
PA14_12620	1082525..1082544	yes	TATGAGGACGAATCTCCCGCTTATA	TAGTTGGTGGGTTTCCCTACCGTGT	GGTCTCG	tata	CACAGGAAACGCGGGTGGCA	gttt	tgagacc	GGTACAGTAAGTGAGAATCCTCTCT	GGTCTTGACAAACGTGTGCTTGTAC
PA14_12630	1082731..1082750	no	TATGAGGACGAATCTCCCGCTTATA	TAGTTGGTGGGTTTCCCTACCGTGT	GGTCTCG	tata	TGCACCAAGGGCCTGGCGCA	gttt	tgagacc	GGTACAGTAAGTGAGAATCCTCTCT	GGTCTTGACAAACGTGTGCTTGTAC
PA14_12640	1085600..1085619	yes	TATGAGGACGAATCTCCCGCTTATA	TAGTTGGTGGGTTTCCCTACCGTGT	GGTCTCG	tata	GATCGTGCAGCAGGGGATGG	gttt	tgagacc	GGTACAGTAAGTGAGAATCCTCTCT	GGTCTTGACAAACGTGTGCTTGTAC
PA14_12650	1086362..1086381	yes	TATGAGGACGAATCTCCCGCTTATA	TAGTTGGTGGGTTTCCCTACCGTGT	GGTCTCG	tata	AGGGGCGTTGTGGTGCGTAG	gttt	tgagacc	GGTACAGTAAGTGAGAATCCTCTCT	GGTCTTGACAAACGTGTGCTTGTAC
PA14_12670	1087565..1087584	yes	TATGAGGACGAATCTCCCGCTTATA	TAGTTGGTGGGTTTCCCTACCGTGT	GGTCTCG	tata	CAATCGAGACTATGCTGGAA	gttt	tgagacc	GGTACAGTAAGTGAGAATCCTCTCT	GGTCTTGACAAACGTGTGCTTGTAC
PA14_12680	1087684..1087703	yes	TATGAGGACGAATCTCCCGCTTATA	TAGTTGGTGGGTTTCCCTACCGTGT	GGTCTCG	tata	TGGCTGCTGAATACCTTGCG	gttt	tgagacc	GGTACAGTAAGTGAGAATCCTCTCT	GGTCTTGACAAACGTGTGCTTGTAC
PA14_12690	1088917..1088936	yes	TATGAGGACGAATCTCCCGCTTATA	TAGTTGGTGGGTTTCCCTACCGTGT	GGTCTCG	tata	GTGGGAAATGCAGCTGGGGT	gttt	tgagacc	GGTACAGTAAGTGAGAATCCTCTCT	GGTCTTGACAAACGTGTGCTTGTAC
PA14_12700	1089641..1089660	yes	TATGAGGACGAATCTCCCGCTTATA	TAGTTGGTGGGTTTCCCTACCGTGT	GGTCTCG	tata	AAGAACCAGGCGTCACGCAG	gttt	tgagacc	GGTACAGTAAGTGAGAATCCTCTCT	GGTCTTGACAAACGTGTGCTTGTAC
PA14_12710	1090829..1090848	yes	TATGAGGACGAATCTCCCGCTTATA	TAGTTGGTGGGTTTCCCTACCGTGT	GGTCTCG	tata	AGTGGATCGGCTGTTGCTCT	gttt	tgagacc	GGTACAGTAAGTGAGAATCCTCTCT	GGTCTTGACAAACGTGTGCTTGTAC
PA14_12730	1091565..1091584	yes	TATGAGGACGAATCTCCCGCTTATA	TAGTTGGTGGGTTTCCCTACCGTGT	GGTCTCG	tata	GCCGTGCGGAGCGCTGGGCG	gttt	tgagacc	GGTACAGTAAGTGAGAATCCTCTCT	GGTCTTGACAAACGTGTGCTTGTAC
PA14_12740	1091859..1091878	no	TATGAGGACGAATCTCCCGCTTATA	TAGTTGGTGGGTTTCCCTACCGTGT	GGTCTCG	tata	GGCGCTTCAGCGCGGCTTCC	gttt	tgagacc	GGTACAGTAAGTGAGAATCCTCTCT	GGTCTTGACAAACGTGTGCTTGTAC
PA14_12750	1092489..1092508	yes	TATGAGGACGAATCTCCCGCTTATA	TAGTTGGTGGGTTTCCCTACCGTGT	GGTCTCG	tata	TTCTTCGCCGCGGGCGACTC	gttt	tgagacc	GGTACAGTAAGTGAGAATCCTCTCT	GGTCTTGACAAACGTGTGCTTGTAC
PA14_12760	1093074..1093093	yes	TATGAGGACGAATCTCCCGCTTATA	TAGTTGGTGGGTTTCCCTACCGTGT	GGTCTCG	tata	CAGGGGGTCGAGCAGACCGA	gttt	tgagacc	GGTACAGTAAGTGAGAATCCTCTCT	GGTCTTGACAAACGTGTGCTTGTAC
PA14_12770	1095579..1095598	yes	TATGAGGACGAATCTCCCGCTTATA	TAGTTGGTGGGTTTCCCTACCGTGT	GGTCTCG	tata	CGCCTGGCTCAGGACCTCCG	gttt	tgagacc	GGTACAGTAAGTGAGAATCCTCTCT	GGTCTTGACAAACGTGTGCTTGTAC
PA14_12780	1096545..1096564	yes	TATGAGGACGAATCTCCCGCTTATA	TAGTTGGTGGGTTTCCCTACCGTGT	GGTCTCG	tata	CGGCGAGGCGGATGACGGGG	gttt	tgagacc	GGTACAGTAAGTGAGAATCCTCTCT	GGTCTTGACAAACGTGTGCTTGTAC
PA14_12810	1096914..1096933	yes	TATGAGGACGAATCTCCCGCTTATA	TAGTTGGTGGGTTTCCCTACCGTGT	GGTCTCG	tata	ACGGCTACCAGGCGCTGAAA	gttt	tgagacc	GGTACAGTAAGTGAGAATCCTCTCT	GGTCTTGACAAACGTGTGCTTGTAC
PA14_12820	1098190..1098209	yes	TATGAGGACGAATCTCCCGCTTATA	TAGTTGGTGGGTTTCCCTACCGTGT	GGTCTCG	tata	GGCGTCCGCCCGACAGCAGC	gttt	tgagacc	GGTACAGTAAGTGAGAATCCTCTCT	GGTCTTGACAAACGTGTGCTTGTAC
PA14_12840	1102015..1102034	yes	TATGAGGACGAATCTCCCGCTTATA	TAGTTGGTGGGTTTCCCTACCGTGT	GGTCTCG	tata	GATGCTCAGGCTGGTCAGGT	gttt	tgagacc	GGTACAGTAAGTGAGAATCCTCTCT	GGTCTTGACAAACGTGTGCTTGTAC
PA14_12850	1102639..1102658	yes	TATGAGGACGAATCTCCCGCTTATA	TAGTTGGTGGGTTTCCCTACCGTGT	GGTCTCG	tata	CGGAAATGGCGGAAGGGGGA	gttt	tgagacc	GGTACAGTAAGTGAGAATCCTCTCT	GGTCTTGACAAACGTGTGCTTGTAC
PA14_12860	1103237..1103256	yes	TATGAGGACGAATCTCCCGCTTATA	TAGTTGGTGGGTTTCCCTACCGTGT	GGTCTCG	tata	ATGCATGCTGAGGCGATGGT	gttt	tgagacc	GGTACAGTAAGTGAGAATCCTCTCT	GGTCTTGACAAACGTGTGCTTGTAC
PA14_12870	1104842..1104861	yes	TATGAGGACGAATCTCCCGCTTATA	TAGTTGGTGGGTTTCCCTACCGTGT	GGTCTCG	tata	CACCAGGTTGTCCAGTATCT	gttt	tgagacc	GGTACAGTAAGTGAGAATCCTCTCT	GGTCTTGACAAACGTGTGCTTGTAC
PA14_12890	1105714..1105733	yes	TATGAGGACGAATCTCCCGCTTATA	TAGTTGGTGGGTTTCCCTACCGTGT	GGTCTCG	tata	GAACACCCAGTGGCGGATGT	gttt	tgagacc	GGTACAGTAAGTGAGAATCCTCTCT	GGTCTTGACAAACGTGTGCTTGTAC
PA14_12900	1106670..1106689	yes	TATGAGGACGAATCTCCCGCTTATA	TAGTTGGTGGGTTTCCCTACCGTGT	GGTCTCG	tata	GTCCTGGATCAGTTGGTCTT	gttt	tgagacc	GGTACAGTAAGTGAGAATCCTCTCT	GGTCTTGACAAACGTGTGCTTGTAC
PA14_12910	1107085..1107104	yes	TATGAGGACGAATCTCCCGCTTATA	TAGTTGGTGGGTTTCCCTACCGTGT	GGTCTCG	tata	GGGGTCGGGCGAGTGGAGCC	gttt	tgagacc	GGTACAGTAAGTGAGAATCCTCTCT	GGTCTTGACAAACGTGTGCTTGTAC
PA14_12920	1107469..1107488	yes	TATGAGGACGAATCTCCCGCTTATA	TAGTTGGTGGGTTTCCCTACCGTGT	GGTCTCG	tata	CCAGGCGGTGCAGGGAATTC	gttt	tgagacc	GGTACAGTAAGTGAGAATCCTCTCT	GGTCTTGACAAACGTGTGCTTGTAC
PA14_12940	1108543..1108562	yes	TATGAGGACGAATCTCCCGCTTATA	TAGTTGGTGGGTTTCCCTACCGTGT	GGTCTCG	tata	TGATCGCCTCGGCCGTCAGA	gttt	tgagacc	GGTACAGTAAGTGAGAATCCTCTCT	GGTCTTGACAAACGTGTGCTTGTAC
PA14_12940,PA14_12960	1109322..1109341	yes	TATGAGGACGAATCTCCCGCTTATA	TAGTTGGTGGGTTTCCCTACCGTGT	GGTCTCG	tata	GCGAGTCCGAGGGTATCAGT	gttt	tgagacc	GGTACAGTAAGTGAGAATCCTCTCT	GGTCTTGACAAACGTGTGCTTGTAC
PA14_12970	1110249..1110268	yes	TATGAGGACGAATCTCCCGCTTATA	TAGTTGGTGGGTTTCCCTACCGTGT	GGTCTCG	tata	GGCTGATGGGTTGGATGGTC	gttt	tgagacc	GGTACAGTAAGTGAGAATCCTCTCT	GGTCTTGACAAACGTGTGCTTGTAC
PA14_12980	1111254..1111273	yes	TATGAGGACGAATCTCCCGCTTATA	TAGTTGGTGGGTTTCCCTACCGTGT	GGTCTCG	tata	CTGGCAGGGTCAGCTCATCC	gttt	tgagacc	GGTACAGTAAGTGAGAATCCTCTCT	GGTCTTGACAAACGTGTGCTTGTAC
PA14_12990	1115314..1115333	yes	TATGAGGACGAATCTCCCGCTTATA	TAGTTGGTGGGTTTCCCTACCGTGT	GGTCTCG	tata	GCCGCACCGTAGAACACCGG	gttt	tgagacc	GGTACAGTAAGTGAGAATCCTCTCT	GGTCTTGACAAACGTGTGCTTGTAC
PA14_13000	1116472..1116491	yes	TATGAGGACGAATCTCCCGCTTATA	TAGTTGGTGGGTTTCCCTACCGTGT	GGTCTCG	tata	AAGGTCAACGGCGCGGGGCG	gttt	tgagacc	GGTACAGTAAGTGAGAATCCTCTCT	GGTCTTGACAAACGTGTGCTTGTAC
PA14_13010	1117425..1117444	yes	TATGAGGACGAATCTCCCGCTTATA	TAGTTGGTGGGTTTCCCTACCGTGT	GGTCTCG	tata	CGGAGGCCAGGGCAGTCAGC	gttt	tgagacc	GGTACAGTAAGTGAGAATCCTCTCT	GGTCTTGACAAACGTGTGCTTGTAC
PA14_13030	1117925..1117944	yes	TATGAGGACGAATCTCCCGCTTATA	TAGTTGGTGGGTTTCCCTACCGTGT	GGTCTCG	tata	ACGCGAACTGGATGCGGGCA	gttt	tgagacc	GGTACAGTAAGTGAGAATCCTCTCT	GGTCTTGACAAACGTGTGCTTGTAC
PA14_13040	1119387..1119406	yes	TATGAGGACGAATCTCCCGCTTATA	TAGTTGGTGGGTTTCCCTACCGTGT	GGTCTCG	tata	ATGATGACCGCCCAGATGAG	gttt	tgagacc	GGTACAGTAAGTGAGAATCCTCTCT	GGTCTTGACAAACGTGTGCTTGTAC
PA14_13050	1120398..1120417	yes	TATGAGGACGAATCTCCCGCTTATA	TAGTTGGTGGGTTTCCCTACCGTGT	GGTCTCG	tata	GTTCGGGATGACTCGGCGTA	gttt	tgagacc	GGTACAGTAAGTGAGAATCCTCTCT	GGTCTTGACAAACGTGTGCTTGTAC
PA14_13060	1121587..1121606	yes	TATGAGGACGAATCTCCCGCTTATA	TAGTTGGTGGGTTTCCCTACCGTGT	GGTCTCG	tata	CGGCCAGCAGGCCGTCCGGG	gttt	tgagacc	GGTACAGTAAGTGAGAATCCTCTCT	GGTCTTGACAAACGTGTGCTTGTAC
PA14_13070	1121733..1121752	yes	TATGAGGACGAATCTCCCGCTTATA	TAGTTGGTGGGTTTCCCTACCGTGT	GGTCTCG	tata	AGCGGATAACGGTTCGAGGT	gttt	tgagacc	GGTACAGTAAGTGAGAATCCTCTCT	GGTCTTGACAAACGTGTGCTTGTAC
PA14_13090	1124094..1124113	yes	TATGAGGACGAATCTCCCGCTTATA	TAGTTGGTGGGTTTCCCTACCGTGT	GGTCTCG	tata	GCCCATAGGAGTACGGGCGC	gttt	tgagacc	GGTACAGTAAGTGAGAATCCTCTCT	GGTCTTGACAAACGTGTGCTTGTAC
PA14_13110	1124333..1124352	yes	TATGAGGACGAATCTCCCGCTTATA	TAGTTGGTGGGTTTCCCTACCGTGT	GGTCTCG	tata	GGCGGCGGCCGGGATGAGAC	gttt	tgagacc	GGTACAGTAAGTGAGAATCCTCTCT	GGTCTTGACAAACGTGTGCTTGTAC
PA14_13130	1126224..1126243	yes	TATGAGGACGAATCTCCCGCTTATA	TAGTTGGTGGGTTTCCCTACCGTGT	GGTCTCG	tata	CCGACGCGAGAACGGATTAC	gttt	tgagacc	GGTACAGTAAGTGAGAATCCTCTCT	GGTCTTGACAAACGTGTGCTTGTAC
PA14_13140	1128231..1128250	yes	TATGAGGACGAATCTCCCGCTTATA	TAGTTGGTGGGTTTCCCTACCGTGT	GGTCTCG	tata	CAGGCTCAGGGCCAGTACAC	gttt	tgagacc	GGTACAGTAAGTGAGAATCCTCTCT	GGTCTTGACAAACGTGTGCTTGTAC
PA14_13150	1129923..1129942	yes	TATGAGGACGAATCTCCCGCTTATA	TAGTTGGTGGGTTTCCCTACCGTGT	GGTCTCG	tata	GGCGGATGGAGTGCCCGAGA	gttt	tgagacc	GGTACAGTAAGTGAGAATCCTCTCT	GGTCTTGACAAACGTGTGCTTGTAC
PA14_13170	1134999..1135018	yes	TATGAGGACGAATCTCCCGCTTATA	TAGTTGGTGGGTTTCCCTACCGTGT	GGTCTCG	tata	CAGATCGAGCTCGGTTAGCG	gttt	tgagacc	GGTACAGTAAGTGAGAATCCTCTCT	GGTCTTGACAAACGTGTGCTTGTAC
PA14_13190	1135546..1135565	no	TATGAGGACGAATCTCCCGCTTATA	TAGTTGGTGGGTTTCCCTACCGTGT	GGTCTCG	tata	GGGTGGGGCGGGAACGTCCG	gttt	tgagacc	GGTACAGTAAGTGAGAATCCTCTCT	GGTCTTGACAAACGTGTGCTTGTAC
PA14_13200	1137056..1137075	yes	TATGAGGACGAATCTCCCGCTTATA	TAGTTGGTGGGTTTCCCTACCGTGT	GGTCTCG	tata	AACGGTGCGAATCACGGATG	gttt	tgagacc	GGTACAGTAAGTGAGAATCCTCTCT	GGTCTTGACAAACGTGTGCTTGTAC
PA14_13210	1137972..1137991	yes	TATGAGGACGAATCTCCCGCTTATA	TAGTTGGTGGGTTTCCCTACCGTGT	GGTCTCG	tata	TCCATCCGCCCTTGGTCGAA	gttt	tgagacc	GGTACAGTAAGTGAGAATCCTCTCT	GGTCTTGACAAACGTGTGCTTGTAC
PA14_13220	1138572..1138591	yes	TATGAGGACGAATCTCCCGCTTATA	TAGTTGGTGGGTTTCCCTACCGTGT	GGTCTCG	tata	AGACGAAGAGTACGCGCAGT	gttt	tgagacc	GGTACAGTAAGTGAGAATCCTCTCT	GGTCTTGACAAACGTGTGCTTGTAC
PA14_13230	1138830..1138849	yes	TATGAGGACGAATCTCCCGCTTATA	TAGTTGGTGGGTTTCCCTACCGTGT	GGTCTCG	tata	GCGGCCCTGGGAATCGAGAT	gttt	tgagacc	GGTACAGTAAGTGAGAATCCTCTCT	GGTCTTGACAAACGTGTGCTTGTAC
PA14_13240	1139307..1139326	yes	TATGAGGACGAATCTCCCGCTTATA	TAGTTGGTGGGTTTCCCTACCGTGT	GGTCTCG	tata	AACGGGCGAAATACTGCACG	gttt	tgagacc	GGTACAGTAAGTGAGAATCCTCTCT	GGTCTTGACAAACGTGTGCTTGTAC
PA14_13250	1139562..1139581	yes	TATGAGGACGAATCTCCCGCTTATA	TAGTTGGTGGGTTTCCCTACCGTGT	GGTCTCG	tata	AGCGGCCTGCTGGACGCGGA	gttt	tgagacc	GGTACAGTAAGTGAGAATCCTCTCT	GGTCTTGACAAACGTGTGCTTGTAC
PA14_13260	1140117..1140136	yes	TATGAGGACGAATCTCCCGCTTATA	TAGTTGGTGGGTTTCCCTACCGTGT	GGTCTCG	tata	GGAAGGTGGAGGTGGCCAGG	gttt	tgagacc	GGTACAGTAAGTGAGAATCCTCTCT	GGTCTTGACAAACGTGTGCTTGTAC
PA14_13280	1140702..1140721	yes	TATGAGGACGAATCTCCCGCTTATA	TAGTTGGTGGGTTTCCCTACCGTGT	GGTCTCG	tata	TCGGCCAGCGCCTCGTCGAG	gttt	tgagacc	GGTACAGTAAGTGAGAATCCTCTCT	GGTCTTGACAAACGTGTGCTTGTAC
PA14_13290	1142019..1142038	yes	TATGAGGACGAATCTCCCGCTTATA	TAGTTGGTGGGTTTCCCTACCGTGT	GGTCTCG	tata	AAGGCGGGCAGGCTGCCCGC	gttt	tgagacc	GGTACAGTAAGTGAGAATCCTCTCT	GGTCTTGACAAACGTGTGCTTGTAC
PA14_13300	1143022..1143041	yes	TATGAGGACGAATCTCCCGCTTATA	TAGTTGGTGGGTTTCCCTACCGTGT	GGTCTCG	tata	AGTAGAACAGCAGCGGTCCC	gttt	tgagacc	GGTACAGTAAGTGAGAATCCTCTCT	GGTCTTGACAAACGTGTGCTTGTAC
PA14_13320	1143903..1143922	yes	TATGAGGACGAATCTCCCGCTTATA	TAGTTGGTGGGTTTCCCTACCGTGT	GGTCTCG	tata	CGCCGAGGAGCAGGCGTTGG	gttt	tgagacc	GGTACAGTAAGTGAGAATCCTCTCT	GGTCTTGACAAACGTGTGCTTGTAC
PA14_13330	1144676..1144695	yes	TATGAGGACGAATCTCCCGCTTATA	TAGTTGGTGGGTTTCCCTACCGTGT	GGTCTCG	tata	GCACGACGCGGCGGCGCTTG	gttt	tgagacc	GGTACAGTAAGTGAGAATCCTCTCT	GGTCTTGACAAACGTGTGCTTGTAC
PA14_13340	1146266..1146285	yes	TATGAGGACGAATCTCCCGCTTATA	TAGTTGGTGGGTTTCCCTACCGTGT	GGTCTCG	tata	GCAGGGCGGCGTTACGCAAG	gttt	tgagacc	GGTACAGTAAGTGAGAATCCTCTCT	GGTCTTGACAAACGTGTGCTTGTAC
PA14_13350	1149568..1149587	yes	TATGAGGACGAATCTCCCGCTTATA	TAGTTGGTGGGTTTCCCTACCGTGT	GGTCTCG	tata	TCCAGTTCGAGGAGCCGTGC	gttt	tgagacc	GGTACAGTAAGTGAGAATCCTCTCT	GGTCTTGACAAACGTGTGCTTGTAC
PA14_13360	1150378..1150397	yes	TATGAGGACGAATCTCCCGCTTATA	TAGTTGGTGGGTTTCCCTACCGTGT	GGTCTCG	tata	GACCCATGCGGGGCAGCGGT	gttt	tgagacc	GGTACAGTAAGTGAGAATCCTCTCT	GGTCTTGACAAACGTGTGCTTGTAC
PA14_13370	1150765..1150784	yes	TATGAGGACGAATCTCCCGCTTATA	TAGTTGGTGGGTTTCCCTACCGTGT	GGTCTCG	tata	CTGCAGGCGATCCAGTTGGC	gttt	tgagacc	GGTACAGTAAGTGAGAATCCTCTCT	GGTCTTGACAAACGTGTGCTTGTAC
PA14_13380	1151296..1151315	yes	TATGAGGACGAATCTCCCGCTTATA	TAGTTGGTGGGTTTCCCTACCGTGT	GGTCTCG	tata	CCGCGAGCGCCGGCTGGAGC	gttt	tgagacc	GGTACAGTAAGTGAGAATCCTCTCT	GGTCTTGACAAACGTGTGCTTGTAC
PA14_13390	1151681..1151700	yes	TATGAGGACGAATCTCCCGCTTATA	TAGTTGGTGGGTTTCCCTACCGTGT	GGTCTCG	tata	GGATCGCCCAGGCGCGCAGC	gttt	tgagacc	GGTACAGTAAGTGAGAATCCTCTCT	GGTCTTGACAAACGTGTGCTTGTAC
PA14_13410	1153657..1153676	yes	TATGAGGACGAATCTCCCGCTTATA	TAGTTGGTGGGTTTCCCTACCGTGT	GGTCTCG	tata	CGCGACTTCGGCGGCCTGAG	gttt	tgagacc	GGTACAGTAAGTGAGAATCCTCTCT	GGTCTTGACAAACGTGTGCTTGTAC
PA14_13420	1153920..1153939	yes	TATGAGGACGAATCTCCCGCTTATA	TAGTTGGTGGGTTTCCCTACCGTGT	GGTCTCG	tata	CAACGCCAGGGAGAGCAGTC	gttt	tgagacc	GGTACAGTAAGTGAGAATCCTCTCT	GGTCTTGACAAACGTGTGCTTGTAC
PA14_13430	1156792..1156811	yes	TATGAGGACGAATCTCCCGCTTATA	TAGTTGGTGGGTTTCCCTACCGTGT	GGTCTCG	tata	GCGGCGACAGGGCGCGTGAC	gttt	tgagacc	GGTACAGTAAGTGAGAATCCTCTCT	GGTCTTGACAAACGTGTGCTTGTAC
PA14_13450	1157840..1157859	yes	TATGAGGACGAATCTCCCGCTTATA	TAGTTGGTGGGTTTCCCTACCGTGT	GGTCTCG	tata	GCACCTTGGGTGCGGCGGGC	gttt	tgagacc	GGTACAGTAAGTGAGAATCCTCTCT	GGTCTTGACAAACGTGTGCTTGTAC
PA14_13460	1158341..1158360	yes	TATGAGGACGAATCTCCCGCTTATA	TAGTTGGTGGGTTTCCCTACCGTGT	GGTCTCG	tata	CGCGGCCGCATGGGCGAGGT	gttt	tgagacc	GGTACAGTAAGTGAGAATCCTCTCT	GGTCTTGACAAACGTGTGCTTGTAC
PA14_13470	1159328..1159347	yes	TATGAGGACGAATCTCCCGCTTATA	TAGTTGGTGGGTTTCCCTACCGTGT	GGTCTCG	tata	ATACCTGGAAATCGCTGGGT	gttt	tgagacc	GGTACAGTAAGTGAGAATCCTCTCT	GGTCTTGACAAACGTGTGCTTGTAC
PA14_13490	1159501..1159520	yes	TATGAGGACGAATCTCCCGCTTATA	TAGTTGGTGGGTTTCCCTACCGTGT	GGTCTCG	tata	CCCAGATGAGCACGGTGAGC	gttt	tgagacc	GGTACAGTAAGTGAGAATCCTCTCT	GGTCTTGACAAACGTGTGCTTGTAC
PA14_13500	1161327..1161346	yes	TATGAGGACGAATCTCCCGCTTATA	TAGTTGGTGGGTTTCCCTACCGTGT	GGTCTCG	tata	GTTCGAGATGCTCGGGGGCG	gttt	tgagacc	GGTACAGTAAGTGAGAATCCTCTCT	GGTCTTGACAAACGTGTGCTTGTAC
PA14_13510	1162397..1162416	yes	TATGAGGACGAATCTCCCGCTTATA	TAGTTGGTGGGTTTCCCTACCGTGT	GGTCTCG	tata	GAAGGCTCGCATGTTTTGCA	gttt	tgagacc	GGTACAGTAAGTGAGAATCCTCTCT	GGTCTTGACAAACGTGTGCTTGTAC
PA14_13520	1162685..1162704	yes	TATGAGGACGAATCTCCCGCTTATA	TAGTTGGTGGGTTTCCCTACCGTGT	GGTCTCG	tata	AACGACGAGAAAACCGACGA	gttt	tgagacc	GGTACAGTAAGTGAGAATCCTCTCT	GGTCTTGACAAACGTGTGCTTGTAC
PA14_13530	1164170..1164189	yes	TATGAGGACGAATCTCCCGCTTATA	TAGTTGGTGGGTTTCCCTACCGTGT	GGTCTCG	tata	GCAGGGCGAAACCAGCGGAG	gttt	tgagacc	GGTACAGTAAGTGAGAATCCTCTCT	GGTCTTGACAAACGTGTGCTTGTAC
PA14_13560	1166588..1166607	yes	TATGAGGACGAATCTCCCGCTTATA	TAGTTGGTGGGTTTCCCTACCGTGT	GGTCTCG	tata	CAGGCTGATTACGGATTTCA	gttt	tgagacc	GGTACAGTAAGTGAGAATCCTCTCT	GGTCTTGACAAACGTGTGCTTGTAC
PA14_13580	1168730..1168749	yes	TATGAGGACGAATCTCCCGCTTATA	TAGTTGGTGGGTTTCCCTACCGTGT	GGTCTCG	tata	CTTGCCGTTCTTCTGGGTGA	gttt	tgagacc	GGTACAGTAAGTGAGAATCCTCTCT	GGTCTTGACAAACGTGTGCTTGTAC
PA14_13590	1169411..1169430	yes	TATGAGGACGAATCTCCCGCTTATA	TAGTTGGTGGGTTTCCCTACCGTGT	GGTCTCG	tata	GACCTGGGACCAGTCGAGAT	gttt	tgagacc	GGTACAGTAAGTGAGAATCCTCTCT	GGTCTTGACAAACGTGTGCTTGTAC
PA14_13600	1170363..1170382	yes	TATGAGGACGAATCTCCCGCTTATA	TAGTTGGTGGGTTTCCCTACCGTGT	GGTCTCG	tata	GGCAGAGTGAGCGGATCAGT	gttt	tgagacc	GGTACAGTAAGTGAGAATCCTCTCT	GGTCTTGACAAACGTGTGCTTGTAC
PA14_13610	1171080..1171099	yes	TATGAGGACGAATCTCCCGCTTATA	TAGTTGGTGGGTTTCCCTACCGTGT	GGTCTCG	tata	GCCGAGCAGGGCCTTGCCAC	gttt	tgagacc	GGTACAGTAAGTGAGAATCCTCTCT	GGTCTTGACAAACGTGTGCTTGTAC
PA14_13620	1171585..1171604	yes	TATGAGGACGAATCTCCCGCTTATA	TAGTTGGTGGGTTTCCCTACCGTGT	GGTCTCG	tata	GTAGGTGAGCAAGGTGGTCA	gttt	tgagacc	GGTACAGTAAGTGAGAATCCTCTCT	GGTCTTGACAAACGTGTGCTTGTAC
PA14_13630	1173093..1173112	yes	TATGAGGACGAATCTCCCGCTTATA	TAGTTGGTGGGTTTCCCTACCGTGT	GGTCTCG	tata	CCAGCATGGCGGGCCATTGC	gttt	tgagacc	GGTACAGTAAGTGAGAATCCTCTCT	GGTCTTGACAAACGTGTGCTTGTAC
PA14_13650	1174030..1174049	yes	TATGAGGACGAATCTCCCGCTTATA	TAGTTGGTGGGTTTCCCTACCGTGT	GGTCTCG	tata	GCTGAAGCGCGGGGAGGTCG	gttt	tgagacc	GGTACAGTAAGTGAGAATCCTCTCT	GGTCTTGACAAACGTGTGCTTGTAC
PA14_13660	1174796..1174815	yes	TATGAGGACGAATCTCCCGCTTATA	TAGTTGGTGGGTTTCCCTACCGTGT	GGTCTCG	tata	GGAGCCAGGCGAGCGGTGAA	gttt	tgagacc	GGTACAGTAAGTGAGAATCCTCTCT	GGTCTTGACAAACGTGTGCTTGTAC
PA14_13670	1175274..1175293	yes	TATGAGGACGAATCTCCCGCTTATA	TAGTTGGTGGGTTTCCCTACCGTGT	GGTCTCG	tata	AACGGATGGGTACGGCAAGG	gttt	tgagacc	GGTACAGTAAGTGAGAATCCTCTCT	GGTCTTGACAAACGTGTGCTTGTAC
PA14_13680	1176128..1176147	yes	TATGAGGACGAATCTCCCGCTTATA	TAGTTGGTGGGTTTCCCTACCGTGT	GGTCTCG	tata	CGGTGACGAAGGCGACGGGT	gttt	tgagacc	GGTACAGTAAGTGAGAATCCTCTCT	GGTCTTGACAAACGTGTGCTTGTAC
PA14_13690	1176963..1176982	yes	TATGAGGACGAATCTCCCGCTTATA	TAGTTGGTGGGTTTCCCTACCGTGT	GGTCTCG	tata	GCCCTGGTCGAACAGACGGC	gttt	tgagacc	GGTACAGTAAGTGAGAATCCTCTCT	GGTCTTGACAAACGTGTGCTTGTAC
PA14_13710	1177422..1177441	yes	TATGAGGACGAATCTCCCGCTTATA	TAGTTGGTGGGTTTCCCTACCGTGT	GGTCTCG	tata	TCGGACGAGGAGGATGACCC	gttt	tgagacc	GGTACAGTAAGTGAGAATCCTCTCT	GGTCTTGACAAACGTGTGCTTGTAC
PA14_13720	1177994..1178013	yes	TATGAGGACGAATCTCCCGCTTATA	TAGTTGGTGGGTTTCCCTACCGTGT	GGTCTCG	tata	CCAGGGGAAGGGGATCGTCG	gttt	tgagacc	GGTACAGTAAGTGAGAATCCTCTCT	GGTCTTGACAAACGTGTGCTTGTAC
PA14_13730	1178743..1178762	yes	TATGAGGACGAATCTCCCGCTTATA	TAGTTGGTGGGTTTCCCTACCGTGT	GGTCTCG	tata	ACCGGTTCGTCGGCGGTGGC	gttt	tgagacc	GGTACAGTAAGTGAGAATCCTCTCT	GGTCTTGACAAACGTGTGCTTGTAC
PA14_13740	1180607..1180626	yes	TATGAGGACGAATCTCCCGCTTATA	TAGTTGGTGGGTTTCCCTACCGTGT	GGTCTCG	tata	CCGCTGGTCAGCGTCCGGCG	gttt	tgagacc	GGTACAGTAAGTGAGAATCCTCTCT	GGTCTTGACAAACGTGTGCTTGTAC
PA14_13750	1180827..1180846	yes	TATGAGGACGAATCTCCCGCTTATA	TAGTTGGTGGGTTTCCCTACCGTGT	GGTCTCG	tata	GGAGTACTGTTTCTGACGTA	gttt	tgagacc	GGTACAGTAAGTGAGAATCCTCTCT	GGTCTTGACAAACGTGTGCTTGTAC
PA14_13770	1182141..1182160	yes	TATGAGGACGAATCTCCCGCTTATA	TAGTTGGTGGGTTTCCCTACCGTGT	GGTCTCG	tata	TGCGGCTTTCAGTTGGGTAT	gttt	tgagacc	GGTACAGTAAGTGAGAATCCTCTCT	GGTCTTGACAAACGTGTGCTTGTAC
PA14_13780	1183627..1183646	yes	TATGAGGACGAATCTCCCGCTTATA	TAGTTGGTGGGTTTCCCTACCGTGT	GGTCTCG	tata	TCTTCTTGAAGAACTGCAGG	gttt	tgagacc	GGTACAGTAAGTGAGAATCCTCTCT	GGTCTTGACAAACGTGTGCTTGTAC
PA14_13800	1187442..1187461	yes	TATGAGGACGAATCTCCCGCTTATA	TAGTTGGTGGGTTTCCCTACCGTGT	GGTCTCG	tata	GGCAACCAATGCACTTGTCG	gttt	tgagacc	GGTACAGTAAGTGAGAATCCTCTCT	GGTCTTGACAAACGTGTGCTTGTAC
PA14_13810	1188977..1188996	yes	TATGAGGACGAATCTCCCGCTTATA	TAGTTGGTGGGTTTCCCTACCGTGT	GGTCTCG	tata	CGAGCAGCAGGGCGAGCAGG	gttt	tgagacc	GGTACAGTAAGTGAGAATCCTCTCT	GGTCTTGACAAACGTGTGCTTGTAC
PA14_13830	1189704..1189723	yes	TATGAGGACGAATCTCCCGCTTATA	TAGTTGGTGGGTTTCCCTACCGTGT	GGTCTCG	tata	GATCCCGAAGAACAGAAGAT	gttt	tgagacc	GGTACAGTAAGTGAGAATCCTCTCT	GGTCTTGACAAACGTGTGCTTGTAC
PA14_13840	1190445..1190464	yes	TATGAGGACGAATCTCCCGCTTATA	TAGTTGGTGGGTTTCCCTACCGTGT	GGTCTCG	tata	CTCGACGCGTTCTTCGTAGT	gttt	tgagacc	GGTACAGTAAGTGAGAATCCTCTCT	GGTCTTGACAAACGTGTGCTTGTAC
PA14_13850	1191330..1191349	yes	TATGAGGACGAATCTCCCGCTTATA	TAGTTGGTGGGTTTCCCTACCGTGT	GGTCTCG	tata	GGTAGTCGATCTGTCGGCCT	gttt	tgagacc	GGTACAGTAAGTGAGAATCCTCTCT	GGTCTTGACAAACGTGTGCTTGTAC
PA14_13860	1192453..1192472	yes	TATGAGGACGAATCTCCCGCTTATA	TAGTTGGTGGGTTTCCCTACCGTGT	GGTCTCG	tata	GCTTGCAGTCGAAAACCGGC	gttt	tgagacc	GGTACAGTAAGTGAGAATCCTCTCT	GGTCTTGACAAACGTGTGCTTGTAC
PA14_13870	1192974..1192993	yes	TATGAGGACGAATCTCCCGCTTATA	TAGTTGGTGGGTTTCCCTACCGTGT	GGTCTCG	tata	CTTGATGTTGTGCTTCTCGA	gttt	tgagacc	GGTACAGTAAGTGAGAATCCTCTCT	GGTCTTGACAAACGTGTGCTTGTAC
PA14_13880	1193105..1193124	yes	TATGAGGACGAATCTCCCGCTTATA	TAGTTGGTGGGTTTCCCTACCGTGT	GGTCTCG	tata	GGCCTTCGAAGATGGCGCCG	gttt	tgagacc	GGTACAGTAAGTGAGAATCCTCTCT	GGTCTTGACAAACGTGTGCTTGTAC
PA14_13890	1194156..1194175	yes	TATGAGGACGAATCTCCCGCTTATA	TAGTTGGTGGGTTTCCCTACCGTGT	GGTCTCG	tata	CCTGGTAGGCCACACCGCTG	gttt	tgagacc	GGTACAGTAAGTGAGAATCCTCTCT	GGTCTTGACAAACGTGTGCTTGTAC
PA14_13900	1195119..1195138	yes	TATGAGGACGAATCTCCCGCTTATA	TAGTTGGTGGGTTTCCCTACCGTGT	GGTCTCG	tata	CCTTGATCGAGCGGCCAAGC	gttt	tgagacc	GGTACAGTAAGTGAGAATCCTCTCT	GGTCTTGACAAACGTGTGCTTGTAC
PA14_13910	1195284..1195303	yes	TATGAGGACGAATCTCCCGCTTATA	TAGTTGGTGGGTTTCCCTACCGTGT	GGTCTCG	tata	GTCCAGTAGTTGATCGTCGG	gttt	tgagacc	GGTACAGTAAGTGAGAATCCTCTCT	GGTCTTGACAAACGTGTGCTTGTAC
PA14_13920	1195478..1195497	yes	TATGAGGACGAATCTCCCGCTTATA	TAGTTGGTGGGTTTCCCTACCGTGT	GGTCTCG	tata	TTGCGGTATCGCTCCGTTCG	gttt	tgagacc	GGTACAGTAAGTGAGAATCCTCTCT	GGTCTTGACAAACGTGTGCTTGTAC
PA14_13940	1196774..1196793	yes	TATGAGGACGAATCTCCCGCTTATA	TAGTTGGTGGGTTTCCCTACCGTGT	GGTCTCG	tata	CAGCGCTGCTTCGGTCTGCT	gttt	tgagacc	GGTACAGTAAGTGAGAATCCTCTCT	GGTCTTGACAAACGTGTGCTTGTAC
PA14_13950	1197936..1197955	yes	TATGAGGACGAATCTCCCGCTTATA	TAGTTGGTGGGTTTCCCTACCGTGT	GGTCTCG	tata	TCAACTATTTCGACAGAGTT	gttt	tgagacc	GGTACAGTAAGTGAGAATCCTCTCT	GGTCTTGACAAACGTGTGCTTGTAC
PA14_13960	1198377..1198396	yes	TATGAGGACGAATCTCCCGCTTATA	TAGTTGGTGGGTTTCCCTACCGTGT	GGTCTCG	tata	GCCCCCGGCGAATTTGAAAG	gttt	tgagacc	GGTACAGTAAGTGAGAATCCTCTCT	GGTCTTGACAAACGTGTGCTTGTAC
PA14_13970	1198622..1198641	yes	TATGAGGACGAATCTCCCGCTTATA	TAGTTGGTGGGTTTCCCTACCGTGT	GGTCTCG	tata	TGGACTGCAAGCCCACCGCA	gttt	tgagacc	GGTACAGTAAGTGAGAATCCTCTCT	GGTCTTGACAAACGTGTGCTTGTAC
PA14_13990	1199264..1199283	yes	TATGAGGACGAATCTCCCGCTTATA	TAGTTGGTGGGTTTCCCTACCGTGT	GGTCTCG	tata	CAGGCCTCCCAGCAGGTTCT	gttt	tgagacc	GGTACAGTAAGTGAGAATCCTCTCT	GGTCTTGACAAACGTGTGCTTGTAC
PA14_14000	1200662..1200681	yes	TATGAGGACGAATCTCCCGCTTATA	TAGTTGGTGGGTTTCCCTACCGTGT	GGTCTCG	tata	CCAGGCTGGGGTCTTGGCTC	gttt	tgagacc	GGTACAGTAAGTGAGAATCCTCTCT	GGTCTTGACAAACGTGTGCTTGTAC
PA14_14010	1201840..1201859	yes	TATGAGGACGAATCTCCCGCTTATA	TAGTTGGTGGGTTTCCCTACCGTGT	GGTCTCG	tata	CGATGCCGGCACCGATGACG	gttt	tgagacc	GGTACAGTAAGTGAGAATCCTCTCT	GGTCTTGACAAACGTGTGCTTGTAC
PA14_14020	1202820..1202839	yes	TATGAGGACGAATCTCCCGCTTATA	TAGTTGGTGGGTTTCCCTACCGTGT	GGTCTCG	tata	CTGGACGATCAGGGGAGTGG	gttt	tgagacc	GGTACAGTAAGTGAGAATCCTCTCT	GGTCTTGACAAACGTGTGCTTGTAC
PA14_14040	1204477..1204496	yes	TATGAGGACGAATCTCCCGCTTATA	TAGTTGGTGGGTTTCCCTACCGTGT	GGTCTCG	tata	GCTCTGCGGCTGGGTTCCGT	gttt	tgagacc	GGTACAGTAAGTGAGAATCCTCTCT	GGTCTTGACAAACGTGTGCTTGTAC
PA14_14060	1204826..1204845	yes	TATGAGGACGAATCTCCCGCTTATA	TAGTTGGTGGGTTTCCCTACCGTGT	GGTCTCG	tata	AGCCCGGCGATCGATGGGGA	gttt	tgagacc	GGTACAGTAAGTGAGAATCCTCTCT	GGTCTTGACAAACGTGTGCTTGTAC
PA14_14080	1207347..1207366	yes	TATGAGGACGAATCTCCCGCTTATA	TAGTTGGTGGGTTTCCCTACCGTGT	GGTCTCG	tata	TTCGGGGCATCGAGGATCAG	gttt	tgagacc	GGTACAGTAAGTGAGAATCCTCTCT	GGTCTTGACAAACGTGTGCTTGTAC
PA14_14100	1207696..1207715	yes	TATGAGGACGAATCTCCCGCTTATA	TAGTTGGTGGGTTTCCCTACCGTGT	GGTCTCG	tata	GCTGGCGCCGAGGCAGACGG	gttt	tgagacc	GGTACAGTAAGTGAGAATCCTCTCT	GGTCTTGACAAACGTGTGCTTGTAC
PA14_14110	1208804..1208823	no	TATGAGGACGAATCTCCCGCTTATA	TAGTTGGTGGGTTTCCCTACCGTGT	GGTCTCG	tata	GGAGTCATCGATAGGTTCAC	gttt	tgagacc	GGTACAGTAAGTGAGAATCCTCTCT	GGTCTTGACAAACGTGTGCTTGTAC
PA14_14130	1209592..1209611	yes	TATGAGGACGAATCTCCCGCTTATA	TAGTTGGTGGGTTTCCCTACCGTGT	GGTCTCG	tata	GATCAGTTCGGCGTTGGGGT	gttt	tgagacc	GGTACAGTAAGTGAGAATCCTCTCT	GGTCTTGACAAACGTGTGCTTGTAC
PA14_14140	1210151..1210170	yes	TATGAGGACGAATCTCCCGCTTATA	TAGTTGGTGGGTTTCCCTACCGTGT	GGTCTCG	tata	CGTTGAATGCGGCGGGGAAC	gttt	tgagacc	GGTACAGTAAGTGAGAATCCTCTCT	GGTCTTGACAAACGTGTGCTTGTAC
PA14_14150	1210847..1210866	yes	TATGAGGACGAATCTCCCGCTTATA	TAGTTGGTGGGTTTCCCTACCGTGT	GGTCTCG	tata	CTTCCCGATCGCCGCCGTGG	gttt	tgagacc	GGTACAGTAAGTGAGAATCCTCTCT	GGTCTTGACAAACGTGTGCTTGTAC
PA14_14160	1211182..1211201	yes	TATGAGGACGAATCTCCCGCTTATA	TAGTTGGTGGGTTTCCCTACCGTGT	GGTCTCG	tata	GTTTCCACCAATGATTCTTC	gttt	tgagacc	GGTACAGTAAGTGAGAATCCTCTCT	GGTCTTGACAAACGTGTGCTTGTAC
PA14_14170	1211998..1212017	yes	TATGAGGACGAATCTCCCGCTTATA	TAGTTGGTGGGTTTCCCTACCGTGT	GGTCTCG	tata	GCGAAGTGGGATAGTGATGC	gttt	tgagacc	GGTACAGTAAGTGAGAATCCTCTCT	GGTCTTGACAAACGTGTGCTTGTAC
PA14_14200	1212936..1212955	yes	TATGAGGACGAATCTCCCGCTTATA	TAGTTGGTGGGTTTCCCTACCGTGT	GGTCTCG	tata	GGCGTCCGGGCGCGGCGACG	gttt	tgagacc	GGTACAGTAAGTGAGAATCCTCTCT	GGTCTTGACAAACGTGTGCTTGTAC
PA14_14210	1213771..1213790	yes	TATGAGGACGAATCTCCCGCTTATA	TAGTTGGTGGGTTTCCCTACCGTGT	GGTCTCG	tata	GTTGACGATTTCGATGTCGT	gttt	tgagacc	GGTACAGTAAGTGAGAATCCTCTCT	GGTCTTGACAAACGTGTGCTTGTAC
PA14_14220	1215694..1215713	yes	TATGAGGACGAATCTCCCGCTTATA	TAGTTGGTGGGTTTCCCTACCGTGT	GGTCTCG	tata	TGGACGATGGCGTGATGGAT	gttt	tgagacc	GGTACAGTAAGTGAGAATCCTCTCT	GGTCTTGACAAACGTGTGCTTGTAC
PA14_14230	1217128..1217147	yes	TATGAGGACGAATCTCCCGCTTATA	TAGTTGGTGGGTTTCCCTACCGTGT	GGTCTCG	tata	GGATGGCGAGGTCCTTGAGC	gttt	tgagacc	GGTACAGTAAGTGAGAATCCTCTCT	GGTCTTGACAAACGTGTGCTTGTAC
PA14_14250	1217678..1217697	yes	TATGAGGACGAATCTCCCGCTTATA	TAGTTGGTGGGTTTCCCTACCGTGT	GGTCTCG	tata	GCAGGCGCGATTCGAAATGC	gttt	tgagacc	GGTACAGTAAGTGAGAATCCTCTCT	GGTCTTGACAAACGTGTGCTTGTAC
PA14_14270	1217826..1217845	yes	TATGAGGACGAATCTCCCGCTTATA	TAGTTGGTGGGTTTCCCTACCGTGT	GGTCTCG	tata	GCAGGGTCGAGGTTGCGGCG	gttt	tgagacc	GGTACAGTAAGTGAGAATCCTCTCT	GGTCTTGACAAACGTGTGCTTGTAC
PA14_14280	1219213..1219232	yes	TATGAGGACGAATCTCCCGCTTATA	TAGTTGGTGGGTTTCCCTACCGTGT	GGTCTCG	tata	GCAGCGCGGTGAGGGGAGGG	gttt	tgagacc	GGTACAGTAAGTGAGAATCCTCTCT	GGTCTTGACAAACGTGTGCTTGTAC
PA14_14290	1219397..1219416	yes	TATGAGGACGAATCTCCCGCTTATA	TAGTTGGTGGGTTTCCCTACCGTGT	GGTCTCG	tata	ATGGCGACCCGGCGCACAAA	gttt	tgagacc	GGTACAGTAAGTGAGAATCCTCTCT	GGTCTTGACAAACGTGTGCTTGTAC
PA14_14300,PA14_14310	1221235..1221254	yes	TATGAGGACGAATCTCCCGCTTATA	TAGTTGGTGGGTTTCCCTACCGTGT	GGTCTCG	tata	CGCTTCGTTGCGCTTGTAGT	gttt	tgagacc	GGTACAGTAAGTGAGAATCCTCTCT	GGTCTTGACAAACGTGTGCTTGTAC
PA14_14310	1221468..1221487	yes	TATGAGGACGAATCTCCCGCTTATA	TAGTTGGTGGGTTTCCCTACCGTGT	GGTCTCG	tata	GGGCTTTGAATGTTTCGAGC	gttt	tgagacc	GGTACAGTAAGTGAGAATCCTCTCT	GGTCTTGACAAACGTGTGCTTGTAC
PA14_14320	1221595..1221614	yes	TATGAGGACGAATCTCCCGCTTATA	TAGTTGGTGGGTTTCCCTACCGTGT	GGTCTCG	tata	GGAACGGCGGGAACGCCGGA	gttt	tgagacc	GGTACAGTAAGTGAGAATCCTCTCT	GGTCTTGACAAACGTGTGCTTGTAC
PA14_14330	1222796..1222815	yes	TATGAGGACGAATCTCCCGCTTATA	TAGTTGGTGGGTTTCCCTACCGTGT	GGTCTCG	tata	TGGATGGCGGCGCGGTAGAG	gttt	tgagacc	GGTACAGTAAGTGAGAATCCTCTCT	GGTCTTGACAAACGTGTGCTTGTAC
PA14_14340	1223997..1224016	yes	TATGAGGACGAATCTCCCGCTTATA	TAGTTGGTGGGTTTCCCTACCGTGT	GGTCTCG	tata	GGATGCGGGCTGGTCGGGCG	gttt	tgagacc	GGTACAGTAAGTGAGAATCCTCTCT	GGTCTTGACAAACGTGTGCTTGTAC
PA14_14360	1225919..1225938	yes	TATGAGGACGAATCTCCCGCTTATA	TAGTTGGTGGGTTTCCCTACCGTGT	GGTCTCG	tata	CGACCACCCAGAGCAGTTCG	gttt	tgagacc	GGTACAGTAAGTGAGAATCCTCTCT	GGTCTTGACAAACGTGTGCTTGTAC
PA14_14370	1226820..1226839	yes	TATGAGGACGAATCTCCCGCTTATA	TAGTTGGTGGGTTTCCCTACCGTGT	GGTCTCG	tata	CGGGGTTGAAGGTGATCTTC	gttt	tgagacc	GGTACAGTAAGTGAGAATCCTCTCT	GGTCTTGACAAACGTGTGCTTGTAC
PA14_14380	1227716..1227735	yes	TATGAGGACGAATCTCCCGCTTATA	TAGTTGGTGGGTTTCCCTACCGTGT	GGTCTCG	tata	CGATCTCCAGGGCACCGAAC	gttt	tgagacc	GGTACAGTAAGTGAGAATCCTCTCT	GGTCTTGACAAACGTGTGCTTGTAC
PA14_14390	1228781..1228800	yes	TATGAGGACGAATCTCCCGCTTATA	TAGTTGGTGGGTTTCCCTACCGTGT	GGTCTCG	tata	GGGCAACCATTTATTCTTAT	gttt	tgagacc	GGTACAGTAAGTGAGAATCCTCTCT	GGTCTTGACAAACGTGTGCTTGTAC
PA14_14400	1228953..1228972	no	TATGAGGACGAATCTCCCGCTTATA	TAGTTGGTGGGTTTCCCTACCGTGT	GGTCTCG	tata	CCCCTTGCCCGCCCCCCCAG	gttt	tgagacc	GGTACAGTAAGTGAGAATCCTCTCT	GGTCTTGACAAACGTGTGCTTGTAC
PA14_14420	1229221..1229240	yes	TATGAGGACGAATCTCCCGCTTATA	TAGTTGGTGGGTTTCCCTACCGTGT	GGTCTCG	tata	GACCATGAGACAGATCGCCA	gttt	tgagacc	GGTACAGTAAGTGAGAATCCTCTCT	GGTCTTGACAAACGTGTGCTTGTAC
PA14_14430	1231241..1231260	yes	TATGAGGACGAATCTCCCGCTTATA	TAGTTGGTGGGTTTCCCTACCGTGT	GGTCTCG	tata	GACTTTCTTGTCGATGGCGT	gttt	tgagacc	GGTACAGTAAGTGAGAATCCTCTCT	GGTCTTGACAAACGTGTGCTTGTAC
PA14_14440	1234397..1234416	yes	TATGAGGACGAATCTCCCGCTTATA	TAGTTGGTGGGTTTCCCTACCGTGT	GGTCTCG	tata	AAGTCTCGATGGCGTGCGGC	gttt	tgagacc	GGTACAGTAAGTGAGAATCCTCTCT	GGTCTTGACAAACGTGTGCTTGTAC
PA14_14450	1234892..1234911	yes	TATGAGGACGAATCTCCCGCTTATA	TAGTTGGTGGGTTTCCCTACCGTGT	GGTCTCG	tata	CCGGGGGTTGTGTCGGTTTG	gttt	tgagacc	GGTACAGTAAGTGAGAATCCTCTCT	GGTCTTGACAAACGTGTGCTTGTAC
PA14_14460	1235336..1235355	yes	TATGAGGACGAATCTCCCGCTTATA	TAGTTGGTGGGTTTCCCTACCGTGT	GGTCTCG	tata	GATCACGTAGAAATCGACCC	gttt	tgagacc	GGTACAGTAAGTGAGAATCCTCTCT	GGTCTTGACAAACGTGTGCTTGTAC
PA14_14470	1236816..1236835	yes	TATGAGGACGAATCTCCCGCTTATA	TAGTTGGTGGGTTTCCCTACCGTGT	GGTCTCG	tata	CCGGGCGTACGCTTTTAACA	gttt	tgagacc	GGTACAGTAAGTGAGAATCCTCTCT	GGTCTTGACAAACGTGTGCTTGTAC
PA14_14480	1237189..1237208	yes	TATGAGGACGAATCTCCCGCTTATA	TAGTTGGTGGGTTTCCCTACCGTGT	GGTCTCG	tata	TCCGCGACAGGTTTGCTGGC	gttt	tgagacc	GGTACAGTAAGTGAGAATCCTCTCT	GGTCTTGACAAACGTGTGCTTGTAC
PA14_14490	1238105..1238124	yes	TATGAGGACGAATCTCCCGCTTATA	TAGTTGGTGGGTTTCCCTACCGTGT	GGTCTCG	tata	GCAGGGCGACACCCTCGGAG	gttt	tgagacc	GGTACAGTAAGTGAGAATCCTCTCT	GGTCTTGACAAACGTGTGCTTGTAC
PA14_14500	1239209..1239228	yes	TATGAGGACGAATCTCCCGCTTATA	TAGTTGGTGGGTTTCCCTACCGTGT	GGTCTCG	tata	GCACTTCACGGGACAAATAA	gttt	tgagacc	GGTACAGTAAGTGAGAATCCTCTCT	GGTCTTGACAAACGTGTGCTTGTAC
PA14_14510	1240340..1240359	yes	TATGAGGACGAATCTCCCGCTTATA	TAGTTGGTGGGTTTCCCTACCGTGT	GGTCTCG	tata	CGCGAGGATCGCGACGAAGA	gttt	tgagacc	GGTACAGTAAGTGAGAATCCTCTCT	GGTCTTGACAAACGTGTGCTTGTAC
PA14_14520	1241977..1241996	yes	TATGAGGACGAATCTCCCGCTTATA	TAGTTGGTGGGTTTCCCTACCGTGT	GGTCTCG	tata	TGGGGAGAAAGCATGTGTTT	gttt	tgagacc	GGTACAGTAAGTGAGAATCCTCTCT	GGTCTTGACAAACGTGTGCTTGTAC
PA14_14530	1242144..1242163	yes	TATGAGGACGAATCTCCCGCTTATA	TAGTTGGTGGGTTTCCCTACCGTGT	GGTCTCG	tata	TTTCTCCTGGCTCGCTTCAC	gttt	tgagacc	GGTACAGTAAGTGAGAATCCTCTCT	GGTCTTGACAAACGTGTGCTTGTAC
PA14_14540	1243986..1244005	yes	TATGAGGACGAATCTCCCGCTTATA	TAGTTGGTGGGTTTCCCTACCGTGT	GGTCTCG	tata	TTCCGTGAAAAGGCCCATTC	gttt	tgagacc	GGTACAGTAAGTGAGAATCCTCTCT	GGTCTTGACAAACGTGTGCTTGTAC
PA14_14540,PA14_14550	1244103..1244122	yes	TATGAGGACGAATCTCCCGCTTATA	TAGTTGGTGGGTTTCCCTACCGTGT	GGTCTCG	tata	TTTGAGTCGCATAACAGGGG	gttt	tgagacc	GGTACAGTAAGTGAGAATCCTCTCT	GGTCTTGACAAACGTGTGCTTGTAC
PA14_14560	1244613..1244632	yes	TATGAGGACGAATCTCCCGCTTATA	TAGTTGGTGGGTTTCCCTACCGTGT	GGTCTCG	tata	GGTTGTCCGGTAGCTTTCTG	gttt	tgagacc	GGTACAGTAAGTGAGAATCCTCTCT	GGTCTTGACAAACGTGTGCTTGTAC
PA14_14570	1244803..1244822	yes	TATGAGGACGAATCTCCCGCTTATA	TAGTTGGTGGGTTTCCCTACCGTGT	GGTCTCG	tata	GTCTACCGATTCCGCCACCG	gttt	tgagacc	GGTACAGTAAGTGAGAATCCTCTCT	GGTCTTGACAAACGTGTGCTTGTAC
PA14_14590	1244942..1244961	yes	TATGAGGACGAATCTCCCGCTTATA	TAGTTGGTGGGTTTCCCTACCGTGT	GGTCTCG	tata	GGGCAAGTCGAAATGAAAAT	gttt	tgagacc	GGTACAGTAAGTGAGAATCCTCTCT	GGTCTTGACAAACGTGTGCTTGTAC
PA14_14600	1246010..1246029	yes	TATGAGGACGAATCTCCCGCTTATA	TAGTTGGTGGGTTTCCCTACCGTGT	GGTCTCG	tata	GCCGCGACGGGCCTTGCCGT	gttt	tgagacc	GGTACAGTAAGTGAGAATCCTCTCT	GGTCTTGACAAACGTGTGCTTGTAC
PA14_14610	1247165..1247184	yes	TATGAGGACGAATCTCCCGCTTATA	TAGTTGGTGGGTTTCCCTACCGTGT	GGTCTCG	tata	GCTGCGTCGGCGTAGGCAGC	gttt	tgagacc	GGTACAGTAAGTGAGAATCCTCTCT	GGTCTTGACAAACGTGTGCTTGTAC
PA14_14630	1247563..1247582	yes	TATGAGGACGAATCTCCCGCTTATA	TAGTTGGTGGGTTTCCCTACCGTGT	GGTCTCG	tata	ATCAGCAGATATTTCCACAG	gttt	tgagacc	GGTACAGTAAGTGAGAATCCTCTCT	GGTCTTGACAAACGTGTGCTTGTAC
PA14_14650	1249440..1249459	yes	TATGAGGACGAATCTCCCGCTTATA	TAGTTGGTGGGTTTCCCTACCGTGT	GGTCTCG	tata	GCGGATGCCCATGAAGTTGA	gttt	tgagacc	GGTACAGTAAGTGAGAATCCTCTCT	GGTCTTGACAAACGTGTGCTTGTAC
PA14_14660	1250550..1250569	yes	TATGAGGACGAATCTCCCGCTTATA	TAGTTGGTGGGTTTCCCTACCGTGT	GGTCTCG	tata	CACGCCTACGGCACCCAGAA	gttt	tgagacc	GGTACAGTAAGTGAGAATCCTCTCT	GGTCTTGACAAACGTGTGCTTGTAC
PA14_14680	1251962..1251981	yes	TATGAGGACGAATCTCCCGCTTATA	TAGTTGGTGGGTTTCCCTACCGTGT	GGTCTCG	tata	CGCAGGGCGATATTCAGCAT	gttt	tgagacc	GGTACAGTAAGTGAGAATCCTCTCT	GGTCTTGACAAACGTGTGCTTGTAC
PA14_14690	1252153..1252172	yes	TATGAGGACGAATCTCCCGCTTATA	TAGTTGGTGGGTTTCCCTACCGTGT	GGTCTCG	tata	TGACCAACACCACACGAATA	gttt	tgagacc	GGTACAGTAAGTGAGAATCCTCTCT	GGTCTTGACAAACGTGTGCTTGTAC
PA14_14700	1252944..1252963	yes	TATGAGGACGAATCTCCCGCTTATA	TAGTTGGTGGGTTTCCCTACCGTGT	GGTCTCG	tata	GATCACGGTGGAATACGCTT	gttt	tgagacc	GGTACAGTAAGTGAGAATCCTCTCT	GGTCTTGACAAACGTGTGCTTGTAC
PA14_14710	1253849..1253868	yes	TATGAGGACGAATCTCCCGCTTATA	TAGTTGGTGGGTTTCCCTACCGTGT	GGTCTCG	tata	TACGGCGTAGCGGCCTTTGG	gttt	tgagacc	GGTACAGTAAGTGAGAATCCTCTCT	GGTCTTGACAAACGTGTGCTTGTAC
PA14_14730	1254369..1254388	yes	TATGAGGACGAATCTCCCGCTTATA	TAGTTGGTGGGTTTCCCTACCGTGT	GGTCTCG	tata	GCGGAGTAATCGAGGTAGAT	gttt	tgagacc	GGTACAGTAAGTGAGAATCCTCTCT	GGTCTTGACAAACGTGTGCTTGTAC
PA14_14740	1255636..1255655	yes	TATGAGGACGAATCTCCCGCTTATA	TAGTTGGTGGGTTTCCCTACCGTGT	GGTCTCG	tata	CGTTGCGCGGGTTTTCGTAG	gttt	tgagacc	GGTACAGTAAGTGAGAATCCTCTCT	GGTCTTGACAAACGTGTGCTTGTAC
PA14_14750	1256028..1256047	yes	TATGAGGACGAATCTCCCGCTTATA	TAGTTGGTGGGTTTCCCTACCGTGT	GGTCTCG	tata	GGCGGCTTCGGTCATGCTGA	gttt	tgagacc	GGTACAGTAAGTGAGAATCCTCTCT	GGTCTTGACAAACGTGTGCTTGTAC
PA14_14770	1256364..1256383	yes	TATGAGGACGAATCTCCCGCTTATA	TAGTTGGTGGGTTTCCCTACCGTGT	GGTCTCG	tata	TCGAACTGGGCGAAATGACA	gttt	tgagacc	GGTACAGTAAGTGAGAATCCTCTCT	GGTCTTGACAAACGTGTGCTTGTAC
PA14_14780	1256923..1256942	yes	TATGAGGACGAATCTCCCGCTTATA	TAGTTGGTGGGTTTCCCTACCGTGT	GGTCTCG	tata	GGGCTCGGCGATCTGCAGTA	gttt	tgagacc	GGTACAGTAAGTGAGAATCCTCTCT	GGTCTTGACAAACGTGTGCTTGTAC
PA14_14800	1258788..1258807	yes	TATGAGGACGAATCTCCCGCTTATA	TAGTTGGTGGGTTTCCCTACCGTGT	GGTCTCG	tata	TGGGGCAGAATCACGATCTG	gttt	tgagacc	GGTACAGTAAGTGAGAATCCTCTCT	GGTCTTGACAAACGTGTGCTTGTAC
PA14_14810	1259154..1259173	yes	TATGAGGACGAATCTCCCGCTTATA	TAGTTGGTGGGTTTCCCTACCGTGT	GGTCTCG	tata	CCAGCACATCGGTCCATTTC	gttt	tgagacc	GGTACAGTAAGTGAGAATCCTCTCT	GGTCTTGACAAACGTGTGCTTGTAC
PA14_14820	1259609..1259628	yes	TATGAGGACGAATCTCCCGCTTATA	TAGTTGGTGGGTTTCCCTACCGTGT	GGTCTCG	tata	GTCCGGCTTGATGATGGACA	gttt	tgagacc	GGTACAGTAAGTGAGAATCCTCTCT	GGTCTTGACAAACGTGTGCTTGTAC
PA14_14830	1260059..1260078	yes	TATGAGGACGAATCTCCCGCTTATA	TAGTTGGTGGGTTTCCCTACCGTGT	GGTCTCG	tata	CAGGTTCACCTTGCCGGCGG	gttt	tgagacc	GGTACAGTAAGTGAGAATCCTCTCT	GGTCTTGACAAACGTGTGCTTGTAC
PA14_14850	1261281..1261300	yes	TATGAGGACGAATCTCCCGCTTATA	TAGTTGGTGGGTTTCCCTACCGTGT	GGTCTCG	tata	CGGCCCTTGTCGGTTTTCAG	gttt	tgagacc	GGTACAGTAAGTGAGAATCCTCTCT	GGTCTTGACAAACGTGTGCTTGTAC
PA14_14860	1261973..1261992	yes	TATGAGGACGAATCTCCCGCTTATA	TAGTTGGTGGGTTTCCCTACCGTGT	GGTCTCG	tata	GTGGCTACGACTTCGGGCTG	gttt	tgagacc	GGTACAGTAAGTGAGAATCCTCTCT	GGTCTTGACAAACGTGTGCTTGTAC
PA14_14880	1263022..1263041	yes	TATGAGGACGAATCTCCCGCTTATA	TAGTTGGTGGGTTTCCCTACCGTGT	GGTCTCG	tata	CGAGACTTGCGGCGAATGAT	gttt	tgagacc	GGTACAGTAAGTGAGAATCCTCTCT	GGTCTTGACAAACGTGTGCTTGTAC
PA14_14890	1264145..1264164	yes	TATGAGGACGAATCTCCCGCTTATA	TAGTTGGTGGGTTTCCCTACCGTGT	GGTCTCG	tata	CATGCCACGAATGGCTTGCA	gttt	tgagacc	GGTACAGTAAGTGAGAATCCTCTCT	GGTCTTGACAAACGTGTGCTTGTAC
PA14_14900	1265464..1265483	yes	TATGAGGACGAATCTCCCGCTTATA	TAGTTGGTGGGTTTCCCTACCGTGT	GGTCTCG	tata	CTGCGCCAGGTCTTCGTCTT	gttt	tgagacc	GGTACAGTAAGTGAGAATCCTCTCT	GGTCTTGACAAACGTGTGCTTGTAC
PA14_14910	1266134..1266153	yes	TATGAGGACGAATCTCCCGCTTATA	TAGTTGGTGGGTTTCCCTACCGTGT	GGTCTCG	tata	GCTGCAACCCACGACCGCCA	gttt	tgagacc	GGTACAGTAAGTGAGAATCCTCTCT	GGTCTTGACAAACGTGTGCTTGTAC
PA14_14930	1267323..1267342	yes	TATGAGGACGAATCTCCCGCTTATA	TAGTTGGTGGGTTTCCCTACCGTGT	GGTCTCG	tata	CGACCCACCAGGGCAATAAC	gttt	tgagacc	GGTACAGTAAGTGAGAATCCTCTCT	GGTCTTGACAAACGTGTGCTTGTAC
PA14_14940	1269113..1269132	yes	TATGAGGACGAATCTCCCGCTTATA	TAGTTGGTGGGTTTCCCTACCGTGT	GGTCTCG	tata	AAGATGGTGGTGCCGACATT	gttt	tgagacc	GGTACAGTAAGTGAGAATCCTCTCT	GGTCTTGACAAACGTGTGCTTGTAC
PA14_14960	1270252..1270271	yes	TATGAGGACGAATCTCCCGCTTATA	TAGTTGGTGGGTTTCCCTACCGTGT	GGTCTCG	tata	ACCAGGGCGATGTCCAGGTC	gttt	tgagacc	GGTACAGTAAGTGAGAATCCTCTCT	GGTCTTGACAAACGTGTGCTTGTAC
PA14_14975	1271228..1271247	yes	TATGAGGACGAATCTCCCGCTTATA	TAGTTGGTGGGTTTCCCTACCGTGT	GGTCTCG	tata	CCGATCAACAGGGCCACTTT	gttt	tgagacc	GGTACAGTAAGTGAGAATCCTCTCT	GGTCTTGACAAACGTGTGCTTGTAC
PA14_14990	1272756..1272775	yes	TATGAGGACGAATCTCCCGCTTATA	TAGTTGGTGGGTTTCCCTACCGTGT	GGTCTCG	tata	AGAGTTGCCGAGTTTGCGTG	gttt	tgagacc	GGTACAGTAAGTGAGAATCCTCTCT	GGTCTTGACAAACGTGTGCTTGTAC
PA14_15000	1272979..1272998	yes	TATGAGGACGAATCTCCCGCTTATA	TAGTTGGTGGGTTTCCCTACCGTGT	GGTCTCG	tata	CGGCGGGCGGAACGGATTCT	gttt	tgagacc	GGTACAGTAAGTGAGAATCCTCTCT	GGTCTTGACAAACGTGTGCTTGTAC
PA14_15020	1273515..1273534	yes	TATGAGGACGAATCTCCCGCTTATA	TAGTTGGTGGGTTTCCCTACCGTGT	GGTCTCG	tata	ACCGTCGATCTCGAGCATGT	gttt	tgagacc	GGTACAGTAAGTGAGAATCCTCTCT	GGTCTTGACAAACGTGTGCTTGTAC
PA14_15030	1275627..1275646	yes	TATGAGGACGAATCTCCCGCTTATA	TAGTTGGTGGGTTTCCCTACCGTGT	GGTCTCG	tata	CACGCAGTCGCGGGCTGACC	gttt	tgagacc	GGTACAGTAAGTGAGAATCCTCTCT	GGTCTTGACAAACGTGTGCTTGTAC
PA14_15050	1276035..1276054	yes	TATGAGGACGAATCTCCCGCTTATA	TAGTTGGTGGGTTTCCCTACCGTGT	GGTCTCG	tata	GATGCCTTGTCGTTTCAGAG	gttt	tgagacc	GGTACAGTAAGTGAGAATCCTCTCT	GGTCTTGACAAACGTGTGCTTGTAC
PA14_15070	1276653..1276672	yes	TATGAGGACGAATCTCCCGCTTATA	TAGTTGGTGGGTTTCCCTACCGTGT	GGTCTCG	tata	GCTGAAAGCGGCGGTCGGGC	gttt	tgagacc	GGTACAGTAAGTGAGAATCCTCTCT	GGTCTTGACAAACGTGTGCTTGTAC
PA14_15080	1278869..1278888	yes	TATGAGGACGAATCTCCCGCTTATA	TAGTTGGTGGGTTTCCCTACCGTGT	GGTCTCG	tata	AGGCCAGCGCGTAGAAGTCA	gttt	tgagacc	GGTACAGTAAGTGAGAATCCTCTCT	GGTCTTGACAAACGTGTGCTTGTAC
PA14_15090	1280641..1280660	yes	TATGAGGACGAATCTCCCGCTTATA	TAGTTGGTGGGTTTCCCTACCGTGT	GGTCTCG	tata	ACAGCCAGAGCAGGCGAAGC	gttt	tgagacc	GGTACAGTAAGTGAGAATCCTCTCT	GGTCTTGACAAACGTGTGCTTGTAC
PA14_15100	1281581..1281600	yes	TATGAGGACGAATCTCCCGCTTATA	TAGTTGGTGGGTTTCCCTACCGTGT	GGTCTCG	tata	GAAACGAAGGCTAGGGTGCG	gttt	tgagacc	GGTACAGTAAGTGAGAATCCTCTCT	GGTCTTGACAAACGTGTGCTTGTAC
PA14_15110	1281784..1281803	yes	TATGAGGACGAATCTCCCGCTTATA	TAGTTGGTGGGTTTCCCTACCGTGT	GGTCTCG	tata	GCCACGGGGCGCCGTGACAG	gttt	tgagacc	GGTACAGTAAGTGAGAATCCTCTCT	GGTCTTGACAAACGTGTGCTTGTAC
PA14_15120	1282309..1282328	yes	TATGAGGACGAATCTCCCGCTTATA	TAGTTGGTGGGTTTCCCTACCGTGT	GGTCTCG	tata	CAGGGCCGCGGCAGCGAAGA	gttt	tgagacc	GGTACAGTAAGTGAGAATCCTCTCT	GGTCTTGACAAACGTGTGCTTGTAC
PA14_15130	1282850..1282869	yes	TATGAGGACGAATCTCCCGCTTATA	TAGTTGGTGGGTTTCCCTACCGTGT	GGTCTCG	tata	AGGCCGGTCTGCGCCGGCAA	gttt	tgagacc	GGTACAGTAAGTGAGAATCCTCTCT	GGTCTTGACAAACGTGTGCTTGTAC
PA14_15140	1284039..1284058	yes	TATGAGGACGAATCTCCCGCTTATA	TAGTTGGTGGGTTTCCCTACCGTGT	GGTCTCG	tata	GGCGCGTTTGGGTTGACGTG	gttt	tgagacc	GGTACAGTAAGTGAGAATCCTCTCT	GGTCTTGACAAACGTGTGCTTGTAC
PA14_15150	1284193..1284212	yes	TATGAGGACGAATCTCCCGCTTATA	TAGTTGGTGGGTTTCCCTACCGTGT	GGTCTCG	tata	CACCACGGCCACGGACTGGC	gttt	tgagacc	GGTACAGTAAGTGAGAATCCTCTCT	GGTCTTGACAAACGTGTGCTTGTAC
PA14_15160	1285817..1285836	yes	TATGAGGACGAATCTCCCGCTTATA	TAGTTGGTGGGTTTCCCTACCGTGT	GGTCTCG	tata	GGCATCGACGATGGGGATGC	gttt	tgagacc	GGTACAGTAAGTGAGAATCCTCTCT	GGTCTTGACAAACGTGTGCTTGTAC
PA14_15180	1287153..1287172	yes	TATGAGGACGAATCTCCCGCTTATA	TAGTTGGTGGGTTTCCCTACCGTGT	GGTCTCG	tata	GAAGGCCGCGATCATGGCGA	gttt	tgagacc	GGTACAGTAAGTGAGAATCCTCTCT	GGTCTTGACAAACGTGTGCTTGTAC
PA14_15190	1287648..1287667	yes	TATGAGGACGAATCTCCCGCTTATA	TAGTTGGTGGGTTTCCCTACCGTGT	GGTCTCG	tata	CGCATGCCCTTGAGCAATGA	gttt	tgagacc	GGTACAGTAAGTGAGAATCCTCTCT	GGTCTTGACAAACGTGTGCTTGTAC
PA14_15200	1288747..1288766	yes	TATGAGGACGAATCTCCCGCTTATA	TAGTTGGTGGGTTTCCCTACCGTGT	GGTCTCG	tata	CGAAGCGGCGGGCGAGGCCG	gttt	tgagacc	GGTACAGTAAGTGAGAATCCTCTCT	GGTCTTGACAAACGTGTGCTTGTAC
PA14_15210	1289846..1289865	yes	TATGAGGACGAATCTCCCGCTTATA	TAGTTGGTGGGTTTCCCTACCGTGT	GGTCTCG	tata	CCAGGGCCCGTTGGCTGAGG	gttt	tgagacc	GGTACAGTAAGTGAGAATCCTCTCT	GGTCTTGACAAACGTGTGCTTGTAC
PA14_15230	1291225..1291244	yes	TATGAGGACGAATCTCCCGCTTATA	TAGTTGGTGGGTTTCCCTACCGTGT	GGTCTCG	tata	TCGAGGCCGAGCCGTTGGAA	gttt	tgagacc	GGTACAGTAAGTGAGAATCCTCTCT	GGTCTTGACAAACGTGTGCTTGTAC
PA14_15240	1292162..1292181	yes	TATGAGGACGAATCTCCCGCTTATA	TAGTTGGTGGGTTTCCCTACCGTGT	GGTCTCG	tata	CGACGATTTCGACGAAGTAA	gttt	tgagacc	GGTACAGTAAGTGAGAATCCTCTCT	GGTCTTGACAAACGTGTGCTTGTAC
PA14_15250	1292319..1292338	yes	TATGAGGACGAATCTCCCGCTTATA	TAGTTGGTGGGTTTCCCTACCGTGT	GGTCTCG	tata	CAGGACTGACGGATCGAGCG	gttt	tgagacc	GGTACAGTAAGTGAGAATCCTCTCT	GGTCTTGACAAACGTGTGCTTGTAC
PA14_15260	1294195..1294214	yes	TATGAGGACGAATCTCCCGCTTATA	TAGTTGGTGGGTTTCCCTACCGTGT	GGTCTCG	tata	GAAGAAGAAAGCGGTACGTC	gttt	tgagacc	GGTACAGTAAGTGAGAATCCTCTCT	GGTCTTGACAAACGTGTGCTTGTAC
PA14_15270	1295376..1295395	yes	TATGAGGACGAATCTCCCGCTTATA	TAGTTGGTGGGTTTCCCTACCGTGT	GGTCTCG	tata	GGCGCTGGCGAGGGTCTTGT	gttt	tgagacc	GGTACAGTAAGTGAGAATCCTCTCT	GGTCTTGACAAACGTGTGCTTGTAC
PA14_15280	1296291..1296310	yes	TATGAGGACGAATCTCCCGCTTATA	TAGTTGGTGGGTTTCCCTACCGTGT	GGTCTCG	tata	GGCCATCGAGGCGGTGCGGT	gttt	tgagacc	GGTACAGTAAGTGAGAATCCTCTCT	GGTCTTGACAAACGTGTGCTTGTAC
PA14_15290	1297390..1297409	yes	TATGAGGACGAATCTCCCGCTTATA	TAGTTGGTGGGTTTCCCTACCGTGT	GGTCTCG	tata	AGGCTGCGGATGACGAATGC	gttt	tgagacc	GGTACAGTAAGTGAGAATCCTCTCT	GGTCTTGACAAACGTGTGCTTGTAC
PA14_15310	1297718..1297737	yes	TATGAGGACGAATCTCCCGCTTATA	TAGTTGGTGGGTTTCCCTACCGTGT	GGTCTCG	tata	AAGGACGTCGTCGAAAGTCA	gttt	tgagacc	GGTACAGTAAGTGAGAATCCTCTCT	GGTCTTGACAAACGTGTGCTTGTAC
PA14_15340	1299249..1299268	yes	TATGAGGACGAATCTCCCGCTTATA	TAGTTGGTGGGTTTCCCTACCGTGT	GGTCTCG	tata	ACGGTGGGCGTGAATGTCTT	gttt	tgagacc	GGTACAGTAAGTGAGAATCCTCTCT	GGTCTTGACAAACGTGTGCTTGTAC
PA14_15350	1301136..1301155	yes	TATGAGGACGAATCTCCCGCTTATA	TAGTTGGTGGGTTTCCCTACCGTGT	GGTCTCG	tata	GAGGTTACGCAGCTTGGTAT	gttt	tgagacc	GGTACAGTAAGTGAGAATCCTCTCT	GGTCTTGACAAACGTGTGCTTGTAC
PA14_15360	1303690..1303709	yes	TATGAGGACGAATCTCCCGCTTATA	TAGTTGGTGGGTTTCCCTACCGTGT	GGTCTCG	tata	CTTCCCAGATAACGATGATT	gttt	tgagacc	GGTACAGTAAGTGAGAATCCTCTCT	GGTCTTGACAAACGTGTGCTTGTAC
PA14_15370	1304051..1304070	yes	TATGAGGACGAATCTCCCGCTTATA	TAGTTGGTGGGTTTCCCTACCGTGT	GGTCTCG	tata	CATGGCGATTGATGTACTGG	gttt	tgagacc	GGTACAGTAAGTGAGAATCCTCTCT	GGTCTTGACAAACGTGTGCTTGTAC
PA14_15380	1304091..1304110	yes	TATGAGGACGAATCTCCCGCTTATA	TAGTTGGTGGGTTTCCCTACCGTGT	GGTCTCG	tata	CATAAGAAGTCCAGCACCGG	gttt	tgagacc	GGTACAGTAAGTGAGAATCCTCTCT	GGTCTTGACAAACGTGTGCTTGTAC
PA14_15380,PA14_15400	1304909..1304928	yes	TATGAGGACGAATCTCCCGCTTATA	TAGTTGGTGGGTTTCCCTACCGTGT	GGTCTCG	tata	AAAAGCCATCGCTTCGCCTC	gttt	tgagacc	GGTACAGTAAGTGAGAATCCTCTCT	GGTCTTGACAAACGTGTGCTTGTAC
PA14_15410	1306153..1306172	yes	TATGAGGACGAATCTCCCGCTTATA	TAGTTGGTGGGTTTCCCTACCGTGT	GGTCTCG	tata	ACAGCGCGTCATCAACGGCA	gttt	tgagacc	GGTACAGTAAGTGAGAATCCTCTCT	GGTCTTGACAAACGTGTGCTTGTAC
PA14_15420	1306382..1306401	yes	TATGAGGACGAATCTCCCGCTTATA	TAGTTGGTGGGTTTCCCTACCGTGT	GGTCTCG	tata	GCGGACAGGATTGAACGACG	gttt	tgagacc	GGTACAGTAAGTGAGAATCCTCTCT	GGTCTTGACAAACGTGTGCTTGTAC
PA14_15430	1306904..1306923	yes	TATGAGGACGAATCTCCCGCTTATA	TAGTTGGTGGGTTTCCCTACCGTGT	GGTCTCG	tata	CGAGCTGCCGTTCTGGGTTC	gttt	tgagacc	GGTACAGTAAGTGAGAATCCTCTCT	GGTCTTGACAAACGTGTGCTTGTAC
PA14_15435	1308057..1308076	yes	TATGAGGACGAATCTCCCGCTTATA	TAGTTGGTGGGTTTCCCTACCGTGT	GGTCTCG	tata	GCGTCGTCCATCCATCCGGC	gttt	tgagacc	GGTACAGTAAGTGAGAATCCTCTCT	GGTCTTGACAAACGTGTGCTTGTAC
PA14_15445	1308293..1308312	yes	TATGAGGACGAATCTCCCGCTTATA	TAGTTGGTGGGTTTCCCTACCGTGT	GGTCTCG	tata	TCTCGGACGGCAAGCGCTCG	gttt	tgagacc	GGTACAGTAAGTGAGAATCCTCTCT	GGTCTTGACAAACGTGTGCTTGTAC
PA14_15450	1308656..1308675	yes	TATGAGGACGAATCTCCCGCTTATA	TAGTTGGTGGGTTTCCCTACCGTGT	GGTCTCG	tata	AGCCAGCCGGGACACCGTGT	gttt	tgagacc	GGTACAGTAAGTGAGAATCCTCTCT	GGTCTTGACAAACGTGTGCTTGTAC
PA14_15460	1310362..1310381	yes	TATGAGGACGAATCTCCCGCTTATA	TAGTTGGTGGGTTTCCCTACCGTGT	GGTCTCG	tata	CATGCCGGTGATTTTTAGAT	gttt	tgagacc	GGTACAGTAAGTGAGAATCCTCTCT	GGTCTTGACAAACGTGTGCTTGTAC
PA14_15470	1310697..1310716	yes	TATGAGGACGAATCTCCCGCTTATA	TAGTTGGTGGGTTTCCCTACCGTGT	GGTCTCG	tata	AACGGCGGCGAGGGCGAGGG	gttt	tgagacc	GGTACAGTAAGTGAGAATCCTCTCT	GGTCTTGACAAACGTGTGCTTGTAC
PA14_15475	1311067..1311086	yes	TATGAGGACGAATCTCCCGCTTATA	TAGTTGGTGGGTTTCCCTACCGTGT	GGTCTCG	tata	AGCGCGCCGCGCCCGGTTTT	gttt	tgagacc	GGTACAGTAAGTGAGAATCCTCTCT	GGTCTTGACAAACGTGTGCTTGTAC
PA14_15480	1311193..1311212	yes	TATGAGGACGAATCTCCCGCTTATA	TAGTTGGTGGGTTTCCCTACCGTGT	GGTCTCG	tata	TGGCGAAAACGCCAATGGTC	gttt	tgagacc	GGTACAGTAAGTGAGAATCCTCTCT	GGTCTTGACAAACGTGTGCTTGTAC
PA14_15490	1311879..1311898	yes	TATGAGGACGAATCTCCCGCTTATA	TAGTTGGTGGGTTTCCCTACCGTGT	GGTCTCG	tata	AAGAGGGCCGAAAGATTGCC	gttt	tgagacc	GGTACAGTAAGTGAGAATCCTCTCT	GGTCTTGACAAACGTGTGCTTGTAC
PA14_15500	1312105..1312124	yes	TATGAGGACGAATCTCCCGCTTATA	TAGTTGGTGGGTTTCCCTACCGTGT	GGTCTCG	tata	CTGCGCGCGCATGAGCCGCG	gttt	tgagacc	GGTACAGTAAGTGAGAATCCTCTCT	GGTCTTGACAAACGTGTGCTTGTAC
PA14_15510	1312693..1312712	yes	TATGAGGACGAATCTCCCGCTTATA	TAGTTGGTGGGTTTCCCTACCGTGT	GGTCTCG	tata	GGCAGTACACCTTGATGGGC	gttt	tgagacc	GGTACAGTAAGTGAGAATCCTCTCT	GGTCTTGACAAACGTGTGCTTGTAC
PA14_15520	1313334..1313353	yes	TATGAGGACGAATCTCCCGCTTATA	TAGTTGGTGGGTTTCCCTACCGTGT	GGTCTCG	tata	GATGCTGCCGGCCAGAACGG	gttt	tgagacc	GGTACAGTAAGTGAGAATCCTCTCT	GGTCTTGACAAACGTGTGCTTGTAC
PA14_15530	1314103..1314122	yes	TATGAGGACGAATCTCCCGCTTATA	TAGTTGGTGGGTTTCCCTACCGTGT	GGTCTCG	tata	AGGCCGGCAAGCAGCATCGT	gttt	tgagacc	GGTACAGTAAGTGAGAATCCTCTCT	GGTCTTGACAAACGTGTGCTTGTAC
PA14_15540	1314421..1314440	yes	TATGAGGACGAATCTCCCGCTTATA	TAGTTGGTGGGTTTCCCTACCGTGT	GGTCTCG	tata	GAGCTGGGCCGACGCGGCTG	gttt	tgagacc	GGTACAGTAAGTGAGAATCCTCTCT	GGTCTTGACAAACGTGTGCTTGTAC
PA14_15560	1316761..1316780	yes	TATGAGGACGAATCTCCCGCTTATA	TAGTTGGTGGGTTTCCCTACCGTGT	GGTCTCG	tata	CCTTCAACGCATCGTAGGCT	gttt	tgagacc	GGTACAGTAAGTGAGAATCCTCTCT	GGTCTTGACAAACGTGTGCTTGTAC
PA14_15570	1317156..1317175	yes	TATGAGGACGAATCTCCCGCTTATA	TAGTTGGTGGGTTTCCCTACCGTGT	GGTCTCG	tata	TGAGAATTTCGCTATCGGGT	gttt	tgagacc	GGTACAGTAAGTGAGAATCCTCTCT	GGTCTTGACAAACGTGTGCTTGTAC
PA14_15580	1317417..1317436	yes	TATGAGGACGAATCTCCCGCTTATA	TAGTTGGTGGGTTTCCCTACCGTGT	GGTCTCG	tata	GATGGCTTGTTCGATTTCTA	gttt	tgagacc	GGTACAGTAAGTGAGAATCCTCTCT	GGTCTTGACAAACGTGTGCTTGTAC
PA14_15590	1321225..1321244	yes	TATGAGGACGAATCTCCCGCTTATA	TAGTTGGTGGGTTTCCCTACCGTGT	GGTCTCG	tata	GGCTTTGCTGTCATGTGATA	gttt	tgagacc	GGTACAGTAAGTGAGAATCCTCTCT	GGTCTTGACAAACGTGTGCTTGTAC
PA14_15600	1323341..1323360	yes	TATGAGGACGAATCTCCCGCTTATA	TAGTTGGTGGGTTTCCCTACCGTGT	GGTCTCG	tata	TGCCGCCAGGTCGTCAAGAT	gttt	tgagacc	GGTACAGTAAGTGAGAATCCTCTCT	GGTCTTGACAAACGTGTGCTTGTAC
PA14_15610	1324833..1324852	yes	TATGAGGACGAATCTCCCGCTTATA	TAGTTGGTGGGTTTCCCTACCGTGT	GGTCTCG	tata	AGCAGACCACGCAAGGATGT	gttt	tgagacc	GGTACAGTAAGTGAGAATCCTCTCT	GGTCTTGACAAACGTGTGCTTGTAC
PA14_15620	1328031..1328050	yes	TATGAGGACGAATCTCCCGCTTATA	TAGTTGGTGGGTTTCCCTACCGTGT	GGTCTCG	tata	TCCGAATCCCGAATTGATGG	gttt	tgagacc	GGTACAGTAAGTGAGAATCCTCTCT	GGTCTTGACAAACGTGTGCTTGTAC
PA14_15620,PA14_15630	1328909..1328928	yes	TATGAGGACGAATCTCCCGCTTATA	TAGTTGGTGGGTTTCCCTACCGTGT	GGTCTCG	tata	CAGAGGCGGCGGGCCTGCTC	gttt	tgagacc	GGTACAGTAAGTGAGAATCCTCTCT	GGTCTTGACAAACGTGTGCTTGTAC
PA14_15650	1331167..1331186	yes	TATGAGGACGAATCTCCCGCTTATA	TAGTTGGTGGGTTTCCCTACCGTGT	GGTCTCG	tata	GGACGATCGCGATAGAAGAT	gttt	tgagacc	GGTACAGTAAGTGAGAATCCTCTCT	GGTCTTGACAAACGTGTGCTTGTAC
PA14_15660	1331361..1331380	yes	TATGAGGACGAATCTCCCGCTTATA	TAGTTGGTGGGTTTCCCTACCGTGT	GGTCTCG	tata	GCTCGCTCAGAACGATCTGA	gttt	tgagacc	GGTACAGTAAGTGAGAATCCTCTCT	GGTCTTGACAAACGTGTGCTTGTAC
PA14_15670	1332522..1332541	yes	TATGAGGACGAATCTCCCGCTTATA	TAGTTGGTGGGTTTCCCTACCGTGT	GGTCTCG	tata	GCCGCCGAGCACTTGTCTAC	gttt	tgagacc	GGTACAGTAAGTGAGAATCCTCTCT	GGTCTTGACAAACGTGTGCTTGTAC
PA14_15680	1333932..1333951	yes	TATGAGGACGAATCTCCCGCTTATA	TAGTTGGTGGGTTTCCCTACCGTGT	GGTCTCG	tata	GACGCACACCTTTTACCGTC	gttt	tgagacc	GGTACAGTAAGTGAGAATCCTCTCT	GGTCTTGACAAACGTGTGCTTGTAC
PA14_15700	1334841..1334860	yes	TATGAGGACGAATCTCCCGCTTATA	TAGTTGGTGGGTTTCCCTACCGTGT	GGTCTCG	tata	ATCCTGATACTGCTGGACCC	gttt	tgagacc	GGTACAGTAAGTGAGAATCCTCTCT	GGTCTTGACAAACGTGTGCTTGTAC
PA14_15710	1336217..1336236	yes	TATGAGGACGAATCTCCCGCTTATA	TAGTTGGTGGGTTTCCCTACCGTGT	GGTCTCG	tata	GGATCGGATGTATGGATCAT	gttt	tgagacc	GGTACAGTAAGTGAGAATCCTCTCT	GGTCTTGACAAACGTGTGCTTGTAC
PA14_15720	1338110..1338129	yes	TATGAGGACGAATCTCCCGCTTATA	TAGTTGGTGGGTTTCCCTACCGTGT	GGTCTCG	tata	GTAGGTGGCCGGGCTGTTGC	gttt	tgagacc	GGTACAGTAAGTGAGAATCCTCTCT	GGTCTTGACAAACGTGTGCTTGTAC
PA14_15740	1338575..1338594	yes	TATGAGGACGAATCTCCCGCTTATA	TAGTTGGTGGGTTTCCCTACCGTGT	GGTCTCG	tata	AAAGGGCGGGAGCGCCGCGC	gttt	tgagacc	GGTACAGTAAGTGAGAATCCTCTCT	GGTCTTGACAAACGTGTGCTTGTAC
PA14_15750	1342489..1342508	yes	TATGAGGACGAATCTCCCGCTTATA	TAGTTGGTGGGTTTCCCTACCGTGT	GGTCTCG	tata	AAGAAGGTCGGGCGACGAGC	gttt	tgagacc	GGTACAGTAAGTGAGAATCCTCTCT	GGTCTTGACAAACGTGTGCTTGTAC
PA14_15770	1342952..1342971	yes	TATGAGGACGAATCTCCCGCTTATA	TAGTTGGTGGGTTTCCCTACCGTGT	GGTCTCG	tata	ACGACATCCAGATGGCTCTC	gttt	tgagacc	GGTACAGTAAGTGAGAATCCTCTCT	GGTCTTGACAAACGTGTGCTTGTAC
PA14_15780	1345131..1345150	yes	TATGAGGACGAATCTCCCGCTTATA	TAGTTGGTGGGTTTCCCTACCGTGT	GGTCTCG	tata	AGGCTTTCGATCAGGAACGG	gttt	tgagacc	GGTACAGTAAGTGAGAATCCTCTCT	GGTCTTGACAAACGTGTGCTTGTAC
PA14_15790	1347668..1347687	yes	TATGAGGACGAATCTCCCGCTTATA	TAGTTGGTGGGTTTCCCTACCGTGT	GGTCTCG	tata	GCCGCTCAGGGGCGCTTTGA	gttt	tgagacc	GGTACAGTAAGTGAGAATCCTCTCT	GGTCTTGACAAACGTGTGCTTGTAC
PA14_15810	1348695..1348714	yes	TATGAGGACGAATCTCCCGCTTATA	TAGTTGGTGGGTTTCCCTACCGTGT	GGTCTCG	tata	ACGGCTCGCCACCGCGGCGG	gttt	tgagacc	GGTACAGTAAGTGAGAATCCTCTCT	GGTCTTGACAAACGTGTGCTTGTAC
PA14_15820	1349797..1349816	yes	TATGAGGACGAATCTCCCGCTTATA	TAGTTGGTGGGTTTCCCTACCGTGT	GGTCTCG	tata	GGATCCAGCCTTGCGGGGTG	gttt	tgagacc	GGTACAGTAAGTGAGAATCCTCTCT	GGTCTTGACAAACGTGTGCTTGTAC
PA14_15830	1350557..1350576	yes	TATGAGGACGAATCTCCCGCTTATA	TAGTTGGTGGGTTTCCCTACCGTGT	GGTCTCG	tata	CGGGACGCAGGGCCAGGAGC	gttt	tgagacc	GGTACAGTAAGTGAGAATCCTCTCT	GGTCTTGACAAACGTGTGCTTGTAC
PA14_15840	1351286..1351305	yes	TATGAGGACGAATCTCCCGCTTATA	TAGTTGGTGGGTTTCCCTACCGTGT	GGTCTCG	tata	GGCCTGGGTCAGACTGGCGA	gttt	tgagacc	GGTACAGTAAGTGAGAATCCTCTCT	GGTCTTGACAAACGTGTGCTTGTAC
PA14_15850	1351920..1351939	yes	TATGAGGACGAATCTCCCGCTTATA	TAGTTGGTGGGTTTCCCTACCGTGT	GGTCTCG	tata	GGACCACCGTGGCGCCGCAC	gttt	tgagacc	GGTACAGTAAGTGAGAATCCTCTCT	GGTCTTGACAAACGTGTGCTTGTAC
PA14_15860	1352126..1352145	yes	TATGAGGACGAATCTCCCGCTTATA	TAGTTGGTGGGTTTCCCTACCGTGT	GGTCTCG	tata	GGCGGTGCGCCTCGATGCGT	gttt	tgagacc	GGTACAGTAAGTGAGAATCCTCTCT	GGTCTTGACAAACGTGTGCTTGTAC
PA14_15870	1352771..1352790	yes	TATGAGGACGAATCTCCCGCTTATA	TAGTTGGTGGGTTTCCCTACCGTGT	GGTCTCG	tata	GTCGGGATGGGTTTCGACGC	gttt	tgagacc	GGTACAGTAAGTGAGAATCCTCTCT	GGTCTTGACAAACGTGTGCTTGTAC
PA14_15880	1353282..1353301	yes	TATGAGGACGAATCTCCCGCTTATA	TAGTTGGTGGGTTTCCCTACCGTGT	GGTCTCG	tata	TGCACGCAGGGCGAAGCCAC	gttt	tgagacc	GGTACAGTAAGTGAGAATCCTCTCT	GGTCTTGACAAACGTGTGCTTGTAC
PA14_15890	1353506..1353525	yes	TATGAGGACGAATCTCCCGCTTATA	TAGTTGGTGGGTTTCCCTACCGTGT	GGTCTCG	tata	CGACAGGGGGGTACCGATAC	gttt	tgagacc	GGTACAGTAAGTGAGAATCCTCTCT	GGTCTTGACAAACGTGTGCTTGTAC
PA14_15910	1354690..1354709	yes	TATGAGGACGAATCTCCCGCTTATA	TAGTTGGTGGGTTTCCCTACCGTGT	GGTCTCG	tata	ACCAGGCCAGCGTTGCCAGC	gttt	tgagacc	GGTACAGTAAGTGAGAATCCTCTCT	GGTCTTGACAAACGTGTGCTTGTAC
PA14_15920	1356726..1356745	yes	TATGAGGACGAATCTCCCGCTTATA	TAGTTGGTGGGTTTCCCTACCGTGT	GGTCTCG	tata	GTCGGCGGCGAGGGTGGCGG	gttt	tgagacc	GGTACAGTAAGTGAGAATCCTCTCT	GGTCTTGACAAACGTGTGCTTGTAC
PA14_15930	1358312..1358331	yes	TATGAGGACGAATCTCCCGCTTATA	TAGTTGGTGGGTTTCCCTACCGTGT	GGTCTCG	tata	GCAGGCCGACCAGGTACCCG	gttt	tgagacc	GGTACAGTAAGTGAGAATCCTCTCT	GGTCTTGACAAACGTGTGCTTGTAC
PA14_15940	1359133..1359152	yes	TATGAGGACGAATCTCCCGCTTATA	TAGTTGGTGGGTTTCCCTACCGTGT	GGTCTCG	tata	GCGATGAGGCTGGGCAGCAG	gttt	tgagacc	GGTACAGTAAGTGAGAATCCTCTCT	GGTCTTGACAAACGTGTGCTTGTAC
PA14_15960	1359476..1359495	yes	TATGAGGACGAATCTCCCGCTTATA	TAGTTGGTGGGTTTCCCTACCGTGT	GGTCTCG	tata	TCTGCGAGAGGCGGTCTGTA	gttt	tgagacc	GGTACAGTAAGTGAGAATCCTCTCT	GGTCTTGACAAACGTGTGCTTGTAC
PA14_15970	1361055..1361074	yes	TATGAGGACGAATCTCCCGCTTATA	TAGTTGGTGGGTTTCCCTACCGTGT	GGTCTCG	tata	GCCGCCACGAGCAAGACGGA	gttt	tgagacc	GGTACAGTAAGTGAGAATCCTCTCT	GGTCTTGACAAACGTGTGCTTGTAC
PA14_15980	1361318..1361337	yes	TATGAGGACGAATCTCCCGCTTATA	TAGTTGGTGGGTTTCCCTACCGTGT	GGTCTCG	tata	ACCAGGTCGTCGGCGGGTGT	gttt	tgagacc	GGTACAGTAAGTGAGAATCCTCTCT	GGTCTTGACAAACGTGTGCTTGTAC
PA14_15990	1361888..1361907	yes	TATGAGGACGAATCTCCCGCTTATA	TAGTTGGTGGGTTTCCCTACCGTGT	GGTCTCG	tata	CTGATCGCGCGGAACATCTC	gttt	tgagacc	GGTACAGTAAGTGAGAATCCTCTCT	GGTCTTGACAAACGTGTGCTTGTAC
PA14_16000	1362653..1362672	yes	TATGAGGACGAATCTCCCGCTTATA	TAGTTGGTGGGTTTCCCTACCGTGT	GGTCTCG	tata	GATCTGCTGAATGATCTTGT	gttt	tgagacc	GGTACAGTAAGTGAGAATCCTCTCT	GGTCTTGACAAACGTGTGCTTGTAC
PA14_16010	1363155..1363174	yes	TATGAGGACGAATCTCCCGCTTATA	TAGTTGGTGGGTTTCCCTACCGTGT	GGTCTCG	tata	CAGGATTTCTTGCTCTCTGG	gttt	tgagacc	GGTACAGTAAGTGAGAATCCTCTCT	GGTCTTGACAAACGTGTGCTTGTAC
PA14_16020	1364303..1364322	yes	TATGAGGACGAATCTCCCGCTTATA	TAGTTGGTGGGTTTCCCTACCGTGT	GGTCTCG	tata	GGAATGTTGTTGATTGGACA	gttt	tgagacc	GGTACAGTAAGTGAGAATCCTCTCT	GGTCTTGACAAACGTGTGCTTGTAC
PA14_16030	1366250..1366269	yes	TATGAGGACGAATCTCCCGCTTATA	TAGTTGGTGGGTTTCCCTACCGTGT	GGTCTCG	tata	GGGCGAGCAGGATAGCGTTC	gttt	tgagacc	GGTACAGTAAGTGAGAATCCTCTCT	GGTCTTGACAAACGTGTGCTTGTAC
PA14_16040	1366502..1366521	yes	TATGAGGACGAATCTCCCGCTTATA	TAGTTGGTGGGTTTCCCTACCGTGT	GGTCTCG	tata	GTCGATCAGGGGATGTTCGA	gttt	tgagacc	GGTACAGTAAGTGAGAATCCTCTCT	GGTCTTGACAAACGTGTGCTTGTAC
PA14_16050	1367528..1367547	yes	TATGAGGACGAATCTCCCGCTTATA	TAGTTGGTGGGTTTCCCTACCGTGT	GGTCTCG	tata	GGCGGCAGCAGCCAGAAAAC	gttt	tgagacc	GGTACAGTAAGTGAGAATCCTCTCT	GGTCTTGACAAACGTGTGCTTGTAC
PA14_16070	1368466..1368485	yes	TATGAGGACGAATCTCCCGCTTATA	TAGTTGGTGGGTTTCCCTACCGTGT	GGTCTCG	tata	CCACAGATGCCTACTTTGAC	gttt	tgagacc	GGTACAGTAAGTGAGAATCCTCTCT	GGTCTTGACAAACGTGTGCTTGTAC
PA14_16090	1369833..1369852	yes	TATGAGGACGAATCTCCCGCTTATA	TAGTTGGTGGGTTTCCCTACCGTGT	GGTCTCG	tata	CAGGGCGGGCGCTTGGCCGC	gttt	tgagacc	GGTACAGTAAGTGAGAATCCTCTCT	GGTCTTGACAAACGTGTGCTTGTAC
PA14_16100	1372464..1372483	yes	TATGAGGACGAATCTCCCGCTTATA	TAGTTGGTGGGTTTCCCTACCGTGT	GGTCTCG	tata	TGGCTATTTGCGCCGGCTCG	gttt	tgagacc	GGTACAGTAAGTGAGAATCCTCTCT	GGTCTTGACAAACGTGTGCTTGTAC
PA14_16110	1372605..1372624	yes	TATGAGGACGAATCTCCCGCTTATA	TAGTTGGTGGGTTTCCCTACCGTGT	GGTCTCG	tata	CATCGGCCAGTCGTTGCTTC	gttt	tgagacc	GGTACAGTAAGTGAGAATCCTCTCT	GGTCTTGACAAACGTGTGCTTGTAC
PA14_16130	1374257..1374276	yes	TATGAGGACGAATCTCCCGCTTATA	TAGTTGGTGGGTTTCCCTACCGTGT	GGTCTCG	tata	TGTTCCATGCGGTGTCCGTC	gttt	tgagacc	GGTACAGTAAGTGAGAATCCTCTCT	GGTCTTGACAAACGTGTGCTTGTAC
PA14_16140	1374789..1374808	yes	TATGAGGACGAATCTCCCGCTTATA	TAGTTGGTGGGTTTCCCTACCGTGT	GGTCTCG	tata	CGAGCGAGCGTTCCATACCC	gttt	tgagacc	GGTACAGTAAGTGAGAATCCTCTCT	GGTCTTGACAAACGTGTGCTTGTAC
PA14_16150	1375265..1375284	yes	TATGAGGACGAATCTCCCGCTTATA	TAGTTGGTGGGTTTCCCTACCGTGT	GGTCTCG	tata	CTCGTTGGCTCCGCCGCGCA	gttt	tgagacc	GGTACAGTAAGTGAGAATCCTCTCT	GGTCTTGACAAACGTGTGCTTGTAC
PA14_16160	1375999..1376018	yes	TATGAGGACGAATCTCCCGCTTATA	TAGTTGGTGGGTTTCCCTACCGTGT	GGTCTCG	tata	GAAACGACAGCGCCGTCTGC	gttt	tgagacc	GGTACAGTAAGTGAGAATCCTCTCT	GGTCTTGACAAACGTGTGCTTGTAC
PA14_16180	1376686..1376705	yes	TATGAGGACGAATCTCCCGCTTATA	TAGTTGGTGGGTTTCCCTACCGTGT	GGTCTCG	tata	AGGCCCACTCCCAGCAGGAG	gttt	tgagacc	GGTACAGTAAGTGAGAATCCTCTCT	GGTCTTGACAAACGTGTGCTTGTAC
PA14_16190	1378897..1378916	yes	TATGAGGACGAATCTCCCGCTTATA	TAGTTGGTGGGTTTCCCTACCGTGT	GGTCTCG	tata	TACGTCCTGCGCGGGAGTTG	gttt	tgagacc	GGTACAGTAAGTGAGAATCCTCTCT	GGTCTTGACAAACGTGTGCTTGTAC
PA14_16200	1384178..1384197	yes	TATGAGGACGAATCTCCCGCTTATA	TAGTTGGTGGGTTTCCCTACCGTGT	GGTCTCG	tata	TGCTCAGCTTCAGGTCGGCC	gttt	tgagacc	GGTACAGTAAGTGAGAATCCTCTCT	GGTCTTGACAAACGTGTGCTTGTAC
PA14_16210	1384943..1384962	yes	TATGAGGACGAATCTCCCGCTTATA	TAGTTGGTGGGTTTCCCTACCGTGT	GGTCTCG	tata	TTTATAGGGCGTGGATTGCA	gttt	tgagacc	GGTACAGTAAGTGAGAATCCTCTCT	GGTCTTGACAAACGTGTGCTTGTAC
PA14_16220	1385534..1385553	yes	TATGAGGACGAATCTCCCGCTTATA	TAGTTGGTGGGTTTCCCTACCGTGT	GGTCTCG	tata	AGGGTTTCGGGCAGGGGGCG	gttt	tgagacc	GGTACAGTAAGTGAGAATCCTCTCT	GGTCTTGACAAACGTGTGCTTGTAC
PA14_16250	1387547..1387566	yes	TATGAGGACGAATCTCCCGCTTATA	TAGTTGGTGGGTTTCCCTACCGTGT	GGTCTCG	tata	CCATGATCGCAACGAACAAC	gttt	tgagacc	GGTACAGTAAGTGAGAATCCTCTCT	GGTCTTGACAAACGTGTGCTTGTAC
PA14_16260	1389208..1389227	yes	TATGAGGACGAATCTCCCGCTTATA	TAGTTGGTGGGTTTCCCTACCGTGT	GGTCTCG	tata	GTGATTTGACGCAGGCTAAG	gttt	tgagacc	GGTACAGTAAGTGAGAATCCTCTCT	GGTCTTGACAAACGTGTGCTTGTAC
PA14_16270	1390494..1390513	yes	TATGAGGACGAATCTCCCGCTTATA	TAGTTGGTGGGTTTCCCTACCGTGT	GGTCTCG	tata	GGAGGCGTGGGGAGAACCGG	gttt	tgagacc	GGTACAGTAAGTGAGAATCCTCTCT	GGTCTTGACAAACGTGTGCTTGTAC
PA14_16280	1391450..1391469	yes	TATGAGGACGAATCTCCCGCTTATA	TAGTTGGTGGGTTTCCCTACCGTGT	GGTCTCG	tata	GCCGCGTTCGGTCAGACGGG	gttt	tgagacc	GGTACAGTAAGTGAGAATCCTCTCT	GGTCTTGACAAACGTGTGCTTGTAC
PA14_16290	1391698..1391717	yes	TATGAGGACGAATCTCCCGCTTATA	TAGTTGGTGGGTTTCCCTACCGTGT	GGTCTCG	tata	ATCCAACAGGCTCTTAGCGG	gttt	tgagacc	GGTACAGTAAGTGAGAATCCTCTCT	GGTCTTGACAAACGTGTGCTTGTAC
PA14_16300	1392128..1392147	yes	TATGAGGACGAATCTCCCGCTTATA	TAGTTGGTGGGTTTCCCTACCGTGT	GGTCTCG	tata	TTTGTTGCGCGGAGTGTTCA	gttt	tgagacc	GGTACAGTAAGTGAGAATCCTCTCT	GGTCTTGACAAACGTGTGCTTGTAC
PA14_16310	1392441..1392460	yes	TATGAGGACGAATCTCCCGCTTATA	TAGTTGGTGGGTTTCCCTACCGTGT	GGTCTCG	tata	GCGGACGAGCGGGAGTGGAC	gttt	tgagacc	GGTACAGTAAGTGAGAATCCTCTCT	GGTCTTGACAAACGTGTGCTTGTAC
PA14_16320	1394069..1394088	yes	TATGAGGACGAATCTCCCGCTTATA	TAGTTGGTGGGTTTCCCTACCGTGT	GGTCTCG	tata	GGAGGTCTTCGATTTGCAGT	gttt	tgagacc	GGTACAGTAAGTGAGAATCCTCTCT	GGTCTTGACAAACGTGTGCTTGTAC
PA14_16330	1394336..1394355	yes	TATGAGGACGAATCTCCCGCTTATA	TAGTTGGTGGGTTTCCCTACCGTGT	GGTCTCG	tata	CGGAGACGGCGAGGGTGTTG	gttt	tgagacc	GGTACAGTAAGTGAGAATCCTCTCT	GGTCTTGACAAACGTGTGCTTGTAC
PA14_16340	1396871..1396890	no	TATGAGGACGAATCTCCCGCTTATA	TAGTTGGTGGGTTTCCCTACCGTGT	GGTCTCG	tata	GGGCGGAGAGGCGGCGGTTA	gttt	tgagacc	GGTACAGTAAGTGAGAATCCTCTCT	GGTCTTGACAAACGTGTGCTTGTAC
PA14_16350	1397621..1397640	yes	TATGAGGACGAATCTCCCGCTTATA	TAGTTGGTGGGTTTCCCTACCGTGT	GGTCTCG	tata	TGAGGGCGTGGTCGTCGACG	gttt	tgagacc	GGTACAGTAAGTGAGAATCCTCTCT	GGTCTTGACAAACGTGTGCTTGTAC
PA14_16360	1399820..1399839	yes	TATGAGGACGAATCTCCCGCTTATA	TAGTTGGTGGGTTTCCCTACCGTGT	GGTCTCG	tata	CAGGAAGTCGCGGCGGGAGA	gttt	tgagacc	GGTACAGTAAGTGAGAATCCTCTCT	GGTCTTGACAAACGTGTGCTTGTAC
PA14_16370	1400178..1400197	yes	TATGAGGACGAATCTCCCGCTTATA	TAGTTGGTGGGTTTCCCTACCGTGT	GGTCTCG	tata	CAATTGGTCGAGCAAACCAC	gttt	tgagacc	GGTACAGTAAGTGAGAATCCTCTCT	GGTCTTGACAAACGTGTGCTTGTAC
PA14_16380	1401766..1401785	yes	TATGAGGACGAATCTCCCGCTTATA	TAGTTGGTGGGTTTCCCTACCGTGT	GGTCTCG	tata	GCAACTCGAGGAAGAAACGC	gttt	tgagacc	GGTACAGTAAGTGAGAATCCTCTCT	GGTCTTGACAAACGTGTGCTTGTAC
PA14_16390	1401983..1402002	yes	TATGAGGACGAATCTCCCGCTTATA	TAGTTGGTGGGTTTCCCTACCGTGT	GGTCTCG	tata	TCGTAGGTATCCAGTACCTC	gttt	tgagacc	GGTACAGTAAGTGAGAATCCTCTCT	GGTCTTGACAAACGTGTGCTTGTAC
PA14_16410	1403766..1403785	yes	TATGAGGACGAATCTCCCGCTTATA	TAGTTGGTGGGTTTCCCTACCGTGT	GGTCTCG	tata	GGAAGGGGTCGTTGCGTACT	gttt	tgagacc	GGTACAGTAAGTGAGAATCCTCTCT	GGTCTTGACAAACGTGTGCTTGTAC
PA14_16430	1405668..1405687	yes	TATGAGGACGAATCTCCCGCTTATA	TAGTTGGTGGGTTTCCCTACCGTGT	GGTCTCG	tata	CGAAACTTGCCAGGATTCGC	gttt	tgagacc	GGTACAGTAAGTGAGAATCCTCTCT	GGTCTTGACAAACGTGTGCTTGTAC
PA14_16440	1407285..1407304	yes	TATGAGGACGAATCTCCCGCTTATA	TAGTTGGTGGGTTTCCCTACCGTGT	GGTCTCG	tata	ATCGCCGGTGGAGCGGGACA	gttt	tgagacc	GGTACAGTAAGTGAGAATCCTCTCT	GGTCTTGACAAACGTGTGCTTGTAC
PA14_16450	1407813..1407832	yes	TATGAGGACGAATCTCCCGCTTATA	TAGTTGGTGGGTTTCCCTACCGTGT	GGTCTCG	tata	GGCCGATCCTGCTCTTGAGC	gttt	tgagacc	GGTACAGTAAGTGAGAATCCTCTCT	GGTCTTGACAAACGTGTGCTTGTAC
PA14_16460	1409068..1409087	yes	TATGAGGACGAATCTCCCGCTTATA	TAGTTGGTGGGTTTCCCTACCGTGT	GGTCTCG	tata	GTTGGGTATCGAGCAAGGTC	gttt	tgagacc	GGTACAGTAAGTGAGAATCCTCTCT	GGTCTTGACAAACGTGTGCTTGTAC
PA14_16470	1409744..1409763	yes	TATGAGGACGAATCTCCCGCTTATA	TAGTTGGTGGGTTTCCCTACCGTGT	GGTCTCG	tata	CGCGTCTCTCATCTGGTCCG	gttt	tgagacc	GGTACAGTAAGTGAGAATCCTCTCT	GGTCTTGACAAACGTGTGCTTGTAC
PA14_16480	1412073..1412092	yes	TATGAGGACGAATCTCCCGCTTATA	TAGTTGGTGGGTTTCCCTACCGTGT	GGTCTCG	tata	CGCAGCGCCTCGACGGCCAA	gttt	tgagacc	GGTACAGTAAGTGAGAATCCTCTCT	GGTCTTGACAAACGTGTGCTTGTAC
PA14_16500	1413169..1413188	yes	TATGAGGACGAATCTCCCGCTTATA	TAGTTGGTGGGTTTCCCTACCGTGT	GGTCTCG	tata	GGTCGGTCTTGCTCTCATGA	gttt	tgagacc	GGTACAGTAAGTGAGAATCCTCTCT	GGTCTTGACAAACGTGTGCTTGTAC
PA14_16510	1414438..1414457	yes	TATGAGGACGAATCTCCCGCTTATA	TAGTTGGTGGGTTTCCCTACCGTGT	GGTCTCG	tata	CGTTGGGGTCTTCGAGCTCG	gttt	tgagacc	GGTACAGTAAGTGAGAATCCTCTCT	GGTCTTGACAAACGTGTGCTTGTAC
PA14_16530	1415611..1415630	yes	TATGAGGACGAATCTCCCGCTTATA	TAGTTGGTGGGTTTCCCTACCGTGT	GGTCTCG	tata	GTTCGTGCTGGTCGAGTTGT	gttt	tgagacc	GGTACAGTAAGTGAGAATCCTCTCT	GGTCTTGACAAACGTGTGCTTGTAC
PA14_16550	1417324..1417343	yes	TATGAGGACGAATCTCCCGCTTATA	TAGTTGGTGGGTTTCCCTACCGTGT	GGTCTCG	tata	GCTGTCTCTGGGAGCTACTC	gttt	tgagacc	GGTACAGTAAGTGAGAATCCTCTCT	GGTCTTGACAAACGTGTGCTTGTAC
PA14_16560	1418137..1418156	yes	TATGAGGACGAATCTCCCGCTTATA	TAGTTGGTGGGTTTCCCTACCGTGT	GGTCTCG	tata	CAGGACCACCAGGCAACGCC	gttt	tgagacc	GGTACAGTAAGTGAGAATCCTCTCT	GGTCTTGACAAACGTGTGCTTGTAC
PA14_16580	1418695..1418714	yes	TATGAGGACGAATCTCCCGCTTATA	TAGTTGGTGGGTTTCCCTACCGTGT	GGTCTCG	tata	AGTCGTTCTGCGCCTTGCGC	gttt	tgagacc	GGTACAGTAAGTGAGAATCCTCTCT	GGTCTTGACAAACGTGTGCTTGTAC
PA14_16590	1420058..1420077	yes	TATGAGGACGAATCTCCCGCTTATA	TAGTTGGTGGGTTTCCCTACCGTGT	GGTCTCG	tata	GCGGTAGTCGAGTTCGTGGC	gttt	tgagacc	GGTACAGTAAGTGAGAATCCTCTCT	GGTCTTGACAAACGTGTGCTTGTAC
PA14_16600	1420841..1420860	yes	TATGAGGACGAATCTCCCGCTTATA	TAGTTGGTGGGTTTCCCTACCGTGT	GGTCTCG	tata	GCAGCGAACTGCAACCACCG	gttt	tgagacc	GGTACAGTAAGTGAGAATCCTCTCT	GGTCTTGACAAACGTGTGCTTGTAC
PA14_16610	1421707..1421726	yes	TATGAGGACGAATCTCCCGCTTATA	TAGTTGGTGGGTTTCCCTACCGTGT	GGTCTCG	tata	GGATGCAGGGGAGTACGTTA	gttt	tgagacc	GGTACAGTAAGTGAGAATCCTCTCT	GGTCTTGACAAACGTGTGCTTGTAC
PA14_16620	1422023..1422042	yes	TATGAGGACGAATCTCCCGCTTATA	TAGTTGGTGGGTTTCCCTACCGTGT	GGTCTCG	tata	CCCCTGCCAGACGCGGACCT	gttt	tgagacc	GGTACAGTAAGTGAGAATCCTCTCT	GGTCTTGACAAACGTGTGCTTGTAC
PA14_16630	1423360..1423379	yes	TATGAGGACGAATCTCCCGCTTATA	TAGTTGGTGGGTTTCCCTACCGTGT	GGTCTCG	tata	CAGCAGGGATACGGCGGGGA	gttt	tgagacc	GGTACAGTAAGTGAGAATCCTCTCT	GGTCTTGACAAACGTGTGCTTGTAC
PA14_16640	1423798..1423817	yes	TATGAGGACGAATCTCCCGCTTATA	TAGTTGGTGGGTTTCCCTACCGTGT	GGTCTCG	tata	CTTGAGGCCACGCAGGGAAC	gttt	tgagacc	GGTACAGTAAGTGAGAATCCTCTCT	GGTCTTGACAAACGTGTGCTTGTAC
PA14_16660	1426454..1426473	yes	TATGAGGACGAATCTCCCGCTTATA	TAGTTGGTGGGTTTCCCTACCGTGT	GGTCTCG	tata	AGCAAGTGTCGGCGTGTTCG	gttt	tgagacc	GGTACAGTAAGTGAGAATCCTCTCT	GGTCTTGACAAACGTGTGCTTGTAC
PA14_16670	1426644..1426663	yes	TATGAGGACGAATCTCCCGCTTATA	TAGTTGGTGGGTTTCCCTACCGTGT	GGTCTCG	tata	TTCGCGCTCGTAGTAGCGGA	gttt	tgagacc	GGTACAGTAAGTGAGAATCCTCTCT	GGTCTTGACAAACGTGTGCTTGTAC
PA14_16680	1427388..1427407	yes	TATGAGGACGAATCTCCCGCTTATA	TAGTTGGTGGGTTTCCCTACCGTGT	GGTCTCG	tata	CCCAATGGCGGACAAGCTCA	gttt	tgagacc	GGTACAGTAAGTGAGAATCCTCTCT	GGTCTTGACAAACGTGTGCTTGTAC
PA14_16690	1427632..1427651	yes	TATGAGGACGAATCTCCCGCTTATA	TAGTTGGTGGGTTTCCCTACCGTGT	GGTCTCG	tata	CGCAGGCGCGCATCGATTTC	gttt	tgagacc	GGTACAGTAAGTGAGAATCCTCTCT	GGTCTTGACAAACGTGTGCTTGTAC
PA14_16700	1430450..1430469	yes	TATGAGGACGAATCTCCCGCTTATA	TAGTTGGTGGGTTTCCCTACCGTGT	GGTCTCG	tata	TGGGTGCCTTTGCCGGCACC	gttt	tgagacc	GGTACAGTAAGTGAGAATCCTCTCT	GGTCTTGACAAACGTGTGCTTGTAC
PA14_16710	1431181..1431200	yes	TATGAGGACGAATCTCCCGCTTATA	TAGTTGGTGGGTTTCCCTACCGTGT	GGTCTCG	tata	GGTATCCAGGGCCAACAGAG	gttt	tgagacc	GGTACAGTAAGTGAGAATCCTCTCT	GGTCTTGACAAACGTGTGCTTGTAC
PA14_16720	1431953..1431972	yes	TATGAGGACGAATCTCCCGCTTATA	TAGTTGGTGGGTTTCCCTACCGTGT	GGTCTCG	tata	GCGCTCCAGCGGCAACGAAG	gttt	tgagacc	GGTACAGTAAGTGAGAATCCTCTCT	GGTCTTGACAAACGTGTGCTTGTAC
PA14_16730	1432304..1432323	yes	TATGAGGACGAATCTCCCGCTTATA	TAGTTGGTGGGTTTCCCTACCGTGT	GGTCTCG	tata	ACAACCGAGGAAATAAGGAA	gttt	tgagacc	GGTACAGTAAGTGAGAATCCTCTCT	GGTCTTGACAAACGTGTGCTTGTAC
PA14_16740	1433250..1433269	yes	TATGAGGACGAATCTCCCGCTTATA	TAGTTGGTGGGTTTCCCTACCGTGT	GGTCTCG	tata	CGCGGAAACGTTCGGCGCGT	gttt	tgagacc	GGTACAGTAAGTGAGAATCCTCTCT	GGTCTTGACAAACGTGTGCTTGTAC
PA14_16750	1434073..1434092	yes	TATGAGGACGAATCTCCCGCTTATA	TAGTTGGTGGGTTTCCCTACCGTGT	GGTCTCG	tata	GCAATGGCAGCAACCAGGCC	gttt	tgagacc	GGTACAGTAAGTGAGAATCCTCTCT	GGTCTTGACAAACGTGTGCTTGTAC
PA14_16770	1434820..1434839	yes	TATGAGGACGAATCTCCCGCTTATA	TAGTTGGTGGGTTTCCCTACCGTGT	GGTCTCG	tata	CAGGCGAGGAGCGGTGGAAT	gttt	tgagacc	GGTACAGTAAGTGAGAATCCTCTCT	GGTCTTGACAAACGTGTGCTTGTAC
PA14_16780	1435640..1435659	yes	TATGAGGACGAATCTCCCGCTTATA	TAGTTGGTGGGTTTCCCTACCGTGT	GGTCTCG	tata	CCGGCGAATCGGACAATCGA	gttt	tgagacc	GGTACAGTAAGTGAGAATCCTCTCT	GGTCTTGACAAACGTGTGCTTGTAC
PA14_16790	1437518..1437537	yes	TATGAGGACGAATCTCCCGCTTATA	TAGTTGGTGGGTTTCCCTACCGTGT	GGTCTCG	tata	CCGGGACCGACGGAGGAGGT	gttt	tgagacc	GGTACAGTAAGTGAGAATCCTCTCT	GGTCTTGACAAACGTGTGCTTGTAC
PA14_16800	1437653..1437672	yes	TATGAGGACGAATCTCCCGCTTATA	TAGTTGGTGGGTTTCCCTACCGTGT	GGTCTCG	tata	GGGCGACGAGCGGGATATGG	gttt	tgagacc	GGTACAGTAAGTGAGAATCCTCTCT	GGTCTTGACAAACGTGTGCTTGTAC
PA14_16820	1438760..1438779	yes	TATGAGGACGAATCTCCCGCTTATA	TAGTTGGTGGGTTTCCCTACCGTGT	GGTCTCG	tata	CGCCCAGGCGGAAAGGTTGA	gttt	tgagacc	GGTACAGTAAGTGAGAATCCTCTCT	GGTCTTGACAAACGTGTGCTTGTAC
PA14_16830	1442526..1442545	yes	TATGAGGACGAATCTCCCGCTTATA	TAGTTGGTGGGTTTCCCTACCGTGT	GGTCTCG	tata	CGGCGCAGAGGGCAGTGAGT	gttt	tgagacc	GGTACAGTAAGTGAGAATCCTCTCT	GGTCTTGACAAACGTGTGCTTGTAC
PA14_16840	1443054..1443073	yes	TATGAGGACGAATCTCCCGCTTATA	TAGTTGGTGGGTTTCCCTACCGTGT	GGTCTCG	tata	ACGCTGGCGGCGAGCAGCAA	gttt	tgagacc	GGTACAGTAAGTGAGAATCCTCTCT	GGTCTTGACAAACGTGTGCTTGTAC
PA14_16860	1445710..1445729	yes	TATGAGGACGAATCTCCCGCTTATA	TAGTTGGTGGGTTTCCCTACCGTGT	GGTCTCG	tata	AAGCGGCGGAAAGGGTAGCG	gttt	tgagacc	GGTACAGTAAGTGAGAATCCTCTCT	GGTCTTGACAAACGTGTGCTTGTAC
PA14_16870	1446039..1446058	yes	TATGAGGACGAATCTCCCGCTTATA	TAGTTGGTGGGTTTCCCTACCGTGT	GGTCTCG	tata	GCGAGCCGAAGCGTTTGCCG	gttt	tgagacc	GGTACAGTAAGTGAGAATCCTCTCT	GGTCTTGACAAACGTGTGCTTGTAC
PA14_16880	1446954..1446973	yes	TATGAGGACGAATCTCCCGCTTATA	TAGTTGGTGGGTTTCCCTACCGTGT	GGTCTCG	tata	AGCTCGCGCTTGAAGATCAC	gttt	tgagacc	GGTACAGTAAGTGAGAATCCTCTCT	GGTCTTGACAAACGTGTGCTTGTAC
PA14_16890	1447703..1447722	yes	TATGAGGACGAATCTCCCGCTTATA	TAGTTGGTGGGTTTCCCTACCGTGT	GGTCTCG	tata	CAGCAACAGCCCGGCGCCAG	gttt	tgagacc	GGTACAGTAAGTGAGAATCCTCTCT	GGTCTTGACAAACGTGTGCTTGTAC
PA14_16910	1449587..1449606	yes	TATGAGGACGAATCTCCCGCTTATA	TAGTTGGTGGGTTTCCCTACCGTGT	GGTCTCG	tata	CTGCAGCCAGGCGAAGGTTC	gttt	tgagacc	GGTACAGTAAGTGAGAATCCTCTCT	GGTCTTGACAAACGTGTGCTTGTAC
PA14_16920	1450917..1450936	yes	TATGAGGACGAATCTCCCGCTTATA	TAGTTGGTGGGTTTCCCTACCGTGT	GGTCTCG	tata	GGGCCTGTTCGGGGAGAACC	gttt	tgagacc	GGTACAGTAAGTGAGAATCCTCTCT	GGTCTTGACAAACGTGTGCTTGTAC
PA14_16930	1452120..1452139	yes	TATGAGGACGAATCTCCCGCTTATA	TAGTTGGTGGGTTTCCCTACCGTGT	GGTCTCG	tata	GGCGCGCCAGGGAGACGGCA	gttt	tgagacc	GGTACAGTAAGTGAGAATCCTCTCT	GGTCTTGACAAACGTGTGCTTGTAC
PA14_16950	1453243..1453262	yes	TATGAGGACGAATCTCCCGCTTATA	TAGTTGGTGGGTTTCCCTACCGTGT	GGTCTCG	tata	GCCGAAGGCCAGGCTGAACA	gttt	tgagacc	GGTACAGTAAGTGAGAATCCTCTCT	GGTCTTGACAAACGTGTGCTTGTAC
PA14_16960	1453896..1453915	yes	TATGAGGACGAATCTCCCGCTTATA	TAGTTGGTGGGTTTCCCTACCGTGT	GGTCTCG	tata	GGCGGGTACGAACAGGGCCC	gttt	tgagacc	GGTACAGTAAGTGAGAATCCTCTCT	GGTCTTGACAAACGTGTGCTTGTAC
PA14_16970	1454262..1454281	yes	TATGAGGACGAATCTCCCGCTTATA	TAGTTGGTGGGTTTCCCTACCGTGT	GGTCTCG	tata	TTTGATGCCGTAGAGAACGT	gttt	tgagacc	GGTACAGTAAGTGAGAATCCTCTCT	GGTCTTGACAAACGTGTGCTTGTAC
PA14_16980	1454611..1454630	yes	TATGAGGACGAATCTCCCGCTTATA	TAGTTGGTGGGTTTCCCTACCGTGT	GGTCTCG	tata	GCAGGCGTAATTGGTCTATC	gttt	tgagacc	GGTACAGTAAGTGAGAATCCTCTCT	GGTCTTGACAAACGTGTGCTTGTAC
PA14_16990	1455220..1455239	yes	TATGAGGACGAATCTCCCGCTTATA	TAGTTGGTGGGTTTCCCTACCGTGT	GGTCTCG	tata	GCTCTTCAGCAACAGCATCT	gttt	tgagacc	GGTACAGTAAGTGAGAATCCTCTCT	GGTCTTGACAAACGTGTGCTTGTAC
PA14_17000	1455889..1455908	yes	TATGAGGACGAATCTCCCGCTTATA	TAGTTGGTGGGTTTCCCTACCGTGT	GGTCTCG	tata	CATCGAGGCGAGCAGCAGTG	gttt	tgagacc	GGTACAGTAAGTGAGAATCCTCTCT	GGTCTTGACAAACGTGTGCTTGTAC
PA14_17010	1456188..1456207	yes	TATGAGGACGAATCTCCCGCTTATA	TAGTTGGTGGGTTTCCCTACCGTGT	GGTCTCG	tata	ATTGCACCATCGCGATCGGT	gttt	tgagacc	GGTACAGTAAGTGAGAATCCTCTCT	GGTCTTGACAAACGTGTGCTTGTAC
PA14_17030	1459146..1459165	yes	TATGAGGACGAATCTCCCGCTTATA	TAGTTGGTGGGTTTCCCTACCGTGT	GGTCTCG	tata	GGGCTGGAGGTTGTCGAGTG	gttt	tgagacc	GGTACAGTAAGTGAGAATCCTCTCT	GGTCTTGACAAACGTGTGCTTGTAC
PA14_17040	1461870..1461889	yes	TATGAGGACGAATCTCCCGCTTATA	TAGTTGGTGGGTTTCCCTACCGTGT	GGTCTCG	tata	AACAATTCGGGATCCACCTG	gttt	tgagacc	GGTACAGTAAGTGAGAATCCTCTCT	GGTCTTGACAAACGTGTGCTTGTAC
PA14_17050	1462821..1462840	yes	TATGAGGACGAATCTCCCGCTTATA	TAGTTGGTGGGTTTCCCTACCGTGT	GGTCTCG	tata	GTCCGGCGTCTTGATGGTGA	gttt	tgagacc	GGTACAGTAAGTGAGAATCCTCTCT	GGTCTTGACAAACGTGTGCTTGTAC
PA14_17060	1463119..1463138	yes	TATGAGGACGAATCTCCCGCTTATA	TAGTTGGTGGGTTTCCCTACCGTGT	GGTCTCG	tata	CATATCGCGCATGTTGACTT	gttt	tgagacc	GGTACAGTAAGTGAGAATCCTCTCT	GGTCTTGACAAACGTGTGCTTGTAC
PA14_17070	1464005..1464024	no	TATGAGGACGAATCTCCCGCTTATA	TAGTTGGTGGGTTTCCCTACCGTGT	GGTCTCG	tata	CTCGCGCAGTTCTTTAACCA	gttt	tgagacc	GGTACAGTAAGTGAGAATCCTCTCT	GGTCTTGACAAACGTGTGCTTGTAC
PA14_17080	1465081..1465100	no	TATGAGGACGAATCTCCCGCTTATA	TAGTTGGTGGGTTTCCCTACCGTGT	GGTCTCG	tata	AGAAGAATGCGTTTATAGCG	gttt	tgagacc	GGTACAGTAAGTGAGAATCCTCTCT	GGTCTTGACAAACGTGTGCTTGTAC
PA14_17100	1465840..1465859	yes	TATGAGGACGAATCTCCCGCTTATA	TAGTTGGTGGGTTTCCCTACCGTGT	GGTCTCG	tata	GGCATGGCCCAGCGCTTCCA	gttt	tgagacc	GGTACAGTAAGTGAGAATCCTCTCT	GGTCTTGACAAACGTGTGCTTGTAC
PA14_17110	1466377..1466396	yes	TATGAGGACGAATCTCCCGCTTATA	TAGTTGGTGGGTTTCCCTACCGTGT	GGTCTCG	tata	TGGCACGCACACATCCTTCC	gttt	tgagacc	GGTACAGTAAGTGAGAATCCTCTCT	GGTCTTGACAAACGTGTGCTTGTAC
PA14_17120	1467151..1467170	yes	TATGAGGACGAATCTCCCGCTTATA	TAGTTGGTGGGTTTCCCTACCGTGT	GGTCTCG	tata	AACCACCCAGCGCGATGGGC	gttt	tgagacc	GGTACAGTAAGTGAGAATCCTCTCT	GGTCTTGACAAACGTGTGCTTGTAC
PA14_17130	1467937..1467956	yes	TATGAGGACGAATCTCCCGCTTATA	TAGTTGGTGGGTTTCCCTACCGTGT	GGTCTCG	tata	CCGAGCACGCTGATCCGCTG	gttt	tgagacc	GGTACAGTAAGTGAGAATCCTCTCT	GGTCTTGACAAACGTGTGCTTGTAC
PA14_17140	1469172..1469191	yes	TATGAGGACGAATCTCCCGCTTATA	TAGTTGGTGGGTTTCCCTACCGTGT	GGTCTCG	tata	CAGCACGCCCAGGGCCACCA	gttt	tgagacc	GGTACAGTAAGTGAGAATCCTCTCT	GGTCTTGACAAACGTGTGCTTGTAC
PA14_17150	1470625..1470644	yes	TATGAGGACGAATCTCCCGCTTATA	TAGTTGGTGGGTTTCCCTACCGTGT	GGTCTCG	tata	ATCGGAAACAGTGAAGGACT	gttt	tgagacc	GGTACAGTAAGTGAGAATCCTCTCT	GGTCTTGACAAACGTGTGCTTGTAC
PA14_17170	1473015..1473034	yes	TATGAGGACGAATCTCCCGCTTATA	TAGTTGGTGGGTTTCCCTACCGTGT	GGTCTCG	tata	TGCGGTGATCAGGACGAACT	gttt	tgagacc	GGTACAGTAAGTGAGAATCCTCTCT	GGTCTTGACAAACGTGTGCTTGTAC
PA14_17180	1473518..1473537	yes	TATGAGGACGAATCTCCCGCTTATA	TAGTTGGTGGGTTTCCCTACCGTGT	GGTCTCG	tata	CTGGCCCAGGGTGTAGGACA	gttt	tgagacc	GGTACAGTAAGTGAGAATCCTCTCT	GGTCTTGACAAACGTGTGCTTGTAC
PA14_17190	1474644..1474663	yes	TATGAGGACGAATCTCCCGCTTATA	TAGTTGGTGGGTTTCCCTACCGTGT	GGTCTCG	tata	GGAAAGGATAGCGATGAGGC	gttt	tgagacc	GGTACAGTAAGTGAGAATCCTCTCT	GGTCTTGACAAACGTGTGCTTGTAC
PA14_17210	1475067..1475086	yes	TATGAGGACGAATCTCCCGCTTATA	TAGTTGGTGGGTTTCCCTACCGTGT	GGTCTCG	tata	CTCGGATCGATGATGGCGCG	gttt	tgagacc	GGTACAGTAAGTGAGAATCCTCTCT	GGTCTTGACAAACGTGTGCTTGTAC
PA14_17220	1475854..1475873	no	TATGAGGACGAATCTCCCGCTTATA	TAGTTGGTGGGTTTCCCTACCGTGT	GGTCTCG	tata	GGAGGCCTCGCCGGCGACCA	gttt	tgagacc	GGTACAGTAAGTGAGAATCCTCTCT	GGTCTTGACAAACGTGTGCTTGTAC
PA14_17230	1476979..1476998	yes	TATGAGGACGAATCTCCCGCTTATA	TAGTTGGTGGGTTTCCCTACCGTGT	GGTCTCG	tata	CCTCCACCAGATTGAAATCC	gttt	tgagacc	GGTACAGTAAGTGAGAATCCTCTCT	GGTCTTGACAAACGTGTGCTTGTAC
PA14_17250	1477803..1477822	yes	TATGAGGACGAATCTCCCGCTTATA	TAGTTGGTGGGTTTCCCTACCGTGT	GGTCTCG	tata	GAGCAGGTCGACGACCTGAG	gttt	tgagacc	GGTACAGTAAGTGAGAATCCTCTCT	GGTCTTGACAAACGTGTGCTTGTAC
PA14_17260	1479339..1479358	yes	TATGAGGACGAATCTCCCGCTTATA	TAGTTGGTGGGTTTCCCTACCGTGT	GGTCTCG	tata	ACGCAGGTGAACGAAGGATA	gttt	tgagacc	GGTACAGTAAGTGAGAATCCTCTCT	GGTCTTGACAAACGTGTGCTTGTAC
PA14_17270	1483011..1483030	yes	TATGAGGACGAATCTCCCGCTTATA	TAGTTGGTGGGTTTCCCTACCGTGT	GGTCTCG	tata	GTTCGAAATCAAGAAAGTTC	gttt	tgagacc	GGTACAGTAAGTGAGAATCCTCTCT	GGTCTTGACAAACGTGTGCTTGTAC
PA14_17280	1484029..1484048	yes	TATGAGGACGAATCTCCCGCTTATA	TAGTTGGTGGGTTTCCCTACCGTGT	GGTCTCG	tata	CGGGATTCGAGCGGCACTGC	gttt	tgagacc	GGTACAGTAAGTGAGAATCCTCTCT	GGTCTTGACAAACGTGTGCTTGTAC
PA14_17290	1485620..1485639	yes	TATGAGGACGAATCTCCCGCTTATA	TAGTTGGTGGGTTTCCCTACCGTGT	GGTCTCG	tata	GCTTGAGCATCGTGATCTTC	gttt	tgagacc	GGTACAGTAAGTGAGAATCCTCTCT	GGTCTTGACAAACGTGTGCTTGTAC
PA14_17310	1487207..1487226	no	TATGAGGACGAATCTCCCGCTTATA	TAGTTGGTGGGTTTCCCTACCGTGT	GGTCTCG	tata	ATGCCGCCGAACAGCACGAA	gttt	tgagacc	GGTACAGTAAGTGAGAATCCTCTCT	GGTCTTGACAAACGTGTGCTTGTAC
PA14_17320	1488073..1488092	yes	TATGAGGACGAATCTCCCGCTTATA	TAGTTGGTGGGTTTCCCTACCGTGT	GGTCTCG	tata	CGCGGGAGTCCAGGACCTCA	gttt	tgagacc	GGTACAGTAAGTGAGAATCCTCTCT	GGTCTTGACAAACGTGTGCTTGTAC
PA14_17330	1489415..1489434	yes	TATGAGGACGAATCTCCCGCTTATA	TAGTTGGTGGGTTTCCCTACCGTGT	GGTCTCG	tata	GCACCACGAACAGCCAGTAG	gttt	tgagacc	GGTACAGTAAGTGAGAATCCTCTCT	GGTCTTGACAAACGTGTGCTTGTAC
PA14_17340	1489715..1489734	yes	TATGAGGACGAATCTCCCGCTTATA	TAGTTGGTGGGTTTCCCTACCGTGT	GGTCTCG	tata	CGTCCAGAAGGCGGGAAGGT	gttt	tgagacc	GGTACAGTAAGTGAGAATCCTCTCT	GGTCTTGACAAACGTGTGCTTGTAC
PA14_17350,PA14_17370	1490688..1490707	yes	TATGAGGACGAATCTCCCGCTTATA	TAGTTGGTGGGTTTCCCTACCGTGT	GGTCTCG	tata	ACAGGGTCGGTTTGTCGGGC	gttt	tgagacc	GGTACAGTAAGTGAGAATCCTCTCT	GGTCTTGACAAACGTGTGCTTGTAC
PA14_17370	1491878..1491897	yes	TATGAGGACGAATCTCCCGCTTATA	TAGTTGGTGGGTTTCCCTACCGTGT	GGTCTCG	tata	GCGTTGGCGAAACGCATTGA	gttt	tgagacc	GGTACAGTAAGTGAGAATCCTCTCT	GGTCTTGACAAACGTGTGCTTGTAC
PA14_17380	1492829..1492848	yes	TATGAGGACGAATCTCCCGCTTATA	TAGTTGGTGGGTTTCCCTACCGTGT	GGTCTCG	tata	CGCGGTGAACTGCCCGGTTT	gttt	tgagacc	GGTACAGTAAGTGAGAATCCTCTCT	GGTCTTGACAAACGTGTGCTTGTAC
PA14_17400	1493042..1493061	yes	TATGAGGACGAATCTCCCGCTTATA	TAGTTGGTGGGTTTCCCTACCGTGT	GGTCTCG	tata	GTTGGGGGCGAAGGCGACGG	gttt	tgagacc	GGTACAGTAAGTGAGAATCCTCTCT	GGTCTTGACAAACGTGTGCTTGTAC
PA14_17410	1494202..1494221	yes	TATGAGGACGAATCTCCCGCTTATA	TAGTTGGTGGGTTTCCCTACCGTGT	GGTCTCG	tata	CTGGCTGCCGATCAGTTCGA	gttt	tgagacc	GGTACAGTAAGTGAGAATCCTCTCT	GGTCTTGACAAACGTGTGCTTGTAC
PA14_17420	1495125..1495144	yes	TATGAGGACGAATCTCCCGCTTATA	TAGTTGGTGGGTTTCCCTACCGTGT	GGTCTCG	tata	AGCGATGCACGTCGTAGCCA	gttt	tgagacc	GGTACAGTAAGTGAGAATCCTCTCT	GGTCTTGACAAACGTGTGCTTGTAC
PA14_17440	1495617..1495636	yes	TATGAGGACGAATCTCCCGCTTATA	TAGTTGGTGGGTTTCCCTACCGTGT	GGTCTCG	tata	CAGGCTGCCCCATGGGCGCG	gttt	tgagacc	GGTACAGTAAGTGAGAATCCTCTCT	GGTCTTGACAAACGTGTGCTTGTAC
PA14_17450	1496655..1496674	yes	TATGAGGACGAATCTCCCGCTTATA	TAGTTGGTGGGTTTCCCTACCGTGT	GGTCTCG	tata	TGCGGTCACCCCGTCGTCGT	gttt	tgagacc	GGTACAGTAAGTGAGAATCCTCTCT	GGTCTTGACAAACGTGTGCTTGTAC
PA14_17460	1497425..1497444	yes	TATGAGGACGAATCTCCCGCTTATA	TAGTTGGTGGGTTTCCCTACCGTGT	GGTCTCG	tata	GCGCTCTCGGGTACGCTGGG	gttt	tgagacc	GGTACAGTAAGTGAGAATCCTCTCT	GGTCTTGACAAACGTGTGCTTGTAC
PA14_17470	1498136..1498155	yes	TATGAGGACGAATCTCCCGCTTATA	TAGTTGGTGGGTTTCCCTACCGTGT	GGTCTCG	tata	GAGCCGAGTCCATTGCCGCA	gttt	tgagacc	GGTACAGTAAGTGAGAATCCTCTCT	GGTCTTGACAAACGTGTGCTTGTAC
PA14_17480	1499121..1499140	yes	TATGAGGACGAATCTCCCGCTTATA	TAGTTGGTGGGTTTCCCTACCGTGT	GGTCTCG	tata	TCATCATCGTGGTCAAACTC	gttt	tgagacc	GGTACAGTAAGTGAGAATCCTCTCT	GGTCTTGACAAACGTGTGCTTGTAC
PA14_17490	1500824..1500843	yes	TATGAGGACGAATCTCCCGCTTATA	TAGTTGGTGGGTTTCCCTACCGTGT	GGTCTCG	tata	GCAGTTGTCGGTGACGACGA	gttt	tgagacc	GGTACAGTAAGTGAGAATCCTCTCT	GGTCTTGACAAACGTGTGCTTGTAC
PA14_17500	1503458..1503477	yes	TATGAGGACGAATCTCCCGCTTATA	TAGTTGGTGGGTTTCCCTACCGTGT	GGTCTCG	tata	TGGCGTGTGCTGAGAGAGGT	gttt	tgagacc	GGTACAGTAAGTGAGAATCCTCTCT	GGTCTTGACAAACGTGTGCTTGTAC
PA14_17510	1504560..1504579	yes	TATGAGGACGAATCTCCCGCTTATA	TAGTTGGTGGGTTTCCCTACCGTGT	GGTCTCG	tata	CGGGGGAGAGGAGCAGGGCG	gttt	tgagacc	GGTACAGTAAGTGAGAATCCTCTCT	GGTCTTGACAAACGTGTGCTTGTAC
PA14_17520	1504772..1504791	yes	TATGAGGACGAATCTCCCGCTTATA	TAGTTGGTGGGTTTCCCTACCGTGT	GGTCTCG	tata	GGTCAGGTCGGACTCCATCA	gttt	tgagacc	GGTACAGTAAGTGAGAATCCTCTCT	GGTCTTGACAAACGTGTGCTTGTAC
PA14_17530	1505431..1505450	yes	TATGAGGACGAATCTCCCGCTTATA	TAGTTGGTGGGTTTCCCTACCGTGT	GGTCTCG	tata	TCTGTCCCAGGGCCGCGGCC	gttt	tgagacc	GGTACAGTAAGTGAGAATCCTCTCT	GGTCTTGACAAACGTGTGCTTGTAC
PA14_17540	1506461..1506480	yes	TATGAGGACGAATCTCCCGCTTATA	TAGTTGGTGGGTTTCCCTACCGTGT	GGTCTCG	tata	GGCGACGGGCGTATCGAGCA	gttt	tgagacc	GGTACAGTAAGTGAGAATCCTCTCT	GGTCTTGACAAACGTGTGCTTGTAC
PA14_17550	1507979..1507998	yes	TATGAGGACGAATCTCCCGCTTATA	TAGTTGGTGGGTTTCCCTACCGTGT	GGTCTCG	tata	AGATAGTCATCGGCTTCGTA	gttt	tgagacc	GGTACAGTAAGTGAGAATCCTCTCT	GGTCTTGACAAACGTGTGCTTGTAC
PA14_17570	1509443..1509462	yes	TATGAGGACGAATCTCCCGCTTATA	TAGTTGGTGGGTTTCCCTACCGTGT	GGTCTCG	tata	GGAGCCAGTGACCTCCTGGG	gttt	tgagacc	GGTACAGTAAGTGAGAATCCTCTCT	GGTCTTGACAAACGTGTGCTTGTAC
PA14_17580	1509688..1509707	yes	TATGAGGACGAATCTCCCGCTTATA	TAGTTGGTGGGTTTCCCTACCGTGT	GGTCTCG	tata	GCAAGCAACTCGTCCTGACT	gttt	tgagacc	GGTACAGTAAGTGAGAATCCTCTCT	GGTCTTGACAAACGTGTGCTTGTAC
PA14_17590	1512367..1512386	yes	TATGAGGACGAATCTCCCGCTTATA	TAGTTGGTGGGTTTCCCTACCGTGT	GGTCTCG	tata	GCCGAACGGCATCGGCGTTC	gttt	tgagacc	GGTACAGTAAGTGAGAATCCTCTCT	GGTCTTGACAAACGTGTGCTTGTAC
PA14_17600	1512811..1512830	yes	TATGAGGACGAATCTCCCGCTTATA	TAGTTGGTGGGTTTCCCTACCGTGT	GGTCTCG	tata	CAGGACGAAACAAAGGGCAA	gttt	tgagacc	GGTACAGTAAGTGAGAATCCTCTCT	GGTCTTGACAAACGTGTGCTTGTAC
PA14_17610	1514039..1514058	yes	TATGAGGACGAATCTCCCGCTTATA	TAGTTGGTGGGTTTCCCTACCGTGT	GGTCTCG	tata	CTGGGCGGCTCCTGCCATGA	gttt	tgagacc	GGTACAGTAAGTGAGAATCCTCTCT	GGTCTTGACAAACGTGTGCTTGTAC
PA14_17620	1514917..1514936	yes	TATGAGGACGAATCTCCCGCTTATA	TAGTTGGTGGGTTTCCCTACCGTGT	GGTCTCG	tata	GTGGCGCTCCAGAGCAGGTA	gttt	tgagacc	GGTACAGTAAGTGAGAATCCTCTCT	GGTCTTGACAAACGTGTGCTTGTAC
PA14_17630	1515801..1515820	yes	TATGAGGACGAATCTCCCGCTTATA	TAGTTGGTGGGTTTCCCTACCGTGT	GGTCTCG	tata	AGACCAGCAGCCACTTGCCG	gttt	tgagacc	GGTACAGTAAGTGAGAATCCTCTCT	GGTCTTGACAAACGTGTGCTTGTAC
PA14_17640	1516902..1516921	yes	TATGAGGACGAATCTCCCGCTTATA	TAGTTGGTGGGTTTCCCTACCGTGT	GGTCTCG	tata	TTGCGGATCTCGAGCAAGGG	gttt	tgagacc	GGTACAGTAAGTGAGAATCCTCTCT	GGTCTTGACAAACGTGTGCTTGTAC
PA14_17650	1517197..1517216	yes	TATGAGGACGAATCTCCCGCTTATA	TAGTTGGTGGGTTTCCCTACCGTGT	GGTCTCG	tata	GGCGCAAGCGGGAAACGGCA	gttt	tgagacc	GGTACAGTAAGTGAGAATCCTCTCT	GGTCTTGACAAACGTGTGCTTGTAC
PA14_17660	1518805..1518824	yes	TATGAGGACGAATCTCCCGCTTATA	TAGTTGGTGGGTTTCCCTACCGTGT	GGTCTCG	tata	CTCGCTCGACGGGGCGGGGA	gttt	tgagacc	GGTACAGTAAGTGAGAATCCTCTCT	GGTCTTGACAAACGTGTGCTTGTAC
PA14_17670	1518996..1519015	yes	TATGAGGACGAATCTCCCGCTTATA	TAGTTGGTGGGTTTCCCTACCGTGT	GGTCTCG	tata	GCGAAACAGGGGGTGATCGT	gttt	tgagacc	GGTACAGTAAGTGAGAATCCTCTCT	GGTCTTGACAAACGTGTGCTTGTAC
PA14_17675	1519702..1519721	no	TATGAGGACGAATCTCCCGCTTATA	TAGTTGGTGGGTTTCCCTACCGTGT	GGTCTCG	tata	GTCTGGCCTTTGAAGGGGGA	gttt	tgagacc	GGTACAGTAAGTGAGAATCCTCTCT	GGTCTTGACAAACGTGTGCTTGTAC
PA14_17690	1521685..1521704	yes	TATGAGGACGAATCTCCCGCTTATA	TAGTTGGTGGGTTTCCCTACCGTGT	GGTCTCG	tata	CAAGGTGAACAGGGCGATAC	gttt	tgagacc	GGTACAGTAAGTGAGAATCCTCTCT	GGTCTTGACAAACGTGTGCTTGTAC
PA14_17700	1521997..1522016	yes	TATGAGGACGAATCTCCCGCTTATA	TAGTTGGTGGGTTTCCCTACCGTGT	GGTCTCG	tata	CGGTATTCGGGATGGATGCC	gttt	tgagacc	GGTACAGTAAGTGAGAATCCTCTCT	GGTCTTGACAAACGTGTGCTTGTAC
PA14_17710	1522262..1522281	yes	TATGAGGACGAATCTCCCGCTTATA	TAGTTGGTGGGTTTCCCTACCGTGT	GGTCTCG	tata	TGGCCTGTTTCAGCGAGGCG	gttt	tgagacc	GGTACAGTAAGTGAGAATCCTCTCT	GGTCTTGACAAACGTGTGCTTGTAC
PA14_17720	1523169..1523188	yes	TATGAGGACGAATCTCCCGCTTATA	TAGTTGGTGGGTTTCCCTACCGTGT	GGTCTCG	tata	TTGCCCGACGGAGCGGTGCC	gttt	tgagacc	GGTACAGTAAGTGAGAATCCTCTCT	GGTCTTGACAAACGTGTGCTTGTAC
PA14_17730	1523364..1523383	yes	TATGAGGACGAATCTCCCGCTTATA	TAGTTGGTGGGTTTCCCTACCGTGT	GGTCTCG	tata	CGCCATCGCGACCGGCGATC	gttt	tgagacc	GGTACAGTAAGTGAGAATCCTCTCT	GGTCTTGACAAACGTGTGCTTGTAC
PA14_17740	1524366..1524385	yes	TATGAGGACGAATCTCCCGCTTATA	TAGTTGGTGGGTTTCCCTACCGTGT	GGTCTCG	tata	CGACAGGGTGCGCTTGAGTC	gttt	tgagacc	GGTACAGTAAGTGAGAATCCTCTCT	GGTCTTGACAAACGTGTGCTTGTAC
PA14_17760	1525778..1525797	yes	TATGAGGACGAATCTCCCGCTTATA	TAGTTGGTGGGTTTCCCTACCGTGT	GGTCTCG	tata	GGGAAGGAACAACGCTGCGT	gttt	tgagacc	GGTACAGTAAGTGAGAATCCTCTCT	GGTCTTGACAAACGTGTGCTTGTAC
PA14_17780	1528225..1528244	yes	TATGAGGACGAATCTCCCGCTTATA	TAGTTGGTGGGTTTCCCTACCGTGT	GGTCTCG	tata	TCTTCGGGAGAGGGCGTGCG	gttt	tgagacc	GGTACAGTAAGTGAGAATCCTCTCT	GGTCTTGACAAACGTGTGCTTGTAC
PA14_17790	1529297..1529316	yes	TATGAGGACGAATCTCCCGCTTATA	TAGTTGGTGGGTTTCCCTACCGTGT	GGTCTCG	tata	GCGTCCGAAATGCAGTTCCT	gttt	tgagacc	GGTACAGTAAGTGAGAATCCTCTCT	GGTCTTGACAAACGTGTGCTTGTAC
PA14_17810	1529480..1529499	yes	TATGAGGACGAATCTCCCGCTTATA	TAGTTGGTGGGTTTCCCTACCGTGT	GGTCTCG	tata	TTCGCGAGGTACTTCGGGCA	gttt	tgagacc	GGTACAGTAAGTGAGAATCCTCTCT	GGTCTTGACAAACGTGTGCTTGTAC
PA14_17820	1531243..1531262	yes	TATGAGGACGAATCTCCCGCTTATA	TAGTTGGTGGGTTTCCCTACCGTGT	GGTCTCG	tata	ACGCAGGGCGCCCGTCTGAT	gttt	tgagacc	GGTACAGTAAGTGAGAATCCTCTCT	GGTCTTGACAAACGTGTGCTTGTAC
PA14_17850	1532493..1532512	yes	TATGAGGACGAATCTCCCGCTTATA	TAGTTGGTGGGTTTCCCTACCGTGT	GGTCTCG	tata	GGGGCTCACCGCCCCAGGGG	gttt	tgagacc	GGTACAGTAAGTGAGAATCCTCTCT	GGTCTTGACAAACGTGTGCTTGTAC
PA14_17860	1533289..1533308	yes	TATGAGGACGAATCTCCCGCTTATA	TAGTTGGTGGGTTTCCCTACCGTGT	GGTCTCG	tata	ATACCGATGAGAACGATCGA	gttt	tgagacc	GGTACAGTAAGTGAGAATCCTCTCT	GGTCTTGACAAACGTGTGCTTGTAC
PA14_17880	1534845..1534864	yes	TATGAGGACGAATCTCCCGCTTATA	TAGTTGGTGGGTTTCCCTACCGTGT	GGTCTCG	tata	ACGCAGGCCGGCGTAGATAT	gttt	tgagacc	GGTACAGTAAGTGAGAATCCTCTCT	GGTCTTGACAAACGTGTGCTTGTAC
PA14_17890	1536122..1536141	yes	TATGAGGACGAATCTCCCGCTTATA	TAGTTGGTGGGTTTCCCTACCGTGT	GGTCTCG	tata	CGCCGGCAAGGATCGGCAGC	gttt	tgagacc	GGTACAGTAAGTGAGAATCCTCTCT	GGTCTTGACAAACGTGTGCTTGTAC
PA14_17900	1538230..1538249	yes	TATGAGGACGAATCTCCCGCTTATA	TAGTTGGTGGGTTTCCCTACCGTGT	GGTCTCG	tata	GCGCGTGCAGGGTCTTGAGG	gttt	tgagacc	GGTACAGTAAGTGAGAATCCTCTCT	GGTCTTGACAAACGTGTGCTTGTAC
PA14_17910	1538585..1538604	yes	TATGAGGACGAATCTCCCGCTTATA	TAGTTGGTGGGTTTCCCTACCGTGT	GGTCTCG	tata	GGCTGCACAACAAGGCGGCC	gttt	tgagacc	GGTACAGTAAGTGAGAATCCTCTCT	GGTCTTGACAAACGTGTGCTTGTAC
PA14_17920	1539853..1539872	yes	TATGAGGACGAATCTCCCGCTTATA	TAGTTGGTGGGTTTCCCTACCGTGT	GGTCTCG	tata	GGCGAGGAGCACGACCACGG	gttt	tgagacc	GGTACAGTAAGTGAGAATCCTCTCT	GGTCTTGACAAACGTGTGCTTGTAC
PA14_17930	1541530..1541549	yes	TATGAGGACGAATCTCCCGCTTATA	TAGTTGGTGGGTTTCCCTACCGTGT	GGTCTCG	tata	TTCGGCGAGTGGAGCGGAGG	gttt	tgagacc	GGTACAGTAAGTGAGAATCCTCTCT	GGTCTTGACAAACGTGTGCTTGTAC
PA14_17940	1542575..1542594	yes	TATGAGGACGAATCTCCCGCTTATA	TAGTTGGTGGGTTTCCCTACCGTGT	GGTCTCG	tata	TGCTTTGCTGTCGGGGGGGC	gttt	tgagacc	GGTACAGTAAGTGAGAATCCTCTCT	GGTCTTGACAAACGTGTGCTTGTAC
PA14_17960	1544299..1544318	yes	TATGAGGACGAATCTCCCGCTTATA	TAGTTGGTGGGTTTCCCTACCGTGT	GGTCTCG	tata	GTATTTCTTGTTGTGCTTGT	gttt	tgagacc	GGTACAGTAAGTGAGAATCCTCTCT	GGTCTTGACAAACGTGTGCTTGTAC
PA14_17980	1545178..1545197	yes	TATGAGGACGAATCTCCCGCTTATA	TAGTTGGTGGGTTTCCCTACCGTGT	GGTCTCG	tata	GGACGGGGTCGGGGCGGCGG	gttt	tgagacc	GGTACAGTAAGTGAGAATCCTCTCT	GGTCTTGACAAACGTGTGCTTGTAC
PA14_17990	1545476..1545495	yes	TATGAGGACGAATCTCCCGCTTATA	TAGTTGGTGGGTTTCCCTACCGTGT	GGTCTCG	tata	TTTCAGCAGGTCGATGGCAG	gttt	tgagacc	GGTACAGTAAGTGAGAATCCTCTCT	GGTCTTGACAAACGTGTGCTTGTAC
PA14_18010	1546010..1546029	yes	TATGAGGACGAATCTCCCGCTTATA	TAGTTGGTGGGTTTCCCTACCGTGT	GGTCTCG	tata	GTCGATGGCGAGGAGATAGT	gttt	tgagacc	GGTACAGTAAGTGAGAATCCTCTCT	GGTCTTGACAAACGTGTGCTTGTAC
PA14_18020	1547700..1547719	yes	TATGAGGACGAATCTCCCGCTTATA	TAGTTGGTGGGTTTCCCTACCGTGT	GGTCTCG	tata	AAGAAAACGCGTCGACCTGG	gttt	tgagacc	GGTACAGTAAGTGAGAATCCTCTCT	GGTCTTGACAAACGTGTGCTTGTAC
PA14_18040	1549293..1549312	yes	TATGAGGACGAATCTCCCGCTTATA	TAGTTGGTGGGTTTCCCTACCGTGT	GGTCTCG	tata	CACCACTCGGAGGGCAAGCC	gttt	tgagacc	GGTACAGTAAGTGAGAATCCTCTCT	GGTCTTGACAAACGTGTGCTTGTAC
PA14_18050	1549966..1549985	yes	TATGAGGACGAATCTCCCGCTTATA	TAGTTGGTGGGTTTCCCTACCGTGT	GGTCTCG	tata	GGAGCAGCGGGCGAAGGATG	gttt	tgagacc	GGTACAGTAAGTGAGAATCCTCTCT	GGTCTTGACAAACGTGTGCTTGTAC
PA14_18060	1550596..1550615	yes	TATGAGGACGAATCTCCCGCTTATA	TAGTTGGTGGGTTTCCCTACCGTGT	GGTCTCG	tata	TGACGGGGAATAGCGGCGGA	gttt	tgagacc	GGTACAGTAAGTGAGAATCCTCTCT	GGTCTTGACAAACGTGTGCTTGTAC
PA14_18070	1550836..1550855	yes	TATGAGGACGAATCTCCCGCTTATA	TAGTTGGTGGGTTTCCCTACCGTGT	GGTCTCG	tata	CGCCCGTACGCAGTGGCCGC	gttt	tgagacc	GGTACAGTAAGTGAGAATCCTCTCT	GGTCTTGACAAACGTGTGCTTGTAC
PA14_18080	1551566..1551585	yes	TATGAGGACGAATCTCCCGCTTATA	TAGTTGGTGGGTTTCCCTACCGTGT	GGTCTCG	tata	GGCCAGGAGGATGGCCGTAC	gttt	tgagacc	GGTACAGTAAGTGAGAATCCTCTCT	GGTCTTGACAAACGTGTGCTTGTAC
PA14_18090	1552002..1552021	yes	TATGAGGACGAATCTCCCGCTTATA	TAGTTGGTGGGTTTCCCTACCGTGT	GGTCTCG	tata	TCAGGGCTCCCAGTATCAGC	gttt	tgagacc	GGTACAGTAAGTGAGAATCCTCTCT	GGTCTTGACAAACGTGTGCTTGTAC
PA14_18100	1553317..1553336	yes	TATGAGGACGAATCTCCCGCTTATA	TAGTTGGTGGGTTTCCCTACCGTGT	GGTCTCG	tata	GGGTTTGCGACGGGCGGACG	gttt	tgagacc	GGTACAGTAAGTGAGAATCCTCTCT	GGTCTTGACAAACGTGTGCTTGTAC
PA14_18110	1554357..1554376	yes	TATGAGGACGAATCTCCCGCTTATA	TAGTTGGTGGGTTTCCCTACCGTGT	GGTCTCG	tata	GTGTGCGACATGTCGGTAGC	gttt	tgagacc	GGTACAGTAAGTGAGAATCCTCTCT	GGTCTTGACAAACGTGTGCTTGTAC
PA14_18120	1554540..1554559	yes	TATGAGGACGAATCTCCCGCTTATA	TAGTTGGTGGGTTTCCCTACCGTGT	GGTCTCG	tata	CCGCGATGAGGTGGCGGACT	gttt	tgagacc	GGTACAGTAAGTGAGAATCCTCTCT	GGTCTTGACAAACGTGTGCTTGTAC
PA14_18140	1556045..1556064	yes	TATGAGGACGAATCTCCCGCTTATA	TAGTTGGTGGGTTTCCCTACCGTGT	GGTCTCG	tata	CAGGCCGAGGAATGCGATGT	gttt	tgagacc	GGTACAGTAAGTGAGAATCCTCTCT	GGTCTTGACAAACGTGTGCTTGTAC
PA14_18150	1557047..1557066	yes	TATGAGGACGAATCTCCCGCTTATA	TAGTTGGTGGGTTTCCCTACCGTGT	GGTCTCG	tata	TCGAGCGGGCGTGCTGCTGC	gttt	tgagacc	GGTACAGTAAGTGAGAATCCTCTCT	GGTCTTGACAAACGTGTGCTTGTAC
PA14_18160	1559951..1559970	yes	TATGAGGACGAATCTCCCGCTTATA	TAGTTGGTGGGTTTCCCTACCGTGT	GGTCTCG	tata	GATGGTCGATGGGCAGGGAT	gttt	tgagacc	GGTACAGTAAGTGAGAATCCTCTCT	GGTCTTGACAAACGTGTGCTTGTAC
PA14_18180	1560277..1560296	yes	TATGAGGACGAATCTCCCGCTTATA	TAGTTGGTGGGTTTCCCTACCGTGT	GGTCTCG	tata	ATGGTGGCGATCAGGGTGAG	gttt	tgagacc	GGTACAGTAAGTGAGAATCCTCTCT	GGTCTTGACAAACGTGTGCTTGTAC
PA14_18200	1560424..1560443	yes	TATGAGGACGAATCTCCCGCTTATA	TAGTTGGTGGGTTTCCCTACCGTGT	GGTCTCG	tata	TGGTGTGGACGAACACCTGG	gttt	tgagacc	GGTACAGTAAGTGAGAATCCTCTCT	GGTCTTGACAAACGTGTGCTTGTAC
PA14_18210	1562250..1562269	yes	TATGAGGACGAATCTCCCGCTTATA	TAGTTGGTGGGTTTCCCTACCGTGT	GGTCTCG	tata	AGACCCGTTGCCAGTTCTCG	gttt	tgagacc	GGTACAGTAAGTGAGAATCCTCTCT	GGTCTTGACAAACGTGTGCTTGTAC
PA14_18230	1563326..1563345	yes	TATGAGGACGAATCTCCCGCTTATA	TAGTTGGTGGGTTTCCCTACCGTGT	GGTCTCG	tata	ATTGATGACGTAGCTGGCGG	gttt	tgagacc	GGTACAGTAAGTGAGAATCCTCTCT	GGTCTTGACAAACGTGTGCTTGTAC
PA14_18250	1563748..1563767	yes	TATGAGGACGAATCTCCCGCTTATA	TAGTTGGTGGGTTTCCCTACCGTGT	GGTCTCG	tata	CCGCGGCGCGCTGGCCCATG	gttt	tgagacc	GGTACAGTAAGTGAGAATCCTCTCT	GGTCTTGACAAACGTGTGCTTGTAC
PA14_18260	1566603..1566622	yes	TATGAGGACGAATCTCCCGCTTATA	TAGTTGGTGGGTTTCCCTACCGTGT	GGTCTCG	tata	CCGGATTCAGGGTAATCGTC	gttt	tgagacc	GGTACAGTAAGTGAGAATCCTCTCT	GGTCTTGACAAACGTGTGCTTGTAC
PA14_18275	1567557..1567576	yes	TATGAGGACGAATCTCCCGCTTATA	TAGTTGGTGGGTTTCCCTACCGTGT	GGTCTCG	tata	GACCTGTCCGCCAGGGCAGG	gttt	tgagacc	GGTACAGTAAGTGAGAATCCTCTCT	GGTCTTGACAAACGTGTGCTTGTAC
PA14_18300	1570771..1570790	yes	TATGAGGACGAATCTCCCGCTTATA	TAGTTGGTGGGTTTCCCTACCGTGT	GGTCTCG	tata	GCCCACTTCGGCGAGGACGG	gttt	tgagacc	GGTACAGTAAGTGAGAATCCTCTCT	GGTCTTGACAAACGTGTGCTTGTAC
PA14_18310	1571172..1571191	yes	TATGAGGACGAATCTCCCGCTTATA	TAGTTGGTGGGTTTCCCTACCGTGT	GGTCTCG	tata	CCAGCGCATGCCGAGCTGGG	gttt	tgagacc	GGTACAGTAAGTGAGAATCCTCTCT	GGTCTTGACAAACGTGTGCTTGTAC
PA14_18320	1571564..1571583	yes	TATGAGGACGAATCTCCCGCTTATA	TAGTTGGTGGGTTTCCCTACCGTGT	GGTCTCG	tata	CAGGGTGGCGAGCAGCAGCG	gttt	tgagacc	GGTACAGTAAGTGAGAATCCTCTCT	GGTCTTGACAAACGTGTGCTTGTAC
PA14_18330	1573212..1573231	yes	TATGAGGACGAATCTCCCGCTTATA	TAGTTGGTGGGTTTCCCTACCGTGT	GGTCTCG	tata	GCAGCGACCAGGTCTGGCGG	gttt	tgagacc	GGTACAGTAAGTGAGAATCCTCTCT	GGTCTTGACAAACGTGTGCTTGTAC
PA14_18340	1574096..1574115	yes	TATGAGGACGAATCTCCCGCTTATA	TAGTTGGTGGGTTTCCCTACCGTGT	GGTCTCG	tata	CGTCGATGCGCAGGCCGGCC	gttt	tgagacc	GGTACAGTAAGTGAGAATCCTCTCT	GGTCTTGACAAACGTGTGCTTGTAC
PA14_18350	1576082..1576101	yes	TATGAGGACGAATCTCCCGCTTATA	TAGTTGGTGGGTTTCCCTACCGTGT	GGTCTCG	tata	GGCGAAGACGACGGCTTTCG	gttt	tgagacc	GGTACAGTAAGTGAGAATCCTCTCT	GGTCTTGACAAACGTGTGCTTGTAC
PA14_18360	1577064..1577083	yes	TATGAGGACGAATCTCCCGCTTATA	TAGTTGGTGGGTTTCCCTACCGTGT	GGTCTCG	tata	TGGCTTCCTCGTTGTAGACC	gttt	tgagacc	GGTACAGTAAGTGAGAATCCTCTCT	GGTCTTGACAAACGTGTGCTTGTAC
PA14_18370	1578229..1578248	yes	TATGAGGACGAATCTCCCGCTTATA	TAGTTGGTGGGTTTCCCTACCGTGT	GGTCTCG	tata	CCGATGCTTGGCCGGGAGAA	gttt	tgagacc	GGTACAGTAAGTGAGAATCCTCTCT	GGTCTTGACAAACGTGTGCTTGTAC
PA14_18380	1580075..1580094	yes	TATGAGGACGAATCTCCCGCTTATA	TAGTTGGTGGGTTTCCCTACCGTGT	GGTCTCG	tata	TGCCACCGGAAAGGATTACT	gttt	tgagacc	GGTACAGTAAGTGAGAATCCTCTCT	GGTCTTGACAAACGTGTGCTTGTAC
PA14_18410	1580922..1580941	yes	TATGAGGACGAATCTCCCGCTTATA	TAGTTGGTGGGTTTCCCTACCGTGT	GGTCTCG	tata	AGGTGTGGCGGCGGGTCATC	gttt	tgagacc	GGTACAGTAAGTGAGAATCCTCTCT	GGTCTTGACAAACGTGTGCTTGTAC
PA14_18430	1582159..1582178	yes	TATGAGGACGAATCTCCCGCTTATA	TAGTTGGTGGGTTTCCCTACCGTGT	GGTCTCG	tata	ATAGGCGTATTGCAGGGGGC	gttt	tgagacc	GGTACAGTAAGTGAGAATCCTCTCT	GGTCTTGACAAACGTGTGCTTGTAC
PA14_18450	1583729..1583748	yes	TATGAGGACGAATCTCCCGCTTATA	TAGTTGGTGGGTTTCCCTACCGTGT	GGTCTCG	tata	AGACCGGCAGGAACAGGAAC	gttt	tgagacc	GGTACAGTAAGTGAGAATCCTCTCT	GGTCTTGACAAACGTGTGCTTGTAC
PA14_18470	1585087..1585106	yes	TATGAGGACGAATCTCCCGCTTATA	TAGTTGGTGGGTTTCCCTACCGTGT	GGTCTCG	tata	CAGGGCGATACGGATCAGGT	gttt	tgagacc	GGTACAGTAAGTGAGAATCCTCTCT	GGTCTTGACAAACGTGTGCTTGTAC
PA14_18480	1586518..1586537	yes	TATGAGGACGAATCTCCCGCTTATA	TAGTTGGTGGGTTTCCCTACCGTGT	GGTCTCG	tata	GCGGAACAGTCGGGAAGTGC	gttt	tgagacc	GGTACAGTAAGTGAGAATCCTCTCT	GGTCTTGACAAACGTGTGCTTGTAC
PA14_18500	1588166..1588185	yes	TATGAGGACGAATCTCCCGCTTATA	TAGTTGGTGGGTTTCCCTACCGTGT	GGTCTCG	tata	GGGATCGAAAGGGAAATGTC	gttt	tgagacc	GGTACAGTAAGTGAGAATCCTCTCT	GGTCTTGACAAACGTGTGCTTGTAC
PA14_18510	1589652..1589671	no	TATGAGGACGAATCTCCCGCTTATA	TAGTTGGTGGGTTTCCCTACCGTGT	GGTCTCG	tata	CGGCCGCGGGTTGACGGAAC	gttt	tgagacc	GGTACAGTAAGTGAGAATCCTCTCT	GGTCTTGACAAACGTGTGCTTGTAC
PA14_18520	1591077..1591096	yes	TATGAGGACGAATCTCCCGCTTATA	TAGTTGGTGGGTTTCCCTACCGTGT	GGTCTCG	tata	AGGGGCAGGGGAGGGAGGAT	gttt	tgagacc	GGTACAGTAAGTGAGAATCCTCTCT	GGTCTTGACAAACGTGTGCTTGTAC
PA14_18550	1592259..1592278	yes	TATGAGGACGAATCTCCCGCTTATA	TAGTTGGTGGGTTTCCCTACCGTGT	GGTCTCG	tata	GTGCACGACGTTGACGTTGA	gttt	tgagacc	GGTACAGTAAGTGAGAATCCTCTCT	GGTCTTGACAAACGTGTGCTTGTAC
PA14_18565	1593808..1593827	yes	TATGAGGACGAATCTCCCGCTTATA	TAGTTGGTGGGTTTCCCTACCGTGT	GGTCTCG	tata	CACCAGCCAGCCGGTGGCTT	gttt	tgagacc	GGTACAGTAAGTGAGAATCCTCTCT	GGTCTTGACAAACGTGTGCTTGTAC
PA14_18580	1595233..1595252	yes	TATGAGGACGAATCTCCCGCTTATA	TAGTTGGTGGGTTTCCCTACCGTGT	GGTCTCG	tata	CTTCATGACCGCGTGCCGAC	gttt	tgagacc	GGTACAGTAAGTGAGAATCCTCTCT	GGTCTTGACAAACGTGTGCTTGTAC
PA14_18590	1596952..1596971	yes	TATGAGGACGAATCTCCCGCTTATA	TAGTTGGTGGGTTTCCCTACCGTGT	GGTCTCG	tata	GTAGTCCAGGGTCTTGGCGG	gttt	tgagacc	GGTACAGTAAGTGAGAATCCTCTCT	GGTCTTGACAAACGTGTGCTTGTAC
PA14_18600	1598152..1598171	yes	TATGAGGACGAATCTCCCGCTTATA	TAGTTGGTGGGTTTCCCTACCGTGT	GGTCTCG	tata	TCAGGTTCAGCAGCAGGTCG	gttt	tgagacc	GGTACAGTAAGTGAGAATCCTCTCT	GGTCTTGACAAACGTGTGCTTGTAC
PA14_18610	1599040..1599059	yes	TATGAGGACGAATCTCCCGCTTATA	TAGTTGGTGGGTTTCCCTACCGTGT	GGTCTCG	tata	ATCAGACCGATCAGCTCTTC	gttt	tgagacc	GGTACAGTAAGTGAGAATCCTCTCT	GGTCTTGACAAACGTGTGCTTGTAC
PA14_18620	1599404..1599423	yes	TATGAGGACGAATCTCCCGCTTATA	TAGTTGGTGGGTTTCCCTACCGTGT	GGTCTCG	tata	GTGTGCATGCTCGACCTCCC	gttt	tgagacc	GGTACAGTAAGTGAGAATCCTCTCT	GGTCTTGACAAACGTGTGCTTGTAC
PA14_18625	1600062..1600081	yes	TATGAGGACGAATCTCCCGCTTATA	TAGTTGGTGGGTTTCCCTACCGTGT	GGTCTCG	tata	TGGAAGGGATAGTACAGCGC	gttt	tgagacc	GGTACAGTAAGTGAGAATCCTCTCT	GGTCTTGACAAACGTGTGCTTGTAC
PA14_18630	1603202..1603221	yes	TATGAGGACGAATCTCCCGCTTATA	TAGTTGGTGGGTTTCCCTACCGTGT	GGTCTCG	tata	AGGGCGGAAGGAGTGGTCGT	gttt	tgagacc	GGTACAGTAAGTGAGAATCCTCTCT	GGTCTTGACAAACGTGTGCTTGTAC
PA14_18640	1603540..1603559	yes	TATGAGGACGAATCTCCCGCTTATA	TAGTTGGTGGGTTTCCCTACCGTGT	GGTCTCG	tata	ATGGCACGCACGGTAGTGGA	gttt	tgagacc	GGTACAGTAAGTGAGAATCCTCTCT	GGTCTTGACAAACGTGTGCTTGTAC
PA14_18650	1605767..1605786	yes	TATGAGGACGAATCTCCCGCTTATA	TAGTTGGTGGGTTTCCCTACCGTGT	GGTCTCG	tata	GTTGGCGATCTGCTCTTTAA	gttt	tgagacc	GGTACAGTAAGTGAGAATCCTCTCT	GGTCTTGACAAACGTGTGCTTGTAC
PA14_18660	1606175..1606194	yes	TATGAGGACGAATCTCCCGCTTATA	TAGTTGGTGGGTTTCCCTACCGTGT	GGTCTCG	tata	CAAGCCAGGCGACCCTGGCG	gttt	tgagacc	GGTACAGTAAGTGAGAATCCTCTCT	GGTCTTGACAAACGTGTGCTTGTAC
PA14_18670	1607807..1607826	yes	TATGAGGACGAATCTCCCGCTTATA	TAGTTGGTGGGTTTCCCTACCGTGT	GGTCTCG	tata	CGAGGATCTTGTTGAGGTGC	gttt	tgagacc	GGTACAGTAAGTGAGAATCCTCTCT	GGTCTTGACAAACGTGTGCTTGTAC
PA14_18680	1608250..1608269	yes	TATGAGGACGAATCTCCCGCTTATA	TAGTTGGTGGGTTTCCCTACCGTGT	GGTCTCG	tata	TGTCGGTAACACCTTGGCAG	gttt	tgagacc	GGTACAGTAAGTGAGAATCCTCTCT	GGTCTTGACAAACGTGTGCTTGTAC
PA14_18690	1608573..1608592	yes	TATGAGGACGAATCTCCCGCTTATA	TAGTTGGTGGGTTTCCCTACCGTGT	GGTCTCG	tata	ACCGCGGCAACGTTGAAGTC	gttt	tgagacc	GGTACAGTAAGTGAGAATCCTCTCT	GGTCTTGACAAACGTGTGCTTGTAC
PA14_18700	1609938..1609957	yes	TATGAGGACGAATCTCCCGCTTATA	TAGTTGGTGGGTTTCCCTACCGTGT	GGTCTCG	tata	GATGGCGCGGGCCGCTGGGG	gttt	tgagacc	GGTACAGTAAGTGAGAATCCTCTCT	GGTCTTGACAAACGTGTGCTTGTAC
PA14_18710	1611015..1611034	yes	TATGAGGACGAATCTCCCGCTTATA	TAGTTGGTGGGTTTCCCTACCGTGT	GGTCTCG	tata	GCGCAGGAGGGTGAGACGGT	gttt	tgagacc	GGTACAGTAAGTGAGAATCCTCTCT	GGTCTTGACAAACGTGTGCTTGTAC
PA14_18720	1611183..1611202	yes	TATGAGGACGAATCTCCCGCTTATA	TAGTTGGTGGGTTTCCCTACCGTGT	GGTCTCG	tata	AAAGGCAATAGAAGAAGGCG	gttt	tgagacc	GGTACAGTAAGTGAGAATCCTCTCT	GGTCTTGACAAACGTGTGCTTGTAC
PA14_18740	1612283..1612302	yes	TATGAGGACGAATCTCCCGCTTATA	TAGTTGGTGGGTTTCCCTACCGTGT	GGTCTCG	tata	CCAGGCCGCCGGAATACGCC	gttt	tgagacc	GGTACAGTAAGTGAGAATCCTCTCT	GGTCTTGACAAACGTGTGCTTGTAC
PA14_18750	1613919..1613938	yes	TATGAGGACGAATCTCCCGCTTATA	TAGTTGGTGGGTTTCCCTACCGTGT	GGTCTCG	tata	TTCCGACCCGGATCATGGTA	gttt	tgagacc	GGTACAGTAAGTGAGAATCCTCTCT	GGTCTTGACAAACGTGTGCTTGTAC
PA14_18760	1614352..1614371	yes	TATGAGGACGAATCTCCCGCTTATA	TAGTTGGTGGGTTTCCCTACCGTGT	GGTCTCG	tata	CACCTAGCGTCGCGGTGATG	gttt	tgagacc	GGTACAGTAAGTGAGAATCCTCTCT	GGTCTTGACAAACGTGTGCTTGTAC
PA14_18780	1615494..1615513	yes	TATGAGGACGAATCTCCCGCTTATA	TAGTTGGTGGGTTTCCCTACCGTGT	GGTCTCG	tata	GCCTATCGATGAAGAAGCGT	gttt	tgagacc	GGTACAGTAAGTGAGAATCCTCTCT	GGTCTTGACAAACGTGTGCTTGTAC
PA14_18790	1618650..1618669	yes	TATGAGGACGAATCTCCCGCTTATA	TAGTTGGTGGGTTTCCCTACCGTGT	GGTCTCG	tata	CTCAACGAAGACCGCAGGTA	gttt	tgagacc	GGTACAGTAAGTGAGAATCCTCTCT	GGTCTTGACAAACGTGTGCTTGTAC
PA14_18800	1620701..1620720	yes	TATGAGGACGAATCTCCCGCTTATA	TAGTTGGTGGGTTTCCCTACCGTGT	GGTCTCG	tata	CGCAGGTCATGTTCGGAATA	gttt	tgagacc	GGTACAGTAAGTGAGAATCCTCTCT	GGTCTTGACAAACGTGTGCTTGTAC
PA14_18810	1621297..1621316	yes	TATGAGGACGAATCTCCCGCTTATA	TAGTTGGTGGGTTTCCCTACCGTGT	GGTCTCG	tata	GAATTGCAGCATTGCTGTAA	gttt	tgagacc	GGTACAGTAAGTGAGAATCCTCTCT	GGTCTTGACAAACGTGTGCTTGTAC
PA14_18820	1622362..1622381	yes	TATGAGGACGAATCTCCCGCTTATA	TAGTTGGTGGGTTTCCCTACCGTGT	GGTCTCG	tata	CTGCGGCAGGGAAAAATTGC	gttt	tgagacc	GGTACAGTAAGTGAGAATCCTCTCT	GGTCTTGACAAACGTGTGCTTGTAC
PA14_18830	1623375..1623394	yes	TATGAGGACGAATCTCCCGCTTATA	TAGTTGGTGGGTTTCCCTACCGTGT	GGTCTCG	tata	CGGGATTCCGTAATGTGACT	gttt	tgagacc	GGTACAGTAAGTGAGAATCCTCTCT	GGTCTTGACAAACGTGTGCTTGTAC
PA14_18850	1624833..1624852	yes	TATGAGGACGAATCTCCCGCTTATA	TAGTTGGTGGGTTTCCCTACCGTGT	GGTCTCG	tata	ATGCGCGGTGCACGAGGAAC	gttt	tgagacc	GGTACAGTAAGTGAGAATCCTCTCT	GGTCTTGACAAACGTGTGCTTGTAC
PA14_18860	1626331..1626350	yes	TATGAGGACGAATCTCCCGCTTATA	TAGTTGGTGGGTTTCCCTACCGTGT	GGTCTCG	tata	TGAAAACTGCTTGACCTTCG	gttt	tgagacc	GGTACAGTAAGTGAGAATCCTCTCT	GGTCTTGACAAACGTGTGCTTGTAC
PA14_18870	1627723..1627742	yes	TATGAGGACGAATCTCCCGCTTATA	TAGTTGGTGGGTTTCCCTACCGTGT	GGTCTCG	tata	GTCGATCTCGAGTTCTTCTT	gttt	tgagacc	GGTACAGTAAGTGAGAATCCTCTCT	GGTCTTGACAAACGTGTGCTTGTAC
PA14_18880	1628473..1628492	yes	TATGAGGACGAATCTCCCGCTTATA	TAGTTGGTGGGTTTCCCTACCGTGT	GGTCTCG	tata	GAAGATCTCCGCGCGCTTGG	gttt	tgagacc	GGTACAGTAAGTGAGAATCCTCTCT	GGTCTTGACAAACGTGTGCTTGTAC
PA14_18890	1629165..1629184	yes	TATGAGGACGAATCTCCCGCTTATA	TAGTTGGTGGGTTTCCCTACCGTGT	GGTCTCG	tata	GTTGCGCCACAGGCCGTTGC	gttt	tgagacc	GGTACAGTAAGTGAGAATCCTCTCT	GGTCTTGACAAACGTGTGCTTGTAC
PA14_18900	1629823..1629842	yes	TATGAGGACGAATCTCCCGCTTATA	TAGTTGGTGGGTTTCCCTACCGTGT	GGTCTCG	tata	CAGCATCGAACGGCGAGTCG	gttt	tgagacc	GGTACAGTAAGTGAGAATCCTCTCT	GGTCTTGACAAACGTGTGCTTGTAC
PA14_18910	1630860..1630879	no	TATGAGGACGAATCTCCCGCTTATA	TAGTTGGTGGGTTTCCCTACCGTGT	GGTCTCG	tata	GGGCGAGGTGGGGCGGGGCA	gttt	tgagacc	GGTACAGTAAGTGAGAATCCTCTCT	GGTCTTGACAAACGTGTGCTTGTAC
PA14_18920	1633175..1633194	yes	TATGAGGACGAATCTCCCGCTTATA	TAGTTGGTGGGTTTCCCTACCGTGT	GGTCTCG	tata	CAGGCAGAGGCCACCGGGGA	gttt	tgagacc	GGTACAGTAAGTGAGAATCCTCTCT	GGTCTTGACAAACGTGTGCTTGTAC
PA14_18930	1633718..1633737	yes	TATGAGGACGAATCTCCCGCTTATA	TAGTTGGTGGGTTTCCCTACCGTGT	GGTCTCG	tata	GCACCGCCGGCCAGGCAGAT	gttt	tgagacc	GGTACAGTAAGTGAGAATCCTCTCT	GGTCTTGACAAACGTGTGCTTGTAC
PA14_18950	1634322..1634341	yes	TATGAGGACGAATCTCCCGCTTATA	TAGTTGGTGGGTTTCCCTACCGTGT	GGTCTCG	tata	GATGGCACTGACCAGGATCA	gttt	tgagacc	GGTACAGTAAGTGAGAATCCTCTCT	GGTCTTGACAAACGTGTGCTTGTAC
PA14_18960	1635204..1635223	yes	TATGAGGACGAATCTCCCGCTTATA	TAGTTGGTGGGTTTCCCTACCGTGT	GGTCTCG	tata	GATCTTGGCGAGAGGAATCT	gttt	tgagacc	GGTACAGTAAGTGAGAATCCTCTCT	GGTCTTGACAAACGTGTGCTTGTAC
PA14_18970	1638936..1638955	yes	TATGAGGACGAATCTCCCGCTTATA	TAGTTGGTGGGTTTCCCTACCGTGT	GGTCTCG	tata	TTTTCGTGGAGGCCGTTGTA	gttt	tgagacc	GGTACAGTAAGTGAGAATCCTCTCT	GGTCTTGACAAACGTGTGCTTGTAC
PA14_18985	1641279..1641298	yes	TATGAGGACGAATCTCCCGCTTATA	TAGTTGGTGGGTTTCCCTACCGTGT	GGTCTCG	tata	AGTTCGAGTTCGAAGCGGTA	gttt	tgagacc	GGTACAGTAAGTGAGAATCCTCTCT	GGTCTTGACAAACGTGTGCTTGTAC
PA14_19010	1642100..1642119	yes	TATGAGGACGAATCTCCCGCTTATA	TAGTTGGTGGGTTTCCCTACCGTGT	GGTCTCG	tata	GGCGAGGCTGGCGAGAAACA	gttt	tgagacc	GGTACAGTAAGTGAGAATCCTCTCT	GGTCTTGACAAACGTGTGCTTGTAC
PA14_19020	1643332..1643351	yes	TATGAGGACGAATCTCCCGCTTATA	TAGTTGGTGGGTTTCCCTACCGTGT	GGTCTCG	tata	CTCGATCAGGTCGCTGGTGG	gttt	tgagacc	GGTACAGTAAGTGAGAATCCTCTCT	GGTCTTGACAAACGTGTGCTTGTAC
PA14_19030	1644204..1644223	yes	TATGAGGACGAATCTCCCGCTTATA	TAGTTGGTGGGTTTCCCTACCGTGT	GGTCTCG	tata	CGCCGCCAGCAGGACGCCGG	gttt	tgagacc	GGTACAGTAAGTGAGAATCCTCTCT	GGTCTTGACAAACGTGTGCTTGTAC
PA14_19050	1646289..1646308	yes	TATGAGGACGAATCTCCCGCTTATA	TAGTTGGTGGGTTTCCCTACCGTGT	GGTCTCG	tata	AACGAGGATCTTGCGTGGTT	gttt	tgagacc	GGTACAGTAAGTGAGAATCCTCTCT	GGTCTTGACAAACGTGTGCTTGTAC
PA14_19065	1646453..1646472	yes	TATGAGGACGAATCTCCCGCTTATA	TAGTTGGTGGGTTTCCCTACCGTGT	GGTCTCG	tata	CACCGTTTGGCGAGTGATAG	gttt	tgagacc	GGTACAGTAAGTGAGAATCCTCTCT	GGTCTTGACAAACGTGTGCTTGTAC
PA14_19090	1647649..1647668	yes	TATGAGGACGAATCTCCCGCTTATA	TAGTTGGTGGGTTTCCCTACCGTGT	GGTCTCG	tata	AATCCACTTGTCCGATTTGA	gttt	tgagacc	GGTACAGTAAGTGAGAATCCTCTCT	GGTCTTGACAAACGTGTGCTTGTAC
PA14_19100	1648673..1648692	yes	TATGAGGACGAATCTCCCGCTTATA	TAGTTGGTGGGTTTCCCTACCGTGT	GGTCTCG	tata	CGCGCTCGACATGTACCCGC	gttt	tgagacc	GGTACAGTAAGTGAGAATCCTCTCT	GGTCTTGACAAACGTGTGCTTGTAC
PA14_19110	1649619..1649638	yes	TATGAGGACGAATCTCCCGCTTATA	TAGTTGGTGGGTTTCCCTACCGTGT	GGTCTCG	tata	GATGAAGGGAAATACGTCGC	gttt	tgagacc	GGTACAGTAAGTGAGAATCCTCTCT	GGTCTTGACAAACGTGTGCTTGTAC
PA14_19120	1651050..1651069	yes	TATGAGGACGAATCTCCCGCTTATA	TAGTTGGTGGGTTTCCCTACCGTGT	GGTCTCG	tata	ACGCCCTGGCTGTCGTGGAT	gttt	tgagacc	GGTACAGTAAGTGAGAATCCTCTCT	GGTCTTGACAAACGTGTGCTTGTAC
PA14_19130	1651936..1651955	yes	TATGAGGACGAATCTCCCGCTTATA	TAGTTGGTGGGTTTCCCTACCGTGT	GGTCTCG	tata	CAGCTCGGCGATCATGGCGG	gttt	tgagacc	GGTACAGTAAGTGAGAATCCTCTCT	GGTCTTGACAAACGTGTGCTTGTAC
PA14_19140	1652662..1652681	yes	TATGAGGACGAATCTCCCGCTTATA	TAGTTGGTGGGTTTCCCTACCGTGT	GGTCTCG	tata	ACGAGATGGCGGAATGACTT	gttt	tgagacc	GGTACAGTAAGTGAGAATCCTCTCT	GGTCTTGACAAACGTGTGCTTGTAC
PA14_19150	1653581..1653600	yes	TATGAGGACGAATCTCCCGCTTATA	TAGTTGGTGGGTTTCCCTACCGTGT	GGTCTCG	tata	GAAGGAGAACGCCCAGAGGA	gttt	tgagacc	GGTACAGTAAGTGAGAATCCTCTCT	GGTCTTGACAAACGTGTGCTTGTAC
PA14_19160	1654426..1654445	yes	TATGAGGACGAATCTCCCGCTTATA	TAGTTGGTGGGTTTCCCTACCGTGT	GGTCTCG	tata	CGACAGCAGCACGCCCTGCC	gttt	tgagacc	GGTACAGTAAGTGAGAATCCTCTCT	GGTCTTGACAAACGTGTGCTTGTAC
PA14_19170	1655898..1655917	yes	TATGAGGACGAATCTCCCGCTTATA	TAGTTGGTGGGTTTCCCTACCGTGT	GGTCTCG	tata	ACAGACAGGCATGTCAAAAA	gttt	tgagacc	GGTACAGTAAGTGAGAATCCTCTCT	GGTCTTGACAAACGTGTGCTTGTAC
PA14_19190	1656394..1656413	yes	TATGAGGACGAATCTCCCGCTTATA	TAGTTGGTGGGTTTCCCTACCGTGT	GGTCTCG	tata	CAAGGGACGCTTGGCTGTTT	gttt	tgagacc	GGTACAGTAAGTGAGAATCCTCTCT	GGTCTTGACAAACGTGTGCTTGTAC
PA14_19205	1658614..1658633	yes	TATGAGGACGAATCTCCCGCTTATA	TAGTTGGTGGGTTTCCCTACCGTGT	GGTCTCG	tata	GTCGTCGAACAGGCAGGCGG	gttt	tgagacc	GGTACAGTAAGTGAGAATCCTCTCT	GGTCTTGACAAACGTGTGCTTGTAC
PA14_19210	1659172..1659191	yes	TATGAGGACGAATCTCCCGCTTATA	TAGTTGGTGGGTTTCCCTACCGTGT	GGTCTCG	tata	GCGACGTAGTAGGTCAGGTG	gttt	tgagacc	GGTACAGTAAGTGAGAATCCTCTCT	GGTCTTGACAAACGTGTGCTTGTAC
PA14_19230	1660517..1660536	yes	TATGAGGACGAATCTCCCGCTTATA	TAGTTGGTGGGTTTCCCTACCGTGT	GGTCTCG	tata	GAGCTGGTCGAGAAGGGATG	gttt	tgagacc	GGTACAGTAAGTGAGAATCCTCTCT	GGTCTTGACAAACGTGTGCTTGTAC
PA14_19270	1662056..1662075	yes	TATGAGGACGAATCTCCCGCTTATA	TAGTTGGTGGGTTTCCCTACCGTGT	GGTCTCG	tata	GCGGCGGATGCGGGCGCGTC	gttt	tgagacc	GGTACAGTAAGTGAGAATCCTCTCT	GGTCTTGACAAACGTGTGCTTGTAC
PA14_19290	1662282..1662301	yes	TATGAGGACGAATCTCCCGCTTATA	TAGTTGGTGGGTTTCCCTACCGTGT	GGTCTCG	tata	AGGGGAAATTGGCTGAACAA	gttt	tgagacc	GGTACAGTAAGTGAGAATCCTCTCT	GGTCTTGACAAACGTGTGCTTGTAC
PA14_19310	1665417..1665436	yes	TATGAGGACGAATCTCCCGCTTATA	TAGTTGGTGGGTTTCCCTACCGTGT	GGTCTCG	tata	CGTGCTTGGGCGAAACGGAC	gttt	tgagacc	GGTACAGTAAGTGAGAATCCTCTCT	GGTCTTGACAAACGTGTGCTTGTAC
PA14_19320	1665684..1665703	yes	TATGAGGACGAATCTCCCGCTTATA	TAGTTGGTGGGTTTCCCTACCGTGT	GGTCTCG	tata	CGACCCACGCCCCCAGCAGC	gttt	tgagacc	GGTACAGTAAGTGAGAATCCTCTCT	GGTCTTGACAAACGTGTGCTTGTAC
PA14_19330	1667315..1667334	yes	TATGAGGACGAATCTCCCGCTTATA	TAGTTGGTGGGTTTCCCTACCGTGT	GGTCTCG	tata	CGGCTTCGAGCAGGTCGTGG	gttt	tgagacc	GGTACAGTAAGTGAGAATCCTCTCT	GGTCTTGACAAACGTGTGCTTGTAC
PA14_19340	1670126..1670145	yes	TATGAGGACGAATCTCCCGCTTATA	TAGTTGGTGGGTTTCCCTACCGTGT	GGTCTCG	tata	CAGCAGGACCAGGCAGAGTC	gttt	tgagacc	GGTACAGTAAGTGAGAATCCTCTCT	GGTCTTGACAAACGTGTGCTTGTAC
PA14_19350	1671459..1671478	yes	TATGAGGACGAATCTCCCGCTTATA	TAGTTGGTGGGTTTCCCTACCGTGT	GGTCTCG	tata	GAGGTCCGGTTGTGGCAGAG	gttt	tgagacc	GGTACAGTAAGTGAGAATCCTCTCT	GGTCTTGACAAACGTGTGCTTGTAC
PA14_19360	1673209..1673228	yes	TATGAGGACGAATCTCCCGCTTATA	TAGTTGGTGGGTTTCCCTACCGTGT	GGTCTCG	tata	GCGGGTGAGGCAGATGCAAG	gttt	tgagacc	GGTACAGTAAGTGAGAATCCTCTCT	GGTCTTGACAAACGTGTGCTTGTAC
PA14_19370	1674984..1675003	yes	TATGAGGACGAATCTCCCGCTTATA	TAGTTGGTGGGTTTCCCTACCGTGT	GGTCTCG	tata	GCGTTCGACCGCTGCGAGGT	gttt	tgagacc	GGTACAGTAAGTGAGAATCCTCTCT	GGTCTTGACAAACGTGTGCTTGTAC
PA14_19380	1675214..1675233	yes	TATGAGGACGAATCTCCCGCTTATA	TAGTTGGTGGGTTTCCCTACCGTGT	GGTCTCG	tata	GAGCGAATAGGTATCGGCAG	gttt	tgagacc	GGTACAGTAAGTGAGAATCCTCTCT	GGTCTTGACAAACGTGTGCTTGTAC
PA14_19390	1676629..1676648	yes	TATGAGGACGAATCTCCCGCTTATA	TAGTTGGTGGGTTTCCCTACCGTGT	GGTCTCG	tata	GAGAACGGCGCCGATGCCCA	gttt	tgagacc	GGTACAGTAAGTGAGAATCCTCTCT	GGTCTTGACAAACGTGTGCTTGTAC
PA14_19400	1678712..1678731	yes	TATGAGGACGAATCTCCCGCTTATA	TAGTTGGTGGGTTTCCCTACCGTGT	GGTCTCG	tata	GAGCTGGGCATGCTGGAAGT	gttt	tgagacc	GGTACAGTAAGTGAGAATCCTCTCT	GGTCTTGACAAACGTGTGCTTGTAC
PA14_19410	1678895..1678914	yes	TATGAGGACGAATCTCCCGCTTATA	TAGTTGGTGGGTTTCCCTACCGTGT	GGTCTCG	tata	GATGCTGTGGCCAACTTCCG	gttt	tgagacc	GGTACAGTAAGTGAGAATCCTCTCT	GGTCTTGACAAACGTGTGCTTGTAC
PA14_19430	1680557..1680576	yes	TATGAGGACGAATCTCCCGCTTATA	TAGTTGGTGGGTTTCCCTACCGTGT	GGTCTCG	tata	AGGACTTGGCCAGGCCGGTC	gttt	tgagacc	GGTACAGTAAGTGAGAATCCTCTCT	GGTCTTGACAAACGTGTGCTTGTAC
PA14_19450	1681845..1681864	yes	TATGAGGACGAATCTCCCGCTTATA	TAGTTGGTGGGTTTCCCTACCGTGT	GGTCTCG	tata	GAACGGCGAGTTGGGCTCGG	gttt	tgagacc	GGTACAGTAAGTGAGAATCCTCTCT	GGTCTTGACAAACGTGTGCTTGTAC
PA14_19470	1684227..1684246	yes	TATGAGGACGAATCTCCCGCTTATA	TAGTTGGTGGGTTTCCCTACCGTGT	GGTCTCG	tata	TTCCGATTCGACGCTGTTTT	gttt	tgagacc	GGTACAGTAAGTGAGAATCCTCTCT	GGTCTTGACAAACGTGTGCTTGTAC
PA14_19480	1684672..1684691	yes	TATGAGGACGAATCTCCCGCTTATA	TAGTTGGTGGGTTTCCCTACCGTGT	GGTCTCG	tata	GGTGGCCGGGACGGGATCGG	gttt	tgagacc	GGTACAGTAAGTGAGAATCCTCTCT	GGTCTTGACAAACGTGTGCTTGTAC
PA14_19490	1684924..1684943	yes	TATGAGGACGAATCTCCCGCTTATA	TAGTTGGTGGGTTTCCCTACCGTGT	GGTCTCG	tata	GGGCGATGTCGCCGAGTCTG	gttt	tgagacc	GGTACAGTAAGTGAGAATCCTCTCT	GGTCTTGACAAACGTGTGCTTGTAC
PA14_19500	1685815..1685834	yes	TATGAGGACGAATCTCCCGCTTATA	TAGTTGGTGGGTTTCCCTACCGTGT	GGTCTCG	tata	GGCCCGGCAGCGACGGAGAG	gttt	tgagacc	GGTACAGTAAGTGAGAATCCTCTCT	GGTCTTGACAAACGTGTGCTTGTAC
PA14_19510	1686824..1686843	yes	TATGAGGACGAATCTCCCGCTTATA	TAGTTGGTGGGTTTCCCTACCGTGT	GGTCTCG	tata	GCCGGGCCAGTCGCAGGCTC	gttt	tgagacc	GGTACAGTAAGTGAGAATCCTCTCT	GGTCTTGACAAACGTGTGCTTGTAC
PA14_19520	1687654..1687673	yes	TATGAGGACGAATCTCCCGCTTATA	TAGTTGGTGGGTTTCCCTACCGTGT	GGTCTCG	tata	AGGCCTTGCGAATCTCCAGC	gttt	tgagacc	GGTACAGTAAGTGAGAATCCTCTCT	GGTCTTGACAAACGTGTGCTTGTAC
PA14_19530	1688553..1688572	yes	TATGAGGACGAATCTCCCGCTTATA	TAGTTGGTGGGTTTCCCTACCGTGT	GGTCTCG	tata	TACGCTGGGACTTCCGGCGA	gttt	tgagacc	GGTACAGTAAGTGAGAATCCTCTCT	GGTCTTGACAAACGTGTGCTTGTAC
PA14_19540	1689259..1689278	yes	TATGAGGACGAATCTCCCGCTTATA	TAGTTGGTGGGTTTCCCTACCGTGT	GGTCTCG	tata	CAGTCCACGACGCAAAGCGA	gttt	tgagacc	GGTACAGTAAGTGAGAATCCTCTCT	GGTCTTGACAAACGTGTGCTTGTAC
PA14_19560	1690306..1690325	yes	TATGAGGACGAATCTCCCGCTTATA	TAGTTGGTGGGTTTCCCTACCGTGT	GGTCTCG	tata	GAAGGAACCAGAAAATCTCG	gttt	tgagacc	GGTACAGTAAGTGAGAATCCTCTCT	GGTCTTGACAAACGTGTGCTTGTAC
PA14_19570	1691480..1691499	yes	TATGAGGACGAATCTCCCGCTTATA	TAGTTGGTGGGTTTCCCTACCGTGT	GGTCTCG	tata	CAGGCGCTCGGCCAGTCGTT	gttt	tgagacc	GGTACAGTAAGTGAGAATCCTCTCT	GGTCTTGACAAACGTGTGCTTGTAC
PA14_19580	1692262..1692281	yes	TATGAGGACGAATCTCCCGCTTATA	TAGTTGGTGGGTTTCCCTACCGTGT	GGTCTCG	tata	GCCGCCAAGGGCGGCGTTGT	gttt	tgagacc	GGTACAGTAAGTGAGAATCCTCTCT	GGTCTTGACAAACGTGTGCTTGTAC
PA14_19590	1693124..1693143	yes	TATGAGGACGAATCTCCCGCTTATA	TAGTTGGTGGGTTTCCCTACCGTGT	GGTCTCG	tata	ACGAACGTTGATGGCTTTGA	gttt	tgagacc	GGTACAGTAAGTGAGAATCCTCTCT	GGTCTTGACAAACGTGTGCTTGTAC
PA14_19600	1693824..1693843	yes	TATGAGGACGAATCTCCCGCTTATA	TAGTTGGTGGGTTTCCCTACCGTGT	GGTCTCG	tata	ACGCGCGCGGAAGTCGGTCA	gttt	tgagacc	GGTACAGTAAGTGAGAATCCTCTCT	GGTCTTGACAAACGTGTGCTTGTAC
PA14_19610	1694187..1694206	yes	TATGAGGACGAATCTCCCGCTTATA	TAGTTGGTGGGTTTCCCTACCGTGT	GGTCTCG	tata	CTGTTCGGTGAGGTTGGCTG	gttt	tgagacc	GGTACAGTAAGTGAGAATCCTCTCT	GGTCTTGACAAACGTGTGCTTGTAC
PA14_19620	1694688..1694707	yes	TATGAGGACGAATCTCCCGCTTATA	TAGTTGGTGGGTTTCCCTACCGTGT	GGTCTCG	tata	GCCATTCCCGGTTCCAGTCG	gttt	tgagacc	GGTACAGTAAGTGAGAATCCTCTCT	GGTCTTGACAAACGTGTGCTTGTAC
PA14_19630	1695248..1695267	yes	TATGAGGACGAATCTCCCGCTTATA	TAGTTGGTGGGTTTCCCTACCGTGT	GGTCTCG	tata	GGTAATGCTGGGAAAGTGCT	gttt	tgagacc	GGTACAGTAAGTGAGAATCCTCTCT	GGTCTTGACAAACGTGTGCTTGTAC
PA14_19640	1695965..1695984	yes	TATGAGGACGAATCTCCCGCTTATA	TAGTTGGTGGGTTTCCCTACCGTGT	GGTCTCG	tata	GGCGCCGGTGATCAGGATCG	gttt	tgagacc	GGTACAGTAAGTGAGAATCCTCTCT	GGTCTTGACAAACGTGTGCTTGTAC
PA14_19650	1696636..1696655	yes	TATGAGGACGAATCTCCCGCTTATA	TAGTTGGTGGGTTTCCCTACCGTGT	GGTCTCG	tata	CACCAGCAGGGTAACGGGAG	gttt	tgagacc	GGTACAGTAAGTGAGAATCCTCTCT	GGTCTTGACAAACGTGTGCTTGTAC
PA14_19660	1696958..1696977	yes	TATGAGGACGAATCTCCCGCTTATA	TAGTTGGTGGGTTTCCCTACCGTGT	GGTCTCG	tata	GTAGACCGAGCCGGAGAGAA	gttt	tgagacc	GGTACAGTAAGTGAGAATCCTCTCT	GGTCTTGACAAACGTGTGCTTGTAC
PA14_19670	1698399..1698418	yes	TATGAGGACGAATCTCCCGCTTATA	TAGTTGGTGGGTTTCCCTACCGTGT	GGTCTCG	tata	CGACGAAGCTGCGGAGTTGA	gttt	tgagacc	GGTACAGTAAGTGAGAATCCTCTCT	GGTCTTGACAAACGTGTGCTTGTAC
PA14_19680	1698534..1698553	yes	TATGAGGACGAATCTCCCGCTTATA	TAGTTGGTGGGTTTCCCTACCGTGT	GGTCTCG	tata	GACAGACGGCGGACGAGCGG	gttt	tgagacc	GGTACAGTAAGTGAGAATCCTCTCT	GGTCTTGACAAACGTGTGCTTGTAC
PA14_19690	1698923..1698942	yes	TATGAGGACGAATCTCCCGCTTATA	TAGTTGGTGGGTTTCCCTACCGTGT	GGTCTCG	tata	GGTCGCCGCCAACCAGAACA	gttt	tgagacc	GGTACAGTAAGTGAGAATCCTCTCT	GGTCTTGACAAACGTGTGCTTGTAC
PA14_19700	1699723..1699742	yes	TATGAGGACGAATCTCCCGCTTATA	TAGTTGGTGGGTTTCCCTACCGTGT	GGTCTCG	tata	GGCGGGCAGGGAGTGAACGG	gttt	tgagacc	GGTACAGTAAGTGAGAATCCTCTCT	GGTCTTGACAAACGTGTGCTTGTAC
PA14_19710	1700499..1700518	yes	TATGAGGACGAATCTCCCGCTTATA	TAGTTGGTGGGTTTCCCTACCGTGT	GGTCTCG	tata	GGGAATGCCGGGCAGCGCCG	gttt	tgagacc	GGTACAGTAAGTGAGAATCCTCTCT	GGTCTTGACAAACGTGTGCTTGTAC
PA14_19720	1701499..1701518	yes	TATGAGGACGAATCTCCCGCTTATA	TAGTTGGTGGGTTTCCCTACCGTGT	GGTCTCG	tata	AACACGCGCAAGGGAGAAAC	gttt	tgagacc	GGTACAGTAAGTGAGAATCCTCTCT	GGTCTTGACAAACGTGTGCTTGTAC
PA14_19730	1701909..1701928	yes	TATGAGGACGAATCTCCCGCTTATA	TAGTTGGTGGGTTTCCCTACCGTGT	GGTCTCG	tata	GACTTGGTCGTCGAAACGCA	gttt	tgagacc	GGTACAGTAAGTGAGAATCCTCTCT	GGTCTTGACAAACGTGTGCTTGTAC
PA14_19740	1702954..1702973	yes	TATGAGGACGAATCTCCCGCTTATA	TAGTTGGTGGGTTTCCCTACCGTGT	GGTCTCG	tata	GCGATGACCAGGGTGGTGAC	gttt	tgagacc	GGTACAGTAAGTGAGAATCCTCTCT	GGTCTTGACAAACGTGTGCTTGTAC
PA14_19750	1704032..1704051	yes	TATGAGGACGAATCTCCCGCTTATA	TAGTTGGTGGGTTTCCCTACCGTGT	GGTCTCG	tata	GGTATTTTTCAGAAGGGTCA	gttt	tgagacc	GGTACAGTAAGTGAGAATCCTCTCT	GGTCTTGACAAACGTGTGCTTGTAC
PA14_19770	1705470..1705489	yes	TATGAGGACGAATCTCCCGCTTATA	TAGTTGGTGGGTTTCCCTACCGTGT	GGTCTCG	tata	CCACAGGCTGAGGTGGCGCC	gttt	tgagacc	GGTACAGTAAGTGAGAATCCTCTCT	GGTCTTGACAAACGTGTGCTTGTAC
PA14_19800	1706303..1706322	yes	TATGAGGACGAATCTCCCGCTTATA	TAGTTGGTGGGTTTCCCTACCGTGT	GGTCTCG	tata	CGCGGTGCTTCCAACTGAGG	gttt	tgagacc	GGTACAGTAAGTGAGAATCCTCTCT	GGTCTTGACAAACGTGTGCTTGTAC
PA14_19810	1706650..1706669	yes	TATGAGGACGAATCTCCCGCTTATA	TAGTTGGTGGGTTTCCCTACCGTGT	GGTCTCG	tata	CCGCAGCGAGTGCGTGCAGA	gttt	tgagacc	GGTACAGTAAGTGAGAATCCTCTCT	GGTCTTGACAAACGTGTGCTTGTAC
PA14_19830	1708452..1708471	yes	TATGAGGACGAATCTCCCGCTTATA	TAGTTGGTGGGTTTCCCTACCGTGT	GGTCTCG	tata	GGGCCAGCGCCCCGGAGGAC	gttt	tgagacc	GGTACAGTAAGTGAGAATCCTCTCT	GGTCTTGACAAACGTGTGCTTGTAC
PA14_19850	1709959..1709978	yes	TATGAGGACGAATCTCCCGCTTATA	TAGTTGGTGGGTTTCCCTACCGTGT	GGTCTCG	tata	GGCGGGCAGCTCGGTCGGCT	gttt	tgagacc	GGTACAGTAAGTGAGAATCCTCTCT	GGTCTTGACAAACGTGTGCTTGTAC
PA14_19860	1713227..1713246	yes	TATGAGGACGAATCTCCCGCTTATA	TAGTTGGTGGGTTTCCCTACCGTGT	GGTCTCG	tata	AATCGAGGCAGGCTTGACGC	gttt	tgagacc	GGTACAGTAAGTGAGAATCCTCTCT	GGTCTTGACAAACGTGTGCTTGTAC
PA14_19870	1713541..1713560	yes	TATGAGGACGAATCTCCCGCTTATA	TAGTTGGTGGGTTTCCCTACCGTGT	GGTCTCG	tata	TGGCCGGGTCTTGGGCGAGG	gttt	tgagacc	GGTACAGTAAGTGAGAATCCTCTCT	GGTCTTGACAAACGTGTGCTTGTAC
PA14_19900	1714690..1714709	yes	TATGAGGACGAATCTCCCGCTTATA	TAGTTGGTGGGTTTCCCTACCGTGT	GGTCTCG	tata	CGAGGTAGCGGGTGAAAGGC	gttt	tgagacc	GGTACAGTAAGTGAGAATCCTCTCT	GGTCTTGACAAACGTGTGCTTGTAC
PA14_19910	1715789..1715808	yes	TATGAGGACGAATCTCCCGCTTATA	TAGTTGGTGGGTTTCCCTACCGTGT	GGTCTCG	tata	TGACCGCCTCCAGAAGGGCC	gttt	tgagacc	GGTACAGTAAGTGAGAATCCTCTCT	GGTCTTGACAAACGTGTGCTTGTAC
PA14_19920	1716797..1716816	yes	TATGAGGACGAATCTCCCGCTTATA	TAGTTGGTGGGTTTCCCTACCGTGT	GGTCTCG	tata	TGCAGGCCCTCGCCCAGGTC	gttt	tgagacc	GGTACAGTAAGTGAGAATCCTCTCT	GGTCTTGACAAACGTGTGCTTGTAC
PA14_19930	1718322..1718341	no	TATGAGGACGAATCTCCCGCTTATA	TAGTTGGTGGGTTTCCCTACCGTGT	GGTCTCG	tata	GTACGGCAAGCGCCAGTTTC	gttt	tgagacc	GGTACAGTAAGTGAGAATCCTCTCT	GGTCTTGACAAACGTGTGCTTGTAC
PA14_19940	1718940..1718959	yes	TATGAGGACGAATCTCCCGCTTATA	TAGTTGGTGGGTTTCCCTACCGTGT	GGTCTCG	tata	AGCAGGCCGGCAAGTTGTCG	gttt	tgagacc	GGTACAGTAAGTGAGAATCCTCTCT	GGTCTTGACAAACGTGTGCTTGTAC
PA14_19950	1719241..1719260	yes	TATGAGGACGAATCTCCCGCTTATA	TAGTTGGTGGGTTTCCCTACCGTGT	GGTCTCG	tata	GCTGCGGTACACCACTTCGA	gttt	tgagacc	GGTACAGTAAGTGAGAATCCTCTCT	GGTCTTGACAAACGTGTGCTTGTAC
PA14_19960	1719491..1719510	yes	TATGAGGACGAATCTCCCGCTTATA	TAGTTGGTGGGTTTCCCTACCGTGT	GGTCTCG	tata	GCAGCGCGACAAGTGCCAAC	gttt	tgagacc	GGTACAGTAAGTGAGAATCCTCTCT	GGTCTTGACAAACGTGTGCTTGTAC
PA14_19970	1719877..1719896	yes	TATGAGGACGAATCTCCCGCTTATA	TAGTTGGTGGGTTTCCCTACCGTGT	GGTCTCG	tata	TGAGCAGGAGGGCGAAACCG	gttt	tgagacc	GGTACAGTAAGTGAGAATCCTCTCT	GGTCTTGACAAACGTGTGCTTGTAC
PA14_19990	1720173..1720192	yes	TATGAGGACGAATCTCCCGCTTATA	TAGTTGGTGGGTTTCCCTACCGTGT	GGTCTCG	tata	TTGAGATCCTGCTCCGCCAA	gttt	tgagacc	GGTACAGTAAGTGAGAATCCTCTCT	GGTCTTGACAAACGTGTGCTTGTAC
PA14_20000	1720752..1720771	yes	TATGAGGACGAATCTCCCGCTTATA	TAGTTGGTGGGTTTCCCTACCGTGT	GGTCTCG	tata	GGATCTGCTGTTGTTCCTGG	gttt	tgagacc	GGTACAGTAAGTGAGAATCCTCTCT	GGTCTTGACAAACGTGTGCTTGTAC
PA14_20010	1721962..1721981	yes	TATGAGGACGAATCTCCCGCTTATA	TAGTTGGTGGGTTTCCCTACCGTGT	GGTCTCG	tata	CCCCTTGCGACCGCCTCGCA	gttt	tgagacc	GGTACAGTAAGTGAGAATCCTCTCT	GGTCTTGACAAACGTGTGCTTGTAC
PA14_20020	1724717..1724736	yes	TATGAGGACGAATCTCCCGCTTATA	TAGTTGGTGGGTTTCCCTACCGTGT	GGTCTCG	tata	GCCGCTGTAGGTGGTGCTGT	gttt	tgagacc	GGTACAGTAAGTGAGAATCCTCTCT	GGTCTTGACAAACGTGTGCTTGTAC
PA14_20030	1725544..1725563	yes	TATGAGGACGAATCTCCCGCTTATA	TAGTTGGTGGGTTTCCCTACCGTGT	GGTCTCG	tata	CATTGCGCGGCGAGGCCGGC	gttt	tgagacc	GGTACAGTAAGTGAGAATCCTCTCT	GGTCTTGACAAACGTGTGCTTGTAC
PA14_20040	1727357..1727376	yes	TATGAGGACGAATCTCCCGCTTATA	TAGTTGGTGGGTTTCCCTACCGTGT	GGTCTCG	tata	CAGTTCCAGCGCCGCGCCGC	gttt	tgagacc	GGTACAGTAAGTGAGAATCCTCTCT	GGTCTTGACAAACGTGTGCTTGTAC
PA14_20050	1728659..1728678	yes	TATGAGGACGAATCTCCCGCTTATA	TAGTTGGTGGGTTTCCCTACCGTGT	GGTCTCG	tata	AGGACAGCAGGCAGGCTCGC	gttt	tgagacc	GGTACAGTAAGTGAGAATCCTCTCT	GGTCTTGACAAACGTGTGCTTGTAC
PA14_20060	1730257..1730276	yes	TATGAGGACGAATCTCCCGCTTATA	TAGTTGGTGGGTTTCCCTACCGTGT	GGTCTCG	tata	GAGCTGGAAAGGGCTGCTGT	gttt	tgagacc	GGTACAGTAAGTGAGAATCCTCTCT	GGTCTTGACAAACGTGTGCTTGTAC
PA14_20070	1730477..1730496	yes	TATGAGGACGAATCTCCCGCTTATA	TAGTTGGTGGGTTTCCCTACCGTGT	GGTCTCG	tata	CATGCTTGCGCGCAGGCGCT	gttt	tgagacc	GGTACAGTAAGTGAGAATCCTCTCT	GGTCTTGACAAACGTGTGCTTGTAC
PA14_20080	1731081..1731100	yes	TATGAGGACGAATCTCCCGCTTATA	TAGTTGGTGGGTTTCCCTACCGTGT	GGTCTCG	tata	GATCGCGAGGATCAGCAACG	gttt	tgagacc	GGTACAGTAAGTGAGAATCCTCTCT	GGTCTTGACAAACGTGTGCTTGTAC
PA14_20100	1732044..1732063	yes	TATGAGGACGAATCTCCCGCTTATA	TAGTTGGTGGGTTTCCCTACCGTGT	GGTCTCG	tata	GCTGGCGTTGCGCTTCAGCG	gttt	tgagacc	GGTACAGTAAGTGAGAATCCTCTCT	GGTCTTGACAAACGTGTGCTTGTAC
PA14_20110	1733214..1733233	yes	TATGAGGACGAATCTCCCGCTTATA	TAGTTGGTGGGTTTCCCTACCGTGT	GGTCTCG	tata	GGGTTTCCCGGAGGATCTGC	gttt	tgagacc	GGTACAGTAAGTGAGAATCCTCTCT	GGTCTTGACAAACGTGTGCTTGTAC
PA14_20120	1734433..1734452	yes	TATGAGGACGAATCTCCCGCTTATA	TAGTTGGTGGGTTTCCCTACCGTGT	GGTCTCG	tata	GGAACCGCACCCGCCGAGCG	gttt	tgagacc	GGTACAGTAAGTGAGAATCCTCTCT	GGTCTTGACAAACGTGTGCTTGTAC
PA14_20130	1735624..1735643	yes	TATGAGGACGAATCTCCCGCTTATA	TAGTTGGTGGGTTTCCCTACCGTGT	GGTCTCG	tata	GAACACCTCGAGCTGGCGGA	gttt	tgagacc	GGTACAGTAAGTGAGAATCCTCTCT	GGTCTTGACAAACGTGTGCTTGTAC
PA14_20140	1735949..1735968	yes	TATGAGGACGAATCTCCCGCTTATA	TAGTTGGTGGGTTTCCCTACCGTGT	GGTCTCG	tata	GTGCACGCTGAGAACGCGCT	gttt	tgagacc	GGTACAGTAAGTGAGAATCCTCTCT	GGTCTTGACAAACGTGTGCTTGTAC
PA14_20150	1737290..1737309	yes	TATGAGGACGAATCTCCCGCTTATA	TAGTTGGTGGGTTTCCCTACCGTGT	GGTCTCG	tata	GAGCAGAGGGCGCAGGGGGA	gttt	tgagacc	GGTACAGTAAGTGAGAATCCTCTCT	GGTCTTGACAAACGTGTGCTTGTAC
PA14_20170,PA14_20180	1738144..1738163	yes	TATGAGGACGAATCTCCCGCTTATA	TAGTTGGTGGGTTTCCCTACCGTGT	GGTCTCG	tata	CGGGCGATGGTCCAGACTAC	gttt	tgagacc	GGTACAGTAAGTGAGAATCCTCTCT	GGTCTTGACAAACGTGTGCTTGTAC
PA14_20180	1739024..1739043	yes	TATGAGGACGAATCTCCCGCTTATA	TAGTTGGTGGGTTTCCCTACCGTGT	GGTCTCG	tata	GGTGAGGGCGCCGTAGCGCA	gttt	tgagacc	GGTACAGTAAGTGAGAATCCTCTCT	GGTCTTGACAAACGTGTGCTTGTAC
PA14_20190	1740330..1740349	yes	TATGAGGACGAATCTCCCGCTTATA	TAGTTGGTGGGTTTCCCTACCGTGT	GGTCTCG	tata	CGGCCATCGACCGCGCTGAG	gttt	tgagacc	GGTACAGTAAGTGAGAATCCTCTCT	GGTCTTGACAAACGTGTGCTTGTAC
PA14_20200	1742222..1742241	yes	TATGAGGACGAATCTCCCGCTTATA	TAGTTGGTGGGTTTCCCTACCGTGT	GGTCTCG	tata	GGCCATGGGTTTCTTCGTGG	gttt	tgagacc	GGTACAGTAAGTGAGAATCCTCTCT	GGTCTTGACAAACGTGTGCTTGTAC
PA14_20230	1744426..1744445	yes	TATGAGGACGAATCTCCCGCTTATA	TAGTTGGTGGGTTTCCCTACCGTGT	GGTCTCG	tata	CGATCCGGCGGAAAAACGAA	gttt	tgagacc	GGTACAGTAAGTGAGAATCCTCTCT	GGTCTTGACAAACGTGTGCTTGTAC
PA14_20240	1745071..1745090	no	TATGAGGACGAATCTCCCGCTTATA	TAGTTGGTGGGTTTCCCTACCGTGT	GGTCTCG	tata	GGAGGGGCGGGCAGGGCGGT	gttt	tgagacc	GGTACAGTAAGTGAGAATCCTCTCT	GGTCTTGACAAACGTGTGCTTGTAC
PA14_20250	1745183..1745202	yes	TATGAGGACGAATCTCCCGCTTATA	TAGTTGGTGGGTTTCCCTACCGTGT	GGTCTCG	tata	GGCGCAGCCGGCCCTGAGGC	gttt	tgagacc	GGTACAGTAAGTGAGAATCCTCTCT	GGTCTTGACAAACGTGTGCTTGTAC
PA14_20260	1746136..1746155	yes	TATGAGGACGAATCTCCCGCTTATA	TAGTTGGTGGGTTTCCCTACCGTGT	GGTCTCG	tata	GCCGATGGGAGAAACGCTGT	gttt	tgagacc	GGTACAGTAAGTGAGAATCCTCTCT	GGTCTTGACAAACGTGTGCTTGTAC
PA14_20270	1746957..1746976	yes	TATGAGGACGAATCTCCCGCTTATA	TAGTTGGTGGGTTTCCCTACCGTGT	GGTCTCG	tata	CGGCCGGCGAGGCTGAAATA	gttt	tgagacc	GGTACAGTAAGTGAGAATCCTCTCT	GGTCTTGACAAACGTGTGCTTGTAC
PA14_20280	1747410..1747429	yes	TATGAGGACGAATCTCCCGCTTATA	TAGTTGGTGGGTTTCCCTACCGTGT	GGTCTCG	tata	CAGCCAGACCAGGGCATCGG	gttt	tgagacc	GGTACAGTAAGTGAGAATCCTCTCT	GGTCTTGACAAACGTGTGCTTGTAC
PA14_20290	1747901..1747920	yes	TATGAGGACGAATCTCCCGCTTATA	TAGTTGGTGGGTTTCCCTACCGTGT	GGTCTCG	tata	TAGGAGTTGCCTGTTTCAGT	gttt	tgagacc	GGTACAGTAAGTGAGAATCCTCTCT	GGTCTTGACAAACGTGTGCTTGTAC
PA14_20300	1748306..1748325	yes	TATGAGGACGAATCTCCCGCTTATA	TAGTTGGTGGGTTTCCCTACCGTGT	GGTCTCG	tata	TCTTGTTCAGGCTGTCGACA	gttt	tgagacc	GGTACAGTAAGTGAGAATCCTCTCT	GGTCTTGACAAACGTGTGCTTGTAC
PA14_20320	1749218..1749237	yes	TATGAGGACGAATCTCCCGCTTATA	TAGTTGGTGGGTTTCCCTACCGTGT	GGTCTCG	tata	GGCAAGGGAGCCGGCGAGCA	gttt	tgagacc	GGTACAGTAAGTGAGAATCCTCTCT	GGTCTTGACAAACGTGTGCTTGTAC
PA14_20330	1750269..1750288	yes	TATGAGGACGAATCTCCCGCTTATA	TAGTTGGTGGGTTTCCCTACCGTGT	GGTCTCG	tata	GGTGGCGGCCGCCGCGGCGG	gttt	tgagacc	GGTACAGTAAGTGAGAATCCTCTCT	GGTCTTGACAAACGTGTGCTTGTAC
PA14_20350	1751073..1751092	yes	TATGAGGACGAATCTCCCGCTTATA	TAGTTGGTGGGTTTCCCTACCGTGT	GGTCTCG	tata	ACAAGTGCATGGTTTGGAAA	gttt	tgagacc	GGTACAGTAAGTGAGAATCCTCTCT	GGTCTTGACAAACGTGTGCTTGTAC
PA14_20360	1751804..1751823	yes	TATGAGGACGAATCTCCCGCTTATA	TAGTTGGTGGGTTTCCCTACCGTGT	GGTCTCG	tata	GGTGGGATCGGAATGCAAGG	gttt	tgagacc	GGTACAGTAAGTGAGAATCCTCTCT	GGTCTTGACAAACGTGTGCTTGTAC
PA14_20370	1752276..1752295	yes	TATGAGGACGAATCTCCCGCTTATA	TAGTTGGTGGGTTTCCCTACCGTGT	GGTCTCG	tata	GCGGCGGTATCCGCCGGGCT	gttt	tgagacc	GGTACAGTAAGTGAGAATCCTCTCT	GGTCTTGACAAACGTGTGCTTGTAC
PA14_20380	1752897..1752916	yes	TATGAGGACGAATCTCCCGCTTATA	TAGTTGGTGGGTTTCCCTACCGTGT	GGTCTCG	tata	GGCCTTCTCGCCACCCTTGA	gttt	tgagacc	GGTACAGTAAGTGAGAATCCTCTCT	GGTCTTGACAAACGTGTGCTTGTAC
PA14_20390	1753989..1754008	yes	TATGAGGACGAATCTCCCGCTTATA	TAGTTGGTGGGTTTCCCTACCGTGT	GGTCTCG	tata	CGGCGCTGGCTTGCGGGGAA	gttt	tgagacc	GGTACAGTAAGTGAGAATCCTCTCT	GGTCTTGACAAACGTGTGCTTGTAC
PA14_20400	1754884..1754903	yes	TATGAGGACGAATCTCCCGCTTATA	TAGTTGGTGGGTTTCCCTACCGTGT	GGTCTCG	tata	CGCGTCGAGGCTCGCATCGA	gttt	tgagacc	GGTACAGTAAGTGAGAATCCTCTCT	GGTCTTGACAAACGTGTGCTTGTAC
PA14_20420	1755739..1755758	yes	TATGAGGACGAATCTCCCGCTTATA	TAGTTGGTGGGTTTCCCTACCGTGT	GGTCTCG	tata	TGAGGTCGCGGACCTCGATC	gttt	tgagacc	GGTACAGTAAGTGAGAATCCTCTCT	GGTCTTGACAAACGTGTGCTTGTAC
PA14_20430	1756465..1756484	yes	TATGAGGACGAATCTCCCGCTTATA	TAGTTGGTGGGTTTCCCTACCGTGT	GGTCTCG	tata	CCGCTCGGCGCTGACTACCC	gttt	tgagacc	GGTACAGTAAGTGAGAATCCTCTCT	GGTCTTGACAAACGTGTGCTTGTAC
PA14_20440	1757630..1757649	yes	TATGAGGACGAATCTCCCGCTTATA	TAGTTGGTGGGTTTCCCTACCGTGT	GGTCTCG	tata	CTGTCCTTGCCCGAGCCGGA	gttt	tgagacc	GGTACAGTAAGTGAGAATCCTCTCT	GGTCTTGACAAACGTGTGCTTGTAC
PA14_20450	1758158..1758177	yes	TATGAGGACGAATCTCCCGCTTATA	TAGTTGGTGGGTTTCCCTACCGTGT	GGTCTCG	tata	GGCATCGCCGGTGCCGAGCA	gttt	tgagacc	GGTACAGTAAGTGAGAATCCTCTCT	GGTCTTGACAAACGTGTGCTTGTAC
PA14_20460	1759107..1759126	yes	TATGAGGACGAATCTCCCGCTTATA	TAGTTGGTGGGTTTCCCTACCGTGT	GGTCTCG	tata	CACGAACAGAAGAATGACGG	gttt	tgagacc	GGTACAGTAAGTGAGAATCCTCTCT	GGTCTTGACAAACGTGTGCTTGTAC
PA14_20470	1759307..1759326	yes	TATGAGGACGAATCTCCCGCTTATA	TAGTTGGTGGGTTTCCCTACCGTGT	GGTCTCG	tata	GGGCGGTCAGCGGCAAAGCC	gttt	tgagacc	GGTACAGTAAGTGAGAATCCTCTCT	GGTCTTGACAAACGTGTGCTTGTAC
PA14_20480	1759665..1759684	yes	TATGAGGACGAATCTCCCGCTTATA	TAGTTGGTGGGTTTCCCTACCGTGT	GGTCTCG	tata	AAAGAAGTCCGGTGCCGACC	gttt	tgagacc	GGTACAGTAAGTGAGAATCCTCTCT	GGTCTTGACAAACGTGTGCTTGTAC
PA14_20491	1760388..1760407	yes	TATGAGGACGAATCTCCCGCTTATA	TAGTTGGTGGGTTTCCCTACCGTGT	GGTCTCG	tata	CGGCGGGAATGGCGACGGTC	gttt	tgagacc	GGTACAGTAAGTGAGAATCCTCTCT	GGTCTTGACAAACGTGTGCTTGTAC
PA14_20500	1760540..1760559	yes	TATGAGGACGAATCTCCCGCTTATA	TAGTTGGTGGGTTTCCCTACCGTGT	GGTCTCG	tata	CTCTATCCAATTGAGCTACC	gttt	tgagacc	GGTACAGTAAGTGAGAATCCTCTCT	GGTCTTGACAAACGTGTGCTTGTAC
PA14_20510	1762542..1762561	yes	TATGAGGACGAATCTCCCGCTTATA	TAGTTGGTGGGTTTCCCTACCGTGT	GGTCTCG	tata	TAGGTAGCTATCATCCTTGC	gttt	tgagacc	GGTACAGTAAGTGAGAATCCTCTCT	GGTCTTGACAAACGTGTGCTTGTAC
PA14_20520	1763895..1763914	yes	TATGAGGACGAATCTCCCGCTTATA	TAGTTGGTGGGTTTCCCTACCGTGT	GGTCTCG	tata	TCAGCCAACTGCCGTCGCCG	gttt	tgagacc	GGTACAGTAAGTGAGAATCCTCTCT	GGTCTTGACAAACGTGTGCTTGTAC
PA14_20520,PA14_20530	1766202..1766221	yes	TATGAGGACGAATCTCCCGCTTATA	TAGTTGGTGGGTTTCCCTACCGTGT	GGTCTCG	tata	CATATGGCGATCCTTATAGC	gttt	tgagacc	GGTACAGTAAGTGAGAATCCTCTCT	GGTCTTGACAAACGTGTGCTTGTAC
PA14_20550	1768300..1768319	yes	TATGAGGACGAATCTCCCGCTTATA	TAGTTGGTGGGTTTCCCTACCGTGT	GGTCTCG	tata	CAGGAGGAAGAGGGCGATCG	gttt	tgagacc	GGTACAGTAAGTGAGAATCCTCTCT	GGTCTTGACAAACGTGTGCTTGTAC
PA14_20560	1768630..1768649	yes	TATGAGGACGAATCTCCCGCTTATA	TAGTTGGTGGGTTTCCCTACCGTGT	GGTCTCG	tata	TCCGACGGTGTCGTTGCTGC	gttt	tgagacc	GGTACAGTAAGTGAGAATCCTCTCT	GGTCTTGACAAACGTGTGCTTGTAC
PA14_20570	1769738..1769757	yes	TATGAGGACGAATCTCCCGCTTATA	TAGTTGGTGGGTTTCCCTACCGTGT	GGTCTCG	tata	TCGAGCATGTCGCTCAGAAA	gttt	tgagacc	GGTACAGTAAGTGAGAATCCTCTCT	GGTCTTGACAAACGTGTGCTTGTAC
PA14_20580	1770897..1770916	yes	TATGAGGACGAATCTCCCGCTTATA	TAGTTGGTGGGTTTCCCTACCGTGT	GGTCTCG	tata	GAGAACAGCAGGCCGATCAG	gttt	tgagacc	GGTACAGTAAGTGAGAATCCTCTCT	GGTCTTGACAAACGTGTGCTTGTAC
PA14_20590	1772037..1772056	yes	TATGAGGACGAATCTCCCGCTTATA	TAGTTGGTGGGTTTCCCTACCGTGT	GGTCTCG	tata	CAGGCTGCCAAGCAGCGAGT	gttt	tgagacc	GGTACAGTAAGTGAGAATCCTCTCT	GGTCTTGACAAACGTGTGCTTGTAC
PA14_20600	1773161..1773180	yes	TATGAGGACGAATCTCCCGCTTATA	TAGTTGGTGGGTTTCCCTACCGTGT	GGTCTCG	tata	CGCCAGCAGCGCGCAGGAAA	gttt	tgagacc	GGTACAGTAAGTGAGAATCCTCTCT	GGTCTTGACAAACGTGTGCTTGTAC
PA14_20610	1774163..1774182	yes	TATGAGGACGAATCTCCCGCTTATA	TAGTTGGTGGGTTTCCCTACCGTGT	GGTCTCG	tata	GAACTGGGTGTTGGCGGGAA	gttt	tgagacc	GGTACAGTAAGTGAGAATCCTCTCT	GGTCTTGACAAACGTGTGCTTGTAC
PA14_20620	1774683..1774702	yes	TATGAGGACGAATCTCCCGCTTATA	TAGTTGGTGGGTTTCCCTACCGTGT	GGTCTCG	tata	CAACGGGCAAATCGTTGATC	gttt	tgagacc	GGTACAGTAAGTGAGAATCCTCTCT	GGTCTTGACAAACGTGTGCTTGTAC
PA14_20630	1775762..1775781	yes	TATGAGGACGAATCTCCCGCTTATA	TAGTTGGTGGGTTTCCCTACCGTGT	GGTCTCG	tata	GCACTGACGCAGGTCGTTGG	gttt	tgagacc	GGTACAGTAAGTGAGAATCCTCTCT	GGTCTTGACAAACGTGTGCTTGTAC
PA14_20640	1777617..1777636	yes	TATGAGGACGAATCTCCCGCTTATA	TAGTTGGTGGGTTTCCCTACCGTGT	GGTCTCG	tata	ATGCCGCTGCCGAGCCAGGC	gttt	tgagacc	GGTACAGTAAGTGAGAATCCTCTCT	GGTCTTGACAAACGTGTGCTTGTAC
PA14_20650	1779014..1779033	yes	TATGAGGACGAATCTCCCGCTTATA	TAGTTGGTGGGTTTCCCTACCGTGT	GGTCTCG	tata	TCGGCGAGCCAGTCGGCCTT	gttt	tgagacc	GGTACAGTAAGTGAGAATCCTCTCT	GGTCTTGACAAACGTGTGCTTGTAC
PA14_20670	1779384..1779403	yes	TATGAGGACGAATCTCCCGCTTATA	TAGTTGGTGGGTTTCCCTACCGTGT	GGTCTCG	tata	GCCGCTGAGGAAGCCCTCGC	gttt	tgagacc	GGTACAGTAAGTGAGAATCCTCTCT	GGTCTTGACAAACGTGTGCTTGTAC
PA14_20680	1780848..1780867	yes	TATGAGGACGAATCTCCCGCTTATA	TAGTTGGTGGGTTTCCCTACCGTGT	GGTCTCG	tata	GGAGCCGGTGAGCATCAGCA	gttt	tgagacc	GGTACAGTAAGTGAGAATCCTCTCT	GGTCTTGACAAACGTGTGCTTGTAC
PA14_20690	1782157..1782176	yes	TATGAGGACGAATCTCCCGCTTATA	TAGTTGGTGGGTTTCCCTACCGTGT	GGTCTCG	tata	ATCAGGTGAAGGGAAAGCGT	gttt	tgagacc	GGTACAGTAAGTGAGAATCCTCTCT	GGTCTTGACAAACGTGTGCTTGTAC
PA14_20700	1783487..1783506	yes	TATGAGGACGAATCTCCCGCTTATA	TAGTTGGTGGGTTTCCCTACCGTGT	GGTCTCG	tata	GCTTCTTCGACGAACGGGTT	gttt	tgagacc	GGTACAGTAAGTGAGAATCCTCTCT	GGTCTTGACAAACGTGTGCTTGTAC
PA14_20720	1784028..1784047	yes	TATGAGGACGAATCTCCCGCTTATA	TAGTTGGTGGGTTTCCCTACCGTGT	GGTCTCG	tata	TCGAGCAGGGTAGGGGAGTC	gttt	tgagacc	GGTACAGTAAGTGAGAATCCTCTCT	GGTCTTGACAAACGTGTGCTTGTAC
PA14_20730	1784392..1784411	yes	TATGAGGACGAATCTCCCGCTTATA	TAGTTGGTGGGTTTCCCTACCGTGT	GGTCTCG	tata	GCGTGCTGCCGGGATTCAGC	gttt	tgagacc	GGTACAGTAAGTGAGAATCCTCTCT	GGTCTTGACAAACGTGTGCTTGTAC
PA14_20740	1785235..1785254	yes	TATGAGGACGAATCTCCCGCTTATA	TAGTTGGTGGGTTTCCCTACCGTGT	GGTCTCG	tata	GGCTGTTGTTAGCCGCGCAC	gttt	tgagacc	GGTACAGTAAGTGAGAATCCTCTCT	GGTCTTGACAAACGTGTGCTTGTAC
PA14_20750	1785413..1785432	yes	TATGAGGACGAATCTCCCGCTTATA	TAGTTGGTGGGTTTCCCTACCGTGT	GGTCTCG	tata	GTTGACTGAATCCAAAACAC	gttt	tgagacc	GGTACAGTAAGTGAGAATCCTCTCT	GGTCTTGACAAACGTGTGCTTGTAC
PA14_20760	1786459..1786478	yes	TATGAGGACGAATCTCCCGCTTATA	TAGTTGGTGGGTTTCCCTACCGTGT	GGTCTCG	tata	CAATGCCGCAGGTCTTCTCG	gttt	tgagacc	GGTACAGTAAGTGAGAATCCTCTCT	GGTCTTGACAAACGTGTGCTTGTAC
PA14_20770	1787561..1787580	yes	TATGAGGACGAATCTCCCGCTTATA	TAGTTGGTGGGTTTCCCTACCGTGT	GGTCTCG	tata	GGCCGAGGGCAGCGCAGTGA	gttt	tgagacc	GGTACAGTAAGTGAGAATCCTCTCT	GGTCTTGACAAACGTGTGCTTGTAC
PA14_20780	1787873..1787892	yes	TATGAGGACGAATCTCCCGCTTATA	TAGTTGGTGGGTTTCCCTACCGTGT	GGTCTCG	tata	AGGCTCTCGATCCGCGCCGC	gttt	tgagacc	GGTACAGTAAGTGAGAATCCTCTCT	GGTCTTGACAAACGTGTGCTTGTAC
PA14_20800	1789649..1789668	yes	TATGAGGACGAATCTCCCGCTTATA	TAGTTGGTGGGTTTCCCTACCGTGT	GGTCTCG	tata	ACGATCATCGAGATGCGGCG	gttt	tgagacc	GGTACAGTAAGTGAGAATCCTCTCT	GGTCTTGACAAACGTGTGCTTGTAC
PA14_20810	1790092..1790111	yes	TATGAGGACGAATCTCCCGCTTATA	TAGTTGGTGGGTTTCCCTACCGTGT	GGTCTCG	tata	AACGTCTTTGAGGATGCGTA	gttt	tgagacc	GGTACAGTAAGTGAGAATCCTCTCT	GGTCTTGACAAACGTGTGCTTGTAC
PA14_20820	1792326..1792345	yes	TATGAGGACGAATCTCCCGCTTATA	TAGTTGGTGGGTTTCCCTACCGTGT	GGTCTCG	tata	TGGAACGGGAGTCGTCCAAC	gttt	tgagacc	GGTACAGTAAGTGAGAATCCTCTCT	GGTCTTGACAAACGTGTGCTTGTAC
PA14_20840	1793640..1793659	yes	TATGAGGACGAATCTCCCGCTTATA	TAGTTGGTGGGTTTCCCTACCGTGT	GGTCTCG	tata	AGTGCGGTTGGCCGTTGGCC	gttt	tgagacc	GGTACAGTAAGTGAGAATCCTCTCT	GGTCTTGACAAACGTGTGCTTGTAC
PA14_20850	1794791..1794810	yes	TATGAGGACGAATCTCCCGCTTATA	TAGTTGGTGGGTTTCCCTACCGTGT	GGTCTCG	tata	ACGGGAAGTCTGGGCTAGCA	gttt	tgagacc	GGTACAGTAAGTGAGAATCCTCTCT	GGTCTTGACAAACGTGTGCTTGTAC
PA14_20860	1795474..1795493	yes	TATGAGGACGAATCTCCCGCTTATA	TAGTTGGTGGGTTTCCCTACCGTGT	GGTCTCG	tata	ATGACACGCAAGGCTTTACC	gttt	tgagacc	GGTACAGTAAGTGAGAATCCTCTCT	GGTCTTGACAAACGTGTGCTTGTAC
PA14_20870	1799680..1799699	yes	TATGAGGACGAATCTCCCGCTTATA	TAGTTGGTGGGTTTCCCTACCGTGT	GGTCTCG	tata	GCAGCAGTACGAGCAGCAGG	gttt	tgagacc	GGTACAGTAAGTGAGAATCCTCTCT	GGTCTTGACAAACGTGTGCTTGTAC
PA14_20880	1799782..1799801	yes	TATGAGGACGAATCTCCCGCTTATA	TAGTTGGTGGGTTTCCCTACCGTGT	GGTCTCG	tata	ACGATTTCGGGCTTGGCGGT	gttt	tgagacc	GGTACAGTAAGTGAGAATCCTCTCT	GGTCTTGACAAACGTGTGCTTGTAC
PA14_20890	1800162..1800181	yes	TATGAGGACGAATCTCCCGCTTATA	TAGTTGGTGGGTTTCCCTACCGTGT	GGTCTCG	tata	CCGGTGACGATGATGCTCAT	gttt	tgagacc	GGTACAGTAAGTGAGAATCCTCTCT	GGTCTTGACAAACGTGTGCTTGTAC
PA14_20900	1802306..1802325	yes	TATGAGGACGAATCTCCCGCTTATA	TAGTTGGTGGGTTTCCCTACCGTGT	GGTCTCG	tata	CCGAGCACGTAGACAATCAA	gttt	tgagacc	GGTACAGTAAGTGAGAATCCTCTCT	GGTCTTGACAAACGTGTGCTTGTAC
PA14_20920	1803084..1803103	yes	TATGAGGACGAATCTCCCGCTTATA	TAGTTGGTGGGTTTCCCTACCGTGT	GGTCTCG	tata	GCCAGGGTCATTATCGTCCT	gttt	tgagacc	GGTACAGTAAGTGAGAATCCTCTCT	GGTCTTGACAAACGTGTGCTTGTAC
PA14_20940	1803507..1803526	yes	TATGAGGACGAATCTCCCGCTTATA	TAGTTGGTGGGTTTCCCTACCGTGT	GGTCTCG	tata	AGATGGTCTTCCATGTCGTT	gttt	tgagacc	GGTACAGTAAGTGAGAATCCTCTCT	GGTCTTGACAAACGTGTGCTTGTAC
PA14_20950	1804513..1804532	yes	TATGAGGACGAATCTCCCGCTTATA	TAGTTGGTGGGTTTCCCTACCGTGT	GGTCTCG	tata	CCGCAGACCACGGCGGCGCG	gttt	tgagacc	GGTACAGTAAGTGAGAATCCTCTCT	GGTCTTGACAAACGTGTGCTTGTAC
PA14_20960	1804938..1804957	yes	TATGAGGACGAATCTCCCGCTTATA	TAGTTGGTGGGTTTCCCTACCGTGT	GGTCTCG	tata	GCTGTGGACGAGAATTTCCT	gttt	tgagacc	GGTACAGTAAGTGAGAATCCTCTCT	GGTCTTGACAAACGTGTGCTTGTAC
PA14_20970,PA14_20980	1806195..1806214	yes	TATGAGGACGAATCTCCCGCTTATA	TAGTTGGTGGGTTTCCCTACCGTGT	GGTCTCG	tata	CCCAGTCTCAGTTTGCGATC	gttt	tgagacc	GGTACAGTAAGTGAGAATCCTCTCT	GGTCTTGACAAACGTGTGCTTGTAC
PA14_20980	1807095..1807114	yes	TATGAGGACGAATCTCCCGCTTATA	TAGTTGGTGGGTTTCCCTACCGTGT	GGTCTCG	tata	CTGGGGCGAGAGAGGTTTGC	gttt	tgagacc	GGTACAGTAAGTGAGAATCCTCTCT	GGTCTTGACAAACGTGTGCTTGTAC
PA14_21000	1808428..1808447	yes	TATGAGGACGAATCTCCCGCTTATA	TAGTTGGTGGGTTTCCCTACCGTGT	GGTCTCG	tata	GGACAGCGGGCGTCGTATCT	gttt	tgagacc	GGTACAGTAAGTGAGAATCCTCTCT	GGTCTTGACAAACGTGTGCTTGTAC
PA14_21010	1809586..1809605	yes	TATGAGGACGAATCTCCCGCTTATA	TAGTTGGTGGGTTTCCCTACCGTGT	GGTCTCG	tata	CCGGCGATGACGATCTTCAG	gttt	tgagacc	GGTACAGTAAGTGAGAATCCTCTCT	GGTCTTGACAAACGTGTGCTTGTAC
PA14_21020	1816632..1816651	yes	TATGAGGACGAATCTCCCGCTTATA	TAGTTGGTGGGTTTCCCTACCGTGT	GGTCTCG	tata	TCCCGTTGGTAGGGCGATAG	gttt	tgagacc	GGTACAGTAAGTGAGAATCCTCTCT	GGTCTTGACAAACGTGTGCTTGTAC
PA14_21030	1817167..1817186	yes	TATGAGGACGAATCTCCCGCTTATA	TAGTTGGTGGGTTTCCCTACCGTGT	GGTCTCG	tata	GCCTTCGCGGTCCTTGTCAT	gttt	tgagacc	GGTACAGTAAGTGAGAATCCTCTCT	GGTCTTGACAAACGTGTGCTTGTAC
PA14_21040	1818961..1818980	yes	TATGAGGACGAATCTCCCGCTTATA	TAGTTGGTGGGTTTCCCTACCGTGT	GGTCTCG	tata	TGCGCTGGACCAGCTTGTGG	gttt	tgagacc	GGTACAGTAAGTGAGAATCCTCTCT	GGTCTTGACAAACGTGTGCTTGTAC
PA14_21050	1820749..1820768	yes	TATGAGGACGAATCTCCCGCTTATA	TAGTTGGTGGGTTTCCCTACCGTGT	GGTCTCG	tata	GCTGCAGGTCGGGGAGGGCG	gttt	tgagacc	GGTACAGTAAGTGAGAATCCTCTCT	GGTCTTGACAAACGTGTGCTTGTAC
PA14_21060	1821628..1821647	yes	TATGAGGACGAATCTCCCGCTTATA	TAGTTGGTGGGTTTCCCTACCGTGT	GGTCTCG	tata	AGTGGGTACCCAGGCGCCTT	gttt	tgagacc	GGTACAGTAAGTGAGAATCCTCTCT	GGTCTTGACAAACGTGTGCTTGTAC
PA14_21070	1822099..1822118	yes	TATGAGGACGAATCTCCCGCTTATA	TAGTTGGTGGGTTTCCCTACCGTGT	GGTCTCG	tata	CAGCAGGCCGCGGTCCTGGT	gttt	tgagacc	GGTACAGTAAGTGAGAATCCTCTCT	GGTCTTGACAAACGTGTGCTTGTAC
PA14_21080	1823661..1823680	yes	TATGAGGACGAATCTCCCGCTTATA	TAGTTGGTGGGTTTCCCTACCGTGT	GGTCTCG	tata	GGTTGAGGTCGATACGGCGT	gttt	tgagacc	GGTACAGTAAGTGAGAATCCTCTCT	GGTCTTGACAAACGTGTGCTTGTAC
PA14_21090	1823795..1823814	yes	TATGAGGACGAATCTCCCGCTTATA	TAGTTGGTGGGTTTCCCTACCGTGT	GGTCTCG	tata	ATCAGTACCATCAGATAATT	gttt	tgagacc	GGTACAGTAAGTGAGAATCCTCTCT	GGTCTTGACAAACGTGTGCTTGTAC
PA14_21110	1824508..1824527	yes	TATGAGGACGAATCTCCCGCTTATA	TAGTTGGTGGGTTTCCCTACCGTGT	GGTCTCG	tata	CGACCGTACCGGCGGCCAGG	gttt	tgagacc	GGTACAGTAAGTGAGAATCCTCTCT	GGTCTTGACAAACGTGTGCTTGTAC
PA14_21120	1827085..1827104	yes	TATGAGGACGAATCTCCCGCTTATA	TAGTTGGTGGGTTTCCCTACCGTGT	GGTCTCG	tata	CGGGGCGGGGCAGTGAAAAG	gttt	tgagacc	GGTACAGTAAGTGAGAATCCTCTCT	GGTCTTGACAAACGTGTGCTTGTAC
PA14_21130	1827875..1827894	yes	TATGAGGACGAATCTCCCGCTTATA	TAGTTGGTGGGTTTCCCTACCGTGT	GGTCTCG	tata	AGCAGTAGCGCGGATAGCAG	gttt	tgagacc	GGTACAGTAAGTGAGAATCCTCTCT	GGTCTTGACAAACGTGTGCTTGTAC
PA14_21140	1828756..1828775	yes	TATGAGGACGAATCTCCCGCTTATA	TAGTTGGTGGGTTTCCCTACCGTGT	GGTCTCG	tata	AGAGCAGCAGGCGCCAGGTC	gttt	tgagacc	GGTACAGTAAGTGAGAATCCTCTCT	GGTCTTGACAAACGTGTGCTTGTAC
PA14_21150	1829581..1829600	yes	TATGAGGACGAATCTCCCGCTTATA	TAGTTGGTGGGTTTCCCTACCGTGT	GGTCTCG	tata	GGGATCGCGCGGTGGAGAAG	gttt	tgagacc	GGTACAGTAAGTGAGAATCCTCTCT	GGTCTTGACAAACGTGTGCTTGTAC
PA14_21160	1830383..1830402	yes	TATGAGGACGAATCTCCCGCTTATA	TAGTTGGTGGGTTTCCCTACCGTGT	GGTCTCG	tata	GGTCCACGCCGTCGAGGCTC	gttt	tgagacc	GGTACAGTAAGTGAGAATCCTCTCT	GGTCTTGACAAACGTGTGCTTGTAC
PA14_21175	1831382..1831401	yes	TATGAGGACGAATCTCCCGCTTATA	TAGTTGGTGGGTTTCCCTACCGTGT	GGTCTCG	tata	CGTGCCCATTCGCTGCGTAT	gttt	tgagacc	GGTACAGTAAGTGAGAATCCTCTCT	GGTCTTGACAAACGTGTGCTTGTAC
PA14_21180	1831420..1831439	yes	TATGAGGACGAATCTCCCGCTTATA	TAGTTGGTGGGTTTCCCTACCGTGT	GGTCTCG	tata	GGCAAGGGAAGGCAGGGAAG	gttt	tgagacc	GGTACAGTAAGTGAGAATCCTCTCT	GGTCTTGACAAACGTGTGCTTGTAC
PA14_21190	1834639..1834658	yes	TATGAGGACGAATCTCCCGCTTATA	TAGTTGGTGGGTTTCCCTACCGTGT	GGTCTCG	tata	GGCATCTTCCCAGGGAGAAA	gttt	tgagacc	GGTACAGTAAGTGAGAATCCTCTCT	GGTCTTGACAAACGTGTGCTTGTAC
PA14_21210	1834849..1834868	yes	TATGAGGACGAATCTCCCGCTTATA	TAGTTGGTGGGTTTCCCTACCGTGT	GGTCTCG	tata	AGCCGGGTCGAACCGATAGC	gttt	tgagacc	GGTACAGTAAGTGAGAATCCTCTCT	GGTCTTGACAAACGTGTGCTTGTAC
PA14_21220	1836940..1836959	yes	TATGAGGACGAATCTCCCGCTTATA	TAGTTGGTGGGTTTCCCTACCGTGT	GGTCTCG	tata	TCCAGGGCGCGGTCGGAGAC	gttt	tgagacc	GGTACAGTAAGTGAGAATCCTCTCT	GGTCTTGACAAACGTGTGCTTGTAC
PA14_21230	1840090..1840109	yes	TATGAGGACGAATCTCCCGCTTATA	TAGTTGGTGGGTTTCCCTACCGTGT	GGTCTCG	tata	TCGCTGATCCAGCGTTGCCC	gttt	tgagacc	GGTACAGTAAGTGAGAATCCTCTCT	GGTCTTGACAAACGTGTGCTTGTAC
PA14_21240	1840378..1840397	yes	TATGAGGACGAATCTCCCGCTTATA	TAGTTGGTGGGTTTCCCTACCGTGT	GGTCTCG	tata	ATCAGGCCCTGGGGGATCGG	gttt	tgagacc	GGTACAGTAAGTGAGAATCCTCTCT	GGTCTTGACAAACGTGTGCTTGTAC
PA14_21250	1840739..1840758	yes	TATGAGGACGAATCTCCCGCTTATA	TAGTTGGTGGGTTTCCCTACCGTGT	GGTCTCG	tata	TCAGGGGTGCGTCGGCGAAC	gttt	tgagacc	GGTACAGTAAGTGAGAATCCTCTCT	GGTCTTGACAAACGTGTGCTTGTAC
PA14_21260	1841787..1841806	yes	TATGAGGACGAATCTCCCGCTTATA	TAGTTGGTGGGTTTCCCTACCGTGT	GGTCTCG	tata	CACCGAAGAAAGCGACCATG	gttt	tgagacc	GGTACAGTAAGTGAGAATCCTCTCT	GGTCTTGACAAACGTGTGCTTGTAC
PA14_21280	1842067..1842086	yes	TATGAGGACGAATCTCCCGCTTATA	TAGTTGGTGGGTTTCCCTACCGTGT	GGTCTCG	tata	AGGAACGGCTTCCAGTGAAT	gttt	tgagacc	GGTACAGTAAGTGAGAATCCTCTCT	GGTCTTGACAAACGTGTGCTTGTAC
PA14_21290	1844304..1844323	yes	TATGAGGACGAATCTCCCGCTTATA	TAGTTGGTGGGTTTCCCTACCGTGT	GGTCTCG	tata	GGCGGCAGCGACCACCAGCA	gttt	tgagacc	GGTACAGTAAGTGAGAATCCTCTCT	GGTCTTGACAAACGTGTGCTTGTAC
PA14_21300	1846259..1846278	yes	TATGAGGACGAATCTCCCGCTTATA	TAGTTGGTGGGTTTCCCTACCGTGT	GGTCTCG	tata	GGGATAGCAACAGCAAGCGA	gttt	tgagacc	GGTACAGTAAGTGAGAATCCTCTCT	GGTCTTGACAAACGTGTGCTTGTAC
PA14_21310	1846880..1846899	yes	TATGAGGACGAATCTCCCGCTTATA	TAGTTGGTGGGTTTCCCTACCGTGT	GGTCTCG	tata	CGTAGGGAATGTTCTGGACC	gttt	tgagacc	GGTACAGTAAGTGAGAATCCTCTCT	GGTCTTGACAAACGTGTGCTTGTAC
PA14_21320	1847829..1847848	yes	TATGAGGACGAATCTCCCGCTTATA	TAGTTGGTGGGTTTCCCTACCGTGT	GGTCTCG	tata	GGGAGCCAGTAGGCAGCGGC	gttt	tgagacc	GGTACAGTAAGTGAGAATCCTCTCT	GGTCTTGACAAACGTGTGCTTGTAC
PA14_21340	1848110..1848129	yes	TATGAGGACGAATCTCCCGCTTATA	TAGTTGGTGGGTTTCCCTACCGTGT	GGTCTCG	tata	CGTTTGTCGTTCCAGAATTC	gttt	tgagacc	GGTACAGTAAGTGAGAATCCTCTCT	GGTCTTGACAAACGTGTGCTTGTAC
PA14_21370	1850056..1850075	yes	TATGAGGACGAATCTCCCGCTTATA	TAGTTGGTGGGTTTCCCTACCGTGT	GGTCTCG	tata	TCTCGGCAGCAATACCCGCT	gttt	tgagacc	GGTACAGTAAGTGAGAATCCTCTCT	GGTCTTGACAAACGTGTGCTTGTAC
PA14_21380	1851791..1851810	yes	TATGAGGACGAATCTCCCGCTTATA	TAGTTGGTGGGTTTCCCTACCGTGT	GGTCTCG	tata	CGCTGCAGGCACGTCCGCAC	gttt	tgagacc	GGTACAGTAAGTGAGAATCCTCTCT	GGTCTTGACAAACGTGTGCTTGTAC
PA14_21400	1852227..1852246	yes	TATGAGGACGAATCTCCCGCTTATA	TAGTTGGTGGGTTTCCCTACCGTGT	GGTCTCG	tata	GTCGAGGGAAGGAGTCTGGT	gttt	tgagacc	GGTACAGTAAGTGAGAATCCTCTCT	GGTCTTGACAAACGTGTGCTTGTAC
PA14_21410	1857677..1857696	yes	TATGAGGACGAATCTCCCGCTTATA	TAGTTGGTGGGTTTCCCTACCGTGT	GGTCTCG	tata	GAGGGCGAGGGGATAACCTG	gttt	tgagacc	GGTACAGTAAGTGAGAATCCTCTCT	GGTCTTGACAAACGTGTGCTTGTAC
PA14_21440	1857936..1857955	yes	TATGAGGACGAATCTCCCGCTTATA	TAGTTGGTGGGTTTCCCTACCGTGT	GGTCTCG	tata	GATCTTGGCGAAGATGTTCT	gttt	tgagacc	GGTACAGTAAGTGAGAATCCTCTCT	GGTCTTGACAAACGTGTGCTTGTAC
PA14_21450	1858660..1858679	yes	TATGAGGACGAATCTCCCGCTTATA	TAGTTGGTGGGTTTCCCTACCGTGT	GGTCTCG	tata	AGGGGCGACTGATGCCTTCG	gttt	tgagacc	GGTACAGTAAGTGAGAATCCTCTCT	GGTCTTGACAAACGTGTGCTTGTAC
PA14_21460	1860659..1860678	yes	TATGAGGACGAATCTCCCGCTTATA	TAGTTGGTGGGTTTCCCTACCGTGT	GGTCTCG	tata	CTGGCCCAATGGCGGGGGTT	gttt	tgagacc	GGTACAGTAAGTGAGAATCCTCTCT	GGTCTTGACAAACGTGTGCTTGTAC
PA14_21460,PA14_21470	1861425..1861444	yes	TATGAGGACGAATCTCCCGCTTATA	TAGTTGGTGGGTTTCCCTACCGTGT	GGTCTCG	tata	CGGGGAAAAGCCGGGGCCGG	gttt	tgagacc	GGTACAGTAAGTGAGAATCCTCTCT	GGTCTTGACAAACGTGTGCTTGTAC
PA14_21480	1862552..1862571	yes	TATGAGGACGAATCTCCCGCTTATA	TAGTTGGTGGGTTTCCCTACCGTGT	GGTCTCG	tata	GAGAAAAGCCACCAGCCCAA	gttt	tgagacc	GGTACAGTAAGTGAGAATCCTCTCT	GGTCTTGACAAACGTGTGCTTGTAC
PA14_21490	1863081..1863100	yes	TATGAGGACGAATCTCCCGCTTATA	TAGTTGGTGGGTTTCCCTACCGTGT	GGTCTCG	tata	GCTATATGAAATCCAAAATT	gttt	tgagacc	GGTACAGTAAGTGAGAATCCTCTCT	GGTCTTGACAAACGTGTGCTTGTAC
PA14_21510	1866148..1866167	yes	TATGAGGACGAATCTCCCGCTTATA	TAGTTGGTGGGTTTCCCTACCGTGT	GGTCTCG	tata	GGATCGCTACGGCGTACATC	gttt	tgagacc	GGTACAGTAAGTGAGAATCCTCTCT	GGTCTTGACAAACGTGTGCTTGTAC
PA14_21520	1866261..1866280	yes	TATGAGGACGAATCTCCCGCTTATA	TAGTTGGTGGGTTTCCCTACCGTGT	GGTCTCG	tata	CGGCTCCGGAAGAACAGGCC	gttt	tgagacc	GGTACAGTAAGTGAGAATCCTCTCT	GGTCTTGACAAACGTGTGCTTGTAC
PA14_21530	1867251..1867270	yes	TATGAGGACGAATCTCCCGCTTATA	TAGTTGGTGGGTTTCCCTACCGTGT	GGTCTCG	tata	CAGTTCTGGGCGAGGGCTAT	gttt	tgagacc	GGTACAGTAAGTGAGAATCCTCTCT	GGTCTTGACAAACGTGTGCTTGTAC
PA14_21540	1867866..1867885	yes	TATGAGGACGAATCTCCCGCTTATA	TAGTTGGTGGGTTTCCCTACCGTGT	GGTCTCG	tata	CGGCGTGCTGGTCGTTGTAC	gttt	tgagacc	GGTACAGTAAGTGAGAATCCTCTCT	GGTCTTGACAAACGTGTGCTTGTAC
PA14_21550	1868938..1868957	yes	TATGAGGACGAATCTCCCGCTTATA	TAGTTGGTGGGTTTCCCTACCGTGT	GGTCTCG	tata	GCGAAAGGCTCGCTGCTCGC	gttt	tgagacc	GGTACAGTAAGTGAGAATCCTCTCT	GGTCTTGACAAACGTGTGCTTGTAC
PA14_21560	1869525..1869544	yes	TATGAGGACGAATCTCCCGCTTATA	TAGTTGGTGGGTTTCCCTACCGTGT	GGTCTCG	tata	ATCGAGAAAGTCGCTGGACC	gttt	tgagacc	GGTACAGTAAGTGAGAATCCTCTCT	GGTCTTGACAAACGTGTGCTTGTAC
PA14_21570	1870158..1870177	yes	TATGAGGACGAATCTCCCGCTTATA	TAGTTGGTGGGTTTCCCTACCGTGT	GGTCTCG	tata	GCCGACGACGGAGGAAGCGA	gttt	tgagacc	GGTACAGTAAGTGAGAATCCTCTCT	GGTCTTGACAAACGTGTGCTTGTAC
PA14_21580	1870503..1870522	yes	TATGAGGACGAATCTCCCGCTTATA	TAGTTGGTGGGTTTCCCTACCGTGT	GGTCTCG	tata	CGCGCGACGCAGGCCTAGCC	gttt	tgagacc	GGTACAGTAAGTGAGAATCCTCTCT	GGTCTTGACAAACGTGTGCTTGTAC
PA14_21590	1871334..1871353	yes	TATGAGGACGAATCTCCCGCTTATA	TAGTTGGTGGGTTTCCCTACCGTGT	GGTCTCG	tata	AACGCCGTTGCAAGGTCGTG	gttt	tgagacc	GGTACAGTAAGTGAGAATCCTCTCT	GGTCTTGACAAACGTGTGCTTGTAC
PA14_21600	1872097..1872116	yes	TATGAGGACGAATCTCCCGCTTATA	TAGTTGGTGGGTTTCCCTACCGTGT	GGTCTCG	tata	CGCTCGACGGGTGACGTCGA	gttt	tgagacc	GGTACAGTAAGTGAGAATCCTCTCT	GGTCTTGACAAACGTGTGCTTGTAC
PA14_21610	1872908..1872927	yes	TATGAGGACGAATCTCCCGCTTATA	TAGTTGGTGGGTTTCCCTACCGTGT	GGTCTCG	tata	CGAAGCCGAGCGAGTGCTTA	gttt	tgagacc	GGTACAGTAAGTGAGAATCCTCTCT	GGTCTTGACAAACGTGTGCTTGTAC
PA14_21620	1874721..1874740	yes	TATGAGGACGAATCTCCCGCTTATA	TAGTTGGTGGGTTTCCCTACCGTGT	GGTCTCG	tata	CGCCAGGCCCAGCAAACTCC	gttt	tgagacc	GGTACAGTAAGTGAGAATCCTCTCT	GGTCTTGACAAACGTGTGCTTGTAC
PA14_21630	1876188..1876207	yes	TATGAGGACGAATCTCCCGCTTATA	TAGTTGGTGGGTTTCCCTACCGTGT	GGTCTCG	tata	CAGCCCCCCGACGCCAATAC	gttt	tgagacc	GGTACAGTAAGTGAGAATCCTCTCT	GGTCTTGACAAACGTGTGCTTGTAC
PA14_21640	1876601..1876620	yes	TATGAGGACGAATCTCCCGCTTATA	TAGTTGGTGGGTTTCCCTACCGTGT	GGTCTCG	tata	CGGCACCGGTGATCATCATG	gttt	tgagacc	GGTACAGTAAGTGAGAATCCTCTCT	GGTCTTGACAAACGTGTGCTTGTAC
PA14_21650	1877651..1877670	yes	TATGAGGACGAATCTCCCGCTTATA	TAGTTGGTGGGTTTCCCTACCGTGT	GGTCTCG	tata	GCGGATGCAGCCATAGACGA	gttt	tgagacc	GGTACAGTAAGTGAGAATCCTCTCT	GGTCTTGACAAACGTGTGCTTGTAC
PA14_21660	1878068..1878087	yes	TATGAGGACGAATCTCCCGCTTATA	TAGTTGGTGGGTTTCCCTACCGTGT	GGTCTCG	tata	ACGCCGCGAGGACGAACCAG	gttt	tgagacc	GGTACAGTAAGTGAGAATCCTCTCT	GGTCTTGACAAACGTGTGCTTGTAC
PA14_21670	1878721..1878740	yes	TATGAGGACGAATCTCCCGCTTATA	TAGTTGGTGGGTTTCCCTACCGTGT	GGTCTCG	tata	GCGCTGGCGAGGGCGAAAAG	gttt	tgagacc	GGTACAGTAAGTGAGAATCCTCTCT	GGTCTTGACAAACGTGTGCTTGTAC
PA14_21680	1878710..1878729	yes	TATGAGGACGAATCTCCCGCTTATA	TAGTTGGTGGGTTTCCCTACCGTGT	GGTCTCG	tata	CGCCAGCGCCTGCGCCCTGC	gttt	tgagacc	GGTACAGTAAGTGAGAATCCTCTCT	GGTCTTGACAAACGTGTGCTTGTAC
PA14_21690	1879374..1879393	yes	TATGAGGACGAATCTCCCGCTTATA	TAGTTGGTGGGTTTCCCTACCGTGT	GGTCTCG	tata	CGGGCGGAAGAGGATGAAAT	gttt	tgagacc	GGTACAGTAAGTGAGAATCCTCTCT	GGTCTTGACAAACGTGTGCTTGTAC
PA14_21700	1887169..1887188	yes	TATGAGGACGAATCTCCCGCTTATA	TAGTTGGTGGGTTTCCCTACCGTGT	GGTCTCG	tata	GACCACGGCGATCAGCCCGA	gttt	tgagacc	GGTACAGTAAGTGAGAATCCTCTCT	GGTCTTGACAAACGTGTGCTTGTAC
PA14_21710	1887485..1887504	yes	TATGAGGACGAATCTCCCGCTTATA	TAGTTGGTGGGTTTCCCTACCGTGT	GGTCTCG	tata	ATCGGTAGCGGCTTGAACAT	gttt	tgagacc	GGTACAGTAAGTGAGAATCCTCTCT	GGTCTTGACAAACGTGTGCTTGTAC
PA14_21720	1888127..1888146	yes	TATGAGGACGAATCTCCCGCTTATA	TAGTTGGTGGGTTTCCCTACCGTGT	GGTCTCG	tata	TGTTCTCCGCTCGTCTCGTC	gttt	tgagacc	GGTACAGTAAGTGAGAATCCTCTCT	GGTCTTGACAAACGTGTGCTTGTAC
PA14_21730	1889082..1889101	yes	TATGAGGACGAATCTCCCGCTTATA	TAGTTGGTGGGTTTCCCTACCGTGT	GGTCTCG	tata	CAGGCGCGACAACGAACTCA	gttt	tgagacc	GGTACAGTAAGTGAGAATCCTCTCT	GGTCTTGACAAACGTGTGCTTGTAC
PA14_21750	1891419..1891438	yes	TATGAGGACGAATCTCCCGCTTATA	TAGTTGGTGGGTTTCCCTACCGTGT	GGTCTCG	tata	CAGGGCGAATTGCGAATGTT	gttt	tgagacc	GGTACAGTAAGTGAGAATCCTCTCT	GGTCTTGACAAACGTGTGCTTGTAC
PA14_21760	1893512..1893531	yes	TATGAGGACGAATCTCCCGCTTATA	TAGTTGGTGGGTTTCCCTACCGTGT	GGTCTCG	tata	GGCGTCGTTGAACCATTTTA	gttt	tgagacc	GGTACAGTAAGTGAGAATCCTCTCT	GGTCTTGACAAACGTGTGCTTGTAC
PA14_21770	1894059..1894078	yes	TATGAGGACGAATCTCCCGCTTATA	TAGTTGGTGGGTTTCCCTACCGTGT	GGTCTCG	tata	GGCGAAAAACAGGATGATCC	gttt	tgagacc	GGTACAGTAAGTGAGAATCCTCTCT	GGTCTTGACAAACGTGTGCTTGTAC
PA14_21780	1895131..1895150	yes	TATGAGGACGAATCTCCCGCTTATA	TAGTTGGTGGGTTTCCCTACCGTGT	GGTCTCG	tata	GAAACGGCTCAGGGCGGTCA	gttt	tgagacc	GGTACAGTAAGTGAGAATCCTCTCT	GGTCTTGACAAACGTGTGCTTGTAC
PA14_21790	1896137..1896156	yes	TATGAGGACGAATCTCCCGCTTATA	TAGTTGGTGGGTTTCCCTACCGTGT	GGTCTCG	tata	GGCGGTAGACGAGCAGATTG	gttt	tgagacc	GGTACAGTAAGTGAGAATCCTCTCT	GGTCTTGACAAACGTGTGCTTGTAC
PA14_24110,PA14_21800	2092506..2092525,1896365..1896384	yes	TATGAGGACGAATCTCCCGCTTATA	TAGTTGGTGGGTTTCCCTACCGTGT	GGTCTCG	tata	CCGCCGACCCTCTGCTTGTA	gttt	tgagacc	GGTACAGTAAGTGAGAATCCTCTCT	GGTCTTGACAAACGTGTGCTTGTAC
PA14_41200,PA14_24130,PA14_24120,PA14_21810	3675545..3675564,2092786..2092805,2092595..2092614,1896454..1896473	no	TATGAGGACGAATCTCCCGCTTATA	TAGTTGGTGGGTTTCCCTACCGTGT	GGTCTCG	tata	CGACCCCCGGCGTGACAGGC	gttt	tgagacc	GGTACAGTAAGTGAGAATCCTCTCT	GGTCTTGACAAACGTGTGCTTGTAC
PA14_21820	1896812..1896831	yes	TATGAGGACGAATCTCCCGCTTATA	TAGTTGGTGGGTTTCCCTACCGTGT	GGTCTCG	tata	GTTGGTCTGCGAATCGCAGC	gttt	tgagacc	GGTACAGTAAGTGAGAATCCTCTCT	GGTCTTGACAAACGTGTGCTTGTAC
PA14_21830	1897900..1897919	yes	TATGAGGACGAATCTCCCGCTTATA	TAGTTGGTGGGTTTCCCTACCGTGT	GGTCTCG	tata	AGGTAACGACTGAATCCTCG	gttt	tgagacc	GGTACAGTAAGTGAGAATCCTCTCT	GGTCTTGACAAACGTGTGCTTGTAC
PA14_21840	1899026..1899045	yes	TATGAGGACGAATCTCCCGCTTATA	TAGTTGGTGGGTTTCCCTACCGTGT	GGTCTCG	tata	TGCACAAACCAAGACTTCTC	gttt	tgagacc	GGTACAGTAAGTGAGAATCCTCTCT	GGTCTTGACAAACGTGTGCTTGTAC
PA14_21850	1899168..1899187	yes	TATGAGGACGAATCTCCCGCTTATA	TAGTTGGTGGGTTTCCCTACCGTGT	GGTCTCG	tata	CGCCGTCTCGCGTGATCACT	gttt	tgagacc	GGTACAGTAAGTGAGAATCCTCTCT	GGTCTTGACAAACGTGTGCTTGTAC
PA14_21860	1899852..1899871	yes	TATGAGGACGAATCTCCCGCTTATA	TAGTTGGTGGGTTTCCCTACCGTGT	GGTCTCG	tata	CGTAACCGAGGCGGGCGCGC	gttt	tgagacc	GGTACAGTAAGTGAGAATCCTCTCT	GGTCTTGACAAACGTGTGCTTGTAC
PA14_21870	1902089..1902108	yes	TATGAGGACGAATCTCCCGCTTATA	TAGTTGGTGGGTTTCCCTACCGTGT	GGTCTCG	tata	AAAAGGGCCGGTTGTGCAAC	gttt	tgagacc	GGTACAGTAAGTGAGAATCCTCTCT	GGTCTTGACAAACGTGTGCTTGTAC
PA14_21880	1904222..1904241	yes	TATGAGGACGAATCTCCCGCTTATA	TAGTTGGTGGGTTTCCCTACCGTGT	GGTCTCG	tata	AGGAGCAACAGGGCGGTACG	gttt	tgagacc	GGTACAGTAAGTGAGAATCCTCTCT	GGTCTTGACAAACGTGTGCTTGTAC
PA14_21890	1904441..1904460	yes	TATGAGGACGAATCTCCCGCTTATA	TAGTTGGTGGGTTTCCCTACCGTGT	GGTCTCG	tata	GCCCTGACCGCAGGACGGGG	gttt	tgagacc	GGTACAGTAAGTGAGAATCCTCTCT	GGTCTTGACAAACGTGTGCTTGTAC
PA14_21900	1905946..1905965	yes	TATGAGGACGAATCTCCCGCTTATA	TAGTTGGTGGGTTTCCCTACCGTGT	GGTCTCG	tata	TTCGGCGTCGCGGCGGACGA	gttt	tgagacc	GGTACAGTAAGTGAGAATCCTCTCT	GGTCTTGACAAACGTGTGCTTGTAC
PA14_21910	1906998..1907017	yes	TATGAGGACGAATCTCCCGCTTATA	TAGTTGGTGGGTTTCCCTACCGTGT	GGTCTCG	tata	GATATCGCGGAAGATGCTGG	gttt	tgagacc	GGTACAGTAAGTGAGAATCCTCTCT	GGTCTTGACAAACGTGTGCTTGTAC
PA14_21920	1907820..1907839	yes	TATGAGGACGAATCTCCCGCTTATA	TAGTTGGTGGGTTTCCCTACCGTGT	GGTCTCG	tata	AGGCGATGGTAGAGCGCGGC	gttt	tgagacc	GGTACAGTAAGTGAGAATCCTCTCT	GGTCTTGACAAACGTGTGCTTGTAC
PA14_21930	1908654..1908673	yes	TATGAGGACGAATCTCCCGCTTATA	TAGTTGGTGGGTTTCCCTACCGTGT	GGTCTCG	tata	CAGCAGCGCCAGCCATTTGC	gttt	tgagacc	GGTACAGTAAGTGAGAATCCTCTCT	GGTCTTGACAAACGTGTGCTTGTAC
PA14_21940	1909468..1909487	yes	TATGAGGACGAATCTCCCGCTTATA	TAGTTGGTGGGTTTCCCTACCGTGT	GGTCTCG	tata	GCAGGACGAGGATGACGTCG	gttt	tgagacc	GGTACAGTAAGTGAGAATCCTCTCT	GGTCTTGACAAACGTGTGCTTGTAC
PA14_21960	1910533..1910552	yes	TATGAGGACGAATCTCCCGCTTATA	TAGTTGGTGGGTTTCCCTACCGTGT	GGTCTCG	tata	CCGCTTCGGCGGCCAACGCC	gttt	tgagacc	GGTACAGTAAGTGAGAATCCTCTCT	GGTCTTGACAAACGTGTGCTTGTAC
PA14_21970	1910993..1911012	yes	TATGAGGACGAATCTCCCGCTTATA	TAGTTGGTGGGTTTCCCTACCGTGT	GGTCTCG	tata	CGGCAGATCGCCGTTACGGT	gttt	tgagacc	GGTACAGTAAGTGAGAATCCTCTCT	GGTCTTGACAAACGTGTGCTTGTAC
PA14_21980	1911769..1911788	yes	TATGAGGACGAATCTCCCGCTTATA	TAGTTGGTGGGTTTCCCTACCGTGT	GGTCTCG	tata	AGGTGCAGGTCGGACGAAAT	gttt	tgagacc	GGTACAGTAAGTGAGAATCCTCTCT	GGTCTTGACAAACGTGTGCTTGTAC
PA14_21990	1913598..1913617	yes	TATGAGGACGAATCTCCCGCTTATA	TAGTTGGTGGGTTTCCCTACCGTGT	GGTCTCG	tata	TGAGGAAATCGATCAGGCCC	gttt	tgagacc	GGTACAGTAAGTGAGAATCCTCTCT	GGTCTTGACAAACGTGTGCTTGTAC
PA14_22000	1914416..1914435	yes	TATGAGGACGAATCTCCCGCTTATA	TAGTTGGTGGGTTTCCCTACCGTGT	GGTCTCG	tata	ACGATTCGAATCTGGGACAG	gttt	tgagacc	GGTACAGTAAGTGAGAATCCTCTCT	GGTCTTGACAAACGTGTGCTTGTAC
PA14_22010	1914772..1914791	yes	TATGAGGACGAATCTCCCGCTTATA	TAGTTGGTGGGTTTCCCTACCGTGT	GGTCTCG	tata	GACTGCGAAAGAAGTCTAAA	gttt	tgagacc	GGTACAGTAAGTGAGAATCCTCTCT	GGTCTTGACAAACGTGTGCTTGTAC
PA14_22020	1915585..1915604	yes	TATGAGGACGAATCTCCCGCTTATA	TAGTTGGTGGGTTTCCCTACCGTGT	GGTCTCG	tata	GGAAGTGACTACGAGAATTT	gttt	tgagacc	GGTACAGTAAGTGAGAATCCTCTCT	GGTCTTGACAAACGTGTGCTTGTAC
PA14_22040	1916437..1916456	yes	TATGAGGACGAATCTCCCGCTTATA	TAGTTGGTGGGTTTCCCTACCGTGT	GGTCTCG	tata	CTTGATCGAGGAGGTCGGCT	gttt	tgagacc	GGTACAGTAAGTGAGAATCCTCTCT	GGTCTTGACAAACGTGTGCTTGTAC
PA14_22050	1916635..1916654	yes	TATGAGGACGAATCTCCCGCTTATA	TAGTTGGTGGGTTTCCCTACCGTGT	GGTCTCG	tata	GGAAAGCGCTGGAGAAACGG	gttt	tgagacc	GGTACAGTAAGTGAGAATCCTCTCT	GGTCTTGACAAACGTGTGCTTGTAC
PA14_22060	1917637..1917656	yes	TATGAGGACGAATCTCCCGCTTATA	TAGTTGGTGGGTTTCCCTACCGTGT	GGTCTCG	tata	CGGACGTGGGGCAAGGGGAT	gttt	tgagacc	GGTACAGTAAGTGAGAATCCTCTCT	GGTCTTGACAAACGTGTGCTTGTAC
PA14_22075	1919468..1919487	yes	TATGAGGACGAATCTCCCGCTTATA	TAGTTGGTGGGTTTCCCTACCGTGT	GGTCTCG	tata	GATTGCCGAGGTGGTCTTCG	gttt	tgagacc	GGTACAGTAAGTGAGAATCCTCTCT	GGTCTTGACAAACGTGTGCTTGTAC
PA14_22080	1922656..1922675	yes	TATGAGGACGAATCTCCCGCTTATA	TAGTTGGTGGGTTTCCCTACCGTGT	GGTCTCG	tata	GTTTGGAAGTGGATACTCGC	gttt	tgagacc	GGTACAGTAAGTGAGAATCCTCTCT	GGTCTTGACAAACGTGTGCTTGTAC
PA14_22090	1924106..1924125	yes	TATGAGGACGAATCTCCCGCTTATA	TAGTTGGTGGGTTTCCCTACCGTGT	GGTCTCG	tata	ACGTGTTGTGTTGGGTGTTG	gttt	tgagacc	GGTACAGTAAGTGAGAATCCTCTCT	GGTCTTGACAAACGTGTGCTTGTAC
PA14_22100	1927249..1927268	yes	TATGAGGACGAATCTCCCGCTTATA	TAGTTGGTGGGTTTCCCTACCGTGT	GGTCTCG	tata	AAGTTTTGAGTTGTTCTAGA	gttt	tgagacc	GGTACAGTAAGTGAGAATCCTCTCT	GGTCTTGACAAACGTGTGCTTGTAC
PA14_22110	1928394..1928413	yes	TATGAGGACGAATCTCCCGCTTATA	TAGTTGGTGGGTTTCCCTACCGTGT	GGTCTCG	tata	TCTGTAATAGATTGTTGTTG	gttt	tgagacc	GGTACAGTAAGTGAGAATCCTCTCT	GGTCTTGACAAACGTGTGCTTGTAC
PA14_22120	1931339..1931358	yes	TATGAGGACGAATCTCCCGCTTATA	TAGTTGGTGGGTTTCCCTACCGTGT	GGTCTCG	tata	TAAGCTGGGCAATAGTTTCT	gttt	tgagacc	GGTACAGTAAGTGAGAATCCTCTCT	GGTCTTGACAAACGTGTGCTTGTAC
PA14_22130	1932006..1932025	yes	TATGAGGACGAATCTCCCGCTTATA	TAGTTGGTGGGTTTCCCTACCGTGT	GGTCTCG	tata	GTGGTAATCGACTCCGGCAA	gttt	tgagacc	GGTACAGTAAGTGAGAATCCTCTCT	GGTCTTGACAAACGTGTGCTTGTAC
PA14_22140	1933794..1933813	yes	TATGAGGACGAATCTCCCGCTTATA	TAGTTGGTGGGTTTCCCTACCGTGT	GGTCTCG	tata	CTCTAGTAGAAGTGCATGAG	gttt	tgagacc	GGTACAGTAAGTGAGAATCCTCTCT	GGTCTTGACAAACGTGTGCTTGTAC
PA14_22160	1934825..1934844	yes	TATGAGGACGAATCTCCCGCTTATA	TAGTTGGTGGGTTTCCCTACCGTGT	GGTCTCG	tata	CTTTCTGAGGCCTGCTTAGG	gttt	tgagacc	GGTACAGTAAGTGAGAATCCTCTCT	GGTCTTGACAAACGTGTGCTTGTAC
PA14_22180	1935072..1935091	yes	TATGAGGACGAATCTCCCGCTTATA	TAGTTGGTGGGTTTCCCTACCGTGT	GGTCTCG	tata	TTAGAGACACTGCCAAGCTC	gttt	tgagacc	GGTACAGTAAGTGAGAATCCTCTCT	GGTCTTGACAAACGTGTGCTTGTAC
PA14_22190	1935458..1935477	yes	TATGAGGACGAATCTCCCGCTTATA	TAGTTGGTGGGTTTCCCTACCGTGT	GGTCTCG	tata	CGAAGCCGAGGGCACCAGCG	gttt	tgagacc	GGTACAGTAAGTGAGAATCCTCTCT	GGTCTTGACAAACGTGTGCTTGTAC
PA14_22210	1935876..1935895	yes	TATGAGGACGAATCTCCCGCTTATA	TAGTTGGTGGGTTTCCCTACCGTGT	GGTCTCG	tata	GGATTTTGTGTTTTCGATCT	gttt	tgagacc	GGTACAGTAAGTGAGAATCCTCTCT	GGTCTTGACAAACGTGTGCTTGTAC
PA14_22220	1936058..1936077	yes	TATGAGGACGAATCTCCCGCTTATA	TAGTTGGTGGGTTTCCCTACCGTGT	GGTCTCG	tata	TTGCTATCGAGGAAATAAGC	gttt	tgagacc	GGTACAGTAAGTGAGAATCCTCTCT	GGTCTTGACAAACGTGTGCTTGTAC
PA14_22230	1936826..1936845	yes	TATGAGGACGAATCTCCCGCTTATA	TAGTTGGTGGGTTTCCCTACCGTGT	GGTCTCG	tata	TGTCTTGAATCTGTTTCAGT	gttt	tgagacc	GGTACAGTAAGTGAGAATCCTCTCT	GGTCTTGACAAACGTGTGCTTGTAC
PA14_22240	1937664..1937683	yes	TATGAGGACGAATCTCCCGCTTATA	TAGTTGGTGGGTTTCCCTACCGTGT	GGTCTCG	tata	TGTTGGCGTTTGGTTTAGTC	gttt	tgagacc	GGTACAGTAAGTGAGAATCCTCTCT	GGTCTTGACAAACGTGTGCTTGTAC
PA14_22250	1938376..1938395	yes	TATGAGGACGAATCTCCCGCTTATA	TAGTTGGTGGGTTTCCCTACCGTGT	GGTCTCG	tata	TGGTTTGCTGTCCAGAACGT	gttt	tgagacc	GGTACAGTAAGTGAGAATCCTCTCT	GGTCTTGACAAACGTGTGCTTGTAC
PA14_22260	1938770..1938789	yes	TATGAGGACGAATCTCCCGCTTATA	TAGTTGGTGGGTTTCCCTACCGTGT	GGTCTCG	tata	AGGCTTCCATTTGGGCGATA	gttt	tgagacc	GGTACAGTAAGTGAGAATCCTCTCT	GGTCTTGACAAACGTGTGCTTGTAC
PA14_22270	1941266..1941285	yes	TATGAGGACGAATCTCCCGCTTATA	TAGTTGGTGGGTTTCCCTACCGTGT	GGTCTCG	tata	CGCACATAAGAGAAAGCAGA	gttt	tgagacc	GGTACAGTAAGTGAGAATCCTCTCT	GGTCTTGACAAACGTGTGCTTGTAC
PA14_22280	1941559..1941578	yes	TATGAGGACGAATCTCCCGCTTATA	TAGTTGGTGGGTTTCCCTACCGTGT	GGTCTCG	tata	TTCGAGGACATCACGGTAGC	gttt	tgagacc	GGTACAGTAAGTGAGAATCCTCTCT	GGTCTTGACAAACGTGTGCTTGTAC
PA14_22290	1942501..1942520	yes	TATGAGGACGAATCTCCCGCTTATA	TAGTTGGTGGGTTTCCCTACCGTGT	GGTCTCG	tata	CGAACATCCAGTGTGCGGTT	gttt	tgagacc	GGTACAGTAAGTGAGAATCCTCTCT	GGTCTTGACAAACGTGTGCTTGTAC
PA14_22310	1943868..1943887	yes	TATGAGGACGAATCTCCCGCTTATA	TAGTTGGTGGGTTTCCCTACCGTGT	GGTCTCG	tata	GCAGCGAAACGGAGGAAGTG	gttt	tgagacc	GGTACAGTAAGTGAGAATCCTCTCT	GGTCTTGACAAACGTGTGCTTGTAC
PA14_22320	1944225..1944244	yes	TATGAGGACGAATCTCCCGCTTATA	TAGTTGGTGGGTTTCCCTACCGTGT	GGTCTCG	tata	GTGCATGACGGTGAAGGTCA	gttt	tgagacc	GGTACAGTAAGTGAGAATCCTCTCT	GGTCTTGACAAACGTGTGCTTGTAC
PA14_22330	1944592..1944611	yes	TATGAGGACGAATCTCCCGCTTATA	TAGTTGGTGGGTTTCCCTACCGTGT	GGTCTCG	tata	CCACCGCCGCCGACATTGCC	gttt	tgagacc	GGTACAGTAAGTGAGAATCCTCTCT	GGTCTTGACAAACGTGTGCTTGTAC
PA14_22340	1945646..1945665	yes	TATGAGGACGAATCTCCCGCTTATA	TAGTTGGTGGGTTTCCCTACCGTGT	GGTCTCG	tata	GCGGATTGGTATCAATCCGC	gttt	tgagacc	GGTACAGTAAGTGAGAATCCTCTCT	GGTCTTGACAAACGTGTGCTTGTAC
PA14_22350	1945956..1945975	yes	TATGAGGACGAATCTCCCGCTTATA	TAGTTGGTGGGTTTCCCTACCGTGT	GGTCTCG	tata	GAAGGCCGCAAGGCCGAGCG	gttt	tgagacc	GGTACAGTAAGTGAGAATCCTCTCT	GGTCTTGACAAACGTGTGCTTGTAC
PA14_22370	1947685..1947704	yes	TATGAGGACGAATCTCCCGCTTATA	TAGTTGGTGGGTTTCCCTACCGTGT	GGTCTCG	tata	GAGGCGAAGTTGAAACTGTC	gttt	tgagacc	GGTACAGTAAGTGAGAATCCTCTCT	GGTCTTGACAAACGTGTGCTTGTAC
PA14_22380	1949485..1949504	yes	TATGAGGACGAATCTCCCGCTTATA	TAGTTGGTGGGTTTCCCTACCGTGT	GGTCTCG	tata	GCTGTCGGGCAACTTGACCA	gttt	tgagacc	GGTACAGTAAGTGAGAATCCTCTCT	GGTCTTGACAAACGTGTGCTTGTAC
PA14_22400	1950242..1950261	yes	TATGAGGACGAATCTCCCGCTTATA	TAGTTGGTGGGTTTCCCTACCGTGT	GGTCTCG	tata	CGCCGATCAGCAGCAGGATC	gttt	tgagacc	GGTACAGTAAGTGAGAATCCTCTCT	GGTCTTGACAAACGTGTGCTTGTAC
PA14_22410	1950651..1950670	yes	TATGAGGACGAATCTCCCGCTTATA	TAGTTGGTGGGTTTCCCTACCGTGT	GGTCTCG	tata	AGGGTGGCGAGCGTCTGGAT	gttt	tgagacc	GGTACAGTAAGTGAGAATCCTCTCT	GGTCTTGACAAACGTGTGCTTGTAC
PA14_22420	1952036..1952055	yes	TATGAGGACGAATCTCCCGCTTATA	TAGTTGGTGGGTTTCCCTACCGTGT	GGTCTCG	tata	GATGACGGCGGACACGACAG	gttt	tgagacc	GGTACAGTAAGTGAGAATCCTCTCT	GGTCTTGACAAACGTGTGCTTGTAC
PA14_22440	1954128..1954147	yes	TATGAGGACGAATCTCCCGCTTATA	TAGTTGGTGGGTTTCCCTACCGTGT	GGTCTCG	tata	GTTCGGAAGCGCTGCGGAAC	gttt	tgagacc	GGTACAGTAAGTGAGAATCCTCTCT	GGTCTTGACAAACGTGTGCTTGTAC
PA14_22450,PA14_22460	1954772..1954791	yes	TATGAGGACGAATCTCCCGCTTATA	TAGTTGGTGGGTTTCCCTACCGTGT	GGTCTCG	tata	GCAGGGTGCAGGTGGCGATC	gttt	tgagacc	GGTACAGTAAGTGAGAATCCTCTCT	GGTCTTGACAAACGTGTGCTTGTAC
PA14_22460	1955592..1955611	yes	TATGAGGACGAATCTCCCGCTTATA	TAGTTGGTGGGTTTCCCTACCGTGT	GGTCTCG	tata	CAGTCGCGGTGCTGGAAGTC	gttt	tgagacc	GGTACAGTAAGTGAGAATCCTCTCT	GGTCTTGACAAACGTGTGCTTGTAC
PA14_22470	1956522..1956541	yes	TATGAGGACGAATCTCCCGCTTATA	TAGTTGGTGGGTTTCCCTACCGTGT	GGTCTCG	tata	CATTGGTCCAGGGTTACGCG	gttt	tgagacc	GGTACAGTAAGTGAGAATCCTCTCT	GGTCTTGACAAACGTGTGCTTGTAC
PA14_22480	1956792..1956811	yes	TATGAGGACGAATCTCCCGCTTATA	TAGTTGGTGGGTTTCCCTACCGTGT	GGTCTCG	tata	GGATAGGCGAAAGCGGACAG	gttt	tgagacc	GGTACAGTAAGTGAGAATCCTCTCT	GGTCTTGACAAACGTGTGCTTGTAC
PA14_22490	1957224..1957243	yes	TATGAGGACGAATCTCCCGCTTATA	TAGTTGGTGGGTTTCCCTACCGTGT	GGTCTCG	tata	GCTCTCGATAACCAGGACAC	gttt	tgagacc	GGTACAGTAAGTGAGAATCCTCTCT	GGTCTTGACAAACGTGTGCTTGTAC
PA14_22500	1958813..1958832	yes	TATGAGGACGAATCTCCCGCTTATA	TAGTTGGTGGGTTTCCCTACCGTGT	GGTCTCG	tata	ATCCGGCAACTGCCGGTGGC	gttt	tgagacc	GGTACAGTAAGTGAGAATCCTCTCT	GGTCTTGACAAACGTGTGCTTGTAC
PA14_22510	1959307..1959326	yes	TATGAGGACGAATCTCCCGCTTATA	TAGTTGGTGGGTTTCCCTACCGTGT	GGTCTCG	tata	ATGGTCTTTGGAAAATTGCA	gttt	tgagacc	GGTACAGTAAGTGAGAATCCTCTCT	GGTCTTGACAAACGTGTGCTTGTAC
PA14_22520,PA14_22530	1960466..1960485	yes	TATGAGGACGAATCTCCCGCTTATA	TAGTTGGTGGGTTTCCCTACCGTGT	GGTCTCG	tata	CGCGGCCCTGACTGCCGGAC	gttt	tgagacc	GGTACAGTAAGTGAGAATCCTCTCT	GGTCTTGACAAACGTGTGCTTGTAC
PA14_22530	1961003..1961022	yes	TATGAGGACGAATCTCCCGCTTATA	TAGTTGGTGGGTTTCCCTACCGTGT	GGTCTCG	tata	GGCCAGCGAGCAAGAGCCGG	gttt	tgagacc	GGTACAGTAAGTGAGAATCCTCTCT	GGTCTTGACAAACGTGTGCTTGTAC
PA14_22540	1961621..1961640	yes	TATGAGGACGAATCTCCCGCTTATA	TAGTTGGTGGGTTTCCCTACCGTGT	GGTCTCG	tata	GCGCTTGGTATGGCCATATC	gttt	tgagacc	GGTACAGTAAGTGAGAATCCTCTCT	GGTCTTGACAAACGTGTGCTTGTAC
PA14_22550	1961933..1961952	yes	TATGAGGACGAATCTCCCGCTTATA	TAGTTGGTGGGTTTCCCTACCGTGT	GGTCTCG	tata	GTGCGTAAGGCTCAGGGCAC	gttt	tgagacc	GGTACAGTAAGTGAGAATCCTCTCT	GGTCTTGACAAACGTGTGCTTGTAC
PA14_22560	1963652..1963671	yes	TATGAGGACGAATCTCCCGCTTATA	TAGTTGGTGGGTTTCCCTACCGTGT	GGTCTCG	tata	GAGGGCGCCGCCGTGCAGGG	gttt	tgagacc	GGTACAGTAAGTGAGAATCCTCTCT	GGTCTTGACAAACGTGTGCTTGTAC
PA14_22570	1963967..1963986	yes	TATGAGGACGAATCTCCCGCTTATA	TAGTTGGTGGGTTTCCCTACCGTGT	GGTCTCG	tata	GTTGGGAGCGGCGCTGAGGA	gttt	tgagacc	GGTACAGTAAGTGAGAATCCTCTCT	GGTCTTGACAAACGTGTGCTTGTAC
PA14_22580	1964837..1964856	yes	TATGAGGACGAATCTCCCGCTTATA	TAGTTGGTGGGTTTCCCTACCGTGT	GGTCTCG	tata	GGCTGTAGTGGCGCAGGGAA	gttt	tgagacc	GGTACAGTAAGTGAGAATCCTCTCT	GGTCTTGACAAACGTGTGCTTGTAC
PA14_22590	1965027..1965046	yes	TATGAGGACGAATCTCCCGCTTATA	TAGTTGGTGGGTTTCCCTACCGTGT	GGTCTCG	tata	GTTCGAGGTGAAGCGTTGCG	gttt	tgagacc	GGTACAGTAAGTGAGAATCCTCTCT	GGTCTTGACAAACGTGTGCTTGTAC
PA14_22600	1965854..1965873	yes	TATGAGGACGAATCTCCCGCTTATA	TAGTTGGTGGGTTTCCCTACCGTGT	GGTCTCG	tata	TCCGTTGACTTGCGGTAACC	gttt	tgagacc	GGTACAGTAAGTGAGAATCCTCTCT	GGTCTTGACAAACGTGTGCTTGTAC
PA14_22620	1968234..1968253	yes	TATGAGGACGAATCTCCCGCTTATA	TAGTTGGTGGGTTTCCCTACCGTGT	GGTCTCG	tata	GGCGAGCGGTCGGGGAGGGT	gttt	tgagacc	GGTACAGTAAGTGAGAATCCTCTCT	GGTCTTGACAAACGTGTGCTTGTAC
PA14_22630	1968766..1968785	yes	TATGAGGACGAATCTCCCGCTTATA	TAGTTGGTGGGTTTCCCTACCGTGT	GGTCTCG	tata	TGTGGAAACGCTCGTCGTCA	gttt	tgagacc	GGTACAGTAAGTGAGAATCCTCTCT	GGTCTTGACAAACGTGTGCTTGTAC
PA14_22640	1968945..1968964	yes	TATGAGGACGAATCTCCCGCTTATA	TAGTTGGTGGGTTTCCCTACCGTGT	GGTCTCG	tata	CTGGACAAGGTTGTACGTTC	gttt	tgagacc	GGTACAGTAAGTGAGAATCCTCTCT	GGTCTTGACAAACGTGTGCTTGTAC
PA14_22650	1970587..1970606	yes	TATGAGGACGAATCTCCCGCTTATA	TAGTTGGTGGGTTTCCCTACCGTGT	GGTCTCG	tata	CAGGCGACGCAGCGGGCGAA	gttt	tgagacc	GGTACAGTAAGTGAGAATCCTCTCT	GGTCTTGACAAACGTGTGCTTGTAC
PA14_22660	1971525..1971544	yes	TATGAGGACGAATCTCCCGCTTATA	TAGTTGGTGGGTTTCCCTACCGTGT	GGTCTCG	tata	GATCAACACATGGTGGGCTC	gttt	tgagacc	GGTACAGTAAGTGAGAATCCTCTCT	GGTCTTGACAAACGTGTGCTTGTAC
PA14_22670	1972323..1972342	yes	TATGAGGACGAATCTCCCGCTTATA	TAGTTGGTGGGTTTCCCTACCGTGT	GGTCTCG	tata	TGATCGCCTGCGGGTTGTCC	gttt	tgagacc	GGTACAGTAAGTGAGAATCCTCTCT	GGTCTTGACAAACGTGTGCTTGTAC
PA14_22680	1973458..1973477	yes	TATGAGGACGAATCTCCCGCTTATA	TAGTTGGTGGGTTTCCCTACCGTGT	GGTCTCG	tata	AGGCTCACGTGGCCGGGTTG	gttt	tgagacc	GGTACAGTAAGTGAGAATCCTCTCT	GGTCTTGACAAACGTGTGCTTGTAC
PA14_22690	1974987..1975006	yes	TATGAGGACGAATCTCCCGCTTATA	TAGTTGGTGGGTTTCCCTACCGTGT	GGTCTCG	tata	GAGGATGCGTAGGGTCGGCA	gttt	tgagacc	GGTACAGTAAGTGAGAATCCTCTCT	GGTCTTGACAAACGTGTGCTTGTAC
PA14_22700	1975178..1975197	yes	TATGAGGACGAATCTCCCGCTTATA	TAGTTGGTGGGTTTCCCTACCGTGT	GGTCTCG	tata	GGTAAGACACGGATTGTCAG	gttt	tgagacc	GGTACAGTAAGTGAGAATCCTCTCT	GGTCTTGACAAACGTGTGCTTGTAC
PA14_22710	1975626..1975645	yes	TATGAGGACGAATCTCCCGCTTATA	TAGTTGGTGGGTTTCCCTACCGTGT	GGTCTCG	tata	GTGGGAAACGCGAGTGAGCA	gttt	tgagacc	GGTACAGTAAGTGAGAATCCTCTCT	GGTCTTGACAAACGTGTGCTTGTAC
PA14_22720	1976593..1976612	yes	TATGAGGACGAATCTCCCGCTTATA	TAGTTGGTGGGTTTCCCTACCGTGT	GGTCTCG	tata	TCATCGAGGAACAACGAAGC	gttt	tgagacc	GGTACAGTAAGTGAGAATCCTCTCT	GGTCTTGACAAACGTGTGCTTGTAC
PA14_22730	1977960..1977979	yes	TATGAGGACGAATCTCCCGCTTATA	TAGTTGGTGGGTTTCCCTACCGTGT	GGTCTCG	tata	GGGCCAGCCAGAAGGCGGCG	gttt	tgagacc	GGTACAGTAAGTGAGAATCCTCTCT	GGTCTTGACAAACGTGTGCTTGTAC
PA14_22740	1978522..1978541	yes	TATGAGGACGAATCTCCCGCTTATA	TAGTTGGTGGGTTTCCCTACCGTGT	GGTCTCG	tata	GGCGGCGGCGATGAACAGGG	gttt	tgagacc	GGTACAGTAAGTGAGAATCCTCTCT	GGTCTTGACAAACGTGTGCTTGTAC
PA14_22760	1979315..1979334	yes	TATGAGGACGAATCTCCCGCTTATA	TAGTTGGTGGGTTTCCCTACCGTGT	GGTCTCG	tata	CGAGCAGCTCGCAGAGCTCC	gttt	tgagacc	GGTACAGTAAGTGAGAATCCTCTCT	GGTCTTGACAAACGTGTGCTTGTAC
PA14_22770	1979714..1979733	yes	TATGAGGACGAATCTCCCGCTTATA	TAGTTGGTGGGTTTCCCTACCGTGT	GGTCTCG	tata	AGCAGGCAATGGGCAGTGGA	gttt	tgagacc	GGTACAGTAAGTGAGAATCCTCTCT	GGTCTTGACAAACGTGTGCTTGTAC
PA14_22780	1980179..1980198	yes	TATGAGGACGAATCTCCCGCTTATA	TAGTTGGTGGGTTTCCCTACCGTGT	GGTCTCG	tata	CTGGGAAGCGGGGATGTCAC	gttt	tgagacc	GGTACAGTAAGTGAGAATCCTCTCT	GGTCTTGACAAACGTGTGCTTGTAC
PA14_22800	1980764..1980783	yes	TATGAGGACGAATCTCCCGCTTATA	TAGTTGGTGGGTTTCCCTACCGTGT	GGTCTCG	tata	CGATGAAGAACAGGATCAGT	gttt	tgagacc	GGTACAGTAAGTGAGAATCCTCTCT	GGTCTTGACAAACGTGTGCTTGTAC
PA14_22820	1981047..1981066	yes	TATGAGGACGAATCTCCCGCTTATA	TAGTTGGTGGGTTTCCCTACCGTGT	GGTCTCG	tata	CGCCATCGGAGGCGGTACTG	gttt	tgagacc	GGTACAGTAAGTGAGAATCCTCTCT	GGTCTTGACAAACGTGTGCTTGTAC
PA14_22830	1981916..1981935	yes	TATGAGGACGAATCTCCCGCTTATA	TAGTTGGTGGGTTTCCCTACCGTGT	GGTCTCG	tata	CCGGATGGATCTGGAAGAAC	gttt	tgagacc	GGTACAGTAAGTGAGAATCCTCTCT	GGTCTTGACAAACGTGTGCTTGTAC
PA14_22840	1982724..1982743	yes	TATGAGGACGAATCTCCCGCTTATA	TAGTTGGTGGGTTTCCCTACCGTGT	GGTCTCG	tata	GCGGGCCCTCGAAGGCCTCG	gttt	tgagacc	GGTACAGTAAGTGAGAATCCTCTCT	GGTCTTGACAAACGTGTGCTTGTAC
PA14_22860	1983615..1983634	yes	TATGAGGACGAATCTCCCGCTTATA	TAGTTGGTGGGTTTCCCTACCGTGT	GGTCTCG	tata	CGAGTTCGTGGGGATCGGAC	gttt	tgagacc	GGTACAGTAAGTGAGAATCCTCTCT	GGTCTTGACAAACGTGTGCTTGTAC
PA14_22870	1984694..1984713	yes	TATGAGGACGAATCTCCCGCTTATA	TAGTTGGTGGGTTTCCCTACCGTGT	GGTCTCG	tata	GAGGGTGATCAGTTCGTTCA	gttt	tgagacc	GGTACAGTAAGTGAGAATCCTCTCT	GGTCTTGACAAACGTGTGCTTGTAC
PA14_22880	1985306..1985325	yes	TATGAGGACGAATCTCCCGCTTATA	TAGTTGGTGGGTTTCCCTACCGTGT	GGTCTCG	tata	GCGTTCCCCCTTTTTCGGCG	gttt	tgagacc	GGTACAGTAAGTGAGAATCCTCTCT	GGTCTTGACAAACGTGTGCTTGTAC
PA14_22890	1986489..1986508	yes	TATGAGGACGAATCTCCCGCTTATA	TAGTTGGTGGGTTTCCCTACCGTGT	GGTCTCG	tata	CGAAGCCGTTGATGGCCAGG	gttt	tgagacc	GGTACAGTAAGTGAGAATCCTCTCT	GGTCTTGACAAACGTGTGCTTGTAC
PA14_22910	1986657..1986676	yes	TATGAGGACGAATCTCCCGCTTATA	TAGTTGGTGGGTTTCCCTACCGTGT	GGTCTCG	tata	GGGTGACTTCGAGCACACGA	gttt	tgagacc	GGTACAGTAAGTGAGAATCCTCTCT	GGTCTTGACAAACGTGTGCTTGTAC
PA14_22930	1988619..1988638	yes	TATGAGGACGAATCTCCCGCTTATA	TAGTTGGTGGGTTTCCCTACCGTGT	GGTCTCG	tata	TGCCGCCGATATCGCCGACC	gttt	tgagacc	GGTACAGTAAGTGAGAATCCTCTCT	GGTCTTGACAAACGTGTGCTTGTAC
PA14_22940	1989678..1989697	yes	TATGAGGACGAATCTCCCGCTTATA	TAGTTGGTGGGTTTCCCTACCGTGT	GGTCTCG	tata	GAAGCCGGCGCGGCTCAGGT	gttt	tgagacc	GGTACAGTAAGTGAGAATCCTCTCT	GGTCTTGACAAACGTGTGCTTGTAC
PA14_22960	1990366..1990385	yes	TATGAGGACGAATCTCCCGCTTATA	TAGTTGGTGGGTTTCCCTACCGTGT	GGTCTCG	tata	ATGCGCCCGAGCAGCGAGCG	gttt	tgagacc	GGTACAGTAAGTGAGAATCCTCTCT	GGTCTTGACAAACGTGTGCTTGTAC
PA14_22980	1992320..1992339	yes	TATGAGGACGAATCTCCCGCTTATA	TAGTTGGTGGGTTTCCCTACCGTGT	GGTCTCG	tata	AGATGACGGCAGAGAGGCGA	gttt	tgagacc	GGTACAGTAAGTGAGAATCCTCTCT	GGTCTTGACAAACGTGTGCTTGTAC
PA14_22990	1993679..1993698	yes	TATGAGGACGAATCTCCCGCTTATA	TAGTTGGTGGGTTTCCCTACCGTGT	GGTCTCG	tata	CGTGGGATAGACAGGGGAAT	gttt	tgagacc	GGTACAGTAAGTGAGAATCCTCTCT	GGTCTTGACAAACGTGTGCTTGTAC
PA14_23000	1994610..1994629	yes	TATGAGGACGAATCTCCCGCTTATA	TAGTTGGTGGGTTTCCCTACCGTGT	GGTCTCG	tata	GACGCTGAAGCTCGGGTTCA	gttt	tgagacc	GGTACAGTAAGTGAGAATCCTCTCT	GGTCTTGACAAACGTGTGCTTGTAC
PA14_23010	1995482..1995501	yes	TATGAGGACGAATCTCCCGCTTATA	TAGTTGGTGGGTTTCCCTACCGTGT	GGTCTCG	tata	GTGCAGGTTGCGCAGTTCGA	gttt	tgagacc	GGTACAGTAAGTGAGAATCCTCTCT	GGTCTTGACAAACGTGTGCTTGTAC
PA14_23030	1996698..1996717	yes	TATGAGGACGAATCTCCCGCTTATA	TAGTTGGTGGGTTTCCCTACCGTGT	GGTCTCG	tata	AACGGTCCTGGCGGCCGGTC	gttt	tgagacc	GGTACAGTAAGTGAGAATCCTCTCT	GGTCTTGACAAACGTGTGCTTGTAC
PA14_23050	1998270..1998289	yes	TATGAGGACGAATCTCCCGCTTATA	TAGTTGGTGGGTTTCCCTACCGTGT	GGTCTCG	tata	GAATGAAAGAAACGCTGCAG	gttt	tgagacc	GGTACAGTAAGTGAGAATCCTCTCT	GGTCTTGACAAACGTGTGCTTGTAC
PA14_23060	1999942..1999961	yes	TATGAGGACGAATCTCCCGCTTATA	TAGTTGGTGGGTTTCCCTACCGTGT	GGTCTCG	tata	GGCTCTGGATCTGCTCCAGC	gttt	tgagacc	GGTACAGTAAGTGAGAATCCTCTCT	GGTCTTGACAAACGTGTGCTTGTAC
PA14_23070	2000165..2000184	yes	TATGAGGACGAATCTCCCGCTTATA	TAGTTGGTGGGTTTCCCTACCGTGT	GGTCTCG	tata	CAAGGCAGAACGCGGACATC	gttt	tgagacc	GGTACAGTAAGTGAGAATCCTCTCT	GGTCTTGACAAACGTGTGCTTGTAC
PA14_23080	2001642..2001661	yes	TATGAGGACGAATCTCCCGCTTATA	TAGTTGGTGGGTTTCCCTACCGTGT	GGTCTCG	tata	ACCTGCAGGCCGACGCCGGC	gttt	tgagacc	GGTACAGTAAGTGAGAATCCTCTCT	GGTCTTGACAAACGTGTGCTTGTAC
PA14_23090	2002360..2002379	yes	TATGAGGACGAATCTCCCGCTTATA	TAGTTGGTGGGTTTCCCTACCGTGT	GGTCTCG	tata	TGCGGGCGGTCTTCTGTTCA	gttt	tgagacc	GGTACAGTAAGTGAGAATCCTCTCT	GGTCTTGACAAACGTGTGCTTGTAC
PA14_23100	2003505..2003524	yes	TATGAGGACGAATCTCCCGCTTATA	TAGTTGGTGGGTTTCCCTACCGTGT	GGTCTCG	tata	GCTTGGCGCCGCTGAAGGGA	gttt	tgagacc	GGTACAGTAAGTGAGAATCCTCTCT	GGTCTTGACAAACGTGTGCTTGTAC
PA14_23110	2003699..2003718	yes	TATGAGGACGAATCTCCCGCTTATA	TAGTTGGTGGGTTTCCCTACCGTGT	GGTCTCG	tata	CGGTACGTGGGGATTCTCTG	gttt	tgagacc	GGTACAGTAAGTGAGAATCCTCTCT	GGTCTTGACAAACGTGTGCTTGTAC
PA14_23120	2004953..2004972	yes	TATGAGGACGAATCTCCCGCTTATA	TAGTTGGTGGGTTTCCCTACCGTGT	GGTCTCG	tata	GCATGCAGAGCGCGATAGCC	gttt	tgagacc	GGTACAGTAAGTGAGAATCCTCTCT	GGTCTTGACAAACGTGTGCTTGTAC
PA14_23130	2006318..2006337	yes	TATGAGGACGAATCTCCCGCTTATA	TAGTTGGTGGGTTTCCCTACCGTGT	GGTCTCG	tata	ATGGTATTGGACTGCTTGGG	gttt	tgagacc	GGTACAGTAAGTGAGAATCCTCTCT	GGTCTTGACAAACGTGTGCTTGTAC
PA14_23160	2007764..2007783	yes	TATGAGGACGAATCTCCCGCTTATA	TAGTTGGTGGGTTTCCCTACCGTGT	GGTCTCG	tata	AGGGCGTCCAGGTGCAATGT	gttt	tgagacc	GGTACAGTAAGTGAGAATCCTCTCT	GGTCTTGACAAACGTGTGCTTGTAC
PA14_23170	2008736..2008755	yes	TATGAGGACGAATCTCCCGCTTATA	TAGTTGGTGGGTTTCCCTACCGTGT	GGTCTCG	tata	AGAGGCTCATGTCGGGGGCG	gttt	tgagacc	GGTACAGTAAGTGAGAATCCTCTCT	GGTCTTGACAAACGTGTGCTTGTAC
PA14_23190	2009472..2009491	yes	TATGAGGACGAATCTCCCGCTTATA	TAGTTGGTGGGTTTCCCTACCGTGT	GGTCTCG	tata	CTGCAGCAGGCGATCGGTGG	gttt	tgagacc	GGTACAGTAAGTGAGAATCCTCTCT	GGTCTTGACAAACGTGTGCTTGTAC
PA14_23200	2010379..2010398	yes	TATGAGGACGAATCTCCCGCTTATA	TAGTTGGTGGGTTTCCCTACCGTGT	GGTCTCG	tata	GGTCGGGGCGGGCGGAGTAC	gttt	tgagacc	GGTACAGTAAGTGAGAATCCTCTCT	GGTCTTGACAAACGTGTGCTTGTAC
PA14_23210	2011083..2011102	yes	TATGAGGACGAATCTCCCGCTTATA	TAGTTGGTGGGTTTCCCTACCGTGT	GGTCTCG	tata	GTCCGGCGCCGTGTCGAGCA	gttt	tgagacc	GGTACAGTAAGTGAGAATCCTCTCT	GGTCTTGACAAACGTGTGCTTGTAC
PA14_23220	2011810..2011829	yes	TATGAGGACGAATCTCCCGCTTATA	TAGTTGGTGGGTTTCCCTACCGTGT	GGTCTCG	tata	CGAATTTGGCGATCTCGGCG	gttt	tgagacc	GGTACAGTAAGTGAGAATCCTCTCT	GGTCTTGACAAACGTGTGCTTGTAC
PA14_23240	2013306..2013325	yes	TATGAGGACGAATCTCCCGCTTATA	TAGTTGGTGGGTTTCCCTACCGTGT	GGTCTCG	tata	TCGAAGGGGTTACGGACGTT	gttt	tgagacc	GGTACAGTAAGTGAGAATCCTCTCT	GGTCTTGACAAACGTGTGCTTGTAC
PA14_23250	2013466..2013485	yes	TATGAGGACGAATCTCCCGCTTATA	TAGTTGGTGGGTTTCCCTACCGTGT	GGTCTCG	tata	CTCGATCGCCTTGACCCGCT	gttt	tgagacc	GGTACAGTAAGTGAGAATCCTCTCT	GGTCTTGACAAACGTGTGCTTGTAC
PA14_23260	2014770..2014789	yes	TATGAGGACGAATCTCCCGCTTATA	TAGTTGGTGGGTTTCCCTACCGTGT	GGTCTCG	tata	ATTGACCGGGAGAATTTCTT	gttt	tgagacc	GGTACAGTAAGTGAGAATCCTCTCT	GGTCTTGACAAACGTGTGCTTGTAC
PA14_23270	2017623..2017642	yes	TATGAGGACGAATCTCCCGCTTATA	TAGTTGGTGGGTTTCCCTACCGTGT	GGTCTCG	tata	GGGACCGGCGCAGAAATTGA	gttt	tgagacc	GGTACAGTAAGTGAGAATCCTCTCT	GGTCTTGACAAACGTGTGCTTGTAC
PA14_23280	2018703..2018722	yes	TATGAGGACGAATCTCCCGCTTATA	TAGTTGGTGGGTTTCCCTACCGTGT	GGTCTCG	tata	GCAAGGCCTTGAGCTGGTCC	gttt	tgagacc	GGTACAGTAAGTGAGAATCCTCTCT	GGTCTTGACAAACGTGTGCTTGTAC
PA14_23290	2019865..2019884	yes	TATGAGGACGAATCTCCCGCTTATA	TAGTTGGTGGGTTTCCCTACCGTGT	GGTCTCG	tata	CTGGGCCAGGGCAAGGAAAT	gttt	tgagacc	GGTACAGTAAGTGAGAATCCTCTCT	GGTCTTGACAAACGTGTGCTTGTAC
PA14_23310	2020978..2020997	yes	TATGAGGACGAATCTCCCGCTTATA	TAGTTGGTGGGTTTCCCTACCGTGT	GGTCTCG	tata	TTAGGGGTCGACTGTTGCAG	gttt	tgagacc	GGTACAGTAAGTGAGAATCCTCTCT	GGTCTTGACAAACGTGTGCTTGTAC
PA14_23320	2023218..2023237	yes	TATGAGGACGAATCTCCCGCTTATA	TAGTTGGTGGGTTTCCCTACCGTGT	GGTCTCG	tata	GGGCCATCGATGGCGAGCAT	gttt	tgagacc	GGTACAGTAAGTGAGAATCCTCTCT	GGTCTTGACAAACGTGTGCTTGTAC
PA14_23330	2024204..2024223	yes	TATGAGGACGAATCTCCCGCTTATA	TAGTTGGTGGGTTTCCCTACCGTGT	GGTCTCG	tata	TGGCACCCGGCTGCATGTCG	gttt	tgagacc	GGTACAGTAAGTGAGAATCCTCTCT	GGTCTTGACAAACGTGTGCTTGTAC
PA14_23340	2025980..2025999	yes	TATGAGGACGAATCTCCCGCTTATA	TAGTTGGTGGGTTTCCCTACCGTGT	GGTCTCG	tata	CCGTTCGATCAACTCCGACT	gttt	tgagacc	GGTACAGTAAGTGAGAATCCTCTCT	GGTCTTGACAAACGTGTGCTTGTAC
PA14_23350	2026316..2026335	yes	TATGAGGACGAATCTCCCGCTTATA	TAGTTGGTGGGTTTCCCTACCGTGT	GGTCTCG	tata	CACTAGCAGAACCGCTATAG	gttt	tgagacc	GGTACAGTAAGTGAGAATCCTCTCT	GGTCTTGACAAACGTGTGCTTGTAC
PA14_23360	2026880..2026899	yes	TATGAGGACGAATCTCCCGCTTATA	TAGTTGGTGGGTTTCCCTACCGTGT	GGTCTCG	tata	AAAATCGATTTCGTTACGCT	gttt	tgagacc	GGTACAGTAAGTGAGAATCCTCTCT	GGTCTTGACAAACGTGTGCTTGTAC
PA14_23370	2028123..2028142	yes	TATGAGGACGAATCTCCCGCTTATA	TAGTTGGTGGGTTTCCCTACCGTGT	GGTCTCG	tata	GGGGCCATTTTGATAGCCTC	gttt	tgagacc	GGTACAGTAAGTGAGAATCCTCTCT	GGTCTTGACAAACGTGTGCTTGTAC
PA14_23380	2029352..2029371	yes	TATGAGGACGAATCTCCCGCTTATA	TAGTTGGTGGGTTTCCCTACCGTGT	GGTCTCG	tata	GAAGCAAAAACGGCAGCTGT	gttt	tgagacc	GGTACAGTAAGTGAGAATCCTCTCT	GGTCTTGACAAACGTGTGCTTGTAC
PA14_23390	2030725..2030744	yes	TATGAGGACGAATCTCCCGCTTATA	TAGTTGGTGGGTTTCCCTACCGTGT	GGTCTCG	tata	AAATATGGGAAAGCTAACAA	gttt	tgagacc	GGTACAGTAAGTGAGAATCCTCTCT	GGTCTTGACAAACGTGTGCTTGTAC
PA14_23390,PA14_23400	2031898..2031917	yes	TATGAGGACGAATCTCCCGCTTATA	TAGTTGGTGGGTTTCCCTACCGTGT	GGTCTCG	tata	AAAAAAACTCATCCATGTCT	gttt	tgagacc	GGTACAGTAAGTGAGAATCCTCTCT	GGTCTTGACAAACGTGTGCTTGTAC
PA14_23410	2033254..2033273	yes	TATGAGGACGAATCTCCCGCTTATA	TAGTTGGTGGGTTTCCCTACCGTGT	GGTCTCG	tata	TCGTGAGCATTATAACAAAC	gttt	tgagacc	GGTACAGTAAGTGAGAATCCTCTCT	GGTCTTGACAAACGTGTGCTTGTAC
PA14_23420	2034253..2034272	yes	TATGAGGACGAATCTCCCGCTTATA	TAGTTGGTGGGTTTCCCTACCGTGT	GGTCTCG	tata	TGCCGGAGCGACCGTGACAC	gttt	tgagacc	GGTACAGTAAGTGAGAATCCTCTCT	GGTCTTGACAAACGTGTGCTTGTAC
PA14_01190	117117..117136	yes	TATGAGGACGAATCTCCCGCTTATA	TAGTTGGTGGGTTTCCCTACCGTGT	GGTCTCG	tata	AGGCGACGATGCTCAGGGCC	gttt	tgagacc	GGTACAGTAAGTGAGAATCCTCTCT	GGTCTTGACAAACGTGTGCTTGTAC
PA14_01200	118153..118172	yes	TATGAGGACGAATCTCCCGCTTATA	TAGTTGGTGGGTTTCCCTACCGTGT	GGTCTCG	tata	GTTGTTGGCGTACACCTCGT	gttt	tgagacc	GGTACAGTAAGTGAGAATCCTCTCT	GGTCTTGACAAACGTGTGCTTGTAC
PA14_01220	119301..119320	yes	TATGAGGACGAATCTCCCGCTTATA	TAGTTGGTGGGTTTCCCTACCGTGT	GGTCTCG	tata	CCACCGCGCGGATCGTCGTG	gttt	tgagacc	GGTACAGTAAGTGAGAATCCTCTCT	GGTCTTGACAAACGTGTGCTTGTAC
PA14_01230	120212..120231	yes	TATGAGGACGAATCTCCCGCTTATA	TAGTTGGTGGGTTTCCCTACCGTGT	GGTCTCG	tata	GGCAAGGAAGGCGGCTTCCT	gttt	tgagacc	GGTACAGTAAGTGAGAATCCTCTCT	GGTCTTGACAAACGTGTGCTTGTAC
PA14_01240	121792..121811	yes	TATGAGGACGAATCTCCCGCTTATA	TAGTTGGTGGGTTTCCCTACCGTGT	GGTCTCG	tata	TTAACGCCCCGCATACGGTC	gttt	tgagacc	GGTACAGTAAGTGAGAATCCTCTCT	GGTCTTGACAAACGTGTGCTTGTAC
PA14_01250	122749..122768	yes	TATGAGGACGAATCTCCCGCTTATA	TAGTTGGTGGGTTTCCCTACCGTGT	GGTCTCG	tata	GGCAACGTGTCCCGGAGGGA	gttt	tgagacc	GGTACAGTAAGTGAGAATCCTCTCT	GGTCTTGACAAACGTGTGCTTGTAC
PA14_01270	124453..124472	yes	TATGAGGACGAATCTCCCGCTTATA	TAGTTGGTGGGTTTCCCTACCGTGT	GGTCTCG	tata	CGAGCCCTTCGCCAACCGGC	gttt	tgagacc	GGTACAGTAAGTGAGAATCCTCTCT	GGTCTTGACAAACGTGTGCTTGTAC
PA14_01290	125308..125327	yes	TATGAGGACGAATCTCCCGCTTATA	TAGTTGGTGGGTTTCCCTACCGTGT	GGTCTCG	tata	AGGAAGCCCATCCAGACTCG	gttt	tgagacc	GGTACAGTAAGTGAGAATCCTCTCT	GGTCTTGACAAACGTGTGCTTGTAC
PA14_01300	126451..126470	yes	TATGAGGACGAATCTCCCGCTTATA	TAGTTGGTGGGTTTCCCTACCGTGT	GGTCTCG	tata	TGGTCGCCGGCATGGTGGTC	gttt	tgagacc	GGTACAGTAAGTGAGAATCCTCTCT	GGTCTTGACAAACGTGTGCTTGTAC
PA14_01310	128043..128062	yes	TATGAGGACGAATCTCCCGCTTATA	TAGTTGGTGGGTTTCCCTACCGTGT	GGTCTCG	tata	CAGGCGGCGGGTATCGACCT	gttt	tgagacc	GGTACAGTAAGTGAGAATCCTCTCT	GGTCTTGACAAACGTGTGCTTGTAC
PA14_01320	128606..128625	yes	TATGAGGACGAATCTCCCGCTTATA	TAGTTGGTGGGTTTCCCTACCGTGT	GGTCTCG	tata	CGGGGACGTAATAGTGTTCG	gttt	tgagacc	GGTACAGTAAGTGAGAATCCTCTCT	GGTCTTGACAAACGTGTGCTTGTAC
PA14_01330	129665..129684	yes	TATGAGGACGAATCTCCCGCTTATA	TAGTTGGTGGGTTTCCCTACCGTGT	GGTCTCG	tata	CCAGGGTAGCCAGCAGTAGC	gttt	tgagacc	GGTACAGTAAGTGAGAATCCTCTCT	GGTCTTGACAAACGTGTGCTTGTAC
PA14_01340	129749..129768	yes	TATGAGGACGAATCTCCCGCTTATA	TAGTTGGTGGGTTTCCCTACCGTGT	GGTCTCG	tata	GTCCGGCCTCCCCGAGGCGC	gttt	tgagacc	GGTACAGTAAGTGAGAATCCTCTCT	GGTCTTGACAAACGTGTGCTTGTAC
PA14_01340,PA14_01350	130510..130529	yes	TATGAGGACGAATCTCCCGCTTATA	TAGTTGGTGGGTTTCCCTACCGTGT	GGTCTCG	tata	CGGCGCGGACGTTCAGGCAT	gttt	tgagacc	GGTACAGTAAGTGAGAATCCTCTCT	GGTCTTGACAAACGTGTGCTTGTAC
PA14_01360	131151..131170	yes	TATGAGGACGAATCTCCCGCTTATA	TAGTTGGTGGGTTTCCCTACCGTGT	GGTCTCG	tata	GACGGTGAAACCGGGTTTGC	gttt	tgagacc	GGTACAGTAAGTGAGAATCCTCTCT	GGTCTTGACAAACGTGTGCTTGTAC
PA14_01380	132241..132260	yes	TATGAGGACGAATCTCCCGCTTATA	TAGTTGGTGGGTTTCCCTACCGTGT	GGTCTCG	tata	GCTGTGGCGATCGATGACGG	gttt	tgagacc	GGTACAGTAAGTGAGAATCCTCTCT	GGTCTTGACAAACGTGTGCTTGTAC
PA14_01390	133196..133215	yes	TATGAGGACGAATCTCCCGCTTATA	TAGTTGGTGGGTTTCCCTACCGTGT	GGTCTCG	tata	CAGGGCGACGAGGACGAGGA	gttt	tgagacc	GGTACAGTAAGTGAGAATCCTCTCT	GGTCTTGACAAACGTGTGCTTGTAC
PA14_01400	134263..134282	yes	TATGAGGACGAATCTCCCGCTTATA	TAGTTGGTGGGTTTCCCTACCGTGT	GGTCTCG	tata	GAGGTCGGCGTGGTGCTTGC	gttt	tgagacc	GGTACAGTAAGTGAGAATCCTCTCT	GGTCTTGACAAACGTGTGCTTGTAC
PA14_01410	134463..134482	yes	TATGAGGACGAATCTCCCGCTTATA	TAGTTGGTGGGTTTCCCTACCGTGT	GGTCTCG	tata	AGCACCCGCGCCAGCGAACA	gttt	tgagacc	GGTACAGTAAGTGAGAATCCTCTCT	GGTCTTGACAAACGTGTGCTTGTAC
PA14_01430	135169..135188	yes	TATGAGGACGAATCTCCCGCTTATA	TAGTTGGTGGGTTTCCCTACCGTGT	GGTCTCG	tata	TACCAGAACCGCTTTGCGCT	gttt	tgagacc	GGTACAGTAAGTGAGAATCCTCTCT	GGTCTTGACAAACGTGTGCTTGTAC
PA14_01440	135957..135976	yes	TATGAGGACGAATCTCCCGCTTATA	TAGTTGGTGGGTTTCCCTACCGTGT	GGTCTCG	tata	GTCCAGGCGAGGTAAGTGGT	gttt	tgagacc	GGTACAGTAAGTGAGAATCCTCTCT	GGTCTTGACAAACGTGTGCTTGTAC
PA14_01460	136744..136763	yes	TATGAGGACGAATCTCCCGCTTATA	TAGTTGGTGGGTTTCCCTACCGTGT	GGTCTCG	tata	CAGCGCTTGATGAACATCGC	gttt	tgagacc	GGTACAGTAAGTGAGAATCCTCTCT	GGTCTTGACAAACGTGTGCTTGTAC
PA14_01470	138146..138165	yes	TATGAGGACGAATCTCCCGCTTATA	TAGTTGGTGGGTTTCCCTACCGTGT	GGTCTCG	tata	GGCAACCGCGTTGACCAGCT	gttt	tgagacc	GGTACAGTAAGTGAGAATCCTCTCT	GGTCTTGACAAACGTGTGCTTGTAC
PA14_01480	138954..138973	yes	TATGAGGACGAATCTCCCGCTTATA	TAGTTGGTGGGTTTCCCTACCGTGT	GGTCTCG	tata	ATGGCTGGTGGGGCGCAGCG	gttt	tgagacc	GGTACAGTAAGTGAGAATCCTCTCT	GGTCTTGACAAACGTGTGCTTGTAC
PA14_01490	139874..139893	yes	TATGAGGACGAATCTCCCGCTTATA	TAGTTGGTGGGTTTCCCTACCGTGT	GGTCTCG	tata	GCCCACCGTGCCGATGGATT	gttt	tgagacc	GGTACAGTAAGTGAGAATCCTCTCT	GGTCTTGACAAACGTGTGCTTGTAC
PA14_01500	141128..141147	yes	TATGAGGACGAATCTCCCGCTTATA	TAGTTGGTGGGTTTCCCTACCGTGT	GGTCTCG	tata	CGAGCCCTTGTCCACCACAG	gttt	tgagacc	GGTACAGTAAGTGAGAATCCTCTCT	GGTCTTGACAAACGTGTGCTTGTAC
PA14_01510	141735..141754	yes	TATGAGGACGAATCTCCCGCTTATA	TAGTTGGTGGGTTTCCCTACCGTGT	GGTCTCG	tata	CCGCCTTGCGGGTCCACTTC	gttt	tgagacc	GGTACAGTAAGTGAGAATCCTCTCT	GGTCTTGACAAACGTGTGCTTGTAC
PA14_01520	141957..141976	yes	TATGAGGACGAATCTCCCGCTTATA	TAGTTGGTGGGTTTCCCTACCGTGT	GGTCTCG	tata	ATCGGCGCGGAACGAGACTA	gttt	tgagacc	GGTACAGTAAGTGAGAATCCTCTCT	GGTCTTGACAAACGTGTGCTTGTAC
PA14_01540	142760..142779	yes	TATGAGGACGAATCTCCCGCTTATA	TAGTTGGTGGGTTTCCCTACCGTGT	GGTCTCG	tata	AGGCCGCGCAGAACGCGTGT	gttt	tgagacc	GGTACAGTAAGTGAGAATCCTCTCT	GGTCTTGACAAACGTGTGCTTGTAC
PA14_01550	142894..142913	yes	TATGAGGACGAATCTCCCGCTTATA	TAGTTGGTGGGTTTCCCTACCGTGT	GGTCTCG	tata	GGCGGCCGAGGTTCGCAGGC	gttt	tgagacc	GGTACAGTAAGTGAGAATCCTCTCT	GGTCTTGACAAACGTGTGCTTGTAC
PA14_01560	143473..143492	no	TATGAGGACGAATCTCCCGCTTATA	TAGTTGGTGGGTTTCCCTACCGTGT	GGTCTCG	tata	GAGTTGCATTGGGGACAGGG	gttt	tgagacc	GGTACAGTAAGTGAGAATCCTCTCT	GGTCTTGACAAACGTGTGCTTGTAC
PA14_01580	145282..145301	yes	TATGAGGACGAATCTCCCGCTTATA	TAGTTGGTGGGTTTCCCTACCGTGT	GGTCTCG	tata	TTGTGAAGCCAGTACGACTT	gttt	tgagacc	GGTACAGTAAGTGAGAATCCTCTCT	GGTCTTGACAAACGTGTGCTTGTAC
PA14_01600	146941..146960	yes	TATGAGGACGAATCTCCCGCTTATA	TAGTTGGTGGGTTTCCCTACCGTGT	GGTCTCG	tata	GCCGTTGATCAGGTGGTGGA	gttt	tgagacc	GGTACAGTAAGTGAGAATCCTCTCT	GGTCTTGACAAACGTGTGCTTGTAC
PA14_01610	147311..147330	yes	TATGAGGACGAATCTCCCGCTTATA	TAGTTGGTGGGTTTCCCTACCGTGT	GGTCTCG	tata	CGGTGGGTACGGCTTGCGGG	gttt	tgagacc	GGTACAGTAAGTGAGAATCCTCTCT	GGTCTTGACAAACGTGTGCTTGTAC
PA14_01620	148660..148679	yes	TATGAGGACGAATCTCCCGCTTATA	TAGTTGGTGGGTTTCCCTACCGTGT	GGTCTCG	tata	GCGGGGCCACGTTGAGCGGC	gttt	tgagacc	GGTACAGTAAGTGAGAATCCTCTCT	GGTCTTGACAAACGTGTGCTTGTAC
PA14_01640	148830..148849	yes	TATGAGGACGAATCTCCCGCTTATA	TAGTTGGTGGGTTTCCCTACCGTGT	GGTCTCG	tata	GAGCGACGGGTTGCGGGATT	gttt	tgagacc	GGTACAGTAAGTGAGAATCCTCTCT	GGTCTTGACAAACGTGTGCTTGTAC
PA14_01660	151186..151205	yes	TATGAGGACGAATCTCCCGCTTATA	TAGTTGGTGGGTTTCCCTACCGTGT	GGTCTCG	tata	GGGGGGACGAAGTTGCCAGC	gttt	tgagacc	GGTACAGTAAGTGAGAATCCTCTCT	GGTCTTGACAAACGTGTGCTTGTAC
PA14_01670	152388..152407	yes	TATGAGGACGAATCTCCCGCTTATA	TAGTTGGTGGGTTTCCCTACCGTGT	GGTCTCG	tata	CGGCGCGAAGGAGGAAGGTG	gttt	tgagacc	GGTACAGTAAGTGAGAATCCTCTCT	GGTCTTGACAAACGTGTGCTTGTAC
PA14_01680	153965..153984	yes	TATGAGGACGAATCTCCCGCTTATA	TAGTTGGTGGGTTTCCCTACCGTGT	GGTCTCG	tata	CTGCCGGCCGCGCGGTTCCA	gttt	tgagacc	GGTACAGTAAGTGAGAATCCTCTCT	GGTCTTGACAAACGTGTGCTTGTAC
PA14_01690	155109..155128	yes	TATGAGGACGAATCTCCCGCTTATA	TAGTTGGTGGGTTTCCCTACCGTGT	GGTCTCG	tata	CGGAGTACCGGTGCGGACCA	gttt	tgagacc	GGTACAGTAAGTGAGAATCCTCTCT	GGTCTTGACAAACGTGTGCTTGTAC
PA14_01710	156171..156190	yes	TATGAGGACGAATCTCCCGCTTATA	TAGTTGGTGGGTTTCCCTACCGTGT	GGTCTCG	tata	TTGGACTTGAGTGTTGATCA	gttt	tgagacc	GGTACAGTAAGTGAGAATCCTCTCT	GGTCTTGACAAACGTGTGCTTGTAC
PA14_01720	156885..156904	yes	TATGAGGACGAATCTCCCGCTTATA	TAGTTGGTGGGTTTCCCTACCGTGT	GGTCTCG	tata	CTTCAACTGGGTTTTAAGAT	gttt	tgagacc	GGTACAGTAAGTGAGAATCCTCTCT	GGTCTTGACAAACGTGTGCTTGTAC
PA14_01730	159387..159406	yes	TATGAGGACGAATCTCCCGCTTATA	TAGTTGGTGGGTTTCCCTACCGTGT	GGTCTCG	tata	GGGCGCGCTGGCGACCTGCA	gttt	tgagacc	GGTACAGTAAGTGAGAATCCTCTCT	GGTCTTGACAAACGTGTGCTTGTAC
PA14_01750	159875..159894	yes	TATGAGGACGAATCTCCCGCTTATA	TAGTTGGTGGGTTTCCCTACCGTGT	GGTCTCG	tata	GGGTTTGCGAATCCAGGTGC	gttt	tgagacc	GGTACAGTAAGTGAGAATCCTCTCT	GGTCTTGACAAACGTGTGCTTGTAC
PA14_01760	161393..161412	yes	TATGAGGACGAATCTCCCGCTTATA	TAGTTGGTGGGTTTCCCTACCGTGT	GGTCTCG	tata	GCGGACAGAGGAAGGCTGGC	gttt	tgagacc	GGTACAGTAAGTGAGAATCCTCTCT	GGTCTTGACAAACGTGTGCTTGTAC
PA14_01770	163229..163248	yes	TATGAGGACGAATCTCCCGCTTATA	TAGTTGGTGGGTTTCCCTACCGTGT	GGTCTCG	tata	CGGGGCGGCACAGCACAGCA	gttt	tgagacc	GGTACAGTAAGTGAGAATCCTCTCT	GGTCTTGACAAACGTGTGCTTGTAC
PA14_01780	163895..163914	yes	TATGAGGACGAATCTCCCGCTTATA	TAGTTGGTGGGTTTCCCTACCGTGT	GGTCTCG	tata	GGCTGCTGGAACCGTTGGAT	gttt	tgagacc	GGTACAGTAAGTGAGAATCCTCTCT	GGTCTTGACAAACGTGTGCTTGTAC
PA14_01790	164564..164583	yes	TATGAGGACGAATCTCCCGCTTATA	TAGTTGGTGGGTTTCCCTACCGTGT	GGTCTCG	tata	CGGCCCGGCCAGGTAGATCG	gttt	tgagacc	GGTACAGTAAGTGAGAATCCTCTCT	GGTCTTGACAAACGTGTGCTTGTAC
PA14_01800	164839..164858	yes	TATGAGGACGAATCTCCCGCTTATA	TAGTTGGTGGGTTTCCCTACCGTGT	GGTCTCG	tata	ACATGCGGGATTGCGTGGGA	gttt	tgagacc	GGTACAGTAAGTGAGAATCCTCTCT	GGTCTTGACAAACGTGTGCTTGTAC
PA14_01810	166006..166025	yes	TATGAGGACGAATCTCCCGCTTATA	TAGTTGGTGGGTTTCCCTACCGTGT	GGTCTCG	tata	CGATGTCGATGATGGGTAGA	gttt	tgagacc	GGTACAGTAAGTGAGAATCCTCTCT	GGTCTTGACAAACGTGTGCTTGTAC
PA14_01830	167092..167111	yes	TATGAGGACGAATCTCCCGCTTATA	TAGTTGGTGGGTTTCCCTACCGTGT	GGTCTCG	tata	TGCAGGTGCAGTTCGGCCTT	gttt	tgagacc	GGTACAGTAAGTGAGAATCCTCTCT	GGTCTTGACAAACGTGTGCTTGTAC
PA14_01840	168218..168237	yes	TATGAGGACGAATCTCCCGCTTATA	TAGTTGGTGGGTTTCCCTACCGTGT	GGTCTCG	tata	CGCGCCGCCTCGCCGTCTGC	gttt	tgagacc	GGTACAGTAAGTGAGAATCCTCTCT	GGTCTTGACAAACGTGTGCTTGTAC
PA14_01860	168761..168780	yes	TATGAGGACGAATCTCCCGCTTATA	TAGTTGGTGGGTTTCCCTACCGTGT	GGTCTCG	tata	CGCGGCGTCGCTATCGGGTC	gttt	tgagacc	GGTACAGTAAGTGAGAATCCTCTCT	GGTCTTGACAAACGTGTGCTTGTAC
PA14_01870	169904..169923	yes	TATGAGGACGAATCTCCCGCTTATA	TAGTTGGTGGGTTTCCCTACCGTGT	GGTCTCG	tata	CAGGGCGAAGCGCGGGAACG	gttt	tgagacc	GGTACAGTAAGTGAGAATCCTCTCT	GGTCTTGACAAACGTGTGCTTGTAC
PA14_01890	172680..172699	yes	TATGAGGACGAATCTCCCGCTTATA	TAGTTGGTGGGTTTCCCTACCGTGT	GGTCTCG	tata	TTGAGGGTCTTGGAGATCGC	gttt	tgagacc	GGTACAGTAAGTGAGAATCCTCTCT	GGTCTTGACAAACGTGTGCTTGTAC
PA14_01900	173637..173656	no	TATGAGGACGAATCTCCCGCTTATA	TAGTTGGTGGGTTTCCCTACCGTGT	GGTCTCG	tata	GATGACGAAACGACGGCTTT	gttt	tgagacc	GGTACAGTAAGTGAGAATCCTCTCT	GGTCTTGACAAACGTGTGCTTGTAC
PA14_01910	174362..174381	yes	TATGAGGACGAATCTCCCGCTTATA	TAGTTGGTGGGTTTCCCTACCGTGT	GGTCTCG	tata	GGGTTTCCCGCAGCAGTTCG	gttt	tgagacc	GGTACAGTAAGTGAGAATCCTCTCT	GGTCTTGACAAACGTGTGCTTGTAC
PA14_01930	175189..175208	yes	TATGAGGACGAATCTCCCGCTTATA	TAGTTGGTGGGTTTCCCTACCGTGT	GGTCTCG	tata	CCAGGGTGGCGGAGTGTTCC	gttt	tgagacc	GGTACAGTAAGTGAGAATCCTCTCT	GGTCTTGACAAACGTGTGCTTGTAC
PA14_01940	176180..176199	yes	TATGAGGACGAATCTCCCGCTTATA	TAGTTGGTGGGTTTCCCTACCGTGT	GGTCTCG	tata	TTTGGAATGAAAAGCGCCTC	gttt	tgagacc	GGTACAGTAAGTGAGAATCCTCTCT	GGTCTTGACAAACGTGTGCTTGTAC
PA14_01960	177324..177343	yes	TATGAGGACGAATCTCCCGCTTATA	TAGTTGGTGGGTTTCCCTACCGTGT	GGTCTCG	tata	AACAGGCCGGCGAGGGAAAA	gttt	tgagacc	GGTACAGTAAGTGAGAATCCTCTCT	GGTCTTGACAAACGTGTGCTTGTAC
PA14_01970	178423..178442	yes	TATGAGGACGAATCTCCCGCTTATA	TAGTTGGTGGGTTTCCCTACCGTGT	GGTCTCG	tata	GGTACCAGACCAGGGACTGG	gttt	tgagacc	GGTACAGTAAGTGAGAATCCTCTCT	GGTCTTGACAAACGTGTGCTTGTAC
PA14_01980	181662..181681	yes	TATGAGGACGAATCTCCCGCTTATA	TAGTTGGTGGGTTTCCCTACCGTGT	GGTCTCG	tata	GCTGCCGCTGTCCACCACCC	gttt	tgagacc	GGTACAGTAAGTGAGAATCCTCTCT	GGTCTTGACAAACGTGTGCTTGTAC
PA14_01990	182693..182712	yes	TATGAGGACGAATCTCCCGCTTATA	TAGTTGGTGGGTTTCCCTACCGTGT	GGTCTCG	tata	GTATGGCGGCAGCAAGGATC	gttt	tgagacc	GGTACAGTAAGTGAGAATCCTCTCT	GGTCTTGACAAACGTGTGCTTGTAC
PA14_02010	183158..183177	yes	TATGAGGACGAATCTCCCGCTTATA	TAGTTGGTGGGTTTCCCTACCGTGT	GGTCTCG	tata	TCTTCGACTCATCGGGCTTT	gttt	tgagacc	GGTACAGTAAGTGAGAATCCTCTCT	GGTCTTGACAAACGTGTGCTTGTAC
PA14_02020	183473..183492	yes	TATGAGGACGAATCTCCCGCTTATA	TAGTTGGTGGGTTTCCCTACCGTGT	GGTCTCG	tata	CGCCAGCGCCATCGGCGTCA	gttt	tgagacc	GGTACAGTAAGTGAGAATCCTCTCT	GGTCTTGACAAACGTGTGCTTGTAC
PA14_02030	185574..185593	yes	TATGAGGACGAATCTCCCGCTTATA	TAGTTGGTGGGTTTCCCTACCGTGT	GGTCTCG	tata	ATCGGGCGGTGCAGTTCCGC	gttt	tgagacc	GGTACAGTAAGTGAGAATCCTCTCT	GGTCTTGACAAACGTGTGCTTGTAC
PA14_02050	185708..185727	yes	TATGAGGACGAATCTCCCGCTTATA	TAGTTGGTGGGTTTCCCTACCGTGT	GGTCTCG	tata	GGCGTAGGGAAGCGCGTGGG	gttt	tgagacc	GGTACAGTAAGTGAGAATCCTCTCT	GGTCTTGACAAACGTGTGCTTGTAC
PA14_02060	187988..188007	yes	TATGAGGACGAATCTCCCGCTTATA	TAGTTGGTGGGTTTCCCTACCGTGT	GGTCTCG	tata	GCATCACGGTGGCGAGTGTG	gttt	tgagacc	GGTACAGTAAGTGAGAATCCTCTCT	GGTCTTGACAAACGTGTGCTTGTAC
PA14_02070	189075..189094	yes	TATGAGGACGAATCTCCCGCTTATA	TAGTTGGTGGGTTTCCCTACCGTGT	GGTCTCG	tata	AGATGAGGTCGTTGGGGCGT	gttt	tgagacc	GGTACAGTAAGTGAGAATCCTCTCT	GGTCTTGACAAACGTGTGCTTGTAC
PA14_02090	190564..190583	yes	TATGAGGACGAATCTCCCGCTTATA	TAGTTGGTGGGTTTCCCTACCGTGT	GGTCTCG	tata	GTCGTGGGCGGGCACTGTCA	gttt	tgagacc	GGTACAGTAAGTGAGAATCCTCTCT	GGTCTTGACAAACGTGTGCTTGTAC
PA14_02100	191234..191253	yes	TATGAGGACGAATCTCCCGCTTATA	TAGTTGGTGGGTTTCCCTACCGTGT	GGTCTCG	tata	GCGAGGCCTTGCAGGGTGCT	gttt	tgagacc	GGTACAGTAAGTGAGAATCCTCTCT	GGTCTTGACAAACGTGTGCTTGTAC
PA14_02110	192491..192510	yes	TATGAGGACGAATCTCCCGCTTATA	TAGTTGGTGGGTTTCCCTACCGTGT	GGTCTCG	tata	CTGGAAACCGTCGGAGATCC	gttt	tgagacc	GGTACAGTAAGTGAGAATCCTCTCT	GGTCTTGACAAACGTGTGCTTGTAC
PA14_02130	193009..193028	yes	TATGAGGACGAATCTCCCGCTTATA	TAGTTGGTGGGTTTCCCTACCGTGT	GGTCTCG	tata	ACTGGGTGCCGGGTATGTGC	gttt	tgagacc	GGTACAGTAAGTGAGAATCCTCTCT	GGTCTTGACAAACGTGTGCTTGTAC
PA14_02140	193572..193591	yes	TATGAGGACGAATCTCCCGCTTATA	TAGTTGGTGGGTTTCCCTACCGTGT	GGTCTCG	tata	AGCTTTCACGCATGGCCAGC	gttt	tgagacc	GGTACAGTAAGTGAGAATCCTCTCT	GGTCTTGACAAACGTGTGCTTGTAC
PA14_02150	195534..195553	yes	TATGAGGACGAATCTCCCGCTTATA	TAGTTGGTGGGTTTCCCTACCGTGT	GGTCTCG	tata	CGGGACCAGTGCCAGGGCAC	gttt	tgagacc	GGTACAGTAAGTGAGAATCCTCTCT	GGTCTTGACAAACGTGTGCTTGTAC
PA14_02180	196895..196914	yes	TATGAGGACGAATCTCCCGCTTATA	TAGTTGGTGGGTTTCCCTACCGTGT	GGTCTCG	tata	TCGACGACCAGGACACTGAT	gttt	tgagacc	GGTACAGTAAGTGAGAATCCTCTCT	GGTCTTGACAAACGTGTGCTTGTAC
PA14_02190	197512..197531	yes	TATGAGGACGAATCTCCCGCTTATA	TAGTTGGTGGGTTTCCCTACCGTGT	GGTCTCG	tata	GCGGCGCGCCTTCCCGGGCC	gttt	tgagacc	GGTACAGTAAGTGAGAATCCTCTCT	GGTCTTGACAAACGTGTGCTTGTAC
PA14_02200	198365..198384	yes	TATGAGGACGAATCTCCCGCTTATA	TAGTTGGTGGGTTTCCCTACCGTGT	GGTCTCG	tata	ACCGGCGAAGGCGTGGAGGT	gttt	tgagacc	GGTACAGTAAGTGAGAATCCTCTCT	GGTCTTGACAAACGTGTGCTTGTAC
PA14_02220	200437..200456	yes	TATGAGGACGAATCTCCCGCTTATA	TAGTTGGTGGGTTTCCCTACCGTGT	GGTCTCG	tata	GAGGAGCGTGGCGATCCGGT	gttt	tgagacc	GGTACAGTAAGTGAGAATCCTCTCT	GGTCTTGACAAACGTGTGCTTGTAC
PA14_02230	200978..200997	yes	TATGAGGACGAATCTCCCGCTTATA	TAGTTGGTGGGTTTCCCTACCGTGT	GGTCTCG	tata	CCTGCGCCGGGCCGTTCGCC	gttt	tgagacc	GGTACAGTAAGTGAGAATCCTCTCT	GGTCTTGACAAACGTGTGCTTGTAC
PA14_02250	202901..202920	yes	TATGAGGACGAATCTCCCGCTTATA	TAGTTGGTGGGTTTCCCTACCGTGT	GGTCTCG	tata	AGAAACTGGCTCATATCCTG	gttt	tgagacc	GGTACAGTAAGTGAGAATCCTCTCT	GGTCTTGACAAACGTGTGCTTGTAC
PA14_02260	203288..203307	yes	TATGAGGACGAATCTCCCGCTTATA	TAGTTGGTGGGTTTCCCTACCGTGT	GGTCTCG	tata	GAGTCGTCGACGATCAGAAT	gttt	tgagacc	GGTACAGTAAGTGAGAATCCTCTCT	GGTCTTGACAAACGTGTGCTTGTAC
PA14_02270	204657..204676	yes	TATGAGGACGAATCTCCCGCTTATA	TAGTTGGTGGGTTTCCCTACCGTGT	GGTCTCG	tata	GGATGGTAACGAAACACCGA	gttt	tgagacc	GGTACAGTAAGTGAGAATCCTCTCT	GGTCTTGACAAACGTGTGCTTGTAC
PA14_02290	205786..205805	yes	TATGAGGACGAATCTCCCGCTTATA	TAGTTGGTGGGTTTCCCTACCGTGT	GGTCTCG	tata	GAAGCACTGGATATTGCTGA	gttt	tgagacc	GGTACAGTAAGTGAGAATCCTCTCT	GGTCTTGACAAACGTGTGCTTGTAC
PA14_02300	205939..205958	yes	TATGAGGACGAATCTCCCGCTTATA	TAGTTGGTGGGTTTCCCTACCGTGT	GGTCTCG	tata	GGCGAGGGATGCAGAGGATA	gttt	tgagacc	GGTACAGTAAGTGAGAATCCTCTCT	GGTCTTGACAAACGTGTGCTTGTAC
PA14_02310	208361..208380	yes	TATGAGGACGAATCTCCCGCTTATA	TAGTTGGTGGGTTTCCCTACCGTGT	GGTCTCG	tata	CGACGATCACCAGGAAGTTG	gttt	tgagacc	GGTACAGTAAGTGAGAATCCTCTCT	GGTCTTGACAAACGTGTGCTTGTAC
PA14_02330	209286..209305	yes	TATGAGGACGAATCTCCCGCTTATA	TAGTTGGTGGGTTTCCCTACCGTGT	GGTCTCG	tata	CGGGGTGCCCGTGGCGGGTG	gttt	tgagacc	GGTACAGTAAGTGAGAATCCTCTCT	GGTCTTGACAAACGTGTGCTTGTAC
PA14_02340	210893..210912	yes	TATGAGGACGAATCTCCCGCTTATA	TAGTTGGTGGGTTTCCCTACCGTGT	GGTCTCG	tata	CCGGCTCCAGGCGGGCGAAA	gttt	tgagacc	GGTACAGTAAGTGAGAATCCTCTCT	GGTCTTGACAAACGTGTGCTTGTAC
PA14_02360	211223..211242	yes	TATGAGGACGAATCTCCCGCTTATA	TAGTTGGTGGGTTTCCCTACCGTGT	GGTCTCG	tata	CGCGGCGAACAGACCGAGCA	gttt	tgagacc	GGTACAGTAAGTGAGAATCCTCTCT	GGTCTTGACAAACGTGTGCTTGTAC
PA14_02370	213589..213608	yes	TATGAGGACGAATCTCCCGCTTATA	TAGTTGGTGGGTTTCCCTACCGTGT	GGTCTCG	tata	CGGAAAGCGTGCCGGCGACC	gttt	tgagacc	GGTACAGTAAGTGAGAATCCTCTCT	GGTCTTGACAAACGTGTGCTTGTAC
PA14_02380	213907..213926	yes	TATGAGGACGAATCTCCCGCTTATA	TAGTTGGTGGGTTTCCCTACCGTGT	GGTCTCG	tata	GAGCAAGAGCGAAGGGCATA	gttt	tgagacc	GGTACAGTAAGTGAGAATCCTCTCT	GGTCTTGACAAACGTGTGCTTGTAC
PA14_02390	215524..215543	yes	TATGAGGACGAATCTCCCGCTTATA	TAGTTGGTGGGTTTCCCTACCGTGT	GGTCTCG	tata	GGGCGATGAAGTAACGCAGT	gttt	tgagacc	GGTACAGTAAGTGAGAATCCTCTCT	GGTCTTGACAAACGTGTGCTTGTAC
PA14_02410	215925..215944	yes	TATGAGGACGAATCTCCCGCTTATA	TAGTTGGTGGGTTTCCCTACCGTGT	GGTCTCG	tata	GCGTTCGGCGGAGCGGCAAG	gttt	tgagacc	GGTACAGTAAGTGAGAATCCTCTCT	GGTCTTGACAAACGTGTGCTTGTAC
PA14_02420	218343..218362	yes	TATGAGGACGAATCTCCCGCTTATA	TAGTTGGTGGGTTTCCCTACCGTGT	GGTCTCG	tata	GAGCCGTACCGGCGTGGCGA	gttt	tgagacc	GGTACAGTAAGTGAGAATCCTCTCT	GGTCTTGACAAACGTGTGCTTGTAC
PA14_02435	219299..219318	yes	TATGAGGACGAATCTCCCGCTTATA	TAGTTGGTGGGTTTCCCTACCGTGT	GGTCTCG	tata	GTTGCCGGGCGGTGGCGGAT	gttt	tgagacc	GGTACAGTAAGTGAGAATCCTCTCT	GGTCTTGACAAACGTGTGCTTGTAC
PA14_02450	220865..220884	yes	TATGAGGACGAATCTCCCGCTTATA	TAGTTGGTGGGTTTCCCTACCGTGT	GGTCTCG	tata	AACCCGCGTCTCACCGGCAT	gttt	tgagacc	GGTACAGTAAGTGAGAATCCTCTCT	GGTCTTGACAAACGTGTGCTTGTAC
PA14_02460	222063..222082	yes	TATGAGGACGAATCTCCCGCTTATA	TAGTTGGTGGGTTTCCCTACCGTGT	GGTCTCG	tata	CGGCCAGCACGAAGATGATC	gttt	tgagacc	GGTACAGTAAGTGAGAATCCTCTCT	GGTCTTGACAAACGTGTGCTTGTAC
PA14_02470	222353..222372	yes	TATGAGGACGAATCTCCCGCTTATA	TAGTTGGTGGGTTTCCCTACCGTGT	GGTCTCG	tata	TGAGGTACAGGAGGGTGACC	gttt	tgagacc	GGTACAGTAAGTGAGAATCCTCTCT	GGTCTTGACAAACGTGTGCTTGTAC
PA14_02490	224129..224148	yes	TATGAGGACGAATCTCCCGCTTATA	TAGTTGGTGGGTTTCCCTACCGTGT	GGTCTCG	tata	GCGGGCATCGACGGGCTGGG	gttt	tgagacc	GGTACAGTAAGTGAGAATCCTCTCT	GGTCTTGACAAACGTGTGCTTGTAC
PA14_02500	224976..224995	yes	TATGAGGACGAATCTCCCGCTTATA	TAGTTGGTGGGTTTCCCTACCGTGT	GGTCTCG	tata	TTCGACGGATTCGAGCGGGG	gttt	tgagacc	GGTACAGTAAGTGAGAATCCTCTCT	GGTCTTGACAAACGTGTGCTTGTAC
PA14_23430	2036389..2036408	yes	TATGAGGACGAATCTCCCGCTTATA	TAGTTGGTGGGTTTCCCTACCGTGT	GGTCTCG	tata	ACCGAAGCGTATGATAGAGA	gttt	tgagacc	GGTACAGTAAGTGAGAATCCTCTCT	GGTCTTGACAAACGTGTGCTTGTAC
PA14_23440	2038097..2038116	yes	TATGAGGACGAATCTCCCGCTTATA	TAGTTGGTGGGTTTCCCTACCGTGT	GGTCTCG	tata	TTCTGGAAGCGCCCCAAGCA	gttt	tgagacc	GGTACAGTAAGTGAGAATCCTCTCT	GGTCTTGACAAACGTGTGCTTGTAC
PA14_23450	2039434..2039453	yes	TATGAGGACGAATCTCCCGCTTATA	TAGTTGGTGGGTTTCCCTACCGTGT	GGTCTCG	tata	AAACTCACTCAAAGGGTCGC	gttt	tgagacc	GGTACAGTAAGTGAGAATCCTCTCT	GGTCTTGACAAACGTGTGCTTGTAC
PA14_23460	2040173..2040192	yes	TATGAGGACGAATCTCCCGCTTATA	TAGTTGGTGGGTTTCCCTACCGTGT	GGTCTCG	tata	AAAGAAAGCCCCATAACTAC	gttt	tgagacc	GGTACAGTAAGTGAGAATCCTCTCT	GGTCTTGACAAACGTGTGCTTGTAC
PA14_23470	2041639..2041658	yes	TATGAGGACGAATCTCCCGCTTATA	TAGTTGGTGGGTTTCCCTACCGTGT	GGTCTCG	tata	TGTACCTGCGAGGCATCCCG	gttt	tgagacc	GGTACAGTAAGTGAGAATCCTCTCT	GGTCTTGACAAACGTGTGCTTGTAC
PA14_23480	2043806..2043825	yes	TATGAGGACGAATCTCCCGCTTATA	TAGTTGGTGGGTTTCCCTACCGTGT	GGTCTCG	tata	GAAGCAGAGCGGATTTGATT	gttt	tgagacc	GGTACAGTAAGTGAGAATCCTCTCT	GGTCTTGACAAACGTGTGCTTGTAC
PA14_23490,PA14_60180	2044252..2044271,5359617..5359636	no	TATGAGGACGAATCTCCCGCTTATA	TAGTTGGTGGGTTTCCCTACCGTGT	GGTCTCG	tata	CTCTACCGACTGAGCTATCG	gttt	tgagacc	GGTACAGTAAGTGAGAATCCTCTCT	GGTCTTGACAAACGTGTGCTTGTAC
PA14_23500	2045502..2045521	yes	TATGAGGACGAATCTCCCGCTTATA	TAGTTGGTGGGTTTCCCTACCGTGT	GGTCTCG	tata	ATCACGCGGTGCCATTTCGA	gttt	tgagacc	GGTACAGTAAGTGAGAATCCTCTCT	GGTCTTGACAAACGTGTGCTTGTAC
PA14_23510	2045742..2045761	yes	TATGAGGACGAATCTCCCGCTTATA	TAGTTGGTGGGTTTCCCTACCGTGT	GGTCTCG	tata	GCTTGAAGCGCGAGTCGAGT	gttt	tgagacc	GGTACAGTAAGTGAGAATCCTCTCT	GGTCTTGACAAACGTGTGCTTGTAC
PA14_23520	2049211..2049230	yes	TATGAGGACGAATCTCCCGCTTATA	TAGTTGGTGGGTTTCCCTACCGTGT	GGTCTCG	tata	CGCCATGAATGCGCCGAGCA	gttt	tgagacc	GGTACAGTAAGTGAGAATCCTCTCT	GGTCTTGACAAACGTGTGCTTGTAC
PA14_23530	2050334..2050353	yes	TATGAGGACGAATCTCCCGCTTATA	TAGTTGGTGGGTTTCCCTACCGTGT	GGTCTCG	tata	AGTGTTCCGTCGGCAAAATT	gttt	tgagacc	GGTACAGTAAGTGAGAATCCTCTCT	GGTCTTGACAAACGTGTGCTTGTAC
PA14_23540	2050461..2050480	yes	TATGAGGACGAATCTCCCGCTTATA	TAGTTGGTGGGTTTCCCTACCGTGT	GGTCTCG	tata	GCTGTGGTACTCCACCACGC	gttt	tgagacc	GGTACAGTAAGTGAGAATCCTCTCT	GGTCTTGACAAACGTGTGCTTGTAC
PA14_23560	2051395..2051414	yes	TATGAGGACGAATCTCCCGCTTATA	TAGTTGGTGGGTTTCCCTACCGTGT	GGTCTCG	tata	GGCGATGCGAGTACGAACAG	gttt	tgagacc	GGTACAGTAAGTGAGAATCCTCTCT	GGTCTTGACAAACGTGTGCTTGTAC
PA14_27600,PA14_23580,NA	2395474..2395493,2053494..2053513,2053203..2053222	yes	TATGAGGACGAATCTCCCGCTTATA	TAGTTGGTGGGTTTCCCTACCGTGT	GGTCTCG	tata	TCCTAGGCCACTAGACGAAG	gttt	tgagacc	GGTACAGTAAGTGAGAATCCTCTCT	GGTCTTGACAAACGTGTGCTTGTAC
PA14_23590	2053742..2053761	yes	TATGAGGACGAATCTCCCGCTTATA	TAGTTGGTGGGTTTCCCTACCGTGT	GGTCTCG	tata	GAGGATGCGGGCACGGGTCT	gttt	tgagacc	GGTACAGTAAGTGAGAATCCTCTCT	GGTCTTGACAAACGTGTGCTTGTAC
PA14_23610	2054288..2054307	yes	TATGAGGACGAATCTCCCGCTTATA	TAGTTGGTGGGTTTCCCTACCGTGT	GGTCTCG	tata	TGAAACCGCGAATCCAGGTC	gttt	tgagacc	GGTACAGTAAGTGAGAATCCTCTCT	GGTCTTGACAAACGTGTGCTTGTAC
PA14_23620	2055259..2055278	yes	TATGAGGACGAATCTCCCGCTTATA	TAGTTGGTGGGTTTCCCTACCGTGT	GGTCTCG	tata	TGCAGCAGGACCCGATCCAG	gttt	tgagacc	GGTACAGTAAGTGAGAATCCTCTCT	GGTCTTGACAAACGTGTGCTTGTAC
PA14_23630	2055913..2055932	yes	TATGAGGACGAATCTCCCGCTTATA	TAGTTGGTGGGTTTCCCTACCGTGT	GGTCTCG	tata	GAGGTCGATCACGAACGGAT	gttt	tgagacc	GGTACAGTAAGTGAGAATCCTCTCT	GGTCTTGACAAACGTGTGCTTGTAC
PA14_23640	2056437..2056456	yes	TATGAGGACGAATCTCCCGCTTATA	TAGTTGGTGGGTTTCCCTACCGTGT	GGTCTCG	tata	CAGACCTTCCATCGGCGCCA	gttt	tgagacc	GGTACAGTAAGTGAGAATCCTCTCT	GGTCTTGACAAACGTGTGCTTGTAC
PA14_23650	2058100..2058119	yes	TATGAGGACGAATCTCCCGCTTATA	TAGTTGGTGGGTTTCCCTACCGTGT	GGTCTCG	tata	GCCGATGCCGCGGCTGGCTC	gttt	tgagacc	GGTACAGTAAGTGAGAATCCTCTCT	GGTCTTGACAAACGTGTGCTTGTAC
PA14_23670	2058928..2058947	yes	TATGAGGACGAATCTCCCGCTTATA	TAGTTGGTGGGTTTCCCTACCGTGT	GGTCTCG	tata	GATCGCGGCAGGGGAAGGTC	gttt	tgagacc	GGTACAGTAAGTGAGAATCCTCTCT	GGTCTTGACAAACGTGTGCTTGTAC
PA14_23680	2059141..2059160	yes	TATGAGGACGAATCTCCCGCTTATA	TAGTTGGTGGGTTTCCCTACCGTGT	GGTCTCG	tata	ATGACGGAACAGCGGGGCGA	gttt	tgagacc	GGTACAGTAAGTGAGAATCCTCTCT	GGTCTTGACAAACGTGTGCTTGTAC
PA14_23690	2060912..2060931	yes	TATGAGGACGAATCTCCCGCTTATA	TAGTTGGTGGGTTTCCCTACCGTGT	GGTCTCG	tata	GCGGCGGGAAGTCTTTCGAT	gttt	tgagacc	GGTACAGTAAGTGAGAATCCTCTCT	GGTCTTGACAAACGTGTGCTTGTAC
PA14_23700	2061062..2061081	yes	TATGAGGACGAATCTCCCGCTTATA	TAGTTGGTGGGTTTCCCTACCGTGT	GGTCTCG	tata	GGAACGGTTGACTTCAAGCC	gttt	tgagacc	GGTACAGTAAGTGAGAATCCTCTCT	GGTCTTGACAAACGTGTGCTTGTAC
PA14_23720	2062063..2062082	yes	TATGAGGACGAATCTCCCGCTTATA	TAGTTGGTGGGTTTCCCTACCGTGT	GGTCTCG	tata	GCAGGCTGCTGGGGTAACGC	gttt	tgagacc	GGTACAGTAAGTGAGAATCCTCTCT	GGTCTTGACAAACGTGTGCTTGTAC
PA14_23730	2063382..2063401	yes	TATGAGGACGAATCTCCCGCTTATA	TAGTTGGTGGGTTTCCCTACCGTGT	GGTCTCG	tata	TGAAGGTGTTGAGGCTGTTC	gttt	tgagacc	GGTACAGTAAGTGAGAATCCTCTCT	GGTCTTGACAAACGTGTGCTTGTAC
PA14_23750	2063579..2063598	yes	TATGAGGACGAATCTCCCGCTTATA	TAGTTGGTGGGTTTCCCTACCGTGT	GGTCTCG	tata	TTTGTCGTAGAGGGTCTTGC	gttt	tgagacc	GGTACAGTAAGTGAGAATCCTCTCT	GGTCTTGACAAACGTGTGCTTGTAC
PA14_23760	2065017..2065036	yes	TATGAGGACGAATCTCCCGCTTATA	TAGTTGGTGGGTTTCCCTACCGTGT	GGTCTCG	tata	AGACCGGTCGTCTGGGTATA	gttt	tgagacc	GGTACAGTAAGTGAGAATCCTCTCT	GGTCTTGACAAACGTGTGCTTGTAC
PA14_23770	2065926..2065945	yes	TATGAGGACGAATCTCCCGCTTATA	TAGTTGGTGGGTTTCCCTACCGTGT	GGTCTCG	tata	CATCTCGGCGGAAAGATCGT	gttt	tgagacc	GGTACAGTAAGTGAGAATCCTCTCT	GGTCTTGACAAACGTGTGCTTGTAC
PA14_23790	2066564..2066583	yes	TATGAGGACGAATCTCCCGCTTATA	TAGTTGGTGGGTTTCCCTACCGTGT	GGTCTCG	tata	CCGGACCGATACCGTCACCG	gttt	tgagacc	GGTACAGTAAGTGAGAATCCTCTCT	GGTCTTGACAAACGTGTGCTTGTAC
PA14_23800	2067736..2067755	yes	TATGAGGACGAATCTCCCGCTTATA	TAGTTGGTGGGTTTCCCTACCGTGT	GGTCTCG	tata	CAGCATCCGCTGCATGAGTA	gttt	tgagacc	GGTACAGTAAGTGAGAATCCTCTCT	GGTCTTGACAAACGTGTGCTTGTAC
PA14_23810	2068911..2068930	yes	TATGAGGACGAATCTCCCGCTTATA	TAGTTGGTGGGTTTCCCTACCGTGT	GGTCTCG	tata	GACTGCGACATTGAGGGGCT	gttt	tgagacc	GGTACAGTAAGTGAGAATCCTCTCT	GGTCTTGACAAACGTGTGCTTGTAC
PA14_23830	2070126..2070145	yes	TATGAGGACGAATCTCCCGCTTATA	TAGTTGGTGGGTTTCCCTACCGTGT	GGTCTCG	tata	CATGCCGGAAGTCAGGACCG	gttt	tgagacc	GGTACAGTAAGTGAGAATCCTCTCT	GGTCTTGACAAACGTGTGCTTGTAC
PA14_23840	2072897..2072916	yes	TATGAGGACGAATCTCCCGCTTATA	TAGTTGGTGGGTTTCCCTACCGTGT	GGTCTCG	tata	GCCGATTCGGCTGCCGCTGG	gttt	tgagacc	GGTACAGTAAGTGAGAATCCTCTCT	GGTCTTGACAAACGTGTGCTTGTAC
PA14_23850	2073831..2073850	yes	TATGAGGACGAATCTCCCGCTTATA	TAGTTGGTGGGTTTCCCTACCGTGT	GGTCTCG	tata	CAGATCTTGATGCGAACGGC	gttt	tgagacc	GGTACAGTAAGTGAGAATCCTCTCT	GGTCTTGACAAACGTGTGCTTGTAC
PA14_23860	2074761..2074780	yes	TATGAGGACGAATCTCCCGCTTATA	TAGTTGGTGGGTTTCCCTACCGTGT	GGTCTCG	tata	ACTCGGAACGCATGATGGAA	gttt	tgagacc	GGTACAGTAAGTGAGAATCCTCTCT	GGTCTTGACAAACGTGTGCTTGTAC
PA14_23880	2075606..2075625	yes	TATGAGGACGAATCTCCCGCTTATA	TAGTTGGTGGGTTTCCCTACCGTGT	GGTCTCG	tata	GCCAATCGGCCAGGGAACGC	gttt	tgagacc	GGTACAGTAAGTGAGAATCCTCTCT	GGTCTTGACAAACGTGTGCTTGTAC
PA14_23890	2076898..2076917	yes	TATGAGGACGAATCTCCCGCTTATA	TAGTTGGTGGGTTTCCCTACCGTGT	GGTCTCG	tata	CTTCAGCCCTCTTTCCAGCA	gttt	tgagacc	GGTACAGTAAGTGAGAATCCTCTCT	GGTCTTGACAAACGTGTGCTTGTAC
PA14_23900	2077625..2077644	yes	TATGAGGACGAATCTCCCGCTTATA	TAGTTGGTGGGTTTCCCTACCGTGT	GGTCTCG	tata	GACCATCGTCCAATCGACCC	gttt	tgagacc	GGTACAGTAAGTGAGAATCCTCTCT	GGTCTTGACAAACGTGTGCTTGTAC
PA14_23920	2078443..2078462	yes	TATGAGGACGAATCTCCCGCTTATA	TAGTTGGTGGGTTTCCCTACCGTGT	GGTCTCG	tata	CTGGCCGCGATGTTGGAGGA	gttt	tgagacc	GGTACAGTAAGTGAGAATCCTCTCT	GGTCTTGACAAACGTGTGCTTGTAC
PA14_23930	2079920..2079939	yes	TATGAGGACGAATCTCCCGCTTATA	TAGTTGGTGGGTTTCCCTACCGTGT	GGTCTCG	tata	CAGGTCGCTGTCGAGACGCC	gttt	tgagacc	GGTACAGTAAGTGAGAATCCTCTCT	GGTCTTGACAAACGTGTGCTTGTAC
PA14_23950	2081118..2081137	yes	TATGAGGACGAATCTCCCGCTTATA	TAGTTGGTGGGTTTCCCTACCGTGT	GGTCTCG	tata	TTGCCGTTGCCTCGCAGGTT	gttt	tgagacc	GGTACAGTAAGTGAGAATCCTCTCT	GGTCTTGACAAACGTGTGCTTGTAC
PA14_23970	2083910..2083929	yes	TATGAGGACGAATCTCCCGCTTATA	TAGTTGGTGGGTTTCCCTACCGTGT	GGTCTCG	tata	CAGGGCGCGGAGCAAAGGTT	gttt	tgagacc	GGTACAGTAAGTGAGAATCCTCTCT	GGTCTTGACAAACGTGTGCTTGTAC
PA14_23980	2084621..2084640	yes	TATGAGGACGAATCTCCCGCTTATA	TAGTTGGTGGGTTTCCCTACCGTGT	GGTCTCG	tata	TTATGTCTGAAGATCGCCGA	gttt	tgagacc	GGTACAGTAAGTGAGAATCCTCTCT	GGTCTTGACAAACGTGTGCTTGTAC
PA14_23990	2084881..2084900	yes	TATGAGGACGAATCTCCCGCTTATA	TAGTTGGTGGGTTTCCCTACCGTGT	GGTCTCG	tata	CGCGGCGATGTCGGGTAATG	gttt	tgagacc	GGTACAGTAAGTGAGAATCCTCTCT	GGTCTTGACAAACGTGTGCTTGTAC
PA14_24010	2086386..2086405	yes	TATGAGGACGAATCTCCCGCTTATA	TAGTTGGTGGGTTTCCCTACCGTGT	GGTCTCG	tata	GTCGAGGGCGAGGTATTCGA	gttt	tgagacc	GGTACAGTAAGTGAGAATCCTCTCT	GGTCTTGACAAACGTGTGCTTGTAC
PA14_24020	2087612..2087631	yes	TATGAGGACGAATCTCCCGCTTATA	TAGTTGGTGGGTTTCCCTACCGTGT	GGTCTCG	tata	GTTGGCGACGCTGCAATGGG	gttt	tgagacc	GGTACAGTAAGTGAGAATCCTCTCT	GGTCTTGACAAACGTGTGCTTGTAC
PA14_24040	2088076..2088095	yes	TATGAGGACGAATCTCCCGCTTATA	TAGTTGGTGGGTTTCCCTACCGTGT	GGTCTCG	tata	CACCACCATCAGCTCGATGA	gttt	tgagacc	GGTACAGTAAGTGAGAATCCTCTCT	GGTCTTGACAAACGTGTGCTTGTAC
PA14_24050	2088591..2088610	yes	TATGAGGACGAATCTCCCGCTTATA	TAGTTGGTGGGTTTCCCTACCGTGT	GGTCTCG	tata	GGCCACCAGCACTTCCAGCA	gttt	tgagacc	GGTACAGTAAGTGAGAATCCTCTCT	GGTCTTGACAAACGTGTGCTTGTAC
PA14_24060	2088977..2088996	yes	TATGAGGACGAATCTCCCGCTTATA	TAGTTGGTGGGTTTCCCTACCGTGT	GGTCTCG	tata	GGCGATCAGCAGCTCGAGCA	gttt	tgagacc	GGTACAGTAAGTGAGAATCCTCTCT	GGTCTTGACAAACGTGTGCTTGTAC
PA14_24070	2089726..2089745	yes	TATGAGGACGAATCTCCCGCTTATA	TAGTTGGTGGGTTTCCCTACCGTGT	GGTCTCG	tata	GATCAGCCCGGCGCAGACGA	gttt	tgagacc	GGTACAGTAAGTGAGAATCCTCTCT	GGTCTTGACAAACGTGTGCTTGTAC
PA14_24080	2090686..2090705	yes	TATGAGGACGAATCTCCCGCTTATA	TAGTTGGTGGGTTTCCCTACCGTGT	GGTCTCG	tata	CCGCCGTGCTGGCGGGCGGC	gttt	tgagacc	GGTACAGTAAGTGAGAATCCTCTCT	GGTCTTGACAAACGTGTGCTTGTAC
PA14_24100	2091833..2091852	yes	TATGAGGACGAATCTCCCGCTTATA	TAGTTGGTGGGTTTCCCTACCGTGT	GGTCTCG	tata	CCTGGGCCCTGAGGCGCTCG	gttt	tgagacc	GGTACAGTAAGTGAGAATCCTCTCT	GGTCTTGACAAACGTGTGCTTGTAC
PA14_24110,PA14_21800	2092506..2092525,1896365..1896384	no	TATGAGGACGAATCTCCCGCTTATA	TAGTTGGTGGGTTTCCCTACCGTGT	GGTCTCG	tata	CCGCCGACCCTCTGCTTGTA	gttt	tgagacc	GGTACAGTAAGTGAGAATCCTCTCT	GGTCTTGACAAACGTGTGCTTGTAC
PA14_41200,PA14_24130,PA14_24120,PA14_21810	3675545..3675564,2092786..2092805,2092595..2092614,1896454..1896473	no	TATGAGGACGAATCTCCCGCTTATA	TAGTTGGTGGGTTTCCCTACCGTGT	GGTCTCG	tata	CGACCCCCGGCGTGACAGGC	gttt	tgagacc	GGTACAGTAAGTGAGAATCCTCTCT	GGTCTTGACAAACGTGTGCTTGTAC
PA14_41200,PA14_24130,PA14_24120,PA14_21810	3675545..3675564,2092786..2092805,2092595..2092614,1896454..1896473	no	TATGAGGACGAATCTCCCGCTTATA	TAGTTGGTGGGTTTCCCTACCGTGT	GGTCTCG	tata	CGACCCCCGGCGTGACAGGC	gttt	tgagacc	GGTACAGTAAGTGAGAATCCTCTCT	GGTCTTGACAAACGTGTGCTTGTAC
PA14_24140	2094059..2094078	yes	TATGAGGACGAATCTCCCGCTTATA	TAGTTGGTGGGTTTCCCTACCGTGT	GGTCTCG	tata	CAGTGCTGCGGGCTCGACGC	gttt	tgagacc	GGTACAGTAAGTGAGAATCCTCTCT	GGTCTTGACAAACGTGTGCTTGTAC
PA14_24150	2095233..2095252	yes	TATGAGGACGAATCTCCCGCTTATA	TAGTTGGTGGGTTTCCCTACCGTGT	GGTCTCG	tata	CGAAGAGGGTGATGAGGATC	gttt	tgagacc	GGTACAGTAAGTGAGAATCCTCTCT	GGTCTTGACAAACGTGTGCTTGTAC
PA14_24170	2095494..2095513	yes	TATGAGGACGAATCTCCCGCTTATA	TAGTTGGTGGGTTTCCCTACCGTGT	GGTCTCG	tata	GTGCGGATAGGGAACGGCGG	gttt	tgagacc	GGTACAGTAAGTGAGAATCCTCTCT	GGTCTTGACAAACGTGTGCTTGTAC
PA14_24180	2097873..2097892	yes	TATGAGGACGAATCTCCCGCTTATA	TAGTTGGTGGGTTTCCCTACCGTGT	GGTCTCG	tata	CCCTCGAACGCCTGGCGAGG	gttt	tgagacc	GGTACAGTAAGTGAGAATCCTCTCT	GGTCTTGACAAACGTGTGCTTGTAC
PA14_24190	2099313..2099332	yes	TATGAGGACGAATCTCCCGCTTATA	TAGTTGGTGGGTTTCCCTACCGTGT	GGTCTCG	tata	TGCGGTGACCAGTGGGGAAA	gttt	tgagacc	GGTACAGTAAGTGAGAATCCTCTCT	GGTCTTGACAAACGTGTGCTTGTAC
PA14_24210	2101170..2101189	yes	TATGAGGACGAATCTCCCGCTTATA	TAGTTGGTGGGTTTCCCTACCGTGT	GGTCTCG	tata	GCGCAATTCGTCGAGCAGTT	gttt	tgagacc	GGTACAGTAAGTGAGAATCCTCTCT	GGTCTTGACAAACGTGTGCTTGTAC
PA14_24220	2101339..2101358	yes	TATGAGGACGAATCTCCCGCTTATA	TAGTTGGTGGGTTTCCCTACCGTGT	GGTCTCG	tata	ATGATGCCGATATTGCGAAA	gttt	tgagacc	GGTACAGTAAGTGAGAATCCTCTCT	GGTCTTGACAAACGTGTGCTTGTAC
PA14_24230	2102231..2102250	yes	TATGAGGACGAATCTCCCGCTTATA	TAGTTGGTGGGTTTCCCTACCGTGT	GGTCTCG	tata	TCAGGTCGTAGCCACGTCCG	gttt	tgagacc	GGTACAGTAAGTGAGAATCCTCTCT	GGTCTTGACAAACGTGTGCTTGTAC
PA14_24240	2103214..2103233	yes	TATGAGGACGAATCTCCCGCTTATA	TAGTTGGTGGGTTTCCCTACCGTGT	GGTCTCG	tata	CGACCGACAGGGGAAACTTC	gttt	tgagacc	GGTACAGTAAGTGAGAATCCTCTCT	GGTCTTGACAAACGTGTGCTTGTAC
PA14_24245	2104148..2104167	yes	TATGAGGACGAATCTCCCGCTTATA	TAGTTGGTGGGTTTCCCTACCGTGT	GGTCTCG	tata	GTTCTCGATCGCTTGGTTGA	gttt	tgagacc	GGTACAGTAAGTGAGAATCCTCTCT	GGTCTTGACAAACGTGTGCTTGTAC
PA14_24260	2104448..2104467	yes	TATGAGGACGAATCTCCCGCTTATA	TAGTTGGTGGGTTTCCCTACCGTGT	GGTCTCG	tata	GCACGGGAGCATTGCTTTCC	gttt	tgagacc	GGTACAGTAAGTGAGAATCCTCTCT	GGTCTTGACAAACGTGTGCTTGTAC
PA14_24270	2105263..2105282	yes	TATGAGGACGAATCTCCCGCTTATA	TAGTTGGTGGGTTTCCCTACCGTGT	GGTCTCG	tata	GTGGATGACTTTCGGTTGCT	gttt	tgagacc	GGTACAGTAAGTGAGAATCCTCTCT	GGTCTTGACAAACGTGTGCTTGTAC
PA14_24290	2108368..2108387	yes	TATGAGGACGAATCTCCCGCTTATA	TAGTTGGTGGGTTTCCCTACCGTGT	GGTCTCG	tata	GCAGCCGGGGCTGGCGGTTG	gttt	tgagacc	GGTACAGTAAGTGAGAATCCTCTCT	GGTCTTGACAAACGTGTGCTTGTAC
PA14_24300	2110414..2110433	yes	TATGAGGACGAATCTCCCGCTTATA	TAGTTGGTGGGTTTCCCTACCGTGT	GGTCTCG	tata	GCTGCCCAGTGCCAGCGCCA	gttt	tgagacc	GGTACAGTAAGTGAGAATCCTCTCT	GGTCTTGACAAACGTGTGCTTGTAC
PA14_24310	2111939..2111958	yes	TATGAGGACGAATCTCCCGCTTATA	TAGTTGGTGGGTTTCCCTACCGTGT	GGTCTCG	tata	GGCGAAGTGCGCCACGTCAT	gttt	tgagacc	GGTACAGTAAGTGAGAATCCTCTCT	GGTCTTGACAAACGTGTGCTTGTAC
PA14_24330	2113046..2113065	yes	TATGAGGACGAATCTCCCGCTTATA	TAGTTGGTGGGTTTCCCTACCGTGT	GGTCTCG	tata	GTTTTGCTGATGCTGGTTCA	gttt	tgagacc	GGTACAGTAAGTGAGAATCCTCTCT	GGTCTTGACAAACGTGTGCTTGTAC
PA14_24340	2116751..2116770	yes	TATGAGGACGAATCTCCCGCTTATA	TAGTTGGTGGGTTTCCCTACCGTGT	GGTCTCG	tata	CGACGATGGGGATCAGGCTC	gttt	tgagacc	GGTACAGTAAGTGAGAATCCTCTCT	GGTCTTGACAAACGTGTGCTTGTAC
PA14_24350	2117422..2117441	yes	TATGAGGACGAATCTCCCGCTTATA	TAGTTGGTGGGTTTCCCTACCGTGT	GGTCTCG	tata	TGTCTTCGACGACGAGTACG	gttt	tgagacc	GGTACAGTAAGTGAGAATCCTCTCT	GGTCTTGACAAACGTGTGCTTGTAC
PA14_24360	2117836..2117855	yes	TATGAGGACGAATCTCCCGCTTATA	TAGTTGGTGGGTTTCCCTACCGTGT	GGTCTCG	tata	AGCGATAGCGAAACGCCCAG	gttt	tgagacc	GGTACAGTAAGTGAGAATCCTCTCT	GGTCTTGACAAACGTGTGCTTGTAC
PA14_24370	2121756..2121775	yes	TATGAGGACGAATCTCCCGCTTATA	TAGTTGGTGGGTTTCCCTACCGTGT	GGTCTCG	tata	ACAGGACGAGGTACAGGGTA	gttt	tgagacc	GGTACAGTAAGTGAGAATCCTCTCT	GGTCTTGACAAACGTGTGCTTGTAC
PA14_24380	2123444..2123463	yes	TATGAGGACGAATCTCCCGCTTATA	TAGTTGGTGGGTTTCCCTACCGTGT	GGTCTCG	tata	GAAGCAGGCTGCAGAACAGG	gttt	tgagacc	GGTACAGTAAGTGAGAATCCTCTCT	GGTCTTGACAAACGTGTGCTTGTAC
PA14_24390	2125201..2125220	no	TATGAGGACGAATCTCCCGCTTATA	TAGTTGGTGGGTTTCCCTACCGTGT	GGTCTCG	tata	GCGGCCAGGCGTCCAGCAAC	gttt	tgagacc	GGTACAGTAAGTGAGAATCCTCTCT	GGTCTTGACAAACGTGTGCTTGTAC
PA14_24400	2126212..2126231	no	TATGAGGACGAATCTCCCGCTTATA	TAGTTGGTGGGTTTCCCTACCGTGT	GGTCTCG	tata	GAGGGCGAAGACCCAGGGCC	gttt	tgagacc	GGTACAGTAAGTGAGAATCCTCTCT	GGTCTTGACAAACGTGTGCTTGTAC
PA14_24410	2126706..2126725	yes	TATGAGGACGAATCTCCCGCTTATA	TAGTTGGTGGGTTTCCCTACCGTGT	GGTCTCG	tata	AGCGGTTCCAGCCGGTCGAG	gttt	tgagacc	GGTACAGTAAGTGAGAATCCTCTCT	GGTCTTGACAAACGTGTGCTTGTAC
PA14_24420	2127637..2127656	yes	TATGAGGACGAATCTCCCGCTTATA	TAGTTGGTGGGTTTCCCTACCGTGT	GGTCTCG	tata	GCCCAGTTCGACGCCCGGGG	gttt	tgagacc	GGTACAGTAAGTGAGAATCCTCTCT	GGTCTTGACAAACGTGTGCTTGTAC
PA14_24430	2128626..2128645	yes	TATGAGGACGAATCTCCCGCTTATA	TAGTTGGTGGGTTTCCCTACCGTGT	GGTCTCG	tata	CTCTTGTGCTGCGTGCTTTC	gttt	tgagacc	GGTACAGTAAGTGAGAATCCTCTCT	GGTCTTGACAAACGTGTGCTTGTAC
PA14_24440	2129163..2129182	yes	TATGAGGACGAATCTCCCGCTTATA	TAGTTGGTGGGTTTCCCTACCGTGT	GGTCTCG	tata	ATCGGTCTGGAGGAATTCGC	gttt	tgagacc	GGTACAGTAAGTGAGAATCCTCTCT	GGTCTTGACAAACGTGTGCTTGTAC
PA14_24445	2130060..2130079	yes	TATGAGGACGAATCTCCCGCTTATA	TAGTTGGTGGGTTTCCCTACCGTGT	GGTCTCG	tata	GAAATCGGCTTTGCTGGCCG	gttt	tgagacc	GGTACAGTAAGTGAGAATCCTCTCT	GGTCTTGACAAACGTGTGCTTGTAC
PA14_24480	2135496..2135515	yes	TATGAGGACGAATCTCCCGCTTATA	TAGTTGGTGGGTTTCCCTACCGTGT	GGTCTCG	tata	GCAGGACGGCAGACGCAGCA	gttt	tgagacc	GGTACAGTAAGTGAGAATCCTCTCT	GGTCTTGACAAACGTGTGCTTGTAC
PA14_24480,PA14_24490	2138299..2138318	yes	TATGAGGACGAATCTCCCGCTTATA	TAGTTGGTGGGTTTCCCTACCGTGT	GGTCTCG	tata	CTTGTCAGCGGCAGACGAGT	gttt	tgagacc	GGTACAGTAAGTGAGAATCCTCTCT	GGTCTTGACAAACGTGTGCTTGTAC
PA14_24500	2141923..2141942	yes	TATGAGGACGAATCTCCCGCTTATA	TAGTTGGTGGGTTTCCCTACCGTGT	GGTCTCG	tata	CGCGAGAGCCAGGCAGCGGA	gttt	tgagacc	GGTACAGTAAGTGAGAATCCTCTCT	GGTCTTGACAAACGTGTGCTTGTAC
PA14_24510	2142444..2142463	yes	TATGAGGACGAATCTCCCGCTTATA	TAGTTGGTGGGTTTCCCTACCGTGT	GGTCTCG	tata	GAGGGTGAAATCCTTGTGCG	gttt	tgagacc	GGTACAGTAAGTGAGAATCCTCTCT	GGTCTTGACAAACGTGTGCTTGTAC
PA14_24530	2143813..2143832	yes	TATGAGGACGAATCTCCCGCTTATA	TAGTTGGTGGGTTTCCCTACCGTGT	GGTCTCG	tata	ACTGCTCAGCTCGAACAGGA	gttt	tgagacc	GGTACAGTAAGTGAGAATCCTCTCT	GGTCTTGACAAACGTGTGCTTGTAC
PA14_24550	2144775..2144794	yes	TATGAGGACGAATCTCCCGCTTATA	TAGTTGGTGGGTTTCCCTACCGTGT	GGTCTCG	tata	CGCCGTCGGAGCGGTGTGTT	gttt	tgagacc	GGTACAGTAAGTGAGAATCCTCTCT	GGTCTTGACAAACGTGTGCTTGTAC
PA14_24560	2146300..2146319	yes	TATGAGGACGAATCTCCCGCTTATA	TAGTTGGTGGGTTTCCCTACCGTGT	GGTCTCG	tata	CCGCAGTTCGAAGCCGATGC	gttt	tgagacc	GGTACAGTAAGTGAGAATCCTCTCT	GGTCTTGACAAACGTGTGCTTGTAC
PA14_24570	2147895..2147914	yes	TATGAGGACGAATCTCCCGCTTATA	TAGTTGGTGGGTTTCCCTACCGTGT	GGTCTCG	tata	ATTCGGCGAAACCCTCTTGG	gttt	tgagacc	GGTACAGTAAGTGAGAATCCTCTCT	GGTCTTGACAAACGTGTGCTTGTAC
PA14_24580	2148109..2148128	yes	TATGAGGACGAATCTCCCGCTTATA	TAGTTGGTGGGTTTCCCTACCGTGT	GGTCTCG	tata	CAAGCCCATCAGCTCGCGCA	gttt	tgagacc	GGTACAGTAAGTGAGAATCCTCTCT	GGTCTTGACAAACGTGTGCTTGTAC
PA14_24590	2148603..2148622	yes	TATGAGGACGAATCTCCCGCTTATA	TAGTTGGTGGGTTTCCCTACCGTGT	GGTCTCG	tata	GGCGCTCGCCGGCGCGAAAC	gttt	tgagacc	GGTACAGTAAGTGAGAATCCTCTCT	GGTCTTGACAAACGTGTGCTTGTAC
PA14_24600	2151044..2151063	yes	TATGAGGACGAATCTCCCGCTTATA	TAGTTGGTGGGTTTCCCTACCGTGT	GGTCTCG	tata	GTAGCGAACGGGGTTGGCAA	gttt	tgagacc	GGTACAGTAAGTGAGAATCCTCTCT	GGTCTTGACAAACGTGTGCTTGTAC
PA14_24610	2152214..2152233	yes	TATGAGGACGAATCTCCCGCTTATA	TAGTTGGTGGGTTTCCCTACCGTGT	GGTCTCG	tata	ACAGAGACTGAGGCGGGGTA	gttt	tgagacc	GGTACAGTAAGTGAGAATCCTCTCT	GGTCTTGACAAACGTGTGCTTGTAC
PA14_24620	2153262..2153281	yes	TATGAGGACGAATCTCCCGCTTATA	TAGTTGGTGGGTTTCCCTACCGTGT	GGTCTCG	tata	GTCCATTGAAGCACAGGTTC	gttt	tgagacc	GGTACAGTAAGTGAGAATCCTCTCT	GGTCTTGACAAACGTGTGCTTGTAC
PA14_24630	2153300..2153319	yes	TATGAGGACGAATCTCCCGCTTATA	TAGTTGGTGGGTTTCCCTACCGTGT	GGTCTCG	tata	ACAGCTTGCCACAAACCACG	gttt	tgagacc	GGTACAGTAAGTGAGAATCCTCTCT	GGTCTTGACAAACGTGTGCTTGTAC
PA14_24640	2153634..2153653	yes	TATGAGGACGAATCTCCCGCTTATA	TAGTTGGTGGGTTTCCCTACCGTGT	GGTCTCG	tata	GAACAGCAGCTGGCGGGCCA	gttt	tgagacc	GGTACAGTAAGTGAGAATCCTCTCT	GGTCTTGACAAACGTGTGCTTGTAC
PA14_24650	2154909..2154928	yes	TATGAGGACGAATCTCCCGCTTATA	TAGTTGGTGGGTTTCCCTACCGTGT	GGTCTCG	tata	CGCAAGAAGGCTCTTTCCAA	gttt	tgagacc	GGTACAGTAAGTGAGAATCCTCTCT	GGTCTTGACAAACGTGTGCTTGTAC
PA14_24665	2155449..2155468	yes	TATGAGGACGAATCTCCCGCTTATA	TAGTTGGTGGGTTTCCCTACCGTGT	GGTCTCG	tata	GCAGGCTTTCCAGGCCTTTC	gttt	tgagacc	GGTACAGTAAGTGAGAATCCTCTCT	GGTCTTGACAAACGTGTGCTTGTAC
PA14_24675	2156569..2156588	yes	TATGAGGACGAATCTCCCGCTTATA	TAGTTGGTGGGTTTCCCTACCGTGT	GGTCTCG	tata	CGAACTGGCGCGGCTCGACC	gttt	tgagacc	GGTACAGTAAGTGAGAATCCTCTCT	GGTCTTGACAAACGTGTGCTTGTAC
PA14_24690	2159045..2159064	yes	TATGAGGACGAATCTCCCGCTTATA	TAGTTGGTGGGTTTCCCTACCGTGT	GGTCTCG	tata	GAAAGGCAGGAGCGTGGCGA	gttt	tgagacc	GGTACAGTAAGTGAGAATCCTCTCT	GGTCTTGACAAACGTGTGCTTGTAC
PA14_24700	2159422..2159441	yes	TATGAGGACGAATCTCCCGCTTATA	TAGTTGGTGGGTTTCCCTACCGTGT	GGTCTCG	tata	CAATTTCTTGCGCAGGCGGC	gttt	tgagacc	GGTACAGTAAGTGAGAATCCTCTCT	GGTCTTGACAAACGTGTGCTTGTAC
PA14_24710	2160182..2160201	yes	TATGAGGACGAATCTCCCGCTTATA	TAGTTGGTGGGTTTCCCTACCGTGT	GGTCTCG	tata	GATCGTCGACTATCAGGATA	gttt	tgagacc	GGTACAGTAAGTGAGAATCCTCTCT	GGTCTTGACAAACGTGTGCTTGTAC
PA14_24720	2160822..2160841	yes	TATGAGGACGAATCTCCCGCTTATA	TAGTTGGTGGGTTTCCCTACCGTGT	GGTCTCG	tata	GCATGCACGCACTGCGTTTC	gttt	tgagacc	GGTACAGTAAGTGAGAATCCTCTCT	GGTCTTGACAAACGTGTGCTTGTAC
PA14_24730	2164343..2164362	yes	TATGAGGACGAATCTCCCGCTTATA	TAGTTGGTGGGTTTCCCTACCGTGT	GGTCTCG	tata	GAGCCGTTCGCGGGTGAGCA	gttt	tgagacc	GGTACAGTAAGTGAGAATCCTCTCT	GGTCTTGACAAACGTGTGCTTGTAC
PA14_24740	2164791..2164810	yes	TATGAGGACGAATCTCCCGCTTATA	TAGTTGGTGGGTTTCCCTACCGTGT	GGTCTCG	tata	CGGTCGCGTTCACCGGTAGT	gttt	tgagacc	GGTACAGTAAGTGAGAATCCTCTCT	GGTCTTGACAAACGTGTGCTTGTAC
PA14_24760	2165173..2165192	yes	TATGAGGACGAATCTCCCGCTTATA	TAGTTGGTGGGTTTCCCTACCGTGT	GGTCTCG	tata	GGGAGGGGCGGCCGTCCGCC	gttt	tgagacc	GGTACAGTAAGTGAGAATCCTCTCT	GGTCTTGACAAACGTGTGCTTGTAC
PA14_24770	2165520..2165539	yes	TATGAGGACGAATCTCCCGCTTATA	TAGTTGGTGGGTTTCCCTACCGTGT	GGTCTCG	tata	GCGTTTGCAGTGGTCTTGCG	gttt	tgagacc	GGTACAGTAAGTGAGAATCCTCTCT	GGTCTTGACAAACGTGTGCTTGTAC
PA14_24780	2165862..2165881	yes	TATGAGGACGAATCTCCCGCTTATA	TAGTTGGTGGGTTTCCCTACCGTGT	GGTCTCG	tata	GAGGCAGCATGGAAAGCTCT	gttt	tgagacc	GGTACAGTAAGTGAGAATCCTCTCT	GGTCTTGACAAACGTGTGCTTGTAC
PA14_24790	2168640..2168659	yes	TATGAGGACGAATCTCCCGCTTATA	TAGTTGGTGGGTTTCCCTACCGTGT	GGTCTCG	tata	AAGCCACGGCACGGGCGATC	gttt	tgagacc	GGTACAGTAAGTGAGAATCCTCTCT	GGTCTTGACAAACGTGTGCTTGTAC
PA14_24810	2169683..2169702	yes	TATGAGGACGAATCTCCCGCTTATA	TAGTTGGTGGGTTTCCCTACCGTGT	GGTCTCG	tata	GAGGCAAGGCGATACAGGAA	gttt	tgagacc	GGTACAGTAAGTGAGAATCCTCTCT	GGTCTTGACAAACGTGTGCTTGTAC
PA14_24820	2170613..2170632	yes	TATGAGGACGAATCTCCCGCTTATA	TAGTTGGTGGGTTTCCCTACCGTGT	GGTCTCG	tata	CGTGGAAGGGGCTCTGTTCC	gttt	tgagacc	GGTACAGTAAGTGAGAATCCTCTCT	GGTCTTGACAAACGTGTGCTTGTAC
PA14_24830	2171223..2171242	yes	TATGAGGACGAATCTCCCGCTTATA	TAGTTGGTGGGTTTCCCTACCGTGT	GGTCTCG	tata	TGCCGGAGAGATCCAGGTCA	gttt	tgagacc	GGTACAGTAAGTGAGAATCCTCTCT	GGTCTTGACAAACGTGTGCTTGTAC
PA14_24840	2171429..2171448	yes	TATGAGGACGAATCTCCCGCTTATA	TAGTTGGTGGGTTTCCCTACCGTGT	GGTCTCG	tata	GAGCAGTTGCTCGCGTTTGC	gttt	tgagacc	GGTACAGTAAGTGAGAATCCTCTCT	GGTCTTGACAAACGTGTGCTTGTAC
PA14_24850	2171992..2172011	yes	TATGAGGACGAATCTCCCGCTTATA	TAGTTGGTGGGTTTCCCTACCGTGT	GGTCTCG	tata	TGTGCAGTGTTTCGCGGCGA	gttt	tgagacc	GGTACAGTAAGTGAGAATCCTCTCT	GGTCTTGACAAACGTGTGCTTGTAC
PA14_24860	2172640..2172659	yes	TATGAGGACGAATCTCCCGCTTATA	TAGTTGGTGGGTTTCCCTACCGTGT	GGTCTCG	tata	AGGGCATGGCGCGTCCAGGC	gttt	tgagacc	GGTACAGTAAGTGAGAATCCTCTCT	GGTCTTGACAAACGTGTGCTTGTAC
PA14_24880	2174500..2174519	yes	TATGAGGACGAATCTCCCGCTTATA	TAGTTGGTGGGTTTCCCTACCGTGT	GGTCTCG	tata	CCTACGGCGAGGAGGAGGGC	gttt	tgagacc	GGTACAGTAAGTGAGAATCCTCTCT	GGTCTTGACAAACGTGTGCTTGTAC
PA14_24890	2175243..2175262	yes	TATGAGGACGAATCTCCCGCTTATA	TAGTTGGTGGGTTTCCCTACCGTGT	GGTCTCG	tata	CAGGGGGGCAGGGCGCTATC	gttt	tgagacc	GGTACAGTAAGTGAGAATCCTCTCT	GGTCTTGACAAACGTGTGCTTGTAC
PA14_24900	2175343..2175362	yes	TATGAGGACGAATCTCCCGCTTATA	TAGTTGGTGGGTTTCCCTACCGTGT	GGTCTCG	tata	CGAATGCCGTTTCGGCCTTG	gttt	tgagacc	GGTACAGTAAGTGAGAATCCTCTCT	GGTCTTGACAAACGTGTGCTTGTAC
PA14_24910	2175895..2175914	no	TATGAGGACGAATCTCCCGCTTATA	TAGTTGGTGGGTTTCCCTACCGTGT	GGTCTCG	tata	GTCTCGACCGGCATCAGCCC	gttt	tgagacc	GGTACAGTAAGTGAGAATCCTCTCT	GGTCTTGACAAACGTGTGCTTGTAC
PA14_24920	2178119..2178138	yes	TATGAGGACGAATCTCCCGCTTATA	TAGTTGGTGGGTTTCCCTACCGTGT	GGTCTCG	tata	CGGAACCGAGGTGGAGCCAA	gttt	tgagacc	GGTACAGTAAGTGAGAATCCTCTCT	GGTCTTGACAAACGTGTGCTTGTAC
PA14_24940	2178362..2178381	yes	TATGAGGACGAATCTCCCGCTTATA	TAGTTGGTGGGTTTCCCTACCGTGT	GGTCTCG	tata	GCTGTCCGGCAATTCGACCA	gttt	tgagacc	GGTACAGTAAGTGAGAATCCTCTCT	GGTCTTGACAAACGTGTGCTTGTAC
PA14_24950	2180152..2180171	yes	TATGAGGACGAATCTCCCGCTTATA	TAGTTGGTGGGTTTCCCTACCGTGT	GGTCTCG	tata	GGTCAGCCGCCACTGACCCT	gttt	tgagacc	GGTACAGTAAGTGAGAATCCTCTCT	GGTCTTGACAAACGTGTGCTTGTAC
PA14_24960	2181570..2181589	yes	TATGAGGACGAATCTCCCGCTTATA	TAGTTGGTGGGTTTCCCTACCGTGT	GGTCTCG	tata	CAGCAGGGCGCGCACGCTCT	gttt	tgagacc	GGTACAGTAAGTGAGAATCCTCTCT	GGTCTTGACAAACGTGTGCTTGTAC
PA14_24970	2183190..2183209	yes	TATGAGGACGAATCTCCCGCTTATA	TAGTTGGTGGGTTTCCCTACCGTGT	GGTCTCG	tata	TGCCCGCCTGCTTGCCATGC	gttt	tgagacc	GGTACAGTAAGTGAGAATCCTCTCT	GGTCTTGACAAACGTGTGCTTGTAC
PA14_24980	2184180..2184199	yes	TATGAGGACGAATCTCCCGCTTATA	TAGTTGGTGGGTTTCCCTACCGTGT	GGTCTCG	tata	AGCGGTACAGCGCGGAGAGA	gttt	tgagacc	GGTACAGTAAGTGAGAATCCTCTCT	GGTCTTGACAAACGTGTGCTTGTAC
PA14_24990	2185377..2185396	yes	TATGAGGACGAATCTCCCGCTTATA	TAGTTGGTGGGTTTCCCTACCGTGT	GGTCTCG	tata	GCGAGCAGGGCGGTAGCGAG	gttt	tgagacc	GGTACAGTAAGTGAGAATCCTCTCT	GGTCTTGACAAACGTGTGCTTGTAC
PA14_25000	2187360..2187379	yes	TATGAGGACGAATCTCCCGCTTATA	TAGTTGGTGGGTTTCCCTACCGTGT	GGTCTCG	tata	GACAGGAAACGAGAGTGAAC	gttt	tgagacc	GGTACAGTAAGTGAGAATCCTCTCT	GGTCTTGACAAACGTGTGCTTGTAC
PA14_25020	2187626..2187645	yes	TATGAGGACGAATCTCCCGCTTATA	TAGTTGGTGGGTTTCCCTACCGTGT	GGTCTCG	tata	TACATCGGTGAACTTGAGCA	gttt	tgagacc	GGTACAGTAAGTGAGAATCCTCTCT	GGTCTTGACAAACGTGTGCTTGTAC
PA14_25030	2189709..2189728	yes	TATGAGGACGAATCTCCCGCTTATA	TAGTTGGTGGGTTTCCCTACCGTGT	GGTCTCG	tata	GCTGGTCGTCCAGCGTGATG	gttt	tgagacc	GGTACAGTAAGTGAGAATCCTCTCT	GGTCTTGACAAACGTGTGCTTGTAC
PA14_25040	2190820..2190839	yes	TATGAGGACGAATCTCCCGCTTATA	TAGTTGGTGGGTTTCCCTACCGTGT	GGTCTCG	tata	GCGACCAGAATGTGTTGATA	gttt	tgagacc	GGTACAGTAAGTGAGAATCCTCTCT	GGTCTTGACAAACGTGTGCTTGTAC
PA14_25050	2191060..2191079	yes	TATGAGGACGAATCTCCCGCTTATA	TAGTTGGTGGGTTTCCCTACCGTGT	GGTCTCG	tata	CAGCAGGATCACCAGCCAAG	gttt	tgagacc	GGTACAGTAAGTGAGAATCCTCTCT	GGTCTTGACAAACGTGTGCTTGTAC
PA14_25060	2192288..2192307	yes	TATGAGGACGAATCTCCCGCTTATA	TAGTTGGTGGGTTTCCCTACCGTGT	GGTCTCG	tata	GTGAACGGACGGCAGATCAT	gttt	tgagacc	GGTACAGTAAGTGAGAATCCTCTCT	GGTCTTGACAAACGTGTGCTTGTAC
PA14_25080	2192761..2192780	yes	TATGAGGACGAATCTCCCGCTTATA	TAGTTGGTGGGTTTCCCTACCGTGT	GGTCTCG	tata	TAACCGTGATGGCTTTACCT	gttt	tgagacc	GGTACAGTAAGTGAGAATCCTCTCT	GGTCTTGACAAACGTGTGCTTGTAC
PA14_25090	2194936..2194955	yes	TATGAGGACGAATCTCCCGCTTATA	TAGTTGGTGGGTTTCCCTACCGTGT	GGTCTCG	tata	TGACGACGTCTCTCGGATTC	gttt	tgagacc	GGTACAGTAAGTGAGAATCCTCTCT	GGTCTTGACAAACGTGTGCTTGTAC
PA14_25100	2196195..2196214	yes	TATGAGGACGAATCTCCCGCTTATA	TAGTTGGTGGGTTTCCCTACCGTGT	GGTCTCG	tata	TAGGCAAACCCGCGCTCCCG	gttt	tgagacc	GGTACAGTAAGTGAGAATCCTCTCT	GGTCTTGACAAACGTGTGCTTGTAC
PA14_25110	2196683..2196702	yes	TATGAGGACGAATCTCCCGCTTATA	TAGTTGGTGGGTTTCCCTACCGTGT	GGTCTCG	tata	TGATGGTCTTGGCCTTGGCC	gttt	tgagacc	GGTACAGTAAGTGAGAATCCTCTCT	GGTCTTGACAAACGTGTGCTTGTAC
PA14_25130	2199371..2199390	no	TATGAGGACGAATCTCCCGCTTATA	TAGTTGGTGGGTTTCCCTACCGTGT	GGTCTCG	tata	GGTGCGGGTATAAAGCTCTT	gttt	tgagacc	GGTACAGTAAGTGAGAATCCTCTCT	GGTCTTGACAAACGTGTGCTTGTAC
PA14_25140	2200094..2200113	yes	TATGAGGACGAATCTCCCGCTTATA	TAGTTGGTGGGTTTCCCTACCGTGT	GGTCTCG	tata	ACGATTTCAAGGAAGGATGT	gttt	tgagacc	GGTACAGTAAGTGAGAATCCTCTCT	GGTCTTGACAAACGTGTGCTTGTAC
PA14_25150	2200799..2200818	yes	TATGAGGACGAATCTCCCGCTTATA	TAGTTGGTGGGTTTCCCTACCGTGT	GGTCTCG	tata	GGCGCTGGGCAGCGAGTGGG	gttt	tgagacc	GGTACAGTAAGTGAGAATCCTCTCT	GGTCTTGACAAACGTGTGCTTGTAC
PA14_25160	2201417..2201436	yes	TATGAGGACGAATCTCCCGCTTATA	TAGTTGGTGGGTTTCCCTACCGTGT	GGTCTCG	tata	GAGAGGATCTCGGCTTGGCG	gttt	tgagacc	GGTACAGTAAGTGAGAATCCTCTCT	GGTCTTGACAAACGTGTGCTTGTAC
PA14_25180	2201693..2201712	yes	TATGAGGACGAATCTCCCGCTTATA	TAGTTGGTGGGTTTCCCTACCGTGT	GGTCTCG	tata	GCGTTCGACGGTTTCCGACT	gttt	tgagacc	GGTACAGTAAGTGAGAATCCTCTCT	GGTCTTGACAAACGTGTGCTTGTAC
PA14_25195	2202626..2202645	yes	TATGAGGACGAATCTCCCGCTTATA	TAGTTGGTGGGTTTCCCTACCGTGT	GGTCTCG	tata	GCGGTCCTCGGCGGTCAGCC	gttt	tgagacc	GGTACAGTAAGTGAGAATCCTCTCT	GGTCTTGACAAACGTGTGCTTGTAC
PA14_25210	2203630..2203649	yes	TATGAGGACGAATCTCCCGCTTATA	TAGTTGGTGGGTTTCCCTACCGTGT	GGTCTCG	tata	CCCTTCCAGCTGGGTCAGGC	gttt	tgagacc	GGTACAGTAAGTGAGAATCCTCTCT	GGTCTTGACAAACGTGTGCTTGTAC
PA14_25220	2204979..2204998	yes	TATGAGGACGAATCTCCCGCTTATA	TAGTTGGTGGGTTTCCCTACCGTGT	GGTCTCG	tata	AGAGCAGCAGGGCAAGGCAA	gttt	tgagacc	GGTACAGTAAGTGAGAATCCTCTCT	GGTCTTGACAAACGTGTGCTTGTAC
PA14_25230	2208443..2208462	yes	TATGAGGACGAATCTCCCGCTTATA	TAGTTGGTGGGTTTCCCTACCGTGT	GGTCTCG	tata	CAGGCTGGGAAGACGCAGTA	gttt	tgagacc	GGTACAGTAAGTGAGAATCCTCTCT	GGTCTTGACAAACGTGTGCTTGTAC
PA14_25250	2208698..2208717	yes	TATGAGGACGAATCTCCCGCTTATA	TAGTTGGTGGGTTTCCCTACCGTGT	GGTCTCG	tata	GGTAGAGCTGGCCAATCAGC	gttt	tgagacc	GGTACAGTAAGTGAGAATCCTCTCT	GGTCTTGACAAACGTGTGCTTGTAC
PA14_25270	2210200..2210219	yes	TATGAGGACGAATCTCCCGCTTATA	TAGTTGGTGGGTTTCCCTACCGTGT	GGTCTCG	tata	GGCCACGCTTCAGCTCGCCC	gttt	tgagacc	GGTACAGTAAGTGAGAATCCTCTCT	GGTCTTGACAAACGTGTGCTTGTAC
PA14_25280	2211878..2211897	yes	TATGAGGACGAATCTCCCGCTTATA	TAGTTGGTGGGTTTCCCTACCGTGT	GGTCTCG	tata	TGTTCGGGGGCGCCGCTGAT	gttt	tgagacc	GGTACAGTAAGTGAGAATCCTCTCT	GGTCTTGACAAACGTGTGCTTGTAC
PA14_25305	2213203..2213222	yes	TATGAGGACGAATCTCCCGCTTATA	TAGTTGGTGGGTTTCCCTACCGTGT	GGTCTCG	tata	GATGCTCGACCTTGTCGAGC	gttt	tgagacc	GGTACAGTAAGTGAGAATCCTCTCT	GGTCTTGACAAACGTGTGCTTGTAC
PA14_25320	2214412..2214431	yes	TATGAGGACGAATCTCCCGCTTATA	TAGTTGGTGGGTTTCCCTACCGTGT	GGTCTCG	tata	GGCTACCAGCAGTGTGCGGG	gttt	tgagacc	GGTACAGTAAGTGAGAATCCTCTCT	GGTCTTGACAAACGTGTGCTTGTAC
PA14_25330	2215190..2215209	yes	TATGAGGACGAATCTCCCGCTTATA	TAGTTGGTGGGTTTCCCTACCGTGT	GGTCTCG	tata	AACAGGACTTCGCGGATCGT	gttt	tgagacc	GGTACAGTAAGTGAGAATCCTCTCT	GGTCTTGACAAACGTGTGCTTGTAC
PA14_25340	2215866..2215885	yes	TATGAGGACGAATCTCCCGCTTATA	TAGTTGGTGGGTTTCCCTACCGTGT	GGTCTCG	tata	CGAACACGGCCTTCACGAAC	gttt	tgagacc	GGTACAGTAAGTGAGAATCCTCTCT	GGTCTTGACAAACGTGTGCTTGTAC
PA14_25350	2216494..2216513	yes	TATGAGGACGAATCTCCCGCTTATA	TAGTTGGTGGGTTTCCCTACCGTGT	GGTCTCG	tata	GATGGCGGTGAACATGCCGA	gttt	tgagacc	GGTACAGTAAGTGAGAATCCTCTCT	GGTCTTGACAAACGTGTGCTTGTAC
PA14_25360	2217694..2217713	yes	TATGAGGACGAATCTCCCGCTTATA	TAGTTGGTGGGTTTCCCTACCGTGT	GGTCTCG	tata	GCCTTGGCAAGCGGACGGAA	gttt	tgagacc	GGTACAGTAAGTGAGAATCCTCTCT	GGTCTTGACAAACGTGTGCTTGTAC
PA14_25370	2218714..2218733	yes	TATGAGGACGAATCTCCCGCTTATA	TAGTTGGTGGGTTTCCCTACCGTGT	GGTCTCG	tata	GATGACGAAGACCAGTAGCC	gttt	tgagacc	GGTACAGTAAGTGAGAATCCTCTCT	GGTCTTGACAAACGTGTGCTTGTAC
PA14_25390	2219158..2219177	yes	TATGAGGACGAATCTCCCGCTTATA	TAGTTGGTGGGTTTCCCTACCGTGT	GGTCTCG	tata	ATCGCCGCCCCTTCGCCCGC	gttt	tgagacc	GGTACAGTAAGTGAGAATCCTCTCT	GGTCTTGACAAACGTGTGCTTGTAC
PA14_25400	2221222..2221241	yes	TATGAGGACGAATCTCCCGCTTATA	TAGTTGGTGGGTTTCCCTACCGTGT	GGTCTCG	tata	GTTTTCCGGCGCTTCGCCCT	gttt	tgagacc	GGTACAGTAAGTGAGAATCCTCTCT	GGTCTTGACAAACGTGTGCTTGTAC
PA14_25410	2221550..2221569	yes	TATGAGGACGAATCTCCCGCTTATA	TAGTTGGTGGGTTTCCCTACCGTGT	GGTCTCG	tata	GGGAGCACAGCAGTAGCGTA	gttt	tgagacc	GGTACAGTAAGTGAGAATCCTCTCT	GGTCTTGACAAACGTGTGCTTGTAC
PA14_25420	2222312..2222331	yes	TATGAGGACGAATCTCCCGCTTATA	TAGTTGGTGGGTTTCCCTACCGTGT	GGTCTCG	tata	CATCGGCACGCGCTATACGC	gttt	tgagacc	GGTACAGTAAGTGAGAATCCTCTCT	GGTCTTGACAAACGTGTGCTTGTAC
PA14_25430	2222301..2222320	yes	TATGAGGACGAATCTCCCGCTTATA	TAGTTGGTGGGTTTCCCTACCGTGT	GGTCTCG	tata	GTGCCGATGAAAACGGACAG	gttt	tgagacc	GGTACAGTAAGTGAGAATCCTCTCT	GGTCTTGACAAACGTGTGCTTGTAC
PA14_25440	2223561..2223580	yes	TATGAGGACGAATCTCCCGCTTATA	TAGTTGGTGGGTTTCCCTACCGTGT	GGTCTCG	tata	CGTAGCTCTTGCTCAGGTTG	gttt	tgagacc	GGTACAGTAAGTGAGAATCCTCTCT	GGTCTTGACAAACGTGTGCTTGTAC
PA14_25450	2224234..2224253	yes	TATGAGGACGAATCTCCCGCTTATA	TAGTTGGTGGGTTTCCCTACCGTGT	GGTCTCG	tata	GCCGGACGGGAGCGGACGGC	gttt	tgagacc	GGTACAGTAAGTGAGAATCCTCTCT	GGTCTTGACAAACGTGTGCTTGTAC
PA14_25470	2226125..2226144	yes	TATGAGGACGAATCTCCCGCTTATA	TAGTTGGTGGGTTTCCCTACCGTGT	GGTCTCG	tata	TAGCGCTTGAACAGGCGACG	gttt	tgagacc	GGTACAGTAAGTGAGAATCCTCTCT	GGTCTTGACAAACGTGTGCTTGTAC
PA14_25480	2226289..2226308	yes	TATGAGGACGAATCTCCCGCTTATA	TAGTTGGTGGGTTTCCCTACCGTGT	GGTCTCG	tata	CGGCGAGGGCTGGCAATCCC	gttt	tgagacc	GGTACAGTAAGTGAGAATCCTCTCT	GGTCTTGACAAACGTGTGCTTGTAC
PA14_25490	2228601..2228620	yes	TATGAGGACGAATCTCCCGCTTATA	TAGTTGGTGGGTTTCCCTACCGTGT	GGTCTCG	tata	CGGCAGCATCATCCAGCCGC	gttt	tgagacc	GGTACAGTAAGTGAGAATCCTCTCT	GGTCTTGACAAACGTGTGCTTGTAC
PA14_25500	2229222..2229241	yes	TATGAGGACGAATCTCCCGCTTATA	TAGTTGGTGGGTTTCCCTACCGTGT	GGTCTCG	tata	CGGCACCCGCCCGTCTGCGG	gttt	tgagacc	GGTACAGTAAGTGAGAATCCTCTCT	GGTCTTGACAAACGTGTGCTTGTAC
PA14_25510	2229664..2229683	yes	TATGAGGACGAATCTCCCGCTTATA	TAGTTGGTGGGTTTCCCTACCGTGT	GGTCTCG	tata	CCAGGCGGCGAGCAGTCGCT	gttt	tgagacc	GGTACAGTAAGTGAGAATCCTCTCT	GGTCTTGACAAACGTGTGCTTGTAC
PA14_25520	2230695..2230714	yes	TATGAGGACGAATCTCCCGCTTATA	TAGTTGGTGGGTTTCCCTACCGTGT	GGTCTCG	tata	CAAGAATATCGAGGAGTTTC	gttt	tgagacc	GGTACAGTAAGTGAGAATCCTCTCT	GGTCTTGACAAACGTGTGCTTGTAC
PA14_25530	2230880..2230899	yes	TATGAGGACGAATCTCCCGCTTATA	TAGTTGGTGGGTTTCCCTACCGTGT	GGTCTCG	tata	GAATGACGACAGTGAACGCC	gttt	tgagacc	GGTACAGTAAGTGAGAATCCTCTCT	GGTCTTGACAAACGTGTGCTTGTAC
PA14_25540	2231647..2231666	yes	TATGAGGACGAATCTCCCGCTTATA	TAGTTGGTGGGTTTCCCTACCGTGT	GGTCTCG	tata	TGTTGCCCAGGCAGACGAAC	gttt	tgagacc	GGTACAGTAAGTGAGAATCCTCTCT	GGTCTTGACAAACGTGTGCTTGTAC
PA14_25550	2232105..2232124	yes	TATGAGGACGAATCTCCCGCTTATA	TAGTTGGTGGGTTTCCCTACCGTGT	GGTCTCG	tata	AGCAATGCTCTTGCAGTTCC	gttt	tgagacc	GGTACAGTAAGTGAGAATCCTCTCT	GGTCTTGACAAACGTGTGCTTGTAC
PA14_25560	2236395..2236414	yes	TATGAGGACGAATCTCCCGCTTATA	TAGTTGGTGGGTTTCCCTACCGTGT	GGTCTCG	tata	AGTGCAACACGCAACTCCTC	gttt	tgagacc	GGTACAGTAAGTGAGAATCCTCTCT	GGTCTTGACAAACGTGTGCTTGTAC
PA14_25580	2237036..2237055	yes	TATGAGGACGAATCTCCCGCTTATA	TAGTTGGTGGGTTTCCCTACCGTGT	GGTCTCG	tata	ACACCGGTGGTCGGAGAGGC	gttt	tgagacc	GGTACAGTAAGTGAGAATCCTCTCT	GGTCTTGACAAACGTGTGCTTGTAC
PA14_25590	2238016..2238035	yes	TATGAGGACGAATCTCCCGCTTATA	TAGTTGGTGGGTTTCCCTACCGTGT	GGTCTCG	tata	GCGCGCGATCGAGTCGACCA	gttt	tgagacc	GGTACAGTAAGTGAGAATCCTCTCT	GGTCTTGACAAACGTGTGCTTGTAC
PA14_25600	2238688..2238707	yes	TATGAGGACGAATCTCCCGCTTATA	TAGTTGGTGGGTTTCCCTACCGTGT	GGTCTCG	tata	CTCTTGTCGTCATTCGCCTT	gttt	tgagacc	GGTACAGTAAGTGAGAATCCTCTCT	GGTCTTGACAAACGTGTGCTTGTAC
PA14_25610	2240274..2240293	yes	TATGAGGACGAATCTCCCGCTTATA	TAGTTGGTGGGTTTCCCTACCGTGT	GGTCTCG	tata	CTGGAGGCGAGGATCAGGTC	gttt	tgagacc	GGTACAGTAAGTGAGAATCCTCTCT	GGTCTTGACAAACGTGTGCTTGTAC
PA14_25620	2240424..2240443	yes	TATGAGGACGAATCTCCCGCTTATA	TAGTTGGTGGGTTTCCCTACCGTGT	GGTCTCG	tata	GGATCGATATGAGGTGGAAT	gttt	tgagacc	GGTACAGTAAGTGAGAATCCTCTCT	GGTCTTGACAAACGTGTGCTTGTAC
PA14_25630	2240993..2241012	yes	TATGAGGACGAATCTCCCGCTTATA	TAGTTGGTGGGTTTCCCTACCGTGT	GGTCTCG	tata	GGAACGACGCATGTCACGAG	gttt	tgagacc	GGTACAGTAAGTGAGAATCCTCTCT	GGTCTTGACAAACGTGTGCTTGTAC
PA14_25640	2241196..2241215	yes	TATGAGGACGAATCTCCCGCTTATA	TAGTTGGTGGGTTTCCCTACCGTGT	GGTCTCG	tata	GAGGCCGGAACAACGCAGTG	gttt	tgagacc	GGTACAGTAAGTGAGAATCCTCTCT	GGTCTTGACAAACGTGTGCTTGTAC
PA14_25650	2242274..2242293	yes	TATGAGGACGAATCTCCCGCTTATA	TAGTTGGTGGGTTTCCCTACCGTGT	GGTCTCG	tata	GCCGGGGAAGACGAATGCGA	gttt	tgagacc	GGTACAGTAAGTGAGAATCCTCTCT	GGTCTTGACAAACGTGTGCTTGTAC
PA14_25660	2243262..2243281	yes	TATGAGGACGAATCTCCCGCTTATA	TAGTTGGTGGGTTTCCCTACCGTGT	GGTCTCG	tata	CGCCTGGCCGATGCCACGGC	gttt	tgagacc	GGTACAGTAAGTGAGAATCCTCTCT	GGTCTTGACAAACGTGTGCTTGTAC
PA14_25670	2244171..2244190	yes	TATGAGGACGAATCTCCCGCTTATA	TAGTTGGTGGGTTTCCCTACCGTGT	GGTCTCG	tata	CTTCTTAACGCGTTCTTCGA	gttt	tgagacc	GGTACAGTAAGTGAGAATCCTCTCT	GGTCTTGACAAACGTGTGCTTGTAC
PA14_25690	2244582..2244601	yes	TATGAGGACGAATCTCCCGCTTATA	TAGTTGGTGGGTTTCCCTACCGTGT	GGTCTCG	tata	CCCAACTGCTCGGGACATCC	gttt	tgagacc	GGTACAGTAAGTGAGAATCCTCTCT	GGTCTTGACAAACGTGTGCTTGTAC
PA14_25710	2245804..2245823	yes	TATGAGGACGAATCTCCCGCTTATA	TAGTTGGTGGGTTTCCCTACCGTGT	GGTCTCG	tata	GCGATCGCGCACGGACAGCT	gttt	tgagacc	GGTACAGTAAGTGAGAATCCTCTCT	GGTCTTGACAAACGTGTGCTTGTAC
PA14_25730	2246641..2246660	yes	TATGAGGACGAATCTCCCGCTTATA	TAGTTGGTGGGTTTCCCTACCGTGT	GGTCTCG	tata	ATGCAGCCAGGCCGACGCAG	gttt	tgagacc	GGTACAGTAAGTGAGAATCCTCTCT	GGTCTTGACAAACGTGTGCTTGTAC
PA14_25740	2247676..2247695	yes	TATGAGGACGAATCTCCCGCTTATA	TAGTTGGTGGGTTTCCCTACCGTGT	GGTCTCG	tata	CTCCAGGGTGACGAACAGGC	gttt	tgagacc	GGTACAGTAAGTGAGAATCCTCTCT	GGTCTTGACAAACGTGTGCTTGTAC
PA14_25760	2248312..2248331	yes	TATGAGGACGAATCTCCCGCTTATA	TAGTTGGTGGGTTTCCCTACCGTGT	GGTCTCG	tata	CTCCAGAGCGCCTGCTGCCA	gttt	tgagacc	GGTACAGTAAGTGAGAATCCTCTCT	GGTCTTGACAAACGTGTGCTTGTAC
PA14_25770	2249326..2249345	yes	TATGAGGACGAATCTCCCGCTTATA	TAGTTGGTGGGTTTCCCTACCGTGT	GGTCTCG	tata	TTACGCGGCCCCAGATTGGG	gttt	tgagacc	GGTACAGTAAGTGAGAATCCTCTCT	GGTCTTGACAAACGTGTGCTTGTAC
PA14_25780	2249701..2249720	yes	TATGAGGACGAATCTCCCGCTTATA	TAGTTGGTGGGTTTCCCTACCGTGT	GGTCTCG	tata	GAGGCGATCGAGGTGGCAGT	gttt	tgagacc	GGTACAGTAAGTGAGAATCCTCTCT	GGTCTTGACAAACGTGTGCTTGTAC
PA14_25790	2251787..2251806	yes	TATGAGGACGAATCTCCCGCTTATA	TAGTTGGTGGGTTTCCCTACCGTGT	GGTCTCG	tata	TGGTCTGGTCGAATTCGTCC	gttt	tgagacc	GGTACAGTAAGTGAGAATCCTCTCT	GGTCTTGACAAACGTGTGCTTGTAC
PA14_25800	2251921..2251940	yes	TATGAGGACGAATCTCCCGCTTATA	TAGTTGGTGGGTTTCCCTACCGTGT	GGTCTCG	tata	CGAAATTCACGAACTTTGCG	gttt	tgagacc	GGTACAGTAAGTGAGAATCCTCTCT	GGTCTTGACAAACGTGTGCTTGTAC
PA14_25810	2252722..2252741	yes	TATGAGGACGAATCTCCCGCTTATA	TAGTTGGTGGGTTTCCCTACCGTGT	GGTCTCG	tata	TGTAGTGGATGGGGAATTCA	gttt	tgagacc	GGTACAGTAAGTGAGAATCCTCTCT	GGTCTTGACAAACGTGTGCTTGTAC
PA14_25820	2253689..2253708	yes	TATGAGGACGAATCTCCCGCTTATA	TAGTTGGTGGGTTTCCCTACCGTGT	GGTCTCG	tata	GGAGCATCGCCAGGGCGATA	gttt	tgagacc	GGTACAGTAAGTGAGAATCCTCTCT	GGTCTTGACAAACGTGTGCTTGTAC
PA14_25830	2254310..2254329	yes	TATGAGGACGAATCTCCCGCTTATA	TAGTTGGTGGGTTTCCCTACCGTGT	GGTCTCG	tata	CAGCAGGTCGTTGGCCTTGC	gttt	tgagacc	GGTACAGTAAGTGAGAATCCTCTCT	GGTCTTGACAAACGTGTGCTTGTAC
PA14_25840	2256500..2256519	yes	TATGAGGACGAATCTCCCGCTTATA	TAGTTGGTGGGTTTCCCTACCGTGT	GGTCTCG	tata	CATGCGGCGGACAGACCGGC	gttt	tgagacc	GGTACAGTAAGTGAGAATCCTCTCT	GGTCTTGACAAACGTGTGCTTGTAC
PA14_25860	2256944..2256963	yes	TATGAGGACGAATCTCCCGCTTATA	TAGTTGGTGGGTTTCCCTACCGTGT	GGTCTCG	tata	CGGAGTTGTCCGCCTTGACG	gttt	tgagacc	GGTACAGTAAGTGAGAATCCTCTCT	GGTCTTGACAAACGTGTGCTTGTAC
PA14_25880	2257651..2257670	yes	TATGAGGACGAATCTCCCGCTTATA	TAGTTGGTGGGTTTCCCTACCGTGT	GGTCTCG	tata	TGTTGTGCTCAGCGATAACC	gttt	tgagacc	GGTACAGTAAGTGAGAATCCTCTCT	GGTCTTGACAAACGTGTGCTTGTAC
PA14_25900	2258769..2258788	yes	TATGAGGACGAATCTCCCGCTTATA	TAGTTGGTGGGTTTCCCTACCGTGT	GGTCTCG	tata	CAGATGAAGCCACGCACGCG	gttt	tgagacc	GGTACAGTAAGTGAGAATCCTCTCT	GGTCTTGACAAACGTGTGCTTGTAC
PA14_25910	2260937..2260956	yes	TATGAGGACGAATCTCCCGCTTATA	TAGTTGGTGGGTTTCCCTACCGTGT	GGTCTCG	tata	GCAGCAGAGCCAGACCGAGG	gttt	tgagacc	GGTACAGTAAGTGAGAATCCTCTCT	GGTCTTGACAAACGTGTGCTTGTAC
PA14_25920	2261825..2261844	yes	TATGAGGACGAATCTCCCGCTTATA	TAGTTGGTGGGTTTCCCTACCGTGT	GGTCTCG	tata	ACCGGCGCCGATGAAATAGA	gttt	tgagacc	GGTACAGTAAGTGAGAATCCTCTCT	GGTCTTGACAAACGTGTGCTTGTAC
PA14_25930	2262251..2262270	yes	TATGAGGACGAATCTCCCGCTTATA	TAGTTGGTGGGTTTCCCTACCGTGT	GGTCTCG	tata	AGCAGGCTGGGGATGGGCAG	gttt	tgagacc	GGTACAGTAAGTGAGAATCCTCTCT	GGTCTTGACAAACGTGTGCTTGTAC
PA14_25940	2263411..2263430	yes	TATGAGGACGAATCTCCCGCTTATA	TAGTTGGTGGGTTTCCCTACCGTGT	GGTCTCG	tata	GGGGCAGCGCCGGACTGGCT	gttt	tgagacc	GGTACAGTAAGTGAGAATCCTCTCT	GGTCTTGACAAACGTGTGCTTGTAC
PA14_25960	2263811..2263830	yes	TATGAGGACGAATCTCCCGCTTATA	TAGTTGGTGGGTTTCCCTACCGTGT	GGTCTCG	tata	CGGACGCAGGGGCCGCGCAA	gttt	tgagacc	GGTACAGTAAGTGAGAATCCTCTCT	GGTCTTGACAAACGTGTGCTTGTAC
PA14_25970	2265010..2265029	yes	TATGAGGACGAATCTCCCGCTTATA	TAGTTGGTGGGTTTCCCTACCGTGT	GGTCTCG	tata	CGCCAGGTTGGGTGCGCAAC	gttt	tgagacc	GGTACAGTAAGTGAGAATCCTCTCT	GGTCTTGACAAACGTGTGCTTGTAC
PA14_25980	2269839..2269858	yes	TATGAGGACGAATCTCCCGCTTATA	TAGTTGGTGGGTTTCCCTACCGTGT	GGTCTCG	tata	AAGGGCGGTCAGTGCGGATA	gttt	tgagacc	GGTACAGTAAGTGAGAATCCTCTCT	GGTCTTGACAAACGTGTGCTTGTAC
PA14_25990	2270455..2270474	yes	TATGAGGACGAATCTCCCGCTTATA	TAGTTGGTGGGTTTCCCTACCGTGT	GGTCTCG	tata	GGCGGACAGGGGGTAATGCA	gttt	tgagacc	GGTACAGTAAGTGAGAATCCTCTCT	GGTCTTGACAAACGTGTGCTTGTAC
PA14_26000	2271492..2271511	yes	TATGAGGACGAATCTCCCGCTTATA	TAGTTGGTGGGTTTCCCTACCGTGT	GGTCTCG	tata	CAGGGCTCCGGGTCTGCTCC	gttt	tgagacc	GGTACAGTAAGTGAGAATCCTCTCT	GGTCTTGACAAACGTGTGCTTGTAC
PA14_26010	2272251..2272270	yes	TATGAGGACGAATCTCCCGCTTATA	TAGTTGGTGGGTTTCCCTACCGTGT	GGTCTCG	tata	CCGGCGATAACGACTGAAAT	gttt	tgagacc	GGTACAGTAAGTGAGAATCCTCTCT	GGTCTTGACAAACGTGTGCTTGTAC
PA14_26020	2275019..2275038	no	TATGAGGACGAATCTCCCGCTTATA	TAGTTGGTGGGTTTCCCTACCGTGT	GGTCTCG	tata	GGCGGAAACCGAGAGGGCGA	gttt	tgagacc	GGTACAGTAAGTGAGAATCCTCTCT	GGTCTTGACAAACGTGTGCTTGTAC
PA14_26050	2275593..2275612	yes	TATGAGGACGAATCTCCCGCTTATA	TAGTTGGTGGGTTTCCCTACCGTGT	GGTCTCG	tata	ACATGGTCAGCACATGTTGC	gttt	tgagacc	GGTACAGTAAGTGAGAATCCTCTCT	GGTCTTGACAAACGTGTGCTTGTAC
PA14_26060	2277371..2277390	yes	TATGAGGACGAATCTCCCGCTTATA	TAGTTGGTGGGTTTCCCTACCGTGT	GGTCTCG	tata	GGCTACCTGCGCGACGCCTG	gttt	tgagacc	GGTACAGTAAGTGAGAATCCTCTCT	GGTCTTGACAAACGTGTGCTTGTAC
PA14_26070	2278046..2278065	yes	TATGAGGACGAATCTCCCGCTTATA	TAGTTGGTGGGTTTCCCTACCGTGT	GGTCTCG	tata	GACAGGCTGTAGACGGTCGC	gttt	tgagacc	GGTACAGTAAGTGAGAATCCTCTCT	GGTCTTGACAAACGTGTGCTTGTAC
PA14_26080	2278499..2278518	yes	TATGAGGACGAATCTCCCGCTTATA	TAGTTGGTGGGTTTCCCTACCGTGT	GGTCTCG	tata	CGTCATGGCGGAAAAGACGC	gttt	tgagacc	GGTACAGTAAGTGAGAATCCTCTCT	GGTCTTGACAAACGTGTGCTTGTAC
PA14_26090	2279619..2279638	yes	TATGAGGACGAATCTCCCGCTTATA	TAGTTGGTGGGTTTCCCTACCGTGT	GGTCTCG	tata	GGCCGCGGCAGAGTCTATCG	gttt	tgagacc	GGTACAGTAAGTGAGAATCCTCTCT	GGTCTTGACAAACGTGTGCTTGTAC
PA14_26110	2280815..2280834	yes	TATGAGGACGAATCTCCCGCTTATA	TAGTTGGTGGGTTTCCCTACCGTGT	GGTCTCG	tata	GCGGCGGCCAGCAGGAGGAT	gttt	tgagacc	GGTACAGTAAGTGAGAATCCTCTCT	GGTCTTGACAAACGTGTGCTTGTAC
PA14_26130	2281995..2282014	yes	TATGAGGACGAATCTCCCGCTTATA	TAGTTGGTGGGTTTCCCTACCGTGT	GGTCTCG	tata	GAGCGGGGAGAGGAGCAGGT	gttt	tgagacc	GGTACAGTAAGTGAGAATCCTCTCT	GGTCTTGACAAACGTGTGCTTGTAC
PA14_26140	2282168..2282187	yes	TATGAGGACGAATCTCCCGCTTATA	TAGTTGGTGGGTTTCCCTACCGTGT	GGTCTCG	tata	GTGTCCCTGTCGAATGCCCG	gttt	tgagacc	GGTACAGTAAGTGAGAATCCTCTCT	GGTCTTGACAAACGTGTGCTTGTAC
PA14_26150	2283619..2283638	yes	TATGAGGACGAATCTCCCGCTTATA	TAGTTGGTGGGTTTCCCTACCGTGT	GGTCTCG	tata	GGCAGGCGGCGGCGCCTGAA	gttt	tgagacc	GGTACAGTAAGTGAGAATCCTCTCT	GGTCTTGACAAACGTGTGCTTGTAC
PA14_26160	2283763..2283782	yes	TATGAGGACGAATCTCCCGCTTATA	TAGTTGGTGGGTTTCCCTACCGTGT	GGTCTCG	tata	CCGCAAGCACGGTGATGGTC	gttt	tgagacc	GGTACAGTAAGTGAGAATCCTCTCT	GGTCTTGACAAACGTGTGCTTGTAC
PA14_26165	2284429..2284448	yes	TATGAGGACGAATCTCCCGCTTATA	TAGTTGGTGGGTTTCCCTACCGTGT	GGTCTCG	tata	GACCGTCCCTCAACTGGCGA	gttt	tgagacc	GGTACAGTAAGTGAGAATCCTCTCT	GGTCTTGACAAACGTGTGCTTGTAC
PA14_26190	2287342..2287361	yes	TATGAGGACGAATCTCCCGCTTATA	TAGTTGGTGGGTTTCCCTACCGTGT	GGTCTCG	tata	TGGACGATGACGATCGAACG	gttt	tgagacc	GGTACAGTAAGTGAGAATCCTCTCT	GGTCTTGACAAACGTGTGCTTGTAC
PA14_26200	2287535..2287554	yes	TATGAGGACGAATCTCCCGCTTATA	TAGTTGGTGGGTTTCCCTACCGTGT	GGTCTCG	tata	GGTTGCGGGAAGTGAACAGG	gttt	tgagacc	GGTACAGTAAGTGAGAATCCTCTCT	GGTCTTGACAAACGTGTGCTTGTAC
PA14_26210	2288426..2288445	yes	TATGAGGACGAATCTCCCGCTTATA	TAGTTGGTGGGTTTCCCTACCGTGT	GGTCTCG	tata	TGTGGATGTCTTCGACCTGC	gttt	tgagacc	GGTACAGTAAGTGAGAATCCTCTCT	GGTCTTGACAAACGTGTGCTTGTAC
PA14_26220	2289133..2289152	no	TATGAGGACGAATCTCCCGCTTATA	TAGTTGGTGGGTTTCCCTACCGTGT	GGTCTCG	tata	GTTGCAGGCCGTCGGTCCAC	gttt	tgagacc	GGTACAGTAAGTGAGAATCCTCTCT	GGTCTTGACAAACGTGTGCTTGTAC
PA14_26230	2289834..2289853	yes	TATGAGGACGAATCTCCCGCTTATA	TAGTTGGTGGGTTTCCCTACCGTGT	GGTCTCG	tata	GGGTGCCGGCGAGTATCTGC	gttt	tgagacc	GGTACAGTAAGTGAGAATCCTCTCT	GGTCTTGACAAACGTGTGCTTGTAC
PA14_26240	2290685..2290704	yes	TATGAGGACGAATCTCCCGCTTATA	TAGTTGGTGGGTTTCCCTACCGTGT	GGTCTCG	tata	GGAGAGGGCGATGCTGCCGA	gttt	tgagacc	GGTACAGTAAGTGAGAATCCTCTCT	GGTCTTGACAAACGTGTGCTTGTAC
PA14_26260	2291920..2291939	yes	TATGAGGACGAATCTCCCGCTTATA	TAGTTGGTGGGTTTCCCTACCGTGT	GGTCTCG	tata	GGCGGGCAGGACGGCAGGCT	gttt	tgagacc	GGTACAGTAAGTGAGAATCCTCTCT	GGTCTTGACAAACGTGTGCTTGTAC
PA14_26270	2292060..2292079	yes	TATGAGGACGAATCTCCCGCTTATA	TAGTTGGTGGGTTTCCCTACCGTGT	GGTCTCG	tata	CTTACCGAGGTGACAACGAA	gttt	tgagacc	GGTACAGTAAGTGAGAATCCTCTCT	GGTCTTGACAAACGTGTGCTTGTAC
PA14_26280	2293144..2293163	yes	TATGAGGACGAATCTCCCGCTTATA	TAGTTGGTGGGTTTCCCTACCGTGT	GGTCTCG	tata	CGATTTTCCTGCGGAACGAT	gttt	tgagacc	GGTACAGTAAGTGAGAATCCTCTCT	GGTCTTGACAAACGTGTGCTTGTAC
PA14_26300	2294995..2295014	yes	TATGAGGACGAATCTCCCGCTTATA	TAGTTGGTGGGTTTCCCTACCGTGT	GGTCTCG	tata	GATCCCGCCGGCGATTACCA	gttt	tgagacc	GGTACAGTAAGTGAGAATCCTCTCT	GGTCTTGACAAACGTGTGCTTGTAC
PA14_26310	2295824..2295843	yes	TATGAGGACGAATCTCCCGCTTATA	TAGTTGGTGGGTTTCCCTACCGTGT	GGTCTCG	tata	CGGTCTTGCCTTTGATGGAG	gttt	tgagacc	GGTACAGTAAGTGAGAATCCTCTCT	GGTCTTGACAAACGTGTGCTTGTAC
PA14_26330	2296076..2296095	yes	TATGAGGACGAATCTCCCGCTTATA	TAGTTGGTGGGTTTCCCTACCGTGT	GGTCTCG	tata	GGGCCAGGTCGATCCAGTCT	gttt	tgagacc	GGTACAGTAAGTGAGAATCCTCTCT	GGTCTTGACAAACGTGTGCTTGTAC
PA14_26340	2296962..2296981	yes	TATGAGGACGAATCTCCCGCTTATA	TAGTTGGTGGGTTTCCCTACCGTGT	GGTCTCG	tata	GAACAGCAGGAAGGGCACGA	gttt	tgagacc	GGTACAGTAAGTGAGAATCCTCTCT	GGTCTTGACAAACGTGTGCTTGTAC
PA14_26350	2297677..2297696	yes	TATGAGGACGAATCTCCCGCTTATA	TAGTTGGTGGGTTTCCCTACCGTGT	GGTCTCG	tata	TCGAAGAAGGCAGTGATGTC	gttt	tgagacc	GGTACAGTAAGTGAGAATCCTCTCT	GGTCTTGACAAACGTGTGCTTGTAC
PA14_26360	2299537..2299556	yes	TATGAGGACGAATCTCCCGCTTATA	TAGTTGGTGGGTTTCCCTACCGTGT	GGTCTCG	tata	GGCGCGAGGGCTGCGGAACA	gttt	tgagacc	GGTACAGTAAGTGAGAATCCTCTCT	GGTCTTGACAAACGTGTGCTTGTAC
PA14_26390	2300501..2300520	yes	TATGAGGACGAATCTCCCGCTTATA	TAGTTGGTGGGTTTCCCTACCGTGT	GGTCTCG	tata	GCAGCAGGTGGTGCAGGATC	gttt	tgagacc	GGTACAGTAAGTGAGAATCCTCTCT	GGTCTTGACAAACGTGTGCTTGTAC
PA14_26400	2301272..2301291	yes	TATGAGGACGAATCTCCCGCTTATA	TAGTTGGTGGGTTTCCCTACCGTGT	GGTCTCG	tata	GTGCAGGGCATCGAGGTGAA	gttt	tgagacc	GGTACAGTAAGTGAGAATCCTCTCT	GGTCTTGACAAACGTGTGCTTGTAC
PA14_26420	2303485..2303504	yes	TATGAGGACGAATCTCCCGCTTATA	TAGTTGGTGGGTTTCCCTACCGTGT	GGTCTCG	tata	GTGCGCAAACGGCTGAAGCG	gttt	tgagacc	GGTACAGTAAGTGAGAATCCTCTCT	GGTCTTGACAAACGTGTGCTTGTAC
PA14_26450	2304156..2304175	yes	TATGAGGACGAATCTCCCGCTTATA	TAGTTGGTGGGTTTCCCTACCGTGT	GGTCTCG	tata	GCGAGGAAGATCAGGGAAAC	gttt	tgagacc	GGTACAGTAAGTGAGAATCCTCTCT	GGTCTTGACAAACGTGTGCTTGTAC
PA14_26460	2305468..2305487	yes	TATGAGGACGAATCTCCCGCTTATA	TAGTTGGTGGGTTTCCCTACCGTGT	GGTCTCG	tata	CGATCCCGCCGAGCAGCAAC	gttt	tgagacc	GGTACAGTAAGTGAGAATCCTCTCT	GGTCTTGACAAACGTGTGCTTGTAC
PA14_26470	2306560..2306579	yes	TATGAGGACGAATCTCCCGCTTATA	TAGTTGGTGGGTTTCCCTACCGTGT	GGTCTCG	tata	CAACGGCGCGGGCTGCTCGG	gttt	tgagacc	GGTACAGTAAGTGAGAATCCTCTCT	GGTCTTGACAAACGTGTGCTTGTAC
PA14_26480	2307792..2307811	yes	TATGAGGACGAATCTCCCGCTTATA	TAGTTGGTGGGTTTCCCTACCGTGT	GGTCTCG	tata	CCCACCAGGGTCAGCCAGGG	gttt	tgagacc	GGTACAGTAAGTGAGAATCCTCTCT	GGTCTTGACAAACGTGTGCTTGTAC
PA14_26485	2308178..2308197	yes	TATGAGGACGAATCTCCCGCTTATA	TAGTTGGTGGGTTTCCCTACCGTGT	GGTCTCG	tata	CGGTACACCCCGCCCGATGT	gttt	tgagacc	GGTACAGTAAGTGAGAATCCTCTCT	GGTCTTGACAAACGTGTGCTTGTAC
PA14_26500	2309646..2309665	yes	TATGAGGACGAATCTCCCGCTTATA	TAGTTGGTGGGTTTCCCTACCGTGT	GGTCTCG	tata	GATAGATCGCCTGGCCATCG	gttt	tgagacc	GGTACAGTAAGTGAGAATCCTCTCT	GGTCTTGACAAACGTGTGCTTGTAC
PA14_26510	2310275..2310294	yes	TATGAGGACGAATCTCCCGCTTATA	TAGTTGGTGGGTTTCCCTACCGTGT	GGTCTCG	tata	CGACGCCCAGGCCCAGCAGG	gttt	tgagacc	GGTACAGTAAGTGAGAATCCTCTCT	GGTCTTGACAAACGTGTGCTTGTAC
PA14_26530	2311010..2311029	yes	TATGAGGACGAATCTCCCGCTTATA	TAGTTGGTGGGTTTCCCTACCGTGT	GGTCTCG	tata	GACGATGGCCGGAACCTGCT	gttt	tgagacc	GGTACAGTAAGTGAGAATCCTCTCT	GGTCTTGACAAACGTGTGCTTGTAC
PA14_26540	2312753..2312772	yes	TATGAGGACGAATCTCCCGCTTATA	TAGTTGGTGGGTTTCCCTACCGTGT	GGTCTCG	tata	GCGGCACGGGGAACAGCGAA	gttt	tgagacc	GGTACAGTAAGTGAGAATCCTCTCT	GGTCTTGACAAACGTGTGCTTGTAC
PA14_26550	2313616..2313635	yes	TATGAGGACGAATCTCCCGCTTATA	TAGTTGGTGGGTTTCCCTACCGTGT	GGTCTCG	tata	GGTCAGCGCGGCGAGGCCTG	gttt	tgagacc	GGTACAGTAAGTGAGAATCCTCTCT	GGTCTTGACAAACGTGTGCTTGTAC
PA14_26560	2313956..2313975	yes	TATGAGGACGAATCTCCCGCTTATA	TAGTTGGTGGGTTTCCCTACCGTGT	GGTCTCG	tata	GCGAAGAGAGTCGCTTTGCC	gttt	tgagacc	GGTACAGTAAGTGAGAATCCTCTCT	GGTCTTGACAAACGTGTGCTTGTAC
PA14_26570	2314972..2314991	yes	TATGAGGACGAATCTCCCGCTTATA	TAGTTGGTGGGTTTCCCTACCGTGT	GGTCTCG	tata	GGCGATCACCAGCCCCGGCA	gttt	tgagacc	GGTACAGTAAGTGAGAATCCTCTCT	GGTCTTGACAAACGTGTGCTTGTAC
PA14_26580	2315685..2315704	yes	TATGAGGACGAATCTCCCGCTTATA	TAGTTGGTGGGTTTCCCTACCGTGT	GGTCTCG	tata	AACGGGCAAAGCGGGGCTGG	gttt	tgagacc	GGTACAGTAAGTGAGAATCCTCTCT	GGTCTTGACAAACGTGTGCTTGTAC
PA14_26590	2316274..2316293	yes	TATGAGGACGAATCTCCCGCTTATA	TAGTTGGTGGGTTTCCCTACCGTGT	GGTCTCG	tata	GCGTTGGTAAAGCAGCAGAT	gttt	tgagacc	GGTACAGTAAGTGAGAATCCTCTCT	GGTCTTGACAAACGTGTGCTTGTAC
PA14_26600	2318050..2318069	yes	TATGAGGACGAATCTCCCGCTTATA	TAGTTGGTGGGTTTCCCTACCGTGT	GGTCTCG	tata	GGCGGCCGTCGTGGCGCTGG	gttt	tgagacc	GGTACAGTAAGTGAGAATCCTCTCT	GGTCTTGACAAACGTGTGCTTGTAC
PA14_26610	2318677..2318696	yes	TATGAGGACGAATCTCCCGCTTATA	TAGTTGGTGGGTTTCCCTACCGTGT	GGTCTCG	tata	GCTGCTGCGGCGCGTGGGCG	gttt	tgagacc	GGTACAGTAAGTGAGAATCCTCTCT	GGTCTTGACAAACGTGTGCTTGTAC
PA14_26620	2319738..2319757	yes	TATGAGGACGAATCTCCCGCTTATA	TAGTTGGTGGGTTTCCCTACCGTGT	GGTCTCG	tata	CTTCGAAGCTGTTTTCGGCG	gttt	tgagacc	GGTACAGTAAGTGAGAATCCTCTCT	GGTCTTGACAAACGTGTGCTTGTAC
PA14_26640	2321964..2321983	yes	TATGAGGACGAATCTCCCGCTTATA	TAGTTGGTGGGTTTCCCTACCGTGT	GGTCTCG	tata	GAAAGTGATCAGGTCGGCGT	gttt	tgagacc	GGTACAGTAAGTGAGAATCCTCTCT	GGTCTTGACAAACGTGTGCTTGTAC
PA14_26650	2322918..2322937	yes	TATGAGGACGAATCTCCCGCTTATA	TAGTTGGTGGGTTTCCCTACCGTGT	GGTCTCG	tata	CTCCCGGCCGATGCCGCGGC	gttt	tgagacc	GGTACAGTAAGTGAGAATCCTCTCT	GGTCTTGACAAACGTGTGCTTGTAC
PA14_26670	2324989..2325008	yes	TATGAGGACGAATCTCCCGCTTATA	TAGTTGGTGGGTTTCCCTACCGTGT	GGTCTCG	tata	ACGAGGATCTTGTTGAAGCT	gttt	tgagacc	GGTACAGTAAGTGAGAATCCTCTCT	GGTCTTGACAAACGTGTGCTTGTAC
PA14_26690	2325810..2325829	yes	TATGAGGACGAATCTCCCGCTTATA	TAGTTGGTGGGTTTCCCTACCGTGT	GGTCTCG	tata	CTCGACGGGTTCCAGCAGCA	gttt	tgagacc	GGTACAGTAAGTGAGAATCCTCTCT	GGTCTTGACAAACGTGTGCTTGTAC
PA14_26700	2327003..2327022	yes	TATGAGGACGAATCTCCCGCTTATA	TAGTTGGTGGGTTTCCCTACCGTGT	GGTCTCG	tata	GCGGAGTTCCTCGTGTTCCT	gttt	tgagacc	GGTACAGTAAGTGAGAATCCTCTCT	GGTCTTGACAAACGTGTGCTTGTAC
PA14_26720	2328743..2328762	yes	TATGAGGACGAATCTCCCGCTTATA	TAGTTGGTGGGTTTCCCTACCGTGT	GGTCTCG	tata	TCGAGTTCCGACTGGATCGC	gttt	tgagacc	GGTACAGTAAGTGAGAATCCTCTCT	GGTCTTGACAAACGTGTGCTTGTAC
PA14_26730	2329606..2329625	yes	TATGAGGACGAATCTCCCGCTTATA	TAGTTGGTGGGTTTCCCTACCGTGT	GGTCTCG	tata	GGCCGTCGAACAGGCCAGGT	gttt	tgagacc	GGTACAGTAAGTGAGAATCCTCTCT	GGTCTTGACAAACGTGTGCTTGTAC
PA14_26750	2331491..2331510	yes	TATGAGGACGAATCTCCCGCTTATA	TAGTTGGTGGGTTTCCCTACCGTGT	GGTCTCG	tata	CGAGGCGCAGCCGATGCGTA	gttt	tgagacc	GGTACAGTAAGTGAGAATCCTCTCT	GGTCTTGACAAACGTGTGCTTGTAC
PA14_26760	2331826..2331845	yes	TATGAGGACGAATCTCCCGCTTATA	TAGTTGGTGGGTTTCCCTACCGTGT	GGTCTCG	tata	TTCCGGATCGGTGAGCTGTC	gttt	tgagacc	GGTACAGTAAGTGAGAATCCTCTCT	GGTCTTGACAAACGTGTGCTTGTAC
PA14_26770	2333125..2333144	yes	TATGAGGACGAATCTCCCGCTTATA	TAGTTGGTGGGTTTCCCTACCGTGT	GGTCTCG	tata	AGGAACAGAATGGGTAGAAG	gttt	tgagacc	GGTACAGTAAGTGAGAATCCTCTCT	GGTCTTGACAAACGTGTGCTTGTAC
PA14_26780	2333540..2333559	yes	TATGAGGACGAATCTCCCGCTTATA	TAGTTGGTGGGTTTCCCTACCGTGT	GGTCTCG	tata	ATGATCAACCAGGCGTACCA	gttt	tgagacc	GGTACAGTAAGTGAGAATCCTCTCT	GGTCTTGACAAACGTGTGCTTGTAC
PA14_26810	2334005..2334024	yes	TATGAGGACGAATCTCCCGCTTATA	TAGTTGGTGGGTTTCCCTACCGTGT	GGTCTCG	tata	GATGGCGGCCCCAGAGGTCG	gttt	tgagacc	GGTACAGTAAGTGAGAATCCTCTCT	GGTCTTGACAAACGTGTGCTTGTAC
PA14_26830	2335113..2335132	yes	TATGAGGACGAATCTCCCGCTTATA	TAGTTGGTGGGTTTCCCTACCGTGT	GGTCTCG	tata	AGAGGATGCGGACGGGAGAT	gttt	tgagacc	GGTACAGTAAGTGAGAATCCTCTCT	GGTCTTGACAAACGTGTGCTTGTAC
PA14_26850	2336506..2336525	yes	TATGAGGACGAATCTCCCGCTTATA	TAGTTGGTGGGTTTCCCTACCGTGT	GGTCTCG	tata	CCCGGTTCGTCGTTGAAGTC	gttt	tgagacc	GGTACAGTAAGTGAGAATCCTCTCT	GGTCTTGACAAACGTGTGCTTGTAC
PA14_26860	2336602..2336621	yes	TATGAGGACGAATCTCCCGCTTATA	TAGTTGGTGGGTTTCCCTACCGTGT	GGTCTCG	tata	ACGAAGGCCTCGAGGGATTC	gttt	tgagacc	GGTACAGTAAGTGAGAATCCTCTCT	GGTCTTGACAAACGTGTGCTTGTAC
PA14_26870	2338116..2338135	yes	TATGAGGACGAATCTCCCGCTTATA	TAGTTGGTGGGTTTCCCTACCGTGT	GGTCTCG	tata	GTTCTTTGGATAAACGTGGG	gttt	tgagacc	GGTACAGTAAGTGAGAATCCTCTCT	GGTCTTGACAAACGTGTGCTTGTAC
PA14_26880	2338230..2338249	yes	TATGAGGACGAATCTCCCGCTTATA	TAGTTGGTGGGTTTCCCTACCGTGT	GGTCTCG	tata	CTTGGTGAAGCTGCCGGTTT	gttt	tgagacc	GGTACAGTAAGTGAGAATCCTCTCT	GGTCTTGACAAACGTGTGCTTGTAC
PA14_26890	2339184..2339203	yes	TATGAGGACGAATCTCCCGCTTATA	TAGTTGGTGGGTTTCCCTACCGTGT	GGTCTCG	tata	GATGATGGGGGACTGGCAGG	gttt	tgagacc	GGTACAGTAAGTGAGAATCCTCTCT	GGTCTTGACAAACGTGTGCTTGTAC
PA14_26910	2340137..2340156	yes	TATGAGGACGAATCTCCCGCTTATA	TAGTTGGTGGGTTTCCCTACCGTGT	GGTCTCG	tata	CGCCTTCAGGCAGGCTTCCA	gttt	tgagacc	GGTACAGTAAGTGAGAATCCTCTCT	GGTCTTGACAAACGTGTGCTTGTAC
PA14_26920	2341062..2341081	yes	TATGAGGACGAATCTCCCGCTTATA	TAGTTGGTGGGTTTCCCTACCGTGT	GGTCTCG	tata	TTCAGCCAGCGCTGCCAGCG	gttt	tgagacc	GGTACAGTAAGTGAGAATCCTCTCT	GGTCTTGACAAACGTGTGCTTGTAC
PA14_26930	2342009..2342028	yes	TATGAGGACGAATCTCCCGCTTATA	TAGTTGGTGGGTTTCCCTACCGTGT	GGTCTCG	tata	AGCCAGACCAGCGCGACCCG	gttt	tgagacc	GGTACAGTAAGTGAGAATCCTCTCT	GGTCTTGACAAACGTGTGCTTGTAC
PA14_26940	2344028..2344047	yes	TATGAGGACGAATCTCCCGCTTATA	TAGTTGGTGGGTTTCCCTACCGTGT	GGTCTCG	tata	CACCTGCTGGCCGATCACCT	gttt	tgagacc	GGTACAGTAAGTGAGAATCCTCTCT	GGTCTTGACAAACGTGTGCTTGTAC
PA14_26960	2344861..2344880	yes	TATGAGGACGAATCTCCCGCTTATA	TAGTTGGTGGGTTTCCCTACCGTGT	GGTCTCG	tata	GCGGACCGCCTGGATCAATT	gttt	tgagacc	GGTACAGTAAGTGAGAATCCTCTCT	GGTCTTGACAAACGTGTGCTTGTAC
PA14_26970	2347200..2347219	yes	TATGAGGACGAATCTCCCGCTTATA	TAGTTGGTGGGTTTCCCTACCGTGT	GGTCTCG	tata	AGCTTTGTCGGATCGAGCAG	gttt	tgagacc	GGTACAGTAAGTGAGAATCCTCTCT	GGTCTTGACAAACGTGTGCTTGTAC
PA14_26980	2347704..2347723	yes	TATGAGGACGAATCTCCCGCTTATA	TAGTTGGTGGGTTTCCCTACCGTGT	GGTCTCG	tata	ACGATTAATTGACGCATTGA	gttt	tgagacc	GGTACAGTAAGTGAGAATCCTCTCT	GGTCTTGACAAACGTGTGCTTGTAC
PA14_26990	2348138..2348157	yes	TATGAGGACGAATCTCCCGCTTATA	TAGTTGGTGGGTTTCCCTACCGTGT	GGTCTCG	tata	CATTGCCAGGCGAGCAGGTT	gttt	tgagacc	GGTACAGTAAGTGAGAATCCTCTCT	GGTCTTGACAAACGTGTGCTTGTAC
PA14_27000	2349744..2349763	yes	TATGAGGACGAATCTCCCGCTTATA	TAGTTGGTGGGTTTCCCTACCGTGT	GGTCTCG	tata	CAGTGGAATGTCGCTGATCC	gttt	tgagacc	GGTACAGTAAGTGAGAATCCTCTCT	GGTCTTGACAAACGTGTGCTTGTAC
PA14_27020	2350656..2350675	yes	TATGAGGACGAATCTCCCGCTTATA	TAGTTGGTGGGTTTCCCTACCGTGT	GGTCTCG	tata	TTCACGTTCCAGGGCGAAGC	gttt	tgagacc	GGTACAGTAAGTGAGAATCCTCTCT	GGTCTTGACAAACGTGTGCTTGTAC
PA14_27050	2350994..2351013	yes	TATGAGGACGAATCTCCCGCTTATA	TAGTTGGTGGGTTTCCCTACCGTGT	GGTCTCG	tata	GCAAGGGTGCGAGCACCAGC	gttt	tgagacc	GGTACAGTAAGTGAGAATCCTCTCT	GGTCTTGACAAACGTGTGCTTGTAC
PA14_27070	2352500..2352519	yes	TATGAGGACGAATCTCCCGCTTATA	TAGTTGGTGGGTTTCCCTACCGTGT	GGTCTCG	tata	GACAGGATGGTCTTGATCAG	gttt	tgagacc	GGTACAGTAAGTGAGAATCCTCTCT	GGTCTTGACAAACGTGTGCTTGTAC
PA14_27090	2353934..2353953	yes	TATGAGGACGAATCTCCCGCTTATA	TAGTTGGTGGGTTTCCCTACCGTGT	GGTCTCG	tata	GCCGGCATGACCTGGGGGGC	gttt	tgagacc	GGTACAGTAAGTGAGAATCCTCTCT	GGTCTTGACAAACGTGTGCTTGTAC
PA14_27100	2355038..2355057	yes	TATGAGGACGAATCTCCCGCTTATA	TAGTTGGTGGGTTTCCCTACCGTGT	GGTCTCG	tata	GGCTGGCAGCGAGAGAGGCG	gttt	tgagacc	GGTACAGTAAGTGAGAATCCTCTCT	GGTCTTGACAAACGTGTGCTTGTAC
PA14_27110	2355820..2355839	yes	TATGAGGACGAATCTCCCGCTTATA	TAGTTGGTGGGTTTCCCTACCGTGT	GGTCTCG	tata	AACAGGCGAAGAGAGCGATC	gttt	tgagacc	GGTACAGTAAGTGAGAATCCTCTCT	GGTCTTGACAAACGTGTGCTTGTAC
PA14_27120	2355907..2355926	yes	TATGAGGACGAATCTCCCGCTTATA	TAGTTGGTGGGTTTCCCTACCGTGT	GGTCTCG	tata	CCGCAAGTTGCTGTTTAAAT	gttt	tgagacc	GGTACAGTAAGTGAGAATCCTCTCT	GGTCTTGACAAACGTGTGCTTGTAC
PA14_27130	2356821..2356840	yes	TATGAGGACGAATCTCCCGCTTATA	TAGTTGGTGGGTTTCCCTACCGTGT	GGTCTCG	tata	GGGGTGCCGGCGGTGCGCGG	gttt	tgagacc	GGTACAGTAAGTGAGAATCCTCTCT	GGTCTTGACAAACGTGTGCTTGTAC
PA14_27140	2359377..2359396	yes	TATGAGGACGAATCTCCCGCTTATA	TAGTTGGTGGGTTTCCCTACCGTGT	GGTCTCG	tata	AGGCTCAGCAGGCGGGAGAG	gttt	tgagacc	GGTACAGTAAGTGAGAATCCTCTCT	GGTCTTGACAAACGTGTGCTTGTAC
PA14_27150	2360065..2360084	yes	TATGAGGACGAATCTCCCGCTTATA	TAGTTGGTGGGTTTCCCTACCGTGT	GGTCTCG	tata	GTTCTGCGCGTTGAGAATGC	gttt	tgagacc	GGTACAGTAAGTGAGAATCCTCTCT	GGTCTTGACAAACGTGTGCTTGTAC
PA14_27160	2360146..2360165	yes	TATGAGGACGAATCTCCCGCTTATA	TAGTTGGTGGGTTTCCCTACCGTGT	GGTCTCG	tata	CCGCGGCCTGCTGGGTCAGC	gttt	tgagacc	GGTACAGTAAGTGAGAATCCTCTCT	GGTCTTGACAAACGTGTGCTTGTAC
PA14_27170	2360772..2360791	yes	TATGAGGACGAATCTCCCGCTTATA	TAGTTGGTGGGTTTCCCTACCGTGT	GGTCTCG	tata	TAGAGGGTCCAGGCGGGACG	gttt	tgagacc	GGTACAGTAAGTGAGAATCCTCTCT	GGTCTTGACAAACGTGTGCTTGTAC
PA14_27180	2361140..2361159	yes	TATGAGGACGAATCTCCCGCTTATA	TAGTTGGTGGGTTTCCCTACCGTGT	GGTCTCG	tata	GCGAAAGACAGTGAGACAAC	gttt	tgagacc	GGTACAGTAAGTGAGAATCCTCTCT	GGTCTTGACAAACGTGTGCTTGTAC
PA14_27190	2362942..2362961	no	TATGAGGACGAATCTCCCGCTTATA	TAGTTGGTGGGTTTCCCTACCGTGT	GGTCTCG	tata	GGCGTGCTCCTTCAACCACT	gttt	tgagacc	GGTACAGTAAGTGAGAATCCTCTCT	GGTCTTGACAAACGTGTGCTTGTAC
PA14_27200	2363215..2363234	yes	TATGAGGACGAATCTCCCGCTTATA	TAGTTGGTGGGTTTCCCTACCGTGT	GGTCTCG	tata	CACGGCCTGACCGTGCTCGG	gttt	tgagacc	GGTACAGTAAGTGAGAATCCTCTCT	GGTCTTGACAAACGTGTGCTTGTAC
PA14_27210	2364313..2364332	yes	TATGAGGACGAATCTCCCGCTTATA	TAGTTGGTGGGTTTCCCTACCGTGT	GGTCTCG	tata	GCCGGCGCGGAACTCTTGAG	gttt	tgagacc	GGTACAGTAAGTGAGAATCCTCTCT	GGTCTTGACAAACGTGTGCTTGTAC
PA14_27220	2365356..2365375	yes	TATGAGGACGAATCTCCCGCTTATA	TAGTTGGTGGGTTTCCCTACCGTGT	GGTCTCG	tata	TGCGGTGTAGAGAGCCTTGA	gttt	tgagacc	GGTACAGTAAGTGAGAATCCTCTCT	GGTCTTGACAAACGTGTGCTTGTAC
PA14_27230	2365959..2365978	yes	TATGAGGACGAATCTCCCGCTTATA	TAGTTGGTGGGTTTCCCTACCGTGT	GGTCTCG	tata	GCAAGGGGTGGTGGGCAGTC	gttt	tgagacc	GGTACAGTAAGTGAGAATCCTCTCT	GGTCTTGACAAACGTGTGCTTGTAC
PA14_27250	2367027..2367046	yes	TATGAGGACGAATCTCCCGCTTATA	TAGTTGGTGGGTTTCCCTACCGTGT	GGTCTCG	tata	TGCTCATGCCTTTGCGTGAT	gttt	tgagacc	GGTACAGTAAGTGAGAATCCTCTCT	GGTCTTGACAAACGTGTGCTTGTAC
PA14_27270	2367154..2367173	yes	TATGAGGACGAATCTCCCGCTTATA	TAGTTGGTGGGTTTCCCTACCGTGT	GGTCTCG	tata	AACCGAGCACCATCCCCAGC	gttt	tgagacc	GGTACAGTAAGTGAGAATCCTCTCT	GGTCTTGACAAACGTGTGCTTGTAC
PA14_27280	2368703..2368722	no	TATGAGGACGAATCTCCCGCTTATA	TAGTTGGTGGGTTTCCCTACCGTGT	GGTCTCG	tata	ATTCCGTATCGATGCCGGGC	gttt	tgagacc	GGTACAGTAAGTGAGAATCCTCTCT	GGTCTTGACAAACGTGTGCTTGTAC
PA14_27290	2368868..2368887	yes	TATGAGGACGAATCTCCCGCTTATA	TAGTTGGTGGGTTTCCCTACCGTGT	GGTCTCG	tata	AGGCGGGATGGGATGCAGCG	gttt	tgagacc	GGTACAGTAAGTGAGAATCCTCTCT	GGTCTTGACAAACGTGTGCTTGTAC
PA14_27310	2369165..2369184	yes	TATGAGGACGAATCTCCCGCTTATA	TAGTTGGTGGGTTTCCCTACCGTGT	GGTCTCG	tata	CAGGCGGCGGGCTTCGGCGA	gttt	tgagacc	GGTACAGTAAGTGAGAATCCTCTCT	GGTCTTGACAAACGTGTGCTTGTAC
PA14_27330	2371714..2371733	yes	TATGAGGACGAATCTCCCGCTTATA	TAGTTGGTGGGTTTCCCTACCGTGT	GGTCTCG	tata	AGCTCTCGGGGCTCCAGGAC	gttt	tgagacc	GGTACAGTAAGTGAGAATCCTCTCT	GGTCTTGACAAACGTGTGCTTGTAC
PA14_27350	2371973..2371992	yes	TATGAGGACGAATCTCCCGCTTATA	TAGTTGGTGGGTTTCCCTACCGTGT	GGTCTCG	tata	AGTCGCCGGACTCGATGACC	gttt	tgagacc	GGTACAGTAAGTGAGAATCCTCTCT	GGTCTTGACAAACGTGTGCTTGTAC
PA14_27360	2373452..2373471	yes	TATGAGGACGAATCTCCCGCTTATA	TAGTTGGTGGGTTTCCCTACCGTGT	GGTCTCG	tata	GCGGCTGATGCGTCCTGGGA	gttt	tgagacc	GGTACAGTAAGTGAGAATCCTCTCT	GGTCTTGACAAACGTGTGCTTGTAC
PA14_27370	2373828..2373847	yes	TATGAGGACGAATCTCCCGCTTATA	TAGTTGGTGGGTTTCCCTACCGTGT	GGTCTCG	tata	CCGACGGTTTCCTGAGTCAT	gttt	tgagacc	GGTACAGTAAGTGAGAATCCTCTCT	GGTCTTGACAAACGTGTGCTTGTAC
PA14_27390	2376607..2376626	yes	TATGAGGACGAATCTCCCGCTTATA	TAGTTGGTGGGTTTCCCTACCGTGT	GGTCTCG	tata	CCGTGGGAAATATAGAGAGT	gttt	tgagacc	GGTACAGTAAGTGAGAATCCTCTCT	GGTCTTGACAAACGTGTGCTTGTAC
PA14_27400	2377670..2377689	yes	TATGAGGACGAATCTCCCGCTTATA	TAGTTGGTGGGTTTCCCTACCGTGT	GGTCTCG	tata	AGGTCCGGATACCGTGCAGC	gttt	tgagacc	GGTACAGTAAGTGAGAATCCTCTCT	GGTCTTGACAAACGTGTGCTTGTAC
PA14_27410	2379139..2379158	yes	TATGAGGACGAATCTCCCGCTTATA	TAGTTGGTGGGTTTCCCTACCGTGT	GGTCTCG	tata	AGGCTGGCAATAAGCAGGAG	gttt	tgagacc	GGTACAGTAAGTGAGAATCCTCTCT	GGTCTTGACAAACGTGTGCTTGTAC
PA14_27420	2380169..2380188	yes	TATGAGGACGAATCTCCCGCTTATA	TAGTTGGTGGGTTTCCCTACCGTGT	GGTCTCG	tata	CAGTAGGATCAGGACCAGCA	gttt	tgagacc	GGTACAGTAAGTGAGAATCCTCTCT	GGTCTTGACAAACGTGTGCTTGTAC
PA14_27430	2381803..2381822	yes	TATGAGGACGAATCTCCCGCTTATA	TAGTTGGTGGGTTTCCCTACCGTGT	GGTCTCG	tata	CGTCGGCTGGCCGAGCGGGG	gttt	tgagacc	GGTACAGTAAGTGAGAATCCTCTCT	GGTCTTGACAAACGTGTGCTTGTAC
PA14_27440	2382893..2382912	yes	TATGAGGACGAATCTCCCGCTTATA	TAGTTGGTGGGTTTCCCTACCGTGT	GGTCTCG	tata	TATCGGGAAGATGCATGGAG	gttt	tgagacc	GGTACAGTAAGTGAGAATCCTCTCT	GGTCTTGACAAACGTGTGCTTGTAC
PA14_27450	2383073..2383092	no	TATGAGGACGAATCTCCCGCTTATA	TAGTTGGTGGGTTTCCCTACCGTGT	GGTCTCG	tata	CGATGGCGACCAGGAGTGTA	gttt	tgagacc	GGTACAGTAAGTGAGAATCCTCTCT	GGTCTTGACAAACGTGTGCTTGTAC
PA14_27460	2383592..2383611	yes	TATGAGGACGAATCTCCCGCTTATA	TAGTTGGTGGGTTTCCCTACCGTGT	GGTCTCG	tata	GATCTGGTTGTTCGCCCAGC	gttt	tgagacc	GGTACAGTAAGTGAGAATCCTCTCT	GGTCTTGACAAACGTGTGCTTGTAC
PA14_27470	2385352..2385371	yes	TATGAGGACGAATCTCCCGCTTATA	TAGTTGGTGGGTTTCCCTACCGTGT	GGTCTCG	tata	TGCCGCTGTCGAAATCGGCG	gttt	tgagacc	GGTACAGTAAGTGAGAATCCTCTCT	GGTCTTGACAAACGTGTGCTTGTAC
PA14_27480	2386364..2386383	yes	TATGAGGACGAATCTCCCGCTTATA	TAGTTGGTGGGTTTCCCTACCGTGT	GGTCTCG	tata	GGTTGGTGGCCAGGAACAAC	gttt	tgagacc	GGTACAGTAAGTGAGAATCCTCTCT	GGTCTTGACAAACGTGTGCTTGTAC
PA14_27490	2386938..2386957	yes	TATGAGGACGAATCTCCCGCTTATA	TAGTTGGTGGGTTTCCCTACCGTGT	GGTCTCG	tata	GGCCGCCAGCGGCGTCCTTG	gttt	tgagacc	GGTACAGTAAGTGAGAATCCTCTCT	GGTCTTGACAAACGTGTGCTTGTAC
PA14_27500	2388195..2388214	yes	TATGAGGACGAATCTCCCGCTTATA	TAGTTGGTGGGTTTCCCTACCGTGT	GGTCTCG	tata	GCGAATGTCATAGCAGACGT	gttt	tgagacc	GGTACAGTAAGTGAGAATCCTCTCT	GGTCTTGACAAACGTGTGCTTGTAC
PA14_27510	2388451..2388470	yes	TATGAGGACGAATCTCCCGCTTATA	TAGTTGGTGGGTTTCCCTACCGTGT	GGTCTCG	tata	TCCTCGCGCCAGGAGTCCAG	gttt	tgagacc	GGTACAGTAAGTGAGAATCCTCTCT	GGTCTTGACAAACGTGTGCTTGTAC
PA14_27520	2388967..2388986	yes	TATGAGGACGAATCTCCCGCTTATA	TAGTTGGTGGGTTTCCCTACCGTGT	GGTCTCG	tata	TCGCCCTTGATGGTGGTGCA	gttt	tgagacc	GGTACAGTAAGTGAGAATCCTCTCT	GGTCTTGACAAACGTGTGCTTGTAC
PA14_27530	2389432..2389451	yes	TATGAGGACGAATCTCCCGCTTATA	TAGTTGGTGGGTTTCCCTACCGTGT	GGTCTCG	tata	CGGTCTGGCGACTTTTCCCC	gttt	tgagacc	GGTACAGTAAGTGAGAATCCTCTCT	GGTCTTGACAAACGTGTGCTTGTAC
PA14_27550	2392254..2392273	yes	TATGAGGACGAATCTCCCGCTTATA	TAGTTGGTGGGTTTCCCTACCGTGT	GGTCTCG	tata	GGCGGGGATCAGCCTTGGCG	gttt	tgagacc	GGTACAGTAAGTGAGAATCCTCTCT	GGTCTTGACAAACGTGTGCTTGTAC
PA14_27560	2392385..2392404	yes	TATGAGGACGAATCTCCCGCTTATA	TAGTTGGTGGGTTTCCCTACCGTGT	GGTCTCG	tata	GGCAAGAAAATCGCTCAATC	gttt	tgagacc	GGTACAGTAAGTGAGAATCCTCTCT	GGTCTTGACAAACGTGTGCTTGTAC
PA14_27570	2393290..2393309	yes	TATGAGGACGAATCTCCCGCTTATA	TAGTTGGTGGGTTTCCCTACCGTGT	GGTCTCG	tata	CAGGGCGTAGCCGGCCAGCC	gttt	tgagacc	GGTACAGTAAGTGAGAATCCTCTCT	GGTCTTGACAAACGTGTGCTTGTAC
PA14_27580	2394389..2394408	yes	TATGAGGACGAATCTCCCGCTTATA	TAGTTGGTGGGTTTCCCTACCGTGT	GGTCTCG	tata	GCGGGGCTCCGTAGAGTGTC	gttt	tgagacc	GGTACAGTAAGTGAGAATCCTCTCT	GGTCTTGACAAACGTGTGCTTGTAC
PA14_27590	2395223..2395242	yes	TATGAGGACGAATCTCCCGCTTATA	TAGTTGGTGGGTTTCCCTACCGTGT	GGTCTCG	tata	ATGAGGGCGGTAATGAGGAG	gttt	tgagacc	GGTACAGTAAGTGAGAATCCTCTCT	GGTCTTGACAAACGTGTGCTTGTAC
PA14_27600,PA14_23580,NA	2395474..2395493,2053494..2053513,2053203..2053222	no	TATGAGGACGAATCTCCCGCTTATA	TAGTTGGTGGGTTTCCCTACCGTGT	GGTCTCG	tata	TCCTAGGCCACTAGACGAAG	gttt	tgagacc	GGTACAGTAAGTGAGAATCCTCTCT	GGTCTTGACAAACGTGTGCTTGTAC
PA14_30680,PA14_27620,PA14_27610	2658670..2658689,2395739..2395758,2395579..2395598	no	TATGAGGACGAATCTCCCGCTTATA	TAGTTGGTGGGTTTCCCTACCGTGT	GGTCTCG	tata	TCGCGACCCCGACCTTGGCA	gttt	tgagacc	GGTACAGTAAGTGAGAATCCTCTCT	GGTCTTGACAAACGTGTGCTTGTAC
PA14_30680,PA14_27620,PA14_27610	2658670..2658689,2395739..2395758,2395579..2395598	no	TATGAGGACGAATCTCCCGCTTATA	TAGTTGGTGGGTTTCCCTACCGTGT	GGTCTCG	tata	TCGCGACCCCGACCTTGGCA	gttt	tgagacc	GGTACAGTAAGTGAGAATCCTCTCT	GGTCTTGACAAACGTGTGCTTGTAC
PA14_27630	2396282..2396301	yes	TATGAGGACGAATCTCCCGCTTATA	TAGTTGGTGGGTTTCCCTACCGTGT	GGTCTCG	tata	TCTGGTTGTTTACTGCGGTT	gttt	tgagacc	GGTACAGTAAGTGAGAATCCTCTCT	GGTCTTGACAAACGTGTGCTTGTAC
PA14_27640	2396664..2396683	yes	TATGAGGACGAATCTCCCGCTTATA	TAGTTGGTGGGTTTCCCTACCGTGT	GGTCTCG	tata	ATCTGGTCGTTGACTGCGGT	gttt	tgagacc	GGTACAGTAAGTGAGAATCCTCTCT	GGTCTTGACAAACGTGTGCTTGTAC
PA14_27650	2397334..2397353	yes	TATGAGGACGAATCTCCCGCTTATA	TAGTTGGTGGGTTTCCCTACCGTGT	GGTCTCG	tata	TCAGCCAGCGTTGCGCCAGC	gttt	tgagacc	GGTACAGTAAGTGAGAATCCTCTCT	GGTCTTGACAAACGTGTGCTTGTAC
PA14_27660	2397643..2397662	yes	TATGAGGACGAATCTCCCGCTTATA	TAGTTGGTGGGTTTCCCTACCGTGT	GGTCTCG	tata	TGCCTTGACCTGGGTGACGA	gttt	tgagacc	GGTACAGTAAGTGAGAATCCTCTCT	GGTCTTGACAAACGTGTGCTTGTAC
PA14_27675	2400028..2400047	yes	TATGAGGACGAATCTCCCGCTTATA	TAGTTGGTGGGTTTCCCTACCGTGT	GGTCTCG	tata	CGGTTCTTCCAGCTTGAAAT	gttt	tgagacc	GGTACAGTAAGTGAGAATCCTCTCT	GGTCTTGACAAACGTGTGCTTGTAC
PA14_27680	2400693..2400712	yes	TATGAGGACGAATCTCCCGCTTATA	TAGTTGGTGGGTTTCCCTACCGTGT	GGTCTCG	tata	GGATGGCGCGGGCGCGGGCG	gttt	tgagacc	GGTACAGTAAGTGAGAATCCTCTCT	GGTCTTGACAAACGTGTGCTTGTAC
PA14_27690	2401641..2401660	yes	TATGAGGACGAATCTCCCGCTTATA	TAGTTGGTGGGTTTCCCTACCGTGT	GGTCTCG	tata	TCGTTGCCGCCTGGCTGATT	gttt	tgagacc	GGTACAGTAAGTGAGAATCCTCTCT	GGTCTTGACAAACGTGTGCTTGTAC
PA14_27700	2402415..2402434	yes	TATGAGGACGAATCTCCCGCTTATA	TAGTTGGTGGGTTTCCCTACCGTGT	GGTCTCG	tata	GGGTGTAGTGGCGTGAACAG	gttt	tgagacc	GGTACAGTAAGTGAGAATCCTCTCT	GGTCTTGACAAACGTGTGCTTGTAC
PA14_27710	2403111..2403130	yes	TATGAGGACGAATCTCCCGCTTATA	TAGTTGGTGGGTTTCCCTACCGTGT	GGTCTCG	tata	GTGGTGCTCGAGGTAGGAGT	gttt	tgagacc	GGTACAGTAAGTGAGAATCCTCTCT	GGTCTTGACAAACGTGTGCTTGTAC
PA14_27720	2403535..2403554	yes	TATGAGGACGAATCTCCCGCTTATA	TAGTTGGTGGGTTTCCCTACCGTGT	GGTCTCG	tata	GAGAAACGAGGCTGCCAGGC	gttt	tgagacc	GGTACAGTAAGTGAGAATCCTCTCT	GGTCTTGACAAACGTGTGCTTGTAC
PA14_27730	2406081..2406100	yes	TATGAGGACGAATCTCCCGCTTATA	TAGTTGGTGGGTTTCCCTACCGTGT	GGTCTCG	tata	AGCGGGTGGGGTACGCCGAT	gttt	tgagacc	GGTACAGTAAGTGAGAATCCTCTCT	GGTCTTGACAAACGTGTGCTTGTAC
PA14_27740	2406315..2406334	yes	TATGAGGACGAATCTCCCGCTTATA	TAGTTGGTGGGTTTCCCTACCGTGT	GGTCTCG	tata	GAAGCGGCCGGATTGTAGGT	gttt	tgagacc	GGTACAGTAAGTGAGAATCCTCTCT	GGTCTTGACAAACGTGTGCTTGTAC
PA14_27755	2407101..2407120	yes	TATGAGGACGAATCTCCCGCTTATA	TAGTTGGTGGGTTTCCCTACCGTGT	GGTCTCG	tata	CGAGTTCTTCCGGCCCCAGA	gttt	tgagacc	GGTACAGTAAGTGAGAATCCTCTCT	GGTCTTGACAAACGTGTGCTTGTAC
PA14_27770	2407797..2407816	yes	TATGAGGACGAATCTCCCGCTTATA	TAGTTGGTGGGTTTCCCTACCGTGT	GGTCTCG	tata	CAATTGACGGATGGACAGGG	gttt	tgagacc	GGTACAGTAAGTGAGAATCCTCTCT	GGTCTTGACAAACGTGTGCTTGTAC
PA14_27780	2408742..2408761	yes	TATGAGGACGAATCTCCCGCTTATA	TAGTTGGTGGGTTTCCCTACCGTGT	GGTCTCG	tata	CGATGGTGTTCAGGGCGACC	gttt	tgagacc	GGTACAGTAAGTGAGAATCCTCTCT	GGTCTTGACAAACGTGTGCTTGTAC
PA14_27800	2410847..2410866	yes	TATGAGGACGAATCTCCCGCTTATA	TAGTTGGTGGGTTTCCCTACCGTGT	GGTCTCG	tata	GGACATCCGCGAGCCGAACC	gttt	tgagacc	GGTACAGTAAGTGAGAATCCTCTCT	GGTCTTGACAAACGTGTGCTTGTAC
PA14_27810	2411504..2411523	yes	TATGAGGACGAATCTCCCGCTTATA	TAGTTGGTGGGTTTCCCTACCGTGT	GGTCTCG	tata	CGCAGGTACTGGCCGATGCG	gttt	tgagacc	GGTACAGTAAGTGAGAATCCTCTCT	GGTCTTGACAAACGTGTGCTTGTAC
PA14_27830	2411689..2411708	yes	TATGAGGACGAATCTCCCGCTTATA	TAGTTGGTGGGTTTCCCTACCGTGT	GGTCTCG	tata	AGCGAGGGTGGAGGCAGTGA	gttt	tgagacc	GGTACAGTAAGTGAGAATCCTCTCT	GGTCTTGACAAACGTGTGCTTGTAC
PA14_27840	2412050..2412069	yes	TATGAGGACGAATCTCCCGCTTATA	TAGTTGGTGGGTTTCCCTACCGTGT	GGTCTCG	tata	GCGCCTGCCGGCTGGCTGTC	gttt	tgagacc	GGTACAGTAAGTGAGAATCCTCTCT	GGTCTTGACAAACGTGTGCTTGTAC
PA14_27850	2412789..2412808	yes	TATGAGGACGAATCTCCCGCTTATA	TAGTTGGTGGGTTTCCCTACCGTGT	GGTCTCG	tata	CCCAGCGGCGAATGTTCGGC	gttt	tgagacc	GGTACAGTAAGTGAGAATCCTCTCT	GGTCTTGACAAACGTGTGCTTGTAC
PA14_27870	2413912..2413931	yes	TATGAGGACGAATCTCCCGCTTATA	TAGTTGGTGGGTTTCCCTACCGTGT	GGTCTCG	tata	TCGCGCAGCAGACTCTCTTT	gttt	tgagacc	GGTACAGTAAGTGAGAATCCTCTCT	GGTCTTGACAAACGTGTGCTTGTAC
PA14_27880	2414565..2414584	yes	TATGAGGACGAATCTCCCGCTTATA	TAGTTGGTGGGTTTCCCTACCGTGT	GGTCTCG	tata	CGAGAAAGCGGTGACGGGCG	gttt	tgagacc	GGTACAGTAAGTGAGAATCCTCTCT	GGTCTTGACAAACGTGTGCTTGTAC
PA14_27890	2415307..2415326	yes	TATGAGGACGAATCTCCCGCTTATA	TAGTTGGTGGGTTTCCCTACCGTGT	GGTCTCG	tata	CGCGGGAGTTGGTCGGAGCT	gttt	tgagacc	GGTACAGTAAGTGAGAATCCTCTCT	GGTCTTGACAAACGTGTGCTTGTAC
PA14_27900	2415472..2415491	yes	TATGAGGACGAATCTCCCGCTTATA	TAGTTGGTGGGTTTCCCTACCGTGT	GGTCTCG	tata	TACTGACGAGATTGATCGAC	gttt	tgagacc	GGTACAGTAAGTGAGAATCCTCTCT	GGTCTTGACAAACGTGTGCTTGTAC
PA14_27910	2416541..2416560	yes	TATGAGGACGAATCTCCCGCTTATA	TAGTTGGTGGGTTTCCCTACCGTGT	GGTCTCG	tata	GCCCCAGCGCACCGGGATAT	gttt	tgagacc	GGTACAGTAAGTGAGAATCCTCTCT	GGTCTTGACAAACGTGTGCTTGTAC
PA14_27920	2416704..2416723	yes	TATGAGGACGAATCTCCCGCTTATA	TAGTTGGTGGGTTTCCCTACCGTGT	GGTCTCG	tata	TTCGATCCAGTTCACGCCGC	gttt	tgagacc	GGTACAGTAAGTGAGAATCCTCTCT	GGTCTTGACAAACGTGTGCTTGTAC
PA14_27930	2417727..2417746	yes	TATGAGGACGAATCTCCCGCTTATA	TAGTTGGTGGGTTTCCCTACCGTGT	GGTCTCG	tata	TCGCTGTAGTTGTGCTCGAT	gttt	tgagacc	GGTACAGTAAGTGAGAATCCTCTCT	GGTCTTGACAAACGTGTGCTTGTAC
PA14_27940	2418063..2418082	yes	TATGAGGACGAATCTCCCGCTTATA	TAGTTGGTGGGTTTCCCTACCGTGT	GGTCTCG	tata	TGTCTTCCAAGTAGGCAGCG	gttt	tgagacc	GGTACAGTAAGTGAGAATCCTCTCT	GGTCTTGACAAACGTGTGCTTGTAC
PA14_27950	2419192..2419211	yes	TATGAGGACGAATCTCCCGCTTATA	TAGTTGGTGGGTTTCCCTACCGTGT	GGTCTCG	tata	TTCGGCAAACTGGATTTTAC	gttt	tgagacc	GGTACAGTAAGTGAGAATCCTCTCT	GGTCTTGACAAACGTGTGCTTGTAC
PA14_27960	2420617..2420636	yes	TATGAGGACGAATCTCCCGCTTATA	TAGTTGGTGGGTTTCCCTACCGTGT	GGTCTCG	tata	GCCGGTGTCGGCGACCACCG	gttt	tgagacc	GGTACAGTAAGTGAGAATCCTCTCT	GGTCTTGACAAACGTGTGCTTGTAC
PA14_27980	2421724..2421743	yes	TATGAGGACGAATCTCCCGCTTATA	TAGTTGGTGGGTTTCCCTACCGTGT	GGTCTCG	tata	CGGGGGTGGTAGTCGGTTCT	gttt	tgagacc	GGTACAGTAAGTGAGAATCCTCTCT	GGTCTTGACAAACGTGTGCTTGTAC
PA14_27990	2422078..2422097	yes	TATGAGGACGAATCTCCCGCTTATA	TAGTTGGTGGGTTTCCCTACCGTGT	GGTCTCG	tata	GCCTTTCCCACTAACCGATG	gttt	tgagacc	GGTACAGTAAGTGAGAATCCTCTCT	GGTCTTGACAAACGTGTGCTTGTAC
PA14_28000	2423825..2423844	yes	TATGAGGACGAATCTCCCGCTTATA	TAGTTGGTGGGTTTCCCTACCGTGT	GGTCTCG	tata	GGAAAGGGTAAAACGCGGGC	gttt	tgagacc	GGTACAGTAAGTGAGAATCCTCTCT	GGTCTTGACAAACGTGTGCTTGTAC
PA14_28010	2424957..2424976	yes	TATGAGGACGAATCTCCCGCTTATA	TAGTTGGTGGGTTTCCCTACCGTGT	GGTCTCG	tata	CAGCCAAGTCACGGCACTGC	gttt	tgagacc	GGTACAGTAAGTGAGAATCCTCTCT	GGTCTTGACAAACGTGTGCTTGTAC
PA14_28020	2425639..2425658	yes	TATGAGGACGAATCTCCCGCTTATA	TAGTTGGTGGGTTTCCCTACCGTGT	GGTCTCG	tata	GGCTGAGCCCCAGGCTGATG	gttt	tgagacc	GGTACAGTAAGTGAGAATCCTCTCT	GGTCTTGACAAACGTGTGCTTGTAC
PA14_28030	2426458..2426477	yes	TATGAGGACGAATCTCCCGCTTATA	TAGTTGGTGGGTTTCCCTACCGTGT	GGTCTCG	tata	GTGCCTGCCCATCCTACGCG	gttt	tgagacc	GGTACAGTAAGTGAGAATCCTCTCT	GGTCTTGACAAACGTGTGCTTGTAC
PA14_28040	2427985..2428004	yes	TATGAGGACGAATCTCCCGCTTATA	TAGTTGGTGGGTTTCCCTACCGTGT	GGTCTCG	tata	TCAGGGGAAGAGGGGCGACG	gttt	tgagacc	GGTACAGTAAGTGAGAATCCTCTCT	GGTCTTGACAAACGTGTGCTTGTAC
PA14_28050	2428275..2428294	yes	TATGAGGACGAATCTCCCGCTTATA	TAGTTGGTGGGTTTCCCTACCGTGT	GGTCTCG	tata	CAGAATCCGATCGAACACCC	gttt	tgagacc	GGTACAGTAAGTGAGAATCCTCTCT	GGTCTTGACAAACGTGTGCTTGTAC
PA14_28060	2431082..2431101	yes	TATGAGGACGAATCTCCCGCTTATA	TAGTTGGTGGGTTTCCCTACCGTGT	GGTCTCG	tata	CAAGAGGCGGGGCAGGCGGC	gttt	tgagacc	GGTACAGTAAGTGAGAATCCTCTCT	GGTCTTGACAAACGTGTGCTTGTAC
PA14_28070	2431613..2431632	yes	TATGAGGACGAATCTCCCGCTTATA	TAGTTGGTGGGTTTCCCTACCGTGT	GGTCTCG	tata	CAGGGATTCGAATCGTTCGG	gttt	tgagacc	GGTACAGTAAGTGAGAATCCTCTCT	GGTCTTGACAAACGTGTGCTTGTAC
PA14_28080	2431953..2431972	yes	TATGAGGACGAATCTCCCGCTTATA	TAGTTGGTGGGTTTCCCTACCGTGT	GGTCTCG	tata	ACGTCCAGCCTGATTTCGAT	gttt	tgagacc	GGTACAGTAAGTGAGAATCCTCTCT	GGTCTTGACAAACGTGTGCTTGTAC
PA14_28090	2432511..2432530	yes	TATGAGGACGAATCTCCCGCTTATA	TAGTTGGTGGGTTTCCCTACCGTGT	GGTCTCG	tata	GGCGGCTGTAGCCGGCCAGG	gttt	tgagacc	GGTACAGTAAGTGAGAATCCTCTCT	GGTCTTGACAAACGTGTGCTTGTAC
PA14_28100	2434491..2434510	yes	TATGAGGACGAATCTCCCGCTTATA	TAGTTGGTGGGTTTCCCTACCGTGT	GGTCTCG	tata	GGCTAGGGTGGAGCAGAGCA	gttt	tgagacc	GGTACAGTAAGTGAGAATCCTCTCT	GGTCTTGACAAACGTGTGCTTGTAC
PA14_28110	2435234..2435253	yes	TATGAGGACGAATCTCCCGCTTATA	TAGTTGGTGGGTTTCCCTACCGTGT	GGTCTCG	tata	GGCTGCGTAGATCCATGTCT	gttt	tgagacc	GGTACAGTAAGTGAGAATCCTCTCT	GGTCTTGACAAACGTGTGCTTGTAC
PA14_28120	2436026..2436045	yes	TATGAGGACGAATCTCCCGCTTATA	TAGTTGGTGGGTTTCCCTACCGTGT	GGTCTCG	tata	ACGCAGGGCCATTATGGCGG	gttt	tgagacc	GGTACAGTAAGTGAGAATCCTCTCT	GGTCTTGACAAACGTGTGCTTGTAC
PA14_28130	2436388..2436407	yes	TATGAGGACGAATCTCCCGCTTATA	TAGTTGGTGGGTTTCCCTACCGTGT	GGTCTCG	tata	GATTCTTGCGGCTTTTAGCC	gttt	tgagacc	GGTACAGTAAGTGAGAATCCTCTCT	GGTCTTGACAAACGTGTGCTTGTAC
PA14_28140	2436854..2436873	yes	TATGAGGACGAATCTCCCGCTTATA	TAGTTGGTGGGTTTCCCTACCGTGT	GGTCTCG	tata	CTGCCAGGACGGCAGCGACA	gttt	tgagacc	GGTACAGTAAGTGAGAATCCTCTCT	GGTCTTGACAAACGTGTGCTTGTAC
PA14_28150	2437316..2437335	yes	TATGAGGACGAATCTCCCGCTTATA	TAGTTGGTGGGTTTCCCTACCGTGT	GGTCTCG	tata	TCGCGCAGCTCCACCCGTGC	gttt	tgagacc	GGTACAGTAAGTGAGAATCCTCTCT	GGTCTTGACAAACGTGTGCTTGTAC
PA14_28170	2438277..2438296	yes	TATGAGGACGAATCTCCCGCTTATA	TAGTTGGTGGGTTTCCCTACCGTGT	GGTCTCG	tata	AGTCGAAGTCTGCTTGTCGT	gttt	tgagacc	GGTACAGTAAGTGAGAATCCTCTCT	GGTCTTGACAAACGTGTGCTTGTAC
PA14_28180	2440535..2440554	yes	TATGAGGACGAATCTCCCGCTTATA	TAGTTGGTGGGTTTCCCTACCGTGT	GGTCTCG	tata	GAGGAGGGGTAGGGGGTGTG	gttt	tgagacc	GGTACAGTAAGTGAGAATCCTCTCT	GGTCTTGACAAACGTGTGCTTGTAC
PA14_28190	2440774..2440793	yes	TATGAGGACGAATCTCCCGCTTATA	TAGTTGGTGGGTTTCCCTACCGTGT	GGTCTCG	tata	CGACCCCCACCATGTCAAGG	gttt	tgagacc	GGTACAGTAAGTGAGAATCCTCTCT	GGTCTTGACAAACGTGTGCTTGTAC
PA14_28200	2441022..2441041	yes	TATGAGGACGAATCTCCCGCTTATA	TAGTTGGTGGGTTTCCCTACCGTGT	GGTCTCG	tata	GCCGATACGCGAACCGGAAG	gttt	tgagacc	GGTACAGTAAGTGAGAATCCTCTCT	GGTCTTGACAAACGTGTGCTTGTAC
PA14_28210	2441469..2441488	yes	TATGAGGACGAATCTCCCGCTTATA	TAGTTGGTGGGTTTCCCTACCGTGT	GGTCTCG	tata	TCGTTGAGGGGCAAGGGAAT	gttt	tgagacc	GGTACAGTAAGTGAGAATCCTCTCT	GGTCTTGACAAACGTGTGCTTGTAC
PA14_28220	2442247..2442266	yes	TATGAGGACGAATCTCCCGCTTATA	TAGTTGGTGGGTTTCCCTACCGTGT	GGTCTCG	tata	CCCTCCGGGCATGATCAACC	gttt	tgagacc	GGTACAGTAAGTGAGAATCCTCTCT	GGTCTTGACAAACGTGTGCTTGTAC
PA14_28230	2442918..2442937	yes	TATGAGGACGAATCTCCCGCTTATA	TAGTTGGTGGGTTTCCCTACCGTGT	GGTCTCG	tata	AGAAGAACAGGCCGATGTGC	gttt	tgagacc	GGTACAGTAAGTGAGAATCCTCTCT	GGTCTTGACAAACGTGTGCTTGTAC
PA14_28240	2443135..2443154	yes	TATGAGGACGAATCTCCCGCTTATA	TAGTTGGTGGGTTTCCCTACCGTGT	GGTCTCG	tata	GGTGGTCGTGCTCGGGCTCG	gttt	tgagacc	GGTACAGTAAGTGAGAATCCTCTCT	GGTCTTGACAAACGTGTGCTTGTAC
PA14_28250	2444476..2444495	yes	TATGAGGACGAATCTCCCGCTTATA	TAGTTGGTGGGTTTCCCTACCGTGT	GGTCTCG	tata	GCCGACTATCCTGGCAAGTG	gttt	tgagacc	GGTACAGTAAGTGAGAATCCTCTCT	GGTCTTGACAAACGTGTGCTTGTAC
PA14_28260	2444565..2444584	yes	TATGAGGACGAATCTCCCGCTTATA	TAGTTGGTGGGTTTCCCTACCGTGT	GGTCTCG	tata	CGCCTTGCGCATCTGTTCTT	gttt	tgagacc	GGTACAGTAAGTGAGAATCCTCTCT	GGTCTTGACAAACGTGTGCTTGTAC
PA14_28280	2444934..2444953	yes	TATGAGGACGAATCTCCCGCTTATA	TAGTTGGTGGGTTTCCCTACCGTGT	GGTCTCG	tata	TGTCGGCGAATGCGTCGACC	gttt	tgagacc	GGTACAGTAAGTGAGAATCCTCTCT	GGTCTTGACAAACGTGTGCTTGTAC
PA14_28290	2445721..2445740	yes	TATGAGGACGAATCTCCCGCTTATA	TAGTTGGTGGGTTTCCCTACCGTGT	GGTCTCG	tata	CCCACGCCTACCTGCGGTGC	gttt	tgagacc	GGTACAGTAAGTGAGAATCCTCTCT	GGTCTTGACAAACGTGTGCTTGTAC
PA14_28300	2446718..2446737	yes	TATGAGGACGAATCTCCCGCTTATA	TAGTTGGTGGGTTTCCCTACCGTGT	GGTCTCG	tata	GGCGGAAACCGGGGAAGGGG	gttt	tgagacc	GGTACAGTAAGTGAGAATCCTCTCT	GGTCTTGACAAACGTGTGCTTGTAC
PA14_28310	2447687..2447706	yes	TATGAGGACGAATCTCCCGCTTATA	TAGTTGGTGGGTTTCCCTACCGTGT	GGTCTCG	tata	TGTTCTATGCGCAGGTGTCG	gttt	tgagacc	GGTACAGTAAGTGAGAATCCTCTCT	GGTCTTGACAAACGTGTGCTTGTAC
PA14_28320	2447824..2447843	yes	TATGAGGACGAATCTCCCGCTTATA	TAGTTGGTGGGTTTCCCTACCGTGT	GGTCTCG	tata	CGGGTGGCCTGTTTCTGTTC	gttt	tgagacc	GGTACAGTAAGTGAGAATCCTCTCT	GGTCTTGACAAACGTGTGCTTGTAC
PA14_28330	2448459..2448478	yes	TATGAGGACGAATCTCCCGCTTATA	TAGTTGGTGGGTTTCCCTACCGTGT	GGTCTCG	tata	CTTGGCGAGTTCGAGATGAT	gttt	tgagacc	GGTACAGTAAGTGAGAATCCTCTCT	GGTCTTGACAAACGTGTGCTTGTAC
PA14_28340	2448768..2448787	yes	TATGAGGACGAATCTCCCGCTTATA	TAGTTGGTGGGTTTCCCTACCGTGT	GGTCTCG	tata	GGAATCGGGGTGAGAATGCC	gttt	tgagacc	GGTACAGTAAGTGAGAATCCTCTCT	GGTCTTGACAAACGTGTGCTTGTAC
PA14_28350	2450344..2450363	yes	TATGAGGACGAATCTCCCGCTTATA	TAGTTGGTGGGTTTCCCTACCGTGT	GGTCTCG	tata	GGACCAGGATGATCGCAGGC	gttt	tgagacc	GGTACAGTAAGTGAGAATCCTCTCT	GGTCTTGACAAACGTGTGCTTGTAC
PA14_28360	2450737..2450756	yes	TATGAGGACGAATCTCCCGCTTATA	TAGTTGGTGGGTTTCCCTACCGTGT	GGTCTCG	tata	GCAGGATCAGCAGGCCGTAG	gttt	tgagacc	GGTACAGTAAGTGAGAATCCTCTCT	GGTCTTGACAAACGTGTGCTTGTAC
PA14_28370	2451413..2451432	yes	TATGAGGACGAATCTCCCGCTTATA	TAGTTGGTGGGTTTCCCTACCGTGT	GGTCTCG	tata	GATGAACTTGCACAAGCGCG	gttt	tgagacc	GGTACAGTAAGTGAGAATCCTCTCT	GGTCTTGACAAACGTGTGCTTGTAC
PA14_28380	2451728..2451747	yes	TATGAGGACGAATCTCCCGCTTATA	TAGTTGGTGGGTTTCCCTACCGTGT	GGTCTCG	tata	GGGACAGGTATCGCGCAGTA	gttt	tgagacc	GGTACAGTAAGTGAGAATCCTCTCT	GGTCTTGACAAACGTGTGCTTGTAC
PA14_28390	2452467..2452486	yes	TATGAGGACGAATCTCCCGCTTATA	TAGTTGGTGGGTTTCCCTACCGTGT	GGTCTCG	tata	TTGTCGATATCGATAAGCAA	gttt	tgagacc	GGTACAGTAAGTGAGAATCCTCTCT	GGTCTTGACAAACGTGTGCTTGTAC
PA14_28400	2453859..2453878	yes	TATGAGGACGAATCTCCCGCTTATA	TAGTTGGTGGGTTTCCCTACCGTGT	GGTCTCG	tata	TCGCGATGCCCAGTGCCAGC	gttt	tgagacc	GGTACAGTAAGTGAGAATCCTCTCT	GGTCTTGACAAACGTGTGCTTGTAC
PA14_28410	2454294..2454313	yes	TATGAGGACGAATCTCCCGCTTATA	TAGTTGGTGGGTTTCCCTACCGTGT	GGTCTCG	tata	ACAGGCGGAGAGGGCCAGGG	gttt	tgagacc	GGTACAGTAAGTGAGAATCCTCTCT	GGTCTTGACAAACGTGTGCTTGTAC
PA14_28420	2455646..2455665	yes	TATGAGGACGAATCTCCCGCTTATA	TAGTTGGTGGGTTTCCCTACCGTGT	GGTCTCG	tata	GAACAGCTCGATGGTATCGC	gttt	tgagacc	GGTACAGTAAGTGAGAATCCTCTCT	GGTCTTGACAAACGTGTGCTTGTAC
PA14_28430	2455818..2455837	yes	TATGAGGACGAATCTCCCGCTTATA	TAGTTGGTGGGTTTCCCTACCGTGT	GGTCTCG	tata	CATCCCGATCAATTCGTAGG	gttt	tgagacc	GGTACAGTAAGTGAGAATCCTCTCT	GGTCTTGACAAACGTGTGCTTGTAC
PA14_28440	2456427..2456446	yes	TATGAGGACGAATCTCCCGCTTATA	TAGTTGGTGGGTTTCCCTACCGTGT	GGTCTCG	tata	CGAACAACCCGCCAGCAAGA	gttt	tgagacc	GGTACAGTAAGTGAGAATCCTCTCT	GGTCTTGACAAACGTGTGCTTGTAC
PA14_28450	2457278..2457297	yes	TATGAGGACGAATCTCCCGCTTATA	TAGTTGGTGGGTTTCCCTACCGTGT	GGTCTCG	tata	GGAAAGAGCGGCAACGCCGG	gttt	tgagacc	GGTACAGTAAGTGAGAATCCTCTCT	GGTCTTGACAAACGTGTGCTTGTAC
PA14_28460	2457869..2457888	yes	TATGAGGACGAATCTCCCGCTTATA	TAGTTGGTGGGTTTCCCTACCGTGT	GGTCTCG	tata	GTTGGAAAAGGTGTGCGGGC	gttt	tgagacc	GGTACAGTAAGTGAGAATCCTCTCT	GGTCTTGACAAACGTGTGCTTGTAC
PA14_28470	2458084..2458103	yes	TATGAGGACGAATCTCCCGCTTATA	TAGTTGGTGGGTTTCCCTACCGTGT	GGTCTCG	tata	CAGCACGGCGACTTCGATTC	gttt	tgagacc	GGTACAGTAAGTGAGAATCCTCTCT	GGTCTTGACAAACGTGTGCTTGTAC
PA14_28490	2458634..2458653	yes	TATGAGGACGAATCTCCCGCTTATA	TAGTTGGTGGGTTTCCCTACCGTGT	GGTCTCG	tata	CTGCTTGGCGCGAGCGGAGC	gttt	tgagacc	GGTACAGTAAGTGAGAATCCTCTCT	GGTCTTGACAAACGTGTGCTTGTAC
PA14_28500	2459123..2459142	yes	TATGAGGACGAATCTCCCGCTTATA	TAGTTGGTGGGTTTCCCTACCGTGT	GGTCTCG	tata	GAGGCGAGATGCAGATGGCC	gttt	tgagacc	GGTACAGTAAGTGAGAATCCTCTCT	GGTCTTGACAAACGTGTGCTTGTAC
PA14_28510	2459308..2459327	yes	TATGAGGACGAATCTCCCGCTTATA	TAGTTGGTGGGTTTCCCTACCGTGT	GGTCTCG	tata	GAGGAACAGCCCGGCGTACG	gttt	tgagacc	GGTACAGTAAGTGAGAATCCTCTCT	GGTCTTGACAAACGTGTGCTTGTAC
PA14_28520	2459802..2459821	yes	TATGAGGACGAATCTCCCGCTTATA	TAGTTGGTGGGTTTCCCTACCGTGT	GGTCTCG	tata	AGGCCCCGGGGGCGATGAGG	gttt	tgagacc	GGTACAGTAAGTGAGAATCCTCTCT	GGTCTTGACAAACGTGTGCTTGTAC
PA14_28530	2461067..2461086	yes	TATGAGGACGAATCTCCCGCTTATA	TAGTTGGTGGGTTTCCCTACCGTGT	GGTCTCG	tata	CTATTTCCCGATAAGCCGTA	gttt	tgagacc	GGTACAGTAAGTGAGAATCCTCTCT	GGTCTTGACAAACGTGTGCTTGTAC
PA14_28540	2461331..2461350	yes	TATGAGGACGAATCTCCCGCTTATA	TAGTTGGTGGGTTTCCCTACCGTGT	GGTCTCG	tata	AGGCAGCGGCGATTTTCTTC	gttt	tgagacc	GGTACAGTAAGTGAGAATCCTCTCT	GGTCTTGACAAACGTGTGCTTGTAC
PA14_28560	2462309..2462328	yes	TATGAGGACGAATCTCCCGCTTATA	TAGTTGGTGGGTTTCCCTACCGTGT	GGTCTCG	tata	GCGGCAACAGGGCGAGGGTG	gttt	tgagacc	GGTACAGTAAGTGAGAATCCTCTCT	GGTCTTGACAAACGTGTGCTTGTAC
PA14_28570	2463042..2463061	yes	TATGAGGACGAATCTCCCGCTTATA	TAGTTGGTGGGTTTCCCTACCGTGT	GGTCTCG	tata	GAAAAGGCCTACAAACAAAC	gttt	tgagacc	GGTACAGTAAGTGAGAATCCTCTCT	GGTCTTGACAAACGTGTGCTTGTAC
PA14_28580	2463236..2463255	yes	TATGAGGACGAATCTCCCGCTTATA	TAGTTGGTGGGTTTCCCTACCGTGT	GGTCTCG	tata	ATTGCTCGGAAATCTTCACC	gttt	tgagacc	GGTACAGTAAGTGAGAATCCTCTCT	GGTCTTGACAAACGTGTGCTTGTAC
PA14_28590	2463472..2463491	yes	TATGAGGACGAATCTCCCGCTTATA	TAGTTGGTGGGTTTCCCTACCGTGT	GGTCTCG	tata	CGCCGGCCACGCTCATGCGC	gttt	tgagacc	GGTACAGTAAGTGAGAATCCTCTCT	GGTCTTGACAAACGTGTGCTTGTAC
PA14_28600	2464727..2464746	yes	TATGAGGACGAATCTCCCGCTTATA	TAGTTGGTGGGTTTCCCTACCGTGT	GGTCTCG	tata	GGCATCGAACAGCATCTTGA	gttt	tgagacc	GGTACAGTAAGTGAGAATCCTCTCT	GGTCTTGACAAACGTGTGCTTGTAC
PA14_28610	2465475..2465494	yes	TATGAGGACGAATCTCCCGCTTATA	TAGTTGGTGGGTTTCCCTACCGTGT	GGTCTCG	tata	AGCAATGTGACGAAGGATTC	gttt	tgagacc	GGTACAGTAAGTGAGAATCCTCTCT	GGTCTTGACAAACGTGTGCTTGTAC
PA14_28620	2465883..2465902	yes	TATGAGGACGAATCTCCCGCTTATA	TAGTTGGTGGGTTTCCCTACCGTGT	GGTCTCG	tata	CGGAATAGCTCGTAGAAGAT	gttt	tgagacc	GGTACAGTAAGTGAGAATCCTCTCT	GGTCTTGACAAACGTGTGCTTGTAC
PA14_28630	2466125..2466144	yes	TATGAGGACGAATCTCCCGCTTATA	TAGTTGGTGGGTTTCCCTACCGTGT	GGTCTCG	tata	ATACCCATCCACCTCGAACG	gttt	tgagacc	GGTACAGTAAGTGAGAATCCTCTCT	GGTCTTGACAAACGTGTGCTTGTAC
PA14_28650	2467225..2467244	yes	TATGAGGACGAATCTCCCGCTTATA	TAGTTGGTGGGTTTCCCTACCGTGT	GGTCTCG	tata	CCGTCGGGAAGAGTAATGAT	gttt	tgagacc	GGTACAGTAAGTGAGAATCCTCTCT	GGTCTTGACAAACGTGTGCTTGTAC
PA14_28660	2469186..2469205	yes	TATGAGGACGAATCTCCCGCTTATA	TAGTTGGTGGGTTTCCCTACCGTGT	GGTCTCG	tata	TTCTCGTTGATCGGGGGTTT	gttt	tgagacc	GGTACAGTAAGTGAGAATCCTCTCT	GGTCTTGACAAACGTGTGCTTGTAC
PA14_28670	2469760..2469779	yes	TATGAGGACGAATCTCCCGCTTATA	TAGTTGGTGGGTTTCCCTACCGTGT	GGTCTCG	tata	CCACTTTTGGTCTTCATCTT	gttt	tgagacc	GGTACAGTAAGTGAGAATCCTCTCT	GGTCTTGACAAACGTGTGCTTGTAC
PA14_28680	2470003..2470022	yes	TATGAGGACGAATCTCCCGCTTATA	TAGTTGGTGGGTTTCCCTACCGTGT	GGTCTCG	tata	AATTTTCTTGTGACGACGAC	gttt	tgagacc	GGTACAGTAAGTGAGAATCCTCTCT	GGTCTTGACAAACGTGTGCTTGTAC
PA14_28690	2470481..2470500	yes	TATGAGGACGAATCTCCCGCTTATA	TAGTTGGTGGGTTTCCCTACCGTGT	GGTCTCG	tata	CTCCAGGGCATTGACGTCTT	gttt	tgagacc	GGTACAGTAAGTGAGAATCCTCTCT	GGTCTTGACAAACGTGTGCTTGTAC
PA14_28710	2471519..2471538	yes	TATGAGGACGAATCTCCCGCTTATA	TAGTTGGTGGGTTTCCCTACCGTGT	GGTCTCG	tata	AGCTCGTCATGGGAAACCTG	gttt	tgagacc	GGTACAGTAAGTGAGAATCCTCTCT	GGTCTTGACAAACGTGTGCTTGTAC
PA14_28720	2473915..2473934	yes	TATGAGGACGAATCTCCCGCTTATA	TAGTTGGTGGGTTTCCCTACCGTGT	GGTCTCG	tata	CCTTGGCTTCCCGTTTGTTC	gttt	tgagacc	GGTACAGTAAGTGAGAATCCTCTCT	GGTCTTGACAAACGTGTGCTTGTAC
PA14_28720,PA14_28730	2474154..2474173	yes	TATGAGGACGAATCTCCCGCTTATA	TAGTTGGTGGGTTTCCCTACCGTGT	GGTCTCG	tata	GGCAGCTCGTCGTTATGACT	gttt	tgagacc	GGTACAGTAAGTGAGAATCCTCTCT	GGTCTTGACAAACGTGTGCTTGTAC
PA14_28740	2474606..2474625	yes	TATGAGGACGAATCTCCCGCTTATA	TAGTTGGTGGGTTTCCCTACCGTGT	GGTCTCG	tata	CCCCATGCAAGTGCGCTACC	gttt	tgagacc	GGTACAGTAAGTGAGAATCCTCTCT	GGTCTTGACAAACGTGTGCTTGTAC
PA14_28750	2475140..2475159	yes	TATGAGGACGAATCTCCCGCTTATA	TAGTTGGTGGGTTTCCCTACCGTGT	GGTCTCG	tata	GGTGAACTCGGGACCTTGGT	gttt	tgagacc	GGTACAGTAAGTGAGAATCCTCTCT	GGTCTTGACAAACGTGTGCTTGTAC
PA14_28760	2476022..2476041	yes	TATGAGGACGAATCTCCCGCTTATA	TAGTTGGTGGGTTTCCCTACCGTGT	GGTCTCG	tata	GCAGGTCATTTGGCCAACAT	gttt	tgagacc	GGTACAGTAAGTGAGAATCCTCTCT	GGTCTTGACAAACGTGTGCTTGTAC
PA14_28770	2476715..2476734	yes	TATGAGGACGAATCTCCCGCTTATA	TAGTTGGTGGGTTTCCCTACCGTGT	GGTCTCG	tata	ATGAGTCAGCGTCCGCTGAC	gttt	tgagacc	GGTACAGTAAGTGAGAATCCTCTCT	GGTCTTGACAAACGTGTGCTTGTAC
PA14_28780	2478601..2478620	yes	TATGAGGACGAATCTCCCGCTTATA	TAGTTGGTGGGTTTCCCTACCGTGT	GGTCTCG	tata	ACCTCCGGGGGACATACACA	gttt	tgagacc	GGTACAGTAAGTGAGAATCCTCTCT	GGTCTTGACAAACGTGTGCTTGTAC
PA14_28790	2478997..2479016	yes	TATGAGGACGAATCTCCCGCTTATA	TAGTTGGTGGGTTTCCCTACCGTGT	GGTCTCG	tata	CTCAGGAGTCGCCGATTTCT	gttt	tgagacc	GGTACAGTAAGTGAGAATCCTCTCT	GGTCTTGACAAACGTGTGCTTGTAC
PA14_28800	2479293..2479312	yes	TATGAGGACGAATCTCCCGCTTATA	TAGTTGGTGGGTTTCCCTACCGTGT	GGTCTCG	tata	GCGTTAACGTCAACGGTGGC	gttt	tgagacc	GGTACAGTAAGTGAGAATCCTCTCT	GGTCTTGACAAACGTGTGCTTGTAC
PA14_28810	2480418..2480437	yes	TATGAGGACGAATCTCCCGCTTATA	TAGTTGGTGGGTTTCCCTACCGTGT	GGTCTCG	tata	AGGCCCTTGGGTTGAGGAAG	gttt	tgagacc	GGTACAGTAAGTGAGAATCCTCTCT	GGTCTTGACAAACGTGTGCTTGTAC
PA14_28820	2485671..2485690	yes	TATGAGGACGAATCTCCCGCTTATA	TAGTTGGTGGGTTTCCCTACCGTGT	GGTCTCG	tata	ATCAATCCGCCAGACAAATT	gttt	tgagacc	GGTACAGTAAGTGAGAATCCTCTCT	GGTCTTGACAAACGTGTGCTTGTAC
PA14_28830	2488179..2488198	yes	TATGAGGACGAATCTCCCGCTTATA	TAGTTGGTGGGTTTCCCTACCGTGT	GGTCTCG	tata	CGGAACAACACCGGCTCGCA	gttt	tgagacc	GGTACAGTAAGTGAGAATCCTCTCT	GGTCTTGACAAACGTGTGCTTGTAC
PA14_28830,PA14_28840	2489415..2489434	yes	TATGAGGACGAATCTCCCGCTTATA	TAGTTGGTGGGTTTCCCTACCGTGT	GGTCTCG	tata	GTGGACTCAGAGCTGGAAGG	gttt	tgagacc	GGTACAGTAAGTGAGAATCCTCTCT	GGTCTTGACAAACGTGTGCTTGTAC
PA14_28850	2491889..2491908	yes	TATGAGGACGAATCTCCCGCTTATA	TAGTTGGTGGGTTTCCCTACCGTGT	GGTCTCG	tata	TGATCCGAGCCTCTAGCTCC	gttt	tgagacc	GGTACAGTAAGTGAGAATCCTCTCT	GGTCTTGACAAACGTGTGCTTGTAC
PA14_28870	2492068..2492087	yes	TATGAGGACGAATCTCCCGCTTATA	TAGTTGGTGGGTTTCCCTACCGTGT	GGTCTCG	tata	CCCGACGACGTCGAAGACGG	gttt	tgagacc	GGTACAGTAAGTGAGAATCCTCTCT	GGTCTTGACAAACGTGTGCTTGTAC
PA14_28880	2493911..2493930	yes	TATGAGGACGAATCTCCCGCTTATA	TAGTTGGTGGGTTTCCCTACCGTGT	GGTCTCG	tata	GTGACGATTCGTACGACTTT	gttt	tgagacc	GGTACAGTAAGTGAGAATCCTCTCT	GGTCTTGACAAACGTGTGCTTGTAC
PA14_28895	2500199..2500218	yes	TATGAGGACGAATCTCCCGCTTATA	TAGTTGGTGGGTTTCCCTACCGTGT	GGTCTCG	tata	AGCGTTCGCTCTGGCAGTTG	gttt	tgagacc	GGTACAGTAAGTGAGAATCCTCTCT	GGTCTTGACAAACGTGTGCTTGTAC
PA14_28910	2500855..2500874	yes	TATGAGGACGAATCTCCCGCTTATA	TAGTTGGTGGGTTTCCCTACCGTGT	GGTCTCG	tata	CCGGGAAATGCACCCGCGAC	gttt	tgagacc	GGTACAGTAAGTGAGAATCCTCTCT	GGTCTTGACAAACGTGTGCTTGTAC
PA14_28920	2502747..2502766	yes	TATGAGGACGAATCTCCCGCTTATA	TAGTTGGTGGGTTTCCCTACCGTGT	GGTCTCG	tata	GCCACAGCATATTGCCCCGA	gttt	tgagacc	GGTACAGTAAGTGAGAATCCTCTCT	GGTCTTGACAAACGTGTGCTTGTAC
PA14_28930	2503363..2503382	yes	TATGAGGACGAATCTCCCGCTTATA	TAGTTGGTGGGTTTCCCTACCGTGT	GGTCTCG	tata	GAGACGGAGCAGGTAGGGGT	gttt	tgagacc	GGTACAGTAAGTGAGAATCCTCTCT	GGTCTTGACAAACGTGTGCTTGTAC
PA14_28940	2503674..2503693	yes	TATGAGGACGAATCTCCCGCTTATA	TAGTTGGTGGGTTTCCCTACCGTGT	GGTCTCG	tata	GCACCAGTACGGCAAGCGCT	gttt	tgagacc	GGTACAGTAAGTGAGAATCCTCTCT	GGTCTTGACAAACGTGTGCTTGTAC
PA14_28950	2504132..2504151	yes	TATGAGGACGAATCTCCCGCTTATA	TAGTTGGTGGGTTTCCCTACCGTGT	GGTCTCG	tata	CTTGCCGCAGAGGCAGCCGC	gttt	tgagacc	GGTACAGTAAGTGAGAATCCTCTCT	GGTCTTGACAAACGTGTGCTTGTAC
PA14_28960	2504640..2504659	yes	TATGAGGACGAATCTCCCGCTTATA	TAGTTGGTGGGTTTCCCTACCGTGT	GGTCTCG	tata	ACTGTCGTACCAGAGGCAGA	gttt	tgagacc	GGTACAGTAAGTGAGAATCCTCTCT	GGTCTTGACAAACGTGTGCTTGTAC
PA14_28970	2504855..2504874	yes	TATGAGGACGAATCTCCCGCTTATA	TAGTTGGTGGGTTTCCCTACCGTGT	GGTCTCG	tata	GTGGATGGGGGCTGGCGGGA	gttt	tgagacc	GGTACAGTAAGTGAGAATCCTCTCT	GGTCTTGACAAACGTGTGCTTGTAC
PA14_28980	2505390..2505409	yes	TATGAGGACGAATCTCCCGCTTATA	TAGTTGGTGGGTTTCCCTACCGTGT	GGTCTCG	tata	CACCTCGATCTCCAGTTCCA	gttt	tgagacc	GGTACAGTAAGTGAGAATCCTCTCT	GGTCTTGACAAACGTGTGCTTGTAC
PA14_28990	2506769..2506788	yes	TATGAGGACGAATCTCCCGCTTATA	TAGTTGGTGGGTTTCCCTACCGTGT	GGTCTCG	tata	AGCAGCCAGATGCTGCGAGA	gttt	tgagacc	GGTACAGTAAGTGAGAATCCTCTCT	GGTCTTGACAAACGTGTGCTTGTAC
PA14_29000	2508211..2508230	yes	TATGAGGACGAATCTCCCGCTTATA	TAGTTGGTGGGTTTCCCTACCGTGT	GGTCTCG	tata	GACGACGTGCAGGATGCGCT	gttt	tgagacc	GGTACAGTAAGTGAGAATCCTCTCT	GGTCTTGACAAACGTGTGCTTGTAC
PA14_29010	2508784..2508803	yes	TATGAGGACGAATCTCCCGCTTATA	TAGTTGGTGGGTTTCCCTACCGTGT	GGTCTCG	tata	TGTCGCCAGGCCGGTGAGCT	gttt	tgagacc	GGTACAGTAAGTGAGAATCCTCTCT	GGTCTTGACAAACGTGTGCTTGTAC
PA14_29020	2509115..2509134	yes	TATGAGGACGAATCTCCCGCTTATA	TAGTTGGTGGGTTTCCCTACCGTGT	GGTCTCG	tata	TAGATCACCTGGGCGTCGCG	gttt	tgagacc	GGTACAGTAAGTGAGAATCCTCTCT	GGTCTTGACAAACGTGTGCTTGTAC
PA14_29030	2510023..2510042	yes	TATGAGGACGAATCTCCCGCTTATA	TAGTTGGTGGGTTTCCCTACCGTGT	GGTCTCG	tata	GAAGCGTCAGCGTGTCGAAC	gttt	tgagacc	GGTACAGTAAGTGAGAATCCTCTCT	GGTCTTGACAAACGTGTGCTTGTAC
PA14_29040	2511577..2511596	yes	TATGAGGACGAATCTCCCGCTTATA	TAGTTGGTGGGTTTCCCTACCGTGT	GGTCTCG	tata	GCATTCTTCCAGCACGACGA	gttt	tgagacc	GGTACAGTAAGTGAGAATCCTCTCT	GGTCTTGACAAACGTGTGCTTGTAC
PA14_29050	2513898..2513917	yes	TATGAGGACGAATCTCCCGCTTATA	TAGTTGGTGGGTTTCCCTACCGTGT	GGTCTCG	tata	GTCTTCTTCCATTGCGGGGA	gttt	tgagacc	GGTACAGTAAGTGAGAATCCTCTCT	GGTCTTGACAAACGTGTGCTTGTAC
PA14_29060	2514313..2514332	yes	TATGAGGACGAATCTCCCGCTTATA	TAGTTGGTGGGTTTCCCTACCGTGT	GGTCTCG	tata	AGGCTGCGCGCCATCGAACA	gttt	tgagacc	GGTACAGTAAGTGAGAATCCTCTCT	GGTCTTGACAAACGTGTGCTTGTAC
PA14_29070	2515623..2515642	yes	TATGAGGACGAATCTCCCGCTTATA	TAGTTGGTGGGTTTCCCTACCGTGT	GGTCTCG	tata	GAGGCTGGTGCTGGCCAGGC	gttt	tgagacc	GGTACAGTAAGTGAGAATCCTCTCT	GGTCTTGACAAACGTGTGCTTGTAC
PA14_29090	2517155..2517174	yes	TATGAGGACGAATCTCCCGCTTATA	TAGTTGGTGGGTTTCCCTACCGTGT	GGTCTCG	tata	GAGGGTGAGGGAAGCGATGC	gttt	tgagacc	GGTACAGTAAGTGAGAATCCTCTCT	GGTCTTGACAAACGTGTGCTTGTAC
PA14_29100	2517965..2517984	yes	TATGAGGACGAATCTCCCGCTTATA	TAGTTGGTGGGTTTCCCTACCGTGT	GGTCTCG	tata	GAGGGTGGCTACGAAGAGCG	gttt	tgagacc	GGTACAGTAAGTGAGAATCCTCTCT	GGTCTTGACAAACGTGTGCTTGTAC
PA14_29110	2519003..2519022	yes	TATGAGGACGAATCTCCCGCTTATA	TAGTTGGTGGGTTTCCCTACCGTGT	GGTCTCG	tata	GCGCGTTGTCTGCGAAGATG	gttt	tgagacc	GGTACAGTAAGTGAGAATCCTCTCT	GGTCTTGACAAACGTGTGCTTGTAC
PA14_29120	2519170..2519189	yes	TATGAGGACGAATCTCCCGCTTATA	TAGTTGGTGGGTTTCCCTACCGTGT	GGTCTCG	tata	CGCCAGGCTGCCCAGGGGAA	gttt	tgagacc	GGTACAGTAAGTGAGAATCCTCTCT	GGTCTTGACAAACGTGTGCTTGTAC
PA14_29130	2520418..2520437	yes	TATGAGGACGAATCTCCCGCTTATA	TAGTTGGTGGGTTTCCCTACCGTGT	GGTCTCG	tata	GTCGGTGGCGACGTAGGACT	gttt	tgagacc	GGTACAGTAAGTGAGAATCCTCTCT	GGTCTTGACAAACGTGTGCTTGTAC
PA14_29150	2521329..2521348	yes	TATGAGGACGAATCTCCCGCTTATA	TAGTTGGTGGGTTTCCCTACCGTGT	GGTCTCG	tata	CGTAACGTACCGCGCCGCAC	gttt	tgagacc	GGTACAGTAAGTGAGAATCCTCTCT	GGTCTTGACAAACGTGTGCTTGTAC
PA14_29160	2521767..2521786	yes	TATGAGGACGAATCTCCCGCTTATA	TAGTTGGTGGGTTTCCCTACCGTGT	GGTCTCG	tata	CTGCGCGCATTTCGTTGAAC	gttt	tgagacc	GGTACAGTAAGTGAGAATCCTCTCT	GGTCTTGACAAACGTGTGCTTGTAC
PA14_29180	2523064..2523083	yes	TATGAGGACGAATCTCCCGCTTATA	TAGTTGGTGGGTTTCCCTACCGTGT	GGTCTCG	tata	GAGCCAGGTGGCGCGGGAGA	gttt	tgagacc	GGTACAGTAAGTGAGAATCCTCTCT	GGTCTTGACAAACGTGTGCTTGTAC
PA14_29190	2524555..2524574	yes	TATGAGGACGAATCTCCCGCTTATA	TAGTTGGTGGGTTTCCCTACCGTGT	GGTCTCG	tata	CCATCAGGGTCTGGGGTTTC	gttt	tgagacc	GGTACAGTAAGTGAGAATCCTCTCT	GGTCTTGACAAACGTGTGCTTGTAC
PA14_29200	2525042..2525061	yes	TATGAGGACGAATCTCCCGCTTATA	TAGTTGGTGGGTTTCCCTACCGTGT	GGTCTCG	tata	GCTGGTTTTCTCGTAGTCGT	gttt	tgagacc	GGTACAGTAAGTGAGAATCCTCTCT	GGTCTTGACAAACGTGTGCTTGTAC
PA14_29210	2526778..2526797	yes	TATGAGGACGAATCTCCCGCTTATA	TAGTTGGTGGGTTTCCCTACCGTGT	GGTCTCG	tata	CCAGGGTGAGGCGGCGGGTG	gttt	tgagacc	GGTACAGTAAGTGAGAATCCTCTCT	GGTCTTGACAAACGTGTGCTTGTAC
PA14_29220	2528087..2528106	yes	TATGAGGACGAATCTCCCGCTTATA	TAGTTGGTGGGTTTCCCTACCGTGT	GGTCTCG	tata	GGCGGCCGACCGGTCGAACG	gttt	tgagacc	GGTACAGTAAGTGAGAATCCTCTCT	GGTCTTGACAAACGTGTGCTTGTAC
PA14_29230	2529972..2529991	yes	TATGAGGACGAATCTCCCGCTTATA	TAGTTGGTGGGTTTCCCTACCGTGT	GGTCTCG	tata	GCCGTTGTGCAGGATCAGGT	gttt	tgagacc	GGTACAGTAAGTGAGAATCCTCTCT	GGTCTTGACAAACGTGTGCTTGTAC
PA14_29240	2530617..2530636	yes	TATGAGGACGAATCTCCCGCTTATA	TAGTTGGTGGGTTTCCCTACCGTGT	GGTCTCG	tata	GAGTTAGAACTTCGAGATAG	gttt	tgagacc	GGTACAGTAAGTGAGAATCCTCTCT	GGTCTTGACAAACGTGTGCTTGTAC
PA14_29250	2531377..2531396	yes	TATGAGGACGAATCTCCCGCTTATA	TAGTTGGTGGGTTTCCCTACCGTGT	GGTCTCG	tata	GACGATCCCCACCAACAGTC	gttt	tgagacc	GGTACAGTAAGTGAGAATCCTCTCT	GGTCTTGACAAACGTGTGCTTGTAC
PA14_29260	2531810..2531829	yes	TATGAGGACGAATCTCCCGCTTATA	TAGTTGGTGGGTTTCCCTACCGTGT	GGTCTCG	tata	GTCGCCCTTTGTTCTGTCTA	gttt	tgagacc	GGTACAGTAAGTGAGAATCCTCTCT	GGTCTTGACAAACGTGTGCTTGTAC
PA14_29270	2532821..2532840	yes	TATGAGGACGAATCTCCCGCTTATA	TAGTTGGTGGGTTTCCCTACCGTGT	GGTCTCG	tata	ACCCCGTTACGCCGCGACCC	gttt	tgagacc	GGTACAGTAAGTGAGAATCCTCTCT	GGTCTTGACAAACGTGTGCTTGTAC
PA14_29280	2533998..2534017	yes	TATGAGGACGAATCTCCCGCTTATA	TAGTTGGTGGGTTTCCCTACCGTGT	GGTCTCG	tata	CGGTGCCTCGGCGCTGTATC	gttt	tgagacc	GGTACAGTAAGTGAGAATCCTCTCT	GGTCTTGACAAACGTGTGCTTGTAC
PA14_29290	2534814..2534833	yes	TATGAGGACGAATCTCCCGCTTATA	TAGTTGGTGGGTTTCCCTACCGTGT	GGTCTCG	tata	ATGGTCAGTTGGTAGCTGCC	gttt	tgagacc	GGTACAGTAAGTGAGAATCCTCTCT	GGTCTTGACAAACGTGTGCTTGTAC
PA14_29300	2535498..2535517	yes	TATGAGGACGAATCTCCCGCTTATA	TAGTTGGTGGGTTTCCCTACCGTGT	GGTCTCG	tata	GTGGATGCCGTATTCGACGC	gttt	tgagacc	GGTACAGTAAGTGAGAATCCTCTCT	GGTCTTGACAAACGTGTGCTTGTAC
PA14_29320	2535822..2535841	yes	TATGAGGACGAATCTCCCGCTTATA	TAGTTGGTGGGTTTCCCTACCGTGT	GGTCTCG	tata	CGAATCCGGCACCGACGATC	gttt	tgagacc	GGTACAGTAAGTGAGAATCCTCTCT	GGTCTTGACAAACGTGTGCTTGTAC
PA14_29330	2538001..2538020	yes	TATGAGGACGAATCTCCCGCTTATA	TAGTTGGTGGGTTTCCCTACCGTGT	GGTCTCG	tata	TCGAGTTGCGTCCGGACGGT	gttt	tgagacc	GGTACAGTAAGTGAGAATCCTCTCT	GGTCTTGACAAACGTGTGCTTGTAC
PA14_29340	2539378..2539397	yes	TATGAGGACGAATCTCCCGCTTATA	TAGTTGGTGGGTTTCCCTACCGTGT	GGTCTCG	tata	GCCCAGGGCGGCGACGAGCA	gttt	tgagacc	GGTACAGTAAGTGAGAATCCTCTCT	GGTCTTGACAAACGTGTGCTTGTAC
PA14_29350	2541644..2541663	yes	TATGAGGACGAATCTCCCGCTTATA	TAGTTGGTGGGTTTCCCTACCGTGT	GGTCTCG	tata	AACGGCGGGAAGGGCGCGTG	gttt	tgagacc	GGTACAGTAAGTGAGAATCCTCTCT	GGTCTTGACAAACGTGTGCTTGTAC
PA14_29360	2543076..2543095	yes	TATGAGGACGAATCTCCCGCTTATA	TAGTTGGTGGGTTTCCCTACCGTGT	GGTCTCG	tata	GCGCCAGTTTCCATAACAGC	gttt	tgagacc	GGTACAGTAAGTGAGAATCCTCTCT	GGTCTTGACAAACGTGTGCTTGTAC
PA14_29375	2543844..2543863	yes	TATGAGGACGAATCTCCCGCTTATA	TAGTTGGTGGGTTTCCCTACCGTGT	GGTCTCG	tata	TTTGCCGGGTATCGGGCAAT	gttt	tgagacc	GGTACAGTAAGTGAGAATCCTCTCT	GGTCTTGACAAACGTGTGCTTGTAC
PA14_29390	2544096..2544115	no	TATGAGGACGAATCTCCCGCTTATA	TAGTTGGTGGGTTTCCCTACCGTGT	GGTCTCG	tata	GTGCACCAGACGGGTATGTT	gttt	tgagacc	GGTACAGTAAGTGAGAATCCTCTCT	GGTCTTGACAAACGTGTGCTTGTAC
PA14_29400	2546213..2546232	yes	TATGAGGACGAATCTCCCGCTTATA	TAGTTGGTGGGTTTCCCTACCGTGT	GGTCTCG	tata	CGCCGACATGGGAAACCGGT	gttt	tgagacc	GGTACAGTAAGTGAGAATCCTCTCT	GGTCTTGACAAACGTGTGCTTGTAC
PA14_29400,PA14_29405	2550119..2550138	yes	TATGAGGACGAATCTCCCGCTTATA	TAGTTGGTGGGTTTCCCTACCGTGT	GGTCTCG	tata	CCTCTTCTTCGTCCTTCAGC	gttt	tgagacc	GGTACAGTAAGTGAGAATCCTCTCT	GGTCTTGACAAACGTGTGCTTGTAC
PA14_29410	2550517..2550536	yes	TATGAGGACGAATCTCCCGCTTATA	TAGTTGGTGGGTTTCCCTACCGTGT	GGTCTCG	tata	TCACATCGTCGTAGGTAGGC	gttt	tgagacc	GGTACAGTAAGTGAGAATCCTCTCT	GGTCTTGACAAACGTGTGCTTGTAC
PA14_29420	2552673..2552692	yes	TATGAGGACGAATCTCCCGCTTATA	TAGTTGGTGGGTTTCCCTACCGTGT	GGTCTCG	tata	CCGGCCGCTGCCGTCGGACG	gttt	tgagacc	GGTACAGTAAGTGAGAATCCTCTCT	GGTCTTGACAAACGTGTGCTTGTAC
PA14_29440	2553801..2553820	yes	TATGAGGACGAATCTCCCGCTTATA	TAGTTGGTGGGTTTCCCTACCGTGT	GGTCTCG	tata	TCGGCCTGCCGGCTGTCGAA	gttt	tgagacc	GGTACAGTAAGTGAGAATCCTCTCT	GGTCTTGACAAACGTGTGCTTGTAC
PA14_29460	2554801..2554820	yes	TATGAGGACGAATCTCCCGCTTATA	TAGTTGGTGGGTTTCCCTACCGTGT	GGTCTCG	tata	GCGTTGAGGGTGATGCGACT	gttt	tgagacc	GGTACAGTAAGTGAGAATCCTCTCT	GGTCTTGACAAACGTGTGCTTGTAC
PA14_29470	2555064..2555083	yes	TATGAGGACGAATCTCCCGCTTATA	TAGTTGGTGGGTTTCCCTACCGTGT	GGTCTCG	tata	GTGGAGAAATGATCCTTGAA	gttt	tgagacc	GGTACAGTAAGTGAGAATCCTCTCT	GGTCTTGACAAACGTGTGCTTGTAC
PA14_29480	2556410..2556429	yes	TATGAGGACGAATCTCCCGCTTATA	TAGTTGGTGGGTTTCCCTACCGTGT	GGTCTCG	tata	GAGACTGGCCGGTACCAAGA	gttt	tgagacc	GGTACAGTAAGTGAGAATCCTCTCT	GGTCTTGACAAACGTGTGCTTGTAC
PA14_29480,PA14_29490	2557197..2557216	yes	TATGAGGACGAATCTCCCGCTTATA	TAGTTGGTGGGTTTCCCTACCGTGT	GGTCTCG	tata	GCCCGGGGAAACGGCCTCAG	gttt	tgagacc	GGTACAGTAAGTGAGAATCCTCTCT	GGTCTTGACAAACGTGTGCTTGTAC
PA14_29500	2558939..2558958	yes	TATGAGGACGAATCTCCCGCTTATA	TAGTTGGTGGGTTTCCCTACCGTGT	GGTCTCG	tata	TGCCCTTGCGATCGACGGCT	gttt	tgagacc	GGTACAGTAAGTGAGAATCCTCTCT	GGTCTTGACAAACGTGTGCTTGTAC
PA14_29510	2560253..2560272	yes	TATGAGGACGAATCTCCCGCTTATA	TAGTTGGTGGGTTTCCCTACCGTGT	GGTCTCG	tata	TCGGCCTGACTGAACAGTCG	gttt	tgagacc	GGTACAGTAAGTGAGAATCCTCTCT	GGTCTTGACAAACGTGTGCTTGTAC
PA14_29510,PA14_29520	2560572..2560591	yes	TATGAGGACGAATCTCCCGCTTATA	TAGTTGGTGGGTTTCCCTACCGTGT	GGTCTCG	tata	TTTGGGCGCGTAACCGACAT	gttt	tgagacc	GGTACAGTAAGTGAGAATCCTCTCT	GGTCTTGACAAACGTGTGCTTGTAC
PA14_29530	2560982..2561001	yes	TATGAGGACGAATCTCCCGCTTATA	TAGTTGGTGGGTTTCCCTACCGTGT	GGTCTCG	tata	GTGAAGCCTTCCTGCCGCGC	gttt	tgagacc	GGTACAGTAAGTGAGAATCCTCTCT	GGTCTTGACAAACGTGTGCTTGTAC
PA14_29540	2561406..2561425	yes	TATGAGGACGAATCTCCCGCTTATA	TAGTTGGTGGGTTTCCCTACCGTGT	GGTCTCG	tata	CATCCTGTTTTCGTCGCGAG	gttt	tgagacc	GGTACAGTAAGTGAGAATCCTCTCT	GGTCTTGACAAACGTGTGCTTGTAC
PA14_29550	2562001..2562020	yes	TATGAGGACGAATCTCCCGCTTATA	TAGTTGGTGGGTTTCCCTACCGTGT	GGTCTCG	tata	AGCGGGCAGACGCCGCATGT	gttt	tgagacc	GGTACAGTAAGTGAGAATCCTCTCT	GGTCTTGACAAACGTGTGCTTGTAC
PA14_29560	2563117..2563136	yes	TATGAGGACGAATCTCCCGCTTATA	TAGTTGGTGGGTTTCCCTACCGTGT	GGTCTCG	tata	ATCCACGATCCACTGCGCTG	gttt	tgagacc	GGTACAGTAAGTGAGAATCCTCTCT	GGTCTTGACAAACGTGTGCTTGTAC
PA14_29570	2564101..2564120	yes	TATGAGGACGAATCTCCCGCTTATA	TAGTTGGTGGGTTTCCCTACCGTGT	GGTCTCG	tata	CCTGGAACTGCAGTGATCGC	gttt	tgagacc	GGTACAGTAAGTGAGAATCCTCTCT	GGTCTTGACAAACGTGTGCTTGTAC
PA14_29575	2564935..2564954	yes	TATGAGGACGAATCTCCCGCTTATA	TAGTTGGTGGGTTTCCCTACCGTGT	GGTCTCG	tata	TTCATGGCAATGGTATCCAT	gttt	tgagacc	GGTACAGTAAGTGAGAATCCTCTCT	GGTCTTGACAAACGTGTGCTTGTAC
PA14_29590	2565634..2565653	yes	TATGAGGACGAATCTCCCGCTTATA	TAGTTGGTGGGTTTCCCTACCGTGT	GGTCTCG	tata	CTCGCGGAACTCGGCAAGTT	gttt	tgagacc	GGTACAGTAAGTGAGAATCCTCTCT	GGTCTTGACAAACGTGTGCTTGTAC
PA14_29600	2566280..2566299	yes	TATGAGGACGAATCTCCCGCTTATA	TAGTTGGTGGGTTTCCCTACCGTGT	GGTCTCG	tata	CAGGCGATGGGCGGATTCGA	gttt	tgagacc	GGTACAGTAAGTGAGAATCCTCTCT	GGTCTTGACAAACGTGTGCTTGTAC
PA14_29620	2567952..2567971	yes	TATGAGGACGAATCTCCCGCTTATA	TAGTTGGTGGGTTTCCCTACCGTGT	GGTCTCG	tata	GGTGGCAAGCAAGGGATTGG	gttt	tgagacc	GGTACAGTAAGTGAGAATCCTCTCT	GGTCTTGACAAACGTGTGCTTGTAC
PA14_29640	2568143..2568162	yes	TATGAGGACGAATCTCCCGCTTATA	TAGTTGGTGGGTTTCCCTACCGTGT	GGTCTCG	tata	GATGAGGGCACGTTGGGCAT	gttt	tgagacc	GGTACAGTAAGTGAGAATCCTCTCT	GGTCTTGACAAACGTGTGCTTGTAC
PA14_29650	2569392..2569411	yes	TATGAGGACGAATCTCCCGCTTATA	TAGTTGGTGGGTTTCCCTACCGTGT	GGTCTCG	tata	CCGATCCGCAGCACCCGCCG	gttt	tgagacc	GGTACAGTAAGTGAGAATCCTCTCT	GGTCTTGACAAACGTGTGCTTGTAC
PA14_29660	2569634..2569653	yes	TATGAGGACGAATCTCCCGCTTATA	TAGTTGGTGGGTTTCCCTACCGTGT	GGTCTCG	tata	CGGCGGTATGGCCATCAGCC	gttt	tgagacc	GGTACAGTAAGTGAGAATCCTCTCT	GGTCTTGACAAACGTGTGCTTGTAC
PA14_29680	2571917..2571936	yes	TATGAGGACGAATCTCCCGCTTATA	TAGTTGGTGGGTTTCCCTACCGTGT	GGTCTCG	tata	GATGCCGTGGATCAGCGCTA	gttt	tgagacc	GGTACAGTAAGTGAGAATCCTCTCT	GGTCTTGACAAACGTGTGCTTGTAC
PA14_29690	2573033..2573052	yes	TATGAGGACGAATCTCCCGCTTATA	TAGTTGGTGGGTTTCCCTACCGTGT	GGTCTCG	tata	GGGGACTTGATCTGGATGGC	gttt	tgagacc	GGTACAGTAAGTGAGAATCCTCTCT	GGTCTTGACAAACGTGTGCTTGTAC
PA14_29710	2573292..2573311	yes	TATGAGGACGAATCTCCCGCTTATA	TAGTTGGTGGGTTTCCCTACCGTGT	GGTCTCG	tata	GATGGCGGTGGCGGCGAACA	gttt	tgagacc	GGTACAGTAAGTGAGAATCCTCTCT	GGTCTTGACAAACGTGTGCTTGTAC
PA14_29720	2573606..2573625	yes	TATGAGGACGAATCTCCCGCTTATA	TAGTTGGTGGGTTTCCCTACCGTGT	GGTCTCG	tata	CAGGACCAGTGCGACGATCC	gttt	tgagacc	GGTACAGTAAGTGAGAATCCTCTCT	GGTCTTGACAAACGTGTGCTTGTAC
PA14_29730	2573928..2573947	yes	TATGAGGACGAATCTCCCGCTTATA	TAGTTGGTGGGTTTCCCTACCGTGT	GGTCTCG	tata	GCCATCAGTTCGTCGGCCAG	gttt	tgagacc	GGTACAGTAAGTGAGAATCCTCTCT	GGTCTTGACAAACGTGTGCTTGTAC
PA14_29740	2574577..2574596	yes	TATGAGGACGAATCTCCCGCTTATA	TAGTTGGTGGGTTTCCCTACCGTGT	GGTCTCG	tata	GGCCGACGCTCAAGCGCCGC	gttt	tgagacc	GGTACAGTAAGTGAGAATCCTCTCT	GGTCTTGACAAACGTGTGCTTGTAC
PA14_29750	2576017..2576036	yes	TATGAGGACGAATCTCCCGCTTATA	TAGTTGGTGGGTTTCCCTACCGTGT	GGTCTCG	tata	GCATCAGCGCCCAGCGCCAG	gttt	tgagacc	GGTACAGTAAGTGAGAATCCTCTCT	GGTCTTGACAAACGTGTGCTTGTAC
PA14_29760	2578421..2578440	yes	TATGAGGACGAATCTCCCGCTTATA	TAGTTGGTGGGTTTCCCTACCGTGT	GGTCTCG	tata	ATTGGATGGACAGGCGGCGA	gttt	tgagacc	GGTACAGTAAGTGAGAATCCTCTCT	GGTCTTGACAAACGTGTGCTTGTAC
PA14_29770	2578748..2578767	yes	TATGAGGACGAATCTCCCGCTTATA	TAGTTGGTGGGTTTCCCTACCGTGT	GGTCTCG	tata	CATGCACACGGCAAAGGCTG	gttt	tgagacc	GGTACAGTAAGTGAGAATCCTCTCT	GGTCTTGACAAACGTGTGCTTGTAC
PA14_29800	2580162..2580181	yes	TATGAGGACGAATCTCCCGCTTATA	TAGTTGGTGGGTTTCCCTACCGTGT	GGTCTCG	tata	CAGGAGGACTTTGGATTTCA	gttt	tgagacc	GGTACAGTAAGTGAGAATCCTCTCT	GGTCTTGACAAACGTGTGCTTGTAC
PA14_29820	2582016..2582035	yes	TATGAGGACGAATCTCCCGCTTATA	TAGTTGGTGGGTTTCCCTACCGTGT	GGTCTCG	tata	CAGCAACAGGAGAAAAGTCC	gttt	tgagacc	GGTACAGTAAGTGAGAATCCTCTCT	GGTCTTGACAAACGTGTGCTTGTAC
PA14_29830	2584040..2584059	yes	TATGAGGACGAATCTCCCGCTTATA	TAGTTGGTGGGTTTCCCTACCGTGT	GGTCTCG	tata	ACGTCGATATCGTGGAAGGT	gttt	tgagacc	GGTACAGTAAGTGAGAATCCTCTCT	GGTCTTGACAAACGTGTGCTTGTAC
PA14_29850	2585614..2585633	yes	TATGAGGACGAATCTCCCGCTTATA	TAGTTGGTGGGTTTCCCTACCGTGT	GGTCTCG	tata	GATGAAGTGTTGGATCGTAA	gttt	tgagacc	GGTACAGTAAGTGAGAATCCTCTCT	GGTCTTGACAAACGTGTGCTTGTAC
PA14_29860	2587146..2587165	yes	TATGAGGACGAATCTCCCGCTTATA	TAGTTGGTGGGTTTCCCTACCGTGT	GGTCTCG	tata	AAGGGGATCAGGATTAGCCA	gttt	tgagacc	GGTACAGTAAGTGAGAATCCTCTCT	GGTCTTGACAAACGTGTGCTTGTAC
PA14_29880	2589025..2589044	yes	TATGAGGACGAATCTCCCGCTTATA	TAGTTGGTGGGTTTCCCTACCGTGT	GGTCTCG	tata	ACAGGAAGGTAAGAGGTAGA	gttt	tgagacc	GGTACAGTAAGTGAGAATCCTCTCT	GGTCTTGACAAACGTGTGCTTGTAC
PA14_29890	2589323..2589342	yes	TATGAGGACGAATCTCCCGCTTATA	TAGTTGGTGGGTTTCCCTACCGTGT	GGTCTCG	tata	AGGGCCAGGCCGTGTTCCAG	gttt	tgagacc	GGTACAGTAAGTGAGAATCCTCTCT	GGTCTTGACAAACGTGTGCTTGTAC
PA14_29900	2589856..2589875	yes	TATGAGGACGAATCTCCCGCTTATA	TAGTTGGTGGGTTTCCCTACCGTGT	GGTCTCG	tata	CGTGGCCAGTACGGCGACGC	gttt	tgagacc	GGTACAGTAAGTGAGAATCCTCTCT	GGTCTTGACAAACGTGTGCTTGTAC
PA14_29920	2590407..2590426	yes	TATGAGGACGAATCTCCCGCTTATA	TAGTTGGTGGGTTTCCCTACCGTGT	GGTCTCG	tata	CAGGCTGCGAAGCTGGGTGA	gttt	tgagacc	GGTACAGTAAGTGAGAATCCTCTCT	GGTCTTGACAAACGTGTGCTTGTAC
PA14_29930	2591433..2591452	yes	TATGAGGACGAATCTCCCGCTTATA	TAGTTGGTGGGTTTCCCTACCGTGT	GGTCTCG	tata	AGGATGATGGTGACCAGAGC	gttt	tgagacc	GGTACAGTAAGTGAGAATCCTCTCT	GGTCTTGACAAACGTGTGCTTGTAC
PA14_29940	2594158..2594177	yes	TATGAGGACGAATCTCCCGCTTATA	TAGTTGGTGGGTTTCCCTACCGTGT	GGTCTCG	tata	CTTGCCGTCTACGTGGATAG	gttt	tgagacc	GGTACAGTAAGTGAGAATCCTCTCT	GGTCTTGACAAACGTGTGCTTGTAC
PA14_29970	2595639..2595658	yes	TATGAGGACGAATCTCCCGCTTATA	TAGTTGGTGGGTTTCCCTACCGTGT	GGTCTCG	tata	GGCCGGACCAATGGAGGTAA	gttt	tgagacc	GGTACAGTAAGTGAGAATCCTCTCT	GGTCTTGACAAACGTGTGCTTGTAC
PA14_29980	2596135..2596154	yes	TATGAGGACGAATCTCCCGCTTATA	TAGTTGGTGGGTTTCCCTACCGTGT	GGTCTCG	tata	CGGTCTGAATCAGGTTGCTC	gttt	tgagacc	GGTACAGTAAGTGAGAATCCTCTCT	GGTCTTGACAAACGTGTGCTTGTAC
PA14_29990	2597910..2597929	yes	TATGAGGACGAATCTCCCGCTTATA	TAGTTGGTGGGTTTCCCTACCGTGT	GGTCTCG	tata	GTAAGGCGGGATGTACAGAG	gttt	tgagacc	GGTACAGTAAGTGAGAATCCTCTCT	GGTCTTGACAAACGTGTGCTTGTAC
PA14_30010	2598664..2598683	yes	TATGAGGACGAATCTCCCGCTTATA	TAGTTGGTGGGTTTCCCTACCGTGT	GGTCTCG	tata	TGGCCGCATCGGGATCGATC	gttt	tgagacc	GGTACAGTAAGTGAGAATCCTCTCT	GGTCTTGACAAACGTGTGCTTGTAC
PA14_30020	2599102..2599121	yes	TATGAGGACGAATCTCCCGCTTATA	TAGTTGGTGGGTTTCCCTACCGTGT	GGTCTCG	tata	GCTGCAAGTTCAGCTGGGTT	gttt	tgagacc	GGTACAGTAAGTGAGAATCCTCTCT	GGTCTTGACAAACGTGTGCTTGTAC
PA14_30030	2600245..2600264	yes	TATGAGGACGAATCTCCCGCTTATA	TAGTTGGTGGGTTTCCCTACCGTGT	GGTCTCG	tata	TGGCGTCCTTCCATAGAGAG	gttt	tgagacc	GGTACAGTAAGTGAGAATCCTCTCT	GGTCTTGACAAACGTGTGCTTGTAC
PA14_30040	2602351..2602370	yes	TATGAGGACGAATCTCCCGCTTATA	TAGTTGGTGGGTTTCCCTACCGTGT	GGTCTCG	tata	GGATGGCATCTTTTTTCTCC	gttt	tgagacc	GGTACAGTAAGTGAGAATCCTCTCT	GGTCTTGACAAACGTGTGCTTGTAC
PA14_30050	2604127..2604146	yes	TATGAGGACGAATCTCCCGCTTATA	TAGTTGGTGGGTTTCCCTACCGTGT	GGTCTCG	tata	CTTGATCTCGTTCTGATATG	gttt	tgagacc	GGTACAGTAAGTGAGAATCCTCTCT	GGTCTTGACAAACGTGTGCTTGTAC
PA14_30065	2604489..2604508	yes	TATGAGGACGAATCTCCCGCTTATA	TAGTTGGTGGGTTTCCCTACCGTGT	GGTCTCG	tata	GGCGTATCGGCGCAGGCACC	gttt	tgagacc	GGTACAGTAAGTGAGAATCCTCTCT	GGTCTTGACAAACGTGTGCTTGTAC
PA14_30070	2605542..2605561	no	TATGAGGACGAATCTCCCGCTTATA	TAGTTGGTGGGTTTCCCTACCGTGT	GGTCTCG	tata	AGAGCAGGGTGGTGCGCAAC	gttt	tgagacc	GGTACAGTAAGTGAGAATCCTCTCT	GGTCTTGACAAACGTGTGCTTGTAC
PA14_30080	2606145..2606164	yes	TATGAGGACGAATCTCCCGCTTATA	TAGTTGGTGGGTTTCCCTACCGTGT	GGTCTCG	tata	GGCCGGCAGGTCGGCCGGCG	gttt	tgagacc	GGTACAGTAAGTGAGAATCCTCTCT	GGTCTTGACAAACGTGTGCTTGTAC
PA14_30090	2606585..2606604	yes	TATGAGGACGAATCTCCCGCTTATA	TAGTTGGTGGGTTTCCCTACCGTGT	GGTCTCG	tata	GCCAGTCGGCTACGCGTACG	gttt	tgagacc	GGTACAGTAAGTGAGAATCCTCTCT	GGTCTTGACAAACGTGTGCTTGTAC
PA14_30100	2607743..2607762	yes	TATGAGGACGAATCTCCCGCTTATA	TAGTTGGTGGGTTTCCCTACCGTGT	GGTCTCG	tata	AGTCCGCCCAGAAGTTGCAG	gttt	tgagacc	GGTACAGTAAGTGAGAATCCTCTCT	GGTCTTGACAAACGTGTGCTTGTAC
PA14_30110	2609178..2609197	yes	TATGAGGACGAATCTCCCGCTTATA	TAGTTGGTGGGTTTCCCTACCGTGT	GGTCTCG	tata	GGGGGATACCGCGGTGAGCG	gttt	tgagacc	GGTACAGTAAGTGAGAATCCTCTCT	GGTCTTGACAAACGTGTGCTTGTAC
PA14_30130	2610150..2610169	yes	TATGAGGACGAATCTCCCGCTTATA	TAGTTGGTGGGTTTCCCTACCGTGT	GGTCTCG	tata	TTGCGGCTGGCTCCCGGCCA	gttt	tgagacc	GGTACAGTAAGTGAGAATCCTCTCT	GGTCTTGACAAACGTGTGCTTGTAC
PA14_30140	2610768..2610787	yes	TATGAGGACGAATCTCCCGCTTATA	TAGTTGGTGGGTTTCCCTACCGTGT	GGTCTCG	tata	AGGGCAATCAGTTGCTGTCG	gttt	tgagacc	GGTACAGTAAGTGAGAATCCTCTCT	GGTCTTGACAAACGTGTGCTTGTAC
PA14_30150	2611891..2611910	yes	TATGAGGACGAATCTCCCGCTTATA	TAGTTGGTGGGTTTCCCTACCGTGT	GGTCTCG	tata	CTCGCGGCGTGGGGTGGGGG	gttt	tgagacc	GGTACAGTAAGTGAGAATCCTCTCT	GGTCTTGACAAACGTGTGCTTGTAC
PA14_30160	2612403..2612422	yes	TATGAGGACGAATCTCCCGCTTATA	TAGTTGGTGGGTTTCCCTACCGTGT	GGTCTCG	tata	ATGGTCGCTACGGTGACATG	gttt	tgagacc	GGTACAGTAAGTGAGAATCCTCTCT	GGTCTTGACAAACGTGTGCTTGTAC
PA14_30180	2614723..2614742	yes	TATGAGGACGAATCTCCCGCTTATA	TAGTTGGTGGGTTTCCCTACCGTGT	GGTCTCG	tata	GTAGGTGATCTTCGAGCGGA	gttt	tgagacc	GGTACAGTAAGTGAGAATCCTCTCT	GGTCTTGACAAACGTGTGCTTGTAC
PA14_30190	2615119..2615138	yes	TATGAGGACGAATCTCCCGCTTATA	TAGTTGGTGGGTTTCCCTACCGTGT	GGTCTCG	tata	TCGCCGGCACCTGGATCTTT	gttt	tgagacc	GGTACAGTAAGTGAGAATCCTCTCT	GGTCTTGACAAACGTGTGCTTGTAC
PA14_30200	2616654..2616673	yes	TATGAGGACGAATCTCCCGCTTATA	TAGTTGGTGGGTTTCCCTACCGTGT	GGTCTCG	tata	CAGGATGAACCCGTAGCCCT	gttt	tgagacc	GGTACAGTAAGTGAGAATCCTCTCT	GGTCTTGACAAACGTGTGCTTGTAC
PA14_30210	2616948..2616967	yes	TATGAGGACGAATCTCCCGCTTATA	TAGTTGGTGGGTTTCCCTACCGTGT	GGTCTCG	tata	AATGTTAGTCGAATCTGGCT	gttt	tgagacc	GGTACAGTAAGTGAGAATCCTCTCT	GGTCTTGACAAACGTGTGCTTGTAC
PA14_30230	2617360..2617379	yes	TATGAGGACGAATCTCCCGCTTATA	TAGTTGGTGGGTTTCCCTACCGTGT	GGTCTCG	tata	CTCCTTGAAGGCGAGATTGA	gttt	tgagacc	GGTACAGTAAGTGAGAATCCTCTCT	GGTCTTGACAAACGTGTGCTTGTAC
PA14_30240	2619840..2619859	yes	TATGAGGACGAATCTCCCGCTTATA	TAGTTGGTGGGTTTCCCTACCGTGT	GGTCTCG	tata	ACGGAACATGGTGTTGGGCA	gttt	tgagacc	GGTACAGTAAGTGAGAATCCTCTCT	GGTCTTGACAAACGTGTGCTTGTAC
PA14_30260	2620694..2620713	yes	TATGAGGACGAATCTCCCGCTTATA	TAGTTGGTGGGTTTCCCTACCGTGT	GGTCTCG	tata	GAACTTCAGTCGGGCGAGTT	gttt	tgagacc	GGTACAGTAAGTGAGAATCCTCTCT	GGTCTTGACAAACGTGTGCTTGTAC
PA14_30270	2621426..2621445	yes	TATGAGGACGAATCTCCCGCTTATA	TAGTTGGTGGGTTTCCCTACCGTGT	GGTCTCG	tata	GAAGTCGGTGCGGGAAAGCC	gttt	tgagacc	GGTACAGTAAGTGAGAATCCTCTCT	GGTCTTGACAAACGTGTGCTTGTAC
PA14_30280	2622398..2622417	yes	TATGAGGACGAATCTCCCGCTTATA	TAGTTGGTGGGTTTCCCTACCGTGT	GGTCTCG	tata	GACCGGAGCCCAGGATGATG	gttt	tgagacc	GGTACAGTAAGTGAGAATCCTCTCT	GGTCTTGACAAACGTGTGCTTGTAC
PA14_30290	2622708..2622727	yes	TATGAGGACGAATCTCCCGCTTATA	TAGTTGGTGGGTTTCCCTACCGTGT	GGTCTCG	tata	TGCGGCGGCATGGCTCGCGG	gttt	tgagacc	GGTACAGTAAGTGAGAATCCTCTCT	GGTCTTGACAAACGTGTGCTTGTAC
PA14_30310	2625146..2625165	yes	TATGAGGACGAATCTCCCGCTTATA	TAGTTGGTGGGTTTCCCTACCGTGT	GGTCTCG	tata	GGGCGGCAACGAACAACGTG	gttt	tgagacc	GGTACAGTAAGTGAGAATCCTCTCT	GGTCTTGACAAACGTGTGCTTGTAC
PA14_30320	2625793..2625812	yes	TATGAGGACGAATCTCCCGCTTATA	TAGTTGGTGGGTTTCCCTACCGTGT	GGTCTCG	tata	TGCCGCCAGGGGCTGCGCGA	gttt	tgagacc	GGTACAGTAAGTGAGAATCCTCTCT	GGTCTTGACAAACGTGTGCTTGTAC
PA14_30330	2627227..2627246	yes	TATGAGGACGAATCTCCCGCTTATA	TAGTTGGTGGGTTTCCCTACCGTGT	GGTCTCG	tata	GGCTGGGTGCGTACCAGTTT	gttt	tgagacc	GGTACAGTAAGTGAGAATCCTCTCT	GGTCTTGACAAACGTGTGCTTGTAC
PA14_30340	2628512..2628531	yes	TATGAGGACGAATCTCCCGCTTATA	TAGTTGGTGGGTTTCCCTACCGTGT	GGTCTCG	tata	CCTTGCAAGGAGTGGAACAG	gttt	tgagacc	GGTACAGTAAGTGAGAATCCTCTCT	GGTCTTGACAAACGTGTGCTTGTAC
PA14_30350	2630831..2630850	yes	TATGAGGACGAATCTCCCGCTTATA	TAGTTGGTGGGTTTCCCTACCGTGT	GGTCTCG	tata	CATACCACTGGTCGTGCCAG	gttt	tgagacc	GGTACAGTAAGTGAGAATCCTCTCT	GGTCTTGACAAACGTGTGCTTGTAC
PA14_30360	2631907..2631926	yes	TATGAGGACGAATCTCCCGCTTATA	TAGTTGGTGGGTTTCCCTACCGTGT	GGTCTCG	tata	TGGGCGAACGGATGTTCGGC	gttt	tgagacc	GGTACAGTAAGTGAGAATCCTCTCT	GGTCTTGACAAACGTGTGCTTGTAC
PA14_30370	2632246..2632265	yes	TATGAGGACGAATCTCCCGCTTATA	TAGTTGGTGGGTTTCCCTACCGTGT	GGTCTCG	tata	TTTCCCGGCCTTCCAGCGTA	gttt	tgagacc	GGTACAGTAAGTGAGAATCCTCTCT	GGTCTTGACAAACGTGTGCTTGTAC
PA14_30380	2632552..2632571	yes	TATGAGGACGAATCTCCCGCTTATA	TAGTTGGTGGGTTTCCCTACCGTGT	GGTCTCG	tata	GGACAGTACGTGGAGGGTCG	gttt	tgagacc	GGTACAGTAAGTGAGAATCCTCTCT	GGTCTTGACAAACGTGTGCTTGTAC
PA14_30390	2632910..2632929	yes	TATGAGGACGAATCTCCCGCTTATA	TAGTTGGTGGGTTTCCCTACCGTGT	GGTCTCG	tata	GGCTGATGATCAGCAGCGAC	gttt	tgagacc	GGTACAGTAAGTGAGAATCCTCTCT	GGTCTTGACAAACGTGTGCTTGTAC
PA14_30400	2633291..2633310	no	TATGAGGACGAATCTCCCGCTTATA	TAGTTGGTGGGTTTCCCTACCGTGT	GGTCTCG	tata	GGAGTGGGGAGGGTCGAATA	gttt	tgagacc	GGTACAGTAAGTGAGAATCCTCTCT	GGTCTTGACAAACGTGTGCTTGTAC
PA14_30410	2634058..2634077	yes	TATGAGGACGAATCTCCCGCTTATA	TAGTTGGTGGGTTTCCCTACCGTGT	GGTCTCG	tata	TTCACGCTGTTCCGCGACGG	gttt	tgagacc	GGTACAGTAAGTGAGAATCCTCTCT	GGTCTTGACAAACGTGTGCTTGTAC
PA14_30420	2634251..2634270	yes	TATGAGGACGAATCTCCCGCTTATA	TAGTTGGTGGGTTTCCCTACCGTGT	GGTCTCG	tata	GACCGTTGCCTTAAACCACT	gttt	tgagacc	GGTACAGTAAGTGAGAATCCTCTCT	GGTCTTGACAAACGTGTGCTTGTAC
PA14_30430	2636018..2636037	yes	TATGAGGACGAATCTCCCGCTTATA	TAGTTGGTGGGTTTCCCTACCGTGT	GGTCTCG	tata	GGAAGGTGCGTACGGCGATC	gttt	tgagacc	GGTACAGTAAGTGAGAATCCTCTCT	GGTCTTGACAAACGTGTGCTTGTAC
PA14_30440	2636618..2636637	yes	TATGAGGACGAATCTCCCGCTTATA	TAGTTGGTGGGTTTCCCTACCGTGT	GGTCTCG	tata	CAGGCGGTCGAGGCGCAGGA	gttt	tgagacc	GGTACAGTAAGTGAGAATCCTCTCT	GGTCTTGACAAACGTGTGCTTGTAC
PA14_30450	2636801..2636820	yes	TATGAGGACGAATCTCCCGCTTATA	TAGTTGGTGGGTTTCCCTACCGTGT	GGTCTCG	tata	CCTGGCTCAGGGAAGCGTTG	gttt	tgagacc	GGTACAGTAAGTGAGAATCCTCTCT	GGTCTTGACAAACGTGTGCTTGTAC
PA14_30460	2638006..2638025	yes	TATGAGGACGAATCTCCCGCTTATA	TAGTTGGTGGGTTTCCCTACCGTGT	GGTCTCG	tata	CACCTCGGAACTCGGTGTGG	gttt	tgagacc	GGTACAGTAAGTGAGAATCCTCTCT	GGTCTTGACAAACGTGTGCTTGTAC
PA14_30470	2639093..2639112	yes	TATGAGGACGAATCTCCCGCTTATA	TAGTTGGTGGGTTTCCCTACCGTGT	GGTCTCG	tata	GCGTGGCGAAGCTGGTTAGC	gttt	tgagacc	GGTACAGTAAGTGAGAATCCTCTCT	GGTCTTGACAAACGTGTGCTTGTAC
PA14_30490	2640038..2640057	yes	TATGAGGACGAATCTCCCGCTTATA	TAGTTGGTGGGTTTCCCTACCGTGT	GGTCTCG	tata	GGCCGATCATGCCGAGAAAC	gttt	tgagacc	GGTACAGTAAGTGAGAATCCTCTCT	GGTCTTGACAAACGTGTGCTTGTAC
PA14_30500	2641121..2641140	yes	TATGAGGACGAATCTCCCGCTTATA	TAGTTGGTGGGTTTCCCTACCGTGT	GGTCTCG	tata	CGCCGAGGGAGTCTGCAGGA	gttt	tgagacc	GGTACAGTAAGTGAGAATCCTCTCT	GGTCTTGACAAACGTGTGCTTGTAC
PA14_30520	2642385..2642404	yes	TATGAGGACGAATCTCCCGCTTATA	TAGTTGGTGGGTTTCCCTACCGTGT	GGTCTCG	tata	AGGCCGGCAAGCACACACAG	gttt	tgagacc	GGTACAGTAAGTGAGAATCCTCTCT	GGTCTTGACAAACGTGTGCTTGTAC
PA14_30540	2643384..2643403	no	TATGAGGACGAATCTCCCGCTTATA	TAGTTGGTGGGTTTCCCTACCGTGT	GGTCTCG	tata	GAGAAGCAGGAACAGGCTCA	gttt	tgagacc	GGTACAGTAAGTGAGAATCCTCTCT	GGTCTTGACAAACGTGTGCTTGTAC
PA14_30550	2644495..2644514	yes	TATGAGGACGAATCTCCCGCTTATA	TAGTTGGTGGGTTTCCCTACCGTGT	GGTCTCG	tata	ATGGCCAAGCGACGCAGGAA	gttt	tgagacc	GGTACAGTAAGTGAGAATCCTCTCT	GGTCTTGACAAACGTGTGCTTGTAC
PA14_30560	2646051..2646070	no	TATGAGGACGAATCTCCCGCTTATA	TAGTTGGTGGGTTTCCCTACCGTGT	GGTCTCG	tata	TCAGCAGCCTGGGGCAGAAA	gttt	tgagacc	GGTACAGTAAGTGAGAATCCTCTCT	GGTCTTGACAAACGTGTGCTTGTAC
PA14_30570	2647290..2647309	yes	TATGAGGACGAATCTCCCGCTTATA	TAGTTGGTGGGTTTCCCTACCGTGT	GGTCTCG	tata	CCAGTTGTAAAGATGGACGC	gttt	tgagacc	GGTACAGTAAGTGAGAATCCTCTCT	GGTCTTGACAAACGTGTGCTTGTAC
PA14_30580	2647575..2647594	yes	TATGAGGACGAATCTCCCGCTTATA	TAGTTGGTGGGTTTCCCTACCGTGT	GGTCTCG	tata	CTTTCCCAGTGACTCGTGCC	gttt	tgagacc	GGTACAGTAAGTGAGAATCCTCTCT	GGTCTTGACAAACGTGTGCTTGTAC
PA14_30590	2648479..2648498	yes	TATGAGGACGAATCTCCCGCTTATA	TAGTTGGTGGGTTTCCCTACCGTGT	GGTCTCG	tata	CGAGAGGAAAGACGTACATC	gttt	tgagacc	GGTACAGTAAGTGAGAATCCTCTCT	GGTCTTGACAAACGTGTGCTTGTAC
PA14_30600	2651160..2651179	yes	TATGAGGACGAATCTCCCGCTTATA	TAGTTGGTGGGTTTCCCTACCGTGT	GGTCTCG	tata	CAGCACGCCGCCGCTGGTCG	gttt	tgagacc	GGTACAGTAAGTGAGAATCCTCTCT	GGTCTTGACAAACGTGTGCTTGTAC
PA14_30620	2653369..2653388	yes	TATGAGGACGAATCTCCCGCTTATA	TAGTTGGTGGGTTTCCCTACCGTGT	GGTCTCG	tata	CGTACTGGATGTTTTCGGAC	gttt	tgagacc	GGTACAGTAAGTGAGAATCCTCTCT	GGTCTTGACAAACGTGTGCTTGTAC
PA14_30630	2654021..2654040	yes	TATGAGGACGAATCTCCCGCTTATA	TAGTTGGTGGGTTTCCCTACCGTGT	GGTCTCG	tata	CCCGGCCCCCTGGATAAGAA	gttt	tgagacc	GGTACAGTAAGTGAGAATCCTCTCT	GGTCTTGACAAACGTGTGCTTGTAC
PA14_30650	2655533..2655552	yes	TATGAGGACGAATCTCCCGCTTATA	TAGTTGGTGGGTTTCCCTACCGTGT	GGTCTCG	tata	TACCGGTGCGTACCAGATCG	gttt	tgagacc	GGTACAGTAAGTGAGAATCCTCTCT	GGTCTTGACAAACGTGTGCTTGTAC
PA14_30660	2656159..2656178	yes	TATGAGGACGAATCTCCCGCTTATA	TAGTTGGTGGGTTTCCCTACCGTGT	GGTCTCG	tata	GAAGGCGCTCGCGTCGAAAA	gttt	tgagacc	GGTACAGTAAGTGAGAATCCTCTCT	GGTCTTGACAAACGTGTGCTTGTAC
PA14_30670	2658020..2658039	yes	TATGAGGACGAATCTCCCGCTTATA	TAGTTGGTGGGTTTCCCTACCGTGT	GGTCTCG	tata	GCAGTAACGTGAGCAGATTG	gttt	tgagacc	GGTACAGTAAGTGAGAATCCTCTCT	GGTCTTGACAAACGTGTGCTTGTAC
PA14_30680,PA14_27620,PA14_27610	2658670..2658689,2395739..2395758,2395579..2395598	no	TATGAGGACGAATCTCCCGCTTATA	TAGTTGGTGGGTTTCCCTACCGTGT	GGTCTCG	tata	TCGCGACCCCGACCTTGGCA	gttt	tgagacc	GGTACAGTAAGTGAGAATCCTCTCT	GGTCTTGACAAACGTGTGCTTGTAC
PA14_30690	2660476..2660495	yes	TATGAGGACGAATCTCCCGCTTATA	TAGTTGGTGGGTTTCCCTACCGTGT	GGTCTCG	tata	AGCTTGATGTGTGCGGGAGC	gttt	tgagacc	GGTACAGTAAGTGAGAATCCTCTCT	GGTCTTGACAAACGTGTGCTTGTAC
PA14_30700	2661162..2661181	yes	TATGAGGACGAATCTCCCGCTTATA	TAGTTGGTGGGTTTCCCTACCGTGT	GGTCTCG	tata	CCCAGAGCCTGCGGACACAT	gttt	tgagacc	GGTACAGTAAGTGAGAATCCTCTCT	GGTCTTGACAAACGTGTGCTTGTAC
PA14_30710	2664248..2664267	yes	TATGAGGACGAATCTCCCGCTTATA	TAGTTGGTGGGTTTCCCTACCGTGT	GGTCTCG	tata	GCGCCGCCTGTGCGCGCAGA	gttt	tgagacc	GGTACAGTAAGTGAGAATCCTCTCT	GGTCTTGACAAACGTGTGCTTGTAC
PA14_30720	2665060..2665079	yes	TATGAGGACGAATCTCCCGCTTATA	TAGTTGGTGGGTTTCCCTACCGTGT	GGTCTCG	tata	GCGTTCACGGATTTGCAATC	gttt	tgagacc	GGTACAGTAAGTGAGAATCCTCTCT	GGTCTTGACAAACGTGTGCTTGTAC
PA14_30730	2666509..2666528	yes	TATGAGGACGAATCTCCCGCTTATA	TAGTTGGTGGGTTTCCCTACCGTGT	GGTCTCG	tata	GGGGCTCAGACGCCGAGCGA	gttt	tgagacc	GGTACAGTAAGTGAGAATCCTCTCT	GGTCTTGACAAACGTGTGCTTGTAC
PA14_30740	2666979..2666998	yes	TATGAGGACGAATCTCCCGCTTATA	TAGTTGGTGGGTTTCCCTACCGTGT	GGTCTCG	tata	AACGCTTTCCGCCGTTGAGC	gttt	tgagacc	GGTACAGTAAGTGAGAATCCTCTCT	GGTCTTGACAAACGTGTGCTTGTAC
PA14_30750	2667886..2667905	yes	TATGAGGACGAATCTCCCGCTTATA	TAGTTGGTGGGTTTCCCTACCGTGT	GGTCTCG	tata	TGGGCCTGGGAGTGAGGGCA	gttt	tgagacc	GGTACAGTAAGTGAGAATCCTCTCT	GGTCTTGACAAACGTGTGCTTGTAC
PA14_30760	2669310..2669329	yes	TATGAGGACGAATCTCCCGCTTATA	TAGTTGGTGGGTTTCCCTACCGTGT	GGTCTCG	tata	ACGGAACCCGTGCCGGGTGT	gttt	tgagacc	GGTACAGTAAGTGAGAATCCTCTCT	GGTCTTGACAAACGTGTGCTTGTAC
PA14_30770	2669761..2669780	yes	TATGAGGACGAATCTCCCGCTTATA	TAGTTGGTGGGTTTCCCTACCGTGT	GGTCTCG	tata	CAGGCGTTGGTCGATGTCGT	gttt	tgagacc	GGTACAGTAAGTGAGAATCCTCTCT	GGTCTTGACAAACGTGTGCTTGTAC
PA14_30790	2669932..2669951	yes	TATGAGGACGAATCTCCCGCTTATA	TAGTTGGTGGGTTTCCCTACCGTGT	GGTCTCG	tata	TCCAGCGTACCGCGACGGAT	gttt	tgagacc	GGTACAGTAAGTGAGAATCCTCTCT	GGTCTTGACAAACGTGTGCTTGTAC
PA14_30800	2671451..2671470	yes	TATGAGGACGAATCTCCCGCTTATA	TAGTTGGTGGGTTTCCCTACCGTGT	GGTCTCG	tata	GGCGGTTCTTGATGGAGGAG	gttt	tgagacc	GGTACAGTAAGTGAGAATCCTCTCT	GGTCTTGACAAACGTGTGCTTGTAC
PA14_30810	2671855..2671874	yes	TATGAGGACGAATCTCCCGCTTATA	TAGTTGGTGGGTTTCCCTACCGTGT	GGTCTCG	tata	TTGATGGCCAGCATGGTGGT	gttt	tgagacc	GGTACAGTAAGTGAGAATCCTCTCT	GGTCTTGACAAACGTGTGCTTGTAC
PA14_30820	2673117..2673136	yes	TATGAGGACGAATCTCCCGCTTATA	TAGTTGGTGGGTTTCCCTACCGTGT	GGTCTCG	tata	TGCCGATGGCGCCCGAAGCG	gttt	tgagacc	GGTACAGTAAGTGAGAATCCTCTCT	GGTCTTGACAAACGTGTGCTTGTAC
PA14_30830	2676018..2676037	yes	TATGAGGACGAATCTCCCGCTTATA	TAGTTGGTGGGTTTCCCTACCGTGT	GGTCTCG	tata	ATCTCCGTCTCGTTGGAAGG	gttt	tgagacc	GGTACAGTAAGTGAGAATCCTCTCT	GGTCTTGACAAACGTGTGCTTGTAC
PA14_30840	2676183..2676202	yes	TATGAGGACGAATCTCCCGCTTATA	TAGTTGGTGGGTTTCCCTACCGTGT	GGTCTCG	tata	AGCAAGCGCCGGTTCCTGAT	gttt	tgagacc	GGTACAGTAAGTGAGAATCCTCTCT	GGTCTTGACAAACGTGTGCTTGTAC
PA14_30850	2679679..2679698	yes	TATGAGGACGAATCTCCCGCTTATA	TAGTTGGTGGGTTTCCCTACCGTGT	GGTCTCG	tata	CACGGTCGGGGGTGTCGTCC	gttt	tgagacc	GGTACAGTAAGTGAGAATCCTCTCT	GGTCTTGACAAACGTGTGCTTGTAC
PA14_30860	2680662..2680681	yes	TATGAGGACGAATCTCCCGCTTATA	TAGTTGGTGGGTTTCCCTACCGTGT	GGTCTCG	tata	TCAGCGGCAAGGCGGATTTG	gttt	tgagacc	GGTACAGTAAGTGAGAATCCTCTCT	GGTCTTGACAAACGTGTGCTTGTAC
PA14_30870	2681362..2681381	yes	TATGAGGACGAATCTCCCGCTTATA	TAGTTGGTGGGTTTCCCTACCGTGT	GGTCTCG	tata	GTGTCGGCGTAGCGCACCTG	gttt	tgagacc	GGTACAGTAAGTGAGAATCCTCTCT	GGTCTTGACAAACGTGTGCTTGTAC
PA14_30880	2682737..2682756	yes	TATGAGGACGAATCTCCCGCTTATA	TAGTTGGTGGGTTTCCCTACCGTGT	GGTCTCG	tata	TGGCGAAGGTGTTGAGGAAC	gttt	tgagacc	GGTACAGTAAGTGAGAATCCTCTCT	GGTCTTGACAAACGTGTGCTTGTAC
PA14_30890	2682997..2683016	yes	TATGAGGACGAATCTCCCGCTTATA	TAGTTGGTGGGTTTCCCTACCGTGT	GGTCTCG	tata	CGCCGATCCCGTGCGGCTCA	gttt	tgagacc	GGTACAGTAAGTGAGAATCCTCTCT	GGTCTTGACAAACGTGTGCTTGTAC
PA14_30900	2683803..2683822	yes	TATGAGGACGAATCTCCCGCTTATA	TAGTTGGTGGGTTTCCCTACCGTGT	GGTCTCG	tata	CCGCGATGGCAGCGGCGACA	gttt	tgagacc	GGTACAGTAAGTGAGAATCCTCTCT	GGTCTTGACAAACGTGTGCTTGTAC
PA14_30910	2686256..2686275	yes	TATGAGGACGAATCTCCCGCTTATA	TAGTTGGTGGGTTTCCCTACCGTGT	GGTCTCG	tata	GCCGCTGGCGGTATTCGGCA	gttt	tgagacc	GGTACAGTAAGTGAGAATCCTCTCT	GGTCTTGACAAACGTGTGCTTGTAC
PA14_30930	2686920..2686939	yes	TATGAGGACGAATCTCCCGCTTATA	TAGTTGGTGGGTTTCCCTACCGTGT	GGTCTCG	tata	TTTGCAGAAAAGCGGAAAGC	gttt	tgagacc	GGTACAGTAAGTGAGAATCCTCTCT	GGTCTTGACAAACGTGTGCTTGTAC
PA14_30940	2687998..2688017	yes	TATGAGGACGAATCTCCCGCTTATA	TAGTTGGTGGGTTTCCCTACCGTGT	GGTCTCG	tata	CTCGGGTGGCAACTGCGAAA	gttt	tgagacc	GGTACAGTAAGTGAGAATCCTCTCT	GGTCTTGACAAACGTGTGCTTGTAC
PA14_30950	2688461..2688480	yes	TATGAGGACGAATCTCCCGCTTATA	TAGTTGGTGGGTTTCCCTACCGTGT	GGTCTCG	tata	TAAAGAGGTTCAGGCGGTAG	gttt	tgagacc	GGTACAGTAAGTGAGAATCCTCTCT	GGTCTTGACAAACGTGTGCTTGTAC
PA14_30960	2690429..2690448	yes	TATGAGGACGAATCTCCCGCTTATA	TAGTTGGTGGGTTTCCCTACCGTGT	GGTCTCG	tata	GATCACGATGCCGAATACCA	gttt	tgagacc	GGTACAGTAAGTGAGAATCCTCTCT	GGTCTTGACAAACGTGTGCTTGTAC
PA14_30970	2691962..2691981	yes	TATGAGGACGAATCTCCCGCTTATA	TAGTTGGTGGGTTTCCCTACCGTGT	GGTCTCG	tata	CCGACATAGCACTTGCTTCT	gttt	tgagacc	GGTACAGTAAGTGAGAATCCTCTCT	GGTCTTGACAAACGTGTGCTTGTAC
PA14_30980	2692376..2692395	yes	TATGAGGACGAATCTCCCGCTTATA	TAGTTGGTGGGTTTCCCTACCGTGT	GGTCTCG	tata	GCCGGTCAGCAGTGCGGTGG	gttt	tgagacc	GGTACAGTAAGTGAGAATCCTCTCT	GGTCTTGACAAACGTGTGCTTGTAC
PA14_30990	2693125..2693144	yes	TATGAGGACGAATCTCCCGCTTATA	TAGTTGGTGGGTTTCCCTACCGTGT	GGTCTCG	tata	CGATTGCGGAGCAGGAATGT	gttt	tgagacc	GGTACAGTAAGTGAGAATCCTCTCT	GGTCTTGACAAACGTGTGCTTGTAC
PA14_31000	2693880..2693899	yes	TATGAGGACGAATCTCCCGCTTATA	TAGTTGGTGGGTTTCCCTACCGTGT	GGTCTCG	tata	AGGGAAATGGGAATGGGCAC	gttt	tgagacc	GGTACAGTAAGTGAGAATCCTCTCT	GGTCTTGACAAACGTGTGCTTGTAC
PA14_31010	2696994..2697013	yes	TATGAGGACGAATCTCCCGCTTATA	TAGTTGGTGGGTTTCCCTACCGTGT	GGTCTCG	tata	CACCAGCCAGCGATGCGCGA	gttt	tgagacc	GGTACAGTAAGTGAGAATCCTCTCT	GGTCTTGACAAACGTGTGCTTGTAC
PA14_31030	2698243..2698262	yes	TATGAGGACGAATCTCCCGCTTATA	TAGTTGGTGGGTTTCCCTACCGTGT	GGTCTCG	tata	GAACACGCAAAGGAGCAGCA	gttt	tgagacc	GGTACAGTAAGTGAGAATCCTCTCT	GGTCTTGACAAACGTGTGCTTGTAC
PA14_31040	2699492..2699511	yes	TATGAGGACGAATCTCCCGCTTATA	TAGTTGGTGGGTTTCCCTACCGTGT	GGTCTCG	tata	CGAACACCAAGGCCACTAAG	gttt	tgagacc	GGTACAGTAAGTGAGAATCCTCTCT	GGTCTTGACAAACGTGTGCTTGTAC
PA14_31050	2700625..2700644	yes	TATGAGGACGAATCTCCCGCTTATA	TAGTTGGTGGGTTTCCCTACCGTGT	GGTCTCG	tata	GCAATGCAAACTGAAGTAGT	gttt	tgagacc	GGTACAGTAAGTGAGAATCCTCTCT	GGTCTTGACAAACGTGTGCTTGTAC
PA14_31060,PA14_31070	2701249..2701268	yes	TATGAGGACGAATCTCCCGCTTATA	TAGTTGGTGGGTTTCCCTACCGTGT	GGTCTCG	tata	CCCAGCCGCTGCTCGATCAC	gttt	tgagacc	GGTACAGTAAGTGAGAATCCTCTCT	GGTCTTGACAAACGTGTGCTTGTAC
PA14_31070	2703482..2703501	yes	TATGAGGACGAATCTCCCGCTTATA	TAGTTGGTGGGTTTCCCTACCGTGT	GGTCTCG	tata	CGGCACCCGATACGTAGGAT	gttt	tgagacc	GGTACAGTAAGTGAGAATCCTCTCT	GGTCTTGACAAACGTGTGCTTGTAC
PA14_31080	2704153..2704172	yes	TATGAGGACGAATCTCCCGCTTATA	TAGTTGGTGGGTTTCCCTACCGTGT	GGTCTCG	tata	GTTGGCGCCAGTGGAAACGG	gttt	tgagacc	GGTACAGTAAGTGAGAATCCTCTCT	GGTCTTGACAAACGTGTGCTTGTAC
PA14_31090,PA14_31100	2705054..2705073	no	TATGAGGACGAATCTCCCGCTTATA	TAGTTGGTGGGTTTCCCTACCGTGT	GGTCTCG	tata	TCGCGCGCGGCGGCGCTGAC	gttt	tgagacc	GGTACAGTAAGTGAGAATCCTCTCT	GGTCTTGACAAACGTGTGCTTGTAC
PA14_31100	2705607..2705626	yes	TATGAGGACGAATCTCCCGCTTATA	TAGTTGGTGGGTTTCCCTACCGTGT	GGTCTCG	tata	TCTTGCCGACGCCCCCTTTC	gttt	tgagacc	GGTACAGTAAGTGAGAATCCTCTCT	GGTCTTGACAAACGTGTGCTTGTAC
PA14_31110,PA14_31130	2707194..2707213	yes	TATGAGGACGAATCTCCCGCTTATA	TAGTTGGTGGGTTTCCCTACCGTGT	GGTCTCG	tata	GTGGCGGAAGCTGTGCAAGG	gttt	tgagacc	GGTACAGTAAGTGAGAATCCTCTCT	GGTCTTGACAAACGTGTGCTTGTAC
PA14_31130	2707912..2707931	yes	TATGAGGACGAATCTCCCGCTTATA	TAGTTGGTGGGTTTCCCTACCGTGT	GGTCTCG	tata	GGCTGTCGGATACCAGTGGT	gttt	tgagacc	GGTACAGTAAGTGAGAATCCTCTCT	GGTCTTGACAAACGTGTGCTTGTAC
PA14_31150	2708665..2708684	yes	TATGAGGACGAATCTCCCGCTTATA	TAGTTGGTGGGTTTCCCTACCGTGT	GGTCTCG	tata	CGTGCATGCGTGTGGAAACA	gttt	tgagacc	GGTACAGTAAGTGAGAATCCTCTCT	GGTCTTGACAAACGTGTGCTTGTAC
PA14_31160	2708867..2708886	yes	TATGAGGACGAATCTCCCGCTTATA	TAGTTGGTGGGTTTCCCTACCGTGT	GGTCTCG	tata	GGACAGAAGCGTCAAATCGC	gttt	tgagacc	GGTACAGTAAGTGAGAATCCTCTCT	GGTCTTGACAAACGTGTGCTTGTAC
PA14_31170	2709247..2709266	yes	TATGAGGACGAATCTCCCGCTTATA	TAGTTGGTGGGTTTCCCTACCGTGT	GGTCTCG	tata	TATCCCCGCCGCGCTGCGCT	gttt	tgagacc	GGTACAGTAAGTGAGAATCCTCTCT	GGTCTTGACAAACGTGTGCTTGTAC
PA14_31180	2710576..2710595	yes	TATGAGGACGAATCTCCCGCTTATA	TAGTTGGTGGGTTTCCCTACCGTGT	GGTCTCG	tata	TTGGGCTTTGAAACCGGGCG	gttt	tgagacc	GGTACAGTAAGTGAGAATCCTCTCT	GGTCTTGACAAACGTGTGCTTGTAC
PA14_31190	2712970..2712989	yes	TATGAGGACGAATCTCCCGCTTATA	TAGTTGGTGGGTTTCCCTACCGTGT	GGTCTCG	tata	GCGGGCTTCGGTTTGGGTTA	gttt	tgagacc	GGTACAGTAAGTGAGAATCCTCTCT	GGTCTTGACAAACGTGTGCTTGTAC
PA14_31200	2713870..2713889	yes	TATGAGGACGAATCTCCCGCTTATA	TAGTTGGTGGGTTTCCCTACCGTGT	GGTCTCG	tata	CGGGGAACGGGAAGCGAAAC	gttt	tgagacc	GGTACAGTAAGTGAGAATCCTCTCT	GGTCTTGACAAACGTGTGCTTGTAC
PA14_31220	2714873..2714892	yes	TATGAGGACGAATCTCCCGCTTATA	TAGTTGGTGGGTTTCCCTACCGTGT	GGTCTCG	tata	TTTCGATGATGTAGTCGTGA	gttt	tgagacc	GGTACAGTAAGTGAGAATCCTCTCT	GGTCTTGACAAACGTGTGCTTGTAC
PA14_31230	2715406..2715425	yes	TATGAGGACGAATCTCCCGCTTATA	TAGTTGGTGGGTTTCCCTACCGTGT	GGTCTCG	tata	CGCCAGGACGCAAGCGCCAT	gttt	tgagacc	GGTACAGTAAGTGAGAATCCTCTCT	GGTCTTGACAAACGTGTGCTTGTAC
PA14_31240	2716910..2716929	yes	TATGAGGACGAATCTCCCGCTTATA	TAGTTGGTGGGTTTCCCTACCGTGT	GGTCTCG	tata	GGCGATAGGTGCGGTTCTTA	gttt	tgagacc	GGTACAGTAAGTGAGAATCCTCTCT	GGTCTTGACAAACGTGTGCTTGTAC
PA14_31250	2717694..2717713	yes	TATGAGGACGAATCTCCCGCTTATA	TAGTTGGTGGGTTTCCCTACCGTGT	GGTCTCG	tata	CAGGCAAACGTGCTGTTCGA	gttt	tgagacc	GGTACAGTAAGTGAGAATCCTCTCT	GGTCTTGACAAACGTGTGCTTGTAC
PA14_31260	2718486..2718505	yes	TATGAGGACGAATCTCCCGCTTATA	TAGTTGGTGGGTTTCCCTACCGTGT	GGTCTCG	tata	CAACGGGGTATCGAGAGAGA	gttt	tgagacc	GGTACAGTAAGTGAGAATCCTCTCT	GGTCTTGACAAACGTGTGCTTGTAC
PA14_31270	2719981..2720000	yes	TATGAGGACGAATCTCCCGCTTATA	TAGTTGGTGGGTTTCCCTACCGTGT	GGTCTCG	tata	CTTTGGCGGCCTTGGGCGTC	gttt	tgagacc	GGTACAGTAAGTGAGAATCCTCTCT	GGTCTTGACAAACGTGTGCTTGTAC
PA14_31280	2721172..2721191	yes	TATGAGGACGAATCTCCCGCTTATA	TAGTTGGTGGGTTTCCCTACCGTGT	GGTCTCG	tata	TGCCGTGTCAACGACGGACT	gttt	tgagacc	GGTACAGTAAGTGAGAATCCTCTCT	GGTCTTGACAAACGTGTGCTTGTAC
PA14_31290	2721930..2721949	yes	TATGAGGACGAATCTCCCGCTTATA	TAGTTGGTGGGTTTCCCTACCGTGT	GGTCTCG	tata	ACGATGGTAATGACATCGCC	gttt	tgagacc	GGTACAGTAAGTGAGAATCCTCTCT	GGTCTTGACAAACGTGTGCTTGTAC
PA14_31300	2722509..2722528	yes	TATGAGGACGAATCTCCCGCTTATA	TAGTTGGTGGGTTTCCCTACCGTGT	GGTCTCG	tata	ACAATCAGGGAAAGTCGGCA	gttt	tgagacc	GGTACAGTAAGTGAGAATCCTCTCT	GGTCTTGACAAACGTGTGCTTGTAC
PA14_31310	2722974..2722993	yes	TATGAGGACGAATCTCCCGCTTATA	TAGTTGGTGGGTTTCCCTACCGTGT	GGTCTCG	tata	CCGCCTCTGGGGTCTTGTAT	gttt	tgagacc	GGTACAGTAAGTGAGAATCCTCTCT	GGTCTTGACAAACGTGTGCTTGTAC
PA14_31330	2724902..2724921	yes	TATGAGGACGAATCTCCCGCTTATA	TAGTTGGTGGGTTTCCCTACCGTGT	GGTCTCG	tata	GCGCGGGTCGAGGGTGGCGT	gttt	tgagacc	GGTACAGTAAGTGAGAATCCTCTCT	GGTCTTGACAAACGTGTGCTTGTAC
PA14_31340	2725326..2725345	yes	TATGAGGACGAATCTCCCGCTTATA	TAGTTGGTGGGTTTCCCTACCGTGT	GGTCTCG	tata	GTCGGCGTCGAAGGCCCTAC	gttt	tgagacc	GGTACAGTAAGTGAGAATCCTCTCT	GGTCTTGACAAACGTGTGCTTGTAC
PA14_31350	2726014..2726033	yes	TATGAGGACGAATCTCCCGCTTATA	TAGTTGGTGGGTTTCCCTACCGTGT	GGTCTCG	tata	TTCGAGGAAGAATTGCTCGA	gttt	tgagacc	GGTACAGTAAGTGAGAATCCTCTCT	GGTCTTGACAAACGTGTGCTTGTAC
PA14_31360	2727072..2727091	yes	TATGAGGACGAATCTCCCGCTTATA	TAGTTGGTGGGTTTCCCTACCGTGT	GGTCTCG	tata	GCGACGCGTATGGCTGCTGA	gttt	tgagacc	GGTACAGTAAGTGAGAATCCTCTCT	GGTCTTGACAAACGTGTGCTTGTAC
PA14_31370	2727490..2727509	yes	TATGAGGACGAATCTCCCGCTTATA	TAGTTGGTGGGTTTCCCTACCGTGT	GGTCTCG	tata	GATCCGCACGATCTCGGAGA	gttt	tgagacc	GGTACAGTAAGTGAGAATCCTCTCT	GGTCTTGACAAACGTGTGCTTGTAC
PA14_31380	2729747..2729766	yes	TATGAGGACGAATCTCCCGCTTATA	TAGTTGGTGGGTTTCCCTACCGTGT	GGTCTCG	tata	GAGCAGGTCGCCGCGAATAT	gttt	tgagacc	GGTACAGTAAGTGAGAATCCTCTCT	GGTCTTGACAAACGTGTGCTTGTAC
PA14_31390	2730191..2730210	yes	TATGAGGACGAATCTCCCGCTTATA	TAGTTGGTGGGTTTCCCTACCGTGT	GGTCTCG	tata	GCGTACCGCCGAGCAGAGAC	gttt	tgagacc	GGTACAGTAAGTGAGAATCCTCTCT	GGTCTTGACAAACGTGTGCTTGTAC
PA14_31400	2732475..2732494	yes	TATGAGGACGAATCTCCCGCTTATA	TAGTTGGTGGGTTTCCCTACCGTGT	GGTCTCG	tata	GGCGGGCGTGGCGCGTGTTC	gttt	tgagacc	GGTACAGTAAGTGAGAATCCTCTCT	GGTCTTGACAAACGTGTGCTTGTAC
PA14_31420	2732663..2732682	yes	TATGAGGACGAATCTCCCGCTTATA	TAGTTGGTGGGTTTCCCTACCGTGT	GGTCTCG	tata	GTTCATCCTGAACGGTGGGA	gttt	tgagacc	GGTACAGTAAGTGAGAATCCTCTCT	GGTCTTGACAAACGTGTGCTTGTAC
PA14_31430	2733213..2733232	yes	TATGAGGACGAATCTCCCGCTTATA	TAGTTGGTGGGTTTCCCTACCGTGT	GGTCTCG	tata	CGCCGGGTGTACTTGTCCTG	gttt	tgagacc	GGTACAGTAAGTGAGAATCCTCTCT	GGTCTTGACAAACGTGTGCTTGTAC
PA14_31440	2733627..2733646	yes	TATGAGGACGAATCTCCCGCTTATA	TAGTTGGTGGGTTTCCCTACCGTGT	GGTCTCG	tata	CTCGGGCTGATAGCCACTGC	gttt	tgagacc	GGTACAGTAAGTGAGAATCCTCTCT	GGTCTTGACAAACGTGTGCTTGTAC
PA14_31450	2734240..2734259	yes	TATGAGGACGAATCTCCCGCTTATA	TAGTTGGTGGGTTTCCCTACCGTGT	GGTCTCG	tata	CCAGGCTACCTTCGTCCCAG	gttt	tgagacc	GGTACAGTAAGTGAGAATCCTCTCT	GGTCTTGACAAACGTGTGCTTGTAC
PA14_31460	2735094..2735113	yes	TATGAGGACGAATCTCCCGCTTATA	TAGTTGGTGGGTTTCCCTACCGTGT	GGTCTCG	tata	CAGGCCGATGGCGATTTCCG	gttt	tgagacc	GGTACAGTAAGTGAGAATCCTCTCT	GGTCTTGACAAACGTGTGCTTGTAC
PA14_31470	2735353..2735372	yes	TATGAGGACGAATCTCCCGCTTATA	TAGTTGGTGGGTTTCCCTACCGTGT	GGTCTCG	tata	TGGCGACCCGAGGTATAGCT	gttt	tgagacc	GGTACAGTAAGTGAGAATCCTCTCT	GGTCTTGACAAACGTGTGCTTGTAC
PA14_31480	2737138..2737157	no	TATGAGGACGAATCTCCCGCTTATA	TAGTTGGTGGGTTTCCCTACCGTGT	GGTCTCG	tata	GCGCACCGAGATGGTGCCCT	gttt	tgagacc	GGTACAGTAAGTGAGAATCCTCTCT	GGTCTTGACAAACGTGTGCTTGTAC
PA14_31500	2738382..2738401	yes	TATGAGGACGAATCTCCCGCTTATA	TAGTTGGTGGGTTTCCCTACCGTGT	GGTCTCG	tata	GTCGAACCCGGCGGCAGTGG	gttt	tgagacc	GGTACAGTAAGTGAGAATCCTCTCT	GGTCTTGACAAACGTGTGCTTGTAC
PA14_31510	2740079..2740098	yes	TATGAGGACGAATCTCCCGCTTATA	TAGTTGGTGGGTTTCCCTACCGTGT	GGTCTCG	tata	CGGAGCTACCGCCGGTGACC	gttt	tgagacc	GGTACAGTAAGTGAGAATCCTCTCT	GGTCTTGACAAACGTGTGCTTGTAC
PA14_31530	2740845..2740864	yes	TATGAGGACGAATCTCCCGCTTATA	TAGTTGGTGGGTTTCCCTACCGTGT	GGTCTCG	tata	GATGACGATCGGATCTTCGC	gttt	tgagacc	GGTACAGTAAGTGAGAATCCTCTCT	GGTCTTGACAAACGTGTGCTTGTAC
PA14_31540	2742066..2742085	yes	TATGAGGACGAATCTCCCGCTTATA	TAGTTGGTGGGTTTCCCTACCGTGT	GGTCTCG	tata	ATCTGGATCTCTTCTTCGCA	gttt	tgagacc	GGTACAGTAAGTGAGAATCCTCTCT	GGTCTTGACAAACGTGTGCTTGTAC
PA14_31560	2744206..2744225	yes	TATGAGGACGAATCTCCCGCTTATA	TAGTTGGTGGGTTTCCCTACCGTGT	GGTCTCG	tata	GGTTCAGGTCGACTTTGTTC	gttt	tgagacc	GGTACAGTAAGTGAGAATCCTCTCT	GGTCTTGACAAACGTGTGCTTGTAC
PA14_31580	2744420..2744439	yes	TATGAGGACGAATCTCCCGCTTATA	TAGTTGGTGGGTTTCCCTACCGTGT	GGTCTCG	tata	CTCCTGGACCTTGGGGGAAT	gttt	tgagacc	GGTACAGTAAGTGAGAATCCTCTCT	GGTCTTGACAAACGTGTGCTTGTAC
PA14_31610	2746823..2746842	yes	TATGAGGACGAATCTCCCGCTTATA	TAGTTGGTGGGTTTCCCTACCGTGT	GGTCTCG	tata	AGCCGTACCGAGGAACGGTT	gttt	tgagacc	GGTACAGTAAGTGAGAATCCTCTCT	GGTCTTGACAAACGTGTGCTTGTAC
PA14_31620	2748389..2748408	yes	TATGAGGACGAATCTCCCGCTTATA	TAGTTGGTGGGTTTCCCTACCGTGT	GGTCTCG	tata	CGCTGGCGGTGTGGCATCGC	gttt	tgagacc	GGTACAGTAAGTGAGAATCCTCTCT	GGTCTTGACAAACGTGTGCTTGTAC
PA14_31630	2749349..2749368	yes	TATGAGGACGAATCTCCCGCTTATA	TAGTTGGTGGGTTTCCCTACCGTGT	GGTCTCG	tata	GGAAGACCTTGAGGGCGGTG	gttt	tgagacc	GGTACAGTAAGTGAGAATCCTCTCT	GGTCTTGACAAACGTGTGCTTGTAC
PA14_31640	2749498..2749517	yes	TATGAGGACGAATCTCCCGCTTATA	TAGTTGGTGGGTTTCCCTACCGTGT	GGTCTCG	tata	TCGAGACGTTCGACGACGAA	gttt	tgagacc	GGTACAGTAAGTGAGAATCCTCTCT	GGTCTTGACAAACGTGTGCTTGTAC
PA14_31650	2750774..2750793	yes	TATGAGGACGAATCTCCCGCTTATA	TAGTTGGTGGGTTTCCCTACCGTGT	GGTCTCG	tata	CGCCGCCAGCTGGTGCGGCC	gttt	tgagacc	GGTACAGTAAGTGAGAATCCTCTCT	GGTCTTGACAAACGTGTGCTTGTAC
PA14_31660	2750985..2751004	yes	TATGAGGACGAATCTCCCGCTTATA	TAGTTGGTGGGTTTCCCTACCGTGT	GGTCTCG	tata	GATTGGTCGAGCGGATGGCC	gttt	tgagacc	GGTACAGTAAGTGAGAATCCTCTCT	GGTCTTGACAAACGTGTGCTTGTAC
PA14_31680	2751851..2751870	yes	TATGAGGACGAATCTCCCGCTTATA	TAGTTGGTGGGTTTCCCTACCGTGT	GGTCTCG	tata	GCAGCCCGGCCAGCGGGAAC	gttt	tgagacc	GGTACAGTAAGTGAGAATCCTCTCT	GGTCTTGACAAACGTGTGCTTGTAC
PA14_31690	2753583..2753602	yes	TATGAGGACGAATCTCCCGCTTATA	TAGTTGGTGGGTTTCCCTACCGTGT	GGTCTCG	tata	CAGCCCGACTATGGCCAGCA	gttt	tgagacc	GGTACAGTAAGTGAGAATCCTCTCT	GGTCTTGACAAACGTGTGCTTGTAC
PA14_31700	2757371..2757390	yes	TATGAGGACGAATCTCCCGCTTATA	TAGTTGGTGGGTTTCCCTACCGTGT	GGTCTCG	tata	GCGCGGTTTGAGTTGATAGA	gttt	tgagacc	GGTACAGTAAGTGAGAATCCTCTCT	GGTCTTGACAAACGTGTGCTTGTAC
PA14_31720	2758117..2758136	yes	TATGAGGACGAATCTCCCGCTTATA	TAGTTGGTGGGTTTCCCTACCGTGT	GGTCTCG	tata	GAGTTCTACCCCGTCGTGGG	gttt	tgagacc	GGTACAGTAAGTGAGAATCCTCTCT	GGTCTTGACAAACGTGTGCTTGTAC
PA14_31730	2759908..2759927	yes	TATGAGGACGAATCTCCCGCTTATA	TAGTTGGTGGGTTTCCCTACCGTGT	GGTCTCG	tata	CATAGCTGGCGAAGAAGAAC	gttt	tgagacc	GGTACAGTAAGTGAGAATCCTCTCT	GGTCTTGACAAACGTGTGCTTGTAC
PA14_31730,PA14_31740	2761194..2761213	yes	TATGAGGACGAATCTCCCGCTTATA	TAGTTGGTGGGTTTCCCTACCGTGT	GGTCTCG	tata	ACCAGGGCCAGGGATTGCTC	gttt	tgagacc	GGTACAGTAAGTGAGAATCCTCTCT	GGTCTTGACAAACGTGTGCTTGTAC
PA14_31750	2761674..2761693	yes	TATGAGGACGAATCTCCCGCTTATA	TAGTTGGTGGGTTTCCCTACCGTGT	GGTCTCG	tata	GGCGCCGGCGATGATGCCAT	gttt	tgagacc	GGTACAGTAAGTGAGAATCCTCTCT	GGTCTTGACAAACGTGTGCTTGTAC
PA14_31760	2762299..2762318	yes	TATGAGGACGAATCTCCCGCTTATA	TAGTTGGTGGGTTTCCCTACCGTGT	GGTCTCG	tata	GATCCCGCCGAAGAGCATCC	gttt	tgagacc	GGTACAGTAAGTGAGAATCCTCTCT	GGTCTTGACAAACGTGTGCTTGTAC
PA14_31770	2764373..2764392	yes	TATGAGGACGAATCTCCCGCTTATA	TAGTTGGTGGGTTTCCCTACCGTGT	GGTCTCG	tata	GCCGTTGTGGCCGAGTTGAC	gttt	tgagacc	GGTACAGTAAGTGAGAATCCTCTCT	GGTCTTGACAAACGTGTGCTTGTAC
PA14_31780	2764535..2764554	yes	TATGAGGACGAATCTCCCGCTTATA	TAGTTGGTGGGTTTCCCTACCGTGT	GGTCTCG	tata	GGGTGAAGGCCTGCATGGCC	gttt	tgagacc	GGTACAGTAAGTGAGAATCCTCTCT	GGTCTTGACAAACGTGTGCTTGTAC
PA14_31800	2765620..2765639	yes	TATGAGGACGAATCTCCCGCTTATA	TAGTTGGTGGGTTTCCCTACCGTGT	GGTCTCG	tata	GCCCCCAGACCACGCCGTTC	gttt	tgagacc	GGTACAGTAAGTGAGAATCCTCTCT	GGTCTTGACAAACGTGTGCTTGTAC
PA14_31810	2767101..2767120	yes	TATGAGGACGAATCTCCCGCTTATA	TAGTTGGTGGGTTTCCCTACCGTGT	GGTCTCG	tata	GCTGGCCATCGACGTTGACC	gttt	tgagacc	GGTACAGTAAGTGAGAATCCTCTCT	GGTCTTGACAAACGTGTGCTTGTAC
PA14_31820	2768818..2768837	yes	TATGAGGACGAATCTCCCGCTTATA	TAGTTGGTGGGTTTCCCTACCGTGT	GGTCTCG	tata	AACGAACGACGACTCAAAGC	gttt	tgagacc	GGTACAGTAAGTGAGAATCCTCTCT	GGTCTTGACAAACGTGTGCTTGTAC
PA14_31840	2770338..2770357	yes	TATGAGGACGAATCTCCCGCTTATA	TAGTTGGTGGGTTTCCCTACCGTGT	GGTCTCG	tata	GGGCTTCGAAATGCTGTCTC	gttt	tgagacc	GGTACAGTAAGTGAGAATCCTCTCT	GGTCTTGACAAACGTGTGCTTGTAC
PA14_31850	2771768..2771787	yes	TATGAGGACGAATCTCCCGCTTATA	TAGTTGGTGGGTTTCCCTACCGTGT	GGTCTCG	tata	CCGCGAAGCGGTGTTTCAAC	gttt	tgagacc	GGTACAGTAAGTGAGAATCCTCTCT	GGTCTTGACAAACGTGTGCTTGTAC
PA14_31870	2772064..2772083	yes	TATGAGGACGAATCTCCCGCTTATA	TAGTTGGTGGGTTTCCCTACCGTGT	GGTCTCG	tata	AACTTGGATTTACCGGTCGT	gttt	tgagacc	GGTACAGTAAGTGAGAATCCTCTCT	GGTCTTGACAAACGTGTGCTTGTAC
PA14_31890	2773340..2773359	yes	TATGAGGACGAATCTCCCGCTTATA	TAGTTGGTGGGTTTCCCTACCGTGT	GGTCTCG	tata	GCAGGATGAACGGGCGGGAC	gttt	tgagacc	GGTACAGTAAGTGAGAATCCTCTCT	GGTCTTGACAAACGTGTGCTTGTAC
PA14_31900	2776468..2776487	no	TATGAGGACGAATCTCCCGCTTATA	TAGTTGGTGGGTTTCCCTACCGTGT	GGTCTCG	tata	GGCGGATGAAGGGCGTGGAC	gttt	tgagacc	GGTACAGTAAGTGAGAATCCTCTCT	GGTCTTGACAAACGTGTGCTTGTAC
PA14_31920	2779580..2779599	yes	TATGAGGACGAATCTCCCGCTTATA	TAGTTGGTGGGTTTCCCTACCGTGT	GGTCTCG	tata	GGCCAGGGCGAGCAACGAGG	gttt	tgagacc	GGTACAGTAAGTGAGAATCCTCTCT	GGTCTTGACAAACGTGTGCTTGTAC
PA14_31930	2781128..2781147	yes	TATGAGGACGAATCTCCCGCTTATA	TAGTTGGTGGGTTTCCCTACCGTGT	GGTCTCG	tata	TCTAGCCGAGACGCGGACGG	gttt	tgagacc	GGTACAGTAAGTGAGAATCCTCTCT	GGTCTTGACAAACGTGTGCTTGTAC
PA14_31950	2782829..2782848	yes	TATGAGGACGAATCTCCCGCTTATA	TAGTTGGTGGGTTTCCCTACCGTGT	GGTCTCG	tata	CGCAGCGACAGTCGGCCTGG	gttt	tgagacc	GGTACAGTAAGTGAGAATCCTCTCT	GGTCTTGACAAACGTGTGCTTGTAC
PA14_31960	2783498..2783517	yes	TATGAGGACGAATCTCCCGCTTATA	TAGTTGGTGGGTTTCCCTACCGTGT	GGTCTCG	tata	TGACTTCATCTTCGATAATA	gttt	tgagacc	GGTACAGTAAGTGAGAATCCTCTCT	GGTCTTGACAAACGTGTGCTTGTAC
PA14_31970	2784047..2784066	yes	TATGAGGACGAATCTCCCGCTTATA	TAGTTGGTGGGTTTCCCTACCGTGT	GGTCTCG	tata	CTGGCCAGTGGCCGAAGTAT	gttt	tgagacc	GGTACAGTAAGTGAGAATCCTCTCT	GGTCTTGACAAACGTGTGCTTGTAC
PA14_31990	2785411..2785430	yes	TATGAGGACGAATCTCCCGCTTATA	TAGTTGGTGGGTTTCCCTACCGTGT	GGTCTCG	tata	CAGGCCGAGCAGTGCCAGTG	gttt	tgagacc	GGTACAGTAAGTGAGAATCCTCTCT	GGTCTTGACAAACGTGTGCTTGTAC
PA14_32015	2786877..2786896	yes	TATGAGGACGAATCTCCCGCTTATA	TAGTTGGTGGGTTTCCCTACCGTGT	GGTCTCG	tata	AGCGTTGCTCGATGGCGAAT	gttt	tgagacc	GGTACAGTAAGTGAGAATCCTCTCT	GGTCTTGACAAACGTGTGCTTGTAC
PA14_32025	2787936..2787955	yes	TATGAGGACGAATCTCCCGCTTATA	TAGTTGGTGGGTTTCCCTACCGTGT	GGTCTCG	tata	CGCGGATGTTGCCGAGGAAC	gttt	tgagacc	GGTACAGTAAGTGAGAATCCTCTCT	GGTCTTGACAAACGTGTGCTTGTAC
PA14_32060	2790229..2790248	yes	TATGAGGACGAATCTCCCGCTTATA	TAGTTGGTGGGTTTCCCTACCGTGT	GGTCTCG	tata	GCTGCGCTCGCTGAGCAAGG	gttt	tgagacc	GGTACAGTAAGTGAGAATCCTCTCT	GGTCTTGACAAACGTGTGCTTGTAC
PA14_32080	2791299..2791318	yes	TATGAGGACGAATCTCCCGCTTATA	TAGTTGGTGGGTTTCCCTACCGTGT	GGTCTCG	tata	ACGCAAGTAATCGCTACCCA	gttt	tgagacc	GGTACAGTAAGTGAGAATCCTCTCT	GGTCTTGACAAACGTGTGCTTGTAC
PA14_32100	2792664..2792683	no	TATGAGGACGAATCTCCCGCTTATA	TAGTTGGTGGGTTTCCCTACCGTGT	GGTCTCG	tata	CGCGCAGGGCGTCGTAGCCC	gttt	tgagacc	GGTACAGTAAGTGAGAATCCTCTCT	GGTCTTGACAAACGTGTGCTTGTAC
PA14_32110	2793186..2793205	yes	TATGAGGACGAATCTCCCGCTTATA	TAGTTGGTGGGTTTCCCTACCGTGT	GGTCTCG	tata	CGAAGTTGAGTGCGATCCGA	gttt	tgagacc	GGTACAGTAAGTGAGAATCCTCTCT	GGTCTTGACAAACGTGTGCTTGTAC
PA14_32130	2794234..2794253	yes	TATGAGGACGAATCTCCCGCTTATA	TAGTTGGTGGGTTTCCCTACCGTGT	GGTCTCG	tata	TGACCAGGGCGACCTTGTCG	gttt	tgagacc	GGTACAGTAAGTGAGAATCCTCTCT	GGTCTTGACAAACGTGTGCTTGTAC
PA14_32140	2795968..2795987	yes	TATGAGGACGAATCTCCCGCTTATA	TAGTTGGTGGGTTTCCCTACCGTGT	GGTCTCG	tata	CTTGCCGTCGGCGAAGCTGA	gttt	tgagacc	GGTACAGTAAGTGAGAATCCTCTCT	GGTCTTGACAAACGTGTGCTTGTAC
PA14_32150	2796487..2796506	yes	TATGAGGACGAATCTCCCGCTTATA	TAGTTGGTGGGTTTCCCTACCGTGT	GGTCTCG	tata	TTCGACGCGGTACTGCAGTC	gttt	tgagacc	GGTACAGTAAGTGAGAATCCTCTCT	GGTCTTGACAAACGTGTGCTTGTAC
PA14_32160	2797875..2797894	yes	TATGAGGACGAATCTCCCGCTTATA	TAGTTGGTGGGTTTCCCTACCGTGT	GGTCTCG	tata	CCACTGTTCCAGGCTTCTGC	gttt	tgagacc	GGTACAGTAAGTGAGAATCCTCTCT	GGTCTTGACAAACGTGTGCTTGTAC
PA14_32190	2798238..2798257	yes	TATGAGGACGAATCTCCCGCTTATA	TAGTTGGTGGGTTTCCCTACCGTGT	GGTCTCG	tata	CGCCACGATCGGCGACGGGA	gttt	tgagacc	GGTACAGTAAGTGAGAATCCTCTCT	GGTCTTGACAAACGTGTGCTTGTAC
PA14_32200	2800070..2800089	yes	TATGAGGACGAATCTCCCGCTTATA	TAGTTGGTGGGTTTCCCTACCGTGT	GGTCTCG	tata	CCAGCGCCTGGAAGTAGCGC	gttt	tgagacc	GGTACAGTAAGTGAGAATCCTCTCT	GGTCTTGACAAACGTGTGCTTGTAC
PA14_32220	2800276..2800295	yes	TATGAGGACGAATCTCCCGCTTATA	TAGTTGGTGGGTTTCCCTACCGTGT	GGTCTCG	tata	CGAGGCTTTGGATCACGGCT	gttt	tgagacc	GGTACAGTAAGTGAGAATCCTCTCT	GGTCTTGACAAACGTGTGCTTGTAC
PA14_32230	2801432..2801451	yes	TATGAGGACGAATCTCCCGCTTATA	TAGTTGGTGGGTTTCCCTACCGTGT	GGTCTCG	tata	ACTTCACGGTCATCTTCACG	gttt	tgagacc	GGTACAGTAAGTGAGAATCCTCTCT	GGTCTTGACAAACGTGTGCTTGTAC
PA14_32240	2801763..2801782	yes	TATGAGGACGAATCTCCCGCTTATA	TAGTTGGTGGGTTTCCCTACCGTGT	GGTCTCG	tata	GGCAGTCTGGGAAATCTTCA	gttt	tgagacc	GGTACAGTAAGTGAGAATCCTCTCT	GGTCTTGACAAACGTGTGCTTGTAC
PA14_32250	2803031..2803050	yes	TATGAGGACGAATCTCCCGCTTATA	TAGTTGGTGGGTTTCCCTACCGTGT	GGTCTCG	tata	GCAGGGCGGCCAGCAGCATC	gttt	tgagacc	GGTACAGTAAGTGAGAATCCTCTCT	GGTCTTGACAAACGTGTGCTTGTAC
PA14_32270	2803500..2803519	yes	TATGAGGACGAATCTCCCGCTTATA	TAGTTGGTGGGTTTCCCTACCGTGT	GGTCTCG	tata	CTCGGCGTTCTCCTCGGCGA	gttt	tgagacc	GGTACAGTAAGTGAGAATCCTCTCT	GGTCTTGACAAACGTGTGCTTGTAC
PA14_32280	2805032..2805051	yes	TATGAGGACGAATCTCCCGCTTATA	TAGTTGGTGGGTTTCCCTACCGTGT	GGTCTCG	tata	GGCGTCCACCAAGGTCCACG	gttt	tgagacc	GGTACAGTAAGTGAGAATCCTCTCT	GGTCTTGACAAACGTGTGCTTGTAC
PA14_32290	2806867..2806886	yes	TATGAGGACGAATCTCCCGCTTATA	TAGTTGGTGGGTTTCCCTACCGTGT	GGTCTCG	tata	CAGGAGTTGGCGTTCGGCGG	gttt	tgagacc	GGTACAGTAAGTGAGAATCCTCTCT	GGTCTTGACAAACGTGTGCTTGTAC
PA14_32300	2806866..2806885	yes	TATGAGGACGAATCTCCCGCTTATA	TAGTTGGTGGGTTTCCCTACCGTGT	GGTCTCG	tata	CGCCGAACGCCAACTCCTGC	gttt	tgagacc	GGTACAGTAAGTGAGAATCCTCTCT	GGTCTTGACAAACGTGTGCTTGTAC
PA14_32310	2808471..2808490	yes	TATGAGGACGAATCTCCCGCTTATA	TAGTTGGTGGGTTTCCCTACCGTGT	GGTCTCG	tata	GATTGCGAAAGTGACGCCGT	gttt	tgagacc	GGTACAGTAAGTGAGAATCCTCTCT	GGTCTTGACAAACGTGTGCTTGTAC
PA14_32330	2809862..2809881	yes	TATGAGGACGAATCTCCCGCTTATA	TAGTTGGTGGGTTTCCCTACCGTGT	GGTCTCG	tata	TGGCGGCCTGGCCGCCGGAA	gttt	tgagacc	GGTACAGTAAGTGAGAATCCTCTCT	GGTCTTGACAAACGTGTGCTTGTAC
PA14_32340	2810324..2810343	yes	TATGAGGACGAATCTCCCGCTTATA	TAGTTGGTGGGTTTCCCTACCGTGT	GGTCTCG	tata	CTCGCGCATGAAGGTTTCAT	gttt	tgagacc	GGTACAGTAAGTGAGAATCCTCTCT	GGTCTTGACAAACGTGTGCTTGTAC
PA14_32350	2810947..2810966	yes	TATGAGGACGAATCTCCCGCTTATA	TAGTTGGTGGGTTTCCCTACCGTGT	GGTCTCG	tata	TGCTCCGGCGTCGCTCGCGC	gttt	tgagacc	GGTACAGTAAGTGAGAATCCTCTCT	GGTCTTGACAAACGTGTGCTTGTAC
PA14_32360	2811145..2811164	yes	TATGAGGACGAATCTCCCGCTTATA	TAGTTGGTGGGTTTCCCTACCGTGT	GGTCTCG	tata	CGCTGACGAAGGTACGGAGC	gttt	tgagacc	GGTACAGTAAGTGAGAATCCTCTCT	GGTCTTGACAAACGTGTGCTTGTAC
PA14_32370	2812072..2812091	yes	TATGAGGACGAATCTCCCGCTTATA	TAGTTGGTGGGTTTCCCTACCGTGT	GGTCTCG	tata	GTCGACTTGCAGGTTGGGTC	gttt	tgagacc	GGTACAGTAAGTGAGAATCCTCTCT	GGTCTTGACAAACGTGTGCTTGTAC
PA14_32380	2814115..2814134	yes	TATGAGGACGAATCTCCCGCTTATA	TAGTTGGTGGGTTTCCCTACCGTGT	GGTCTCG	tata	GGGCGGGCGCGAGCCCGCTC	gttt	tgagacc	GGTACAGTAAGTGAGAATCCTCTCT	GGTCTTGACAAACGTGTGCTTGTAC
PA14_32390	2817309..2817328	yes	TATGAGGACGAATCTCCCGCTTATA	TAGTTGGTGGGTTTCCCTACCGTGT	GGTCTCG	tata	TCGGCCGCTGGATGAAGAAT	gttt	tgagacc	GGTACAGTAAGTGAGAATCCTCTCT	GGTCTTGACAAACGTGTGCTTGTAC
PA14_32400	2818573..2818592	no	TATGAGGACGAATCTCCCGCTTATA	TAGTTGGTGGGTTTCCCTACCGTGT	GGTCTCG	tata	GGGGTAGCGCCAGGAGAAGT	gttt	tgagacc	GGTACAGTAAGTGAGAATCCTCTCT	GGTCTTGACAAACGTGTGCTTGTAC
PA14_32410	2819726..2819745	yes	TATGAGGACGAATCTCCCGCTTATA	TAGTTGGTGGGTTTCCCTACCGTGT	GGTCTCG	tata	CGACGCGGCGCAGGTCGTTT	gttt	tgagacc	GGTACAGTAAGTGAGAATCCTCTCT	GGTCTTGACAAACGTGTGCTTGTAC
PA14_32420	2819981..2820000	yes	TATGAGGACGAATCTCCCGCTTATA	TAGTTGGTGGGTTTCCCTACCGTGT	GGTCTCG	tata	CTGATGAAAACGGATCACTC	gttt	tgagacc	GGTACAGTAAGTGAGAATCCTCTCT	GGTCTTGACAAACGTGTGCTTGTAC
PA14_32440	2821400..2821419	yes	TATGAGGACGAATCTCCCGCTTATA	TAGTTGGTGGGTTTCCCTACCGTGT	GGTCTCG	tata	GATCGCTTGGGTTGTGCTGG	gttt	tgagacc	GGTACAGTAAGTGAGAATCCTCTCT	GGTCTTGACAAACGTGTGCTTGTAC
PA14_32450	2822295..2822314	yes	TATGAGGACGAATCTCCCGCTTATA	TAGTTGGTGGGTTTCCCTACCGTGT	GGTCTCG	tata	AGTCGCGGGGCGTATTGGCG	gttt	tgagacc	GGTACAGTAAGTGAGAATCCTCTCT	GGTCTTGACAAACGTGTGCTTGTAC
PA14_32460	2823088..2823107	yes	TATGAGGACGAATCTCCCGCTTATA	TAGTTGGTGGGTTTCCCTACCGTGT	GGTCTCG	tata	AGCGGGACGGGCAGGGGGGC	gttt	tgagacc	GGTACAGTAAGTGAGAATCCTCTCT	GGTCTTGACAAACGTGTGCTTGTAC
PA14_32470	2823224..2823243	yes	TATGAGGACGAATCTCCCGCTTATA	TAGTTGGTGGGTTTCCCTACCGTGT	GGTCTCG	tata	TCGGTCGGGAAGGATGTCTT	gttt	tgagacc	GGTACAGTAAGTGAGAATCCTCTCT	GGTCTTGACAAACGTGTGCTTGTAC
PA14_32480	2823674..2823693	yes	TATGAGGACGAATCTCCCGCTTATA	TAGTTGGTGGGTTTCCCTACCGTGT	GGTCTCG	tata	GGTCGGGGCCTTGCGGGAGC	gttt	tgagacc	GGTACAGTAAGTGAGAATCCTCTCT	GGTCTTGACAAACGTGTGCTTGTAC
PA14_32490	2823970..2823989	yes	TATGAGGACGAATCTCCCGCTTATA	TAGTTGGTGGGTTTCCCTACCGTGT	GGTCTCG	tata	CCAGCCTTGCGACTGTTCGC	gttt	tgagacc	GGTACAGTAAGTGAGAATCCTCTCT	GGTCTTGACAAACGTGTGCTTGTAC
PA14_32500	2824037..2824056	yes	TATGAGGACGAATCTCCCGCTTATA	TAGTTGGTGGGTTTCCCTACCGTGT	GGTCTCG	tata	GCCGCAGGGGCGTCCACGCT	gttt	tgagacc	GGTACAGTAAGTGAGAATCCTCTCT	GGTCTTGACAAACGTGTGCTTGTAC
PA14_32520	2824819..2824838	yes	TATGAGGACGAATCTCCCGCTTATA	TAGTTGGTGGGTTTCCCTACCGTGT	GGTCTCG	tata	ACCAGGTCGAGCATGGACAG	gttt	tgagacc	GGTACAGTAAGTGAGAATCCTCTCT	GGTCTTGACAAACGTGTGCTTGTAC
PA14_32530	2825917..2825936	yes	TATGAGGACGAATCTCCCGCTTATA	TAGTTGGTGGGTTTCCCTACCGTGT	GGTCTCG	tata	AACAGCAGTCGGTGTGCAAC	gttt	tgagacc	GGTACAGTAAGTGAGAATCCTCTCT	GGTCTTGACAAACGTGTGCTTGTAC
PA14_32540	2826573..2826592	yes	TATGAGGACGAATCTCCCGCTTATA	TAGTTGGTGGGTTTCCCTACCGTGT	GGTCTCG	tata	ACGACCAGGGAAAGGATCGA	gttt	tgagacc	GGTACAGTAAGTGAGAATCCTCTCT	GGTCTTGACAAACGTGTGCTTGTAC
PA14_32570	2828927..2828946	yes	TATGAGGACGAATCTCCCGCTTATA	TAGTTGGTGGGTTTCCCTACCGTGT	GGTCTCG	tata	TCAGGGTCAGGCGCAGGCGC	gttt	tgagacc	GGTACAGTAAGTGAGAATCCTCTCT	GGTCTTGACAAACGTGTGCTTGTAC
PA14_32580	2829593..2829612	yes	TATGAGGACGAATCTCCCGCTTATA	TAGTTGGTGGGTTTCCCTACCGTGT	GGTCTCG	tata	GGCGATCAGGTCGTCGTCTT	gttt	tgagacc	GGTACAGTAAGTGAGAATCCTCTCT	GGTCTTGACAAACGTGTGCTTGTAC
PA14_32590	2829811..2829830	yes	TATGAGGACGAATCTCCCGCTTATA	TAGTTGGTGGGTTTCCCTACCGTGT	GGTCTCG	tata	GCAGCAGGAACATCAGGAGC	gttt	tgagacc	GGTACAGTAAGTGAGAATCCTCTCT	GGTCTTGACAAACGTGTGCTTGTAC
PA14_32600	2831636..2831655	yes	TATGAGGACGAATCTCCCGCTTATA	TAGTTGGTGGGTTTCCCTACCGTGT	GGTCTCG	tata	CAGCCAACCACCGAGCAGCG	gttt	tgagacc	GGTACAGTAAGTGAGAATCCTCTCT	GGTCTTGACAAACGTGTGCTTGTAC
PA14_32610	2832408..2832427	yes	TATGAGGACGAATCTCCCGCTTATA	TAGTTGGTGGGTTTCCCTACCGTGT	GGTCTCG	tata	CCAAGGGTGATCAGGTTGCG	gttt	tgagacc	GGTACAGTAAGTGAGAATCCTCTCT	GGTCTTGACAAACGTGTGCTTGTAC
PA14_32630	2833278..2833297	yes	TATGAGGACGAATCTCCCGCTTATA	TAGTTGGTGGGTTTCCCTACCGTGT	GGTCTCG	tata	GGACGCTGAGCGTCATGGCG	gttt	tgagacc	GGTACAGTAAGTGAGAATCCTCTCT	GGTCTTGACAAACGTGTGCTTGTAC
PA14_32640	2835440..2835459	yes	TATGAGGACGAATCTCCCGCTTATA	TAGTTGGTGGGTTTCCCTACCGTGT	GGTCTCG	tata	CAGGCTGGCCCGGATGCGGG	gttt	tgagacc	GGTACAGTAAGTGAGAATCCTCTCT	GGTCTTGACAAACGTGTGCTTGTAC
PA14_32650	2836102..2836121	yes	TATGAGGACGAATCTCCCGCTTATA	TAGTTGGTGGGTTTCCCTACCGTGT	GGTCTCG	tata	GATACGCACCCGATAGGACG	gttt	tgagacc	GGTACAGTAAGTGAGAATCCTCTCT	GGTCTTGACAAACGTGTGCTTGTAC
PA14_32660	2837480..2837499	yes	TATGAGGACGAATCTCCCGCTTATA	TAGTTGGTGGGTTTCCCTACCGTGT	GGTCTCG	tata	TCGATCTTGTTGTTCTTGTC	gttt	tgagacc	GGTACAGTAAGTGAGAATCCTCTCT	GGTCTTGACAAACGTGTGCTTGTAC
PA14_32670	2838260..2838279	yes	TATGAGGACGAATCTCCCGCTTATA	TAGTTGGTGGGTTTCCCTACCGTGT	GGTCTCG	tata	GCGCTTCGGGCGCGAAGAGA	gttt	tgagacc	GGTACAGTAAGTGAGAATCCTCTCT	GGTCTTGACAAACGTGTGCTTGTAC
PA14_32690	2839323..2839342	yes	TATGAGGACGAATCTCCCGCTTATA	TAGTTGGTGGGTTTCCCTACCGTGT	GGTCTCG	tata	GAAGTCGGCGCGCTTCTCGG	gttt	tgagacc	GGTACAGTAAGTGAGAATCCTCTCT	GGTCTTGACAAACGTGTGCTTGTAC
PA14_32700	2839550..2839569	yes	TATGAGGACGAATCTCCCGCTTATA	TAGTTGGTGGGTTTCCCTACCGTGT	GGTCTCG	tata	GGCGGTGCCGCTGAGGTTGC	gttt	tgagacc	GGTACAGTAAGTGAGAATCCTCTCT	GGTCTTGACAAACGTGTGCTTGTAC
PA14_32710	2840496..2840515	yes	TATGAGGACGAATCTCCCGCTTATA	TAGTTGGTGGGTTTCCCTACCGTGT	GGTCTCG	tata	GGCGCTGAGAAGGATCGGGG	gttt	tgagacc	GGTACAGTAAGTGAGAATCCTCTCT	GGTCTTGACAAACGTGTGCTTGTAC
PA14_32720	2841065..2841084	yes	TATGAGGACGAATCTCCCGCTTATA	TAGTTGGTGGGTTTCCCTACCGTGT	GGTCTCG	tata	CAGGCGGACCAGCCAGTGGA	gttt	tgagacc	GGTACAGTAAGTGAGAATCCTCTCT	GGTCTTGACAAACGTGTGCTTGTAC
PA14_32740	2842156..2842175	yes	TATGAGGACGAATCTCCCGCTTATA	TAGTTGGTGGGTTTCCCTACCGTGT	GGTCTCG	tata	ATTGCGGAGGACGACGGCGG	gttt	tgagacc	GGTACAGTAAGTGAGAATCCTCTCT	GGTCTTGACAAACGTGTGCTTGTAC
PA14_32750	2844734..2844753	yes	TATGAGGACGAATCTCCCGCTTATA	TAGTTGGTGGGTTTCCCTACCGTGT	GGTCTCG	tata	GGTGCAGCAGAACCAGGACG	gttt	tgagacc	GGTACAGTAAGTGAGAATCCTCTCT	GGTCTTGACAAACGTGTGCTTGTAC
PA14_32770	2845940..2845959	yes	TATGAGGACGAATCTCCCGCTTATA	TAGTTGGTGGGTTTCCCTACCGTGT	GGTCTCG	tata	GGGCAGGAGCAGTCCCAATG	gttt	tgagacc	GGTACAGTAAGTGAGAATCCTCTCT	GGTCTTGACAAACGTGTGCTTGTAC
PA14_32780	2846809..2846828	yes	TATGAGGACGAATCTCCCGCTTATA	TAGTTGGTGGGTTTCCCTACCGTGT	GGTCTCG	tata	GGGGCGGCGCTGGCAAGAAG	gttt	tgagacc	GGTACAGTAAGTGAGAATCCTCTCT	GGTCTTGACAAACGTGTGCTTGTAC
PA14_32790	2848906..2848925	yes	TATGAGGACGAATCTCCCGCTTATA	TAGTTGGTGGGTTTCCCTACCGTGT	GGTCTCG	tata	TGCGGTTGCCGCCAGTGACC	gttt	tgagacc	GGTACAGTAAGTGAGAATCCTCTCT	GGTCTTGACAAACGTGTGCTTGTAC
PA14_32810	2865442..2865461	yes	TATGAGGACGAATCTCCCGCTTATA	TAGTTGGTGGGTTTCCCTACCGTGT	GGTCTCG	tata	GTATCAACCCCACCGAGTTC	gttt	tgagacc	GGTACAGTAAGTGAGAATCCTCTCT	GGTCTTGACAAACGTGTGCTTGTAC
PA14_32820	2868424..2868443	yes	TATGAGGACGAATCTCCCGCTTATA	TAGTTGGTGGGTTTCCCTACCGTGT	GGTCTCG	tata	GGCTGCTGTTGGCAACTTGG	gttt	tgagacc	GGTACAGTAAGTGAGAATCCTCTCT	GGTCTTGACAAACGTGTGCTTGTAC
PA14_32830	2872834..2872853	yes	TATGAGGACGAATCTCCCGCTTATA	TAGTTGGTGGGTTTCCCTACCGTGT	GGTCTCG	tata	CAGCCAACTACCGTCGCCAC	gttt	tgagacc	GGTACAGTAAGTGAGAATCCTCTCT	GGTCTTGACAAACGTGTGCTTGTAC
PA14_32840	2874191..2874210	yes	TATGAGGACGAATCTCCCGCTTATA	TAGTTGGTGGGTTTCCCTACCGTGT	GGTCTCG	tata	TGACGACGCTATCGGAAGTG	gttt	tgagacc	GGTACAGTAAGTGAGAATCCTCTCT	GGTCTTGACAAACGTGTGCTTGTAC
PA14_32850	2875976..2875995	yes	TATGAGGACGAATCTCCCGCTTATA	TAGTTGGTGGGTTTCCCTACCGTGT	GGTCTCG	tata	TGTTGTAGTGACGAGTGAAG	gttt	tgagacc	GGTACAGTAAGTGAGAATCCTCTCT	GGTCTTGACAAACGTGTGCTTGTAC
PA14_32860	2877043..2877062	yes	TATGAGGACGAATCTCCCGCTTATA	TAGTTGGTGGGTTTCCCTACCGTGT	GGTCTCG	tata	GCGGCGCAGCAGGCGTTCTT	gttt	tgagacc	GGTACAGTAAGTGAGAATCCTCTCT	GGTCTTGACAAACGTGTGCTTGTAC
PA14_32880	2877888..2877907	yes	TATGAGGACGAATCTCCCGCTTATA	TAGTTGGTGGGTTTCCCTACCGTGT	GGTCTCG	tata	CCGGTTGGCCTCGTGCAGGT	gttt	tgagacc	GGTACAGTAAGTGAGAATCCTCTCT	GGTCTTGACAAACGTGTGCTTGTAC
PA14_32890	2878166..2878185	yes	TATGAGGACGAATCTCCCGCTTATA	TAGTTGGTGGGTTTCCCTACCGTGT	GGTCTCG	tata	CAGGGCGGGCAGCAGACGGG	gttt	tgagacc	GGTACAGTAAGTGAGAATCCTCTCT	GGTCTTGACAAACGTGTGCTTGTAC
PA14_32905	2878359..2878378	yes	TATGAGGACGAATCTCCCGCTTATA	TAGTTGGTGGGTTTCCCTACCGTGT	GGTCTCG	tata	AAGCAACAACGAGGTGGAAA	gttt	tgagacc	GGTACAGTAAGTGAGAATCCTCTCT	GGTCTTGACAAACGTGTGCTTGTAC
PA14_32930	2880140..2880159	yes	TATGAGGACGAATCTCCCGCTTATA	TAGTTGGTGGGTTTCCCTACCGTGT	GGTCTCG	tata	AGAATACCGGGCGCAAGAGT	gttt	tgagacc	GGTACAGTAAGTGAGAATCCTCTCT	GGTCTTGACAAACGTGTGCTTGTAC
PA14_32940	2881142..2881161	yes	TATGAGGACGAATCTCCCGCTTATA	TAGTTGGTGGGTTTCCCTACCGTGT	GGTCTCG	tata	CACGGTCGATGAAGGAGACG	gttt	tgagacc	GGTACAGTAAGTGAGAATCCTCTCT	GGTCTTGACAAACGTGTGCTTGTAC
PA14_32950	2884379..2884398	no	TATGAGGACGAATCTCCCGCTTATA	TAGTTGGTGGGTTTCCCTACCGTGT	GGTCTCG	tata	CAGGCGCCGGCGAGGAGGGT	gttt	tgagacc	GGTACAGTAAGTGAGAATCCTCTCT	GGTCTTGACAAACGTGTGCTTGTAC
PA14_32970	2884558..2884577	yes	TATGAGGACGAATCTCCCGCTTATA	TAGTTGGTGGGTTTCCCTACCGTGT	GGTCTCG	tata	AGTGGCGACGAACATCGCCA	gttt	tgagacc	GGTACAGTAAGTGAGAATCCTCTCT	GGTCTTGACAAACGTGTGCTTGTAC
PA14_32985	2885743..2885762	yes	TATGAGGACGAATCTCCCGCTTATA	TAGTTGGTGGGTTTCCCTACCGTGT	GGTCTCG	tata	GCGCAGCCATTCGTGGTCGG	gttt	tgagacc	GGTACAGTAAGTGAGAATCCTCTCT	GGTCTTGACAAACGTGTGCTTGTAC
PA14_33000	2886122..2886141	yes	TATGAGGACGAATCTCCCGCTTATA	TAGTTGGTGGGTTTCCCTACCGTGT	GGTCTCG	tata	GGTGCCGAGGTTCAGGTTAT	gttt	tgagacc	GGTACAGTAAGTGAGAATCCTCTCT	GGTCTTGACAAACGTGTGCTTGTAC
PA14_33010	2889157..2889176	yes	TATGAGGACGAATCTCCCGCTTATA	TAGTTGGTGGGTTTCCCTACCGTGT	GGTCTCG	tata	CGTCGTCGTAGCCCTGGAGC	gttt	tgagacc	GGTACAGTAAGTGAGAATCCTCTCT	GGTCTTGACAAACGTGTGCTTGTAC
PA14_33030	2890448..2890467	yes	TATGAGGACGAATCTCCCGCTTATA	TAGTTGGTGGGTTTCCCTACCGTGT	GGTCTCG	tata	GAACAGATCGAAGACACTCA	gttt	tgagacc	GGTACAGTAAGTGAGAATCCTCTCT	GGTCTTGACAAACGTGTGCTTGTAC
PA14_33040	2891918..2891937	yes	TATGAGGACGAATCTCCCGCTTATA	TAGTTGGTGGGTTTCCCTACCGTGT	GGTCTCG	tata	CGTCTTGGCGAGGGTTTCTG	gttt	tgagacc	GGTACAGTAAGTGAGAATCCTCTCT	GGTCTTGACAAACGTGTGCTTGTAC
PA14_33050	2893922..2893941	yes	TATGAGGACGAATCTCCCGCTTATA	TAGTTGGTGGGTTTCCCTACCGTGT	GGTCTCG	tata	CCTCCTTGGGAATGGGCTAG	gttt	tgagacc	GGTACAGTAAGTGAGAATCCTCTCT	GGTCTTGACAAACGTGTGCTTGTAC
PA14_33060	2894892..2894911	yes	TATGAGGACGAATCTCCCGCTTATA	TAGTTGGTGGGTTTCCCTACCGTGT	GGTCTCG	tata	TCAGGAACGTCATCCCGATC	gttt	tgagacc	GGTACAGTAAGTGAGAATCCTCTCT	GGTCTTGACAAACGTGTGCTTGTAC
PA14_33070	2895633..2895652	yes	TATGAGGACGAATCTCCCGCTTATA	TAGTTGGTGGGTTTCCCTACCGTGT	GGTCTCG	tata	CGATTCGGCGGCGACGCCCT	gttt	tgagacc	GGTACAGTAAGTGAGAATCCTCTCT	GGTCTTGACAAACGTGTGCTTGTAC
PA14_33080	2897631..2897650	yes	TATGAGGACGAATCTCCCGCTTATA	TAGTTGGTGGGTTTCCCTACCGTGT	GGTCTCG	tata	TGTGCGAGTGGGAGTGACCG	gttt	tgagacc	GGTACAGTAAGTGAGAATCCTCTCT	GGTCTTGACAAACGTGTGCTTGTAC
PA14_33110	2898668..2898687	yes	TATGAGGACGAATCTCCCGCTTATA	TAGTTGGTGGGTTTCCCTACCGTGT	GGTCTCG	tata	GGCGTCCGGCCTGCAGCCAG	gttt	tgagacc	GGTACAGTAAGTGAGAATCCTCTCT	GGTCTTGACAAACGTGTGCTTGTAC
PA14_33120	2899848..2899867	yes	TATGAGGACGAATCTCCCGCTTATA	TAGTTGGTGGGTTTCCCTACCGTGT	GGTCTCG	tata	CGCGCACCGTTGCCCGTGAA	gttt	tgagacc	GGTACAGTAAGTGAGAATCCTCTCT	GGTCTTGACAAACGTGTGCTTGTAC
PA14_33130	2900302..2900321	yes	TATGAGGACGAATCTCCCGCTTATA	TAGTTGGTGGGTTTCCCTACCGTGT	GGTCTCG	tata	CCATGGCTGCCGTGGGCGGT	gttt	tgagacc	GGTACAGTAAGTGAGAATCCTCTCT	GGTCTTGACAAACGTGTGCTTGTAC
PA14_33150	2902318..2902337	yes	TATGAGGACGAATCTCCCGCTTATA	TAGTTGGTGGGTTTCCCTACCGTGT	GGTCTCG	tata	GGACAGCGTGCCGACCGCCA	gttt	tgagacc	GGTACAGTAAGTGAGAATCCTCTCT	GGTCTTGACAAACGTGTGCTTGTAC
PA14_33160	2903186..2903205	yes	TATGAGGACGAATCTCCCGCTTATA	TAGTTGGTGGGTTTCCCTACCGTGT	GGTCTCG	tata	CAGGGCGGCGGCGATGAGCA	gttt	tgagacc	GGTACAGTAAGTGAGAATCCTCTCT	GGTCTTGACAAACGTGTGCTTGTAC
PA14_33170	2904200..2904219	yes	TATGAGGACGAATCTCCCGCTTATA	TAGTTGGTGGGTTTCCCTACCGTGT	GGTCTCG	tata	GAGTTCGGCGACGTTGAGGA	gttt	tgagacc	GGTACAGTAAGTGAGAATCCTCTCT	GGTCTTGACAAACGTGTGCTTGTAC
PA14_33190	2904676..2904695	yes	TATGAGGACGAATCTCCCGCTTATA	TAGTTGGTGGGTTTCCCTACCGTGT	GGTCTCG	tata	CGGCTGCCGCCAGAGCAAGC	gttt	tgagacc	GGTACAGTAAGTGAGAATCCTCTCT	GGTCTTGACAAACGTGTGCTTGTAC
PA14_33190,PA14_33200	2906821..2906840	yes	TATGAGGACGAATCTCCCGCTTATA	TAGTTGGTGGGTTTCCCTACCGTGT	GGTCTCG	tata	CCCCCGATCTCGACATCAGC	gttt	tgagacc	GGTACAGTAAGTGAGAATCCTCTCT	GGTCTTGACAAACGTGTGCTTGTAC
PA14_33220	2907029..2907048	yes	TATGAGGACGAATCTCCCGCTTATA	TAGTTGGTGGGTTTCCCTACCGTGT	GGTCTCG	tata	GCGGCCATTTGCCTTGCAAC	gttt	tgagacc	GGTACAGTAAGTGAGAATCCTCTCT	GGTCTTGACAAACGTGTGCTTGTAC
PA14_33230	2908272..2908291	yes	TATGAGGACGAATCTCCCGCTTATA	TAGTTGGTGGGTTTCCCTACCGTGT	GGTCTCG	tata	CGCATCGATGAGTTGCTGTT	gttt	tgagacc	GGTACAGTAAGTGAGAATCCTCTCT	GGTCTTGACAAACGTGTGCTTGTAC
PA14_33240	2908579..2908598	yes	TATGAGGACGAATCTCCCGCTTATA	TAGTTGGTGGGTTTCCCTACCGTGT	GGTCTCG	tata	GCGGCCCGAGGTATCGCCAT	gttt	tgagacc	GGTACAGTAAGTGAGAATCCTCTCT	GGTCTTGACAAACGTGTGCTTGTAC
PA14_33250	2909579..2909598	yes	TATGAGGACGAATCTCCCGCTTATA	TAGTTGGTGGGTTTCCCTACCGTGT	GGTCTCG	tata	GACAGGCTGGAGGCTGGGGA	gttt	tgagacc	GGTACAGTAAGTGAGAATCCTCTCT	GGTCTTGACAAACGTGTGCTTGTAC
[truncated: 3,983 more rows]

## Sheet: PA14 CRISPRi library set 2
PA14 CRISPRi library set 2
all_targets	all_ranges	5863-targeted	General barcode-left	Strain specific barcode left	BsaI or BsmBI + 1 nt	overhang-left	sgRNA_seq	overhang-right	1 nt + BsaI or BsmBI	Strain specific barcode right	General barcode-right
PA14_00010	524..543	yes	TATGAGGACGAATCTCCCGCTTATA	GGTTCTAAGTTTAGCGTAGCCGGTT	GGTCTCG	tata	GTTGGGACGGCAGCTCATCG	gttt	tgagacc	CTTTAGGTGGGTGCGATTGCCAGTT	GGTCTTGACAAACGTGTGCTTGTAC
PA14_00020	2084..2103	yes	TATGAGGACGAATCTCCCGCTTATA	GGTTCTAAGTTTAGCGTAGCCGGTT	GGTCTCG	tata	CAGTTGCAGCGGTTTCAACA	gttt	tgagacc	CTTTAGGTGGGTGCGATTGCCAGTT	GGTCTTGACAAACGTGTGCTTGTAC
PA14_00030	3177..3196	yes	TATGAGGACGAATCTCCCGCTTATA	GGTTCTAAGTTTAGCGTAGCCGGTT	GGTCTCG	tata	CGGTGACCGAAACGCGGGTC	gttt	tgagacc	CTTTAGGTGGGTGCGATTGCCAGTT	GGTCTTGACAAACGTGTGCTTGTAC
PA14_00050	4336..4355	yes	TATGAGGACGAATCTCCCGCTTATA	GGTTCTAAGTTTAGCGTAGCCGGTT	GGTCTCG	tata	CATGCCGGGGCGCTTGCGTA	gttt	tgagacc	CTTTAGGTGGGTGCGATTGCCAGTT	GGTCTTGACAAACGTGTGCTTGTAC
PA14_00060	7744..7763	yes	TATGAGGACGAATCTCCCGCTTATA	GGTTCTAAGTTTAGCGTAGCCGGTT	GGTCTCG	tata	CAGCAGCAGGTAAAAGAGGA	gttt	tgagacc	CTTTAGGTGGGTGCGATTGCCAGTT	GGTCTTGACAAACGTGTGCTTGTAC
PA14_00070	8312..8331	yes	TATGAGGACGAATCTCCCGCTTATA	GGTTCTAAGTTTAGCGTAGCCGGTT	GGTCTCG	tata	GGTCGAGAATCAGCAGGGAA	gttt	tgagacc	CTTTAGGTGGGTGCGATTGCCAGTT	GGTCTTGACAAACGTGTGCTTGTAC
PA14_00080	8700..8719	yes	TATGAGGACGAATCTCCCGCTTATA	GGTTCTAAGTTTAGCGTAGCCGGTT	GGTCTCG	tata	AAACGAGGGACAAGCTTGAA	gttt	tgagacc	CTTTAGGTGGGTGCGATTGCCAGTT	GGTCTTGACAAACGTGTGCTTGTAC
PA14_00090	12449..12468	yes	TATGAGGACGAATCTCCCGCTTATA	GGTTCTAAGTTTAGCGTAGCCGGTT	GGTCTCG	tata	CTTCGGTGCCCAGTTCGACC	gttt	tgagacc	CTTTAGGTGGGTGCGATTGCCAGTT	GGTCTTGACAAACGTGTGCTTGTAC
PA14_00100	13398..13417	yes	TATGAGGACGAATCTCCCGCTTATA	GGTTCTAAGTTTAGCGTAGCCGGTT	GGTCTCG	tata	TCTTGGAAGGTGCGCACGGC	gttt	tgagacc	CTTTAGGTGGGTGCGATTGCCAGTT	GGTCTTGACAAACGTGTGCTTGTAC
PA14_00110	13573..13592	yes	TATGAGGACGAATCTCCCGCTTATA	GGTTCTAAGTTTAGCGTAGCCGGTT	GGTCTCG	tata	TCGTGGTAGGCCATGTAGAG	gttt	tgagacc	CTTTAGGTGGGTGCGATTGCCAGTT	GGTCTTGACAAACGTGTGCTTGTAC
PA14_00120	14259..14278	yes	TATGAGGACGAATCTCCCGCTTATA	GGTTCTAAGTTTAGCGTAGCCGGTT	GGTCTCG	tata	GGCGTAGGGCCCCCACCACC	gttt	tgagacc	CTTTAGGTGGGTGCGATTGCCAGTT	GGTCTTGACAAACGTGTGCTTGTAC
PA14_00130	15232..15251	yes	TATGAGGACGAATCTCCCGCTTATA	GGTTCTAAGTTTAGCGTAGCCGGTT	GGTCTCG	tata	CGGCACTTGAGCGGGGTTCG	gttt	tgagacc	CTTTAGGTGGGTGCGATTGCCAGTT	GGTCTTGACAAACGTGTGCTTGTAC
PA14_00140	15658..15677	yes	TATGAGGACGAATCTCCCGCTTATA	GGTTCTAAGTTTAGCGTAGCCGGTT	GGTCTCG	tata	GAAGGCGATCAGGCCGGCCA	gttt	tgagacc	CTTTAGGTGGGTGCGATTGCCAGTT	GGTCTTGACAAACGTGTGCTTGTAC
PA14_00150	16562..16581	yes	TATGAGGACGAATCTCCCGCTTATA	GGTTCTAAGTTTAGCGTAGCCGGTT	GGTCTCG	tata	TATGGGTATTCGACATAGGA	gttt	tgagacc	CTTTAGGTGGGTGCGATTGCCAGTT	GGTCTTGACAAACGTGTGCTTGTAC
PA14_00160	17153..17172	yes	TATGAGGACGAATCTCCCGCTTATA	GGTTCTAAGTTTAGCGTAGCCGGTT	GGTCTCG	tata	CGTCCAGGTAGCCCTTGCCC	gttt	tgagacc	CTTTAGGTGGGTGCGATTGCCAGTT	GGTCTTGACAAACGTGTGCTTGTAC
PA14_00170	18694..18713	yes	TATGAGGACGAATCTCCCGCTTATA	GGTTCTAAGTTTAGCGTAGCCGGTT	GGTCTCG	tata	GGCTTCGCTGGCCAGGTGCT	gttt	tgagacc	CTTTAGGTGGGTGCGATTGCCAGTT	GGTCTTGACAAACGTGTGCTTGTAC
PA14_00180	20065..20084	yes	TATGAGGACGAATCTCCCGCTTATA	GGTTCTAAGTTTAGCGTAGCCGGTT	GGTCTCG	tata	GCCTGGCAGGCGGCGAGACG	gttt	tgagacc	CTTTAGGTGGGTGCGATTGCCAGTT	GGTCTTGACAAACGTGTGCTTGTAC
PA14_00190	20984..21003	yes	TATGAGGACGAATCTCCCGCTTATA	GGTTCTAAGTTTAGCGTAGCCGGTT	GGTCTCG	tata	GGCGGCGAATTCCGGGGTTC	gttt	tgagacc	CTTTAGGTGGGTGCGATTGCCAGTT	GGTCTTGACAAACGTGTGCTTGTAC
PA14_00200	21564..21583	yes	TATGAGGACGAATCTCCCGCTTATA	GGTTCTAAGTTTAGCGTAGCCGGTT	GGTCTCG	tata	CGGGGAATTCGAGAATGTTC	gttt	tgagacc	CTTTAGGTGGGTGCGATTGCCAGTT	GGTCTTGACAAACGTGTGCTTGTAC
PA14_00210	21756..21775	yes	TATGAGGACGAATCTCCCGCTTATA	GGTTCTAAGTTTAGCGTAGCCGGTT	GGTCTCG	tata	CGCTCGCGGCAAGGAGCAGA	gttt	tgagacc	CTTTAGGTGGGTGCGATTGCCAGTT	GGTCTTGACAAACGTGTGCTTGTAC
PA14_00230	22937..22956	yes	TATGAGGACGAATCTCCCGCTTATA	GGTTCTAAGTTTAGCGTAGCCGGTT	GGTCTCG	tata	CCAGTTCGGGCAGGCCATGC	gttt	tgagacc	CTTTAGGTGGGTGCGATTGCCAGTT	GGTCTTGACAAACGTGTGCTTGTAC
PA14_00240	24056..24075	yes	TATGAGGACGAATCTCCCGCTTATA	GGTTCTAAGTTTAGCGTAGCCGGTT	GGTCTCG	tata	GCCGCCCTCGCGGACGACCC	gttt	tgagacc	CTTTAGGTGGGTGCGATTGCCAGTT	GGTCTTGACAAACGTGTGCTTGTAC
PA14_00250	25530..25549	yes	TATGAGGACGAATCTCCCGCTTATA	GGTTCTAAGTTTAGCGTAGCCGGTT	GGTCTCG	tata	GGCCGCCGTAGGCAGCGAAC	gttt	tgagacc	CTTTAGGTGGGTGCGATTGCCAGTT	GGTCTTGACAAACGTGTGCTTGTAC
PA14_00280	25768..25787	yes	TATGAGGACGAATCTCCCGCTTATA	GGTTCTAAGTTTAGCGTAGCCGGTT	GGTCTCG	tata	AGGTTTTGACAGCGGCGATA	gttt	tgagacc	CTTTAGGTGGGTGCGATTGCCAGTT	GGTCTTGACAAACGTGTGCTTGTAC
PA14_00290	26761..26780	yes	TATGAGGACGAATCTCCCGCTTATA	GGTTCTAAGTTTAGCGTAGCCGGTT	GGTCTCG	tata	GCGACTTGCTGTGGCCGATG	gttt	tgagacc	CTTTAGGTGGGTGCGATTGCCAGTT	GGTCTTGACAAACGTGTGCTTGTAC
PA14_00300	27723..27742	yes	TATGAGGACGAATCTCCCGCTTATA	GGTTCTAAGTTTAGCGTAGCCGGTT	GGTCTCG	tata	GTTGCGACCAGGCGTTGGCC	gttt	tgagacc	CTTTAGGTGGGTGCGATTGCCAGTT	GGTCTTGACAAACGTGTGCTTGTAC
PA14_00310	28695..28714	yes	TATGAGGACGAATCTCCCGCTTATA	GGTTCTAAGTTTAGCGTAGCCGGTT	GGTCTCG	tata	GCTCCACGCCAGCAGCCCGA	gttt	tgagacc	CTTTAGGTGGGTGCGATTGCCAGTT	GGTCTTGACAAACGTGTGCTTGTAC
PA14_00320	29943..29962	yes	TATGAGGACGAATCTCCCGCTTATA	GGTTCTAAGTTTAGCGTAGCCGGTT	GGTCTCG	tata	TCGCCAGCCCGCTGCAGCCG	gttt	tgagacc	CTTTAGGTGGGTGCGATTGCCAGTT	GGTCTTGACAAACGTGTGCTTGTAC
PA14_00340	32031..32050	yes	TATGAGGACGAATCTCCCGCTTATA	GGTTCTAAGTTTAGCGTAGCCGGTT	GGTCTCG	tata	GTAGCCCCGGTAGCCAGGCG	gttt	tgagacc	CTTTAGGTGGGTGCGATTGCCAGTT	GGTCTTGACAAACGTGTGCTTGTAC
PA14_00360	32970..32989	yes	TATGAGGACGAATCTCCCGCTTATA	GGTTCTAAGTTTAGCGTAGCCGGTT	GGTCTCG	tata	GTGGCGGCCAGCAGGCAGGT	gttt	tgagacc	CTTTAGGTGGGTGCGATTGCCAGTT	GGTCTTGACAAACGTGTGCTTGTAC
PA14_00380	34498..34517	yes	TATGAGGACGAATCTCCCGCTTATA	GGTTCTAAGTTTAGCGTAGCCGGTT	GGTCTCG	tata	GCCATGATGAACAGGATGTT	gttt	tgagacc	CTTTAGGTGGGTGCGATTGCCAGTT	GGTCTTGACAAACGTGTGCTTGTAC
PA14_00400	34666..34685	yes	TATGAGGACGAATCTCCCGCTTATA	GGTTCTAAGTTTAGCGTAGCCGGTT	GGTCTCG	tata	CGGAGCAGGTCGAGGGATGG	gttt	tgagacc	CTTTAGGTGGGTGCGATTGCCAGTT	GGTCTTGACAAACGTGTGCTTGTAC
PA14_00410	35589..35608	yes	TATGAGGACGAATCTCCCGCTTATA	GGTTCTAAGTTTAGCGTAGCCGGTT	GGTCTCG	tata	ATGGAAGCCCTGGATGCGGG	gttt	tgagacc	CTTTAGGTGGGTGCGATTGCCAGTT	GGTCTTGACAAACGTGTGCTTGTAC
PA14_00420	36247..36266	yes	TATGAGGACGAATCTCCCGCTTATA	GGTTCTAAGTTTAGCGTAGCCGGTT	GGTCTCG	tata	GTTGGCGCGGTCGCCCAGGG	gttt	tgagacc	CTTTAGGTGGGTGCGATTGCCAGTT	GGTCTTGACAAACGTGTGCTTGTAC
PA14_00430	36869..36888	yes	TATGAGGACGAATCTCCCGCTTATA	GGTTCTAAGTTTAGCGTAGCCGGTT	GGTCTCG	tata	GCGCACGGCCAGGCGGATAG	gttt	tgagacc	CTTTAGGTGGGTGCGATTGCCAGTT	GGTCTTGACAAACGTGTGCTTGTAC
PA14_00440	37876..37895	yes	TATGAGGACGAATCTCCCGCTTATA	GGTTCTAAGTTTAGCGTAGCCGGTT	GGTCTCG	tata	CTGCTTGAGCTGGGCGAAGC	gttt	tgagacc	CTTTAGGTGGGTGCGATTGCCAGTT	GGTCTTGACAAACGTGTGCTTGTAC
PA14_00450	39077..39096	yes	TATGAGGACGAATCTCCCGCTTATA	GGTTCTAAGTTTAGCGTAGCCGGTT	GGTCTCG	tata	CGAACAGGCCCTTGGCGTCG	gttt	tgagacc	CTTTAGGTGGGTGCGATTGCCAGTT	GGTCTTGACAAACGTGTGCTTGTAC
PA14_00460	39237..39256	yes	TATGAGGACGAATCTCCCGCTTATA	GGTTCTAAGTTTAGCGTAGCCGGTT	GGTCTCG	tata	GCAGGGCATTCAGGGAGGGC	gttt	tgagacc	CTTTAGGTGGGTGCGATTGCCAGTT	GGTCTTGACAAACGTGTGCTTGTAC
PA14_00470	40225..40244	yes	TATGAGGACGAATCTCCCGCTTATA	GGTTCTAAGTTTAGCGTAGCCGGTT	GGTCTCG	tata	GTTCGATCTTCTTGTAGGTG	gttt	tgagacc	CTTTAGGTGGGTGCGATTGCCAGTT	GGTCTTGACAAACGTGTGCTTGTAC
PA14_00480	40653..40672	yes	TATGAGGACGAATCTCCCGCTTATA	GGTTCTAAGTTTAGCGTAGCCGGTT	GGTCTCG	tata	GGCGAATGCGCTGCCCGCCA	gttt	tgagacc	CTTTAGGTGGGTGCGATTGCCAGTT	GGTCTTGACAAACGTGTGCTTGTAC
PA14_00490	41150..41169	yes	TATGAGGACGAATCTCCCGCTTATA	GGTTCTAAGTTTAGCGTAGCCGGTT	GGTCTCG	tata	GGCACAGGAAGATAAAGGCC	gttt	tgagacc	CTTTAGGTGGGTGCGATTGCCAGTT	GGTCTTGACAAACGTGTGCTTGTAC
PA14_00510	44394..44413	yes	TATGAGGACGAATCTCCCGCTTATA	GGTTCTAAGTTTAGCGTAGCCGGTT	GGTCTCG	tata	CGCTGACGCGGGTGGACTGC	gttt	tgagacc	CTTTAGGTGGGTGCGATTGCCAGTT	GGTCTTGACAAACGTGTGCTTGTAC
PA14_00520	54617..54636	yes	TATGAGGACGAATCTCCCGCTTATA	GGTTCTAAGTTTAGCGTAGCCGGTT	GGTCTCG	tata	ACGCTGGTAGTCCTCGTCCT	gttt	tgagacc	CTTTAGGTGGGTGCGATTGCCAGTT	GGTCTTGACAAACGTGTGCTTGTAC
PA14_00530	54937..54956	yes	TATGAGGACGAATCTCCCGCTTATA	GGTTCTAAGTTTAGCGTAGCCGGTT	GGTCTCG	tata	GATCGCAAGGGCCGCCAGGG	gttt	tgagacc	CTTTAGGTGGGTGCGATTGCCAGTT	GGTCTTGACAAACGTGTGCTTGTAC
PA14_00550	56951..56970	yes	TATGAGGACGAATCTCCCGCTTATA	GGTTCTAAGTTTAGCGTAGCCGGTT	GGTCTCG	tata	ATCCATCGGGTTCTCCGCCC	gttt	tgagacc	CTTTAGGTGGGTGCGATTGCCAGTT	GGTCTTGACAAACGTGTGCTTGTAC
PA14_00560	57178..57197	yes	TATGAGGACGAATCTCCCGCTTATA	GGTTCTAAGTTTAGCGTAGCCGGTT	GGTCTCG	tata	CTCAACTCAGCCACGAAAGA	gttt	tgagacc	CTTTAGGTGGGTGCGATTGCCAGTT	GGTCTTGACAAACGTGTGCTTGTAC
PA14_00570	59051..59070	yes	TATGAGGACGAATCTCCCGCTTATA	GGTTCTAAGTTTAGCGTAGCCGGTT	GGTCTCG	tata	AGGGTGGCGACGGCGAGGAG	gttt	tgagacc	CTTTAGGTGGGTGCGATTGCCAGTT	GGTCTTGACAAACGTGTGCTTGTAC
PA14_00580	59804..59823	yes	TATGAGGACGAATCTCCCGCTTATA	GGTTCTAAGTTTAGCGTAGCCGGTT	GGTCTCG	tata	TCCCACTGGTACAGCGTCTT	gttt	tgagacc	CTTTAGGTGGGTGCGATTGCCAGTT	GGTCTTGACAAACGTGTGCTTGTAC
PA14_00590	60278..60297	yes	TATGAGGACGAATCTCCCGCTTATA	GGTTCTAAGTTTAGCGTAGCCGGTT	GGTCTCG	tata	GCCGGCCTCGGCCAGCGGGA	gttt	tgagacc	CTTTAGGTGGGTGCGATTGCCAGTT	GGTCTTGACAAACGTGTGCTTGTAC
PA14_00600	61100..61119	yes	TATGAGGACGAATCTCCCGCTTATA	GGTTCTAAGTTTAGCGTAGCCGGTT	GGTCTCG	tata	TCAGGGCGTTCTGCTGGCGT	gttt	tgagacc	CTTTAGGTGGGTGCGATTGCCAGTT	GGTCTTGACAAACGTGTGCTTGTAC
PA14_00620	63058..63077	yes	TATGAGGACGAATCTCCCGCTTATA	GGTTCTAAGTTTAGCGTAGCCGGTT	GGTCTCG	tata	GGGAGTATCGGCTTGCGTGA	gttt	tgagacc	CTTTAGGTGGGTGCGATTGCCAGTT	GGTCTTGACAAACGTGTGCTTGTAC
PA14_00630	63797..63816	yes	TATGAGGACGAATCTCCCGCTTATA	GGTTCTAAGTTTAGCGTAGCCGGTT	GGTCTCG	tata	CCCAGCACCGGGCCCGCGCA	gttt	tgagacc	CTTTAGGTGGGTGCGATTGCCAGTT	GGTCTTGACAAACGTGTGCTTGTAC
PA14_00640	64741..64760	yes	TATGAGGACGAATCTCCCGCTTATA	GGTTCTAAGTTTAGCGTAGCCGGTT	GGTCTCG	tata	CCCGCGCAAGGCGAGCGTAT	gttt	tgagacc	CTTTAGGTGGGTGCGATTGCCAGTT	GGTCTTGACAAACGTGTGCTTGTAC
PA14_00650	66945..66964	yes	TATGAGGACGAATCTCCCGCTTATA	GGTTCTAAGTTTAGCGTAGCCGGTT	GGTCTCG	tata	GGAACACATGCACGTGGCTG	gttt	tgagacc	CTTTAGGTGGGTGCGATTGCCAGTT	GGTCTTGACAAACGTGTGCTTGTAC
PA14_00660	67699..67718	yes	TATGAGGACGAATCTCCCGCTTATA	GGTTCTAAGTTTAGCGTAGCCGGTT	GGTCTCG	tata	GGAACTTGCTGGTGTCGTCG	gttt	tgagacc	CTTTAGGTGGGTGCGATTGCCAGTT	GGTCTTGACAAACGTGTGCTTGTAC
PA14_00670	68253..68272	yes	TATGAGGACGAATCTCCCGCTTATA	GGTTCTAAGTTTAGCGTAGCCGGTT	GGTCTCG	tata	TCGAAGCCTGGTAGATCGAC	gttt	tgagacc	CTTTAGGTGGGTGCGATTGCCAGTT	GGTCTTGACAAACGTGTGCTTGTAC
PA14_00680	69236..69255	yes	TATGAGGACGAATCTCCCGCTTATA	GGTTCTAAGTTTAGCGTAGCCGGTT	GGTCTCG	tata	CGAAGACGCGGGTGGCGGTC	gttt	tgagacc	CTTTAGGTGGGTGCGATTGCCAGTT	GGTCTTGACAAACGTGTGCTTGTAC
PA14_00690	69420..69439	yes	TATGAGGACGAATCTCCCGCTTATA	GGTTCTAAGTTTAGCGTAGCCGGTT	GGTCTCG	tata	GACGCCGGCGGCACCCAGCA	gttt	tgagacc	CTTTAGGTGGGTGCGATTGCCAGTT	GGTCTTGACAAACGTGTGCTTGTAC
PA14_00700	70340..70359	yes	TATGAGGACGAATCTCCCGCTTATA	GGTTCTAAGTTTAGCGTAGCCGGTT	GGTCTCG	tata	CGGATCGTAGAGGTAATGCA	gttt	tgagacc	CTTTAGGTGGGTGCGATTGCCAGTT	GGTCTTGACAAACGTGTGCTTGTAC
PA14_00710	71123..71142	yes	TATGAGGACGAATCTCCCGCTTATA	GGTTCTAAGTTTAGCGTAGCCGGTT	GGTCTCG	tata	TGTCGACTCCTCCGGAGCTG	gttt	tgagacc	CTTTAGGTGGGTGCGATTGCCAGTT	GGTCTTGACAAACGTGTGCTTGTAC
PA14_00720	71706..71725	yes	TATGAGGACGAATCTCCCGCTTATA	GGTTCTAAGTTTAGCGTAGCCGGTT	GGTCTCG	tata	CGTGGCGCTGAACAGCAAGG	gttt	tgagacc	CTTTAGGTGGGTGCGATTGCCAGTT	GGTCTTGACAAACGTGTGCTTGTAC
PA14_00730	72325..72344	yes	TATGAGGACGAATCTCCCGCTTATA	GGTTCTAAGTTTAGCGTAGCCGGTT	GGTCTCG	tata	CAGCGCGAGCGGGACGAGAC	gttt	tgagacc	CTTTAGGTGGGTGCGATTGCCAGTT	GGTCTTGACAAACGTGTGCTTGTAC
PA14_00740	72785..72804	yes	TATGAGGACGAATCTCCCGCTTATA	GGTTCTAAGTTTAGCGTAGCCGGTT	GGTCTCG	tata	AGCAGCCGCTCAGGACGAGC	gttt	tgagacc	CTTTAGGTGGGTGCGATTGCCAGTT	GGTCTTGACAAACGTGTGCTTGTAC
PA14_00750	72970..72989	yes	TATGAGGACGAATCTCCCGCTTATA	GGTTCTAAGTTTAGCGTAGCCGGTT	GGTCTCG	tata	CGAAGGCGGCGTGGCATGGG	gttt	tgagacc	CTTTAGGTGGGTGCGATTGCCAGTT	GGTCTTGACAAACGTGTGCTTGTAC
PA14_00760	75009..75028	no	TATGAGGACGAATCTCCCGCTTATA	GGTTCTAAGTTTAGCGTAGCCGGTT	GGTCTCG	tata	GGGGCGGTGGGGGTGGCGAA	gttt	tgagacc	CTTTAGGTGGGTGCGATTGCCAGTT	GGTCTTGACAAACGTGTGCTTGTAC
PA14_00770	75696..75715	yes	TATGAGGACGAATCTCCCGCTTATA	GGTTCTAAGTTTAGCGTAGCCGGTT	GGTCTCG	tata	CGAGATCGAAGAGGATGTTC	gttt	tgagacc	CTTTAGGTGGGTGCGATTGCCAGTT	GGTCTTGACAAACGTGTGCTTGTAC
PA14_00780	76241..76260	yes	TATGAGGACGAATCTCCCGCTTATA	GGTTCTAAGTTTAGCGTAGCCGGTT	GGTCTCG	tata	CAGTGGCGTTTTGCCCTGGT	gttt	tgagacc	CTTTAGGTGGGTGCGATTGCCAGTT	GGTCTTGACAAACGTGTGCTTGTAC
PA14_00790	76370..76389	yes	TATGAGGACGAATCTCCCGCTTATA	GGTTCTAAGTTTAGCGTAGCCGGTT	GGTCTCG	tata	CAGGTCGTAGGCCTGCAGAA	gttt	tgagacc	CTTTAGGTGGGTGCGATTGCCAGTT	GGTCTTGACAAACGTGTGCTTGTAC
PA14_00800	78415..78434	yes	TATGAGGACGAATCTCCCGCTTATA	GGTTCTAAGTTTAGCGTAGCCGGTT	GGTCTCG	tata	CCCGGCGATGAAGCGCTTCC	gttt	tgagacc	CTTTAGGTGGGTGCGATTGCCAGTT	GGTCTTGACAAACGTGTGCTTGTAC
PA14_00810	78773..78792	yes	TATGAGGACGAATCTCCCGCTTATA	GGTTCTAAGTTTAGCGTAGCCGGTT	GGTCTCG	tata	ACCGCGACCGCGCGGGGGCA	gttt	tgagacc	CTTTAGGTGGGTGCGATTGCCAGTT	GGTCTTGACAAACGTGTGCTTGTAC
PA14_00820	80932..80951	yes	TATGAGGACGAATCTCCCGCTTATA	GGTTCTAAGTTTAGCGTAGCCGGTT	GGTCTCG	tata	GTGATCAAACGGTTTTCGCT	gttt	tgagacc	CTTTAGGTGGGTGCGATTGCCAGTT	GGTCTTGACAAACGTGTGCTTGTAC
PA14_00830	82694..82713	yes	TATGAGGACGAATCTCCCGCTTATA	GGTTCTAAGTTTAGCGTAGCCGGTT	GGTCTCG	tata	AGGCAGGCGCCGAGGGCGAG	gttt	tgagacc	CTTTAGGTGGGTGCGATTGCCAGTT	GGTCTTGACAAACGTGTGCTTGTAC
PA14_00850	83896..83915	yes	TATGAGGACGAATCTCCCGCTTATA	GGTTCTAAGTTTAGCGTAGCCGGTT	GGTCTCG	tata	CCCAGGCCAGCGAGAGCAGC	gttt	tgagacc	CTTTAGGTGGGTGCGATTGCCAGTT	GGTCTTGACAAACGTGTGCTTGTAC
PA14_00860	84601..84620	yes	TATGAGGACGAATCTCCCGCTTATA	GGTTCTAAGTTTAGCGTAGCCGGTT	GGTCTCG	tata	GCGACCGGCGCCGTGGCTGC	gttt	tgagacc	CTTTAGGTGGGTGCGATTGCCAGTT	GGTCTTGACAAACGTGTGCTTGTAC
PA14_00875	87669..87688	yes	TATGAGGACGAATCTCCCGCTTATA	GGTTCTAAGTTTAGCGTAGCCGGTT	GGTCTCG	tata	GGCCAGGTAGACCGTGGCCA	gttt	tgagacc	CTTTAGGTGGGTGCGATTGCCAGTT	GGTCTTGACAAACGTGTGCTTGTAC
PA14_00890	88450..88469	yes	TATGAGGACGAATCTCCCGCTTATA	GGTTCTAAGTTTAGCGTAGCCGGTT	GGTCTCG	tata	CCTGTAGTAGCTGACTGAGT	gttt	tgagacc	CTTTAGGTGGGTGCGATTGCCAGTT	GGTCTTGACAAACGTGTGCTTGTAC
PA14_00900	89112..89131	yes	TATGAGGACGAATCTCCCGCTTATA	GGTTCTAAGTTTAGCGTAGCCGGTT	GGTCTCG	tata	CGCGGCTGACGAAATCGCCG	gttt	tgagacc	CTTTAGGTGGGTGCGATTGCCAGTT	GGTCTTGACAAACGTGTGCTTGTAC
PA14_00910	92425..92444	yes	TATGAGGACGAATCTCCCGCTTATA	GGTTCTAAGTTTAGCGTAGCCGGTT	GGTCTCG	tata	GTGGCGACGCTGGCGGCGTC	gttt	tgagacc	CTTTAGGTGGGTGCGATTGCCAGTT	GGTCTTGACAAACGTGTGCTTGTAC
PA14_00925	94017..94036	yes	TATGAGGACGAATCTCCCGCTTATA	GGTTCTAAGTTTAGCGTAGCCGGTT	GGTCTCG	tata	GTGCCGAAGGGATCGTCGAT	gttt	tgagacc	CTTTAGGTGGGTGCGATTGCCAGTT	GGTCTTGACAAACGTGTGCTTGTAC
PA14_00940	95350..95369	yes	TATGAGGACGAATCTCCCGCTTATA	GGTTCTAAGTTTAGCGTAGCCGGTT	GGTCTCG	tata	TGCCTTCGGACCACACCACG	gttt	tgagacc	CTTTAGGTGGGTGCGATTGCCAGTT	GGTCTTGACAAACGTGTGCTTGTAC
PA14_00960	95792..95811	yes	TATGAGGACGAATCTCCCGCTTATA	GGTTCTAAGTTTAGCGTAGCCGGTT	GGTCTCG	tata	CGGCGGGGTTTCCGGCGGGC	gttt	tgagacc	CTTTAGGTGGGTGCGATTGCCAGTT	GGTCTTGACAAACGTGTGCTTGTAC
PA14_00970	96415..96434	yes	TATGAGGACGAATCTCCCGCTTATA	GGTTCTAAGTTTAGCGTAGCCGGTT	GGTCTCG	tata	TTCCATCTGCGCTTCGGCGC	gttt	tgagacc	CTTTAGGTGGGTGCGATTGCCAGTT	GGTCTTGACAAACGTGTGCTTGTAC
PA14_00980	97371..97390	yes	TATGAGGACGAATCTCCCGCTTATA	GGTTCTAAGTTTAGCGTAGCCGGTT	GGTCTCG	tata	CAGCTTGTGGTAGCTGGTGA	gttt	tgagacc	CTTTAGGTGGGTGCGATTGCCAGTT	GGTCTTGACAAACGTGTGCTTGTAC
PA14_00990	97793..97812	yes	TATGAGGACGAATCTCCCGCTTATA	GGTTCTAAGTTTAGCGTAGCCGGTT	GGTCTCG	tata	GGATACGGCGGCCAGCAAAA	gttt	tgagacc	CTTTAGGTGGGTGCGATTGCCAGTT	GGTCTTGACAAACGTGTGCTTGTAC
PA14_01010	98937..98956	yes	TATGAGGACGAATCTCCCGCTTATA	GGTTCTAAGTTTAGCGTAGCCGGTT	GGTCTCG	tata	CACGCGTGGCGCCCGGTTCC	gttt	tgagacc	CTTTAGGTGGGTGCGATTGCCAGTT	GGTCTTGACAAACGTGTGCTTGTAC
PA14_01020	99450..99469	yes	TATGAGGACGAATCTCCCGCTTATA	GGTTCTAAGTTTAGCGTAGCCGGTT	GGTCTCG	tata	CTGGCCCTGGGCCAGGTTCT	gttt	tgagacc	CTTTAGGTGGGTGCGATTGCCAGTT	GGTCTTGACAAACGTGTGCTTGTAC
PA14_01030	101070..101089	yes	TATGAGGACGAATCTCCCGCTTATA	GGTTCTAAGTTTAGCGTAGCCGGTT	GGTCTCG	tata	TGCCAGCACGTCGATTTCCT	gttt	tgagacc	CTTTAGGTGGGTGCGATTGCCAGTT	GGTCTTGACAAACGTGTGCTTGTAC
PA14_01040	101670..101689	yes	TATGAGGACGAATCTCCCGCTTATA	GGTTCTAAGTTTAGCGTAGCCGGTT	GGTCTCG	tata	GGCGCCCGGATGCGAATGAA	gttt	tgagacc	CTTTAGGTGGGTGCGATTGCCAGTT	GGTCTTGACAAACGTGTGCTTGTAC
PA14_01060	102523..102542	yes	TATGAGGACGAATCTCCCGCTTATA	GGTTCTAAGTTTAGCGTAGCCGGTT	GGTCTCG	tata	ACGGCTGCAGGCGCTCCTGG	gttt	tgagacc	CTTTAGGTGGGTGCGATTGCCAGTT	GGTCTTGACAAACGTGTGCTTGTAC
PA14_01070	103021..103040	yes	TATGAGGACGAATCTCCCGCTTATA	GGTTCTAAGTTTAGCGTAGCCGGTT	GGTCTCG	tata	TTGTAGTACTCGAGCAGGCG	gttt	tgagacc	CTTTAGGTGGGTGCGATTGCCAGTT	GGTCTTGACAAACGTGTGCTTGTAC
PA14_01070,PA14_01080	104859..104878	yes	TATGAGGACGAATCTCCCGCTTATA	GGTTCTAAGTTTAGCGTAGCCGGTT	GGTCTCG	tata	AGCAGGTTCAGAGGTTCGGA	gttt	tgagacc	CTTTAGGTGGGTGCGATTGCCAGTT	GGTCTTGACAAACGTGTGCTTGTAC
PA14_01100	105926..105945	yes	TATGAGGACGAATCTCCCGCTTATA	GGTTCTAAGTTTAGCGTAGCCGGTT	GGTCTCG	tata	GGCGGCCTCGATGGCCTTGT	gttt	tgagacc	CTTTAGGTGGGTGCGATTGCCAGTT	GGTCTTGACAAACGTGTGCTTGTAC
PA14_01110	108643..108662	yes	TATGAGGACGAATCTCCCGCTTATA	GGTTCTAAGTTTAGCGTAGCCGGTT	GGTCTCG	tata	GGCAATCCACCTGGACCAGG	gttt	tgagacc	CTTTAGGTGGGTGCGATTGCCAGTT	GGTCTTGACAAACGTGTGCTTGTAC
PA14_01120	110932..110951	yes	TATGAGGACGAATCTCCCGCTTATA	GGTTCTAAGTTTAGCGTAGCCGGTT	GGTCTCG	tata	CGCGTTCGACATAGTTCACG	gttt	tgagacc	CTTTAGGTGGGTGCGATTGCCAGTT	GGTCTTGACAAACGTGTGCTTGTAC
PA14_01130	111113..111132	yes	TATGAGGACGAATCTCCCGCTTATA	GGTTCTAAGTTTAGCGTAGCCGGTT	GGTCTCG	tata	CTGCCGATGGTCCCAGCGGT	gttt	tgagacc	CTTTAGGTGGGTGCGATTGCCAGTT	GGTCTTGACAAACGTGTGCTTGTAC
PA14_01140	112479..112498	yes	TATGAGGACGAATCTCCCGCTTATA	GGTTCTAAGTTTAGCGTAGCCGGTT	GGTCTCG	tata	GCCGATCAGGGCTCCGGCCA	gttt	tgagacc	CTTTAGGTGGGTGCGATTGCCAGTT	GGTCTTGACAAACGTGTGCTTGTAC
PA14_01150	112988..113007	yes	TATGAGGACGAATCTCCCGCTTATA	GGTTCTAAGTTTAGCGTAGCCGGTT	GGTCTCG	tata	GAATCTCGAGATCGGCTTCG	gttt	tgagacc	CTTTAGGTGGGTGCGATTGCCAGTT	GGTCTTGACAAACGTGTGCTTGTAC
PA14_01160	113304..113323	yes	TATGAGGACGAATCTCCCGCTTATA	GGTTCTAAGTTTAGCGTAGCCGGTT	GGTCTCG	tata	GACTGTCGACCCGGACCAGG	gttt	tgagacc	CTTTAGGTGGGTGCGATTGCCAGTT	GGTCTTGACAAACGTGTGCTTGTAC
PA14_01170	115558..115577	yes	TATGAGGACGAATCTCCCGCTTATA	GGTTCTAAGTTTAGCGTAGCCGGTT	GGTCTCG	tata	GGAAGGGCCGTCGTGGCCCC	gttt	tgagacc	CTTTAGGTGGGTGCGATTGCCAGTT	GGTCTTGACAAACGTGTGCTTGTAC
PA14_01170,PA14_01180	115926..115945	yes	TATGAGGACGAATCTCCCGCTTATA	GGTTCTAAGTTTAGCGTAGCCGGTT	GGTCTCG	tata	CCCCGGTGGAGCGGCTGGAG	gttt	tgagacc	CTTTAGGTGGGTGCGATTGCCAGTT	GGTCTTGACAAACGTGTGCTTGTAC
PA14_11140	971129..971148	yes	TATGAGGACGAATCTCCCGCTTATA	GGTTCTAAGTTTAGCGTAGCCGGTT	GGTCTCG	tata	CGAGGGCGGGGCGTTCGGGA	gttt	tgagacc	CTTTAGGTGGGTGCGATTGCCAGTT	GGTCTTGACAAACGTGTGCTTGTAC
PA14_11150	971535..971554	yes	TATGAGGACGAATCTCCCGCTTATA	GGTTCTAAGTTTAGCGTAGCCGGTT	GGTCTCG	tata	CCGCGATACCTCCAGCTTTC	gttt	tgagacc	CTTTAGGTGGGTGCGATTGCCAGTT	GGTCTTGACAAACGTGTGCTTGTAC
PA14_11160	971959..971978	yes	TATGAGGACGAATCTCCCGCTTATA	GGTTCTAAGTTTAGCGTAGCCGGTT	GGTCTCG	tata	GTTCGAGGAAGAAACGTTTG	gttt	tgagacc	CTTTAGGTGGGTGCGATTGCCAGTT	GGTCTTGACAAACGTGTGCTTGTAC
PA14_11170	972173..972192	yes	TATGAGGACGAATCTCCCGCTTATA	GGTTCTAAGTTTAGCGTAGCCGGTT	GGTCTCG	tata	CCCAGCCGCGCATCGGTGTG	gttt	tgagacc	CTTTAGGTGGGTGCGATTGCCAGTT	GGTCTTGACAAACGTGTGCTTGTAC
PA14_11180	973562..973581	yes	TATGAGGACGAATCTCCCGCTTATA	GGTTCTAAGTTTAGCGTAGCCGGTT	GGTCTCG	tata	CGGGCCGAGGTCGGGCGACA	gttt	tgagacc	CTTTAGGTGGGTGCGATTGCCAGTT	GGTCTTGACAAACGTGTGCTTGTAC
PA14_11190	973843..973862	yes	TATGAGGACGAATCTCCCGCTTATA	GGTTCTAAGTTTAGCGTAGCCGGTT	GGTCTCG	tata	GCAAGAAGGCGCTGACGGAC	gttt	tgagacc	CTTTAGGTGGGTGCGATTGCCAGTT	GGTCTTGACAAACGTGTGCTTGTAC
PA14_11210	975514..975533	yes	TATGAGGACGAATCTCCCGCTTATA	GGTTCTAAGTTTAGCGTAGCCGGTT	GGTCTCG	tata	GAGCAGGTGCTGGGTGAGTC	gttt	tgagacc	CTTTAGGTGGGTGCGATTGCCAGTT	GGTCTTGACAAACGTGTGCTTGTAC
PA14_11230	976998..977017	yes	TATGAGGACGAATCTCCCGCTTATA	GGTTCTAAGTTTAGCGTAGCCGGTT	GGTCTCG	tata	CTGGCCGCCAGTCGCGCCAG	gttt	tgagacc	CTTTAGGTGGGTGCGATTGCCAGTT	GGTCTTGACAAACGTGTGCTTGTAC
PA14_11240	977716..977735	yes	TATGAGGACGAATCTCCCGCTTATA	GGTTCTAAGTTTAGCGTAGCCGGTT	GGTCTCG	tata	AGCTGTTGTGTGCGGAAGAC	gttt	tgagacc	CTTTAGGTGGGTGCGATTGCCAGTT	GGTCTTGACAAACGTGTGCTTGTAC
PA14_11250	978964..978983	yes	TATGAGGACGAATCTCCCGCTTATA	GGTTCTAAGTTTAGCGTAGCCGGTT	GGTCTCG	tata	GCGGATCAGCGCCTGTCCAA	gttt	tgagacc	CTTTAGGTGGGTGCGATTGCCAGTT	GGTCTTGACAAACGTGTGCTTGTAC
PA14_11260	979816..979835	yes	TATGAGGACGAATCTCCCGCTTATA	GGTTCTAAGTTTAGCGTAGCCGGTT	GGTCTCG	tata	GCGCCGCCAGTGATCAGGAT	gttt	tgagacc	CTTTAGGTGGGTGCGATTGCCAGTT	GGTCTTGACAAACGTGTGCTTGTAC
PA14_11270	981828..981847	yes	TATGAGGACGAATCTCCCGCTTATA	GGTTCTAAGTTTAGCGTAGCCGGTT	GGTCTCG	tata	GGTGAGGGCCAGCAGGGAAG	gttt	tgagacc	CTTTAGGTGGGTGCGATTGCCAGTT	GGTCTTGACAAACGTGTGCTTGTAC
PA14_11280	982502..982521	yes	TATGAGGACGAATCTCCCGCTTATA	GGTTCTAAGTTTAGCGTAGCCGGTT	GGTCTCG	tata	AAGCCAGCAGGAGGACGGTC	gttt	tgagacc	CTTTAGGTGGGTGCGATTGCCAGTT	GGTCTTGACAAACGTGTGCTTGTAC
PA14_11290	983767..983786	yes	TATGAGGACGAATCTCCCGCTTATA	GGTTCTAAGTTTAGCGTAGCCGGTT	GGTCTCG	tata	CGGTGAAGCGGCGGTTGGCC	gttt	tgagacc	CTTTAGGTGGGTGCGATTGCCAGTT	GGTCTTGACAAACGTGTGCTTGTAC
PA14_11310	984466..984485	yes	TATGAGGACGAATCTCCCGCTTATA	GGTTCTAAGTTTAGCGTAGCCGGTT	GGTCTCG	tata	CAACTCCGCCTGGCCGGGCC	gttt	tgagacc	CTTTAGGTGGGTGCGATTGCCAGTT	GGTCTTGACAAACGTGTGCTTGTAC
PA14_11320	985176..985195	yes	TATGAGGACGAATCTCCCGCTTATA	GGTTCTAAGTTTAGCGTAGCCGGTT	GGTCTCG	tata	AAGACGAGGGCTAACAGCAG	gttt	tgagacc	CTTTAGGTGGGTGCGATTGCCAGTT	GGTCTTGACAAACGTGTGCTTGTAC
PA14_11330	985381..985400	yes	TATGAGGACGAATCTCCCGCTTATA	GGTTCTAAGTTTAGCGTAGCCGGTT	GGTCTCG	tata	CGGCGTCCAGTTCCAGGGTC	gttt	tgagacc	CTTTAGGTGGGTGCGATTGCCAGTT	GGTCTTGACAAACGTGTGCTTGTAC
PA14_11340	986552..986571	yes	TATGAGGACGAATCTCCCGCTTATA	GGTTCTAAGTTTAGCGTAGCCGGTT	GGTCTCG	tata	GCCGGTGACGTCGAAGATGT	gttt	tgagacc	CTTTAGGTGGGTGCGATTGCCAGTT	GGTCTTGACAAACGTGTGCTTGTAC
PA14_11350	987289..987308	yes	TATGAGGACGAATCTCCCGCTTATA	GGTTCTAAGTTTAGCGTAGCCGGTT	GGTCTCG	tata	CAGCGCCTGGGTCAGGGCTT	gttt	tgagacc	CTTTAGGTGGGTGCGATTGCCAGTT	GGTCTTGACAAACGTGTGCTTGTAC
PA14_11370	987756..987775	yes	TATGAGGACGAATCTCCCGCTTATA	GGTTCTAAGTTTAGCGTAGCCGGTT	GGTCTCG	tata	GGCGATCGAGCGCAGGGTCA	gttt	tgagacc	CTTTAGGTGGGTGCGATTGCCAGTT	GGTCTTGACAAACGTGTGCTTGTAC
PA14_11380	987987..988006	yes	TATGAGGACGAATCTCCCGCTTATA	GGTTCTAAGTTTAGCGTAGCCGGTT	GGTCTCG	tata	GGTGTCATGGGCACCGCAGA	gttt	tgagacc	CTTTAGGTGGGTGCGATTGCCAGTT	GGTCTTGACAAACGTGTGCTTGTAC
PA14_11400	988452..988471	yes	TATGAGGACGAATCTCCCGCTTATA	GGTTCTAAGTTTAGCGTAGCCGGTT	GGTCTCG	tata	GGGCGCGGGCCATGTACAGC	gttt	tgagacc	CTTTAGGTGGGTGCGATTGCCAGTT	GGTCTTGACAAACGTGTGCTTGTAC
PA14_11410	990022..990041	yes	TATGAGGACGAATCTCCCGCTTATA	GGTTCTAAGTTTAGCGTAGCCGGTT	GGTCTCG	tata	CGCCCTTGGGCGTCATCGCG	gttt	tgagacc	CTTTAGGTGGGTGCGATTGCCAGTT	GGTCTTGACAAACGTGTGCTTGTAC
PA14_11420	990714..990733	yes	TATGAGGACGAATCTCCCGCTTATA	GGTTCTAAGTTTAGCGTAGCCGGTT	GGTCTCG	tata	TCAGGATGACCATCTTGCCT	gttt	tgagacc	CTTTAGGTGGGTGCGATTGCCAGTT	GGTCTTGACAAACGTGTGCTTGTAC
PA14_11430	991893..991912	yes	TATGAGGACGAATCTCCCGCTTATA	GGTTCTAAGTTTAGCGTAGCCGGTT	GGTCTCG	tata	AGGTACCTTCGATGGTCTTC	gttt	tgagacc	CTTTAGGTGGGTGCGATTGCCAGTT	GGTCTTGACAAACGTGTGCTTGTAC
PA14_11450	992385..992404	yes	TATGAGGACGAATCTCCCGCTTATA	GGTTCTAAGTTTAGCGTAGCCGGTT	GGTCTCG	tata	CCTTTCGGCGGCTTGGCTGC	gttt	tgagacc	CTTTAGGTGGGTGCGATTGCCAGTT	GGTCTTGACAAACGTGTGCTTGTAC
PA14_11460	992882..992901	yes	TATGAGGACGAATCTCCCGCTTATA	GGTTCTAAGTTTAGCGTAGCCGGTT	GGTCTCG	tata	AGGCGGCCGCGGCGAAGAAG	gttt	tgagacc	CTTTAGGTGGGTGCGATTGCCAGTT	GGTCTTGACAAACGTGTGCTTGTAC
PA14_11470	993844..993863	yes	TATGAGGACGAATCTCCCGCTTATA	GGTTCTAAGTTTAGCGTAGCCGGTT	GGTCTCG	tata	GACGGCGGCACCGGCTGCGC	gttt	tgagacc	CTTTAGGTGGGTGCGATTGCCAGTT	GGTCTTGACAAACGTGTGCTTGTAC
PA14_11480	994370..994389	yes	TATGAGGACGAATCTCCCGCTTATA	GGTTCTAAGTTTAGCGTAGCCGGTT	GGTCTCG	tata	CGACGCCGGGCAGCAGCCAC	gttt	tgagacc	CTTTAGGTGGGTGCGATTGCCAGTT	GGTCTTGACAAACGTGTGCTTGTAC
PA14_11490	995113..995132	yes	TATGAGGACGAATCTCCCGCTTATA	GGTTCTAAGTTTAGCGTAGCCGGTT	GGTCTCG	tata	ACGCGAGAACGCTGGAAAAC	gttt	tgagacc	CTTTAGGTGGGTGCGATTGCCAGTT	GGTCTTGACAAACGTGTGCTTGTAC
PA14_11510	995887..995906	yes	TATGAGGACGAATCTCCCGCTTATA	GGTTCTAAGTTTAGCGTAGCCGGTT	GGTCTCG	tata	GGGAGTCGGCAGTTTGGAGG	gttt	tgagacc	CTTTAGGTGGGTGCGATTGCCAGTT	GGTCTTGACAAACGTGTGCTTGTAC
PA14_11520	996519..996538	yes	TATGAGGACGAATCTCCCGCTTATA	GGTTCTAAGTTTAGCGTAGCCGGTT	GGTCTCG	tata	CAACGCCAGTTGCAACCACC	gttt	tgagacc	CTTTAGGTGGGTGCGATTGCCAGTT	GGTCTTGACAAACGTGTGCTTGTAC
PA14_11530	996927..996946	yes	TATGAGGACGAATCTCCCGCTTATA	GGTTCTAAGTTTAGCGTAGCCGGTT	GGTCTCG	tata	CGGCGGAAAGGCTGAGGAGC	gttt	tgagacc	CTTTAGGTGGGTGCGATTGCCAGTT	GGTCTTGACAAACGTGTGCTTGTAC
PA14_11550	999676..999695	yes	TATGAGGACGAATCTCCCGCTTATA	GGTTCTAAGTTTAGCGTAGCCGGTT	GGTCTCG	tata	GGGAATCTCATGGAGCGTCT	gttt	tgagacc	CTTTAGGTGGGTGCGATTGCCAGTT	GGTCTTGACAAACGTGTGCTTGTAC
PA14_11560	1000620..1000639	yes	TATGAGGACGAATCTCCCGCTTATA	GGTTCTAAGTTTAGCGTAGCCGGTT	GGTCTCG	tata	CTTCGCGGGGAGCGACGAAC	gttt	tgagacc	CTTTAGGTGGGTGCGATTGCCAGTT	GGTCTTGACAAACGTGTGCTTGTAC
PA14_11570	1000910..1000929	yes	TATGAGGACGAATCTCCCGCTTATA	GGTTCTAAGTTTAGCGTAGCCGGTT	GGTCTCG	tata	CGAAATCGAGGGTTTTCTTG	gttt	tgagacc	CTTTAGGTGGGTGCGATTGCCAGTT	GGTCTTGACAAACGTGTGCTTGTAC
PA14_11580	1001115..1001134	yes	TATGAGGACGAATCTCCCGCTTATA	GGTTCTAAGTTTAGCGTAGCCGGTT	GGTCTCG	tata	AAAGGGGAATACTGCGTTCC	gttt	tgagacc	CTTTAGGTGGGTGCGATTGCCAGTT	GGTCTTGACAAACGTGTGCTTGTAC
PA14_11590	1003447..1003466	yes	TATGAGGACGAATCTCCCGCTTATA	GGTTCTAAGTTTAGCGTAGCCGGTT	GGTCTCG	tata	GGTTCCGGCGAACAGCGCCA	gttt	tgagacc	CTTTAGGTGGGTGCGATTGCCAGTT	GGTCTTGACAAACGTGTGCTTGTAC
PA14_11600	1005274..1005293	yes	TATGAGGACGAATCTCCCGCTTATA	GGTTCTAAGTTTAGCGTAGCCGGTT	GGTCTCG	tata	GCAGGCCGACGCCCGAGTAC	gttt	tgagacc	CTTTAGGTGGGTGCGATTGCCAGTT	GGTCTTGACAAACGTGTGCTTGTAC
PA14_11610	1006022..1006041	yes	TATGAGGACGAATCTCCCGCTTATA	GGTTCTAAGTTTAGCGTAGCCGGTT	GGTCTCG	tata	GCGTCTGAAAATGGTGCCGA	gttt	tgagacc	CTTTAGGTGGGTGCGATTGCCAGTT	GGTCTTGACAAACGTGTGCTTGTAC
PA14_11620	1006914..1006933	yes	TATGAGGACGAATCTCCCGCTTATA	GGTTCTAAGTTTAGCGTAGCCGGTT	GGTCTCG	tata	TCAAGTCGTTTACCACCGTC	gttt	tgagacc	CTTTAGGTGGGTGCGATTGCCAGTT	GGTCTTGACAAACGTGTGCTTGTAC
PA14_11630	1009640..1009659	yes	TATGAGGACGAATCTCCCGCTTATA	GGTTCTAAGTTTAGCGTAGCCGGTT	GGTCTCG	tata	GCGCCTGGCTGGGCTCGTCC	gttt	tgagacc	CTTTAGGTGGGTGCGATTGCCAGTT	GGTCTTGACAAACGTGTGCTTGTAC
PA14_11650	1010669..1010688	yes	TATGAGGACGAATCTCCCGCTTATA	GGTTCTAAGTTTAGCGTAGCCGGTT	GGTCTCG	tata	GGGATCGGGAAGTAAGGGCG	gttt	tgagacc	CTTTAGGTGGGTGCGATTGCCAGTT	GGTCTTGACAAACGTGTGCTTGTAC
PA14_11660	1011456..1011475	yes	TATGAGGACGAATCTCCCGCTTATA	GGTTCTAAGTTTAGCGTAGCCGGTT	GGTCTCG	tata	GATTCCCAGTTCCGGTACGC	gttt	tgagacc	CTTTAGGTGGGTGCGATTGCCAGTT	GGTCTTGACAAACGTGTGCTTGTAC
PA14_11670	1012136..1012155	yes	TATGAGGACGAATCTCCCGCTTATA	GGTTCTAAGTTTAGCGTAGCCGGTT	GGTCTCG	tata	TCACGCAAACGTTGGCTAAC	gttt	tgagacc	CTTTAGGTGGGTGCGATTGCCAGTT	GGTCTTGACAAACGTGTGCTTGTAC
PA14_11680	1012409..1012428	yes	TATGAGGACGAATCTCCCGCTTATA	GGTTCTAAGTTTAGCGTAGCCGGTT	GGTCTCG	tata	GCTGCAAGGTCTGCTCGACC	gttt	tgagacc	CTTTAGGTGGGTGCGATTGCCAGTT	GGTCTTGACAAACGTGTGCTTGTAC
PA14_11690	1013659..1013678	yes	TATGAGGACGAATCTCCCGCTTATA	GGTTCTAAGTTTAGCGTAGCCGGTT	GGTCTCG	tata	TTCGGCAGGTCCTTGCCGGC	gttt	tgagacc	CTTTAGGTGGGTGCGATTGCCAGTT	GGTCTTGACAAACGTGTGCTTGTAC
PA14_11700	1014543..1014562	yes	TATGAGGACGAATCTCCCGCTTATA	GGTTCTAAGTTTAGCGTAGCCGGTT	GGTCTCG	tata	AGAGCTCTTCGGCCACCGGG	gttt	tgagacc	CTTTAGGTGGGTGCGATTGCCAGTT	GGTCTTGACAAACGTGTGCTTGTAC
PA14_11720	1015243..1015262	yes	TATGAGGACGAATCTCCCGCTTATA	GGTTCTAAGTTTAGCGTAGCCGGTT	GGTCTCG	tata	AGGTGGAGAATCAGATCGAT	gttt	tgagacc	CTTTAGGTGGGTGCGATTGCCAGTT	GGTCTTGACAAACGTGTGCTTGTAC
PA14_11730	1015486..1015505	yes	TATGAGGACGAATCTCCCGCTTATA	GGTTCTAAGTTTAGCGTAGCCGGTT	GGTCTCG	tata	CTGAGCGGTGGCTGGGCAAA	gttt	tgagacc	CTTTAGGTGGGTGCGATTGCCAGTT	GGTCTTGACAAACGTGTGCTTGTAC
PA14_11740	1017766..1017785	yes	TATGAGGACGAATCTCCCGCTTATA	GGTTCTAAGTTTAGCGTAGCCGGTT	GGTCTCG	tata	GTCGGCCTGCGCGCCGGCCG	gttt	tgagacc	CTTTAGGTGGGTGCGATTGCCAGTT	GGTCTTGACAAACGTGTGCTTGTAC
PA14_11750	1018310..1018329	yes	TATGAGGACGAATCTCCCGCTTATA	GGTTCTAAGTTTAGCGTAGCCGGTT	GGTCTCG	tata	CAGCAGGTCGAGGTGTTCGA	gttt	tgagacc	CTTTAGGTGGGTGCGATTGCCAGTT	GGTCTTGACAAACGTGTGCTTGTAC
PA14_11760	1019296..1019315	yes	TATGAGGACGAATCTCCCGCTTATA	GGTTCTAAGTTTAGCGTAGCCGGTT	GGTCTCG	tata	GGGTTCTCGGCGCTGGCGTC	gttt	tgagacc	CTTTAGGTGGGTGCGATTGCCAGTT	GGTCTTGACAAACGTGTGCTTGTAC
PA14_11770	1020669..1020688	yes	TATGAGGACGAATCTCCCGCTTATA	GGTTCTAAGTTTAGCGTAGCCGGTT	GGTCTCG	tata	CCTTGGCCATCACGTCCTTG	gttt	tgagacc	CTTTAGGTGGGTGCGATTGCCAGTT	GGTCTTGACAAACGTGTGCTTGTAC
PA14_11790	1022221..1022240	no	TATGAGGACGAATCTCCCGCTTATA	GGTTCTAAGTTTAGCGTAGCCGGTT	GGTCTCG	tata	GCGCATGGCCGGTTTGTTCG	gttt	tgagacc	CTTTAGGTGGGTGCGATTGCCAGTT	GGTCTTGACAAACGTGTGCTTGTAC
PA14_11810	1023945..1023964	yes	TATGAGGACGAATCTCCCGCTTATA	GGTTCTAAGTTTAGCGTAGCCGGTT	GGTCTCG	tata	TGGCGCCTTCGCTACCGGGA	gttt	tgagacc	CTTTAGGTGGGTGCGATTGCCAGTT	GGTCTTGACAAACGTGTGCTTGTAC
PA14_11830	1024327..1024346	yes	TATGAGGACGAATCTCCCGCTTATA	GGTTCTAAGTTTAGCGTAGCCGGTT	GGTCTCG	tata	CGCGTGGCGGCTCATGGAAC	gttt	tgagacc	CTTTAGGTGGGTGCGATTGCCAGTT	GGTCTTGACAAACGTGTGCTTGTAC
PA14_11845	1026440..1026459	yes	TATGAGGACGAATCTCCCGCTTATA	GGTTCTAAGTTTAGCGTAGCCGGTT	GGTCTCG	tata	CACGGCCAGCGAGCCCATGA	gttt	tgagacc	CTTTAGGTGGGTGCGATTGCCAGTT	GGTCTTGACAAACGTGTGCTTGTAC
PA14_11860	1027795..1027814	yes	TATGAGGACGAATCTCCCGCTTATA	GGTTCTAAGTTTAGCGTAGCCGGTT	GGTCTCG	tata	GGAGGCGCCGGTCATCGCCA	gttt	tgagacc	CTTTAGGTGGGTGCGATTGCCAGTT	GGTCTTGACAAACGTGTGCTTGTAC
PA14_11880	1028444..1028463	yes	TATGAGGACGAATCTCCCGCTTATA	GGTTCTAAGTTTAGCGTAGCCGGTT	GGTCTCG	tata	CGCATCCAGGGTGCGCACGG	gttt	tgagacc	CTTTAGGTGGGTGCGATTGCCAGTT	GGTCTTGACAAACGTGTGCTTGTAC
PA14_11890	1029302..1029321	yes	TATGAGGACGAATCTCCCGCTTATA	GGTTCTAAGTTTAGCGTAGCCGGTT	GGTCTCG	tata	GCCGGCGAGCAGAACGCGCT	gttt	tgagacc	CTTTAGGTGGGTGCGATTGCCAGTT	GGTCTTGACAAACGTGTGCTTGTAC
PA14_11900	1031063..1031082	yes	TATGAGGACGAATCTCCCGCTTATA	GGTTCTAAGTTTAGCGTAGCCGGTT	GGTCTCG	tata	AGGCGGCGAGCAGGATGACC	gttt	tgagacc	CTTTAGGTGGGTGCGATTGCCAGTT	GGTCTTGACAAACGTGTGCTTGTAC
PA14_11910	1031735..1031754	yes	TATGAGGACGAATCTCCCGCTTATA	GGTTCTAAGTTTAGCGTAGCCGGTT	GGTCTCG	tata	TAGTCCTTGAGCGCTGCTAC	gttt	tgagacc	CTTTAGGTGGGTGCGATTGCCAGTT	GGTCTTGACAAACGTGTGCTTGTAC
[truncated: 5,808 more rows]
