# Supplementary material for: Genome-wide CRISPRi-seq identified ferredoxin-NADP reductase FprB as a synergistic target for gallium therapy in Pseudomonas aeruginosa
Source: bioRxiv preprint, doi:10.1101/2024.09.01.610675, version 1 (2024-09-01)
Supplement: Supplementary Table S5 [file 610675_file06.xlsx]

## Sheet: set1-G7
	baseMean	log2FoldChange	lfcSE	stat	pvalue	padj
PA14_00010	1087.32	-0.623201	0.0734909	-8.47998	2.25228e-17	4.4553e-16
PA14_00020	948.316	-0.317297	0.0629041	-5.04414	4.55565e-07	5.02975e-06
PA14_00030	894.219	0.057986	0.0601141	0.9646	0.334745	0.646894
PA14_00050	11279.1	-0.932457	0.0385403	-24.1943	2.55247e-129	3.23143e-127
PA14_00060	984.095	-1.21542	0.0729866	-16.6526	2.89829e-62	1.51482e-60
PA14_00070	406.35	-1.58088	0.0938442	-16.8458	1.12653e-63	5.998e-62
PA14_00080	1204.55	0.0291274	0.0774892	0.37589	0.706999	0.879722
PA14_00090	248.086	-2.74077	0.156406	-17.5234	9.50279e-69	5.63931e-67
PA14_00100	1251.03	-2.52275	0.0740725	-34.0578	3.11309e-254	1.2668e-251
PA14_00110	6266.19	0.00742724	0.0344154	0.215812	0.829135	0.934183
PA14_00130	2648.17	-0.154531	0.0492853	-3.13545	0.00171593	0.0117637
PA14_00140	2842.59	0.30005	0.0510377	5.87898	4.12794e-09	5.41864e-08
PA14_00150	2700.85	0.0848797	0.0565469	1.50105	0.133343	0.379638
PA14_00160	277.218	-0.0228004	0.122811	-0.185655	0.852715	0.94237
PA14_00170	3143.62	0.00886338	0.041868	0.211698	0.832342	0.934803
PA14_00180	3046.77	0.0317159	0.0631619	0.502137	0.615571	0.836545
PA14_00190	1090.01	-0.153361	0.0781117	-1.96336	0.0496044	0.197482
PA14_00200	325.678	-1.79566	0.13507	-13.2943	2.49954e-40	9.06997e-39
PA14_00210	171.248	-0.440578	0.142804	-3.0852	0.00203415	0.0137143
PA14_00230	744.956	0.207859	0.105926	1.96231	0.0497259	0.197577
PA14_00240	235.561	-0.14761	0.129663	-1.13841	0.254948	0.553942
PA14_00250	1344.7	-0.17505	0.0576708	-3.03533	0.00240274	0.0159538
PA14_00280	2461.42	-1.58497	0.0580417	-27.3075	3.45497e-164	5.46749e-162
PA14_00290	293.219	-0.512159	0.124834	-4.10273	4.08298e-05	0.000376387
PA14_00310	8273.03	0.0769609	0.0381663	2.01646	0.043752	0.18062
PA14_00320	2774.46	0.0513562	0.0520946	0.985827	0.324218	0.634951
PA14_00340	13.6763	0.238755	0.443562	0.538268	0.590392	0.821773
PA14_00360	1702.03	0.190952	0.0714854	2.6712	0.00755806	0.0441171
PA14_00380	1542.39	0.0987122	0.0508303	1.94199	0.0521377	0.203337
PA14_00400	727.654	0.0426264	0.071979	0.592206	0.553713	0.800745
PA14_00410	595.098	0.135975	0.0909543	1.49498	0.13492	0.381671
PA14_00420	15.6291	0.0524107	0.447778	0.117046	0.906824	0.965458
PA14_00430	1678.68	-0.0227454	0.0599175	-0.379612	0.704233	0.87954
PA14_00440	1466.65	0.135111	0.0563634	2.39715	0.0165234	0.0838234
PA14_00450	1116.29	0.0330325	0.0629107	0.52507	0.599535	0.826209
PA14_00460	657.734	-0.0459834	0.0885087	-0.519536	0.603387	0.829412
PA14_00470	13755.4	0.0347745	0.126172	0.275611	0.782847	0.917252
PA14_00480	1900.83	0.0956162	0.0686882	1.39203	0.163913	0.43212
PA14_00490	1222.74	-0.0429564	0.0619896	-0.692961	0.488334	0.757894
PA14_00510	8033.62	-0.0520534	0.0358454	-1.45216	0.146456	0.401135
PA14_00520	13312.9	-0.0186446	0.0335965	-0.554955	0.578926	0.815765
PA14_00530	304.074	0.0151189	0.125915	0.120072	0.904426	0.964608
PA14_00550	2359.25	0.0952731	0.0475857	2.00214	0.0452699	0.184744
PA14_00560	3495.65	-0.0650807	0.0490661	-1.32639	0.184711	0.462345
PA14_00570	3434.95	0.086253	0.0521923	1.6526	0.0984124	0.31304
PA14_00580	2995.01	0.13639	0.0487164	2.79967	0.00511552	0.0313704
PA14_00590	2941.63	0.129732	0.0474424	2.73452	0.00624718	0.0372282
PA14_00600	13581.4	-0.0762799	0.0425962	-1.79077	0.0733307	0.258358
PA14_00620	884.804	-0.0407344	0.0800205	-0.509049	0.610718	0.833755
PA14_00630	6123.46	0.033997	0.0510057	0.666533	0.505071	0.768328
PA14_00640	3271.37	0.0281268	0.0685106	0.410546	0.681406	0.869227
PA14_00650	1203.76	0.141312	0.0782077	1.80689	0.0707799	0.252336
PA14_00660	1905.36	-0.141687	0.0609425	-2.32492	0.0200761	0.0992284
PA14_00670	2918.67	-0.0385414	0.0553003	-0.696949	0.485835	0.756194
PA14_00680	3378.16	-0.066598	0.0417421	-1.59546	0.110609	0.336612
PA14_00690	472.232	0.116947	0.093232	1.25436	0.209711	0.498215
PA14_00700	1780.32	0.0622375	0.0559116	1.11314	0.265648	0.567629
PA14_00710	3002.76	0.169597	0.0583551	2.9063	0.0036573	0.0230483
PA14_00720	1120.59	0.0390565	0.0867101	0.450426	0.652403	0.854423
PA14_00730	3158.37	0.120394	0.0585319	2.0569	0.0396957	0.16864
PA14_00740	1924.71	0.0739176	0.0507991	1.4551	0.145642	0.400446
PA14_00750	2715.76	-0.0531913	0.047464	-1.12067	0.26243	0.562905
PA14_00760	220.595	0.17448	0.124209	1.40473	0.160102	0.426813
PA14_00770	2263.45	-0.109099	0.145915	-0.747685	0.45465	0.739087
PA14_00780	1444.25	0.212791	0.0540186	3.93922	8.17484e-05	0.000715393
PA14_00790	546.784	-0.0992437	0.0937844	-1.05821	0.289959	0.596611
PA14_00800	270.672	-0.00267421	0.176912	-0.015116	0.98794	0.995842
PA14_00810	19510.2	0.0186107	0.0441126	0.421891	0.673105	0.865363
PA14_00820	13237.6	-0.0163939	0.0485362	-0.337767	0.735539	0.894613
PA14_00830	988.743	-0.0271972	0.0993078	-0.273868	0.784186	0.917715
PA14_00850	599.543	0.134583	0.0724332	1.85803	0.0631649	0.233215
PA14_00860	45.686	-0.269299	0.324111	-0.830886	0.406038	0.706049
PA14_00875	828.756	-0.0844707	0.0845344	-0.999247	0.317675	0.626877
PA14_00890	3009.08	0.0115218	0.0430679	0.267527	0.789063	0.918907
PA14_00900	2828.29	0.0126926	0.0575953	0.220376	0.825578	0.933138
PA14_00910	1272.89	-0.0839819	0.0587283	-1.43001	0.152715	0.41272
PA14_00925	2363.3	0.10021	0.0810316	1.23667	0.216208	0.506055
PA14_00940	7292.38	0.0891814	0.0368528	2.41994	0.0155233	0.0793148
PA14_00960	3423.57	0.0838576	0.0497823	1.68449	0.0920878	0.298421
PA14_00970	164.231	-0.213984	0.16186	-1.32203	0.186158	0.46411
PA14_00980	2875.25	0.00197152	0.0556591	0.0354213	0.971744	0.991318
PA14_00990	746.079	0.00367237	0.0713682	0.0514567	0.958962	0.984894
PA14_01010	373.74	0.0763043	0.0996568	0.76567	0.443872	0.731957
PA14_01020	1934.45	0.0306023	0.0637104	0.480335	0.63099	0.843975
PA14_01030	5427.11	-0.131175	0.0433289	-3.02741	0.00246655	0.0163395
PA14_01040	4684.06	-0.00282944	0.0482113	-0.0586883	0.9532	0.982341
PA14_01060	13.0557	-0.0183218	0.502964	-0.0364277	0.970941	0.991122
PA14_01070	1360.05	0.0159754	0.0587971	0.271705	0.785849	0.918309
PA14_01080	3288.15	-0.0538484	0.0524851	-1.02598	0.304903	0.613576
PA14_01100	7431.63	0.067283	0.0387995	1.73412	0.0828966	0.280607
PA14_01110	1356.53	0.0460033	0.0696484	0.660508	0.508928	0.771928
PA14_01120	1127.14	-0.0190347	0.0638767	-0.297991	0.76571	0.90956
PA14_01130	1653.39	0.0567782	0.0557223	1.01895	0.308227	0.617429
PA14_01140	6008.07	-0.00633327	0.0338747	-0.186961	0.851691	0.941944
PA14_01150	1097.13	0.371667	0.0629231	5.90668	3.49072e-09	4.60339e-08
PA14_01160	19189.9	0.0401125	0.0355074	1.1297	0.258605	0.557424
PA14_01170	3471.67	0.400389	0.137567	2.91049	0.00360858	0.0227665
PA14_01180	229.264	-0.0845337	0.141504	-0.597396	0.550243	0.79858
PA14_01190	1487.24	0.194617	0.0567845	3.4273	0.000609625	0.00459396
PA14_01200	829.94	-0.0604945	0.0758557	-0.797494	0.425164	0.719372
PA14_01220	8347.94	0.0719762	0.0673995	1.0679	0.285564	0.591351
PA14_01230	820.7	-0.0431216	0.0711092	-0.606414	0.54424	0.795887
PA14_01240	1670.94	0.0239702	0.0595776	0.402335	0.687437	0.872186
PA14_01250	771.226	0.000738146	0.0671128	0.0109986	0.991225	0.997012
PA14_01270	941.779	0.0999283	0.0663162	1.50685	0.13185	0.376893
PA14_01290	1788.49	-0.0210191	0.0510866	-0.411441	0.680749	0.868779
PA14_01310	1373.62	0.190052	0.0584638	3.25077	0.00115095	0.00824385
PA14_01320	1727.38	-0.0189846	0.0751441	-0.252643	0.800544	0.922281
PA14_01330	4181.95	-0.0685958	0.0577112	-1.1886	0.234595	0.531281
PA14_01340	2548.13	0.213711	0.0594779	3.59311	0.000326758	0.00255005
PA14_01350	1290.52	0.0537688	0.0642281	0.837154	0.402506	0.703558
PA14_01360	3567.35	0.00747623	0.0467523	0.159912	0.872951	0.951381
PA14_01380	3240.51	0.0402395	0.0531796	0.75667	0.449247	0.73566
PA14_01390	2311.31	-0.00597009	0.0558392	-0.106916	0.914856	0.967628
PA14_01400	1383.67	-0.0969177	0.0755027	-1.28363	0.19927	0.481852
PA14_01410	1124.62	0.138115	0.0636133	2.17117	0.0299182	0.135924
PA14_01430	5973.3	0.0613721	0.0396768	1.5468	0.121911	0.358037
PA14_01440	4850.49	-0.0127106	0.0373875	-0.339969	0.73388	0.893571
PA14_01460	1991.09	0.0686364	0.0548437	1.25149	0.210755	0.49891
PA14_01470	5849.46	-0.11407	0.0426476	-2.67472	0.00747922	0.0437465
PA14_01480	1477.61	0.0888021	0.0911094	0.974675	0.329722	0.643023
PA14_01490	1605.17	0.175964	0.0541226	3.25121	0.00114915	0.00824385
PA14_01500	4552.81	-0.00499138	0.0375892	-0.132788	0.894361	0.961583
PA14_01510	6146.15	0.169294	0.0448235	3.77689	0.000158798	0.00131302
PA14_01520	937.177	0.100122	0.0639532	1.56555	0.117455	0.350389
PA14_01540	2775.41	-0.027185	0.0480953	-0.565232	0.571916	0.810463
PA14_01550	626.366	-0.278167	0.0935928	-2.9721	0.00295768	0.0191042
PA14_01580	373.499	0.0192152	0.11037	0.174098	0.861789	0.945065
PA14_01600	1282.82	-0.947687	0.0708999	-13.3666	9.48292e-41	3.46309e-39
PA14_01610	362.813	0.00949479	0.101505	0.0935402	0.925474	0.970802
PA14_01620	2817.9	-0.0519781	0.0460946	-1.12764	0.259472	0.559082
PA14_01640	79.5776	0.122701	0.186621	0.657487	0.510868	0.773841
PA14_01660	133.632	0.018879	0.178359	0.105848	0.915703	0.967859
PA14_01670	352.541	-0.250507	0.0900002	-2.78341	0.00537908	0.032775
PA14_01680	1600.79	-0.140858	0.0591203	-2.38257	0.0171923	0.0869073
PA14_01690	1586.42	-0.0495009	0.0641062	-0.772169	0.440014	0.728709
PA14_01710	5190.68	-0.102921	0.0410929	-2.50458	0.0122596	0.0653346
PA14_01720	7353.92	0.0133064	0.0534043	0.249164	0.803234	0.923144
PA14_01730	1991.43	-0.0479782	0.0552171	-0.868901	0.384901	0.687393
PA14_01750	991.13	0.638495	0.0687836	9.28266	1.65304e-20	3.60819e-19
PA14_01760	12.5479	-0.206151	0.494148	-0.417185	0.676543	0.865932
PA14_01770	26400.6	-0.0482758	0.0351714	-1.37259	0.169881	0.442328
PA14_01780	879.947	0.0330097	0.0709598	0.465189	0.641796	0.848042
PA14_01790	815.223	0.482939	0.116288	4.15297	3.28195e-05	0.000306011
PA14_01800	1532.88	-0.113854	0.0531974	-2.14022	0.0323372	0.144038
PA14_01810	3809.15	0.146425	0.0785158	1.86491	0.0621934	0.230975
PA14_01830	1773.28	-0.0754813	0.0700159	-1.07806	0.281007	0.586216
PA14_01840	1260.39	0.189805	0.0603615	3.14448	0.00166383	0.0114687
PA14_01860	2463.2	0.0451296	0.043601	1.03506	0.300641	0.607575
PA14_01870	864.784	0.144274	0.0743055	1.94163	0.0521817	0.203337
PA14_01890	4243.39	0.00115844	0.0407712	0.0284132	0.977333	0.99214
PA14_01910	1443.91	-0.0244544	0.0543903	-0.44961	0.652992	0.854525
PA14_01930	3069.17	-0.0163283	0.0583598	-0.279788	0.77964	0.91693
PA14_01940	821.649	-0.0181458	0.0637827	-0.284494	0.776032	0.915332
PA14_01960	383.629	0.0535905	0.105784	0.506603	0.612433	0.834576
PA14_01970	1361.26	-0.0369501	0.0667538	-0.553528	0.579902	0.816519
PA14_01980	4400.52	0.0138585	0.0402089	0.344663	0.730347	0.891916
PA14_01990	748.91	0.0369774	0.0762358	0.485039	0.627648	0.842732
PA14_02010	4152.99	0.234694	0.0516343	4.54531	5.48549e-06	5.56065e-05
PA14_02020	1778.64	0.0710425	0.069519	1.02191	0.306821	0.616035
PA14_02030	1595.84	0.0393352	0.0680265	0.578234	0.563106	0.804014
PA14_02060	301.802	0.0963815	0.100866	0.955538	0.339306	0.649757
PA14_02070	5623.97	-0.0379566	0.045425	-0.835587	0.403387	0.70429
PA14_02090	2120.84	0.0790309	0.0483144	1.63576	0.101889	0.319111
PA14_02100	4213.71	-0.123638	0.0390783	-3.16387	0.00155687	0.0108165
PA14_02110	0.242844	-1.36776	3.53001	-0.387467	0.69841	0.87717
PA14_02130	1464.25	0.0368705	0.0646942	0.569919	0.568733	0.807796
PA14_02140	3498.04	0.000447378	0.0472055	0.00947724	0.992438	0.997693
PA14_02150	2199.88	0.00971331	0.0451789	0.214997	0.82977	0.934183
PA14_02180	5943.54	0.139953	0.0474151	2.95166	0.00316071	0.0201867
PA14_02190	2015.69	-0.0337525	0.0469275	-0.719247	0.471989	0.749805
PA14_02200	4801.2	0.0482041	0.0615802	0.782785	0.433753	0.72466
PA14_02220	825.828	0.0191209	0.0669431	0.285629	0.775163	0.914686
PA14_02230	6581.6	0.0903296	0.0813183	1.11082	0.266648	0.568047
PA14_02250	2604.93	0.0589574	0.056708	1.03967	0.298495	0.604867
PA14_02260	76.0062	0.100418	0.213976	0.469296	0.638858	0.847069
PA14_02270	855.456	0.145313	0.06566	2.21311	0.0268902	0.124346
PA14_02290	631.199	0.040301	0.0825264	0.488341	0.625308	0.841969
PA14_02300	587.816	0.0426513	0.0948296	0.449768	0.652878	0.854525
PA14_02310	454.287	0.0154045	0.0999051	0.154191	0.877459	0.954147
PA14_02330	3452.39	0.0800354	0.0635497	1.25941	0.207881	0.494694
PA14_02340	162.125	-0.161252	0.138041	-1.16814	0.242749	0.541474
PA14_02360	1141.87	0.207421	0.0587252	3.53205	0.000412351	0.00318315
PA14_02370	827.452	0.170768	0.0739095	2.3105	0.0208603	0.102538
PA14_02380	1761.86	0.0521575	0.0522438	0.998349	0.31811	0.627252
PA14_02390	260.742	-0.207581	0.115252	-1.80111	0.0716859	0.254293
PA14_02410	2338.05	-0.0175742	0.0496426	-0.354015	0.723327	0.889252
PA14_02420	1104.37	0.580537	0.0730449	7.94767	1.90051e-15	3.52677e-14
PA14_02450	4377.48	0.098357	0.04291	2.29217	0.0218957	0.106706
PA14_02460	3768.68	0.1598	0.0755159	2.11611	0.0343351	0.150467
PA14_02470	2237.82	-0.0598357	0.0508943	-1.17569	0.23972	0.538307
PA14_02490	3847.65	0.370478	0.0556567	6.65649	2.80446e-11	4.22673e-10
PA14_02500	424.087	0.124881	0.0956593	1.30548	0.191729	0.473054
PA14_02510	3435.08	0.0358408	0.0487369	0.735393	0.4621	0.744088
PA14_02520	408.172	0.0562369	0.0910081	0.617932	0.53662	0.790976
PA14_02530	99.764	-0.0781602	0.234947	-0.332671	0.739382	0.896425
PA14_02550	1499.21	0.195104	0.0608151	3.20815	0.00133591	0.00934972
PA14_02560	6185.5	0.171388	0.0641361	2.67225	0.00753435	0.0440238
PA14_02570	262.735	-0.11053	0.123717	-0.893409	0.371638	0.675735
PA14_02580	112.682	-0.436359	0.193901	-2.25042	0.0244224	0.116626
PA14_02590	388.248	-0.0253547	0.0916615	-0.276612	0.782078	0.917052
PA14_02610	1060.13	-0.0951427	0.0907406	-1.04851	0.294403	0.60111
PA14_02620	401.789	-0.23119	0.102049	-2.26549	0.0234829	0.113183
PA14_02630	1307.72	0.0972338	0.0612886	1.58649	0.112628	0.340756
PA14_02640	1556.98	-0.00714238	0.0628742	-0.113598	0.909556	0.96587
PA14_02650	210.053	0.140088	0.140233	0.998967	0.317811	0.626928
PA14_02660	1724.94	0.00858888	0.0574933	0.149389	0.881246	0.955718
PA14_02680	599.674	-0.0943322	0.0979589	-0.962976	0.335559	0.64715
PA14_02690	1248.98	-0.016313	0.0717407	-0.227388	0.820122	0.930354
PA14_02700	775.321	0.0975009	0.0795569	1.22555	0.220368	0.513052
PA14_02720	5524.53	0.0200621	0.0426122	0.470806	0.63778	0.846559
PA14_02730	2061.88	-0.106189	0.0553709	-1.91778	0.055139	0.211819
PA14_02740	286.396	0.477731	0.129562	3.68728	0.000226665	0.00182389
PA14_02750	7511.82	0.0163822	0.0444034	0.36894	0.712172	0.883196
PA14_02760	3120.54	-0.0413833	0.0522503	-0.792019	0.428349	0.721771
PA14_02770	1899.05	-0.0641154	0.0715075	-0.896625	0.369919	0.673857
PA14_02790	1598.62	-0.0418136	0.0581574	-0.718973	0.472158	0.749805
PA14_02810	1150.41	0.0524594	0.0710441	0.738406	0.460268	0.742609
PA14_02830	1712.61	0.00125635	0.0598938	0.0209763	0.983265	0.994226
PA14_02840	3335.7	0.08914	0.0709367	1.25661	0.208894	0.496482
PA14_02850	3227.4	-0.055021	0.0471691	-1.16646	0.243427	0.541628
PA14_02870	2191.56	0.00135613	0.0567465	0.0238981	0.980934	0.993843
PA14_02890	2391.2	-0.0604449	0.0519622	-1.16325	0.244729	0.543768
PA14_02900	2266.38	0.0164269	0.051105	0.321435	0.747881	0.901922
PA14_02910	538.017	0.150653	0.0933511	1.61383	0.106565	0.329133
PA14_02930	12202.1	0.105924	0.0644533	1.64342	0.100296	0.316734
PA14_02960	148.693	0.0838701	0.181976	0.460887	0.64488	0.84978
PA14_02970	1154.2	0.0387009	0.0858699	0.450693	0.652211	0.854423
PA14_02980	946.849	-0.0165262	0.0695587	-0.237586	0.812202	0.927835
PA14_02990	1676.07	0.0467506	0.0531623	0.879394	0.379188	0.681892
PA14_03000	1574.22	-0.0156584	0.0714833	-0.21905	0.826611	0.933254
PA14_03010	5045.97	-0.0129134	0.0428618	-0.301281	0.763201	0.9083
PA14_03020	248.399	-0.202616	0.136578	-1.48352	0.137936	0.386533
PA14_03030	558.039	-0.0733071	0.083273	-0.880322	0.378685	0.681679
PA14_03050	1509.43	-0.0666335	0.0518788	-1.28441	0.198999	0.481401
PA14_03070	379.187	-0.067432	0.0983652	-0.685527	0.493011	0.761037
PA14_03080	381.317	-0.0670394	0.0872442	-0.768412	0.442243	0.730489
PA14_03090	961.018	0.0226913	0.0688456	0.329597	0.741705	0.898085
PA14_03100	372.082	0.189935	0.0973716	1.95062	0.0511022	0.200991
PA14_03110	3719.88	-0.0554217	0.053571	-1.03455	0.300881	0.607843
PA14_03120	8579.8	0.0304951	0.0376385	0.81021	0.417819	0.713949
PA14_03130	1000.14	0.0670313	0.0764287	0.877044	0.380463	0.683968
PA14_03150	1395.8	0.0843345	0.0561154	1.50288	0.132871	0.378862
PA14_03160	2319.76	-0.0179819	0.0505917	-0.355433	0.722266	0.889072
PA14_03163	681.452	-0.170506	0.0683802	-2.49351	0.0126488	0.0669707
PA14_03166	875.657	0.0139864	0.0744919	0.187758	0.851067	0.941944
PA14_03170	4678.9	0.0120297	0.0399451	0.301156	0.763295	0.9083
PA14_03180	1186.82	-0.0846462	0.0627243	-1.3495	0.177178	0.452232
PA14_03190	2297.55	0.191719	0.15888	1.20669	0.227551	0.522304
PA14_03200	38.353	-0.0702764	0.328575	-0.213882	0.830639	0.934617
PA14_03210	890.461	0.0198562	0.0790104	0.251311	0.801573	0.922352
PA14_03220	1673.67	-0.0605695	0.0544658	-1.11206	0.266111	0.567803
PA14_03240	161.549	0.223098	0.137593	1.62143	0.104925	0.325753
PA14_03250	549.132	0.0151902	0.0973246	0.156078	0.875972	0.953561
PA14_03265	6393.81	0.063095	0.0480752	1.31242	0.189378	0.469285
PA14_03270	911.513	0.00186586	0.0720125	0.0259102	0.979329	0.99266
PA14_03285	2253.57	0.371391	0.0560479	6.62632	3.44163e-11	5.14619e-10
PA14_03290	2699.81	0.0120496	0.0566833	0.212578	0.831656	0.934803
PA14_03300	9404.39	0.120532	0.0618351	1.94924	0.0512665	0.201286
PA14_03310	1722.51	-0.0173251	0.0572032	-0.30287	0.761989	0.90803
PA14_03320	5532.97	0.0805907	0.0487008	1.65481	0.0979627	0.312482
PA14_03330	39.5762	-0.268355	0.294191	-0.912181	0.361673	0.665091
PA14_03340	1297.05	0.0374929	0.0595523	0.629579	0.52897	0.785334
PA14_03350	6742.57	0.304864	0.0587004	5.19356	2.06314e-07	2.35545e-06
PA14_03360	192.805	0.210413	0.148831	1.41377	0.157429	0.421661
PA14_03370	162.606	-0.0848068	0.174402	-0.486273	0.626774	0.842527
PA14_03380	611.953	0.18277	0.0860298	2.1245	0.0336283	0.148512
PA14_03390	715.628	-0.0706463	0.0796023	-0.88749	0.374815	0.678503
PA14_03400	640.294	0.0261306	0.0727264	0.3593	0.71937	0.888509
PA14_03410	978.504	-3.74691	0.0964628	-38.8431	0	0
PA14_03420	2809.72	0.10131	0.0840937	1.20472	0.22831	0.523624
PA14_03430	39.9404	-0.245638	0.274923	-0.893477	0.371602	0.675735
PA14_03450	7286.31	-0.0546844	0.0390879	-1.39901	0.161809	0.429557
PA14_03470	4.17053	-0.343134	0.858858	-0.399523	0.689508	0.872897
PA14_03480	748.45	-0.112592	0.092145	-1.2219	0.221745	0.513947
PA14_03490	430.741	0.0661476	0.122908	0.538187	0.590448	0.821773
PA14_03510	8087.63	0.0898553	0.0613445	1.46477	0.142985	0.395046
PA14_03520	1747.22	0.0388186	0.064073	0.605849	0.544615	0.795887
PA14_03530	6542.54	-0.0224015	0.0447255	-0.500866	0.616465	0.836545
PA14_03550	1667.63	0.0576274	0.0668896	0.86153	0.388946	0.69081
PA14_03560	398.628	-0.0457443	0.0976546	-0.46843	0.639477	0.847307
PA14_03580	1196.79	0.119151	0.0654883	1.81943	0.0688463	0.247768
PA14_03590	1886.66	0.0164558	0.0517398	0.31805	0.750447	0.903474
PA14_03610	712.379	0.45701	0.0824235	5.54465	2.94537e-08	3.64778e-07
PA14_03620	3837.03	-0.776716	0.0487621	-15.9287	4.00784e-57	1.96833e-55
PA14_03630	903.601	0.036789	0.0773984	0.47532	0.634559	0.845244
PA14_03650	5668.65	0.0057678	0.0375043	0.15379	0.877775	0.954147
PA14_03670	1639.86	0.0212727	0.05335	0.398739	0.690085	0.873066
PA14_03680	1927.03	0.017175	0.0482991	0.355597	0.722142	0.889072
PA14_03700	1583.11	0.315133	0.070583	4.46471	8.01756e-06	7.97138e-05
PA14_03710	3432.42	0.105466	0.0706152	1.49353	0.135298	0.382527
PA14_03720	312.568	0.0134599	0.107717	0.124956	0.900558	0.962569
PA14_03730	112.806	-1.11253	0.175405	-6.34261	2.25908e-10	3.20948e-09
PA14_03760	740.105	-0.323221	0.0719687	-4.49113	7.08455e-06	7.08082e-05
PA14_03770	441.184	-0.521556	0.09513	-5.48256	4.19209e-08	5.11399e-07
PA14_03780	4257.83	0.0428527	0.0380867	1.12514	0.260531	0.560304
PA14_03790	44.682	-0.521414	0.305979	-1.70409	0.0883649	0.29147
PA14_03800	1426.6	-0.0956805	0.0669239	-1.42969	0.152806	0.41272
PA14_03810	2836.06	0.0842407	0.046349	1.81753	0.0691359	0.248183
PA14_03830	1543.71	-0.231168	0.0611246	-3.78191	0.000155627	0.00128867
PA14_03840	372.453	0.239807	0.110761	2.1651	0.0303804	0.137472
PA14_03855	1054.99	0.09231	0.0692051	1.33386	0.18225	0.459681
PA14_03860	2298.44	0.0191737	0.0633706	0.302565	0.762221	0.90803
PA14_03870	636.044	0.117962	0.0831808	1.41814	0.15615	0.419221
PA14_03880	5854.19	-0.00810736	0.039213	-0.206752	0.836204	0.936891
PA14_03900	394.175	0.0151871	0.113723	0.133544	0.893763	0.961437
PA14_03920	2646.34	-0.0378567	0.0591519	-0.639991	0.522178	0.781416
PA14_03930	4597.18	-0.0552056	0.0530562	-1.04051	0.298102	0.604587
PA14_03940	453.533	0.0314564	0.0918176	0.342597	0.731902	0.892475
PA14_03950	3545.55	-0.0836495	0.0409301	-2.04371	0.0409819	0.1732
PA14_03960	3422.6	0.0236493	0.0499793	0.473182	0.636083	0.845334
PA14_03980	7610.46	0.000401827	0.0443979	0.00905058	0.992779	0.997858
PA14_04000	57.5239	-0.0108284	0.326579	-0.033157	0.973549	0.991475
PA14_04010	1127.78	-0.101507	0.0728895	-1.39261	0.163737	0.432056
PA14_04020	14.7066	-0.683986	0.441963	-1.54761	0.121717	0.358037
PA14_04030	3598.45	0.0756374	0.0413262	1.83025	0.0672119	0.244187
PA14_04040	3250.2	0.0935658	0.0498213	1.87803	0.0603775	0.226107
PA14_04050	4471.81	0.113707	0.0506635	2.24436	0.0248094	0.117881
PA14_04060	186.893	-0.0130652	0.162098	-0.0806006	0.93576	0.975833
PA14_04070	1069.18	-0.0692963	0.0736425	-0.940983	0.346714	0.65644
PA14_04080	8465.62	0.123019	0.0644269	1.90944	0.0562053	0.215045
PA14_04090	348.499	0.0756756	0.118885	0.636546	0.524421	0.783331
PA14_04100	1194.19	-0.0747625	0.0632017	-1.18292	0.236841	0.533734
PA14_04110	1255.22	-0.130235	0.0639339	-2.03702	0.0416479	0.174926
PA14_04140	7564.83	-0.00705729	0.0375035	-0.188177	0.850738	0.941944
PA14_04150	2990.38	0.00159437	0.0617986	0.0257994	0.979417	0.99266
PA14_04180	27.5916	-0.365974	0.415991	-0.879763	0.378987	0.681892
PA14_04190	2233.36	-0.0561083	0.0449489	-1.24827	0.211933	0.500193
PA14_04210	650.896	-0.0656693	0.0835315	-0.786162	0.431773	0.722992
PA14_04220	4803.88	0.0266539	0.0522414	0.510207	0.609907	0.833521
PA14_04230	7460.68	-0.00847571	0.0477376	-0.177548	0.859078	0.94482
PA14_04240	2847.31	0.16809	0.053748	3.12738	0.00176373	0.0120479
PA14_04250	985.009	0.163536	0.0856319	1.90976	0.0561643	0.215045
PA14_04270	2874.84	0.276785	0.0459831	6.01928	1.75193e-09	2.3651e-08
PA14_04290	303.087	-0.00884665	0.0981473	-0.0901365	0.928179	0.971314
PA14_04300	2141.39	0.0607488	0.0737892	0.823275	0.410352	0.708393
PA14_04310	5422.09	-1.35381	0.0487141	-27.7909	5.58385e-170	9.94099e-168
PA14_04320	2295.63	0.0544154	0.0636878	0.854408	0.392879	0.694878
PA14_04330	166.015	-0.0886874	0.135018	-0.656857	0.511273	0.774042
PA14_04340	1407.59	0.0864752	0.0530642	1.62963	0.103179	0.321913
PA14_04350	1230.29	-0.0359293	0.0679371	-0.528862	0.596901	0.825242
PA14_04370	4144.8	-0.0213435	0.0636288	-0.335438	0.737295	0.895395
PA14_04380	67.7048	0.059287	0.242877	0.244103	0.807151	0.925592
PA14_04390	5289.7	-0.0175937	0.035927	-0.489706	0.624342	0.841473
PA14_04410	883.946	-0.0764167	0.0945129	-0.808531	0.418785	0.714744
PA14_04420	2092.76	-0.0595975	0.0558014	-1.06803	0.285507	0.591351
PA14_04430	62.7155	-0.182056	0.233359	-0.780157	0.435298	0.72554
PA14_04440	209.981	0.35635	0.150259	2.37157	0.0177127	0.0891425
PA14_04460	2935.54	0.0153924	0.0423136	0.363769	0.71603	0.88621
PA14_04480	62.7041	-0.117071	0.217077	-0.539304	0.589677	0.821773
PA14_04490	1174.12	0.00154681	0.0598796	0.0258319	0.979391	0.99266
PA14_04510	1424.16	0.155317	0.0677449	2.29268	0.0218664	0.106655
PA14_04520	184.315	0.106789	0.20392	0.523682	0.6005	0.827139
PA14_04530	237.415	-0.050032	0.118518	-0.422148	0.672917	0.865363
PA14_04550	928.831	0.035574	0.0911177	0.390418	0.696228	0.876591
PA14_04560	6729.61	0.140609	0.0344567	4.08073	4.4894e-05	0.000409218
PA14_04570	1886.73	-0.0590412	0.0503546	-1.17251	0.240993	0.539041
PA14_04590	3331.5	0.0792863	0.0838089	0.946037	0.34413	0.655206
PA14_04610	1522.41	-0.00932159	0.0648849	-0.143664	0.885766	0.957535
PA14_04630	536.778	0.064895	0.0787436	0.82413	0.409866	0.708393
PA14_04640	6143.26	-0.0317825	0.0574434	-0.553284	0.580069	0.816519
PA14_04650	331.974	0.128541	0.10022	1.28258	0.199639	0.482333
PA14_04660	462.185	0.0557471	0.0858288	0.649515	0.516006	0.777361
PA14_04670	45.2072	0.149147	0.2708	0.550766	0.581794	0.816858
PA14_04690	48.7519	0.051934	0.25631	0.202622	0.839431	0.938062
PA14_04700	996.25	0.0239062	0.0737776	0.32403	0.745915	0.901268
PA14_04710	798.057	-0.108857	0.0748296	-1.45474	0.145742	0.400527
PA14_04730	4032.79	0.182114	0.0444463	4.0974	4.17819e-05	0.000384542
PA14_04750	545.86	-2.17384	0.0917987	-23.6806	5.71942e-124	6.6497e-122
PA14_04760	458.363	-1.40492	0.0993777	-14.1372	2.24076e-45	8.92698e-44
PA14_04780	607.023	0.0279695	0.0717826	0.389642	0.696801	0.876591
PA14_04790	3409.71	0.0267111	0.0706164	0.378256	0.705241	0.87954
PA14_04810	5959.23	-0.0362782	0.0361122	-1.0046	0.315091	0.623939
PA14_04820	3894.22	0.0967771	0.0615586	1.57211	0.115924	0.347773
PA14_04830	3538.67	0.129429	0.137517	0.941183	0.346611	0.65644
PA14_04850	0.119047	0.818774	3.53381	0.231697	0.816773	0.928959
PA14_04860	2640.85	-0.0344408	0.0568302	-0.60603	0.544495	0.795887
PA14_04870	1033.89	-0.131549	0.0645848	-2.03683	0.0416667	0.174926
PA14_04900	166.788	-2.6565	0.156736	-16.9489	1.96088e-64	1.06392e-62
PA14_04910	2965.43	0.0700911	0.0448327	1.56339	0.11796	0.351291
PA14_04920	9.08685	-0.87454	0.567963	-1.53978	0.123613	0.360955
PA14_04940	4291.76	0.0617843	0.0448451	1.37773	0.168288	0.439786
PA14_04950	59.483	0.330759	0.315366	1.04881	0.294265	0.601086
PA14_04960	25.288	-0.456799	0.354579	-1.28828	0.197647	0.479849
PA14_04970	2078.71	0.23054	0.147278	1.56534	0.117502	0.350389
PA14_04980	1039.32	-0.000536096	0.0713399	-0.00751467	0.994004	0.998366
PA14_05000	900.849	0.0821923	0.0792473	1.03716	0.29966	0.60663
PA14_05010	961.186	0.112834	0.0768912	1.46745	0.142253	0.393788
PA14_05020	4141.81	0.0278842	0.0512527	0.544052	0.586405	0.820016
PA14_05030	1.58168	-0.265069	1.39771	-0.189645	0.849587	0.941414
PA14_05040	724.053	-0.06776	0.0819964	-0.826377	0.40859	0.708393
PA14_05050	3202.11	-0.0144216	0.0530393	-0.271904	0.785696	0.918309
PA14_05060	3218.79	-0.0483152	0.0527052	-0.916706	0.359297	0.663092
PA14_05070	6545.08	-0.00367533	0.0577769	-0.0636125	0.949279	0.981267
PA14_05080	575.48	0.0605581	0.0921456	0.657201	0.511052	0.773914
PA14_05110	1239.5	0.125098	0.0688647	1.81657	0.0692828	0.248398
PA14_05120	728.295	-0.0228627	0.0788678	-0.289886	0.771903	0.912586
PA14_05130	3907.65	0.06845	0.0513856	1.33208	0.182832	0.460272
PA14_05150	1259.49	-0.0246616	0.0699064	-0.352781	0.724253	0.889839
PA14_05160	2776.65	-0.125847	0.0623813	-2.01738	0.0436561	0.180377
PA14_05180	730.434	-0.179929	0.0730568	-2.46287	0.013783	0.0717748
PA14_05190	6634.04	0.0726024	0.0469622	1.54597	0.122111	0.358037
PA14_05200	2089.54	-0.0780988	0.0519125	-1.50443	0.13247	0.377945
PA14_05210	1010.51	-0.029019	0.0693494	-0.418447	0.675621	0.865883
PA14_05220	1133.3	-0.047144	0.0702965	-0.670645	0.502447	0.766508
PA14_05230	6528.49	0.0319895	0.0441805	0.724063	0.469027	0.749579
PA14_05250	1781.18	0.130612	0.0889287	1.46872	0.141908	0.393318
PA14_05260	1161.4	-0.763754	0.0702383	-10.8737	1.53751e-27	4.1123e-26
PA14_05270	1975.01	0.0194417	0.0551458	0.35255	0.724426	0.889839
PA14_05280	5498.92	0.539814	0.0380753	14.1776	1.26168e-45	5.06184e-44
PA14_05290	520.379	-1.73885	0.108422	-16.0377	6.96958e-58	3.45267e-56
PA14_05300	764.495	0.118178	0.0913674	1.29344	0.195859	0.477338
PA14_05310	293.443	-0.187565	0.140017	-1.33958	0.180381	0.457335
PA14_05320	5413.34	-0.0198702	0.0560275	-0.354651	0.722851	0.889137
PA14_05330	4958.51	0.00298576	0.0500489	0.0596569	0.952429	0.98221
PA14_05340	283.254	0.112693	0.134906	0.835342	0.403525	0.704315
PA14_05360	967.065	-0.0315354	0.0824007	-0.382708	0.701936	0.879221
PA14_05380	1304.76	0.0281596	0.067655	0.416223	0.677247	0.865932
PA14_05390	3630.45	0.0669278	0.0557281	1.20097	0.229763	0.524763
PA14_05400	4254.98	0.154271	0.0434952	3.54685	0.000389866	0.00301775
PA14_05410	630.632	-0.385524	0.105446	-3.65613	0.000256047	0.00204014
PA14_05420	1595.75	-0.0262057	0.058546	-0.447609	0.654436	0.854727
PA14_05430	35.9801	0.152847	0.282848	0.540386	0.588931	0.821734
PA14_05440	506.79	0.296103	0.0912777	3.24398	0.00117872	0.00841497
PA14_05460	758.958	0.0871651	0.086701	1.00535	0.314727	0.623652
PA14_05480	2774.34	0.0318837	0.0408836	0.779865	0.43547	0.725614
PA14_05510	1197.8	-0.0293078	0.0619188	-0.473326	0.635981	0.845334
PA14_05520	6767.94	0.0154519	0.0408996	0.3778	0.705579	0.87954
PA14_05530	1395.8	-0.47059	0.0593914	-7.92354	2.30841e-15	4.26982e-14
PA14_05540	463.485	-0.307657	0.0946478	-3.25054	0.00115185	0.00824385
PA14_05550	66.1106	-0.347048	0.218177	-1.59067	0.111684	0.338877
PA14_05560	3.4716	0.922118	0.959818	0.960721	0.336692	0.648676
PA14_05580	1455.75	0.0760213	0.0649954	1.16964	0.242146	0.540872
PA14_05590	9634.92	0.0522202	0.0375954	1.38901	0.164831	0.4341
PA14_05600	1384.12	0.0649713	0.0963633	0.674232	0.500164	0.765029
PA14_05620	1121.21	-0.205297	0.0594299	-3.45444	0.00055144	0.00418316
PA14_05630	2436.51	0.0196338	0.0638093	0.307694	0.758315	0.907462
PA14_05650	1221.15	0.0250096	0.0617968	0.404708	0.685692	0.871842
PA14_05660	1921.53	0.330439	0.0544178	6.07226	1.26121e-09	1.72719e-08
PA14_05690	2658.7	-0.0320001	0.0568384	-0.563001	0.573434	0.811843
PA14_05700	3695.01	-0.0519795	0.0426102	-1.21988	0.222509	0.515298
PA14_05740	1667.05	-0.0323818	0.0532568	-0.608032	0.543167	0.795887
PA14_05750	939.733	-0.0512217	0.088323	-0.579936	0.561957	0.802978
PA14_05770	2300.79	0.0381165	0.050807	0.750221	0.453122	0.738186
PA14_05775	443.634	0.158078	0.0837902	1.88659	0.0592156	0.222968
PA14_05790	1641.36	0.0115309	0.0568454	0.202846	0.839255	0.938062
PA14_05810	238.875	-0.145947	0.119382	-1.22252	0.22151	0.513702
PA14_05820	110.213	-0.286622	0.162679	-1.76188	0.0780887	0.269678
PA14_05840	6013.31	0.0160845	0.0452756	0.355258	0.722397	0.889072
PA14_05850	837.11	0.102748	0.108005	0.951327	0.341438	0.652224
PA14_05860	1705.92	0.0201557	0.0565715	0.356288	0.721625	0.889072
PA14_05870	343.491	-0.11214	0.140579	-0.797706	0.425041	0.719372
PA14_05880	1932.93	0.0461848	0.0500059	0.923586	0.355702	0.662539
PA14_05890	3717.26	-0.037738	0.0475131	-0.794266	0.42704	0.720631
PA14_05910	608.63	-0.132914	0.0876617	-1.51621	0.129466	0.372884
PA14_05920	43.896	-3.78385	0.392426	-9.6422	5.30408e-22	1.20388e-20
PA14_05950	359.041	-0.0312751	0.0905118	-0.345537	0.729691	0.891647
PA14_05960	694.074	0.517801	0.0852639	6.07293	1.25599e-09	1.72419e-08
PA14_05970	682.889	-0.076269	0.0797987	-0.955767	0.33919	0.649757
PA14_05990	990.878	0.227726	0.0735284	3.09711	0.00195417	0.0132377
PA14_06010	29.0767	0.386665	0.428607	0.902144	0.36698	0.670952
PA14_06030	2900.2	-0.0393203	0.0430024	-0.914375	0.36052	0.664284
PA14_06040	565.066	0.18613	0.102282	1.81977	0.0687939	0.247736
PA14_06060	1485.94	0.0373471	0.0672967	0.554962	0.57892	0.815765
PA14_06070	4385.85	0.0782284	0.0457064	1.71154	0.0869812	0.28894
PA14_06080	763.852	0.150449	0.0737817	2.03912	0.0414385	0.174577
PA14_06090	90.2839	-0.282466	0.221612	-1.2746	0.202451	0.487063
PA14_06120	886.607	0.00985764	0.0950017	0.103763	0.917358	0.968709
PA14_06130	899.642	0.0825257	0.0730404	1.12986	0.258533	0.557424
PA14_06150	5492.62	0.033398	0.0399025	0.836991	0.402598	0.703558
PA14_06160	4251.91	0.0293776	0.0493888	0.594824	0.551961	0.79932
PA14_06170	1998.13	0.0186791	0.0623419	0.299623	0.764465	0.908649
PA14_06180	42.8646	0.0135228	0.254011	0.0532371	0.957543	0.984092
PA14_06190	1050.61	0.0346228	0.0597798	0.579172	0.562473	0.803513
PA14_06200	2473.46	-0.277581	0.0485924	-5.71244	1.11366e-08	1.41619e-07
PA14_06210	1796.08	-0.0222101	0.0514407	-0.431762	0.665914	0.861599
PA14_06230	768.589	0.0977233	0.0785922	1.24342	0.213712	0.503107
PA14_06240	1500.73	0.00579876	0.053226	0.108946	0.913245	0.966835
PA14_06250	3229.75	-0.010052	0.0470527	-0.213634	0.830833	0.934617
PA14_06260	1721.78	-0.0238127	0.0678503	-0.35096	0.725619	0.889931
PA14_06270	3396.99	0.0473915	0.0436616	1.08543	0.277733	0.581707
PA14_06280	2220.41	-0.0705634	0.0558466	-1.26352	0.206401	0.493027
PA14_06290	1920.69	0.0160302	0.0481324	0.333043	0.739102	0.896425
PA14_06300	350.593	-0.121692	0.10227	-1.18991	0.23408	0.530451
PA14_06310	441.683	-0.344246	0.133117	-2.58604	0.00970866	0.0543323
PA14_06320	1686.13	-0.778223	0.0837584	-9.29128	1.52447e-20	3.34036e-19
PA14_06330	623.618	-0.211144	0.073547	-2.87087	0.00409344	0.0254678
PA14_06340	3426.38	0.0807706	0.0417831	1.93309	0.0532246	0.206694
PA14_06350	512.956	-0.378948	0.0991368	-3.82247	0.000132121	0.00110204
PA14_06360	2129.94	0.15048	0.0462475	3.25379	0.00113878	0.00819255
PA14_06390	1835.44	0.0740711	0.0565834	1.30906	0.190514	0.470961
PA14_06400	959.758	-0.0342049	0.0641163	-0.533482	0.5937	0.823931
PA14_06420	8243.71	0.153946	0.0374554	4.11012	3.95462e-05	0.000365738
PA14_06430	4599.13	0.0569041	0.047401	1.20048	0.229952	0.524763
PA14_06450	3699.64	0.0628387	0.0455775	1.37872	0.167981	0.439741
PA14_06460	3717.98	0.0476552	0.0492886	0.96686	0.333614	0.646023
PA14_06480	407.669	0.0766734	0.106342	0.721008	0.470905	0.749579
PA14_06500	5964.39	-0.401441	0.0392106	-10.2381	1.33848e-24	3.31536e-23
PA14_06510	11.1125	-0.432325	0.591353	-0.731078	0.464732	0.746216
PA14_06530	909.702	0.165892	0.0876828	1.89195	0.0584972	0.221675
PA14_06540	957.537	-0.587897	0.0630094	-9.3303	1.0557e-20	2.33112e-19
PA14_06570	395.499	-0.148871	0.0999993	-1.48872	0.13656	0.385497
PA14_06580	577.059	0.058201	0.091405	0.636737	0.524296	0.783331
PA14_06600	117.593	-0.692946	0.155254	-4.46332	8.07003e-06	8.00958e-05
PA14_06620	2735.15	0.0186444	0.0447672	0.416474	0.677063	0.865932
PA14_06640	2638.81	0.129067	0.0491822	2.62426	0.00868384	0.0497705
PA14_06650	1462.72	0.0639726	0.0676472	0.94568	0.344312	0.655206
PA14_06660	564.358	-0.107015	0.0888599	-1.20431	0.22847	0.523779
PA14_06670	2793.43	-0.0194543	0.0483725	-0.402177	0.687554	0.872186
PA14_06680	98.9121	-0.36162	0.165614	-2.18351	0.0289985	0.132801
PA14_06690	1037.41	0.028531	0.0587365	0.485745	0.627148	0.842527
PA14_06700	300.659	-0.0608151	0.128483	-0.473332	0.635976	0.845334
PA14_06710	1384.41	0.340444	0.0764759	4.45164	8.52153e-06	8.44298e-05
PA14_06720	1343.4	-0.108096	0.0637182	-1.69647	0.0897967	0.293443
PA14_06730	394.34	0.0916157	0.110371	0.830072	0.406498	0.706258
PA14_06740	1457.66	0.00394147	0.0652479	0.0604076	0.951831	0.982033
PA14_06750	2845.15	0.0661119	0.0516779	1.27931	0.200789	0.484497
PA14_06770	3535.64	0.00973691	0.0572441	0.170095	0.864936	0.946552
PA14_06790	5461.71	-0.0271585	0.0381765	-0.711395	0.47684	0.751059
PA14_06800	1349.7	-0.116912	0.0687872	-1.69962	0.089202	0.292732
PA14_06810	671.888	-0.00961396	0.0835413	-0.11508	0.908382	0.965458
PA14_06830	0.511563	-2.42191	3.14556	-0.769947	0.441331	0.729519
PA14_06840	6015.72	0.00425085	0.0446202	0.0952674	0.924102	0.969835
PA14_06860	1647.52	-0.097262	0.0607986	-1.59974	0.109656	0.334966
PA14_06870	1460.49	-0.0758347	0.0586938	-1.29204	0.196343	0.477816
PA14_06875	14853.7	0.160643	0.0480731	3.34164	0.000832856	0.00615406
PA14_06880	359.527	0.0768481	0.102833	0.747309	0.454877	0.739087
PA14_06890	1897.57	-0.0474541	0.0542424	-0.874852	0.381654	0.68503
PA14_06900	1428.6	0.020344	0.0538848	0.377546	0.705768	0.87954
PA14_06920	1094.69	-0.0284616	0.100936	-0.281977	0.777961	0.916191
PA14_06930	1050.66	-0.0348743	0.0769262	-0.453347	0.650299	0.853582
PA14_06940	4737.14	-0.0194023	0.0546477	-0.355044	0.722557	0.889072
PA14_06960	3713.36	0.058847	0.0463017	1.27095	0.203748	0.488943
PA14_06970	1277.62	-0.00319965	0.0684063	-0.0467743	0.962693	0.98748
PA14_06980	841.836	-0.0207005	0.0772911	-0.267825	0.788834	0.918828
PA14_06990	1019	0.0398758	0.0714863	0.557811	0.576974	0.814223
PA14_07000	3406.13	0.0728454	0.0490604	1.48481	0.137594	0.386145
PA14_07010	18.7632	-0.520998	0.382513	-1.36204	0.173186	0.447748
PA14_07020	6846.08	-0.0150544	0.0374201	-0.402308	0.687457	0.872186
PA14_07030	2499.24	0.137913	0.0536595	2.57014	0.0101657	0.056667
PA14_07040	1563.44	-0.0504979	0.0663126	-0.761513	0.446351	0.733653
PA14_07050	640.382	0.026968	0.0860778	0.313298	0.754054	0.905054
PA14_07060	1733.83	-0.0563554	0.0578889	-0.973509	0.3303	0.643023
PA14_07070	1511.82	0.0630433	0.0574065	1.09819	0.272121	0.575241
PA14_07090	2066.38	-0.0611063	0.083828	-0.728949	0.466033	0.747464
PA14_07110	460.413	-1.9602	0.0977099	-20.0615	1.60273e-89	1.21744e-87
PA14_07130	928.587	-0.644456	0.0712509	-9.04488	1.49832e-19	3.18505e-18
PA14_07140	4080.47	-0.0168038	0.0513491	-0.327246	0.743482	0.89916
PA14_07150	2302.88	0.182336	0.0596595	3.05628	0.00224104	0.0149674
PA14_07170	438.884	0.13702	0.086876	1.57719	0.114752	0.3448
PA14_07190	2011.53	-0.0209805	0.0659915	-0.317927	0.750541	0.903474
PA14_07200	6334.14	0.054558	0.0457883	1.19153	0.233447	0.529648
PA14_07210	181.487	-0.270859	0.146038	-1.85472	0.0636369	0.234805
PA14_07230	40.571	-2.6919	0.337748	-7.97015	1.5848e-15	2.96021e-14
PA14_07240	5066.43	0.0167685	0.0381775	0.439224	0.660499	0.858318
PA14_07250	2474.95	0.00318065	0.0499676	0.0636543	0.949246	0.981267
PA14_07260	406.663	-0.108558	0.0998571	-1.08713	0.276978	0.580966
PA14_07280	3348.35	0.171878	0.0588233	2.92193	0.0034787	0.0220202
PA14_07290	3896.13	0.0374065	0.0428813	0.872327	0.38303	0.686418
PA14_07300	738.438	0.131451	0.0850189	1.54614	0.12207	0.358037
PA14_07310	1596.44	0.301339	0.0569749	5.28898	1.23e-07	1.43592e-06
PA14_07330	2262.22	0.0148674	0.0551338	0.269661	0.787421	0.918592
PA14_07340	56.8575	0.375607	0.235503	1.59492	0.110731	0.336804
PA14_07355	244.488	-2.3361	0.172828	-13.5169	1.2428e-41	4.68888e-40
PA14_07360	670.491	0.157185	0.0876076	1.79419	0.0727825	0.257392
PA14_07370	1167.27	-0.0302579	0.0619867	-0.488135	0.625454	0.841969
PA14_07380	1267.58	0.00151873	0.0762733	0.0199117	0.984114	0.994412
PA14_07400	1267.64	-0.0273349	0.0625031	-0.437337	0.661867	0.859311
PA14_07410	1748.44	0.046539	0.0542258	0.858245	0.390757	0.69264
PA14_07420	99.5759	-0.0209881	0.206967	-0.101408	0.919227	0.969322
PA14_07430	331.612	-0.0948835	0.107384	-0.883589	0.376918	0.679956
PA14_07440	6227.12	0.210211	0.05855	3.59029	0.000330314	0.00257428
PA14_07450	1491.53	-0.100839	0.0573912	-1.75704	0.0789109	0.271471
PA14_07460	575.847	0.056336	0.0785143	0.717526	0.47305	0.749805
PA14_07470	1155.95	0.0320434	0.074323	0.431137	0.666369	0.861599
PA14_07480	1613.54	0.00755561	0.0590595	0.127932	0.898203	0.962131
PA14_07500	338.968	0.421425	0.105888	3.9799	6.89452e-05	0.000608963
PA14_07520	12.143	-2.28173	0.563436	-4.04967	5.12907e-05	0.000462347
PA14_07530	427.103	0.296086	0.0848831	3.48816	0.000486359	0.00372418
PA14_07550	9.36983	-1.19545	0.573502	-2.08447	0.0371174	0.16056
PA14_07560	279.441	-0.494759	0.127213	-3.88921	0.000100572	0.000864191
PA14_07570	210.909	0.223592	0.130587	1.71221	0.0868582	0.2887
PA14_07580	1332.32	0.00119216	0.0590866	0.0201765	0.983903	0.994412
PA14_07590	1990	-0.488604	0.0609126	-8.02139	1.04556e-15	1.9594e-14
PA14_07600	449.065	-0.354811	0.0805172	-4.40665	1.04981e-05	0.000102586
PA14_07620	3688.01	-0.109879	0.0507463	-2.16525	0.0303683	0.137472
PA14_07630	430.502	-0.025244	0.0955908	-0.264084	0.791715	0.919927
PA14_07650	790.247	0.271742	0.0996225	2.72772	0.00637732	0.037964
PA14_07660	1956.73	0.04475	0.059828	0.747979	0.454473	0.739087
PA14_07680	674.046	-0.092289	0.0777465	-1.18705	0.235208	0.531939
PA14_07690	1784.77	0.0583951	0.0506547	1.15281	0.24899	0.547232
PA14_07700	388.157	0.154258	0.0960639	1.60579	0.108321	0.332311
PA14_07710	9816.22	-0.0421348	0.0352439	-1.19552	0.231884	0.527151
PA14_07730	648.919	-0.129017	0.078616	-1.64111	0.100775	0.317717
PA14_07760	2907.09	-0.173832	0.0664742	-2.61502	0.00892211	0.0509068
PA14_07770	1310.75	-0.579525	0.0541082	-10.7105	9.08695e-27	2.37469e-25
PA14_07780	422.535	0.0489649	0.109483	0.447239	0.654703	0.85488
PA14_07790	104.232	0.0260741	0.188741	0.138147	0.890124	0.959827
PA14_07800	2028.3	0.160966	0.0991538	1.6234	0.104504	0.324623
PA14_07810	1287.63	0.0325893	0.0719971	0.452647	0.650803	0.853701
PA14_07820	623.618	0.0655232	0.0795202	0.823981	0.40995	0.708393
PA14_07840	1329.54	0.067368	0.0664315	1.0141	0.310536	0.619658
PA14_07850	554.417	0.00570392	0.0965717	0.0590641	0.952901	0.98221
PA14_07860	4957.36	0.113166	0.0419265	2.69916	0.00695144	0.0409962
PA14_07870	42.1685	-0.0723308	0.285332	-0.253497	0.799884	0.922281
PA14_07890	2373.38	-0.149214	0.0608598	-2.45177	0.0142154	0.0736897
PA14_07900	795.544	0.0371771	0.0727842	0.510785	0.609502	0.833493
PA14_07910	212.055	-2.50091	0.168272	-14.8623	5.78902e-50	2.53693e-48
PA14_07930	1382.02	0.0895495	0.0763008	1.17364	0.24054	0.538724
PA14_07940	719.825	0.0325679	0.0873444	0.372868	0.709247	0.880684
PA14_07950	855.584	-0.487272	0.0688179	-7.0806	1.43531e-12	2.30337e-11
PA14_07960	613.575	-5.14381	0.143825	-35.7644	3.94509e-280	2.24752e-277
PA14_07970	1725.69	-0.156387	0.0585728	-2.66996	0.00758598	0.0442094
PA14_07980	2854.86	-0.0175764	0.0544526	-0.322784	0.746859	0.901644
PA14_07990	53.6645	0.0708879	0.241814	0.293151	0.769407	0.91186
PA14_08000	9748.74	0.217094	0.0363436	5.97339	2.32368e-09	3.10751e-08
PA14_08010	715.2	0.0575823	0.0928115	0.620422	0.53498	0.790698
PA14_08020	690.966	0.0229585	0.075019	0.306035	0.759578	0.907462
PA14_08030	1900.46	0.221799	0.0743203	2.98436	0.0028417	0.0183968
PA14_08040	2791.49	0.0392594	0.069844	0.562102	0.574046	0.812134
PA14_08050	479.106	0.242319	0.142846	1.69637	0.0898165	0.293443
PA14_08060	2365.9	0.0224528	0.0500347	0.448745	0.653616	0.854525
PA14_08070	6728.64	0.120461	0.0370429	3.25194	0.00114621	0.00823449
PA14_08090	3149.53	0.0193275	0.0856222	0.22573	0.821411	0.93126
PA14_08100	1027.12	0.0450549	0.0614687	0.732974	0.463574	0.744778
PA14_08110	1360.58	-0.0614773	0.0703449	-0.873942	0.38215	0.685479
PA14_08120	876.43	0.293314	0.0717459	4.08824	4.34654e-05	0.000398107
PA14_08130	794.907	0.1688	0.0686963	2.45719	0.0140028	0.0727867
PA14_08140	174.402	-3.76927	0.196432	-19.1887	4.60198e-82	3.15873e-80
PA14_08150	899.398	0.0120389	0.065425	0.18401	0.854006	0.942786
PA14_08160	621.608	-0.0144418	0.0826808	-0.174669	0.86134	0.945065
PA14_08180	1392.93	-0.0564508	0.0601349	-0.938737	0.347866	0.656832
PA14_08190	3490.16	0.1138	0.0529431	2.14948	0.0315961	0.141735
PA14_08200	4067.17	0.107803	0.045768	2.35541	0.0185022	0.0927877
PA14_08210	3993.51	-0.0261921	0.0577938	-0.453199	0.650406	0.853582
PA14_08220	481.62	0.157945	0.104168	1.51626	0.129455	0.372884
PA14_08230	47.2728	0.0619971	0.255633	0.242524	0.808374	0.926435
PA14_08250	893.565	-0.118632	0.119327	-0.994178	0.320136	0.629338
PA14_08260	861.414	0.0281443	0.0653653	0.43057	0.666781	0.861763
PA14_08270	1470.1	0.125062	0.0876703	1.4265	0.153724	0.414269
PA14_08280	461.197	-0.0803196	0.0857316	-0.936873	0.348824	0.657493
PA14_08300	2004.33	-0.372509	0.0536206	-6.94712	3.72815e-12	5.8672e-11
PA14_08310	3874.06	-0.0719967	0.0498262	-1.44496	0.14847	0.404474
PA14_08320	2727.76	0.0138886	0.0515244	0.269555	0.787503	0.918592
PA14_08330	4704.74	0.06089	0.0498821	1.22068	0.222209	0.514812
PA14_08340	586.861	-0.149065	0.0952679	-1.5647	0.117654	0.350563
PA14_08350	1953.6	0.0365987	0.0577117	0.634164	0.525974	0.784522
PA14_08360	4706.77	-0.0308976	0.0486259	-0.635413	0.525159	0.783817
PA14_08370	3609.89	0.045672	0.188924	0.241748	0.808975	0.926634
PA14_08380	2164.48	0.0554423	0.0626752	0.884597	0.376374	0.679405
PA14_08390	1822.8	-0.0407403	0.0517361	-0.787465	0.431009	0.722619
PA14_08400	364.087	-0.771572	0.110503	-6.9824	2.90184e-12	4.60495e-11
PA14_08420	3828.13	0.110607	0.0385798	2.86697	0.00414418	0.0257183
PA14_08430	876.812	-0.032584	0.0726817	-0.448311	0.653929	0.854525
PA14_08440	4010.99	-0.00329371	0.0510466	-0.0645235	0.948553	0.981173
PA14_08450	4239.78	-0.0647402	0.0472947	-1.36887	0.171041	0.444535
PA14_08460	1251.66	-0.0804657	0.0575013	-1.39937	0.161701	0.429557
PA14_08470	1127.13	-1.1139	0.059547	-18.7062	4.40332e-78	2.88342e-76
PA14_08480	4129.53	0.179149	0.0484891	3.69462	0.000220212	0.00177698
PA14_08490	3433.43	0.0953163	0.0468162	2.03597	0.0417534	0.174961
PA14_08500	292.325	-0.0992394	0.148261	-0.669355	0.503269	0.766692
PA14_08510	489.236	-1.36481	0.117946	-11.5715	5.74906e-31	1.67104e-29
PA14_08520	3906.2	0.0742304	0.041707	1.77981	0.0751076	0.262508
PA14_08540	3539.96	0.100013	0.0472317	2.11749	0.0342185	0.150187
PA14_08560	2185.13	-0.10933	0.0539675	-2.02586	0.0427796	0.177635
PA14_08620	206.946	-1.14771	0.132663	-8.65129	5.09205e-18	1.0287e-16
PA14_08630	1867.47	-0.0943266	0.0511323	-1.84475	0.0650732	0.238253
PA14_08640	3512.73	-0.039235	0.0560235	-0.700331	0.483721	0.754588
PA14_08650	215.218	0.737368	0.141	5.22955	1.69926e-07	1.95966e-06
PA14_08680	244.167	-2.03712	0.173821	-11.7197	1.0105e-31	3.02991e-30
PA14_08690	1519.41	-2.90101	0.0859153	-33.7659	6.25141e-250	2.37429e-247
PA14_08695	10815.3	-3.31058	0.0598697	-55.2964	0	0
PA14_08720	531.289	-3.03894	0.105942	-28.6851	5.85143e-181	1.19056e-178
PA14_08730	1546.22	0.120365	0.0823052	1.46242	0.143625	0.396622
PA14_08740	686.787	-3.04289	0.111423	-27.3095	3.27375e-164	5.32874e-162
PA14_08750	470.848	-4.6373	0.143004	-32.4278	1.11223e-230	3.33492e-228
PA14_08760	1881.66	-0.439876	0.057749	-7.61702	2.59592e-14	4.62155e-13
PA14_08780	3193.34	-0.757002	0.0600338	-12.6096	1.86984e-36	6.22951e-35
PA14_08790	831.87	0.433729	0.079031	5.48809	4.06296e-08	4.9885e-07
PA14_08820	669.509	-0.230765	0.0860452	-2.68191	0.00732031	0.0429493
PA14_08830	467.893	0.219659	0.0874014	2.51322	0.0119634	0.0639957
PA14_08850	990.959	0.389614	0.0971954	4.00856	6.10903e-05	0.000542105
PA14_08870	1.0642	0.127948	2.08183	0.0614594	0.950993	0.982033
PA14_08880	356.085	0.114754	0.106672	1.07577	0.282031	0.58728
PA14_08930	50.2317	0.439069	0.298044	1.47317	0.140706	0.390835
PA14_08970	9.29055	-0.107109	0.557377	-0.192166	0.847612	0.940196
PA14_08990	149.157	0.0395507	0.169451	0.233405	0.815447	0.928749
PA14_09000	862.34	0.0455997	0.0773738	0.589343	0.555631	0.800767
PA14_09020	129.796	-4.3086	0.244777	-17.6021	2.37155e-69	1.43731e-67
PA14_09030	136.618	-3.81672	0.224647	-16.9899	9.75927e-65	5.34601e-63
PA14_09040	892.942	-2.73946	0.085845	-31.9117	1.8396e-223	4.99057e-221
PA14_09050	28.0987	-2.44991	0.415759	-5.89261	3.80138e-09	5.00149e-08
PA14_09070	1.71508	-0.25058	1.41837	-0.176668	0.85977	0.94482
PA14_09080	190.733	-0.264713	0.337135	-0.785184	0.432345	0.723351
PA14_09090	58.2928	-3.49385	0.335865	-10.4025	2.41394e-25	6.19469e-24
PA14_09100	147.52	-0.505308	0.193983	-2.60492	0.00918968	0.0519897
PA14_09115	82.5605	-0.0873518	0.19792	-0.441349	0.65896	0.8571
PA14_09130	673.261	0.303329	0.0739111	4.10397	4.06115e-05	0.000374982
PA14_09150	3661.33	0.0104801	0.0451933	0.231896	0.816619	0.928959
PA14_09160	694.609	0.0655979	0.0805717	0.814155	0.415556	0.710938
PA14_09180	2.64416	-2.18856	1.26547	-1.72944	0.0837295	0.282443
PA14_09195	2997.06	-0.291314	0.0472418	-6.16645	6.98414e-10	9.72828e-09
PA14_09200	244.407	-1.62456	0.143059	-11.3559	6.93594e-30	1.98563e-28
PA14_09210	734.317	-0.126904	0.0730286	-1.73773	0.0822583	0.279276
PA14_09220	3453.48	-0.011642	0.0511398	-0.22765	0.819919	0.930354
PA14_09230	2391.77	-0.00629053	0.0539038	-0.116699	0.907098	0.965458
PA14_09260	1556.75	-0.00332222	0.0584361	-0.0568523	0.954663	0.983203
PA14_09270	652.519	0.0498939	0.0695794	0.717078	0.473326	0.749805
PA14_09280	1647.08	0.0430495	0.0713053	0.603735	0.54602	0.796065
PA14_09290	303.771	0.022392	0.108503	0.206373	0.836499	0.936891
PA14_09300	5156.58	0.000974527	0.0442741	0.0220112	0.982439	0.994226
PA14_09320	768.883	0.00869579	0.0899378	0.0966867	0.922975	0.969609
PA14_09340	492.997	0.361451	0.097448	3.70917	0.000207938	0.00169474
PA14_09350	1509.84	0.0632404	0.0643532	0.982708	0.325751	0.63664
PA14_09370	2720.15	0.00928905	0.0575571	0.161389	0.871787	0.951086
PA14_09380	69.1011	-0.611058	0.241056	-2.53492	0.0112473	0.0610479
PA14_09400	4273.84	0.0674736	0.0508962	1.32571	0.184936	0.462705
PA14_09410	5208.77	0.0744855	0.0530779	1.40332	0.16052	0.427129
PA14_09440	5281.34	0.302878	0.0409107	7.40338	1.32764e-13	2.22459e-12
PA14_09450	7782.19	-0.0490037	0.0345996	-1.41631	0.156685	0.419866
PA14_09460	1576.46	-0.0371049	0.0601289	-0.61709	0.537175	0.791181
PA14_09470	11497.7	-0.022408	0.0638216	-0.351103	0.725511	0.889931
PA14_09480	2730.85	0.0140957	0.0709878	0.198565	0.842603	0.938647
PA14_09490	139.732	-0.0204867	0.156841	-0.130621	0.896075	0.961583
PA14_09500	7635.74	0.0709409	0.0372674	1.90357	0.0569668	0.217229
PA14_09520	786.396	0.0846179	0.0763458	1.10835	0.26771	0.56951
PA14_09530	2364.65	0.0457037	0.0503418	0.907868	0.363948	0.667879
PA14_09540	1539.76	-0.0312622	0.0585116	-0.534291	0.59314	0.823573
PA14_09550	368.747	0.282232	0.108087	2.61115	0.00902386	0.0512041
PA14_09570	159.475	-0.373112	0.145351	-2.56698	0.010259	0.0570757
PA14_09580	3731.58	0.0461408	0.0564066	0.818003	0.413355	0.709846
PA14_09600	48.7673	-0.120666	0.28742	-0.419826	0.674612	0.865406
PA14_09610	50.6765	-0.629642	0.244718	-2.57293	0.0100843	0.0563236
PA14_09630	969.027	-0.0695282	0.0835532	-0.832143	0.405328	0.705732
PA14_09680	2123.16	0.0426557	0.0730198	0.584166	0.559109	0.801146
PA14_09690	5637.75	-0.0261287	0.0365256	-0.715352	0.474391	0.749805
PA14_09700	5008.25	0.00363423	0.0369374	0.0983889	0.921623	0.969518
PA14_09710	1388.38	0.0954086	0.0933743	1.02179	0.306882	0.616035
PA14_09730	12893.4	0.00593361	0.0337393	0.175866	0.860399	0.944953
PA14_09740	3193.16	0.00667382	0.0428769	0.155651	0.876308	0.953561
PA14_09760	807.606	0.111111	0.0682194	1.62873	0.103371	0.322158
PA14_09770	823.687	-0.316077	0.0842629	-3.75109	0.00017607	0.00144743
PA14_09780	834.52	-0.0581148	0.0962384	-0.603863	0.545934	0.796065
PA14_09790	2976.85	0.0189661	0.0453878	0.417868	0.676044	0.865932
PA14_09810	2958.46	-0.0732918	0.0466357	-1.57158	0.116048	0.34796
PA14_09820	3705.82	-0.0346561	0.0523796	-0.661633	0.508206	0.771612
PA14_09850	134.485	-0.209764	0.171597	-1.22242	0.221549	0.513702
PA14_09870	2342.03	0.0627054	0.0518271	1.2099	0.226319	0.520691
PA14_09880	3984.31	0.0409393	0.0472368	0.866682	0.386116	0.688268
PA14_09890	1909.4	0.1307	0.0543097	2.40657	0.0161031	0.0818789
PA14_09900	1370.91	0.0956498	0.0704137	1.3584	0.174338	0.448842
PA14_09910	3710.78	0.00156655	0.0471054	0.0332562	0.97347	0.991475
PA14_09920	39.4023	-0.226794	0.268711	-0.844004	0.398667	0.69991
PA14_09930	594.281	-0.0126827	0.100098	-0.126703	0.899176	0.962172
PA14_09940	323.566	-0.101361	0.114293	-0.886859	0.375155	0.678588
PA14_09950	54.4338	-0.383895	0.244351	-1.57108	0.116163	0.348124
PA14_09960	244.644	0.389995	0.152884	2.55093	0.0107437	0.0591371
PA14_09970	1914.1	0.049969	0.0535348	0.933392	0.350617	0.65923
PA14_09980	28.5072	-0.545266	0.377164	-1.4457	0.148262	0.404358
PA14_09990	5072.57	-0.00110837	0.0499787	-0.0221768	0.982307	0.994226
PA14_10010	1769.5	0.0691545	0.0575519	1.2016	0.229518	0.524705
PA14_10020	386.784	-0.040186	0.108414	-0.370671	0.710882	0.88233
PA14_10040	1729.83	0.00801462	0.19159	0.0418322	0.966632	0.988672
PA14_10050	796.069	0.234272	0.18524	1.26469	0.205981	0.492435
PA14_10070	4307.23	0.182115	0.188587	0.965677	0.334206	0.646146
PA14_10080	3839.51	0.00517541	0.0450082	0.114988	0.908455	0.965458
PA14_10090	1134.27	-0.00872071	0.0589858	-0.147844	0.882466	0.956073
PA14_10110	1376.52	0.119032	0.0861737	1.3813	0.167187	0.438116
PA14_10120	1455.84	0.0893926	0.0683075	1.30868	0.190643	0.470985
PA14_10130	769.276	0.16315	0.0750054	2.17517	0.029617	0.135093
PA14_10140	890.545	0.108095	0.065562	1.64874	0.0992	0.314332
PA14_10160	235.373	-0.128478	0.142276	-0.903022	0.366514	0.670315
PA14_10170	17.3678	-0.155935	0.4551	-0.34264	0.731869	0.892475
PA14_10180	710.986	0.104047	0.0714345	1.45654	0.145245	0.399546
PA14_10190	6591.51	-0.0256005	0.0455673	-0.561817	0.574241	0.812177
PA14_10200	2086.2	0.215221	0.0539289	3.99082	6.58447e-05	0.00058248
PA14_10210	2175.41	0.222743	0.0508426	4.38104	1.18116e-05	0.000114875
PA14_10220	410.226	0.101893	0.0977887	1.04197	0.297424	0.604288
PA14_10230	3236.03	0.152153	0.0469721	3.23923	0.00119854	0.00853508
PA14_10240	390.399	-0.00436469	0.0971098	-0.0449459	0.96415	0.988055
PA14_10250	24279.3	0.018665	0.0414202	0.450627	0.652259	0.854423
PA14_10260	72.8632	0.16243	0.242646	0.669411	0.503233	0.766692
PA14_10270	4091.48	-0.0724092	0.0501076	-1.44508	0.148437	0.404474
PA14_10280	2099.67	-0.0312934	0.0593948	-0.526871	0.598283	0.826134
PA14_10290	3775.35	0.08725	0.0684802	1.27409	0.202631	0.487081
PA14_10300	873.482	0.00602422	0.0849272	0.0709339	0.94345	0.979558
PA14_10320	412.544	-0.0380123	0.0848036	-0.448239	0.653981	0.854525
PA14_10330	1664.2	0.041379	0.0535719	0.772402	0.439876	0.728709
PA14_10340	1226.56	0.8071	0.0801729	10.067	7.73013e-24	1.88199e-22
PA14_10350	2177.75	0.158161	0.0625399	2.52897	0.0114398	0.0616581
PA14_10360	2060.59	-0.0105683	0.0598773	-0.176499	0.859902	0.94482
PA14_10370	3195.86	0.402218	0.0510818	7.87398	3.43524e-15	6.29279e-14
PA14_10380	798.29	0.137271	0.0870131	1.57759	0.11466	0.344706
PA14_10400	142.618	-1.74188	0.153655	-11.3363	8.67615e-30	2.44693e-28
PA14_10410	5374.36	0.0563264	0.0367975	1.53071	0.125841	0.365803
PA14_10420	496.465	-0.125743	0.0922452	-1.36314	0.172838	0.447165
PA14_10440	938.307	-0.0837879	0.0700022	-1.19693	0.231333	0.526529
PA14_10470	6488.89	-0.00874763	0.0442365	-0.197747	0.843243	0.938647
PA14_10480	1009.85	-0.227092	0.0785086	-2.89257	0.00382102	0.0239476
PA14_10490	2216.23	0.00348403	0.0534288	0.0652088	0.948008	0.981162
PA14_10500	4940.5	-0.0201303	0.0669127	-0.300844	0.763533	0.9083
PA14_10530	1336.81	0.155154	0.0795828	1.94959	0.0512247	0.20126
PA14_10540	206.417	-0.0845474	0.140759	-0.600653	0.548071	0.796703
PA14_10550	3195.3	-0.00737813	0.0427862	-0.172442	0.86309	0.945582
PA14_10560	1638.5	0.209364	0.0997801	2.09826	0.0358826	0.156048
PA14_10570	1146.43	0.222664	0.0700691	3.17778	0.00148406	0.0103485
PA14_10590	2358.66	0.0268408	0.0480766	0.558292	0.576645	0.813961
PA14_10600	412.492	0.032663	0.0918277	0.355699	0.722066	0.889072
PA14_10610	1449.69	0.448136	0.217259	2.06268	0.0391432	0.167417
PA14_10620	1045.96	0.2187	0.0850775	2.5706	0.0101522	0.0566478
PA14_10630	2738.84	-0.0763295	0.0594862	-1.28315	0.199441	0.482059
PA14_10640	513.082	0.0693065	0.0810718	0.854878	0.392618	0.694878
PA14_10650	8317.42	-0.00489652	0.0438545	-0.111654	0.911098	0.966361
PA14_10660	699.833	-0.185351	0.0826501	-2.2426	0.0249227	0.11832
PA14_10680	3689.8	0.026074	0.0432561	0.602783	0.546653	0.796084
PA14_10700	205.776	0.0314748	0.136464	0.230646	0.81759	0.929517
PA14_10710	1288.69	-0.0503358	0.069661	-0.722582	0.469937	0.749579
PA14_10730	1189.95	0.171638	0.066883	2.56624	0.0102808	0.0571414
PA14_10740	1621.21	0.273426	0.0720382	3.79556	0.00014731	0.00122336
PA14_10750	3036.31	0.0497087	0.0424468	1.17108	0.241566	0.54011
PA14_10770	4690.98	-0.0647522	0.0463388	-1.39737	0.162304	0.429745
PA14_10780	6199.14	0.000246066	0.0460289	0.00534589	0.995735	0.998739
PA14_10790	190.864	0.0167756	0.136614	0.122795	0.902269	0.963639
PA14_10800	271.951	0.0900182	0.1197	0.752031	0.452033	0.737677
PA14_10820	4059.51	0.0754754	0.05013	1.50559	0.132172	0.377434
PA14_10830	797.634	-0.034902	0.0921615	-0.378704	0.704908	0.87954
PA14_10840	11947.7	0.00242879	0.0401501	0.0604928	0.951763	0.982033
PA14_10850	7937.15	-0.125203	0.0389276	-3.21631	0.00129851	0.00913287
PA14_10870	3078.79	0.62011	0.0535267	11.5851	4.90613e-31	1.43334e-29
PA14_10890	1925.76	0.0332536	0.0988837	0.33629	0.736652	0.895011
PA14_10900	2560.44	0.0667853	0.0464796	1.43687	0.150754	0.408778
PA14_10910	2400.77	0.0211542	0.047764	0.442891	0.657845	0.8571
PA14_10920	1450.55	0.199042	0.0616912	3.22643	0.00125345	0.00883773
PA14_10940	1820.96	0.124809	0.0606086	2.05926	0.0394691	0.168313
PA14_10950	3181.77	-0.0678831	0.0420775	-1.61329	0.106682	0.329133
PA14_10970	164.924	0.0190073	0.137168	0.13857	0.88979	0.959699
PA14_10990	6619.74	-0.164172	0.0457677	-3.58707	0.000334416	0.00259996
PA14_11000	239.418	0.0465625	0.147305	0.316096	0.75193	0.904125
PA14_11010	3346.05	0.0372601	0.0471051	0.790999	0.428944	0.721826
PA14_11020	1960.03	0.0494471	0.055651	0.888522	0.37426	0.678007
PA14_11030	1678.38	0.137736	0.0558517	2.4661	0.0136593	0.0713916
PA14_11050	1782.53	0.127842	0.0481288	2.65625	0.00790157	0.0457008
PA14_11060	384.984	-0.0639018	0.102179	-0.625389	0.531716	0.78844
PA14_11070	10.7087	0.188295	0.509521	0.369552	0.711716	0.883057
PA14_11080	2522.73	0.264402	0.0648173	4.07918	4.51947e-05	0.000411301
PA14_11090	2619.1	-0.0340792	0.0563065	-0.605245	0.545016	0.795887
PA14_11100	833.229	-0.132306	0.0685892	-1.92896	0.0537354	0.208022
PA14_11110	270.465	-0.124691	0.108205	-1.15236	0.249173	0.547232
PA14_11120	2308.73	-0.0482969	0.0501537	-0.962976	0.335559	0.64715
PA14_11130	4287.47	0.060694	0.0496459	1.22254	0.221504	0.513702
PA14_11140	100.238	0.210014	0.229743	0.914124	0.360652	0.664284
PA14_11150	3807.61	0.202971	0.0687215	2.95353	0.0031416	0.020155
PA14_11160	4446.1	0.0187946	0.0473702	0.396761	0.691544	0.874454
PA14_11170	196.144	0.189007	0.167792	1.12644	0.25998	0.559964
PA14_11180	4022	0.138749	0.04341	3.19625	0.00139226	0.00973215
PA14_11190	968.528	0.0407665	0.0831569	0.490236	0.623967	0.841358
PA14_11210	1743.68	0.00581564	0.0635753	0.0914763	0.927114	0.971198
PA14_11230	824.152	-1.31724	0.23274	-5.65971	1.51625e-08	1.91108e-07
PA14_11240	36.8237	0.23426	0.289337	0.809642	0.418146	0.714082
PA14_11250	238.738	-2.8083	0.145558	-19.2934	6.10566e-83	4.29431e-81
PA14_11270	1982.26	0.147723	0.0613878	2.40638	0.0161113	0.0818789
PA14_11280	888.783	-0.0597097	0.0689938	-0.865436	0.3868	0.688927
PA14_11290	4357.29	0.0178185	0.0575892	0.309408	0.757011	0.907171
PA14_11310	185.532	-0.145636	0.144523	-1.0077	0.313597	0.623609
PA14_11320	3624.07	0.0612311	0.0441359	1.38733	0.165341	0.434478
PA14_11330	3755.25	-0.0741736	0.0490117	-1.51339	0.130182	0.374379
PA14_11340	2051.44	0.12585	0.0792848	1.58731	0.112442	0.340373
PA14_11350	1585.46	-0.0162206	0.066776	-0.24291	0.808075	0.926278
PA14_11370	2102.13	0.0144715	0.0561584	0.257691	0.796645	0.921511
PA14_11380	92.2371	-2.34631	0.233577	-10.0451	9.65444e-24	2.33057e-22
PA14_11400	2377.72	-0.0607068	0.0486953	-1.24667	0.21252	0.501128
PA14_11410	1664.48	0.049528	0.0588426	0.841704	0.399954	0.701088
PA14_11420	1761.64	-0.0542307	0.0532097	-1.01919	0.308114	0.617419
PA14_11430	81.3153	-0.901907	0.218578	-4.12626	3.68715e-05	0.00034323
PA14_11450	303.567	0.256225	0.124494	2.05814	0.0395771	0.16835
PA14_11460	370.582	-2.43718	0.113506	-21.4719	2.85409e-102	2.5015e-100
PA14_11470	3692.91	0.0292066	0.0395588	0.738309	0.460327	0.742609
PA14_11480	806.613	-0.0450235	0.0689745	-0.652755	0.513914	0.775625
PA14_11490	1813.41	0.075499	0.0495615	1.52334	0.127674	0.369031
PA14_11510	88.2603	-3.00567	0.229216	-13.1128	2.78025e-39	9.65796e-38
PA14_11520	2069.67	0.124792	0.0801822	1.55635	0.119624	0.354629
PA14_11530	122.498	-0.0122789	0.180646	-0.0679723	0.945808	0.981023
PA14_11550	147.526	0.244631	0.159063	1.53795	0.124061	0.361738
PA14_11560	2628.12	-0.0374475	0.0452529	-0.827516	0.407945	0.707855
PA14_11570	210.174	-0.391687	0.159172	-2.46078	0.0138634	0.0721276
PA14_11580	3004.5	0.10106	0.0765463	1.32025	0.186753	0.464802
PA14_11590	2246.83	0.0431636	0.0544404	0.79286	0.42786	0.721586
PA14_11600	1575.74	-0.205747	0.0731403	-2.81304	0.00490752	0.0301598
PA14_11610	1450.84	-0.490922	0.068138	-7.20482	5.81225e-13	9.48779e-12
PA14_11620	2897.62	0.341975	0.0527483	6.48315	8.98251e-11	1.31551e-09
PA14_11630	1825.73	-0.00769468	0.0606048	-0.126965	0.898968	0.962131
PA14_11650	721.98	0.0773845	0.0796348	0.971742	0.331179	0.643489
PA14_11660	2137.77	0.0374377	0.0539911	0.693405	0.488056	0.757823
PA14_11670	341.571	0.0740178	0.0992512	0.745763	0.455811	0.739605
PA14_11680	3520.59	-0.0040179	0.051507	-0.0780068	0.937823	0.976563
PA14_11690	2131.11	-0.0380826	0.0654646	-0.581729	0.560749	0.802056
PA14_11720	968.41	0.010041	0.0689527	0.145622	0.88422	0.956559
PA14_11730	629.656	0.166345	0.0749338	2.21989	0.0264265	0.123219
PA14_11740	705.224	0.00469362	0.0852855	0.0550342	0.956111	0.983832
PA14_11750	81.1201	0.0452762	0.22171	0.204213	0.838187	0.937959
PA14_11760	4549.39	-0.10013	0.0394618	-2.53739	0.0111683	0.0608862
PA14_11770	6496.57	0.0233432	0.0459871	0.507603	0.611731	0.834339
PA14_11790	5152.66	-0.0153623	0.0384428	-0.399615	0.68944	0.872897
PA14_11830	1997.19	0.334002	0.0658817	5.06972	3.98397e-07	4.42431e-06
PA14_11845	1045.38	-0.461634	0.0721507	-6.39819	1.5723e-10	2.25061e-09
PA14_11860	854.533	-0.25637	0.0691534	-3.70726	0.000209513	0.00170513
PA14_11880	7962.35	0.203883	0.0315183	6.46871	9.88431e-11	1.44018e-09
PA14_11890	2031.4	-0.0581946	0.0501651	-1.16006	0.246024	0.545165
PA14_11900	310.647	0.0621735	0.105055	0.59182	0.553971	0.800745
PA14_11910	1970.35	0.112405	0.0702845	1.59929	0.109756	0.335091
PA14_11920	1599.8	-0.0520557	0.0720338	-0.722656	0.469891	0.749579
PA14_11930	2917.89	0.0769489	0.0451135	1.70567	0.088069	0.290763
PA14_11940	120.8	-0.168579	0.166876	-1.01021	0.312396	0.622062
PA14_11960	658.076	-0.140247	0.0767349	-1.82768	0.0675969	0.245
PA14_11970	1138.59	0.0704368	0.0687905	1.02393	0.305867	0.615299
PA14_11980	521.202	-0.10821	0.089338	-1.21125	0.225801	0.520172
PA14_11990	4283.01	0.00950531	0.0477702	0.19898	0.842278	0.938647
PA14_12010	1347.83	-1.15359	0.0547638	-21.0648	1.67216e-98	1.40093e-96
PA14_12020	1046.97	-0.125686	0.0611691	-2.05473	0.0399048	0.169276
PA14_12030	524.506	-0.106837	0.114827	-0.930417	0.352155	0.659286
PA14_12050	636.107	-0.197389	0.0838565	-2.35389	0.0185783	0.0929239
PA14_12060	5216.94	-0.134968	0.0438679	-3.07669	0.00209316	0.0140788
PA14_12070	1521.54	0.232133	0.0788304	2.94472	0.00323249	0.0206221
PA14_12080	574.922	-0.175475	0.0817823	-2.14563	0.0319021	0.142828
PA14_12090	4.40473	-3.92307	1.27194	-3.08432	0.00204019	0.0137387
PA14_12110	84.5669	-1.61084	0.20074	-8.02449	1.0195e-15	1.91686e-14
PA14_12120	1997.88	-0.0232349	0.0525171	-0.442425	0.658182	0.8571
PA14_12130	2183.91	-0.324223	0.0485412	-6.67934	2.40025e-11	3.65621e-10
PA14_12140	569.346	-0.000193866	0.0821247	-0.00236063	0.998116	0.999553
PA14_12160	2483.42	0.118498	0.0570551	2.0769	0.0378104	0.162769
PA14_12170	1857.14	0.0247459	0.0593914	0.416659	0.676928	0.865932
PA14_12180	2848.64	-0.0837307	0.0518156	-1.61594	0.106108	0.328378
PA14_12200	2468.54	-0.35676	0.0492234	-7.24777	4.2369e-13	6.95609e-12
PA14_12210	1119.85	-0.579537	0.0636109	-9.11066	8.18801e-20	1.76694e-18
PA14_12230	27.1328	-3.37027	0.447728	-7.5275	5.17223e-14	9.01107e-13
PA14_12260	2176.38	0.0683773	0.0558079	1.22523	0.220489	0.513124
PA14_12270	1235.66	0.0868585	0.0561649	1.54649	0.121986	0.358037
PA14_12280	1747.56	-0.193466	0.0503691	-3.84097	0.000122549	0.00103585
PA14_12300	12556.1	-0.0525125	0.0476437	-1.10219	0.270379	0.573259
PA14_12310	5901.65	-0.0358563	0.0457035	-0.784543	0.432722	0.723351
PA14_12330	3702.05	0.600875	0.0661972	9.07704	1.11568e-19	2.38949e-18
PA14_12350	723.846	0.102723	0.0711364	1.44402	0.148732	0.404838
PA14_12360	418.158	0.0693494	0.093537	0.741411	0.458444	0.74197
PA14_12370	34.1525	0.0185419	0.406526	0.0456106	0.963621	0.988055
PA14_12390	97.2478	-1.93475	0.213503	-9.06196	1.28127e-19	2.73385e-18
PA14_12400	137.91	-0.00171154	0.15338	-0.0111589	0.991097	0.997012
PA14_12410	294.763	-1.50397	0.115504	-13.0209	9.31235e-39	3.2153e-37
PA14_12430	32605.5	0.0302774	0.0315593	0.959383	0.337366	0.648999
PA14_12440	5016.63	0.358502	0.0443733	8.07923	6.51777e-16	1.24603e-14
PA14_12450	1154.84	0.0384222	0.0751816	0.511058	0.60931	0.833493
PA14_12470	8322.97	0.036681	0.0531913	0.689605	0.490442	0.759722
PA14_12490	2321.32	-0.0555497	0.0576759	-0.963136	0.335479	0.64715
PA14_12530	31792.8	-0.0528271	0.0451231	-1.17073	0.241706	0.540212
PA14_12540	101.165	-0.119761	0.167114	-0.716638	0.473597	0.749805
PA14_12550	5160.84	-0.0585806	0.0407255	-1.43843	0.150313	0.408166
PA14_12560	4780.62	0.0457064	0.0547448	0.834901	0.403774	0.704533
PA14_12570	7352.25	0.124963	0.0452067	2.76426	0.00570516	0.034394
PA14_12590	2407.16	0.227214	0.0561593	4.04588	5.21277e-05	0.000468409
PA14_12620	7655.04	0.0244147	0.0355275	0.687207	0.491952	0.759993
PA14_12640	588.981	-0.0696658	0.0773981	-0.900096	0.368069	0.671864
PA14_12650	95.5262	-0.150251	0.196807	-0.763442	0.4452	0.732401
PA14_12670	335.743	-0.0441093	0.102551	-0.430122	0.667107	0.861988
PA14_12680	3473.89	-0.0218419	0.0395076	-0.552853	0.580364	0.816519
PA14_12690	636.404	0.0877078	0.0938825	0.934229	0.350186	0.658853
PA14_12700	1318.73	-0.092951	0.055112	-1.68658	0.0916834	0.297788
PA14_12710	1607.33	-0.0585406	0.0553012	-1.05858	0.289792	0.596611
PA14_12730	2125.75	0.031081	0.0590005	0.526793	0.598337	0.826134
PA14_12750	1799.52	-0.0750768	0.063047	-1.19081	0.233729	0.529866
PA14_12760	1199.33	-0.0634561	0.0624246	-1.01652	0.30938	0.618434
PA14_12770	1845.78	0.142739	0.066895	2.13378	0.0328606	0.1458
PA14_12780	193.886	0.164162	0.147312	1.11438	0.265115	0.567592
PA14_12810	34416	0.0116357	0.0295338	0.39398	0.693596	0.876129
PA14_12820	1446.77	-0.0163325	0.0560087	-0.291606	0.770588	0.912586
PA14_12840	4286.09	0.0461197	0.0433248	1.06451	0.287098	0.592609
PA14_12850	5.47899	-0.485376	0.706146	-0.687359	0.491856	0.759993
PA14_12860	598.103	-0.613262	0.0809837	-7.57267	3.65639e-14	6.44906e-13
PA14_12870	8343.37	-0.0126315	0.0334254	-0.377902	0.705504	0.87954
PA14_12890	1684.22	0.0570073	0.0552009	1.03272	0.301734	0.608906
PA14_12900	2183.45	-0.048486	0.0603494	-0.803421	0.421731	0.717195
PA14_12910	58.7614	0.0463354	0.279161	0.165981	0.868172	0.948631
PA14_12920	3912.06	0.043443	0.0591729	0.734172	0.462844	0.744445
PA14_12940	2855.58	0.0347513	0.0484029	0.71796	0.472782	0.749805
PA14_12960	1562.08	0.0114953	0.0596914	0.19258	0.847288	0.940196
PA14_12970	2984.39	-0.104374	0.0593455	-1.75875	0.0786194	0.270959
PA14_12980	541.647	0.0288721	0.0765891	0.376975	0.706193	0.87954
PA14_12990	1238.58	0.020468	0.0780888	0.262112	0.793235	0.92016
PA14_13000	935.049	0.146433	0.0674948	2.16955	0.0300413	0.136371
PA14_13010	1270.64	0.00601913	0.0655224	0.0918638	0.926806	0.971198
PA14_13030	137.015	0.462693	0.190953	2.42307	0.0153898	0.0787743
PA14_13040	1221.85	0.0967569	0.0782209	1.23697	0.216099	0.506055
PA14_13050	1221.71	0.0625828	0.0672257	0.930936	0.351887	0.659286
PA14_13060	7742.1	-0.0722629	0.0478428	-1.51042	0.130935	0.375598
PA14_13070	604.314	0.0527151	0.0764232	0.689779	0.490333	0.759722
PA14_13090	965.487	-0.0332875	0.0788684	-0.422064	0.672978	0.865363
PA14_13110	981.92	0.14642	0.0808374	1.81129	0.0700967	0.250842
PA14_13130	2827.22	0.0264412	0.0616817	0.428672	0.668162	0.863156
PA14_13140	1059.05	-0.225266	0.081621	-2.75991	0.00578177	0.0346724
PA14_13150	1566.36	0.0391045	0.0683607	0.572032	0.567301	0.806969
PA14_13170	5875.68	0.159656	0.087427	1.82617	0.0678253	0.245334
PA14_13200	282.006	-0.048371	0.12802	-0.377841	0.705549	0.87954
PA14_13210	3883.91	0.0855558	0.0491625	1.74027	0.0818122	0.2785
PA14_13220	3080.15	-0.0683492	0.0489715	-1.39569	0.162807	0.430598
PA14_13230	705.3	-0.110366	0.0738167	-1.49513	0.13488	0.381671
PA14_13240	2883.36	-0.0405834	0.0477423	-0.850051	0.395297	0.696572
PA14_13250	4690.74	0.518192	0.0391335	13.2417	5.04177e-40	1.79519e-38
PA14_13260	221.67	0.0861125	0.132659	0.649129	0.516255	0.777361
PA14_13280	1551.52	0.00972386	0.0963827	0.100888	0.919639	0.969322
PA14_13290	175.504	0.0734061	0.133438	0.550112	0.582243	0.816858
PA14_13300	1463.7	-0.250887	0.193234	-1.29836	0.194163	0.47563
PA14_13320	7397.68	0.0463366	0.0350224	1.32306	0.185817	0.46392
PA14_13330	4382.8	0.30146	0.0446311	6.75448	1.43347e-11	2.20715e-10
PA14_13340	1505.55	-0.0911721	0.054258	-1.68034	0.0928904	0.300097
PA14_13350	1500.76	-0.638826	0.057294	-11.15	7.16465e-29	1.98141e-27
PA14_13360	1925.3	-0.132069	0.0560883	-2.35467	0.0185393	0.092892
PA14_13370	5748.63	0.00891236	0.0419952	0.212223	0.831933	0.934803
PA14_13380	43.644	0.323105	0.276762	1.16744	0.243031	0.541474
PA14_13390	801.088	-0.0647054	0.0833233	-0.776558	0.43742	0.727585
PA14_13410	1128.59	-0.0148792	0.0578321	-0.257283	0.79696	0.921511
PA14_13420	2048.24	-0.115479	0.0568597	-2.03094	0.0422614	0.176383
PA14_13430	1544.43	0.472397	0.0647807	7.29225	3.04811e-13	5.01882e-12
PA14_13450	2060.45	0.126716	0.06291	2.01424	0.0439839	0.181352
PA14_13460	141.608	-0.24469	0.14107	-1.73453	0.0828238	0.280545
PA14_13470	3876.19	0.0583518	0.049283	1.18402	0.236407	0.533179
PA14_13490	2615.97	0.387016	0.26353	1.46859	0.141945	0.393318
PA14_13500	4533.26	0.00990498	0.0438357	0.225957	0.821235	0.931245
PA14_13510	2532.99	0.000207406	0.0518903	0.00399701	0.996811	0.998739
PA14_13520	1972.41	0.0242838	0.0632482	0.383944	0.70102	0.878897
PA14_13530	2894.93	0.0491392	0.0416438	1.17999	0.238005	0.535562
PA14_13560	2104.22	0.0951979	0.0478685	1.98874	0.0467301	0.189481
PA14_13580	4363.46	-0.0493996	0.0485165	-1.0182	0.308583	0.617472
PA14_13590	2380.9	-0.0340487	0.0486166	-0.700351	0.483708	0.754588
PA14_13600	834.754	-0.0623739	0.0650221	-0.959272	0.337422	0.648999
PA14_13610	1517.48	-0.91867	0.0543262	-16.9103	3.78091e-64	2.03206e-62
PA14_13620	550.251	0.0115587	0.0842001	0.137277	0.890812	0.960075
PA14_13630	760.695	0.292961	0.0807704	3.62708	0.00028664	0.00226176
PA14_13650	590.588	0.0176887	0.0735785	0.240405	0.810016	0.926752
PA14_13660	57.7964	-0.0441995	0.289743	-0.152547	0.878755	0.954283
PA14_13670	258.98	0.0856212	0.108146	0.791718	0.428525	0.721826
PA14_13680	848.611	0.117705	0.0713919	1.64872	0.0992045	0.314332
PA14_13690	2459.01	0.0217959	0.0628946	0.346546	0.728932	0.891334
PA14_13710	2461.03	-0.0449557	0.0516771	-0.869934	0.384336	0.686947
PA14_13720	1320.86	0.0107038	0.0578337	0.185079	0.853167	0.94237
PA14_13730	5.23916	-0.62878	0.883635	-0.711583	0.476723	0.751059
PA14_13740	5797.98	-0.0278607	0.0459987	-0.605685	0.544724	0.795887
PA14_13750	2.4428	0.590567	1.21239	0.487109	0.626181	0.842527
PA14_13770	3480.83	0.0475939	0.0546602	0.870722	0.383906	0.686947
PA14_13780	800.885	-0.0291244	0.0723869	-0.402343	0.687432	0.872186
PA14_13800	465.546	0.0486341	0.0908519	0.535312	0.592434	0.822793
PA14_13810	832.331	0.0307512	0.0632983	0.485815	0.627098	0.842527
PA14_13830	349.776	-0.13309	0.101593	-1.31003	0.190184	0.470669
PA14_13840	6767.22	0.00121505	0.0377737	0.0321665	0.974339	0.991561
PA14_13850	887.456	0.152021	0.0737695	2.06076	0.0393262	0.168073
PA14_13860	920.74	0.0707384	0.0620446	1.14012	0.254235	0.55345
PA14_13870	6065.41	-0.00158402	0.0416821	-0.0380025	0.969686	0.99055
PA14_13880	1386.04	0.087895	0.0704159	1.24823	0.211948	0.500193
PA14_13890	2765.9	0.0872217	0.0674394	1.29333	0.195895	0.477338
PA14_13900	3421.57	0.0224419	0.0442554	0.507099	0.612085	0.834576
PA14_13910	4358.72	0.050784	0.061915	0.820222	0.41209	0.708754
PA14_13920	1910.05	0.0162616	0.0466655	0.348472	0.727486	0.890617
PA14_13940	5410.25	0.0144163	0.0453768	0.317702	0.750711	0.903474
PA14_13950	2599	-0.0150244	0.052891	-0.284064	0.776361	0.915428
PA14_13960	1820.39	0.118659	0.0621346	1.90971	0.056171	0.215045
PA14_13970	8525.17	0.0796591	0.0421762	1.88872	0.0589293	0.222478
PA14_13990	1972.61	0.100495	0.0632126	1.58979	0.111883	0.33922
PA14_14000	7570.94	-0.04584	0.0394333	-1.16247	0.245045	0.54399
PA14_14010	1571.16	-0.0421682	0.0558631	-0.754849	0.450339	0.736195
PA14_14020	667.169	-0.563864	0.0814185	-6.92551	4.34419e-12	6.78051e-11
PA14_14040	2900.7	-0.0777509	0.0466947	-1.66509	0.0958944	0.307261
PA14_14060	3496.52	0.160274	0.082172	1.95046	0.0511208	0.200991
PA14_14080	2174.42	0.23253	0.0603747	3.85144	0.000117425	0.000998464
PA14_14100	941.703	-0.0141721	0.0809286	-0.175119	0.860986	0.945065
PA14_14130	2444.48	-0.0889964	0.0530527	-1.67751	0.0934432	0.301158
PA14_14140	86.6287	0.27763	0.216152	1.28442	0.198995	0.481401
PA14_14150	2001.02	0.122723	0.0611281	2.00764	0.0446812	0.183261
PA14_14160	1636.57	0.0639701	0.0575613	1.11134	0.266423	0.568044
PA14_14170	948.22	0.121119	0.0713061	1.69859	0.0893974	0.293036
PA14_14210	418.182	0.0718469	0.102508	0.700889	0.483372	0.754458
PA14_14220	1023.62	0.133103	0.0679215	1.95966	0.0500361	0.198231
PA14_14230	179.591	-0.276089	0.146223	-1.88814	0.0590077	0.222627
PA14_14250	625.795	-0.0460262	0.0790521	-0.582227	0.560414	0.801979
PA14_14270	1313.46	-0.100976	0.0817582	-1.23506	0.216808	0.506627
PA14_14280	135.339	-0.0505853	0.148952	-0.339608	0.734152	0.893571
PA14_14290	2050.28	-0.0263727	0.0505013	-0.522218	0.601519	0.827742
PA14_14300	4746.4	0.0165987	0.0462133	0.359175	0.719464	0.888509
PA14_14310	2217.06	-0.0105734	0.0824048	-0.12831	0.897904	0.962131
PA14_14320	101.245	0.0126439	0.207073	0.0610599	0.951311	0.982033
PA14_14330	216.679	-0.132578	0.162272	-0.817013	0.413921	0.709846
PA14_14340	3949.17	0.00391889	0.0452927	0.0865236	0.93105	0.972438
PA14_14360	710.507	0.146955	0.0739112	1.98826	0.0467825	0.189559
PA14_14370	2488.8	-0.0836176	0.0562022	-1.4878	0.136804	0.385497
PA14_14380	2918.18	-0.0367272	0.0433454	-0.847316	0.396819	0.698507
PA14_14390	390.027	2.15516e-05	0.103336	0.000208558	0.999834	0.9999
PA14_14420	1692.87	0.0580432	0.0619077	0.937576	0.348463	0.657315
PA14_14430	874.51	0.112612	0.119412	0.943053	0.345654	0.655848
PA14_14440	916.346	0.457508	0.0806273	5.67436	1.39211e-08	1.7585e-07
PA14_14450	3258.62	0.0790877	0.0490242	1.61324	0.106693	0.329133
PA14_14460	1942.68	0.0358382	0.0529417	0.676937	0.498446	0.763681
PA14_14470	2959.47	-0.0321693	0.044854	-0.717201	0.47325	0.749805
PA14_14480	4836.99	0.0156629	0.040624	0.385558	0.699824	0.878204
PA14_14490	2364.77	-0.0103749	0.0565545	-0.18345	0.854445	0.942786
PA14_14500	7.47349	-4.13958	1.02511	-4.03818	5.38681e-05	0.000482526
PA14_14510	1444.28	-0.189212	0.0589167	-3.21152	0.00132033	0.00926343
PA14_14520	981.265	-0.181682	0.0699597	-2.59695	0.00940556	0.0530005
PA14_14530	2959.66	-0.0365155	0.0566388	-0.644708	0.519116	0.77888
PA14_14540	3528.32	0.000348341	0.0506281	0.00688039	0.99451	0.998366
PA14_14550	947.043	0.367779	0.0769266	4.78091	1.74507e-06	1.86873e-05
PA14_14560	1695.76	0.130569	0.0526914	2.47799	0.0132126	0.0694072
PA14_14570	1784.94	-0.323718	0.059096	-5.47783	4.30584e-08	5.24154e-07
PA14_14590	448.823	0.044068	0.0838011	0.525865	0.598982	0.826134
PA14_14600	628.237	-0.151086	0.0752138	-2.00876	0.0445627	0.182906
PA14_14610	352.693	-0.877951	0.0963894	-9.10838	8.36217e-20	1.79771e-18
PA14_14630	3876.14	-1.53048	0.05548	-27.5862	1.6283e-167	2.81104e-165
PA14_14650	1966.88	0.0443464	0.0536674	0.826319	0.408623	0.708393
PA14_14660	2187.63	0.00173402	0.0510693	0.0339542	0.972914	0.991475
PA14_14680	367.214	-0.805103	0.10738	-7.49767	6.49611e-14	1.11471e-12
PA14_14690	1894.49	0.107671	0.0569418	1.8909	0.0586378	0.221819
PA14_14700	1031.17	-0.0211244	0.0603889	-0.349806	0.726484	0.890252
PA14_14710	746.395	-1.1795	0.0775618	-15.2073	3.16471e-52	1.45398e-50
PA14_14730	130.495	-3.30602	0.199381	-16.5814	9.50504e-62	4.92275e-60
PA14_14740	1.81985	-1.9729	1.62192	-1.2164	0.223834	0.517216
PA14_14750	893.385	-0.219587	0.0727668	-3.01768	0.00254714	0.0167442
PA14_14770	2312.96	0.0270617	0.0881963	0.306835	0.758969	0.907462
PA14_14780	457.578	-0.554018	0.112706	-4.91558	8.85198e-07	9.6424e-06
PA14_14800	1922	-0.0260241	0.058572	-0.44431	0.656818	0.856976
PA14_14810	4341.32	0.0128408	0.0517316	0.248219	0.803965	0.923436
PA14_14820	31.0423	-2.32997	0.361422	-6.44667	1.14337e-10	1.65324e-09
PA14_14830	1278	-0.152002	0.0756621	-2.00895	0.044542	0.182906
PA14_14850	616.037	-0.822739	0.264283	-3.1131	0.00185136	0.0125711
PA14_14860	9.58418	-3.15278	0.70308	-4.48424	7.31738e-06	7.28795e-05
PA14_14880	604.808	-1.00504	0.0827825	-12.1407	6.42614e-34	2.04524e-32
PA14_14890	3207.44	0.0395884	0.0419505	0.943694	0.345326	0.655556
PA14_14930	333.6	0.536044	0.107803	4.97242	6.61214e-07	7.24411e-06
PA14_14940	228.494	0.245424	0.125034	1.96287	0.0496616	0.197571
PA14_14960	2564.96	-0.0526241	0.0460861	-1.14186	0.25351	0.552928
PA14_14975	3070.33	-0.163341	0.0640146	-2.55162	0.0107224	0.0590769
PA14_14990	4146.94	-0.077842	0.168516	-0.461927	0.644133	0.849451
PA14_15000	1877.01	0.159109	0.0819001	1.94272	0.0520502	0.203337
PA14_15020	3975.37	0.0719727	0.0810513	0.88799	0.374546	0.678255
PA14_15030	3988.31	-0.0187158	0.0492255	-0.380206	0.703792	0.87954
PA14_15050	519.848	-0.171926	0.128927	-1.33352	0.182361	0.459696
PA14_15070	521.506	0.215161	0.0823564	2.61256	0.00898673	0.0510443
PA14_15080	2039.59	-0.00820255	0.0470099	-0.174486	0.861484	0.945065
PA14_15090	991.189	-0.740067	0.0973535	-7.60185	2.91925e-14	5.1649e-13
PA14_15100	2997.87	-0.0508098	0.0525777	-0.966375	0.333856	0.646053
PA14_15110	589.82	0.00337399	0.0963491	0.0350184	0.972065	0.991381
PA14_15120	460.753	0.234208	0.111034	2.10933	0.0349165	0.152663
PA14_15130	183.498	-0.0260287	0.145631	-0.17873	0.85815	0.944711
PA14_15140	842.999	-0.0606658	0.0878472	-0.690583	0.489828	0.75954
PA14_15150	3657.53	-0.000307589	0.0469207	-0.0065555	0.99477	0.99845
PA14_15160	322.445	-0.0929972	0.124206	-0.748734	0.454017	0.739087
PA14_15180	112.46	-0.301485	0.164014	-1.83817	0.0660374	0.240547
PA14_15190	0.988204	1.61052	1.79357	0.897941	0.369217	0.672882
PA14_15200	1373.09	0.0558358	0.0537209	1.03937	0.298634	0.604867
PA14_15210	8974.17	0.395048	0.258439	1.52859	0.126365	0.366735
PA14_15230	519.133	0.124326	0.101395	1.22615	0.220143	0.512948
PA14_15240	2004.42	0.0205558	0.0481397	0.427003	0.669378	0.86349
PA14_15250	22178.6	-0.03383	0.0356231	-0.949666	0.342282	0.65326
PA14_15260	240.937	0.135651	0.12375	1.09617	0.273005	0.576682
PA14_15270	871.259	-0.0277143	0.0660506	-0.419591	0.674784	0.865431
PA14_15280	4504.59	0.0127146	0.0541808	0.23467	0.814465	0.928749
PA14_15290	342.989	0.0835872	0.138556	0.603276	0.546325	0.796084
PA14_15310	93.6603	-2.53543	0.247769	-10.233	1.41034e-24	3.47822e-23
PA14_15340	199.31	-1.23008	0.140712	-8.74184	2.29343e-18	4.69988e-17
PA14_15350	130.206	0.160258	0.164682	0.973138	0.330485	0.643023
PA14_15360	1474.96	0.0994601	0.0531362	1.8718	0.0612347	0.228301
PA14_15370	3480.62	0.0262776	0.0504035	0.521345	0.602126	0.828178
PA14_15380	2927.4	0.282862	0.0502694	5.62693	1.83443e-08	2.29183e-07
PA14_15400	3679.56	0.0490315	0.0469765	1.04375	0.296603	0.603247
PA14_15410	3897.22	-0.0439997	0.0408771	-1.07639	0.281753	0.587105
PA14_15420	139.586	-0.249054	0.144667	-1.72157	0.0851469	0.286015
PA14_15430	2181.39	-0.0558001	0.0770235	-0.724455	0.468786	0.749579
PA14_15435	543.445	-0.0876744	0.0755933	-1.15982	0.246123	0.545165
PA14_15445	4108.68	0.147959	0.0546795	2.70593	0.00681139	0.0402242
PA14_15450	5632.36	0.248133	0.0455945	5.44217	5.26347e-08	6.33953e-07
PA14_15460	8527.6	0.105278	0.0364705	2.88665	0.00389367	0.0243226
PA14_15470	105.187	-0.230524	0.157819	-1.46068	0.144102	0.397748
PA14_15475	959.745	0.154971	0.0871197	1.77883	0.0752675	0.262745
PA14_15480	192.903	-0.0712111	0.138897	-0.512692	0.608167	0.832747
PA14_15490	2131.23	0.214183	0.0546052	3.92238	8.76778e-05	0.000763762
PA14_15500	8716	0.0250404	0.0388216	0.645013	0.518919	0.77888
PA14_15510	469.868	0.659341	0.0873	7.55259	4.26681e-14	7.47939e-13
PA14_15520	2244.03	-0.0138549	0.0555296	-0.249504	0.802971	0.923144
PA14_15530	1914.42	-0.0054521	0.0568126	-0.0959663	0.923547	0.969812
PA14_15540	1538.29	-0.03699	0.0632507	-0.584815	0.558672	0.801146
PA14_15560	6429.28	0.118995	0.0607664	1.95823	0.050203	0.198512
PA14_15570	22402.4	0.0531467	0.0452708	1.17397	0.240406	0.538724
PA14_15580	662.31	-0.478274	0.0904456	-5.28797	1.23679e-07	1.4409e-06
PA14_15590	12697.8	0.114844	0.0333432	3.44431	0.000572524	0.00432582
PA14_15600	386.183	-3.23702	0.12571	-25.75	3.22672e-146	4.48356e-144
PA14_15610	8237.92	-0.0875018	0.0386717	-2.26268	0.0236553	0.113725
PA14_15620	5732.54	0.0416161	0.0580008	0.71751	0.47306	0.749805
PA14_15630	88.7289	-0.372185	0.18561	-2.0052	0.0449418	0.183784
PA14_15650	1665.17	0.150984	0.0566954	2.66307	0.00774317	0.044947
PA14_15660	992.239	-0.0363376	0.0725552	-0.500827	0.616493	0.836545
PA14_15670	1501.33	-0.608443	0.0689763	-8.82104	1.13399e-18	2.34069e-17
PA14_15680	936.804	-0.138534	0.0646872	-2.14159	0.0322264	0.143882
PA14_15700	2582.27	-0.091567	0.0454617	-2.01416	0.0439931	0.181352
PA14_15710	1183.5	-0.00101417	0.0650794	-0.0155835	0.987567	0.995842
PA14_15720	866.783	0.048064	0.0674041	0.713073	0.475801	0.751059
PA14_15750	372.606	0.0556422	0.1086	0.51236	0.608399	0.832784
PA14_15770	1061.12	0.0881502	0.071248	1.23723	0.216001	0.506055
PA14_15780	1480.92	-0.0235555	0.0553442	-0.425619	0.670386	0.86349
PA14_15790	37.5168	-0.0557609	0.270388	-0.206225	0.836615	0.936891
PA14_15810	4080.77	-0.0902447	0.0678028	-1.33099	0.183193	0.460877
PA14_15820	64.4261	0.287566	0.263167	1.09272	0.274519	0.578591
PA14_15830	3742.53	0.139262	0.0456562	3.05022	0.00228672	0.0152546
PA14_15840	792.538	-0.00555788	0.0759408	-0.073187	0.941657	0.979303
PA14_15850	70.9541	0.237917	0.267461	0.889539	0.373713	0.677608
PA14_15860	1462.59	0.104521	0.0584568	1.788	0.0737758	0.259125
PA14_15870	557.08	-0.0888253	0.0972293	-0.913566	0.360945	0.664395
PA14_15880	126.807	-0.743428	0.182575	-4.07189	4.66324e-05	0.000423708
PA14_15890	768.761	-1.50604	0.0803912	-18.7339	2.61908e-78	1.73499e-76
PA14_15910	5238.85	-0.0348742	0.0371109	-0.939731	0.347355	0.656832
PA14_15920	2060.93	0.095499	0.056075	1.70306	0.0885571	0.291793
PA14_15930	559.765	-0.0749125	0.0827701	-0.905067	0.36543	0.668546
PA14_15960	222.261	-1.70971	0.141993	-12.0408	2.16897e-33	6.86478e-32
PA14_15970	413.291	0.00193339	0.0885934	0.0218232	0.982589	0.994226
PA14_15980	789.605	-3.1978	0.213172	-15.001	7.23158e-51	3.24396e-49
PA14_15990	694.997	0.57973	0.106172	5.46027	4.75403e-08	5.73808e-07
PA14_16000	449.342	-1.11851	0.0938715	-11.9153	9.84882e-33	3.04939e-31
PA14_16010	10090.6	0.224335	0.0391678	5.72755	1.01891e-08	1.29859e-07
PA14_16020	83.1861	0.0521592	0.188064	0.277348	0.781513	0.917052
PA14_16030	52.7984	0.337099	0.248306	1.35759	0.174593	0.448958
PA14_16040	1334.31	-0.373341	0.0641293	-5.82168	5.82584e-09	7.52604e-08
PA14_16050	593.405	0.170014	0.0982812	1.72987	0.0836529	0.282443
PA14_16070	4320.49	0.0269286	0.0489749	0.549846	0.582425	0.816858
PA14_16090	882.36	-0.032733	0.0769337	-0.42547	0.670494	0.86349
PA14_16100	2096.93	0.15487	0.0510965	3.03094	0.00243795	0.0161688
PA14_16110	9035.61	0.0225615	0.0345487	0.653035	0.513733	0.775625
PA14_16130	1566.43	-0.081731	0.0625234	-1.30721	0.191143	0.472015
PA14_16140	922.282	-0.155606	0.0773892	-2.0107	0.0443572	0.182326
PA14_16150	6776.44	-0.00984155	0.0536931	-0.183293	0.854568	0.942786
PA14_16160	377.661	-0.161586	0.103806	-1.55662	0.119561	0.354629
PA14_16180	1052.44	0.0424199	0.0838369	0.505981	0.61287	0.834576
PA14_16190	1608.59	0.0487337	0.0657685	0.740988	0.458701	0.74197
PA14_16200	2499.27	0.707641	0.0495146	14.2916	2.46996e-46	1.0051e-44
PA14_16210	2134.15	0.0625688	0.0720869	0.867963	0.385415	0.687447
PA14_16220	288.148	0.0240377	0.116769	0.205856	0.836903	0.936891
PA14_16250	2020.2	-0.0413089	0.0566443	-0.729268	0.465838	0.747379
PA14_16260	731.235	-0.0167943	0.128246	-0.130954	0.895812	0.961583
PA14_16270	405.514	-0.077083	0.0837256	-0.920662	0.357227	0.663086
PA14_16280	279.455	0.351635	0.125712	2.79716	0.00515547	0.0315814
PA14_16290	6575.08	-0.00126203	0.0454096	-0.0277922	0.977828	0.99214
PA14_16300	2621.21	0.112085	0.0568227	1.97254	0.0485484	0.194775
PA14_16310	1464.69	0.0866368	0.0660028	1.31262	0.18931	0.469285
PA14_16320	1887.43	-0.106169	0.0608262	-1.74545	0.0809062	0.276664
PA14_16330	3573.35	0.0121613	0.0507788	0.239497	0.81072	0.926756
PA14_16350	992.136	0.0222227	0.0614459	0.361664	0.717603	0.887289
PA14_16360	2873.67	-0.0869013	0.0529929	-1.63987	0.101033	0.317769
PA14_16370	2210.11	-0.0389844	0.0514482	-0.75774	0.448607	0.73566
PA14_16380	1680.5	0.028862	0.0582864	0.495177	0.620475	0.839207
PA14_16390	958.464	2.49024e-05	0.0706927	0.000352263	0.999719	0.9999
PA14_16410	1266.41	0.00737505	0.0566874	0.1301	0.896487	0.961643
PA14_16430	2454.39	0.0453013	0.0482011	0.939839	0.3473	0.656832
PA14_16440	356.433	0.344566	0.128341	2.68478	0.00725776	0.0427258
PA14_16450	2895	0.0344992	0.0531738	0.648801	0.516467	0.777361
PA14_16460	65.6142	-0.319235	0.232816	-1.37119	0.170315	0.443072
PA14_16470	2738.7	0.0129845	0.367691	0.0353137	0.97183	0.991318
PA14_16480	6363.62	0.102129	0.0452424	2.25736	0.0239855	0.114925
PA14_16500	2096.41	0.0845924	0.0622164	1.35965	0.173941	0.44853
PA14_16510	1329.49	-0.54001	0.0828866	-6.51505	7.26644e-11	1.06969e-09
PA14_16530	65.1156	-2.31368	0.239463	-9.66194	4.37516e-22	1.00102e-20
PA14_16550	2420.12	0.0254858	0.0599683	0.424988	0.670845	0.86349
PA14_16560	7032.11	0.0263402	0.0445182	0.591672	0.55407	0.800745
PA14_16580	4443.77	0.0477571	0.0397198	1.20235	0.229227	0.524255
PA14_16590	341.748	-0.136074	0.101714	-1.33781	0.180959	0.457659
PA14_16600	798.437	0.0396684	0.0779716	0.508754	0.610925	0.833837
PA14_16610	1566.71	0.0371819	0.0661197	0.562342	0.573883	0.812134
PA14_16620	5302.04	0.242626	0.0427559	5.67467	1.38959e-08	1.7585e-07
PA14_16630	3158.53	-0.0414788	0.0427511	-0.97024	0.331927	0.644509
PA14_16640	119.467	0.170422	0.161938	1.05239	0.292622	0.599449
PA14_16660	1932.62	0.0361944	0.0505591	0.715884	0.474063	0.749805
PA14_16670	2329.39	-0.0204861	0.0452176	-0.453057	0.650508	0.853582
PA14_16680	3250.19	0.0180275	0.0603211	0.298859	0.765048	0.909152
PA14_16690	3750.04	0.0499493	0.0711786	0.701746	0.482838	0.754094
PA14_16700	15.9957	-0.988007	0.48896	-2.02063	0.0433181	0.179348
PA14_16710	533.041	-0.835234	0.0962356	-8.67906	3.99055e-18	8.09046e-17
PA14_16720	2298.38	0.0511143	0.0540087	0.946409	0.34394	0.655206
PA14_16730	38.5468	0.223758	0.277909	0.805146	0.420735	0.716734
PA14_16740	527.252	0.0333531	0.0912154	0.365652	0.714625	0.885671
PA14_16750	431.718	-0.830164	0.113323	-7.32565	2.3774e-13	3.92582e-12
PA14_16770	79.2427	-0.0534036	0.195308	-0.273433	0.784521	0.917733
PA14_16780	6494.71	0.0463846	0.0366748	1.26476	0.205959	0.492435
PA14_16790	34176.6	0.108302	0.0624399	1.7345	0.0828289	0.280545
PA14_16800	1179.31	-0.590495	0.0749702	-7.87639	3.36973e-15	6.19269e-14
PA14_16820	2449.08	0.182863	0.0619434	2.95209	0.00315631	0.0201867
PA14_16830	4966.35	0.0233122	0.0431183	0.540656	0.588745	0.821676
PA14_16840	221.192	0.0672102	0.140601	0.478021	0.632635	0.844651
PA14_16860	1623.55	0.0650406	0.0594326	1.09436	0.273798	0.577927
PA14_16870	460.154	-0.275585	0.0957601	-2.87787	0.00400369	0.0249552
PA14_16880	2859.66	0.119259	0.0505647	2.35853	0.0183472	0.0920919
PA14_16890	5732.32	-0.0506112	0.0444681	-1.13815	0.25506	0.553974
PA14_16910	1785.7	0.0137648	0.0708349	0.194323	0.845923	0.939697
PA14_16930	490.938	0.0650705	0.086698	0.750542	0.452928	0.738186
PA14_16950	3466.7	0.0356767	0.0444657	0.802341	0.422356	0.717894
PA14_16960	32.8345	-0.54411	0.329909	-1.64927	0.099092	0.314325
PA14_16970	4211.09	0.105447	0.0518663	2.03305	0.0420475	0.175826
PA14_16980	969.295	-0.0394271	0.0834395	-0.472523	0.636553	0.845505
PA14_16990	2738.2	0.0395649	0.0511058	0.774176	0.438827	0.728576
PA14_17000	3482.57	0.182064	0.0458819	3.96809	7.24518e-05	0.000635991
PA14_17010	1892.15	0.0877055	0.0655594	1.3378	0.180961	0.457659
PA14_17030	429.803	-0.0915673	0.0904713	-1.01211	0.311483	0.620896
PA14_17040	1017.02	0.107079	0.0783989	1.36582	0.171996	0.445703
PA14_17050	1974.14	-0.194514	0.0601256	-3.23513	0.00121587	0.00862614
PA14_17060	857.424	-1.00805	0.0855943	-11.7771	5.12389e-32	1.54449e-30
PA14_17100	424.33	0.0731475	0.109294	0.669271	0.503322	0.766692
PA14_17110	342.793	-3.22344	0.133361	-24.1707	4.52052e-129	5.59857e-127
PA14_17120	1268.93	0.0881846	0.056329	1.56553	0.117459	0.350389
PA14_17130	5604.17	-0.169755	0.0653656	-2.59702	0.00940375	0.0530005
PA14_17140	763.253	0.268643	0.0809384	3.3191	0.000903086	0.00661295
PA14_17150	40.5249	-2.31394	0.304176	-7.60723	2.80036e-14	4.96998e-13
PA14_17170	691.212	-1.95649	0.0817005	-23.9471	9.90784e-127	1.20096e-124
PA14_17180	431.789	-0.0859698	0.114882	-0.748329	0.454262	0.739087
PA14_17190	2086.39	-0.317434	0.0565668	-5.61167	2.00388e-08	2.49805e-07
PA14_17210	1974.46	-2.79364	0.0914293	-30.5552	4.82715e-205	1.19566e-202
PA14_17230	3709.3	0.00829661	0.0539433	0.153802	0.877766	0.954147
PA14_17250	10.7892	-0.111544	0.63936	-0.174462	0.861502	0.945065
PA14_17260	471.212	-0.136154	0.0891587	-1.5271	0.126737	0.367254
PA14_17270	52.3281	-2.49135	0.27726	-8.98561	2.57293e-19	5.42887e-18
PA14_17280	3825.67	-0.316299	0.0431361	-7.33259	2.25752e-13	3.73868e-12
PA14_17290	268.416	-0.501499	0.151181	-3.31721	0.000909226	0.00664937
PA14_17320	2806.23	-1.29215	0.0554868	-23.2876	5.91958e-120	6.61252e-118
PA14_17330	1034.44	-0.359509	0.0765656	-4.69544	2.66037e-06	2.79634e-05
PA14_17340	5369.79	-0.26088	0.042331	-6.16286	7.1443e-10	9.92709e-09
PA14_17350	1135.73	0.0434457	0.0729251	0.595758	0.551337	0.799024
PA14_17370	122.763	-0.0429297	0.16933	-0.253526	0.799862	0.922281
PA14_17380	1394.97	0.0819853	0.0592552	1.3836	0.166482	0.436669
PA14_17400	501.833	-0.0664711	0.10243	-0.648943	0.516375	0.777361
PA14_17410	4163.22	0.0164496	0.0472584	0.348077	0.727782	0.890693
PA14_17420	1280.55	-0.147033	0.060194	-2.44265	0.01458	0.0751169
PA14_17440	4473.18	-0.0711825	0.0628663	-1.13228	0.257516	0.556128
PA14_17450	5671.5	-0.0885374	0.0490884	-1.80363	0.0712888	0.253434
PA14_17460	960.366	-0.0835191	0.0943623	-0.88509	0.376108	0.679396
PA14_17470	4793.1	0.000118752	0.051204	0.00231919	0.99815	0.999553
PA14_17480	1592.04	-0.0951064	0.0725796	-1.31037	0.190069	0.470589
PA14_17490	472.491	-0.999551	0.0936948	-10.6682	1.43437e-26	3.71436e-25
PA14_17500	4673.89	0.0110511	0.0424465	0.260353	0.794592	0.920337
PA14_17510	633.883	0.0438497	0.0815107	0.537963	0.590603	0.821773
PA14_17520	754.101	0.044593	0.0736673	0.60533	0.54496	0.795887
PA14_17530	1338.16	0.399671	0.0579494	6.89689	5.31517e-12	8.25082e-11
PA14_17540	1641.55	0.0878705	0.0716784	1.2259	0.220236	0.512954
PA14_17550	1589.42	0.163486	0.0827531	1.97559	0.0482015	0.193792
PA14_17570	149.925	0.220312	0.215741	1.02119	0.307166	0.616387
PA14_17580	694.449	0.134342	0.0775845	1.73156	0.0833523	0.281648
PA14_17590	1163.52	-0.144525	0.0660777	-2.1872	0.0287282	0.131669
PA14_17600	374.88	-0.173425	0.088182	-1.96667	0.049221	0.196642
PA14_17610	6674.92	0.134866	0.057698	2.33744	0.0194162	0.0965217
PA14_17620	227.306	0.196257	0.133866	1.46607	0.142629	0.394515
PA14_17630	2152.99	0.0318127	0.0484574	0.65651	0.511496	0.774175
PA14_17640	11.3083	0.697123	0.646427	1.07843	0.280844	0.586216
PA14_17650	541.348	-0.050125	0.0857206	-0.584748	0.558717	0.801146
PA14_17660	4476.98	-0.0561724	0.044439	-1.26403	0.206218	0.492796
PA14_17670	283.413	-0.162688	0.108477	-1.49974	0.133682	0.380224
PA14_17690	116.942	-0.121016	0.173798	-0.696302	0.48624	0.75624
PA14_17700	1196.57	-0.0499451	0.0671979	-0.743254	0.457328	0.740565
PA14_17710	1505.93	0.0828849	0.0586921	1.4122	0.157892	0.422304
PA14_17720	2107.28	0.0406565	0.049738	0.817414	0.413692	0.709846
PA14_17730	2499.56	0.111596	0.057505	1.94063	0.0523031	0.203671
PA14_17740	3518.29	0.0842647	0.0512416	1.64446	0.100081	0.31623
PA14_17760	1753.76	-0.0640769	0.0493808	-1.29761	0.194423	0.47563
PA14_17780	5711.18	0.00323314	0.041157	0.0785563	0.937386	0.976368
PA14_17790	1842.58	-0.0937703	0.0544343	-1.72263	0.0849554	0.28554
PA14_17810	1767.72	0.111597	0.0547551	2.03812	0.0415382	0.17476
PA14_17820	10424.5	0.110202	0.0605968	1.81862	0.0689698	0.247914
PA14_17850	1137.43	-0.046096	0.0731221	-0.630398	0.528434	0.785209
PA14_17860	812.43	0.130564	0.0726619	1.79687	0.072356	0.256191
PA14_17880	1563.76	-0.0313781	0.0620676	-0.505548	0.613174	0.834576
PA14_17890	631.692	-0.0702288	0.0818792	-0.857713	0.391051	0.692945
PA14_17900	2964.1	0.090183	0.0449501	2.00629	0.0448252	0.183455
PA14_17910	95.3284	0.303997	0.195648	1.55379	0.120234	0.355645
PA14_17920	448.178	-0.110805	0.0873598	-1.26837	0.204664	0.490729
PA14_17930	793.394	-0.860431	0.083544	-10.2991	7.11006e-25	1.78441e-23
PA14_17940	3502.37	-0.893732	0.0506456	-17.6468	1.07734e-69	6.59955e-68
PA14_17960	6670.31	-0.102422	0.129399	-0.791518	0.428642	0.721826
PA14_17990	5178.11	-0.0767723	0.0397759	-1.93012	0.0535921	0.207697
PA14_18010	63.5762	0.170046	0.216794	0.784363	0.432827	0.723351
PA14_18020	1125.15	0.11735	0.0804479	1.4587	0.144647	0.398672
PA14_18040	1946.45	0.295127	0.216698	1.36193	0.173221	0.447748
PA14_18050	4077.45	-0.0435567	0.0420185	-1.03661	0.299919	0.606761
PA14_18060	898.654	-0.0836708	0.0624968	-1.3388	0.180635	0.457659
PA14_18070	3323.11	-0.043579	0.0468021	-0.931132	0.351785	0.659286
PA14_18080	689.701	0.0272191	0.0805229	0.33803	0.735341	0.894613
PA14_18090	826.743	-0.0482249	0.0685025	-0.703987	0.481441	0.754094
PA14_18100	274.047	-0.022635	0.116077	-0.195	0.845393	0.939564
PA14_18110	801.593	0.118595	0.0659136	1.79925	0.0719797	0.255176
PA14_18120	1162.92	-1.72713	0.0700251	-24.6644	2.57813e-134	3.41572e-132
PA14_18140	2469.39	-0.0428697	0.0519416	-0.825343	0.409177	0.708393
PA14_18150	4800.59	0.064421	0.0478326	1.3468	0.178044	0.453363
PA14_18160	819.97	-0.293747	0.0672612	-4.36726	1.25816e-05	0.000121281
PA14_18180	555.701	0.18524	0.0858005	2.15896	0.0308532	0.13943
PA14_18200	52.3782	-0.0384097	0.239859	-0.160135	0.872775	0.951381
PA14_18210	2541.17	0.118165	0.0694694	1.70096	0.0889497	0.292616
PA14_18230	283.111	-0.105048	0.133334	-0.787858	0.43078	0.722619
PA14_18250	1864.82	0.1358	0.0600981	2.25963	0.023844	0.114439
PA14_18260	26.1108	-0.450335	0.320468	-1.40524	0.15995	0.426623
PA14_18275	7100.53	0.0792165	0.0400674	1.97708	0.0480327	0.193387
PA14_18300	108.507	0.0536187	0.18082	0.29653	0.766825	0.910456
PA14_18310	5356.47	0.124871	0.0557218	2.24098	0.0250276	0.118531
PA14_18320	37.414	0.181799	0.310782	0.584972	0.558567	0.801146
PA14_18330	479.94	0.161893	0.107281	1.50905	0.131287	0.376038
PA14_18340	1136.76	-0.0979997	0.0717945	-1.365	0.172252	0.446055
PA14_18350	388.656	-0.132978	0.0893989	-1.48747	0.13689	0.385497
PA14_18360	1020.89	-0.0283744	0.0675607	-0.419984	0.674497	0.865406
PA14_18370	406.559	0.166629	0.0996026	1.67294	0.0943385	0.303814
PA14_18380	946.441	0.020805	0.0821411	0.253284	0.800048	0.922281
PA14_18410	0.323105	0.0974418	3.23764	0.0300965	0.97599	0.99201
PA14_18450	313.576	-0.275549	0.103478	-2.66288	0.00774758	0.044947
PA14_18470	8655.8	0.119359	0.0345936	3.45032	0.000559925	0.00423624
PA14_18480	652.389	0.0998769	0.0780614	1.27947	0.200733	0.484497
PA14_18500	733.102	-0.0749711	0.0692529	-1.08257	0.279	0.583762
PA14_18510	0.248492	-1.36873	3.52994	-0.38775	0.698201	0.87717
PA14_18520	374.95	0.00810574	0.111934	0.0724151	0.942272	0.979405
PA14_18550	1271.45	-0.0737622	0.0669811	-1.10124	0.270792	0.573708
PA14_18565	168.135	0.114978	0.15387	0.74724	0.454919	0.739087
PA14_18580	7862.91	-0.0486622	0.0410053	-1.18673	0.235335	0.531939
PA14_18590	0.356314	-1.91231	3.10961	-0.614968	0.538576	0.792219
PA14_18600	4349.4	-0.202835	0.0460112	-4.40838	1.04145e-05	0.000101944
PA14_18610	6207.86	0.0649431	0.03825	1.69786	0.0895342	0.293147
PA14_18625	4443.89	0.0782344	0.0424033	1.84501	0.0650365	0.238253
PA14_18630	2107.79	0.041258	0.0566544	0.72824	0.466467	0.747738
PA14_18640	502.336	-2.00857	0.0912595	-22.0094	2.33855e-107	2.25809e-105
PA14_18650	1192.97	-0.288819	0.0677585	-4.26247	2.02177e-05	0.000192287
PA14_18660	1952.91	0.0400388	0.0610782	0.655534	0.512124	0.774508
PA14_18670	3875.09	-0.109351	0.0479308	-2.28143	0.0225231	0.109203
PA14_18680	1493.87	0.106109	0.0703403	1.5085	0.131426	0.376058
PA14_18690	930.136	0.0587158	0.0993433	0.59104	0.554494	0.800767
PA14_18700	2158.23	-0.00517734	0.0490303	-0.105595	0.915904	0.967892
PA14_18710	2656.05	-0.906372	0.0456266	-19.865	8.18029e-88	6.05235e-86
PA14_18720	1120.63	0.18656	0.0709064	2.63108	0.00851144	0.0488315
PA14_18740	2116.17	-0.05349	0.0626779	-0.853411	0.393431	0.695099
PA14_18750	1448.15	0.144677	0.0812747	1.7801	0.0750599	0.262508
PA14_18760	1775.99	0.0159421	0.0862615	0.184812	0.853377	0.94237
PA14_18780	2913.13	0.0573049	0.0423886	1.35189	0.17641	0.451688
PA14_18790	3948.82	0.00573	0.0446553	0.128316	0.897899	0.962131
PA14_18800	1458.57	0.130192	0.0933986	1.39394	0.163335	0.431336
PA14_18810	474.443	0.120207	0.0901927	1.33278	0.182605	0.460076
PA14_18820	531.497	0.0693978	0.0851778	0.814741	0.415221	0.710938
PA14_18830	7181.22	0.0990421	0.039171	2.52845	0.0114566	0.061668
PA14_18850	291.577	-0.0736145	0.116556	-0.631579	0.527662	0.784992
PA14_18860	6698.07	0.0113785	0.0375758	0.302815	0.762031	0.90803
PA14_18870	2897.15	0.0354034	0.0628759	0.563068	0.573389	0.811843
PA14_18880	1465.38	-0.146448	0.204047	-0.717718	0.472931	0.749805
PA14_18900	4225.82	0.0272085	0.0378537	0.71878	0.472276	0.749805
PA14_18920	38.2431	0.0149244	0.266806	0.0559372	0.955392	0.98371
PA14_18930	2132.44	-0.115421	0.0524784	-2.19941	0.0278488	0.128154
PA14_18950	530.705	-0.394839	0.107633	-3.66836	0.000244109	0.00195322
PA14_18960	268.181	0.0388205	0.126109	0.307833	0.75821	0.907462
PA14_18970	357.541	-0.00929347	0.1005	-0.0924721	0.926323	0.970977
PA14_18985	381.931	0.0499522	0.107916	0.46288	0.64345	0.848943
PA14_19010	288.024	0.00230345	0.129018	0.0178536	0.985756	0.995189
PA14_19020	2389.01	0.0655017	0.0504701	1.29783	0.194345	0.47563
PA14_19030	1143.09	-0.0428366	0.067784	-0.631957	0.527415	0.784992
PA14_19050	27.5887	-2.58924	0.38609	-6.70631	1.9961e-11	3.05694e-10
PA14_19090	1574.4	-0.294406	0.0694466	-4.23932	2.24203e-05	0.000211471
PA14_19100	1515.89	0.0140752	0.0711101	0.197935	0.843096	0.938647
PA14_19110	1305.51	-0.0311656	0.064683	-0.481821	0.629933	0.843489
PA14_19120	12184	0.199281	0.0442936	4.4991	6.82413e-06	6.83252e-05
PA14_19130	3111.58	0.349654	0.0737644	4.74014	2.1357e-06	2.26997e-05
PA14_19140	938.12	0.172506	0.0726668	2.37393	0.0175998	0.088731
PA14_19150	704.133	-0.0524899	0.079794	-0.657818	0.510655	0.773841
PA14_19160	1334.13	0.109262	0.068943	1.58482	0.113007	0.341177
PA14_19170	298.652	-0.00329458	0.115696	-0.0284763	0.977282	0.99214
PA14_19190	3202.72	0.0920997	0.0659358	1.39681	0.162471	0.42991
PA14_19205	534.279	0.034064	0.078989	0.43125	0.666287	0.861599
PA14_19210	152.834	0.0668119	0.142933	0.467436	0.640188	0.847307
PA14_19270	863.57	0.0886152	0.0819517	1.08131	0.279559	0.584673
PA14_19290	1137.72	0.756709	0.0813033	9.30723	1.31214e-20	2.88619e-19
PA14_19310	1869.78	0.0327633	0.0652783	0.501902	0.615736	0.836545
PA14_19320	1968.57	-0.0186519	0.0539986	-0.345414	0.729783	0.891647
PA14_19330	1407.41	-0.0711076	0.0781602	-0.909767	0.362945	0.666554
PA14_19340	2602.23	-0.0443824	0.0462557	-0.959501	0.337306	0.648999
PA14_19350	391.685	0.0321237	0.110368	0.29106	0.771005	0.912586
PA14_19360	1476.7	0.0970439	0.0596186	1.62775	0.103579	0.322536
PA14_19370	20997.6	-0.00622793	0.036068	-0.172672	0.862909	0.945565
PA14_19380	2951.38	0.0156751	0.0684993	0.228836	0.818996	0.929904
PA14_19390	920.409	-0.190428	0.0791819	-2.40495	0.0161749	0.0821285
PA14_19400	1040.55	0.0737987	0.0657135	1.12304	0.261422	0.56116
PA14_19410	1000.67	-0.00848407	0.0798614	-0.106235	0.915396	0.967845
PA14_19430	46.6811	-0.186957	0.261925	-0.71378	0.475363	0.750622
PA14_19450	1668.52	0.0410245	0.0579333	0.708134	0.478862	0.75195
PA14_19470	8195.25	0.067011	0.038288	1.75018	0.0800867	0.274852
PA14_19490	193.241	-0.152043	0.185267	-0.82067	0.411834	0.708754
PA14_19500	2396.92	0.100977	0.0567195	1.78028	0.0750305	0.262508
PA14_19510	121.022	0.0834671	0.184262	0.452981	0.650562	0.853582
PA14_19520	2664.25	0.0153972	0.0520339	0.295907	0.767301	0.91069
PA14_19530	1963.08	-0.506629	0.0553654	-9.15064	5.65994e-20	1.22603e-18
PA14_19540	2606.71	0.126573	0.0411719	3.07426	0.00211027	0.0141771
PA14_19560	1808.51	0.224305	0.0672444	3.33567	0.000850945	0.00627145
PA14_19570	1276.39	0.272436	0.105659	2.57844	0.00992471	0.0554868
PA14_19580	564.254	-0.0448307	0.0864867	-0.518354	0.604212	0.830101
PA14_19590	1885.67	0.017406	0.0590561	0.294736	0.768196	0.911183
PA14_19600	1051.59	0.0389751	0.0595829	0.654132	0.513027	0.775462
PA14_19610	1514.52	-0.0307279	0.0635713	-0.483361	0.62884	0.843307
PA14_19620	1240.44	0.141853	0.0631077	2.2478	0.024589	0.117225
PA14_19630	1685.24	0.0166926	0.0484205	0.344744	0.730287	0.891916
PA14_19640	424.154	0.174172	0.0893685	1.94892	0.0513054	0.201299
PA14_19650	1200.57	0.30888	0.0708073	4.36226	1.28727e-05	0.000123878
PA14_19660	68.61	0.448339	0.208976	2.1454	0.0319205	0.142828
PA14_19670	810.273	0.122954	0.0719302	1.70935	0.0873854	0.289439
PA14_19680	3189.55	-0.0385868	0.0514257	-0.75034	0.45305	0.738186
PA14_19690	1064.5	0.0332894	0.0609943	0.545779	0.585218	0.819564
PA14_19700	5.12132	0.218948	0.754133	0.290331	0.771563	0.912586
PA14_19710	433.401	-0.0677035	0.0948558	-0.713752	0.47538	0.750622
PA14_19720	1949.55	0.0315297	0.0578052	0.545448	0.585446	0.819682
PA14_19730	726.27	0.158952	0.0825031	1.92662	0.0540268	0.208813
PA14_19740	1006.25	-0.830525	0.0955177	-8.69499	3.46861e-18	7.05739e-17
PA14_19750	2198.81	-0.00309449	0.0595162	-0.051994	0.958533	0.98473
PA14_19770	678.477	0.128244	0.0938695	1.36619	0.171879	0.445703
PA14_19800	1495.39	0.0569294	0.0702836	0.809995	0.417943	0.713949
PA14_19810	2574.98	0.0454873	0.0477648	0.952318	0.340936	0.651563
PA14_19850	236.575	0.150785	0.119108	1.26595	0.205531	0.492024
PA14_19860	579.019	-0.0103636	0.0829399	-0.124953	0.900561	0.962569
PA14_19870	1070.31	0.00844338	0.0614514	0.137399	0.890715	0.960075
PA14_19900	1593.3	0.150699	0.0595884	2.529	0.0114388	0.0616581
PA14_19910	1296.42	0.116645	0.0783244	1.48926	0.13642	0.385316
PA14_19920	963.79	-0.467369	0.0788776	-5.92524	3.11846e-09	4.1316e-08
PA14_19940	4202.07	-0.0604273	0.0416566	-1.45061	0.146889	0.401741
PA14_19950	2379.63	-0.0298374	0.051554	-0.57876	0.562751	0.803709
PA14_19960	2710.71	0.60553	0.0563729	10.7415	6.49781e-27	1.7138e-25
PA14_19970	924.406	-0.0848057	0.0678409	-1.25007	0.211275	0.499433
PA14_19990	4853.79	0.255798	0.339974	0.752406	0.451807	0.73752
PA14_20000	1864.63	-0.110361	0.0654588	-1.68595	0.0918048	0.297957
PA14_20010	10109.8	-0.0485806	0.035993	-1.34972	0.177105	0.452232
PA14_20020	1985.35	0.264522	0.0603811	4.38087	1.18204e-05	0.000114875
PA14_20030	3903.4	0.00604358	0.0483353	0.125035	0.900496	0.962569
PA14_20040	2917.61	0.0247914	0.0484687	0.511493	0.609006	0.833415
PA14_20050	703.486	-0.00279584	0.0914537	-0.0305711	0.975612	0.991802
PA14_20060	2294.39	0.0484869	0.0605717	0.800489	0.423428	0.718793
PA14_20070	1647.72	-0.0454273	0.0556977	-0.815604	0.414726	0.710585
PA14_20080	361.09	-0.0108979	0.126887	-0.0858869	0.931556	0.972618
PA14_20100	1322.06	-0.146267	0.0688367	-2.12485	0.0335994	0.1485
PA14_20110	929.415	0.00205457	0.0793233	0.0259012	0.979336	0.99266
PA14_20120	999.304	0.021876	0.071502	0.30595	0.759643	0.907462
PA14_20130	681.329	0.18921	0.0954325	1.98266	0.0474051	0.191537
PA14_20140	291.546	-1.94471	0.113008	-17.2086	2.28796e-66	1.31661e-64
PA14_20150	915.199	0.0203886	0.0646254	0.315489	0.75239	0.904297
PA14_20170	671.906	-0.0229197	0.0799825	-0.286559	0.77445	0.914224
PA14_20180	1375.05	0.140329	0.0684033	2.0515	0.0402186	0.170354
PA14_20190	4062.07	0.165841	0.0432912	3.83082	0.000127719	0.00107636
PA14_20200	1374.68	-0.243741	0.180921	-1.34722	0.177909	0.453285
PA14_20230	729.141	0.0138747	0.0760798	0.182371	0.855292	0.943023
PA14_20250	1109.13	-0.0489887	0.0723825	-0.676803	0.498531	0.763681
PA14_20260	4942.41	-0.0824096	0.0524054	-1.57254	0.115825	0.347659
PA14_20270	2901.5	0.0913434	0.0473825	1.92779	0.0538816	0.208393
PA14_20280	447.013	0.0528258	0.107009	0.493658	0.621547	0.839686
PA14_20290	3630.54	0.17341	0.133721	1.29681	0.194698	0.475844
PA14_20300	3228.87	-0.100817	0.0594336	-1.69629	0.0898306	0.293443
PA14_20320	1986.85	-0.182403	0.0604282	-3.0185	0.0025403	0.0167307
PA14_20330	36.5267	-0.0459284	0.29774	-0.154257	0.877407	0.954147
PA14_20350	2541.46	0.00643561	0.0536395	0.119979	0.9045	0.964608
PA14_20360	519.167	-0.0967021	0.0884844	-1.09287	0.27445	0.578591
PA14_20380	2313.49	0.000924995	0.0579515	0.0159615	0.987265	0.995842
PA14_20390	1694.96	0.371562	0.154325	2.40766	0.0160549	0.0817382
PA14_20400	2709.13	-0.0625209	0.047956	-1.30371	0.192332	0.473688
PA14_20420	986.464	-0.0458914	0.0621665	-0.738201	0.460392	0.742609
PA14_20430	6158.54	0.223509	0.136453	1.63799	0.101424	0.318391
PA14_20440	3177.9	0.0779561	0.0455946	1.70977	0.087309	0.289439
PA14_20450	1126.51	-0.0179348	0.0632513	-0.283549	0.776756	0.915428
PA14_20460	1267.69	-0.0075469	0.0572729	-0.131771	0.895166	0.961583
PA14_20470	315.099	-0.00219199	0.105386	-0.0207995	0.983406	0.994226
PA14_20480	219.251	-0.0644591	0.13783	-0.46767	0.64002	0.847307
PA14_20491	504.114	0.048826	0.101008	0.483386	0.628822	0.843307
PA14_20500	2228.99	-0.111854	0.0457756	-2.44353	0.0145445	0.0750543
PA14_20510	2518.78	0.207843	0.0459719	4.52109	6.15233e-06	6.18163e-05
PA14_20520	7982.08	0.0390131	0.0365043	1.06873	0.285193	0.591032
PA14_20530	2120.98	0.0118831	0.0442589	0.26849	0.788322	0.918639
PA14_20550	1574.4	-0.0403713	0.0640684	-0.630129	0.52861	0.785265
PA14_20560	4019.75	0.0257693	0.050047	0.514902	0.606622	0.831751
PA14_20570	2197.39	0.0362153	0.0481082	0.752787	0.451578	0.737357
PA14_20580	11.528	0.904127	0.558756	1.61811	0.10564	0.327438
PA14_20590	1.64288	-1.32523	1.34217	-0.987375	0.323459	0.634117
PA14_20600	1086.75	-0.0130629	0.0671566	-0.194513	0.845774	0.939697
PA14_20610	70.9451	-0.176591	0.223772	-0.789159	0.430019	0.722619
PA14_20620	3587.66	0.121738	0.0599874	2.02939	0.042419	0.176782
PA14_20630	68.3727	-0.329442	0.217155	-1.51708	0.129246	0.372627
PA14_20640	404.527	0.0638944	0.0927296	0.68904	0.490798	0.759722
PA14_20650	97.2505	-0.219064	0.169823	-1.28995	0.197067	0.479084
PA14_20670	1686.69	-0.141733	0.0885051	-1.60141	0.109286	0.334373
PA14_20680	856.323	-0.0152408	0.0737265	-0.206721	0.836228	0.936891
PA14_20690	716.271	0.0439147	0.0766974	0.572571	0.566935	0.806969
PA14_20700	378.593	-0.0405445	0.116026	-0.349442	0.726757	0.890375
PA14_20720	337.393	-0.110062	0.106939	-1.02921	0.303381	0.610729
PA14_20730	1427.79	-0.0200966	0.0724506	-0.277383	0.781486	0.917052
PA14_20740	104.764	0.143224	0.174546	0.820552	0.411901	0.708754
PA14_20750	1.3914	0.441843	1.39099	0.317645	0.750754	0.903474
PA14_20760	4068.26	0.0730581	0.0445273	1.64075	0.10085	0.317769
PA14_20770	1027.26	0.0343985	0.0747945	0.459907	0.645583	0.849986
PA14_20780	1871.47	-0.0478758	0.0609902	-0.784976	0.432468	0.723351
PA14_20800	3287.04	0.045539	0.0553773	0.822341	0.410883	0.708393
PA14_20810	1433.14	-0.192243	0.0570905	-3.36733	0.000759005	0.00566717
PA14_20820	16.3838	-0.131999	0.436587	-0.302342	0.762391	0.90803
PA14_20840	499.028	-0.175731	0.0786666	-2.23387	0.0254915	0.119907
PA14_20850	4964.49	0.113338	0.0388808	2.91502	0.00355667	0.0224638
PA14_20860	584.647	-0.0728837	0.0781105	-0.933085	0.350776	0.659286
PA14_20870	2878.27	0.0350329	0.0597466	0.586358	0.557635	0.801023
PA14_20880	15283	0.010821	0.0332803	0.325147	0.74507	0.90082
PA14_20890	3109.26	0.0755095	0.0433725	1.74095	0.0816919	0.278448
PA14_20900	165.727	0.233629	0.153132	1.52567	0.127091	0.367756
PA14_20920	446.988	0.0397014	0.0849569	0.467312	0.640277	0.847307
PA14_20940	1200.24	-0.0358038	0.0650938	-0.550034	0.582296	0.816858
PA14_20950	3897.44	-0.0351955	0.0500015	-0.70389	0.481502	0.754094
PA14_20960	1599.02	-0.0236189	0.0499176	-0.473157	0.636101	0.845334
PA14_20970	5720.48	0.0444271	0.0471976	0.941299	0.346551	0.65644
PA14_20980	3707.31	0.0339114	0.0405811	0.835646	0.403354	0.70429
PA14_21000	253.565	0.0151813	0.115136	0.131855	0.895099	0.961583
PA14_21010	7479.71	0.000571972	0.0367292	0.0155727	0.987575	0.995842
PA14_21020	1493.85	0.328947	0.0774181	4.24897	2.1476e-05	0.000203914
PA14_21030	4138.24	-0.0406247	0.0377836	-1.07519	0.282288	0.587362
PA14_21040	5112.51	-0.0345392	0.0531311	-0.650076	0.515643	0.777148
PA14_21050	1672.76	0.0430436	0.0682104	0.631042	0.528013	0.784992
PA14_21060	920.351	-0.115532	0.0719942	-1.60473	0.108552	0.332485
PA14_21070	464.059	0.019488	0.0998001	0.195271	0.845181	0.939564
PA14_21080	189.686	0.117618	0.155625	0.755783	0.44978	0.736109
PA14_21090	445.231	0.0324162	0.102483	0.316307	0.751769	0.904125
PA14_21110	1367.53	0.0553176	0.0642248	0.861312	0.389066	0.69081
PA14_21120	162.938	0.414312	0.160097	2.58787	0.00965701	0.0541496
PA14_21130	927.841	-0.0391211	0.0727192	-0.537975	0.590594	0.821773
PA14_21140	106.547	-0.162844	0.161896	-1.00585	0.314486	0.623609
PA14_21150	3488.79	0.00953554	0.0404297	0.235855	0.813545	0.928743
PA14_21160	4020.85	-0.0248245	0.0451297	-0.550071	0.582271	0.816858
PA14_21175	1663.2	0.190848	0.0901662	2.11663	0.0342912	0.15039
PA14_21180	2393.93	0.0541222	0.0767561	0.705119	0.480736	0.753578
PA14_21190	628.192	0.105217	0.086362	1.21832	0.223102	0.516043
PA14_21210	683.627	0.0235212	0.0747355	0.314726	0.75297	0.9043
PA14_21220	661.708	-0.209268	0.0814438	-2.56947	0.0101853	0.0567212
PA14_21230	2545.11	0.023866	0.0487361	0.489699	0.624347	0.841473
PA14_21240	37.4444	-0.117744	0.293713	-0.400882	0.688507	0.872232
PA14_21250	1685.77	0.048757	0.0829861	0.587532	0.556847	0.801023
PA14_21260	1671.34	-0.0220412	0.0758066	-0.290755	0.771238	0.912586
PA14_21280	799.095	-0.0709417	0.0773572	-0.917066	0.359108	0.663092
PA14_21290	1447.46	-0.0167981	0.068095	-0.246686	0.805151	0.923839
PA14_21300	1495.82	0.00746254	0.0533957	0.139759	0.88885	0.959413
PA14_21310	1086.06	0.0657985	0.106366	0.618606	0.536176	0.790976
PA14_21320	954.756	-0.0304614	0.0636311	-0.478719	0.632139	0.844185
PA14_21340	2416.91	-0.0443149	0.0505482	-0.876685	0.380658	0.684103
PA14_21370	1686.73	-0.113249	0.0583266	-1.94163	0.0521814	0.203337
PA14_21380	1128.69	-0.0215915	0.0654928	-0.329677	0.741644	0.898085
PA14_21400	2329.72	0.025874	0.0607811	0.425691	0.670333	0.86349
PA14_21410	450.866	-0.0555491	0.10456	-0.531267	0.595234	0.824621
PA14_21440	585.661	0.0829847	0.082442	1.00658	0.314135	0.623609
PA14_21450	1139.72	0.0306588	0.060895	0.503469	0.614635	0.835698
PA14_21460	2976.73	0.297133	0.0550084	5.40159	6.6054e-08	7.87258e-07
PA14_21470	14.4027	0.245384	0.444089	0.552555	0.580568	0.816519
PA14_21480	1157.27	0.0104106	0.0713036	0.146004	0.883919	0.956559
PA14_21490	342.404	0.049568	0.108486	0.456905	0.647739	0.851643
PA14_21510	791.651	-0.0463522	0.0699255	-0.662881	0.507407	0.770647
PA14_21520	902	0.195856	0.0686131	2.8545	0.00431052	0.0266635
PA14_21530	6516.83	0.204407	0.139447	1.46585	0.14269	0.394515
PA14_21540	328.22	0.404566	0.0984254	4.11039	3.94998e-05	0.000365738
PA14_21550	1029.95	-0.0681684	0.0624647	-1.09131	0.275136	0.57925
PA14_21560	450.166	-0.0732773	0.089562	-0.818174	0.413258	0.709846
PA14_21570	727.649	-0.0320561	0.0736277	-0.435381	0.663286	0.859599
PA14_21580	436.444	-0.0413533	0.101782	-0.406294	0.684526	0.871647
PA14_21590	4240.07	0.0514716	0.0462673	1.11248	0.26593	0.567629
PA14_21600	940.902	-1.31309	0.0682512	-19.2391	1.74265e-82	1.21072e-80
PA14_21610	5358.65	0.0274643	0.0385458	0.712511	0.476148	0.751059
PA14_21620	1218.86	-0.0644292	0.0567304	-1.13571	0.256078	0.554917
PA14_21630	2133.35	0.0538149	0.0598154	0.899684	0.368288	0.67205
PA14_21640	4077.59	-0.0194139	0.0598577	-0.324334	0.745686	0.901182
PA14_21650	2455.09	-0.0110824	0.051393	-0.21564	0.829269	0.934183
PA14_21660	537.945	0.060369	0.0894686	0.67475	0.499834	0.765029
PA14_21670	1408.04	0.071405	0.0552429	1.29257	0.196161	0.477577
PA14_21680	2069.58	3.15803e-05	0.0526332	0.000600007	0.999521	0.9999
PA14_21690	2363.64	0.106223	0.0451248	2.35398	0.0185737	0.0929239
PA14_21700	781.606	-0.152076	0.0752108	-2.02199	0.043177	0.178894
PA14_21710	4278.18	0.0985253	0.0539493	1.82626	0.0678116	0.245334
PA14_21720	3445.42	-0.0364397	0.0821918	-0.443349	0.657513	0.8571
PA14_21730	1894.39	0.0620323	0.0589165	1.05289	0.292394	0.599299
PA14_21750	1191.25	0.0609801	0.0632781	0.963684	0.335204	0.64715
PA14_21760	3259.34	0.113388	0.0460095	2.46445	0.0137225	0.0715909
PA14_21770	565.166	0.148468	0.0795853	1.86553	0.0621078	0.230808
PA14_21780	12.2513	-1.33999	0.530006	-2.52825	0.0114633	0.061668
PA14_21790	454.061	-0.148996	0.0881207	-1.69081	0.0908727	0.296168
PA14_21800	1198.7	-2.35099	0.079465	-29.5852	2.31384e-192	5.49248e-190
PA14_21820	926.211	0.0788789	0.0694272	1.13614	0.255899	0.554917
PA14_21830	1832.87	-0.0770099	0.0567663	-1.35661	0.174904	0.449438
PA14_21840	3728.08	0.0356215	0.051439	0.6925	0.488624	0.758085
PA14_21850	4788.58	-0.0638199	0.0407741	-1.56521	0.117534	0.350389
PA14_21860	782.189	0.0525308	0.0846871	0.620293	0.535065	0.790698
PA14_21870	794.3	0.0230446	0.0853715	0.269933	0.787212	0.918592
PA14_21890	752.707	-0.008604	0.0779997	-0.110308	0.912165	0.966361
PA14_21900	1244.23	-0.00444371	0.055668	-0.0798252	0.936376	0.975949
PA14_21910	1122.73	0.176874	0.0932921	1.89591	0.0579714	0.220322
PA14_21920	0.356314	-1.91231	3.10961	-0.614968	0.538576	0.792219
PA14_21930	4452.8	0.000457513	0.0416535	0.0109838	0.991236	0.997012
PA14_21940	744.756	-0.0399222	0.0764933	-0.521905	0.601736	0.827842
PA14_21960	1818.93	0.0137918	0.0559395	0.246549	0.805257	0.923839
PA14_21970	2447.95	-0.0379861	0.0613486	-0.619184	0.535795	0.790784
PA14_21980	1995.61	0.060912	0.0601377	1.01287	0.31112	0.620606
PA14_21990	323.762	0.209003	0.105346	1.98397	0.0472595	0.19122
PA14_22000	241.086	-0.0208158	0.136816	-0.152145	0.879073	0.954283
PA14_22010	254.649	0.137542	0.129655	1.06083	0.288765	0.595187
PA14_22020	13.2318	0.253719	0.51243	0.495129	0.620509	0.839207
PA14_22040	6819.59	0.00436343	0.0503297	0.0866969	0.930912	0.972438
PA14_22050	511.113	0.576817	0.089834	6.42092	1.35454e-10	1.94379e-09
PA14_22060	224.446	-0.746683	0.164389	-4.54217	5.56769e-06	5.63394e-05
PA14_22075	1460.62	-0.0797108	0.0615663	-1.29472	0.195418	0.476787
PA14_22080	12.2821	-0.768634	0.491893	-1.5626	0.118146	0.351477
PA14_22090	1910.67	-0.152746	0.206413	-0.740001	0.459299	0.742394
PA14_22100	3165.11	0.0645356	0.0485495	1.32927	0.183758	0.461418
PA14_22110	2589.91	0.0231304	0.05667	0.40816	0.683156	0.87068
PA14_22120	654.413	0.0410058	0.0985648	0.416029	0.677389	0.865932
PA14_22140	2680.14	0.056982	0.0619251	0.920177	0.35748	0.663086
PA14_22160	2549.25	0.0475405	0.0628086	0.756911	0.449103	0.73566
PA14_22180	1644.26	-0.0965154	0.0584774	-1.65047	0.098846	0.313894
PA14_22190	3542.43	0.00172101	0.0434013	0.0396535	0.968369	0.989561
PA14_22210	807.008	-0.229577	0.126241	-1.81855	0.0689796	0.247914
PA14_22220	623.209	0.101707	0.0739153	1.37599	0.168825	0.440584
PA14_22230	252.828	-0.13474	0.127533	-1.05651	0.290737	0.597169
PA14_22240	923.194	-0.146154	0.21504	-0.67966	0.49672	0.762258
PA14_22250	895.914	-0.0499598	0.0833655	-0.599286	0.548982	0.797415
PA14_22260	1957.3	0.0450324	0.0577077	0.780353	0.435183	0.72554
PA14_22270	984.127	0.0269145	0.0669216	0.40218	0.687551	0.872186
PA14_22280	1929.92	-0.00380253	0.0532358	-0.0714281	0.943057	0.979558
PA14_22290	5297.19	-0.0999799	0.0391053	-2.55668	0.0105676	0.0584499
PA14_22310	839.594	-0.0224089	0.0840567	-0.266593	0.789783	0.919322
PA14_22320	1167.61	-1.03881	0.0783564	-13.2575	4.08342e-40	1.4631e-38
PA14_22330	5139.53	-0.0404013	0.0434556	-0.929716	0.352518	0.659539
PA14_22340	737.127	-0.00396301	0.0742565	-0.0533692	0.957438	0.984092
PA14_22350	726.328	-0.0160931	0.0736367	-0.218547	0.827003	0.933327
PA14_22370	128.533	-0.0368226	0.168066	-0.219096	0.826575	0.933254
PA14_22380	1540.95	0.134965	0.052648	2.56354	0.010361	0.0575307
PA14_22400	418.19	0.175772	0.0913501	1.92416	0.0543346	0.209718
PA14_22410	949.844	0.00172202	0.108325	0.0158968	0.987317	0.995842
PA14_22420	1103.77	0.0902722	0.0605657	1.49048	0.136097	0.384596
PA14_22440	240.515	0.102818	0.131598	0.781301	0.434625	0.725267
PA14_22450	1084.12	-0.048166	0.0563845	-0.854243	0.39297	0.694878
PA14_22460	686.87	0.0701768	0.123505	0.568208	0.569893	0.808459
PA14_22470	8479.34	-0.0200121	0.0587728	-0.3405	0.73348	0.893444
PA14_22480	1538.59	0.018387	0.0584752	0.314441	0.753186	0.9043
PA14_22490	1157.88	0.0320495	0.0715718	0.447795	0.654301	0.854727
PA14_22500	2490.04	-0.0575479	0.0446174	-1.28981	0.197117	0.479084
PA14_22510	926.668	0.162149	0.0637581	2.54318	0.0109847	0.0602263
PA14_22520	960.169	0.243654	0.0759182	3.20943	0.00132996	0.00931956
PA14_22530	1628.59	0.0933353	0.0546964	1.70643	0.0879287	0.290626
PA14_22540	156.592	-0.0110382	0.14527	-0.0759842	0.939432	0.977881
PA14_22550	209.543	-0.43364	0.138017	-3.14192	0.00167842	0.0115482
PA14_22560	56.6469	-0.0882854	0.277374	-0.31829	0.750265	0.903474
PA14_22570	1185.98	0.0100603	0.0660475	0.15232	0.878935	0.954283
PA14_22580	1741.32	0.0183078	0.0874502	0.209351	0.834174	0.936043
PA14_22590	307.991	0.135499	0.118957	1.13906	0.254676	0.553942
PA14_22600	1415.54	0.119122	0.0684551	1.74014	0.0818341	0.2785
PA14_22620	225.487	0.106081	0.121991	0.869578	0.384531	0.686947
PA14_22630	1607.91	0.0726436	0.0892043	0.81435	0.415444	0.710938
PA14_22640	2258.99	0.0691459	0.0557097	1.24118	0.214538	0.504634
PA14_22650	1.21293	2.00787	1.67684	1.19741	0.231146	0.526315
PA14_22660	3036.31	-0.0355871	0.0476974	-0.746103	0.455605	0.739482
PA14_22670	16526.8	0.0450775	0.0363448	1.24027	0.214874	0.505216
PA14_22680	226.991	-0.108585	0.128455	-0.845316	0.397935	0.69927
PA14_22690	3635.34	-0.275138	0.0673403	-4.08578	4.39284e-05	0.000401058
PA14_22700	493.263	0.107508	0.0959408	1.12057	0.262473	0.562905
PA14_22710	1611.03	-0.0259059	0.055543	-0.466412	0.640921	0.84734
PA14_22720	789.722	0.147489	0.0696479	2.11764	0.0342057	0.150187
PA14_22730	925.199	0.0518854	0.0728704	0.712023	0.476451	0.751059
PA14_22740	88.5719	0.195985	0.206092	0.950959	0.341625	0.652224
PA14_22760	628.383	0.0640922	0.124009	0.516834	0.605272	0.8309
PA14_22770	833.25	0.133284	0.231962	0.574594	0.565566	0.805708
PA14_22780	4003	-0.0300235	0.0509206	-0.589615	0.555449	0.800767
PA14_22800	1793.7	-0.197266	0.0627285	-3.14476	0.00166222	0.0114687
PA14_22820	1821.43	0.138765	0.0988356	1.404	0.160319	0.426839
PA14_22830	3473.26	0.155095	0.142027	1.09201	0.274829	0.579031
PA14_22840	1086.38	0.0500396	0.0705403	0.709377	0.478091	0.75195
PA14_22860	4711.14	0.0459696	0.0712856	0.644865	0.519015	0.77888
PA14_22870	263.957	0.12674	0.128415	0.986958	0.323663	0.634181
PA14_22880	3517.03	0.0468694	0.0413607	1.13319	0.257135	0.555939
PA14_22890	1193.88	-0.0365251	0.0677232	-0.539329	0.58966	0.821773
PA14_22910	433.566	-0.107469	0.1073	-1.00158	0.316548	0.625511
PA14_22930	1016.94	0.130981	0.0673568	1.94459	0.0518242	0.202916
PA14_22940	3576.16	-0.11221	0.0491731	-2.28193	0.0224933	0.109152
PA14_22960	11827.5	-0.00513585	0.0320894	-0.160048	0.872843	0.951381
PA14_22980	1696.85	-0.0465947	0.0608877	-0.765255	0.44412	0.731957
PA14_22990	611.899	0.0826953	0.0792015	1.04411	0.296434	0.603247
PA14_23000	815.533	0.187111	0.0804845	2.3248	0.0200826	0.0992284
PA14_23010	708.741	-0.0949446	0.0829433	-1.14469	0.252336	0.551423
PA14_23030	37.6195	-2.01046	0.334043	-6.01856	1.75978e-09	2.37009e-08
PA14_23050	609.528	-0.164708	0.0740297	-2.22489	0.0260885	0.122125
PA14_23060	917.701	-0.102394	0.0637992	-1.60494	0.108508	0.332485
PA14_23070	2761.42	-0.0802917	0.0519936	-1.54426	0.122525	0.358882
PA14_23080	2333.85	-0.111028	0.0536439	-2.06973	0.0384778	0.165191
PA14_23090	3390.03	0.0187988	0.0461985	0.406913	0.684072	0.871457
PA14_23100	758.795	0.031567	0.0887548	0.355666	0.722091	0.889072
PA14_23110	4456.74	-0.0961816	0.0563677	-1.70632	0.0879478	0.290626
PA14_23120	409.353	-0.180473	0.102073	-1.76808	0.0770482	0.267134
PA14_23130	1830.84	0.035184	0.0585442	0.600981	0.547853	0.796703
PA14_23160	970.518	0.105162	0.0839161	1.25319	0.210138	0.498515
PA14_23170	1042.67	0.00998321	0.0639342	0.156148	0.875916	0.953561
PA14_23190	3479.98	0.128658	0.0465755	2.76236	0.00573853	0.0344857
PA14_23200	168.617	-0.361548	0.134917	-2.67977	0.00736722	0.0431801
PA14_23210	3770.4	-0.511252	0.0449211	-11.3811	5.19409e-30	1.49448e-28
PA14_23220	2282.97	-1.22049	0.0604873	-20.1776	1.54071e-90	1.20239e-88
PA14_23240	1688.47	-0.13922	0.0543289	-2.56255	0.0103907	0.0576396
PA14_23250	8658.01	-0.0516974	0.0422791	-1.22276	0.221419	0.513702
PA14_23260	101.818	-2.37444	0.200633	-11.8347	2.5819e-32	7.82399e-31
PA14_23270	456.301	0.174191	0.107022	1.62762	0.103606	0.322536
PA14_23280	309.547	-1.38819	0.118845	-11.6807	1.60041e-31	4.77358e-30
PA14_23290	190.678	-1.24656	0.128867	-9.67323	3.9181e-22	9.00058e-21
PA14_23310	989.415	-0.514591	0.273442	-1.8819	0.059849	0.225056
PA14_23320	7.74355	-2.82304	0.758389	-3.72241	0.000197328	0.00161057
PA14_23330	1533.04	-0.661007	0.0552018	-11.9744	4.84119e-33	1.5154e-31
PA14_23340	4511	0.323091	0.0837363	3.85843	0.000114118	0.000973249
PA14_23360	3015.25	-0.00829079	0.0532637	-0.155656	0.876305	0.953561
PA14_23370	142.415	0.107535	0.167238	0.643006	0.52022	0.779305
PA14_23380	1642.81	0.157179	0.0605595	2.59545	0.00944668	0.0531474
PA14_23390	605.099	0.137353	0.0989758	1.38774	0.165217	0.434351
PA14_23400	1539.84	0.100102	0.0644215	1.55386	0.120218	0.355645
PA14_23410	3113.09	0.116464	0.0582225	2.00033	0.0454644	0.185272
PA14_23420	1128.98	0.617832	0.0697893	8.85282	8.53347e-19	1.78078e-17
PA14_23430	9217.86	0.183642	0.0449237	4.08786	4.35369e-05	0.000398121
PA14_23440	2841.65	0.0113121	0.0520067	0.217513	0.827809	0.933707
PA14_23450	3346.74	0.0983943	0.0494475	1.98987	0.0466051	0.189379
PA14_23460	1302	0.129993	0.0746101	1.7423	0.0814563	0.278045
PA14_23470	6827.77	0.126716	0.0486316	2.60563	0.00917048	0.0519843
PA14_23480	384.974	-0.0128783	0.0890333	-0.144646	0.88499	0.956878
PA14_23500	2636.38	0.0314129	0.0546533	0.574766	0.56545	0.805708
PA14_23510	1624.33	-0.033697	0.0707192	-0.47649	0.633725	0.845115
PA14_23520	1432.77	-0.0165585	0.0544783	-0.303947	0.761169	0.90803
PA14_23530	23.8784	0.0178617	0.374795	0.0476573	0.961989	0.98712
PA14_23540	1431.75	-0.0448268	0.0582293	-0.769833	0.441399	0.729519
PA14_23560	648.788	-0.721454	0.0935356	-7.71316	1.22744e-14	2.21289e-13
PA14_23580	612.869	-0.222617	0.102525	-2.17135	0.029905	0.135924
PA14_23590	1595.56	0.159124	0.0621088	2.56202	0.0104065	0.0576713
PA14_23610	796.459	-0.112677	0.0668511	-1.6855	0.0918924	0.297957
PA14_23620	4024.56	0.0234026	0.0460198	0.508532	0.61108	0.83385
PA14_23630	405.554	-0.0197145	0.0977967	-0.201587	0.84024	0.938481
PA14_23640	2695.32	0.0527918	0.0515935	1.02323	0.306201	0.615482
PA14_23650	3147.13	-0.0497752	0.0433189	-1.14904	0.250539	0.548616
PA14_23670	610.628	-0.0193586	0.0781418	-0.247737	0.804338	0.923667
PA14_23680	789.826	-0.0202048	0.0744063	-0.271547	0.78597	0.918309
PA14_23690	4322.6	0.120498	0.0700883	1.71923	0.0855731	0.286576
PA14_23700	565.367	0.0351456	0.0835265	0.420772	0.673921	0.865406
PA14_23720	910.127	0.0963548	0.0933211	1.03251	0.301834	0.608906
PA14_23730	8072.24	0.0130491	0.0510316	0.255707	0.798177	0.921564
PA14_23750	874.221	-0.297115	0.0737869	-4.02666	5.65742e-05	0.000505177
PA14_23760	220.802	0.298172	0.16533	1.8035	0.0713103	0.253434
PA14_23770	5397.51	0.0923117	0.0849298	1.08692	0.277073	0.580966
PA14_23790	4470.32	0.0316795	0.0409867	0.772922	0.439568	0.728709
PA14_23800	532.747	-0.0394186	0.0905002	-0.435564	0.663153	0.859599
PA14_23810	1527.27	-0.00687242	0.0660447	-0.104057	0.917124	0.968709
PA14_23830	4098.97	0.265376	0.0500877	5.29822	1.16939e-07	1.37645e-06
PA14_23840	1597.75	0.0453877	0.0658511	0.689248	0.490667	0.759722
PA14_23850	1803.11	-0.00461122	0.0587203	-0.0785285	0.937408	0.976368
PA14_23860	41.2829	-0.160486	0.290846	-0.55179	0.581092	0.816519
PA14_23880	96.0949	0.115897	0.207328	0.559003	0.57616	0.813679
PA14_23890	6704.38	0.0622347	0.0696342	0.893737	0.371463	0.675735
PA14_23900	5165.11	0.0919624	0.0430008	2.13862	0.0324664	0.144388
PA14_23920	6904.71	0.0262407	0.0384767	0.681989	0.495246	0.762258
PA14_23930	326.16	0.118167	0.153749	0.768571	0.442148	0.730489
PA14_23950	11953.7	0.00541952	0.0379147	0.14294	0.886338	0.95779
PA14_23970	1354.49	0.0352924	0.088421	0.399141	0.689789	0.872897
PA14_23980	2493.5	0.0443309	0.0648968	0.683097	0.494545	0.762084
PA14_23990	21.503	0.41005	0.417225	0.982804	0.325704	0.63664
PA14_24010	1030.14	-0.0343624	0.0679801	-0.505477	0.613224	0.834576
PA14_24020	49.0218	-0.147895	0.262098	-0.564275	0.572567	0.811018
PA14_24040	1176.28	0.123998	0.0561213	2.20947	0.0271418	0.125296
PA14_24050	1291.88	-0.0843428	0.0610189	-1.38224	0.166898	0.43756
PA14_24060	1058.73	-0.354473	0.0653474	-5.42444	5.81364e-08	6.97269e-07
PA14_24070	1715.98	-0.0612836	0.0670404	-0.914129	0.360649	0.664284
PA14_24080	2767.87	0.141045	0.0762304	1.85025	0.0642779	0.236558
PA14_24100	5306.55	0.0369688	0.063352	0.583546	0.559526	0.801349
PA14_24140	2881.27	0.0633981	0.0524475	1.20879	0.226743	0.521289
PA14_24150	1513.42	0.362482	0.0776152	4.67025	3.00839e-06	3.13897e-05
PA14_24170	38.8107	-2.12211	0.314475	-6.74811	1.49786e-11	2.30008e-10
PA14_24180	861.234	0.0162804	0.0768653	0.211804	0.83226	0.934803
PA14_24190	132.833	0.237029	0.155707	1.52227	0.12794	0.369613
PA14_24210	5987.8	-0.0340112	0.0426125	-0.798151	0.424783	0.719372
PA14_24220	3.64024	-0.174157	0.897698	-0.194004	0.846173	0.939697
PA14_24230	5250.08	0.424925	0.0686863	6.18645	6.15329e-10	8.59198e-09
PA14_24240	1253.12	-0.110945	0.0646532	-1.716	0.0861624	0.287899
PA14_24245	1545.39	0.0169559	0.0604725	0.28039	0.779178	0.916765
PA14_24260	1951.83	0.00393631	0.0650587	0.0605041	0.951754	0.982033
PA14_24270	3203.68	0.0390771	0.0511675	0.763708	0.445041	0.732351
PA14_24290	2617.33	0.0726242	0.0485653	1.49539	0.134812	0.381671
PA14_24300	2392.22	-0.0260607	0.0511474	-0.509522	0.610386	0.833521
PA14_24310	2393.96	0.640794	0.07505	8.53823	1.36298e-17	2.71499e-16
PA14_24330	3298.15	0.0159576	0.0417133	0.382556	0.702049	0.879221
PA14_24340	365.196	0.391362	0.112729	3.47171	0.000517151	0.00394406
PA14_24350	730.732	0.0510951	0.0710289	0.719356	0.471922	0.749805
PA14_24360	2765.12	0.0166401	0.0484698	0.343308	0.731367	0.892475
PA14_24370	1705.75	0.113562	0.0493352	2.30185	0.0213434	0.104552
PA14_24380	3208.86	0.186016	0.040483	4.59493	4.32904e-06	4.43571e-05
PA14_24410	3048.15	0.0199502	0.0429976	0.463984	0.64266	0.848293
PA14_24420	1093.73	-0.00727327	0.0764567	-0.0951293	0.924212	0.969835
PA14_24430	5836.45	0.00565624	0.0398051	0.142099	0.887002	0.957962
PA14_24440	1391.87	0.181495	0.0791218	2.29387	0.0217982	0.106504
PA14_24445	2239.5	-0.0331848	0.0482724	-0.687448	0.4918	0.759993
PA14_24480	3934.37	-0.0459356	0.050296	-0.913305	0.361082	0.664433
PA14_24490	1752.88	0.0106055	0.0566029	0.187367	0.851373	0.941944
PA14_24500	281.072	-0.0951682	0.135611	-0.701773	0.482821	0.754094
PA14_24510	2954.46	-0.0471456	0.0559351	-0.842862	0.399305	0.700434
PA14_24530	3265.88	0.326639	0.0405653	8.05219	8.1328e-16	1.53929e-14
PA14_24550	960.398	-0.0275822	0.0791026	-0.348689	0.727323	0.890617
PA14_24560	2132.06	0.00956994	0.0587908	0.16278	0.870692	0.950437
PA14_24570	1464.72	0.0605823	0.0628984	0.963177	0.335459	0.64715
PA14_24580	1607.65	0.000822151	0.394467	0.00208421	0.998337	0.999565
PA14_24590	2603.3	0.179834	0.0541626	3.32027	0.000899306	0.00659376
PA14_24600	308.506	-0.479213	0.102028	-4.69688	2.64164e-06	2.78178e-05
PA14_24610	290.714	0.0536384	0.111997	0.478929	0.631989	0.844184
PA14_24620	2525.85	0.0134012	0.0472425	0.283669	0.776664	0.915428
PA14_24630	2870.54	0.134894	0.0440263	3.06394	0.00218441	0.0146407
PA14_24640	698.578	-0.141593	0.0720749	-1.96452	0.0494696	0.197257
PA14_24650	1056.31	-0.00710958	0.0642383	-0.110675	0.911874	0.966361
PA14_24665	659.696	0.014706	0.083138	0.176887	0.859597	0.94482
PA14_24675	1836.59	0.111205	0.0608465	1.82764	0.067604	0.245
PA14_24690	1537.52	-0.0988176	0.0577862	-1.71005	0.0872557	0.289439
PA14_24700	936.676	-1.94336	0.088835	-21.8761	4.38943e-106	4.16776e-104
PA14_24710	3838.3	0.0762567	0.0387082	1.97004	0.0488335	0.195643
PA14_24720	2653.05	0.229383	0.0567355	4.04302	5.27664e-05	0.000473402
PA14_24730	920.652	0.304991	0.0767032	3.97624	7.00126e-05	0.000616479
PA14_24740	354.681	0.00151732	0.102163	0.014852	0.98815	0.995842
PA14_24760	2.52937	0.0571322	1.04651	0.0545932	0.956463	0.983832
PA14_24770	2602.79	0.00197192	0.0460349	0.0428353	0.965833	0.988672
PA14_24780	1026.06	0.00651203	0.057799	0.112667	0.910295	0.966168
PA14_24790	20.4106	-0.179698	0.435102	-0.413003	0.679604	0.867901
PA14_24810	113.513	-0.0779496	0.176389	-0.441919	0.658548	0.8571
PA14_24820	1017.6	0.0838389	0.0798093	1.05049	0.293493	0.600687
PA14_24830	0.108377	0.818774	3.53381	0.231697	0.816773	0.928959
PA14_24840	1994.8	0.0043661	0.049626	0.08798	0.929893	0.972187
PA14_24850	1850.43	-0.0307172	0.0625523	-0.491065	0.62338	0.840966
PA14_24860	69.0385	-0.135351	0.206472	-0.655544	0.512118	0.774508
PA14_24880	904.188	0.346544	0.072719	4.76553	1.8836e-06	2.0133e-05
PA14_24890	245.569	0.216631	0.122895	1.76273	0.0779459	0.269616
PA14_24900	744.942	0.04454	0.0762494	0.584136	0.559129	0.801146
PA14_24920	3076.84	-0.0492379	0.0456356	-1.07894	0.280616	0.586216
PA14_24940	1118.14	0.0916167	0.0733285	1.2494	0.211519	0.499595
PA14_24950	707.499	-0.016797	0.0738175	-0.227547	0.819998	0.930354
PA14_24960	1860.61	0.0385256	0.0572461	0.672984	0.500958	0.765546
PA14_24970	2956.52	-0.00827428	0.0577561	-0.143262	0.886083	0.957696
PA14_24980	3399.95	0.0382977	0.0471584	0.812108	0.416729	0.712517
PA14_24990	136.59	0.0756546	0.174178	0.434352	0.664033	0.860304
PA14_25000	2057.43	0.0276953	0.0458228	0.6044	0.545578	0.796065
PA14_25020	2806.67	-0.0129016	0.0497883	-0.259129	0.795536	0.920798
PA14_25030	184.326	0.184811	0.124891	1.47978	0.138933	0.388182
PA14_25040	3979.52	0.0947693	0.039598	2.39329	0.0166982	0.0845658
PA14_25050	2070.83	-0.445532	0.0595362	-7.48337	7.24391e-14	1.2393e-12
PA14_25060	1629	0.0266951	0.0528725	0.504896	0.613632	0.834933
PA14_25080	18673.1	-0.103633	0.0415611	-2.49351	0.0126486	0.0669707
PA14_25090	5096.57	-0.104378	0.0417311	-2.5012	0.0123773	0.0657774
PA14_25100	1838.51	-0.0268165	0.049347	-0.543427	0.586836	0.820016
PA14_25110	701.67	-0.343486	0.0800979	-4.28833	1.80023e-05	0.000171791
PA14_25140	51661.5	-0.073513	0.037062	-1.98351	0.0473102	0.191289
PA14_25150	401.879	0.0353578	0.0967394	0.365496	0.714742	0.885671
PA14_25160	38.6102	-0.133545	0.306324	-0.43596	0.662866	0.859599
PA14_25180	1040.67	-0.223148	0.0645186	-3.45867	0.000542853	0.00412901
PA14_25195	1586.69	-0.0990594	0.0752069	-1.31716	0.187786	0.466964
PA14_25210	510.269	0.143712	0.0876431	1.63974	0.10106	0.317769
PA14_25220	20.52	-0.302406	0.426147	-0.709629	0.477934	0.75195
PA14_25230	1635.91	0.0524299	0.0621104	0.84414	0.398591	0.69991
PA14_25250	1139.95	-0.400092	0.0620341	-6.44955	1.12183e-10	1.62623e-09
PA14_25270	1219.91	-0.0496881	0.0617258	-0.80498	0.420831	0.716734
PA14_25280	172.575	-0.265584	0.186076	-1.42729	0.153496	0.413851
PA14_25305	980.796	-0.0512123	0.0722539	-0.708783	0.478459	0.75195
PA14_25320	917.933	0.0763918	0.066933	1.14132	0.253738	0.553212
PA14_25330	1021.65	-0.157187	0.0703276	-2.23507	0.0254128	0.11965
PA14_25340	1321.51	-0.0268018	0.0756924	-0.354089	0.723272	0.889252
PA14_25350	177.306	0.0188599	0.162642	0.11596	0.907685	0.965458
PA14_25360	83.6594	-0.376942	0.181966	-2.0715	0.0383122	0.164604
PA14_25370	476.184	-0.0744053	0.0921416	-0.80751	0.419372	0.715533
PA14_25390	1161.72	-1.20606	0.071841	-16.7879	2.99388e-63	1.57927e-61
PA14_25400	882.006	-0.0244245	0.0668443	-0.365393	0.714818	0.885671
PA14_25410	141.695	-0.141354	0.183058	-0.772182	0.440007	0.728709
PA14_25420	434.827	-1.62924	0.0991174	-16.4375	1.03107e-60	5.29189e-59
PA14_25430	246.936	-1.33941	0.140948	-9.50282	2.04275e-21	4.58171e-20
PA14_25440	317.009	-0.361994	0.102847	-3.51974	0.000431976	0.00332114
PA14_25450	243.794	-1.90729	0.123384	-15.4582	6.63959e-54	3.12609e-52
PA14_25470	3657.2	0.0912638	0.0523999	1.74168	0.0815645	0.278247
PA14_25480	2206.22	0.0117198	0.0578145	0.202713	0.839359	0.938062
PA14_25490	133.087	-2.70662	0.189566	-14.278	3.00188e-46	1.21289e-44
PA14_25500	4808.93	-0.275547	0.0453492	-6.0761	1.23137e-09	1.69447e-08
PA14_25510	1312.36	-0.528382	0.0802054	-6.58787	4.46191e-11	6.61966e-10
PA14_25520	2237.16	0.537136	0.0645202	8.32509	8.4268e-17	1.64974e-15
PA14_25530	44.9054	-1.39969	0.28481	-4.91447	8.90222e-07	9.67862e-06
PA14_25540	1225.89	-1.41583	0.0654481	-21.6329	8.80059e-104	7.95825e-102
PA14_25550	1067.33	-0.747014	0.0668817	-11.1692	5.77068e-29	1.60369e-27
PA14_25560	65.7695	-1.18145	0.223637	-5.2829	1.27156e-07	1.47538e-06
PA14_25580	4466.01	-0.0416447	0.0613298	-0.679029	0.49712	0.762258
PA14_25590	2632.84	0.0266333	0.0491218	0.542189	0.587688	0.820804
PA14_25600	6487.05	-0.0577427	0.0636407	-0.907324	0.364236	0.668014
PA14_25610	3025.21	-0.0383899	0.0465428	-0.824831	0.409468	0.708393
PA14_25620	1.30281	-2.81756	1.75054	-1.60954	0.107499	0.330682
PA14_25630	17.3747	-0.494161	0.382059	-1.29341	0.195868	0.477338
PA14_25640	288.638	-0.106245	0.101193	-1.04992	0.293754	0.600687
PA14_25650	329.207	-1.4486	0.121709	-11.9021	1.15372e-32	3.53373e-31
PA14_25660	49.0738	-1.31067	0.254927	-5.14133	2.72793e-07	3.09582e-06
PA14_25670	351.523	-3.80634	0.144602	-26.3229	1.04966e-152	1.49498e-150
PA14_25690	1231.11	-0.0885058	0.0840199	-1.05339	0.292162	0.599153
PA14_25710	6110.31	0.0258428	0.0454976	0.568002	0.570033	0.808459
PA14_25730	600.094	-2.43987	0.0964467	-25.2976	3.39136e-141	4.60013e-139
PA14_25740	1081.97	-0.530703	0.0701639	-7.56376	3.91572e-14	6.88513e-13
PA14_25760	1089.17	-0.759641	0.0653049	-11.6322	2.82661e-31	8.34362e-30
PA14_25770	1864.8	0.259539	0.0656728	3.952	7.74992e-05	0.000679251
PA14_25780	1599.52	0.0196735	0.0598207	0.328874	0.742251	0.898174
PA14_25790	206.485	-0.094786	0.134109	-0.706782	0.479702	0.753062
PA14_25800	5226.73	0.0126365	0.0450531	0.280481	0.779109	0.916765
PA14_25810	1238.48	0.0209353	0.0886158	0.236248	0.81324	0.928743
PA14_25820	261.974	-0.0135878	0.118025	-0.115126	0.908345	0.965458
PA14_25830	2458.15	-0.0124151	0.0531009	-0.233802	0.815139	0.928749
PA14_25840	579.931	-1.03093	0.0846648	-12.1766	4.13954e-34	1.33237e-32
PA14_25860	3269.44	-0.947491	0.0460468	-20.5767	4.43705e-94	3.51082e-92
PA14_25880	1327.67	-0.053874	0.0577011	-0.933674	0.350472	0.659175
[truncated: 3,698 more rows]

## Sheet: set1-G14
	baseMean	log2FoldChange	lfcSE	stat	pvalue	padj
PA14_00010	676.262	-0.55994	0.0715263	-7.82845	4.93918e-15	5.3989e-14
PA14_00020	414.901	-1.60728	0.10754	-14.9458	1.65839e-50	4.08066e-49
PA14_00030	584.203	-0.068919	0.0811317	-0.849471	0.395619	0.629888
PA14_00050	6129.07	-1.58598	0.0486035	-32.6309	1.49532e-233	2.4284e-231
PA14_00060	387.35	-1.77193	0.100967	-17.5496	5.99253e-69	1.86129e-67
PA14_00070	436.118	-2.98641	0.11018	-27.1049	8.62794e-162	7.43048e-160
PA14_00080	487.929	-0.0369774	0.12031	-0.30735	0.758577	0.885558
PA14_00090	135.24	-6.61401	0.458104	-14.4378	2.99323e-47	6.88807e-46
PA14_00100	757.974	-6.61769	0.198527	-33.334	1.24148e-243	2.3522e-241
PA14_00110	4106.27	0.0179422	0.0382325	0.469292	0.638861	0.819367
PA14_00130	1607	-0.236275	0.0643907	-3.6694	0.000243122	0.00120796
PA14_00140	2074.92	0.577921	0.0554518	10.422	1.96701e-25	2.98943e-24
PA14_00150	1799.05	0.151383	0.0694041	2.18118	0.02917	0.0937796
PA14_00160	205.683	0.156499	0.125849	1.24355	0.213664	0.43051
PA14_00170	2097.74	-0.0626049	0.0461778	-1.35573	0.175184	0.37689
PA14_00180	2089.85	-0.0305859	0.0673008	-0.454466	0.649494	0.826628
PA14_00190	743.923	-0.0123205	0.0829538	-0.148523	0.88193	0.947587
PA14_00200	152.454	-4.54726	0.240281	-18.9247	7.13363e-80	2.48758e-78
PA14_00210	108.395	-0.571913	0.212361	-2.69312	0.00707871	0.0270581
PA14_00230	570.027	0.282897	0.0953393	2.96726	0.00300466	0.0124752
PA14_00240	154.905	0.231998	0.193068	1.20164	0.229504	0.450761
PA14_00250	829.315	-0.215165	0.0794881	-2.70688	0.00679181	0.0261372
PA14_00280	1232.01	-2.8434	0.074492	-38.1706	0	0
PA14_00290	158.913	-0.793199	0.141406	-5.60937	2.03069e-08	1.50881e-07
PA14_00310	5462.43	0.174169	0.0414063	4.20634	2.59542e-05	0.000146353
PA14_00320	1878.54	0.00592108	0.056954	0.103963	0.917199	0.963831
PA14_00340	22.0906	0.0197976	0.348191	0.0568582	0.954658	0.98094
PA14_00360	1876.61	0.268134	0.0501131	5.35058	8.76733e-08	6.26836e-07
PA14_00380	933.317	-0.0765151	0.0644179	-1.18779	0.234915	0.457749
PA14_00400	450.354	0.245516	0.0937	2.62023	0.00878695	0.0330106
PA14_00410	370.967	-0.0887655	0.0984052	-0.902041	0.367035	0.601243
PA14_00420	13.205	0.352686	0.737234	0.47839	0.632373	0.815798
PA14_00430	1157.71	-0.0518768	0.0666974	-0.777794	0.43669	0.668862
PA14_00440	1020.67	0.239605	0.0607899	3.94152	8.09665e-05	0.00043172
PA14_00450	728.03	0.125158	0.0860704	1.45413	0.14591	0.332405
PA14_00460	409.203	-0.149135	0.0974092	-1.53102	0.125765	0.295881
PA14_00470	9677.01	0.237236	0.190491	1.24539	0.212988	0.429604
PA14_00480	1669.86	0.12277	0.0628113	1.95458	0.0506325	0.147436
PA14_00490	709.65	-0.0812622	0.0752626	-1.07972	0.280269	0.512728
PA14_00510	5200.34	-0.124479	0.040936	-3.04082	0.00235936	0.0100529
PA14_00520	7934.38	0.00276086	0.0519071	0.0531885	0.957582	0.982452
PA14_00530	252.943	-0.333314	0.109317	-3.04905	0.00229563	0.0098108
PA14_00550	1463.66	0.0429169	0.0691441	0.620687	0.534806	0.750948
PA14_00560	2416.73	-0.21124	0.0577992	-3.65472	0.000257459	0.00127363
PA14_00570	2086.65	0.119091	0.0513085	2.32108	0.0202823	0.0689089
PA14_00580	2107.71	0.354664	0.0559291	6.34131	2.2782e-10	1.98001e-09
PA14_00590	1949.78	0.16087	0.0532601	3.02045	0.00252396	0.0106505
PA14_00600	8589.71	-0.20129	0.06136	-3.28047	0.00103636	0.00470876
PA14_00620	573.681	0.0331974	0.0886494	0.37448	0.708047	0.862155
PA14_00630	3732.68	-0.0700828	0.0513483	-1.36485	0.1723	0.372661
PA14_00640	2198.91	0.0655963	0.0433476	1.51326	0.130213	0.30383
PA14_00650	846.931	0.072607	0.0770004	0.942943	0.34571	0.57965
PA14_00660	1172.45	-0.280371	0.0555136	-5.0505	4.40651e-07	2.99243e-06
PA14_00670	1918.15	0.0458212	0.0515446	0.888963	0.374023	0.608108
PA14_00680	2097.57	-0.147896	0.0545718	-2.71013	0.00672578	0.0259534
PA14_00690	326.417	0.00904694	0.107869	0.0838698	0.93316	0.971266
PA14_00700	1362.51	-0.0207287	0.0929243	-0.223071	0.82348	0.919399
PA14_00710	1969.96	0.232646	0.0548872	4.23862	2.249e-05	0.000127705
PA14_00720	720.58	-0.352168	0.20917	-1.68365	0.0922493	0.236085
PA14_00730	2161.09	0.186494	0.0515112	3.62046	0.000294077	0.00143603
PA14_00740	1385.2	0.233453	0.0603073	3.87105	0.000108366	0.000565615
PA14_00750	1745.24	-0.0388854	0.0567486	-0.685223	0.493203	0.720846
PA14_00760	152.339	0.270065	0.158272	1.70634	0.0879454	0.228674
PA14_00770	1629.9	0.0565224	0.101595	0.55635	0.577972	0.778482
PA14_00780	1486.43	0.229346	0.0546657	4.19544	2.72346e-05	0.000152966
PA14_00790	361.72	-0.346461	0.0978944	-3.53913	0.00040145	0.00191109
PA14_00800	171.915	-0.170964	0.180112	-0.949206	0.342516	0.576505
PA14_00810	13722.3	0.105201	0.0332645	3.16256	0.00156386	0.00689604
PA14_00820	7605.32	0.0066697	0.0543299	0.122763	0.902295	0.956837
PA14_00830	978.036	-0.0754088	0.0748753	-1.00712	0.313875	0.552343
PA14_00850	398.209	0.310908	0.0984534	3.15792	0.00158899	0.00699059
PA14_00860	31.8585	-0.179762	0.318175	-0.564977	0.57209	0.774371
PA14_00875	568.06	-0.0715483	0.0951024	-0.752329	0.451853	0.684524
PA14_00890	1931.66	-0.0411232	0.0628136	-0.654687	0.512669	0.736374
PA14_00900	1808.15	0.0552419	0.0659164	0.838061	0.401997	0.636299
PA14_00910	850.302	-0.059956	0.0865032	-0.693107	0.488242	0.716708
PA14_00925	1614.76	0.13357	0.0904494	1.47674	0.139745	0.320675
PA14_00940	5101.84	0.136914	0.0456982	2.99604	0.00273507	0.0114562
PA14_00960	2683.28	0.0250373	0.044462	0.563117	0.573355	0.775018
PA14_00970	102.096	-0.0537271	0.185373	-0.289832	0.771945	0.892542
PA14_00980	1889.98	0.0646872	0.0564654	1.14561	0.251958	0.477854
PA14_00990	717.748	0.0432771	0.0743369	0.582175	0.560449	0.769168
PA14_01010	237.053	-0.150993	0.132876	-1.13635	0.255811	0.482906
PA14_01020	1251.42	-0.0359704	0.0584418	-0.615491	0.538231	0.752966
PA14_01030	3372.49	-0.219421	0.0428029	-5.1263	2.95491e-07	2.03831e-06
PA14_01040	2994.81	-0.0851675	0.0444486	-1.91609	0.0553534	0.158743
PA14_01060	9.44737	0.162202	0.567125	0.286007	0.774873	0.894108
PA14_01070	823.733	0.0167838	0.0780853	0.214941	0.829813	0.921315
PA14_01080	2211.03	-0.01275	0.0565417	-0.225498	0.821592	0.919367
PA14_01100	4807.78	0.0941135	0.0678508	1.38706	0.165422	0.362335
PA14_01110	856.12	-0.0416899	0.0728522	-0.572254	0.56715	0.772601
PA14_01120	700.133	0.0308756	0.128871	0.239586	0.810651	0.913556
PA14_01130	1036.02	0.0663617	0.0779884	0.850917	0.394815	0.629399
PA14_01140	4258.11	0.00731055	0.0501167	0.14587	0.884024	0.948969
PA14_01150	803.411	0.702424	0.0655809	10.7108	9.05761e-27	1.43408e-25
PA14_01160	12373.4	0.0118347	0.0379829	0.311579	0.755361	0.884158
PA14_01170	2791.01	0.449707	0.0637785	7.05108	1.77532e-12	1.73681e-11
PA14_01180	166.545	-0.104097	0.159158	-0.654051	0.513079	0.736374
PA14_01190	1065.52	0.299795	0.0621835	4.82114	1.42739e-06	9.17792e-06
PA14_01200	510.593	-0.217049	0.0933673	-2.32468	0.020089	0.0684156
PA14_01220	5911.46	0.0983061	0.0502417	1.95666	0.050387	0.146872
PA14_01230	485.165	-0.23312	0.0827157	-2.81832	0.00482752	0.0192694
PA14_01240	1091.59	0.0850369	0.0579225	1.46811	0.142073	0.325492
PA14_01250	484.479	-0.0535865	0.087908	-0.609574	0.542144	0.756022
PA14_01270	630.04	0.0787017	0.0839061	0.937974	0.348258	0.582034
PA14_01290	1167.74	-0.0519212	0.0557862	-0.930718	0.351999	0.586047
PA14_01310	1000.26	0.381334	0.0728921	5.23148	1.68155e-07	1.18585e-06
PA14_01320	993.633	-0.0527723	0.0945369	-0.558219	0.576695	0.777498
PA14_01330	2804.03	-0.0441241	0.0458551	-0.96225	0.335924	0.570406
PA14_01340	1810.16	0.403114	0.0711285	5.6674	1.4498e-08	1.08716e-07
PA14_01350	930.98	0.148599	0.0656936	2.26199	0.0236977	0.0786328
PA14_01360	2082.65	-0.00975154	0.0482871	-0.201949	0.839956	0.925789
PA14_01380	2040.5	0.0147667	0.0658325	0.224306	0.822519	0.919367
PA14_01390	1497.85	-0.0430697	0.0577122	-0.746284	0.455496	0.68693
PA14_01400	933.047	-0.000837057	0.0641656	-0.0130452	0.989592	0.994667
PA14_01410	960.149	0.102528	0.0686815	1.49281	0.135487	0.313435
PA14_01430	3491.51	0.0327278	0.042527	0.769578	0.44155	0.673403
PA14_01440	3700.43	-0.0263664	0.0451367	-0.584146	0.559122	0.768504
PA14_01460	1277.87	0.052534	0.0673718	0.779762	0.435531	0.667318
PA14_01470	3603.06	-0.293704	0.0493302	-5.95383	2.61945e-09	2.09114e-08
PA14_01480	973.768	0.206348	0.114203	1.80685	0.0707856	0.19251
PA14_01490	1050.84	0.274448	0.0682993	4.01832	5.86154e-05	0.000317003
PA14_01500	3040.93	-0.0118894	0.0442557	-0.268653	0.788197	0.899395
PA14_01510	4241.68	0.37847	0.048094	7.8694	3.56352e-15	3.9178e-14
PA14_01520	746.047	0.0459829	0.0636392	0.722555	0.469953	0.700524
PA14_01540	1873.68	0.0594986	0.059874	0.993729	0.320355	0.556509
PA14_01550	388.593	-0.462718	0.0972177	-4.7596	1.93976e-06	1.23329e-05
PA14_01580	227.044	0.222116	0.119759	1.8547	0.063639	0.177055
PA14_01600	686.265	-2.10906	0.0841223	-25.0713	1.02281e-138	6.68234e-137
PA14_01610	228.131	0.0839919	0.129237	0.649904	0.515754	0.737895
PA14_01620	1867.51	-0.00245845	0.0516811	-0.0475695	0.962059	0.984223
PA14_01640	47.9981	-0.238206	0.302298	-0.787985	0.430706	0.662373
PA14_01660	92.9072	-0.106391	0.193195	-0.550692	0.581845	0.781095
PA14_01670	278.981	-0.0223876	0.119563	-0.187245	0.851468	0.93072
PA14_01680	1014.76	0.0080157	0.0613466	0.130662	0.896042	0.952695
PA14_01690	1184.99	0.104599	0.0727642	1.43751	0.150573	0.338819
PA14_01710	3278.83	-0.136387	0.043549	-3.13181	0.00173735	0.00760793
PA14_01720	4467.62	0.018997	0.130996	0.14502	0.884695	0.949216
PA14_01730	1312.23	-0.0413862	0.0603438	-0.685841	0.492813	0.720581
PA14_01750	735.778	1.12387	0.073365	15.3189	5.72e-53	1.46453e-51
PA14_01760	5.67035	0.750796	0.728034	1.03127	0.302416	0.53902
PA14_01770	18165.4	-0.000874866	0.042674	-0.0205011	0.983644	0.992726
PA14_01780	558.27	0.00693812	0.0848662	0.0817536	0.934843	0.971923
PA14_01790	683.632	0.530821	0.094337	5.62686	1.8352e-08	1.37074e-07
PA14_01800	954.378	-0.102303	0.0663322	-1.54229	0.123004	0.291557
PA14_01810	3139.26	0.0890791	0.0497459	1.79068	0.0733443	0.198424
PA14_01830	1090.63	-0.15251	0.0681008	-2.23948	0.0251247	0.0826917
PA14_01840	875.234	0.282752	0.0642753	4.39907	1.08716e-05	6.4102e-05
PA14_01860	1694.99	0.232765	0.0637852	3.6492	0.000263056	0.0012968
PA14_01870	1296.91	-0.0957231	0.0686396	-1.39458	0.163144	0.358588
PA14_01890	2599.63	0.024713	0.0491771	0.50253	0.615294	0.805098
PA14_01910	924.405	0.079041	0.0660532	1.19663	0.231452	0.453803
PA14_01930	1978.68	0.0290035	0.0539289	0.537809	0.590709	0.78668
PA14_01940	414.551	0.00765734	0.0904713	0.0846383	0.932549	0.971048
PA14_01960	337.412	0.0829096	0.109136	0.759687	0.447441	0.67947
PA14_01970	915.873	-0.0958013	0.086885	-1.10262	0.270191	0.499274
PA14_01980	2928.48	0.0957464	0.0449307	2.13098	0.0330909	0.103917
PA14_01990	545.929	0.0039958	0.089614	0.044589	0.964435	0.985546
PA14_02010	2666.22	0.442117	0.0454965	9.71761	2.53661e-22	3.47424e-21
PA14_02020	1202.19	0.0597081	0.0611265	0.976797	0.32867	0.563903
PA14_02030	977.272	-0.0119399	0.0875894	-0.136316	0.891571	0.951069
PA14_02060	210.407	0.169724	0.126473	1.34198	0.179604	0.382634
PA14_02070	3651.31	0.0817147	0.0582631	1.40251	0.160762	0.355001
PA14_02090	2136.99	0.165984	0.0517049	3.21021	0.00132639	0.00595293
PA14_02100	2737.28	-0.223668	0.0495499	-4.514	6.36177e-06	3.83054e-05
PA14_02110	0.58373	2.71075	2.93355	0.924051	0.35546	0.589219
PA14_02130	1108.85	-0.0626498	0.0618798	-1.01244	0.311326	0.550071
PA14_02140	2572.62	0.0588586	0.0498762	1.18009	0.237963	0.460218
PA14_02150	1498.83	-0.0987199	0.0643832	-1.53332	0.125198	0.295035
PA14_02180	4608.58	0.170992	0.0541231	3.15931	0.00158141	0.00696802
PA14_02190	1256.7	-0.0401785	0.0697102	-0.576366	0.564368	0.770196
PA14_02200	3137.57	0.0187515	0.0514077	0.364759	0.715291	0.865473
PA14_02220	516.243	-0.0328936	0.0875902	-0.37554	0.707259	0.861749
PA14_02230	4341.78	0.0754019	0.0736922	1.0232	0.306213	0.543912
PA14_02250	1492.38	-0.125244	0.0771975	-1.62238	0.104722	0.259591
PA14_02260	65.0742	0.0646438	0.208591	0.309906	0.756632	0.885282
PA14_02270	527.885	0.163621	0.0785356	2.0834	0.0372151	0.114403
PA14_02290	407.104	-0.0100193	0.0860401	-0.116449	0.907297	0.958698
PA14_02300	412.402	0.0967454	0.108684	0.890156	0.373382	0.607588
PA14_02310	424.124	-0.0274129	0.0985306	-0.278217	0.780846	0.896547
PA14_02330	2293.9	0.0217713	0.0450353	0.483428	0.628792	0.81395
PA14_02340	107.367	-0.189232	0.165429	-1.14389	0.252671	0.478483
PA14_02360	781.474	0.419234	0.0737832	5.68197	1.3315e-08	1.00374e-07
PA14_02370	516.645	0.0846092	0.087495	0.967018	0.333535	0.56863
PA14_02380	1202.04	0.0177605	0.0642146	0.27658	0.782103	0.896547
PA14_02390	174.754	-0.0477755	0.151431	-0.315493	0.752388	0.88286
PA14_02410	1656.67	-0.0198375	0.0668861	-0.296586	0.766782	0.890012
PA14_02420	859.187	0.903563	0.0698091	12.9433	2.56219e-38	5.05676e-37
PA14_02450	2920.97	0.166709	0.0423032	3.94081	8.12057e-05	0.00043259
PA14_02460	2978.9	0.223294	0.0529976	4.21328	2.51686e-05	0.000142064
PA14_02470	1427.14	-0.198789	0.0616305	-3.22549	0.00125756	0.005673
PA14_02490	2694.87	0.474104	0.0831369	5.70268	1.17935e-08	8.93793e-08
PA14_02500	252.559	0.0287977	0.126917	0.226902	0.8205	0.919367
PA14_02510	2193.33	0.0986843	0.0536388	1.83979	0.0657985	0.181465
PA14_02520	319.729	0.219313	0.117616	1.86465	0.062231	0.174247
PA14_02530	69.4535	0.206046	0.207403	0.993457	0.320487	0.556568
PA14_02550	1128.44	0.39619	0.0612258	6.47096	9.73797e-11	8.60818e-10
PA14_02560	4280.31	0.274024	0.0474988	5.76908	7.97045e-09	6.14708e-08
PA14_02570	153.372	-0.294205	0.151688	-1.93954	0.0524361	0.151987
PA14_02580	83.7008	-0.295019	0.199946	-1.47549	0.140081	0.321186
PA14_02590	283.278	-0.0353616	0.10185	-0.347194	0.728446	0.872783
PA14_02610	679.881	-0.00341668	0.0950502	-0.035946	0.971325	0.987247
PA14_02620	265.224	-0.159629	0.133477	-1.19593	0.231723	0.454048
PA14_02630	775.881	-0.0276425	0.0702888	-0.39327	0.69412	0.856242
PA14_02640	946.712	-0.0494193	0.0783807	-0.630503	0.528366	0.746701
PA14_02650	138.202	0.263142	0.152728	1.72294	0.0848985	0.222584
PA14_02660	1549.56	-0.0660345	0.0520449	-1.2688	0.204514	0.417699
PA14_02680	369.894	-0.183735	0.105429	-1.74273	0.0813813	0.21545
PA14_02690	782.33	0.0278508	0.077672	0.35857	0.719917	0.867281
PA14_02700	524.455	-0.0849065	0.0882663	-0.961936	0.336082	0.570406
PA14_02720	3797.72	0.0723388	0.0482508	1.49922	0.133815	0.310325
PA14_02730	1371.14	-0.153721	0.0625191	-2.45878	0.0139411	0.0496188
PA14_02740	239.576	1.04559	0.146941	7.11571	1.1134e-12	1.10062e-11
PA14_02750	4279.46	-0.0422014	0.0440588	-0.957842	0.338142	0.572365
PA14_02760	2021.75	-0.0271279	0.047443	-0.571799	0.567458	0.772601
PA14_02770	1200.01	0.0585336	0.0652936	0.896469	0.370003	0.604211
PA14_02790	1079.54	0.0509263	0.0722564	0.7048	0.480934	0.711513
PA14_02810	1012.81	-0.00583851	0.083668	-0.0697818	0.944367	0.976472
PA14_02830	1046.42	-0.0188927	0.0595346	-0.317341	0.750985	0.881578
PA14_02840	2426.01	0.0648371	0.057666	1.12436	0.260862	0.488131
PA14_02850	2212.56	-0.0544725	0.0473974	-1.14927	0.250443	0.475923
PA14_02870	1354.54	0.00698215	0.0581619	0.120047	0.904446	0.957529
PA14_02890	1461.72	-0.151247	0.0614684	-2.46056	0.0138719	0.0494343
PA14_02900	1716.91	-0.0246514	0.0533236	-0.462299	0.643867	0.822887
PA14_02910	394.132	0.0661234	0.104051	0.635488	0.52511	0.744319
PA14_02930	8275.03	0.150658	0.0632756	2.38098	0.0172666	0.0598436
PA14_02960	107.861	0.0839598	0.204126	0.411313	0.680843	0.846994
PA14_02970	801.385	0.0214668	0.0712075	0.301469	0.763057	0.887319
PA14_02980	636.439	0.0646461	0.077445	0.834735	0.403867	0.63753
PA14_02990	1301.11	0.0440283	0.0886236	0.496801	0.619329	0.807401
PA14_03000	1059.56	-0.30465	0.0577561	-5.27477	1.32923e-07	9.39718e-07
PA14_03010	3204.83	-0.0197883	0.0424458	-0.466201	0.641072	0.820687
PA14_03020	234.583	0.000436641	0.130466	0.00334678	0.99733	0.998735
PA14_03030	343.117	-0.0466647	0.115839	-0.40284	0.687066	0.850803
PA14_03050	1008.53	-0.128634	0.0691513	-1.86018	0.0628602	0.175232
PA14_03070	241.714	-0.0523386	0.126145	-0.414909	0.678209	0.845938
PA14_03080	250.483	-0.102036	0.136721	-0.746311	0.45548	0.68693
PA14_03090	582.87	0.0296592	0.0775397	0.382504	0.702088	0.858947
PA14_03100	250.193	0.442306	0.118485	3.73303	0.00018919	0.000960934
PA14_03110	2208.98	-0.0468982	0.0628344	-0.746378	0.455439	0.68693
PA14_03120	5558.68	0.0579053	0.0589394	0.982455	0.325876	0.562319
PA14_03130	576.058	0.0509441	0.0837886	0.608008	0.543182	0.75701
PA14_03150	1148.64	0.113597	0.0643929	1.76413	0.0777101	0.207861
PA14_03160	1567.39	0.0788703	0.0584615	1.3491	0.177306	0.379874
PA14_03163	426.989	-0.252036	0.114079	-2.2093	0.0271536	0.0884978
PA14_03166	502.138	0.0632714	0.0783302	0.807752	0.419233	0.649829
PA14_03170	2940.72	-0.049669	0.0439804	-1.12934	0.258754	0.48585
PA14_03180	756.447	-0.122232	0.0683008	-1.78962	0.0735149	0.1987
PA14_03190	1569.44	-0.00683262	0.0755416	-0.0904484	0.927931	0.969373
PA14_03200	20.5457	-0.140884	0.501435	-0.280961	0.77874	0.895843
PA14_03210	757.656	-0.0579026	0.068302	-0.847745	0.39658	0.631064
PA14_03220	1090.82	-0.0354306	0.0726618	-0.48761	0.625826	0.811774
PA14_03240	100.55	0.131812	0.201674	0.653589	0.513377	0.736505
PA14_03250	330.323	-0.150216	0.113235	-1.32658	0.184647	0.389126
PA14_03265	4085.36	0.0814425	0.0545713	1.49241	0.135593	0.313466
PA14_03270	606.139	0.0291855	0.0876658	0.332918	0.739196	0.877521
PA14_03285	1983.23	0.796223	0.0723295	11.0083	3.48578e-28	5.79333e-27
PA14_03290	1690.77	-0.0336776	0.0663942	-0.507237	0.611989	0.803173
PA14_03300	6436.74	0.139618	0.0518108	2.69477	0.0070437	0.0269605
PA14_03310	1070.8	-0.0313783	0.0612883	-0.511978	0.608666	0.800662
PA14_03320	3169.7	0.0208687	0.0632595	0.329891	0.741482	0.878358
PA14_03330	25.7535	-0.289472	0.36835	-0.785862	0.431949	0.663925
PA14_03340	742.166	0.0254424	0.0766396	0.331974	0.739909	0.877605
PA14_03350	4601.36	0.525262	0.0554836	9.46697	2.8807e-21	3.79905e-20
PA14_03360	113.079	-0.117361	0.17265	-0.679763	0.496654	0.72387
PA14_03370	89.5831	-0.0940934	0.238476	-0.394562	0.693166	0.855954
PA14_03380	500.045	0.349961	0.0762577	4.5892	4.44956e-06	2.71658e-05
PA14_03390	417.895	-0.0335861	0.0916931	-0.366288	0.71415	0.865368
PA14_03400	374.064	-0.134523	0.106369	-1.26468	0.205986	0.41935
PA14_03410	531.718	-8.7321	0.461946	-18.9029	1.07998e-79	3.74305e-78
PA14_03420	2368.45	-0.0383851	0.0551518	-0.695989	0.486436	0.715903
PA14_03430	30.0771	-0.377537	0.320036	-1.17967	0.238131	0.460387
PA14_03450	4655.21	-0.0703037	0.0463367	-1.51723	0.129208	0.302124
PA14_03470	1.53422	0.37214	1.52102	0.244664	0.806716	0.911567
PA14_03480	496.636	-0.0447065	0.0976434	-0.457854	0.647057	0.82482
PA14_03490	246.475	0.141825	0.162215	0.874298	0.381956	0.616247
PA14_03510	5498.2	0.101106	0.0656383	1.54035	0.123474	0.292428
PA14_03520	1151.14	0.170032	0.0632654	2.68761	0.00719662	0.0274903
PA14_03530	4358.38	0.0875424	0.0437522	2.00087	0.0454068	0.13534
PA14_03550	1180.53	0.159101	0.0629914	2.52576	0.0115449	0.042038
PA14_03560	247.7	-0.348275	0.123968	-2.80939	0.00496349	0.0197566
PA14_03580	919.939	0.020126	0.0675757	0.29783	0.765833	0.889274
PA14_03590	1229.8	0.000457906	0.056282	0.00813593	0.993509	0.997153
PA14_03610	842.664	0.777052	0.0767174	10.1288	4.11858e-24	6.0335e-23
PA14_03620	2069.64	-1.63293	0.0584107	-27.956	5.56719e-172	5.10386e-170
PA14_03630	719.236	0.094818	0.0793006	1.19568	0.231822	0.454058
PA14_03650	3554.63	0.0364145	0.0505978	0.719685	0.471719	0.702266
PA14_03670	996.489	-0.0475904	0.0587247	-0.8104	0.417711	0.648236
PA14_03680	1359.97	-0.109399	0.068194	-1.60424	0.108662	0.266256
PA14_03700	1243.47	0.576883	0.0894479	6.44938	1.12311e-10	9.89726e-10
PA14_03710	2271.57	0.0125655	0.0566067	0.221978	0.824331	0.919446
PA14_03720	222.832	0.0887175	0.133067	0.666711	0.504957	0.730324
PA14_03730	65.4026	-2.85407	0.278221	-10.2583	1.08604e-24	1.62022e-23
PA14_03760	501.059	-1.01437	0.0845331	-11.9997	3.5646e-33	6.51485e-32
PA14_03770	239.357	-1.3998	0.136987	-10.2185	1.63883e-24	2.4258e-23
PA14_03780	2827.51	0.0520604	0.0522003	0.99732	0.318609	0.554833
PA14_03790	31.4738	-0.111965	0.292133	-0.383267	0.701522	0.858809
PA14_03800	966.407	-0.00937498	0.0732713	-0.127949	0.898189	0.954085
PA14_03810	1818.74	-0.0569051	0.0559612	-1.01687	0.309217	0.547365
PA14_03830	996.01	-0.250462	0.078618	-3.18581	0.00144351	0.0064014
PA14_03840	284.413	0.635341	0.124573	5.10015	3.39387e-07	2.32419e-06
PA14_03855	681.744	-0.0909765	0.0909541	-1.00025	0.317191	0.553844
PA14_03860	1536.26	0.185917	0.0754624	2.4637	0.0137511	0.0490961
PA14_03870	421.089	0.204636	0.0959822	2.13202	0.033005	0.103704
PA14_03880	3994.58	0.0814683	0.0527923	1.54318	0.122786	0.291203
PA14_03900	265.388	0.115122	0.121058	0.950967	0.341621	0.576023
PA14_03920	1762.62	0.0147068	0.0582458	0.252496	0.800658	0.907828
PA14_03930	2743.08	-0.103572	0.0485285	-2.13426	0.0328217	0.103185
PA14_03940	386.679	-0.023866	0.106871	-0.223316	0.823289	0.919367
PA14_03950	2187.95	-0.0819626	0.0492891	-1.6629	0.0963332	0.243792
PA14_03960	2717.22	0.147784	0.0483584	3.05601	0.00224305	0.00960776
PA14_03980	5405.75	0.0301713	0.0537323	0.561512	0.574449	0.775745
PA14_04000	43.5286	-0.0578242	0.27725	-0.208563	0.834789	0.923132
PA14_04010	791.661	-0.0341644	0.0797737	-0.428266	0.668458	0.839568
PA14_04020	9.28256	-0.868248	0.671219	-1.29354	0.195825	0.405808
PA14_04030	2296.54	0.0739335	0.0440831	1.67714	0.0935151	0.238444
PA14_04040	2227.95	0.214285	0.0502229	4.26668	1.98402e-05	0.000114018
PA14_04050	3176.76	0.185224	0.0477978	3.87515	0.000106559	0.000557203
PA14_04060	124.075	0.463436	0.181792	2.54927	0.010795	0.0395609
PA14_04070	944.909	0.062413	0.0835385	0.747118	0.454993	0.6869
PA14_04080	5586.32	0.0617157	0.0507606	1.21582	0.224054	0.443583
PA14_04090	226.472	0.0697481	0.117549	0.593353	0.552945	0.764491
PA14_04100	789.996	-0.0210752	0.0663879	-0.317455	0.750898	0.881578
PA14_04110	761.816	-0.0256576	0.0891658	-0.287751	0.773537	0.893574
PA14_04140	4521.36	-0.0882842	0.0411862	-2.14354	0.0320698	0.101157
PA14_04150	1814.27	0.0233035	0.0842563	0.276578	0.782104	0.896547
PA14_04180	18.1008	-0.735963	0.457239	-1.60958	0.107489	0.264373
PA14_04190	1521.07	-0.085539	0.0531724	-1.60871	0.107679	0.264727
PA14_04210	405.58	-0.0269091	0.124347	-0.216404	0.828673	0.920976
PA14_04220	3082.34	0.0715242	0.0452911	1.57921	0.114288	0.277037
PA14_04230	4782.01	0.0239822	0.0448164	0.535122	0.592565	0.78822
PA14_04240	1899.89	0.374911	0.0665233	5.63578	1.74271e-08	1.30337e-07
PA14_04250	618.465	0.0853474	0.0919432	0.928262	0.353272	0.587477
PA14_04270	1924.73	0.492474	0.070237	7.0116	2.35605e-12	2.26595e-11
PA14_04290	208.423	0.0513987	0.121283	0.423792	0.671717	0.841535
PA14_04300	2123.16	0.0502995	0.0465558	1.08041	0.279959	0.512546
PA14_04310	2660.81	-4.24824	0.0722367	-58.8099	0	0
PA14_04320	1463.29	0.0921953	0.0644411	1.43069	0.152519	0.34144
PA14_04330	104.589	0.0956983	0.201641	0.474597	0.635075	0.816378
PA14_04340	972.898	0.0801596	0.0873605	0.917573	0.358842	0.593725
PA14_04350	924.585	-0.038334	0.0723918	-0.529535	0.596434	0.790425
PA14_04370	2648.27	-0.0431529	0.0593253	-0.727395	0.466984	0.698408
PA14_04380	47.6456	-0.505356	0.306914	-1.64657	0.0996459	0.24962
PA14_04390	3786.64	-0.154978	0.0398327	-3.89073	9.99437e-05	0.000525514
PA14_04410	606.545	-0.109336	0.0956043	-1.14363	0.252778	0.478483
PA14_04420	1246.39	-0.0199156	0.0601334	-0.33119	0.740501	0.877608
PA14_04430	38.609	0.131146	0.299167	0.438371	0.661117	0.835525
PA14_04440	150.198	0.539346	0.177269	3.04254	0.00234594	0.0100183
PA14_04460	1885.8	0.011673	0.057171	0.204176	0.838216	0.92477
PA14_04480	48.8904	0.554331	0.258742	2.14241	0.0321608	0.101331
PA14_04490	1026.71	1.86025e-06	0.0728551	2.55336e-05	0.99998	0.99998
PA14_04510	1025.55	0.0913911	0.0665809	1.37263	0.169867	0.369366
PA14_04520	106.725	0.0207864	0.19141	0.108596	0.913523	0.962096
PA14_04530	197.447	-0.094514	0.131315	-0.71975	0.471679	0.702266
PA14_04550	589.97	-0.199301	0.0812942	-2.4516	0.0142224	0.0505565
PA14_04560	4045.11	0.14742	0.0395744	3.72514	0.000195205	0.000986263
PA14_04570	1399.84	0.00168264	0.0688986	0.024422	0.980516	0.992565
PA14_04590	2318.83	0.0694104	0.076467	0.907718	0.364027	0.59767
PA14_04610	925.663	-0.0560964	0.067434	-0.83187	0.405482	0.639106
PA14_04630	355.121	-0.212372	0.110058	-1.92965	0.0536506	0.154644
PA14_04640	4043.72	-0.0020682	0.135616	-0.0152504	0.987832	0.993523
PA14_04650	247.738	0.394256	0.116768	3.3764	0.000734424	0.00340495
PA14_04660	274.74	0.00688169	0.109637	0.0627681	0.949951	0.978221
PA14_04670	30.2863	0.0494238	0.321219	0.153863	0.877717	0.946669
PA14_04690	37.6325	0.158739	0.299424	0.530149	0.596009	0.790372
PA14_04700	654.899	-0.0393191	0.0788902	-0.498402	0.618201	0.80631
PA14_04710	543.482	-0.0336324	0.0860425	-0.390882	0.695885	0.85719
PA14_04730	2836.74	0.316265	0.0449047	7.04303	1.88101e-12	1.8339e-11
PA14_04750	223.901	-5.45559	0.251099	-21.7268	1.14505e-104	5.29145e-103
PA14_04760	241.649	-2.70332	0.13253	-20.3978	1.74763e-92	7.09538e-91
PA14_04780	447.149	-0.00575665	0.103115	-0.0558274	0.955479	0.9812
PA14_04790	2224.29	0.0519929	0.0475388	1.09369	0.274089	0.504182
PA14_04810	3857.5	-0.0628103	0.0470492	-1.33499	0.181878	0.385251
PA14_04820	2526.19	-0.00593212	0.0496001	-0.119599	0.904801	0.957529
PA14_04830	2604.12	0.0511735	0.0669138	0.764767	0.44441	0.676132
PA14_04860	1687.41	-0.0739272	0.063285	-1.16816	0.242741	0.465813
PA14_04870	698.367	-0.260167	0.0807821	-3.2206	0.00127924	0.00575708
PA14_04900	72.9726	-5.55879	0.454804	-12.2224	2.36035e-34	4.39876e-33
PA14_04910	2005.59	0.180944	0.0477578	3.78879	0.000151382	0.000775884
PA14_04920	6.50073	-0.649848	0.7646	-0.849919	0.39537	0.629668
PA14_04940	2586.1	-0.0024129	0.0660098	-0.0365537	0.970841	0.987247
PA14_04950	39.7476	0.187285	0.304403	0.615251	0.538389	0.753002
PA14_04960	15.6841	-0.460792	0.42786	-1.07697	0.281494	0.514535
PA14_04970	1652.19	0.293482	0.192564	1.52408	0.127489	0.299441
PA14_04980	623.643	0.0192672	0.10036	0.19198	0.847758	0.929481
PA14_05000	593.013	0.163936	0.0839928	1.95179	0.0509632	0.148323
PA14_05010	921.873	0.0897844	0.0729644	1.23052	0.218501	0.435928
PA14_05020	2656.36	0.0796798	0.048665	1.63731	0.101565	0.253257
PA14_05030	0.377822	-2.00587	2.98566	-0.671834	0.501689	0.727821
PA14_05040	465.839	-0.0540988	0.0947016	-0.571255	0.567827	0.772601
PA14_05050	1982.77	0.00427889	0.0830875	0.0514986	0.958928	0.982923
PA14_05060	2095.53	0.06122	0.0536005	1.14215	0.25339	0.479132
PA14_05070	4108.79	-0.048735	0.0489346	-0.99592	0.319289	0.555315
PA14_05080	509.086	-0.082699	0.096267	-0.859059	0.390308	0.625285
PA14_05110	820.232	0.0231228	0.0726305	0.318362	0.75021	0.881265
PA14_05120	492.562	0.115472	0.092942	1.24241	0.214084	0.430938
PA14_05130	2061.69	-0.0489537	0.072126	-0.678725	0.497312	0.724244
PA14_05150	887.454	0.033869	0.0672572	0.503574	0.61456	0.805098
PA14_05160	1590.97	-0.311013	0.0539142	-5.76867	7.9901e-09	6.15389e-08
PA14_05180	464.29	-0.0324159	0.0896099	-0.361744	0.717543	0.866152
PA14_05190	4178.58	0.007557	0.0466253	0.162079	0.871243	0.943042
PA14_05200	1332.61	0.0154388	0.0589516	0.26189	0.793407	0.902305
PA14_05210	721.044	0.0235936	0.0798918	0.29532	0.767749	0.890528
PA14_05220	786.738	0.0556671	0.0911042	0.611027	0.541181	0.755627
PA14_05230	4444.71	0.0688497	0.0470212	1.46422	0.143133	0.326733
PA14_05250	1201.72	0.0958827	0.0615474	1.55787	0.119264	0.28519
PA14_05260	517.799	-1.40982	0.0851908	-16.5489	1.62986e-61	4.60901e-60
PA14_05270	1228.12	0.0241373	0.07279	0.331603	0.740189	0.877605
PA14_05280	4133.16	1.00132	0.0499354	20.0522	1.9294e-89	7.56326e-88
PA14_05290	243.358	-3.07117	0.165068	-18.6055	2.90152e-77	9.75872e-76
PA14_05300	477.718	0.230732	0.0974101	2.36866	0.0178525	0.0617612
PA14_05310	180.723	-0.0890994	0.178373	-0.49951	0.61742	0.805871
PA14_05320	3330.04	-0.145922	0.0478224	-3.05133	0.00227826	0.00974391
PA14_05330	2935.21	0.111002	0.0635221	1.74746	0.0805576	0.213776
PA14_05340	170.443	-0.00173228	0.178786	-0.00968914	0.992269	0.996301
PA14_05360	608.972	-0.0204944	0.0724213	-0.282989	0.777185	0.895429
PA14_05380	801.793	-0.127225	0.0741679	-1.71536	0.0862786	0.225472
PA14_05390	2300.15	0.100988	0.0454843	2.22028	0.0263998	0.0862394
PA14_05400	2742.98	0.18024	0.0427089	4.22019	2.44093e-05	0.00013819
PA14_05410	414.969	-1.10793	0.119454	-9.27493	1.77741e-20	2.2703e-19
PA14_05420	1036.31	0.0395116	0.0693586	0.569672	0.568901	0.773173
PA14_05430	41.4203	-0.680217	0.30026	-2.26543	0.0234865	0.0782058
PA14_05440	348.152	0.491741	0.125986	3.90315	9.4949e-05	0.000499713
PA14_05460	511.456	-0.00636	0.083117	-0.0765186	0.939006	0.974113
PA14_05480	1761.33	0.0194628	0.0550393	0.353617	0.723626	0.869391
PA14_05510	921.644	-0.0301278	0.0650439	-0.463192	0.643227	0.822563
PA14_05520	4456.08	0.129466	0.0420274	3.08051	0.0020665	0.00889172
PA14_05530	712.661	-0.745539	0.0728914	-10.2281	1.48439e-24	2.20295e-23
PA14_05540	290.011	-0.382188	0.13432	-2.84536	0.00443618	0.0179
PA14_05550	52.7998	-0.262718	0.231237	-1.13614	0.255897	0.482908
PA14_05560	2.84378	-1.61698	1.12303	-1.43984	0.149914	0.337603
PA14_05580	983.429	0.149521	0.0700142	2.13558	0.0327138	0.102903
PA14_05590	5930.72	0.0714624	0.0461377	1.54889	0.121407	0.288978
PA14_05600	999.137	0.0510143	0.0859509	0.593529	0.552827	0.764491
PA14_05620	603.237	-0.509236	0.0752032	-6.77147	1.27482e-11	1.18206e-10
PA14_05630	1533.6	0.0447865	0.0614538	0.728784	0.466134	0.697605
PA14_05650	970.549	-0.00309499	0.0726855	-0.0425805	0.966036	0.986251
PA14_05660	1365.18	0.651672	0.063817	10.2116	1.75974e-24	2.59802e-23
PA14_05690	1806.06	0.00739606	0.0570684	0.1296	0.896883	0.953054
PA14_05700	2478.78	-0.00187123	0.0446872	-0.0418739	0.966599	0.986251
PA14_05740	1049.43	-0.121429	0.0750654	-1.61764	0.10574	0.261656
PA14_05750	597.644	0.000707309	0.0887882	0.00796625	0.993644	0.997153
PA14_05770	1562.96	0.0877414	0.0632813	1.38653	0.165585	0.362413
PA14_05775	287.032	-0.0590839	0.131007	-0.450998	0.651991	0.828319
PA14_05790	1079.47	0.0798879	0.0690789	1.15647	0.247488	0.472212
PA14_05810	172.69	-0.131033	0.140544	-0.932327	0.351168	0.585176
PA14_05820	62.1864	-0.756576	0.219924	-3.44017	0.000581355	0.00271745
PA14_05840	3673.65	-0.0656349	0.0617583	-1.06277	0.287887	0.522795
PA14_05850	726.448	-0.0171748	0.079785	-0.215263	0.829562	0.921315
PA14_05860	1119.24	0.0703206	0.0588669	1.19457	0.232255	0.454281
PA14_05870	244.145	-0.530655	0.145169	-3.65542	0.000256762	0.00127239
PA14_05880	1207.52	0.0246147	0.053508	0.46002	0.645502	0.823886
PA14_05890	2630.31	-0.0317429	0.0560116	-0.56672	0.570904	0.774098
PA14_05910	409.045	-0.109285	0.100986	-1.08217	0.279175	0.511993
PA14_05920	30.834	-5.301	0.667251	-7.94454	1.94906e-15	2.16376e-14
PA14_05950	220.545	-0.0261106	0.114525	-0.22799	0.819654	0.919281
PA14_05960	569.929	1.07899	0.0968211	11.1442	7.6464e-29	1.30126e-27
PA14_05970	400.803	0.052353	0.0904314	0.578925	0.56264	0.769847
PA14_05990	689.469	0.237526	0.0700527	3.39067	0.000697209	0.00323769
PA14_06010	13.3115	0.266081	0.653034	0.407453	0.683675	0.849314
PA14_06030	1738.86	-0.206961	0.0641202	-3.22771	0.00124787	0.00563375
PA14_06040	424.588	-0.149972	0.112987	-1.32733	0.184398	0.389057
PA14_06060	1023.83	-0.0843422	0.0667042	-1.26442	0.206079	0.419389
PA14_06070	2531.53	0.152017	0.0511479	2.9721	0.00295773	0.0122893
PA14_06080	509.667	0.117817	0.0970476	1.21402	0.224741	0.444478
PA14_06090	74.2059	0.0704193	0.214225	0.328716	0.74237	0.878358
PA14_06120	652.868	-0.0179611	0.0775785	-0.231521	0.81691	0.917651
PA14_06130	714.28	-0.0743365	0.0704019	-1.05589	0.29102	0.525796
PA14_06150	3243.34	-0.0124032	0.0415695	-0.298372	0.76542	0.889157
PA14_06160	2893.71	0.0209703	0.0567476	0.369536	0.711728	0.863677
PA14_06170	1131.01	0.0483595	0.0744143	0.649868	0.515778	0.737895
PA14_06180	28.4537	-0.508539	0.326094	-1.55949	0.118881	0.284514
PA14_06190	735.506	0.00788436	0.0749631	0.105177	0.916236	0.962996
PA14_06200	1308	-0.939493	0.0552119	-17.0161	6.23607e-65	1.8271e-63
PA14_06210	1071.95	-0.0927354	0.0699147	-1.32641	0.184705	0.389126
PA14_06230	501.37	0.0192789	0.0871795	0.22114	0.824983	0.919788
PA14_06240	1033.03	0.092418	0.0624979	1.47874	0.13921	0.319835
PA14_06250	2253.26	-0.0533648	0.0563401	-0.947189	0.343542	0.577379
PA14_06260	1106.72	-0.125512	0.0727973	-1.72413	0.0846842	0.222227
PA14_06270	2433.43	0.0273713	0.0439453	0.622849	0.533384	0.749993
PA14_06280	1432.04	0.0332941	0.0706589	0.471194	0.637502	0.818329
PA14_06290	1279.36	-0.017007	0.0688847	-0.246891	0.804992	0.9102
PA14_06300	239.254	-0.0462872	0.122461	-0.377975	0.705449	0.861537
PA14_06310	348.199	-0.800319	0.120341	-6.65044	2.92222e-11	2.65334e-10
PA14_06320	800.928	-2.87884	0.0834323	-34.5051	6.72149e-261	1.46942e-258
PA14_06330	442.308	-0.184472	0.0901005	-2.0474	0.0406184	0.123265
PA14_06340	2378.79	0.0814194	0.0537552	1.51463	0.129866	0.303419
PA14_06350	397.229	-0.908577	0.0866207	-10.4891	9.69065e-26	1.49678e-24
PA14_06360	1641.88	0.305165	0.0632813	4.82237	1.41866e-06	9.1321e-06
PA14_06390	1188.46	0.153203	0.0608152	2.51916	0.0117635	0.04267
PA14_06400	640.222	0.00262374	0.0884512	0.0296631	0.976336	0.99045
PA14_06420	5966.41	0.454351	0.0435868	10.424	1.92602e-25	2.93499e-24
PA14_06430	3058.14	0.0621469	0.0463834	1.33985	0.180293	0.383672
PA14_06450	2519.03	0.121059	0.0866877	1.3965	0.162564	0.357729
PA14_06460	2477.1	0.133434	0.0597271	2.23405	0.0254795	0.0835692
PA14_06480	316.109	0.0157562	0.11669	0.135025	0.892592	0.951417
PA14_06500	3366.42	-1.07278	0.0540836	-19.8356	1.46717e-87	5.67304e-86
PA14_06510	3.14498	-2.30345	1.14309	-2.0151	0.0438943	0.131799
PA14_06530	565.175	-0.0221098	0.0823576	-0.268461	0.788344	0.899395
PA14_06540	752.601	-0.906805	0.0723709	-12.53	5.11797e-36	9.86121e-35
PA14_06570	307.136	-0.202345	0.0999775	-2.02391	0.0429794	0.129325
PA14_06580	350.207	0.0471838	0.0985171	0.47894	0.631981	0.815663
PA14_06600	61.1146	-1.3889	0.22122	-6.27835	3.42182e-10	2.92475e-09
PA14_06620	1734.29	0.0379437	0.0506605	0.748981	0.453869	0.685939
PA14_06640	1637.57	0.184578	0.0525083	3.51521	0.000439413	0.00208135
PA14_06650	1015.18	0.240729	0.0663538	3.62796	0.000285674	0.0013998
PA14_06660	549.83	-0.0870655	0.0798642	-1.09017	0.275639	0.506704
PA14_06670	2322.86	-0.108999	0.0488333	-2.23206	0.0256108	0.0839514
PA14_06680	118.656	-0.0248355	0.161328	-0.153944	0.877654	0.946669
PA14_06690	633.272	0.0223697	0.0818777	0.273209	0.784692	0.89787
PA14_06700	215.104	0.223683	0.191126	1.17034	0.241864	0.464915
PA14_06710	1083.31	0.559705	0.0668804	8.36874	5.82355e-17	6.75532e-16
PA14_06720	904.105	-0.0783501	0.0638781	-1.22656	0.219989	0.437384
PA14_06730	250.815	0.164017	0.146493	1.11962	0.262875	0.490378
PA14_06740	825.391	-0.0176755	0.0692347	-0.255298	0.798493	0.906096
PA14_06750	1993.15	0.134608	0.0540553	2.49018	0.0127677	0.0459025
PA14_06770	2533.08	-0.0623192	0.0544944	-1.14359	0.252794	0.478483
PA14_06790	3496.92	0.0450903	0.0421931	1.06867	0.28522	0.519257
PA14_06800	878.323	-0.320929	0.0736442	-4.35784	1.31355e-05	7.68918e-05
PA14_06810	465.286	-0.102475	0.099123	-1.03382	0.301221	0.537395
PA14_06830	0.762661	-3.01846	2.11516	-1.42706	0.153562	0.343099
PA14_06840	3987.93	-0.00104366	0.0414549	-0.0251758	0.979915	0.992408
PA14_06860	1192.73	-0.0141075	0.0670068	-0.210538	0.833247	0.922856
PA14_06870	999.797	-0.0504624	0.063649	-0.792823	0.427881	0.659457
PA14_06875	9844.74	0.213649	0.0412842	5.17507	2.27828e-07	1.58892e-06
PA14_06880	239.173	-0.0669858	0.121387	-0.551836	0.581061	0.780238
PA14_06890	1114.39	0.0196518	0.0601498	0.326715	0.743884	0.878685
PA14_06900	979.713	-0.112777	0.0650033	-1.73494	0.0827521	0.218367
PA14_06920	795.516	0.239086	0.119711	1.9972	0.0458039	0.136237
PA14_06930	628.621	-0.019035	0.0823658	-0.231104	0.817234	0.917653
PA14_06940	3257.78	-0.0290266	0.0429132	-0.676402	0.498785	0.72558
PA14_06960	2389.09	0.0210886	0.0512159	0.411759	0.680516	0.846772
PA14_06970	853.909	-0.0654399	0.0787535	-0.830946	0.406004	0.63926
PA14_06980	583.953	0.0453498	0.0868917	0.521912	0.601732	0.794851
PA14_06990	914.841	-0.101591	0.067531	-1.50436	0.132489	0.308002
PA14_07000	2202.77	0.133382	0.0489192	2.72658	0.00639938	0.0247949
PA14_07010	11.932	-0.927627	0.570423	-1.62621	0.103905	0.258003
PA14_07020	4694.64	0.0152308	0.0419377	0.363177	0.716472	0.865921
PA14_07030	1784.36	0.29397	0.072052	4.07997	4.50409e-05	0.000247355
PA14_07040	1113.88	-0.0527901	0.0577335	-0.914375	0.36052	0.594659
PA14_07050	453.317	0.0286654	0.102982	0.278354	0.780741	0.896547
PA14_07060	1233.47	-0.0521522	0.0584708	-0.891936	0.372427	0.606706
PA14_07070	1049.25	-0.0220563	0.0663743	-0.332302	0.739661	0.877528
PA14_07090	1435.18	-0.290671	0.0696198	-4.17511	2.97838e-05	0.000166298
PA14_07110	236.466	-5.57066	0.260271	-21.4033	1.24473e-101	5.5709e-100
PA14_07130	547.599	-0.277966	0.0901571	-3.08313	0.00204836	0.00882037
PA14_07140	2338.76	-0.0498647	0.0627979	-0.79405	0.427166	0.658891
PA14_07150	1677.12	0.132384	0.0534312	2.47765	0.0132252	0.0473673
PA14_07170	273.158	0.269347	0.128081	2.10294	0.0354712	0.109994
PA14_07190	1274.24	-0.145824	0.0699229	-2.0855	0.0370242	0.113939
PA14_07200	4302.32	0.00665021	0.0466378	0.142593	0.886612	0.949953
PA14_07210	114.216	-0.123822	0.186024	-0.665625	0.505651	0.731142
PA14_07230	16.1458	-5.41543	0.923833	-5.86192	4.57552e-09	3.57734e-08
PA14_07240	3512.44	0.0737503	0.0559474	1.31821	0.187434	0.392982
PA14_07250	1585.23	0.00713942	0.0754725	0.0945963	0.924636	0.967175
PA14_07260	270.401	-0.0338257	0.115257	-0.293481	0.769154	0.890946
PA14_07280	2114.09	0.221506	0.0566501	3.91007	9.227e-05	0.000487419
PA14_07290	2414.88	-0.0368644	0.063753	-0.578238	0.563103	0.769847
PA14_07300	520.545	0.0699932	0.0824439	0.848979	0.395893	0.630147
PA14_07310	1124.92	0.357083	0.080207	4.45202	8.50657e-06	5.05239e-05
PA14_07330	1408.99	0.0873165	0.0634415	1.37633	0.168719	0.368138
PA14_07340	33.8313	0.160379	0.386179	0.415299	0.677923	0.845836
PA14_07355	144.667	-4.8124	0.260641	-18.4637	4.04528e-76	1.34464e-74
PA14_07360	463.991	0.327346	0.0800441	4.08957	4.32178e-05	0.000237803
PA14_07370	673.642	-0.0614875	0.0911824	-0.674335	0.500098	0.726626
PA14_07380	848.299	0.0207464	0.0709132	0.292561	0.769858	0.891406
PA14_07400	857.636	0.067185	0.0657906	1.0212	0.307162	0.545256
PA14_07410	1166.55	0.000372672	0.0655692	0.00568365	0.995465	0.997776
PA14_07420	72.6356	-0.154875	0.199865	-0.774899	0.4384	0.670587
PA14_07430	232.524	0.0680117	0.117637	0.578149	0.563164	0.769847
PA14_07440	4196.73	0.249803	0.0525461	4.75398	1.99456e-06	1.26671e-05
PA14_07450	1037.68	-0.102608	0.0724868	-1.41555	0.156909	0.348834
PA14_07460	515.604	-0.173133	0.0869563	-1.99104	0.0464766	0.137447
PA14_07470	926.222	0.173784	0.0740072	2.3482	0.0188644	0.0647104
PA14_07480	945.755	0.00165281	0.0659706	0.0250538	0.980012	0.992408
PA14_07500	286.021	0.720323	0.126436	5.69715	1.21826e-08	9.22049e-08
PA14_07520	6.25929	-5.31939	1.16244	-4.57606	4.73813e-06	2.88656e-05
PA14_07530	299.12	0.482555	0.103367	4.66837	3.03603e-06	1.88599e-05
PA14_07550	3.50085	-3.70491	1.24536	-2.97496	0.00293031	0.0121932
PA14_07560	162.49	-0.222308	0.160365	-1.38626	0.165666	0.362451
PA14_07570	130.741	0.326943	0.161836	2.02022	0.0433608	0.130404
PA14_07580	861.706	0.0559156	0.0664684	0.841235	0.400216	0.63401
PA14_07590	771.304	-1.78946	0.0862696	-20.7427	1.42824e-95	6.10384e-94
PA14_07600	275.874	-1.65349	0.120483	-13.7239	7.30503e-43	1.55512e-41
PA14_07620	2128.16	-0.437401	0.0589288	-7.42254	1.14892e-13	1.17878e-12
PA14_07630	337.194	-0.146711	0.112633	-1.30255	0.192727	0.401856
PA14_07650	472.546	0.272053	0.0949168	2.86623	0.00415394	0.0169012
PA14_07660	1446.29	0.124923	0.0805304	1.55125	0.120842	0.288356
PA14_07680	483.948	0.0269968	0.101586	0.265753	0.790429	0.899727
PA14_07690	1146.34	0.0815328	0.0568223	1.43487	0.151323	0.339551
PA14_07700	238.418	-0.0318061	0.116755	-0.272418	0.7853	0.897938
PA14_07710	6253.26	-0.0960786	0.0356252	-2.69693	0.00699824	0.026831
PA14_07730	464.012	-0.143946	0.0997723	-1.44274	0.149093	0.336823
PA14_07760	1783.33	-0.336122	0.064589	-5.20401	1.9503e-07	1.37027e-06
PA14_07770	590.168	-2.12926	0.0816501	-26.0778	6.50954e-150	4.86845e-148
PA14_07780	315.063	0.118062	0.0977038	1.20836	0.226907	0.447453
PA14_07790	70.3149	0.656358	0.210896	3.11224	0.00185673	0.00808512
PA14_07800	1379.16	0.128254	0.0837686	1.53105	0.125757	0.295881
PA14_07810	814.184	-0.0581583	0.071765	-0.810399	0.417711	0.648236
PA14_07820	385.328	-0.0907877	0.100189	-0.90616	0.364851	0.598676
PA14_07840	844.358	0.0426028	0.0738213	0.577107	0.563867	0.769992
PA14_07850	334.788	-0.0866531	0.102889	-0.842203	0.399674	0.633555
PA14_07860	3234.12	0.0235232	0.0573735	0.410001	0.681806	0.847634
PA14_07870	29.2664	0.370301	0.340079	1.08887	0.276212	0.507594
PA14_07890	1513.26	-0.421161	0.0869932	-4.84131	1.28989e-06	8.31262e-06
PA14_07900	561.829	-0.010764	0.0806201	-0.133516	0.893786	0.951719
PA14_07910	126.459	-5.94797	0.386271	-15.3984	1.6768e-53	4.31263e-52
PA14_07930	1480.38	0.20944	0.0589547	3.55256	0.000381501	0.00182223
PA14_07940	516.592	-0.0127865	0.105004	-0.121771	0.90308	0.956955
PA14_07950	334.717	-1.39	0.104397	-13.3145	1.90608e-40	3.95406e-39
PA14_07960	377.394	-6.5005	0.267146	-24.3332	8.74059e-131	5.22963e-129
PA14_07970	1156.78	-0.0124376	0.0591564	-0.210249	0.833474	0.922856
PA14_07980	1699.33	-0.0574268	0.0664239	-0.864551	0.387285	0.622548
PA14_07990	26.2719	-0.706815	0.328438	-2.15205	0.0313932	0.0995214
PA14_08000	6665.06	0.378498	0.0410591	9.21836	3.01671e-20	3.83602e-19
PA14_08010	471.157	0.00781405	0.086692	0.0901358	0.928179	0.969454
PA14_08020	459.267	-0.0950735	0.0851841	-1.11609	0.264382	0.492293
PA14_08030	1657.22	0.386231	0.0531466	7.26728	3.66795e-13	3.69002e-12
PA14_08040	1881.71	0.104262	0.0584904	1.78255	0.07466	0.201122
PA14_08050	350.843	0.272932	0.117966	2.31365	0.020687	0.0699749
PA14_08060	1472.66	-0.0122024	0.0548282	-0.222557	0.82388	0.919446
PA14_08070	4351.67	0.189299	0.0380825	4.97076	6.66911e-07	4.44921e-06
PA14_08090	1884.43	-0.026572	0.161545	-0.164486	0.869349	0.941894
PA14_08100	641.924	-0.0478818	0.101032	-0.473928	0.635551	0.816378
PA14_08110	805.828	-0.0639078	0.0649307	-0.984247	0.324994	0.561308
PA14_08120	620.403	0.382713	0.0887136	4.31403	1.60305e-05	9.3167e-05
PA14_08130	619.836	0.433239	0.102125	4.24225	2.21285e-05	0.000125905
PA14_08140	103.447	-7.37066	0.664441	-11.093	1.35624e-28	2.28072e-27
PA14_08150	763.992	-0.046921	0.0754484	-0.621895	0.534011	0.750202
PA14_08160	396.095	-0.0316342	0.0913523	-0.346288	0.729126	0.873047
PA14_08180	886.306	-0.0103271	0.0636775	-0.162179	0.871165	0.943042
PA14_08190	1990.29	0.149413	0.0482705	3.09533	0.00196597	0.00851071
PA14_08200	2496.19	0.201555	0.053572	3.76232	0.000168345	0.000861272
PA14_08210	2624.16	0.0584482	0.0629811	0.928028	0.353393	0.587507
PA14_08220	329.165	-0.0865352	0.11686	-0.740504	0.458994	0.689827
PA14_08230	32.9577	0.388932	0.301387	1.29047	0.196887	0.407243
PA14_08250	598.409	0.10049	0.0775289	1.29616	0.194919	0.405325
PA14_08260	571.309	0.147174	0.073566	2.00058	0.0454382	0.135362
PA14_08270	1151.58	0.162264	0.0780741	2.07834	0.0376782	0.115452
PA14_08280	305.668	0.0841638	0.101829	0.82652	0.408509	0.641073
PA14_08300	1114.27	-1.05786	0.0606119	-17.453	3.26367e-68	1.00274e-66
PA14_08310	2674.34	0.0351883	0.0634062	0.554966	0.578918	0.779386
PA14_08320	1939.52	-0.0810492	0.0502978	-1.61139	0.107096	0.263749
PA14_08330	2989.88	0.0385872	0.0548091	0.704029	0.481414	0.711667
PA14_08340	363.527	-0.171738	0.106307	-1.61549	0.106204	0.26232
PA14_08350	979.316	0.115389	0.0627634	1.83848	0.0659916	0.181821
PA14_08360	3144.28	-0.00636156	0.0451642	-0.140854	0.887985	0.950708
PA14_08370	2752.69	0.27513	0.275008	1.00044	0.317097	0.553844
PA14_08380	1434.96	0.0720519	0.0796558	0.90454	0.365709	0.599565
PA14_08390	1171.6	-0.0837082	0.057657	-1.45183	0.146549	0.333594
PA14_08400	171.797	-2.25074	0.1518	-14.827	9.80227e-50	2.38103e-48
PA14_08420	2249.5	0.156002	0.0506468	3.08019	0.00206866	0.00889429
PA14_08430	510.972	-0.118219	0.0787724	-1.50076	0.133417	0.309528
PA14_08440	2794.61	0.0150242	0.0469617	0.319925	0.749025	0.88125
PA14_08450	2654.19	-0.0970291	0.0447348	-2.16898	0.030084	0.0961741
PA14_08460	891.503	-0.0731351	0.0722193	-1.01268	0.311213	0.550042
PA14_08470	509.777	-3.61103	0.113656	-31.7716	1.59957e-221	2.06635e-219
PA14_08480	3055.91	0.461377	0.0533284	8.65161	5.0778e-18	6.06349e-17
PA14_08490	2227.07	0.0668096	0.0553515	1.20701	0.227429	0.447924
PA14_08500	184.284	0.140691	0.139365	1.00952	0.312726	0.551397
PA14_08510	271.412	-3.71258	0.151107	-24.5693	2.69015e-133	1.62668e-131
PA14_08520	2642.7	0.116714	0.0543468	2.14758	0.031747	0.100304
PA14_08540	2453	0.253756	0.0549532	4.61767	3.88075e-06	2.38467e-05
PA14_08560	1396.24	-0.0598533	0.0631504	-0.94779	0.343236	0.577379
PA14_08620	92.5061	-2.57181	0.21079	-12.2009	3.07568e-34	5.71313e-33
PA14_08630	1219.24	-0.240064	0.0611144	-3.92811	8.56166e-05	0.000454384
PA14_08640	2251.6	-0.396592	0.0579495	-6.84376	7.71408e-12	7.23545e-11
PA14_08650	202.421	1.36402	0.185006	7.37283	1.67047e-13	1.69553e-12
PA14_08680	117.694	-3.30658	0.25274	-13.0829	4.12307e-39	8.2811e-38
PA14_08690	960.435	-7.44303	0.228	-32.6448	9.4956e-234	1.58744e-231
PA14_08695	6058.11	-5.90612	0.0819016	-72.1123	0	0
PA14_08720	308.531	-7.01446	0.342722	-20.4669	4.2479e-93	1.74964e-91
PA14_08730	1077.99	0.385222	0.0668938	5.7587	8.47621e-09	6.51064e-08
PA14_08740	414.742	-3.99556	0.132967	-30.0491	2.24096e-198	2.54752e-196
PA14_08750	283.121	-8.55809	0.59683	-14.3392	1.24404e-46	2.81718e-45
PA14_08760	1318.69	0.00348085	0.065681	0.0529963	0.957735	0.982452
PA14_08780	1667.62	-1.32905	0.0559318	-23.762	8.25203e-125	4.64402e-123
PA14_08790	610.494	0.578627	0.0714305	8.10056	5.47049e-16	6.19408e-15
PA14_08820	467.867	-0.216813	0.0922056	-2.3514	0.0187027	0.0642721
PA14_08830	327.739	0.477996	0.0951451	5.02386	5.0643e-07	3.4187e-06
PA14_08850	792.626	0.544489	0.0925336	5.88423	3.99915e-09	3.14837e-08
PA14_08870	0.204819	-1.2937	3.52984	-0.366505	0.713988	0.865368
PA14_08880	354.381	0.399109	0.107099	3.72655	0.000194121	0.000981657
PA14_08930	31.6782	-0.21289	0.334924	-0.635637	0.525013	0.744319
PA14_08970	3.38784	-1.52887	1.07115	-1.42732	0.153488	0.34307
PA14_08990	92.9435	0.206413	0.200415	1.02993	0.303045	0.539971
PA14_09000	589.39	0.155163	0.0825002	1.88076	0.0600041	0.169262
PA14_09020	64.4445	-8.70856	1.03763	-8.39275	4.74884e-17	5.51992e-16
PA14_09030	65.4914	-8.72657	1.03707	-8.41467	3.94012e-17	4.5987e-16
PA14_09040	549.653	-4.66199	0.132161	-35.2751	1.41363e-272	3.21403e-270
PA14_09050	9.34258	-6.64402	1.13403	-5.85879	4.6626e-09	3.64042e-08
PA14_09070	0.490902	-2.39032	2.43498	-0.981661	0.326267	0.562481
PA14_09080	145.081	0.62021	0.504875	1.22844	0.219281	0.436557
PA14_09090	26.3707	-3.88679	0.510109	-7.61953	2.54608e-14	2.68995e-13
PA14_09100	86.7228	-0.0232463	0.209715	-0.110847	0.911738	0.961469
PA14_09115	59.2754	0.475092	0.219624	2.16321	0.0305253	0.0974203
PA14_09130	483.991	0.548095	0.0907143	6.04199	1.52222e-09	1.23959e-08
PA14_09150	2310.43	-0.0250174	0.0476225	-0.525329	0.599355	0.79337
PA14_09160	380.229	-0.19675	0.103996	-1.89191	0.0585027	0.166099
PA14_09180	1.31719	-0.12707	1.70351	-0.0745932	0.940538	0.97466
PA14_09195	1653.77	-0.447792	0.0592261	-7.56072	4.00851e-14	4.17297e-13
PA14_09200	123.76	-1.59104	0.170834	-9.31333	1.23881e-20	1.58948e-19
PA14_09210	490.067	-0.0550176	0.0941842	-0.584149	0.55912	0.768504
PA14_09220	2255.87	-0.00144552	0.0557553	-0.0259261	0.979316	0.992408
PA14_09230	1602.41	0.082657	0.0678496	1.21824	0.223134	0.442232
PA14_09260	1087.95	-0.00781997	0.0701958	-0.111402	0.911297	0.961183
PA14_09270	572.93	0.0390251	0.0722935	0.539814	0.589325	0.785951
PA14_09280	1033.02	0.0102567	0.0583485	0.175783	0.860464	0.935695
PA14_09290	229.962	0.127746	0.12776	0.99989	0.317364	0.553852
PA14_09300	3387.33	0.0394362	0.0430417	0.916232	0.359545	0.593725
PA14_09320	499.759	0.122827	0.095116	1.29133	0.196588	0.40692
PA14_09340	338.54	0.637353	0.123835	5.14678	2.64994e-07	1.83686e-06
PA14_09350	964.124	0.102397	0.0824257	1.2423	0.214127	0.430938
PA14_09370	1721.77	0.0171057	0.0606951	0.281829	0.778074	0.895429
PA14_09380	40.3675	-0.247942	0.290546	-0.853366	0.393456	0.628557
PA14_09400	2813.58	-0.00305582	0.0691252	-0.0442071	0.964739	0.985546
PA14_09410	3632.3	0.261137	0.0486802	5.36434	8.12478e-08	5.83096e-07
PA14_09440	3636.22	0.50245	0.0507328	9.90384	4.00604e-23	5.66425e-22
PA14_09450	4908.06	-0.127726	0.0442424	-2.88696	0.0038898	0.0159176
PA14_09460	1263.86	-0.0461451	0.061233	-0.753597	0.451091	0.683734
PA14_09470	7033.09	0.036867	0.163281	0.225789	0.821365	0.919367
PA14_09480	1849.35	0.106033	0.0493323	2.14937	0.0316051	0.100024
PA14_09490	97.8999	0.14795	0.176878	0.836451	0.402901	0.636779
PA14_09500	4968.66	0.0908783	0.050781	1.78961	0.0735164	0.1987
PA14_09520	560.131	0.0274506	0.0799106	0.343516	0.73121	0.873702
PA14_09530	1638.18	0.11944	0.0554813	2.15279	0.0313351	0.0994466
PA14_09540	946.36	0.0499487	0.0639543	0.781005	0.434799	0.666557
PA14_09550	304.114	0.626619	0.109548	5.72006	1.06489e-08	8.08123e-08
PA14_09570	140.843	-1.06596	0.157679	-6.76029	1.37712e-11	1.27277e-10
PA14_09580	2588.68	0.137336	0.0558039	2.46104	0.0138534	0.0493996
PA14_09600	39.4983	0.19223	0.315953	0.608413	0.542914	0.75691
PA14_09610	26.9172	-0.0991361	0.340426	-0.291212	0.770889	0.892047
PA14_09630	593.961	-0.0575858	0.0821525	-0.700962	0.483327	0.713752
PA14_09680	1695.33	0.345517	0.0740038	4.66891	3.028e-06	1.88306e-05
PA14_09690	3399.75	-0.02053	0.059624	-0.344324	0.730603	0.873662
PA14_09700	3103.44	0.0762489	0.0557003	1.36891	0.171026	0.371319
PA14_09710	909.832	0.0608117	0.095997	0.633475	0.526424	0.74449
PA14_09730	8531.7	-0.0663644	0.0356669	-1.86067	0.0627909	0.175203
PA14_09740	2170.49	0.0846291	0.0598254	1.4146	0.157185	0.349168
PA14_09760	538.289	0.0650804	0.0980434	0.663791	0.506824	0.731406
PA14_09770	435.93	-0.911165	0.0882732	-10.3221	5.59871e-25	8.39659e-24
PA14_09780	648.969	-0.251922	0.0968609	-2.60086	0.00929895	0.0347275
PA14_09790	1916.99	0.00772503	0.0559162	0.138154	0.890119	0.950755
PA14_09810	1885.02	-0.07192	0.0519297	-1.38495	0.166068	0.362911
PA14_09820	2242.55	0.0103579	0.0542364	0.190977	0.848544	0.929848
PA14_09850	84.4078	-0.0820688	0.219643	-0.373646	0.708668	0.862172
PA14_09870	1497.32	0.0550238	0.0662578	0.830451	0.406284	0.639523
PA14_09880	3010.19	0.00291999	0.0500349	0.0583592	0.953463	0.980846
PA14_09890	1272.48	0.0586495	0.0604183	0.970724	0.331686	0.567008
PA14_09900	929.587	0.0697313	0.06799	1.02561	0.305075	0.542738
PA14_09910	2532.45	0.122639	0.0477992	2.56572	0.0102963	0.0380027
PA14_09920	27.1791	0.445056	0.310401	1.43381	0.151626	0.33971
PA14_09930	368.165	-0.209442	0.0903162	-2.31899	0.0203957	0.069129
PA14_09940	199.281	0.0047035	0.129542	0.0363087	0.971036	0.987247
PA14_09950	37.4116	-0.550162	0.291911	-1.88469	0.0594713	0.168177
PA14_09960	181.649	0.594849	0.165142	3.60204	0.000315731	0.00153386
PA14_09970	1639.59	0.0154783	0.0490283	0.315702	0.752229	0.882856
PA14_09980	15.1581	-1.15094	0.449291	-2.56167	0.0104169	0.0383981
PA14_09990	3224.82	-0.0344132	0.0416923	-0.825409	0.40914	0.641437
PA14_10010	1205.34	0.114323	0.0666825	1.71443	0.0864493	0.22565
PA14_10020	244.779	-0.055783	0.131474	-0.42429	0.671355	0.841265
PA14_10040	1875.77	-0.189033	0.0818548	-2.30937	0.0209233	0.0706644
PA14_10050	656.981	0.25452	0.0910876	2.79423	0.00520227	0.0205631
PA14_10070	2792.61	0.133398	0.134596	0.9911	0.321637	0.557883
PA14_10080	2510.4	0.0537147	0.0586929	0.915182	0.360096	0.594132
PA14_10090	744.181	0.00283474	0.072707	0.0389886	0.9689	0.987247
PA14_10110	1050.77	0.00356996	0.0701027	0.0509246	0.959386	0.982923
PA14_10120	931.998	0.0753493	0.072429	1.04032	0.298192	0.533497
PA14_10130	614.544	0.536381	0.096458	5.56077	2.68585e-08	1.98265e-07
PA14_10140	542.441	0.0133802	0.0757539	0.176627	0.859801	0.935153
PA14_10160	142.304	-0.107117	0.171192	-0.625713	0.531503	0.749008
PA14_10170	13.5232	-0.443491	0.457496	-0.969388	0.332352	0.567634
PA14_10180	459.137	0.00135799	0.0871957	0.0155741	0.987574	0.993517
PA14_10190	4209.05	-0.0492968	0.0466239	-1.05733	0.290362	0.525443
PA14_10200	1482.53	0.428228	0.0671601	6.37622	1.81509e-10	1.58479e-09
PA14_10210	1412.06	0.32454	0.0730386	4.44341	8.85442e-06	5.24802e-05
PA14_10220	258.643	0.221748	0.115066	1.92713	0.053963	0.155383
PA14_10230	2272.11	0.286815	0.0583153	4.91834	8.72803e-07	5.74857e-06
PA14_10240	246.575	-0.071306	0.120266	-0.592901	0.553248	0.764553
PA14_10250	14977.4	-0.100531	0.0427122	-2.35368	0.0185888	0.0639194
PA14_10260	53.0622	0.315443	0.239929	1.31473	0.1886	0.394845
PA14_10270	2810.43	0.0569348	0.0484969	1.17399	0.2404	0.463511
PA14_10280	1311.44	-0.0546637	0.0616492	-0.88669	0.375246	0.609051
PA14_10290	2537.78	0.126169	0.072851	1.73187	0.0832963	0.219599
PA14_10300	500.464	-0.408954	0.0986787	-4.1443	3.40857e-05	0.000188833
PA14_10320	251.627	-0.165413	0.12838	-1.28847	0.197584	0.408388
PA14_10330	1129.86	0.0622851	0.0673317	0.925049	0.354941	0.58853
PA14_10340	1058.75	1.27351	0.0737309	17.2724	7.59343e-67	2.27163e-65
PA14_10350	1553.49	0.429283	0.0536208	8.0059	1.18601e-15	1.32964e-14
PA14_10360	1422.58	-0.032371	0.060178	-0.537921	0.590631	0.78668
PA14_10370	2463.23	0.724415	0.0625569	11.5801	5.19869e-31	9.20541e-30
PA14_10380	579.451	0.100708	0.0845227	1.19149	0.233461	0.455386
PA14_10400	77.2235	-5.05478	0.376448	-13.4276	4.16885e-41	8.71168e-40
PA14_10410	3129.47	-0.0370681	0.0567444	-0.653246	0.513597	0.736636
PA14_10420	317.335	-0.434017	0.0989497	-4.38624	1.15328e-05	6.78597e-05
PA14_10440	626.363	-0.0760626	0.0882546	-0.861854	0.388768	0.623521
PA14_10470	4150.94	0.0498565	0.0495544	1.00609	0.31437	0.553042
PA14_10480	633.389	-0.334128	0.0876949	-3.81013	0.000138896	0.00071576
PA14_10490	1487.85	0.103766	0.0656601	1.58036	0.114025	0.27662
PA14_10500	3095.66	0.0224711	0.149082	0.15073	0.880189	0.947023
PA14_10530	948.341	0.178825	0.0719858	2.48416	0.0129856	0.0466269
PA14_10540	63.4148	0.512468	0.624315	0.820847	0.411733	0.643645
PA14_10550	2000.1	0.018515	0.0518455	0.357118	0.721003	0.867887
PA14_10560	1160.27	0.375067	0.0855282	4.38531	1.15822e-05	6.80798e-05
PA14_10570	729.191	0.335622	0.0833297	4.02764	5.63397e-05	0.000305568
PA14_10590	1531.58	0.0826775	0.0621118	1.33111	0.183154	0.38715
PA14_10600	258.868	0.0612169	0.121788	0.50265	0.61521	0.805098
PA14_10610	1452.19	0.681771	0.0893782	7.62793	2.38545e-14	2.52965e-13
PA14_10620	769.398	0.49596	0.081654	6.07392	1.24822e-09	1.02675e-08
PA14_10630	1781.24	-0.0516392	0.0549339	-0.940025	0.347205	0.580616
PA14_10640	326.567	-0.112604	0.0979945	-1.14909	0.250521	0.475923
PA14_10650	5404.72	0.039801	0.0446619	0.891163	0.372842	0.606883
PA14_10660	449.818	-0.208356	0.119239	-1.74738	0.0805713	0.213776
PA14_10680	2330.6	-0.0590775	0.0520597	-1.1348	0.256458	0.483324
PA14_10700	348.503	-0.149215	0.132739	-1.12413	0.260959	0.488131
PA14_10710	913.779	0.0102513	0.0670778	0.152827	0.878535	0.947023
PA14_10730	795.622	0.0310054	0.0764188	0.40573	0.684941	0.849522
PA14_10740	1090.5	0.311732	0.0684475	4.55432	5.25542e-06	3.19143e-05
PA14_10750	1852.7	0.0525292	0.0639383	0.821561	0.411327	0.64354
PA14_10770	3016.85	-0.0623571	0.0487716	-1.27855	0.201054	0.413307
PA14_10780	3997.32	-0.152705	0.0383044	-3.98662	6.70219e-05	0.000360068
PA14_10790	148.857	-0.290562	0.171478	-1.69446	0.0901784	0.232392
PA14_10800	241.473	-0.0269476	0.111011	-0.242748	0.808201	0.912014
PA14_10820	2654.38	-0.0429341	0.0478954	-0.896414	0.370032	0.604211
PA14_10830	559.56	0.0728289	0.0979471	0.743554	0.457147	0.689054
PA14_10840	7075.11	-0.113914	0.0515661	-2.20908	0.027169	0.0884978
PA14_10850	5010.92	-0.374262	0.0436278	-8.57853	9.60929e-18	1.14266e-16
PA14_10870	2508.37	1.07685	0.050818	21.1902	1.17489e-99	5.1768e-98
PA14_10890	1539.11	-0.152018	0.157108	-0.967599	0.333245	0.568306
PA14_10900	1737.67	0.0895267	0.054858	1.63197	0.102685	0.255433
PA14_10910	1629.03	-0.0444588	0.0515159	-0.863012	0.388131	0.62285
PA14_10920	943.034	0.342263	0.0703524	4.86498	1.14469e-06	7.43592e-06
PA14_10940	1175.59	0.103084	0.0619521	1.66393	0.096126	0.243485
PA14_10950	1951.11	-0.0755393	0.0491881	-1.53572	0.124606	0.294392
PA14_10970	120.997	-0.0113574	0.177758	-0.0638925	0.949056	0.978007
PA14_10990	4283.87	-0.177664	0.0501456	-3.54296	0.000395657	0.00188509
PA14_11000	167.833	0.0572771	0.147163	0.389208	0.697123	0.857613
PA14_11010	2065.08	-0.191706	0.0539081	-3.55615	0.000376324	0.00179901
PA14_11020	1262.73	0.260205	0.0590577	4.40594	1.05325e-05	6.2167e-05
PA14_11030	1060.7	0.0367184	0.069307	0.529793	0.596256	0.790372
PA14_11050	1129.82	0.0769276	0.060099	1.28001	0.20054	0.412398
PA14_11060	335.523	0.154585	0.119881	1.28949	0.197227	0.407798
PA14_11070	6.71833	-0.831783	0.691391	-1.20306	0.228954	0.450085
PA14_11080	2333.52	0.626227	0.0720161	8.69565	3.44862e-18	4.13543e-17
PA14_11090	1749.06	0.0885141	0.0709909	1.24684	0.212457	0.429269
PA14_11100	522.674	-0.0550204	0.0823032	-0.668509	0.503809	0.729531
PA14_11110	184.248	-0.080398	0.133371	-0.602816	0.546631	0.759299
PA14_11120	1425.79	-0.0376736	0.0577701	-0.65213	0.514318	0.736988
PA14_11130	2668.28	0.140571	0.0520566	2.70034	0.00692677	0.0266025
PA14_11140	73.2079	0.449934	0.211942	2.12291	0.0337611	0.105496
PA14_11150	2872.28	0.256329	0.0694817	3.68916	0.000224991	0.00112377
PA14_11160	2585.81	-0.0150128	0.0456318	-0.328998	0.742157	0.878358
PA14_11170	129.707	0.222086	0.147779	1.50283	0.132883	0.308667
PA14_11180	2793.62	0.275362	0.0445757	6.1774	6.51641e-10	5.47149e-09
PA14_11190	645.187	0.161609	0.083465	1.93625	0.0528367	0.152914
PA14_11210	1176.49	-0.0109887	0.0783919	-0.140177	0.88852	0.950755
PA14_11230	419.976	-2.2961	0.303208	-7.57269	3.65561e-14	3.81957e-13
PA14_11240	33.8378	0.106115	0.309507	0.342851	0.73171	0.874068
PA14_11250	103.275	-6.35564	0.480642	-13.2232	6.44251e-40	1.31724e-38
PA14_11270	1576.69	0.225175	0.0682923	3.29723	0.000976448	0.00445079
PA14_11280	620.384	-0.0628798	0.0754543	-0.833349	0.404648	0.638008
PA14_11290	3183.45	-0.026348	0.0451496	-0.583571	0.559509	0.768504
PA14_11310	134.173	-0.0753067	0.166726	-0.45168	0.6515	0.828069
PA14_11320	2344.84	0.0764821	0.0536019	1.42685	0.153622	0.343099
PA14_11330	2375.14	-0.118617	0.0445402	-2.66314	0.00774146	0.0293347
PA14_11340	2034.67	0.110156	0.0581118	1.89559	0.0580142	0.165042
PA14_11350	987.383	-0.0942656	0.0662173	-1.42358	0.154568	0.344806
PA14_11370	1416.94	0.0761066	0.0535718	1.42065	0.15542	0.346569
PA14_11380	48.5831	-5.56718	0.549853	-10.1248	4.28663e-24	6.24749e-23
PA14_11400	1366.37	-0.20827	0.0572766	-3.63621	0.000276682	0.00135926
PA14_11410	1026.73	0.0203352	0.0576883	0.352501	0.724463	0.869459
PA14_11420	1057.61	-0.104659	0.0613539	-1.70582	0.0880417	0.22882
PA14_11430	33.6129	-2.57082	0.36652	-7.01415	2.31353e-12	2.23172e-11
PA14_11450	206.661	0.44932	0.133824	3.35754	0.000786382	0.00362808
PA14_11460	226.454	-3.46316	0.151013	-22.9328	2.18595e-116	1.10937e-114
PA14_11470	2434.87	0.0265019	0.050653	0.523204	0.600832	0.794401
PA14_11480	596.872	-0.152948	0.0900947	-1.69763	0.0895768	0.231014
PA14_11490	1519.49	-0.00218005	0.0566613	-0.0384752	0.969309	0.987247
PA14_11510	48.7785	-7.57704	1.0087	-7.51168	5.83749e-14	6.04377e-13
PA14_11520	1335.82	0.0230595	0.0690868	0.333776	0.738549	0.877521
PA14_11530	80.8536	0.199628	0.19158	1.04201	0.297408	0.532724
PA14_11550	98.6419	0.722522	0.209375	3.45085	0.000558819	0.00261857
PA14_11560	1765.36	-0.111459	0.0530321	-2.10173	0.0355771	0.11018
PA14_11570	115.281	-0.556375	0.186611	-2.98147	0.00286872	0.0119693
PA14_11580	1862.91	0.063794	0.0728853	0.875266	0.381429	0.615746
PA14_11590	1555.94	0.0345679	0.0553624	0.624392	0.53237	0.749008
PA14_11600	936.162	-0.185115	0.0957218	-1.93389	0.053127	0.153442
PA14_11610	659.261	-0.835452	0.0831379	-10.049	9.28121e-24	1.33894e-22
PA14_11620	2442.28	0.511167	0.0889151	5.74893	8.9808e-09	6.87038e-08
PA14_11630	1209.35	-0.0440031	0.0678667	-0.648375	0.516742	0.73877
PA14_11650	432.761	-0.282249	0.132996	-2.12224	0.0338177	0.105615
PA14_11660	1555.06	-0.043636	0.055084	-0.792172	0.428261	0.659863
PA14_11670	232.354	0.0778008	0.114283	0.680776	0.496013	0.723464
PA14_11680	2166.06	-0.251026	0.0534017	-4.70071	2.59254e-06	1.62112e-05
PA14_11690	1367.16	-0.0347052	0.0684943	-0.506688	0.612374	0.803493
PA14_11720	576.695	0.0516017	0.0818086	0.630762	0.528196	0.746647
PA14_11730	557.826	0.265876	0.0911096	2.9182	0.00352064	0.0145115
PA14_11740	467.448	0.0876233	0.0949958	0.922392	0.356324	0.590136
PA14_11750	62.1631	0.0912861	0.225125	0.40549	0.685117	0.849522
PA14_11760	2855.95	-0.255565	0.0463248	-5.51681	3.45216e-08	2.52537e-07
PA14_11770	4478.68	0.0549672	0.0403431	1.36249	0.173042	0.373981
PA14_11790	3220.69	-0.0542052	0.0815882	-0.664375	0.50645	0.731406
PA14_11830	1809.76	0.521283	0.0741595	7.02922	2.07699e-12	2.01117e-11
PA14_11845	505.776	-2.15213	0.0969658	-22.1948	3.85967e-109	1.85919e-107
PA14_11860	459.825	-0.742568	0.085043	-8.73168	2.50924e-18	3.02814e-17
PA14_11880	5016.58	0.380178	0.0428717	8.86781	7.45977e-19	9.13821e-18
PA14_11890	1292.78	0.0118915	0.0640138	0.185765	0.852629	0.931273
PA14_11900	203.304	-0.0181811	0.119407	-0.152262	0.878981	0.947023
PA14_11910	1990.14	0.0571471	0.0502344	1.13761	0.255284	0.48207
PA14_11920	955.263	-0.0988967	0.0792337	-1.24817	0.211971	0.428464
PA14_11930	2034.5	0.232405	0.0477013	4.87208	1.1043e-06	7.18998e-06
PA14_11940	101.994	-0.080705	0.213792	-0.377492	0.705808	0.861537
PA14_11960	454.09	-0.116919	0.0818558	-1.42835	0.153191	0.342539
PA14_11970	732.041	0.00853545	0.0762507	0.111939	0.910872	0.960912
PA14_11980	334.483	0.138828	0.110767	1.25334	0.210082	0.425858
PA14_11990	2984.05	0.0511346	0.0412643	1.2392	0.215272	0.432065
PA14_12010	718.223	-2.58009	0.0850881	-30.3226	5.76944e-202	6.97734e-200
PA14_12020	662.959	-0.249585	0.0808023	-3.08883	0.00200945	0.00868571
PA14_12030	301.502	-0.472906	0.112989	-4.1854	2.84663e-05	0.000159402
PA14_12050	338.953	-0.32218	0.111903	-2.87911	0.00398801	0.0162494
PA14_12060	2778.85	-0.726967	0.0517338	-14.0521	7.47998e-45	1.65433e-43
PA14_12070	1017.11	0.340409	0.0877872	3.87766	0.000105467	0.000552349
PA14_12080	342.936	-0.218534	0.117874	-1.85395	0.0637459	0.177266
PA14_12090	4.23537	-4.73335	1.2784	-3.70257	0.000213427	0.00106977
PA14_12110	47.2261	-4.90583	0.490385	-10.004	1.46314e-23	2.09483e-22
PA14_12120	1384.77	-0.000621193	0.0563713	-0.0110197	0.991208	0.995852
PA14_12130	1424.75	-0.346262	0.0617715	-5.60552	2.0763e-08	1.54069e-07
PA14_12140	337.643	-0.260657	0.1163	-2.24124	0.0250105	0.0824115
PA14_12160	1669.43	0.0839739	0.0541884	1.54966	0.121222	0.288975
PA14_12170	1165.06	0.0345942	0.0544975	0.634786	0.525568	0.744319
PA14_12180	1652.57	-0.0365599	0.068434	-0.534236	0.593178	0.788393
PA14_12200	1296.86	-1.03857	0.0651185	-15.9489	2.90033e-57	7.85023e-56
PA14_12210	665.369	-1.064	0.0724785	-14.6802	8.63251e-49	2.04447e-47
PA14_12230	8.39875	-5.73938	1.14134	-5.02862	4.94018e-07	3.33888e-06
PA14_12260	1401.42	0.0718706	0.0606114	1.18576	0.235717	0.458056
PA14_12270	759.71	0.153262	0.0678218	2.25977	0.0238355	0.0789517
PA14_12280	905.791	-1.22514	0.0836163	-14.6519	1.30951e-48	3.08848e-47
PA14_12300	8428.1	-0.0363475	0.0409766	-0.887032	0.375062	0.608926
PA14_12310	4067.97	0.000638596	0.0479718	0.0133119	0.989379	0.994629
PA14_12330	2486.34	0.95792	0.0792227	12.0915	1.17152e-33	2.15499e-32
PA14_12350	444.699	0.217196	0.0949595	2.28724	0.0221815	0.0744273
PA14_12360	282.153	-0.181284	0.111174	-1.63064	0.102967	0.255908
PA14_12370	24.891	-0.0973402	0.329276	-0.295619	0.767521	0.890506
PA14_12390	49.802	-4.58361	0.419647	-10.9225	8.99463e-28	1.48621e-26
PA14_12400	74.4315	-0.354023	0.283146	-1.25032	0.211182	0.427479
PA14_12410	328.656	-4.60632	0.178518	-25.8031	8.19483e-147	5.89613e-145
PA14_12430	21617.7	0.1419	0.0333355	4.25672	2.07447e-05	0.000118864
PA14_12440	3543.39	0.665686	0.0453454	14.6803	8.61532e-49	2.04447e-47
PA14_12450	766.39	0.127801	0.087222	1.46524	0.142855	0.326493
PA14_12470	5800.16	0.0257526	0.0458195	0.562044	0.574086	0.775574
PA14_12490	1504.28	0.019275	0.0700651	0.275101	0.783239	0.897205
PA14_12530	20300.3	-0.0532177	0.0556276	-0.956678	0.33873	0.572677
PA14_12540	64.6847	-0.116673	0.208475	-0.559647	0.57572	0.776737
PA14_12550	3252.52	-0.110618	0.0501234	-2.20692	0.0273198	0.0888361
PA14_12560	3022.67	-0.00293078	0.0453702	-0.0645969	0.948495	0.977949
PA14_12570	4815.21	0.259403	0.0390007	6.65125	2.90622e-11	2.64304e-10
PA14_12590	1612.55	0.326854	0.0610795	5.3513	8.73259e-08	6.25781e-07
PA14_12620	4816.44	0.027872	0.042605	0.654194	0.512987	0.736374
PA14_12640	394.893	-0.356658	0.0956387	-3.72922	0.000192073	0.000973031
PA14_12650	74.8807	0.289993	0.253997	1.14172	0.253571	0.479289
PA14_12670	229.722	-0.122141	0.120035	-1.01754	0.308894	0.547062
PA14_12680	2029.1	-0.0545305	0.0491809	-1.10877	0.267528	0.496289
PA14_12690	395.339	0.0468361	0.115455	0.405664	0.684989	0.849522
PA14_12700	807.601	-0.016014	0.0826651	-0.193722	0.846394	0.929104
PA14_12710	1015.1	0.0960563	0.0575143	1.67013	0.0948941	0.240686
PA14_12730	1396.37	-0.0322387	0.0653454	-0.493359	0.621759	0.809084
PA14_12750	1089.96	-0.186816	0.0721155	-2.59051	0.00958334	0.0357191
PA14_12760	805.53	-0.0750611	0.0664444	-1.12968	0.25861	0.485769
PA14_12770	1165.2	0.042049	0.0693779	0.606086	0.544457	0.757668
PA14_12780	114.933	0.0686183	0.16237	0.422605	0.672583	0.841901
PA14_12810	22836.7	-0.0378656	0.0331439	-1.14246	0.253263	0.479051
PA14_12820	988.157	0.00270006	0.0673966	0.0400623	0.968043	0.98697
PA14_12840	2930.57	0.00540502	0.0442075	0.122265	0.902689	0.956898
PA14_12850	3.25859	-0.397583	0.985196	-0.403557	0.686539	0.850457
PA14_12860	231.347	-1.45607	0.131562	-11.0675	1.80388e-28	3.01566e-27
PA14_12870	5667.41	-0.0447714	0.0385259	-1.16211	0.24519	0.46893
PA14_12890	1110.76	0.21465	0.0776781	2.76332	0.00572158	0.0223669
PA14_12900	1389.26	-0.0148515	0.0628855	-0.236167	0.813303	0.915227
PA14_12910	46.3446	0.151666	0.315219	0.481145	0.630414	0.814683
PA14_12920	3616.77	-0.13495	0.0524243	-2.57418	0.0100477	0.0372302
PA14_12940	2030.35	0.0564071	0.0565256	0.997903	0.318327	0.554697
PA14_12960	1223.64	0.0531628	0.0551538	0.963902	0.335095	0.569721
PA14_12970	1861.24	-0.135619	0.07029	-1.92942	0.0536792	0.154644
PA14_12980	340.193	0.0779862	0.117318	0.664741	0.506216	0.731406
PA14_12990	980.779	0.00136087	0.0751319	0.018113	0.985549	0.993237
PA14_13000	554.642	0.102676	0.0868898	1.18168	0.237334	0.459575
PA14_13010	930.583	-0.0246899	0.0788046	-0.313305	0.754049	0.883865
PA14_13030	112.529	0.719687	0.197365	3.64648	0.000265856	0.0013072
PA14_13040	845.377	0.161721	0.0833929	1.93926	0.0524695	0.152006
PA14_13050	746.206	0.0749909	0.0720666	1.04058	0.298072	0.533451
PA14_13060	5276.3	0.0257076	0.0546219	0.470647	0.637893	0.818646
PA14_13070	387.099	-0.0303552	0.0908139	-0.334257	0.738186	0.877521
PA14_13090	618.47	0.073927	0.0738523	1.00101	0.316822	0.553844
PA14_13110	718.985	0.331085	0.0794557	4.16691	3.08755e-05	0.000172055
PA14_13130	1836.21	0.0142018	0.0479858	0.295958	0.767262	0.890387
PA14_13140	676.234	-0.701823	0.0807663	-8.68955	3.63876e-18	4.35425e-17
PA14_13150	1024.21	-0.0243914	0.0589623	-0.413677	0.679111	0.846134
PA14_13170	3856.9	0.117151	0.0601357	1.9481	0.0514026	0.149449
PA14_13200	168.014	-0.192364	0.133582	-1.44005	0.149854	0.337602
PA14_13210	2554.3	0.0734238	0.0433526	1.69364	0.0903331	0.232648
PA14_13220	1883.65	-0.0275908	0.0513204	-0.537618	0.590841	0.78668
PA14_13230	550.821	0.0408824	0.0874891	0.467286	0.640295	0.820432
PA14_13240	1649.94	-0.00942248	0.0531447	-0.177299	0.859274	0.935116
PA14_13250	3557.47	0.89656	0.0435097	20.606	2.42664e-94	1.02171e-92
PA14_13260	153.653	0.185051	0.150597	1.22879	0.219152	0.436557
PA14_13280	1032.7	0.0258536	0.0967895	0.267112	0.789383	0.899546
PA14_13290	90.9195	-0.20985	0.16533	-1.26929	0.204339	0.417541
PA14_13300	906.641	0.0128084	0.109413	0.117064	0.906809	0.958696
PA14_13320	4821	0.0831744	0.038192	2.1778	0.0294211	0.0944289
PA14_13330	3144.55	0.628441	0.0407697	15.4144	1.30936e-53	3.38292e-52
PA14_13340	1045.88	-0.0451613	0.079358	-0.569083	0.5693	0.773399
PA14_13350	785.785	-1.17734	0.079438	-14.8209	1.07403e-49	2.59779e-48
PA14_13360	1314.26	-0.385941	0.0571162	-6.75713	1.40756e-11	1.2988e-10
PA14_13370	3736.37	0.143194	0.052491	2.72798	0.00637241	0.0247241
PA14_13380	34.1895	-0.00961821	0.296186	-0.0324735	0.974094	0.98897
PA14_13390	547.889	0.0769319	0.0751792	1.02331	0.30616	0.543912
PA14_13410	782.971	0.0923896	0.0653659	1.41342	0.157532	0.34977
PA14_13420	1397.13	-0.210021	0.0561869	-3.7379	0.000185562	0.000945951
PA14_13430	1221.05	0.831642	0.0635713	13.082	4.17101e-39	8.3479e-38
PA14_13450	1458.6	0.268104	0.0707495	3.78948	0.000150961	0.000774423
PA14_13460	104.742	0.0715236	0.183038	0.390757	0.695977	0.85719
PA14_13470	2315.45	0.0218088	0.0580724	0.375544	0.707256	0.861749
PA14_13490	1880.16	0.247826	0.147486	1.68034	0.0928905	0.237314
PA14_13500	2861.78	-0.0631792	0.0437124	-1.44534	0.148363	0.335973
PA14_13510	1496.73	0.0533335	0.060586	0.880294	0.3787	0.612558
PA14_13520	1077.53	-0.0228548	0.0633941	-0.360519	0.718459	0.866545
PA14_13530	1867.71	0.165057	0.0520037	3.17394	0.00150382	0.00665193
PA14_13560	1298.08	0.0916815	0.0552136	1.66049	0.0968164	0.244471
PA14_13580	2879.07	-0.0851825	0.0806413	-1.05631	0.290825	0.525751
PA14_13590	1567.07	-0.0722436	0.0543556	-1.32909	0.183818	0.38812
PA14_13600	531.749	-0.0489621	0.095254	-0.514016	0.607241	0.798972
PA14_13610	813.115	-1.79193	0.0776728	-23.0702	9.22061e-118	4.80825e-116
PA14_13620	374.061	-0.0422599	0.0901593	-0.468724	0.639267	0.819669
PA14_13630	627.402	0.335319	0.0823983	4.06949	4.7116e-05	0.000258003
PA14_13650	385.868	-0.108007	0.0978579	-1.10371	0.269719	0.498999
PA14_13660	40.5039	-0.388544	0.299963	-1.29531	0.195214	0.405451
PA14_13670	172.308	-0.0804243	0.142485	-0.564439	0.572455	0.774371
PA14_13680	563.268	0.248626	0.0904687	2.7482	0.00599226	0.0233768
PA14_13690	1655.12	0.0561448	0.0685626	0.818884	0.412852	0.644734
PA14_13710	1530.82	-0.0477517	0.0752961	-0.634186	0.52596	0.744319
PA14_13720	838.902	-0.0688287	0.0807254	-0.852628	0.393866	0.628681
PA14_13730	4.82098	0.403268	0.876891	0.459884	0.6456	0.823886
PA14_13740	3882.63	-0.00798525	0.0402015	-0.198631	0.842552	0.926714
PA14_13750	1.51081	1.14337	1.80188	0.634544	0.525726	0.744319
PA14_13770	2747.27	-0.0141645	0.0797031	-0.177716	0.858946	0.934939
PA14_13780	465.123	-0.159273	0.0879409	-1.81113	0.0701205	0.19125
PA14_13800	290.89	0.00567209	0.0968043	0.0585934	0.953276	0.980846
PA14_13810	573.96	0.0777627	0.0815091	0.954036	0.340065	0.57374
PA14_13830	256.507	-0.206234	0.127673	-1.61533	0.106239	0.26232
PA14_13840	4575.19	-0.0335159	0.0547892	-0.611725	0.54072	0.755627
PA14_13850	608.56	0.106441	0.0786736	1.35294	0.176074	0.37809
PA14_13860	584.511	0.066103	0.0821919	0.804252	0.421251	0.651535
PA14_13870	3539.03	-0.17175	0.0410377	-4.18519	2.84927e-05	0.000159402
PA14_13880	914.561	0.145924	0.0666352	2.18989	0.0285323	0.0919897
PA14_13890	1847.81	0.0606431	0.0724047	0.837558	0.402279	0.636391
PA14_13900	2301.42	0.0234577	0.0526429	0.4456	0.655886	0.831599
PA14_13910	2646.63	-0.0184848	0.0589685	-0.313469	0.753924	0.883865
PA14_13920	1181.49	0.100097	0.0596173	1.679	0.0931521	0.237647
PA14_13940	3502.61	0.0175072	0.0469065	0.373236	0.708973	0.862357
PA14_13950	1734.94	-0.0652196	0.0581389	-1.12179	0.261952	0.489299
PA14_13960	1173.78	-0.0346124	0.0561292	-0.616655	0.537462	0.75261
PA14_13970	5378.04	0.0658922	0.0536312	1.22862	0.219215	0.436557
PA14_13990	1392.97	0.302597	0.0678919	4.45705	8.30969e-06	4.94579e-05
PA14_14000	4722.02	-0.137556	0.0370152	-3.71619	0.00020225	0.00102005
PA14_14010	990.114	0.0911359	0.079292	1.14937	0.250403	0.475923
PA14_14020	414.096	-0.976206	0.0909003	-10.7393	6.65463e-27	1.0625e-25
PA14_14040	1765.68	-0.110379	0.0478072	-2.30883	0.0209531	0.0707229
PA14_14060	2255.25	0.115023	0.0692245	1.66159	0.0965946	0.244128
PA14_14080	1462.61	0.359403	0.0545491	6.58862	4.43947e-11	3.99904e-10
PA14_14100	699.675	0.0750474	0.0693576	1.08204	0.279236	0.511993
PA14_14130	1550.81	-0.00752824	0.0638215	-0.117958	0.906101	0.958548
PA14_14140	124.422	0.460446	0.168773	2.72819	0.00636835	0.0247241
PA14_14150	1351.19	0.207773	0.0590493	3.51863	0.000433774	0.00205636
PA14_14160	1052.94	0.040132	0.0638576	0.628462	0.529701	0.747427
PA14_14170	569.628	0.169322	0.0892507	1.89715	0.0578086	0.164704
PA14_14210	248.217	0.208567	0.125958	1.65584	0.0977543	0.246183
PA14_14220	757.28	0.291471	0.0645308	4.51678	6.27872e-06	3.78454e-05
PA14_14230	107.287	-0.759405	0.170764	-4.4471	8.70374e-06	5.1641e-05
PA14_14250	439.091	0.0526261	0.0913722	0.575953	0.564647	0.770392
PA14_14270	850.786	-0.135195	0.0784961	-1.72231	0.0850134	0.222645
PA14_14280	86.3046	-0.173746	0.184985	-0.939241	0.347607	0.581117
PA14_14290	1512.84	0.0580597	0.0562681	1.03184	0.302146	0.538708
PA14_14300	3229.77	0.0333099	0.049387	0.674467	0.500015	0.726626
PA14_14310	1275.54	0.0871734	0.0853384	1.0215	0.307016	0.545167
PA14_14320	62.1703	0.308834	0.25835	1.19541	0.231927	0.454108
PA14_14330	158.613	-0.21075	0.130326	-1.61709	0.105858	0.261722
PA14_14340	2576.65	-0.0157032	0.0449667	-0.349218	0.726926	0.871698
PA14_14360	471.159	0.128871	0.086374	1.49201	0.135697	0.313537
PA14_14370	1574.86	-0.111926	0.0582425	-1.92173	0.0546403	0.156935
PA14_14380	2250.44	0.0212469	0.0579543	0.366615	0.713906	0.865368
PA14_14390	226.079	-0.0224324	0.124205	-0.180608	0.856675	0.934221
PA14_14420	1132.09	0.0215696	0.0742685	0.290428	0.771489	0.892378
PA14_14430	452.193	0.296287	0.298683	0.991977	0.321209	0.557481
PA14_14440	686.194	0.836904	0.0865859	9.66559	4.22168e-22	5.75444e-21
PA14_14450	1973.56	0.0581142	0.0748008	0.77692	0.437206	0.669111
PA14_14460	1173.85	-0.00350546	0.0637746	-0.0549665	0.956165	0.981727
PA14_14470	1646.03	-0.13303	0.0648768	-2.0505	0.0403161	0.122478
PA14_14480	3022.62	-0.0235555	0.0451069	-0.522215	0.601521	0.794757
PA14_14490	1461.99	-0.0437694	0.0605212	-0.723208	0.469552	0.700524
PA14_14500	2.79559	-4.90214	1.33828	-3.66301	0.000249266	0.0012374
PA14_14510	1083.04	-0.234011	0.0626593	-3.73465	0.000187977	0.000955689
PA14_14520	508.198	-0.475242	0.105096	-4.52199	6.12614e-06	3.69649e-05
PA14_14530	1693.59	-0.10484	0.0615043	-1.70459	0.0882711	0.228997
PA14_14540	2002.01	-0.0627533	0.0557738	-1.12514	0.26053	0.487764
PA14_14550	629.415	0.647686	0.10709	6.04807	1.46595e-09	1.19719e-08
PA14_14560	1110.49	0.248813	0.0714817	3.48079	0.000499934	0.00235624
PA14_14570	1085.72	-1.16197	0.0844856	-13.7534	4.85647e-43	1.04167e-41
PA14_14590	281.695	-0.0270629	0.112833	-0.239848	0.810448	0.913556
PA14_14600	361.863	-0.354764	0.115589	-3.06919	0.00214639	0.00921455
PA14_14610	249.582	-0.860986	0.107088	-8.03998	8.98518e-16	1.01333e-14
PA14_14630	1916.03	-3.13346	0.0643659	-48.682	0	0
PA14_14650	1399.96	0.167417	0.0605718	2.76394	0.00571081	0.0223402
PA14_14660	1436.51	-0.185503	0.0631813	-2.93604	0.00332435	0.0137423
PA14_14680	148.484	-2.145	0.164319	-13.0538	6.04162e-39	1.20072e-37
PA14_14690	1236.48	0.0581594	0.0666283	0.872894	0.382721	0.61713
PA14_14700	699.839	-0.0611185	0.0701116	-0.871731	0.383355	0.617803
PA14_14710	384.273	-1.80231	0.113482	-15.8819	8.45644e-57	2.27803e-55
PA14_14730	87.0737	-9.8624	1.03644	-9.51567	1.80551e-21	2.40904e-20
PA14_14740	0.457103	-2.30464	2.79129	-0.825654	0.409	0.641437
PA14_14750	578.196	-0.215833	0.0890761	-2.42302	0.0153923	0.0541732
PA14_14770	1579.64	0.0629289	0.0691355	0.910225	0.362704	0.596908
PA14_14780	302.194	-0.219465	0.11044	-1.98718	0.0469023	0.138634
PA14_14800	1159.58	-0.0900873	0.0630471	-1.42889	0.153036	0.342329
PA14_14810	2855.73	-0.000427693	0.0473769	-0.00902746	0.992797	0.996655
PA14_14820	19.2483	-1.60022	0.399288	-4.00767	6.13194e-05	0.000330997
PA14_14830	756.44	-0.321203	0.0933163	-3.44209	0.000577231	0.00270262
PA14_14850	353.277	-1.31416	0.269581	-4.87482	1.08908e-06	7.11531e-06
PA14_14860	5.96019	-5.9943	1.17616	-5.0965	3.45982e-07	2.3665e-06
PA14_14880	391.709	-1.9103	0.110397	-17.3039	4.39876e-67	1.32289e-65
PA14_14890	2053	0.00621335	0.0462232	0.134421	0.89307	0.95167
PA14_14930	401.318	1.18321	0.0932027	12.695	6.29898e-37	1.22196e-35
PA14_14940	158.813	0.410983	0.145544	2.82378	0.00474614	0.0189579
PA14_14960	1623.81	-0.118585	0.051349	-2.3094	0.0209215	0.0706644
PA14_14975	2053.45	-0.237778	0.0520307	-4.56996	4.87818e-06	2.96551e-05
PA14_14990	2672.53	0.0335079	0.0576636	0.581092	0.561178	0.769296
PA14_15000	1367.19	0.0115673	0.0645916	0.179083	0.857872	0.934561
PA14_15020	2697.59	0.0779864	0.0693787	1.12407	0.260984	0.488131
PA14_15030	2572.33	0.0496269	0.0527764	0.940324	0.347051	0.580616
PA14_15050	351.422	0.201871	0.143636	1.40543	0.159894	0.353358
PA14_15070	348.399	0.488853	0.108587	4.50193	6.73377e-06	4.03742e-05
PA14_15080	1581.45	-0.00641971	0.0546133	-0.117548	0.906425	0.958689
PA14_15090	550.748	-1.77629	0.0904066	-19.6478	6.03881e-86	2.30366e-84
PA14_15100	1808.42	-0.0622984	0.054856	-1.13567	0.256094	0.483119
PA14_15110	391.957	-0.033312	0.10937	-0.304581	0.760685	0.88594
PA14_15120	399.737	0.216208	0.0934315	2.31408	0.0206633	0.0699525
PA14_15130	137.029	0.285186	0.165517	1.72299	0.0848895	0.222584
PA14_15140	591.89	0.0951303	0.214292	0.443929	0.657094	0.832758
PA14_15150	2539.58	0.0633709	0.0561308	1.12899	0.258904	0.48585
PA14_15160	241.922	-0.149985	0.10745	-1.39585	0.162758	0.35788
PA14_15180	77.6946	0.0602822	0.236691	0.254688	0.798964	0.90645
PA14_15190	0.887621	1.59211	1.91599	0.830956	0.405999	0.63926
PA14_15200	932.936	0.0697097	0.0661204	1.05428	0.291753	0.52641
PA14_15210	6542.74	0.309099	0.082761	3.73484	0.000187831	0.000955689
PA14_15230	336.692	-0.00784725	0.10797	-0.0726797	0.942061	0.974962
PA14_15240	1711.14	0.0484926	0.0494364	0.98091	0.326637	0.562816
PA14_15250	14345	0.0413614	0.0333102	1.2417	0.214346	0.431119
PA14_15260	141.445	0.408101	0.142972	2.85441	0.00431173	0.0174557
PA14_15270	550.232	-0.236324	0.107368	-2.20108	0.0277304	0.089863
PA14_15280	2940.91	0.0341351	0.0508531	0.67125	0.502062	0.728107
PA14_15290	248.633	0.271003	0.137862	1.96575	0.0493276	0.144391
PA14_15310	46.4504	-3.99253	0.407105	-9.80715	1.04894e-22	1.45419e-21
PA14_15340	118.475	-1.98695	0.177491	-11.1947	4.33036e-29	7.39152e-28
PA14_15350	99.7394	-0.147799	0.178258	-0.829131	0.40703	0.640052
PA14_15360	1009.6	0.121669	0.0683253	1.78073	0.0749565	0.201797
PA14_15370	2295.6	-0.00105993	0.0507097	-0.020902	0.983324	0.992726
PA14_15380	1779.78	0.468662	0.0645278	7.26295	3.78749e-13	3.80355e-12
PA14_15400	2146.95	0.0405553	0.0492314	0.823768	0.410071	0.64246
PA14_15410	2613.8	0.00675791	0.048954	0.138046	0.890204	0.950755
PA14_15420	92.9564	-0.000711891	0.193986	-0.0036698	0.997072	0.998677
PA14_15430	1398.84	-0.0332941	0.0898518	-0.370545	0.710977	0.863318
PA14_15435	362.303	0.0432165	0.0981674	0.440232	0.659769	0.834846
PA14_15445	2876.42	0.0643028	0.0658939	0.975853	0.329138	0.564118
PA14_15450	4099.64	0.419248	0.0442705	9.47014	2.79459e-21	3.69405e-20
PA14_15460	5514.59	0.108695	0.0569629	1.90817	0.0563696	0.161169
PA14_15470	59.8243	-0.993838	0.23682	-4.19659	2.70962e-05	0.000152339
PA14_15475	566.197	-0.030625	0.0787139	-0.389068	0.697226	0.857613
PA14_15480	123.053	0.147521	0.15303	0.964006	0.335043	0.569721
PA14_15490	1380.71	0.350201	0.0587129	5.96465	2.45166e-09	1.96548e-08
PA14_15500	5884.62	0.0821985	0.0409339	2.00808	0.0446348	0.133669
PA14_15510	392.392	1.14064	0.109967	10.3725	3.30645e-25	4.99836e-24
PA14_15520	1729.73	-0.0209747	0.054419	-0.385431	0.699918	0.857954
PA14_15530	918.71	0.357033	0.0872426	4.09241	4.26905e-05	0.000235129
PA14_15540	1002.18	-0.0337592	0.062369	-0.541282	0.588313	0.78497
PA14_15560	4241.1	0.147429	0.0581646	2.53469	0.0112548	0.0411134
PA14_15570	13191.2	-0.0196384	0.0508709	-0.386043	0.699465	0.857916
PA14_15580	366.016	-0.700637	0.11001	-6.36884	1.90466e-10	1.66044e-09
PA14_15590	8575.24	0.225417	0.03757	5.99991	1.97426e-09	1.58722e-08
PA14_15600	186.674	-6.43804	0.371955	-17.3087	4.0477e-67	1.22378e-65
PA14_15610	5358.49	-0.00757784	0.0424772	-0.178398	0.858411	0.93481
PA14_15620	3444.2	0.00294219	0.0520647	0.0565104	0.954935	0.980996
PA14_15630	48.9313	-1.0575	0.254738	-4.15134	3.30538e-05	0.000183654
PA14_15650	1434.1	0.228285	0.0674669	3.38366	0.00071527	0.00331885
PA14_15660	652.199	0.0676651	0.0915721	0.738927	0.459951	0.690717
PA14_15670	760.958	-1.78819	0.0770923	-23.1955	5.05536e-119	2.68548e-117
PA14_15680	495.828	-0.199296	0.0974297	-2.04553	0.0408023	0.123628
PA14_15700	1544.46	-0.0113564	0.0629377	-0.180439	0.856808	0.934221
PA14_15710	762.575	0.0460875	0.0939871	0.490359	0.62388	0.810037
PA14_15720	519.009	0.0850511	0.0812735	1.04648	0.29534	0.530063
PA14_15750	204.453	-0.197329	0.127057	-1.55307	0.120406	0.287437
PA14_15770	682.415	0.101585	0.0884503	1.1485	0.250761	0.476061
PA14_15780	1185.01	-0.0560895	0.0680143	-0.824673	0.409557	0.641832
PA14_15790	29.981	-0.15216	0.320953	-0.474086	0.635438	0.816378
PA14_15810	2944.92	0.0621028	0.056157	1.10588	0.268779	0.497797
PA14_15820	35.6985	0.0468208	0.308825	0.15161	0.879495	0.947023
PA14_15830	2760.7	0.302925	0.051277	5.90761	3.471e-09	2.75162e-08
PA14_15840	533.908	0.00737172	0.0835104	0.0882732	0.92966	0.969907
PA14_15850	58.7031	-0.00450716	0.236532	-0.0190552	0.984797	0.993184
PA14_15860	837.241	0.334477	0.118349	2.82618	0.00471065	0.0188293
PA14_15870	312.408	-0.292811	0.104153	-2.81137	0.00493317	0.0196497
PA14_15880	82.754	-1.14075	0.196093	-5.81739	5.97719e-09	4.63497e-08
PA14_15890	409.737	-4.25145	0.141226	-30.1039	4.30915e-199	4.99862e-197
PA14_15910	3735.81	-0.0369067	0.0432281	-0.853766	0.393235	0.628556
PA14_15920	1444.09	0.239298	0.0682934	3.50397	0.000458372	0.00216574
PA14_15930	492.629	-0.175305	0.0838142	-2.09159	0.0364755	0.112555
PA14_15960	129.79	-2.05202	0.174724	-11.7444	7.54575e-32	1.36159e-30
PA14_15970	309.796	0.166223	0.103829	1.60092	0.109394	0.267553
PA14_15980	409.293	-6.07315	0.236185	-25.7135	8.25789e-146	5.86723e-144
PA14_15990	598.622	0.968197	0.0925113	10.4657	1.24146e-25	1.90715e-24
PA14_16000	260.351	-0.839989	0.133637	-6.28559	3.26616e-10	2.80013e-09
PA14_16010	6395.64	0.368234	0.034511	10.6701	1.40542e-26	2.20674e-25
PA14_16020	51.1992	-0.0928691	0.250827	-0.370251	0.711195	0.863399
PA14_16030	32.0308	0.209428	0.319157	0.65619	0.511702	0.735774
PA14_16040	738.464	-0.901104	0.0886801	-10.1613	2.95147e-24	4.33492e-23
PA14_16050	496.637	0.323309	0.106288	3.04183	0.00235142	0.0100341
PA14_16070	2847.79	-0.0259553	0.0524307	-0.49504	0.620572	0.808279
PA14_16090	524.48	-0.171824	0.0893864	-1.92226	0.0545724	0.15682
PA14_16100	1334.4	0.409593	0.0942411	4.34623	1.38499e-05	8.08243e-05
PA14_16110	6000.72	0.0349811	0.0512144	0.683033	0.494586	0.721567
PA14_16130	1001.77	-0.0695127	0.0586532	-1.18515	0.235959	0.458369
PA14_16140	591.732	-0.041339	0.0751036	-0.550426	0.582027	0.781095
PA14_16150	4378.4	0.0367739	0.0590724	0.622523	0.533598	0.749993
PA14_16160	239.016	-0.000696203	0.122436	-0.00568623	0.995463	0.997776
PA14_16180	776.403	0.157385	0.0822369	1.9138	0.0556461	0.159502
PA14_16190	1058.84	-0.0300724	0.0650656	-0.462185	0.643948	0.822887
PA14_16200	1992.66	1.24844	0.049507	25.2174	2.57911e-140	1.76623e-138
PA14_16210	1214.41	-0.045636	0.083228	-0.548325	0.583469	0.781444
PA14_16220	178.127	-0.0259805	0.126233	-0.205814	0.836937	0.924314
PA14_16250	1577.63	-0.020183	0.0572659	-0.352444	0.724505	0.869459
PA14_16260	414.771	0.209372	0.320076	0.654131	0.513027	0.736374
PA14_16270	369.892	0.0800322	0.0962253	0.831717	0.405569	0.639106
PA14_16280	208.617	0.667633	0.128518	5.19487	2.04862e-07	1.4355e-06
PA14_16290	3963.04	-0.0292564	0.0505069	-0.579255	0.562417	0.769847
PA14_16300	1691.35	0.0816797	0.0716187	1.14048	0.254086	0.479969
PA14_16310	1011.26	0.0985102	0.0739118	1.33281	0.182595	0.3864
PA14_16320	1183.27	-0.00960964	0.0685792	-0.140125	0.888561	0.950755
PA14_16330	2368.35	0.129831	0.0584572	2.22096	0.0263538	0.0861387
PA14_16350	696.984	0.0270424	0.0831403	0.325262	0.744983	0.879801
PA14_16360	1859.23	-0.20263	0.0543494	-3.72829	0.000192782	0.000975753
PA14_16370	1646.53	-0.0101814	0.0494853	-0.205747	0.836989	0.924314
PA14_16380	1469.54	0.0241566	0.0592674	0.407587	0.683577	0.849314
PA14_16390	613.098	0.0201588	0.0725862	0.277722	0.781226	0.896547
PA14_16410	868.619	0.168248	0.0636875	2.64178	0.00824726	0.0311478
PA14_16430	1533.78	0.0812249	0.0605225	1.34206	0.179576	0.382634
PA14_16440	266.456	0.624023	0.115259	5.41408	6.16046e-08	4.44931e-07
PA14_16450	1872.6	0.0395774	0.0516833	0.765768	0.443814	0.675784
PA14_16460	39.5541	-0.0982382	0.269523	-0.364489	0.715493	0.865473
PA14_16470	1996.59	0.317969	0.274233	1.15949	0.246258	0.47034
PA14_16480	4668.13	0.24044	0.0395104	6.08549	1.16137e-09	9.56701e-09
PA14_16500	1499.03	0.236995	0.0606285	3.90896	9.26927e-05	0.000489197
PA14_16510	653.391	-1.18438	0.0863335	-13.7186	7.8527e-43	1.66547e-41
PA14_16530	16.3253	-7.44755	1.08101	-6.88945	5.60075e-12	5.28815e-11
PA14_16550	1709.76	-0.0733063	0.0551691	-1.32876	0.183928	0.38821
PA14_16560	5312.19	0.0144233	0.046695	0.308884	0.75741	0.885558
PA14_16580	2919.79	0.130971	0.050771	2.57964	0.00989028	0.0367908
PA14_16590	213.015	-0.294591	0.118629	-2.4833	0.0130172	0.0467106
PA14_16600	595.435	-0.113974	0.098292	-1.15955	0.246232	0.47034
PA14_16610	1095.23	0.0122025	0.0605193	0.201629	0.840207	0.925789
PA14_16620	3635.14	0.437286	0.044184	9.89693	4.29246e-23	6.05418e-22
PA14_16630	1889.78	-0.270733	0.0558521	-4.84732	1.2514e-06	8.08947e-06
PA14_16640	195.976	0.161305	0.13002	1.24062	0.214747	0.431621
PA14_16660	1173.38	0.0233528	0.0635852	0.367268	0.713419	0.865248
PA14_16670	1572.1	-0.0491089	0.0511706	-0.95971	0.337201	0.571453
PA14_16680	2400.5	0.00904838	0.0585778	0.154468	0.877241	0.946647
PA14_16690	2446.38	0.00919599	0.0607649	0.151337	0.87971	0.947023
PA14_16700	10.0447	-3.63669	0.78123	-4.65508	3.23856e-06	2.00523e-05
PA14_16710	254.459	-3.04784	0.139156	-21.9023	2.46978e-106	1.15067e-104
PA14_16720	1875.1	0.0919877	0.0632701	1.45389	0.145977	0.332425
PA14_16730	32.6944	-0.240009	0.286835	-0.83675	0.402733	0.636755
PA14_16740	324.604	-0.0745343	0.108822	-0.68492	0.493394	0.720939
PA14_16750	291.411	-0.763887	0.103324	-7.39312	1.43422e-13	1.46621e-12
PA14_16770	84.9231	-0.193143	0.192884	-1.00134	0.316661	0.553844
PA14_16780	4667.79	-0.0414102	0.037772	-1.09632	0.272939	0.502717
PA14_16790	24285.3	0.126032	0.0573424	2.19788	0.0279579	0.090497
PA14_16800	636.467	-1.3184	0.0816771	-16.1416	1.30192e-58	3.57492e-57
PA14_16820	1721.81	0.383874	0.0545586	7.036	1.97841e-12	1.92556e-11
PA14_16830	3913.73	0.118609	0.0483955	2.45082	0.014253	0.0506339
PA14_16840	143.595	0.176251	0.147707	1.19325	0.232771	0.454898
PA14_16860	1124.28	0.0624103	0.0674346	0.925493	0.35471	0.588319
PA14_16870	285.923	-0.250967	0.116841	-2.14793	0.031719	0.100273
PA14_16880	1916.96	0.12581	0.0501596	2.5082	0.0121349	0.0438493
PA14_16890	3549.14	-0.136261	0.0451441	-3.01836	0.00254143	0.0107083
PA14_16910	1172.98	-0.202182	0.076944	-2.62766	0.00859748	0.032363
PA14_16930	315.628	0.0388215	0.103808	0.373976	0.708422	0.862172
PA14_16950	2415.75	-0.0234902	0.0456496	-0.514577	0.606849	0.79864
PA14_16960	22.3029	-0.0987293	0.366849	-0.269128	0.787832	0.899384
PA14_16970	3328.98	-0.0562234	0.0488017	-1.15208	0.249288	0.474569
PA14_16980	572.417	-0.0270015	0.0820809	-0.328962	0.742184	0.878358
PA14_16990	1855.89	0.0615453	0.0528174	1.16525	0.243919	0.467531
PA14_17000	2567.14	0.336413	0.0518211	6.4918	8.48145e-11	7.53259e-10
PA14_17010	1033.85	0.324568	0.172551	1.881	0.059972	0.169256
PA14_17030	276.75	0.139242	0.113381	1.22809	0.219413	0.436557
PA14_17040	547.465	0.0130885	0.0873526	0.149836	0.880894	0.94722
PA14_17050	1249	-0.573028	0.0737332	-7.77165	7.74693e-15	8.35551e-14
PA14_17060	570.616	-0.661937	0.102174	-6.47854	9.26166e-11	8.19989e-10
PA14_17100	250.254	-0.325038	0.124006	-2.62115	0.00876329	0.0329435
PA14_17110	174.04	-9.42288	0.985416	-9.56234	1.15127e-21	1.53973e-20
PA14_17120	735.641	0.139302	0.0791698	1.75953	0.0784873	0.20925
PA14_17130	3326.74	-0.348358	0.0556091	-6.2644	3.74273e-10	3.18945e-09
PA14_17140	650.975	0.527541	0.0809803	6.51443	7.2967e-11	6.49052e-10
PA14_17150	17.363	-7.53291	1.07717	-6.99324	2.68618e-12	2.56609e-11
PA14_17170	345.432	-5.31242	0.195907	-27.117	6.20798e-162	5.42864e-160
PA14_17180	301.224	-0.218251	0.114118	-1.9125	0.0558115	0.159895
PA14_17190	1319.26	-0.0478134	0.05602	-0.853506	0.393379	0.628557
PA14_17210	962.635	-6.73762	0.268514	-25.0922	6.04905e-139	3.998e-137
PA14_17230	2584.16	-0.00493102	0.0576963	-0.0854652	0.931892	0.970834
PA14_17250	7.72212	-0.0712383	0.808719	-0.0880878	0.929807	0.969907
PA14_17260	283.015	-0.346342	0.110349	-3.1386	0.00169755	0.00745665
PA14_17270	15.799	-6.67134	1.08542	-6.1463	7.93101e-10	6.60995e-09
PA14_17280	2200.82	-0.75301	0.0515246	-14.6146	2.26724e-48	5.32519e-47
PA14_17290	178.325	-0.431471	0.176682	-2.44208	0.0146031	0.0517159
PA14_17320	1406.55	-3.27624	0.0787941	-41.5797	0	0
PA14_17330	544.549	-2.14103	0.112804	-18.98	2.49586e-80	8.81148e-79
PA14_17340	3804.19	-0.711536	0.0467527	-15.2191	2.63997e-52	6.66915e-51
PA14_17350	678.709	0.0155608	0.07454	0.208757	0.834638	0.923132
PA14_17370	74.1387	-0.264965	0.247169	-1.072	0.28372	0.517544
PA14_17380	833.055	-0.0555754	0.0629092	-0.883422	0.377008	0.610994
PA14_17400	314.592	0.272385	0.128245	2.12394	0.0336754	0.105287
PA14_17410	2839.13	0.0288634	0.0436405	0.661389	0.508363	0.732573
PA14_17420	860.217	-0.282019	0.0679614	-4.14969	3.32923e-05	0.000184798
PA14_17440	2885	-0.0331692	0.048039	-0.690464	0.489903	0.717822
PA14_17450	3613.11	-0.0764784	0.0535098	-1.42924	0.152936	0.342239
PA14_17460	603.919	-0.0626264	0.0779695	-0.803216	0.42185	0.652284
PA14_17470	2946.99	-0.0103824	0.0425118	-0.244223	0.807058	0.911567
PA14_17480	1455.39	0.0458606	0.084177	0.544812	0.585883	0.78283
PA14_17490	245.888	-1.72808	0.125754	-13.7417	5.71138e-43	1.22043e-41
PA14_17500	3327.29	-0.0140363	0.0622728	-0.225401	0.821668	0.919367
PA14_17510	389.399	-0.151618	0.110962	-1.3664	0.171814	0.372176
PA14_17520	508.733	0.022631	0.0870644	0.259934	0.794915	0.903478
PA14_17530	970.314	0.752778	0.0701505	10.7309	7.28858e-27	1.16046e-25
PA14_17540	1120.24	0.0336533	0.0601987	0.559037	0.576137	0.777114
PA14_17550	1027.82	0.170018	0.0869165	1.95611	0.0504519	0.146986
PA14_17570	91.9207	0.039373	0.219966	0.178996	0.857941	0.934561
PA14_17580	428.414	0.0896793	0.0960469	0.933703	0.350457	0.584834
PA14_17590	805.626	-0.0150637	0.0737328	-0.204301	0.838119	0.92477
PA14_17600	238.875	-0.418598	0.110399	-3.79169	0.000149623	0.000768947
PA14_17610	4801.7	0.160331	0.049946	3.21009	0.00132695	0.00595293
PA14_17620	156.788	-0.014349	0.147772	-0.0971025	0.922645	0.966516
PA14_17630	1409.4	0.158305	0.0518496	3.05316	0.00226448	0.00969225
PA14_17640	8.70307	-0.241912	0.57585	-0.420096	0.674415	0.842871
PA14_17650	424.953	-0.0396487	0.0835236	-0.474701	0.635	0.816378
PA14_17660	2980.46	-0.0947307	0.0578272	-1.63817	0.101386	0.253088
PA14_17670	166.159	-0.22107	0.133738	-1.65301	0.0983287	0.247301
PA14_17690	66.6455	-0.0150851	0.207575	-0.0726726	0.942067	0.974962
PA14_17700	696.289	-0.201076	0.0934346	-2.15205	0.0313937	0.0995214
PA14_17710	993.735	0.20506	0.0659842	3.10772	0.00188538	0.00818055
PA14_17720	1337.81	0.00562618	0.0577964	0.0973449	0.922452	0.966492
PA14_17730	1553.34	0.170641	0.0715389	2.38529	0.0170657	0.0592194
PA14_17740	2422.3	0.109927	0.0505056	2.17653	0.0295158	0.0946771
PA14_17760	1091.22	-0.0412663	0.0642894	-0.641883	0.520949	0.742868
PA14_17780	3553.65	-0.042862	0.0467378	-0.917072	0.359105	0.593725
PA14_17790	1084.14	-0.283159	0.0589371	-4.80443	1.55193e-06	9.95615e-06
PA14_17810	1192.96	0.00837674	0.0672288	0.1246	0.90084	0.956007
PA14_17820	6838.71	0.119041	0.0644427	1.84723	0.0647137	0.179518
PA14_17850	694.436	-0.0132867	0.0793649	-0.167413	0.867045	0.940385
PA14_17860	575.478	0.084824	0.0968094	0.876197	0.380923	0.615104
PA14_17880	1151.6	-0.112086	0.0681586	-1.64449	0.100074	0.250472
PA14_17890	398.405	-0.45066	0.0984233	-4.57879	4.67668e-06	2.85218e-05
PA14_17900	1972.72	0.131174	0.0461021	2.84528	0.00443721	0.0179
PA14_17910	63.8747	0.323363	0.226838	1.42552	0.154006	0.343687
PA14_17920	321.68	0.130045	0.110197	1.18011	0.237955	0.460218
PA14_17930	412.675	-1.78102	0.101014	-17.6315	1.41253e-69	4.43582e-68
PA14_17940	1773.35	-2.371	0.0652411	-36.3422	3.49303e-289	9.45446e-287
PA14_17960	3885.23	-0.00100144	0.222766	-0.0044955	0.996413	0.998345
PA14_17990	3206.33	-0.108458	0.0542312	-1.99992	0.0455087	0.135501
PA14_18010	54.6496	-0.590848	0.235108	-2.51309	0.0119677	0.0433002
PA14_18020	675.993	0.180586	0.0791531	2.28148	0.0225201	0.0754743
PA14_18040	1779.57	0.167924	0.101513	1.65421	0.0980846	0.246796
PA14_18050	2857.4	-0.0772	0.0544227	-1.41853	0.156037	0.347537
PA14_18060	532.651	0.0165687	0.0749329	0.221114	0.825004	0.919788
PA14_18070	2127.09	0.100222	0.0594529	1.68573	0.0918478	0.235694
PA14_18080	501.325	0.207506	0.0989248	2.09761	0.0359397	0.111204
PA14_18090	540.958	-0.0868892	0.0912154	-0.952572	0.340807	0.574821
PA14_18100	182.469	-0.0824179	0.136006	-0.605986	0.544524	0.757668
PA14_18110	569.534	0.162107	0.0753494	2.1514	0.0314447	0.0996274
PA14_18120	659.359	-3.88354	0.107378	-36.1668	2.02386e-286	5.22892e-284
PA14_18140	1651.78	-0.0437814	0.0540615	-0.809844	0.41803	0.648494
PA14_18150	3265.15	0.0882196	0.0473385	1.86359	0.0623788	0.174575
PA14_18160	549.72	-0.760385	0.112312	-6.7703	1.28516e-11	1.18971e-10
PA14_18180	406.389	0.427209	0.0998986	4.27643	1.89915e-05	0.000109591
PA14_18200	41.7254	-0.110204	0.2835	-0.388726	0.697479	0.857613
PA14_18210	1521.61	0.111597	0.0759911	1.46856	0.141952	0.325345
PA14_18230	183.038	-0.17722	0.16586	-1.06849	0.285299	0.519257
PA14_18250	1295.61	0.316728	0.0561598	5.63976	1.70286e-08	1.27523e-07
PA14_18260	21.3278	-0.387551	0.351243	-1.10337	0.269867	0.498999
PA14_18275	5019.09	0.0756649	0.0488995	1.54735	0.121778	0.289615
PA14_18300	71.3159	0.182204	0.226545	0.804272	0.42124	0.651535
PA14_18310	3700.26	0.153675	0.0507977	3.02523	0.00248445	0.010515
PA14_18320	27.6789	-0.313868	0.38677	-0.811513	0.417071	0.648229
PA14_18330	313.2	0.251726	0.0978032	2.5738	0.0100587	0.0372468
PA14_18340	781.097	-0.00782372	0.0743146	-0.105278	0.916155	0.962996
PA14_18350	224.502	-0.0154258	0.111226	-0.138689	0.889696	0.950755
PA14_18360	714.216	0.0238207	0.0665452	0.357962	0.720371	0.867314
PA14_18370	328.809	0.186733	0.105509	1.76982	0.0767565	0.205697
PA14_18380	578.243	0.0393838	0.08228	0.478656	0.632183	0.815739
PA14_18450	226.21	-0.697127	0.115984	-6.01056	1.84879e-09	1.49481e-08
PA14_18470	5744.24	0.158892	0.0391612	4.0574	4.96225e-05	0.000270945
PA14_18480	647.982	0.348464	0.0744882	4.67811	2.89535e-06	1.80451e-05
PA14_18500	668.305	-0.141021	0.0835341	-1.68818	0.0913761	0.23459
PA14_18520	262.693	-0.147865	0.108764	-1.3595	0.173988	0.375171
PA14_18550	850.302	-0.0133388	0.0858441	-0.155384	0.876519	0.946094
PA14_18565	117.138	0.320549	0.170147	1.88395	0.0595717	0.168377
PA14_18580	5224.31	0.0221774	0.0656237	0.337948	0.735403	0.875962
PA14_18590	0.307228	-1.74954	3.50177	-0.499617	0.617345	0.805871
PA14_18600	2606.28	-0.451906	0.0530209	-8.52316	1.5526e-17	1.83854e-16
PA14_18610	3911.27	0.063459	0.046878	1.3537	0.175831	0.377996
PA14_18625	2647.98	0.0877831	0.0480583	1.8266	0.0677605	0.185615
PA14_18630	1344.19	0.00512072	0.0604807	0.0846669	0.932526	0.971048
PA14_18640	311.652	-4.64659	0.178006	-26.1036	3.32067e-150	2.55064e-148
PA14_18650	687.46	-0.37864	0.076709	-4.93606	7.97182e-07	5.27495e-06
PA14_18660	1245.12	0.0301657	0.0648947	0.464841	0.642046	0.82161
PA14_18670	2395.03	-0.0148066	0.082287	-0.179939	0.857201	0.934291
PA14_18680	915.453	0.133979	0.0620514	2.15916	0.0308381	0.0981982
PA14_18690	722.189	-0.0508332	0.086493	-0.587715	0.556724	0.767132
PA14_18700	1315.39	0.0192753	0.0533213	0.361494	0.71773	0.866152
PA14_18710	1492.2	-1.6631	0.0710723	-23.4	4.26916e-121	2.35591e-119
PA14_18720	749.862	0.389525	0.0755898	5.15314	2.56165e-07	1.78e-06
PA14_18740	1686.74	0.0637237	0.0638445	0.998108	0.318227	0.554697
PA14_18750	975.015	-0.0315239	0.0777154	-0.405632	0.685013	0.849522
PA14_18760	1192.6	-0.0225977	0.0747944	-0.302131	0.762552	0.886913
PA14_18780	2017.24	0.119112	0.050723	2.34829	0.0188597	0.0647104
PA14_18790	2626.55	0.0217882	0.0499341	0.436339	0.66259	0.835814
PA14_18800	1074.82	-0.0169538	0.0688048	-0.246404	0.805369	0.910445
PA14_18810	304.739	0.199526	0.111808	1.78454	0.0743366	0.200631
PA14_18820	377.697	0.0949732	0.100216	0.947688	0.343288	0.577379
PA14_18830	4836.94	0.238244	0.0477735	4.98694	6.13428e-07	4.09721e-06
PA14_18850	344.162	-0.23381	0.10591	-2.20762	0.0272705	0.0887266
PA14_18860	3740.69	-0.0339258	0.0481295	-0.704887	0.480881	0.711513
PA14_18870	1805.35	0.172611	0.0904054	1.9093	0.0562237	0.16088
PA14_18880	919.308	0.0722554	0.212234	0.340451	0.733517	0.874985
PA14_18900	2892.42	0.150509	0.0434942	3.46044	0.000539299	0.00253128
PA14_18920	23.7131	-0.486669	0.363109	-1.34028	0.180153	0.383517
PA14_18930	1738.64	-0.123733	0.0628668	-1.96818	0.0490473	0.143852
PA14_18950	297.655	-1.12247	0.110916	-10.12	4.50603e-24	6.55045e-23
PA14_18960	279.285	-0.0335545	0.122246	-0.274484	0.783712	0.897337
PA14_18970	215.169	-0.101538	0.120574	-0.842126	0.399718	0.633555
PA14_18985	235.876	-0.0493159	0.11951	-0.412652	0.679862	0.846481
PA14_19010	217.34	-0.147916	0.125473	-1.17886	0.238453	0.460695
PA14_19020	1580.21	0.0393835	0.0589886	0.667646	0.504359	0.729739
PA14_19030	746.931	0.14835	0.0942879	1.57337	0.115634	0.279329
PA14_19050	8.24598	-5.71172	1.15328	-4.9526	7.3228e-07	4.86248e-06
PA14_19090	839.736	-0.364552	0.0769117	-4.73988	2.13844e-06	1.35355e-05
PA14_19100	963.877	0.0202178	0.100559	0.201055	0.840656	0.926025
PA14_19110	766.292	-0.110322	0.0742512	-1.4858	0.137333	0.316674
PA14_19120	9374.39	0.350213	0.0499308	7.01397	2.31653e-12	2.23172e-11
PA14_19130	2195	0.409726	0.0696914	5.87916	4.12362e-09	3.23738e-08
PA14_19140	667.204	0.166772	0.0688361	2.42275	0.0154037	0.0541798
PA14_19150	456.223	0.00254654	0.11478	0.0221862	0.982299	0.992726
PA14_19160	855.657	0.298429	0.0781592	3.81822	0.00013442	0.000694583
PA14_19170	230.947	0.0179893	0.119652	0.150347	0.880491	0.947023
PA14_19190	1980.86	0.061879	0.0755583	0.818957	0.412811	0.644734
PA14_19205	354.735	0.284893	0.101973	2.7938	0.00520932	0.0205738
PA14_19210	92.0868	0.192343	0.18749	1.02588	0.304947	0.542679
PA14_19270	549.381	0.10831	0.0973446	1.11264	0.265861	0.494164
PA14_19290	899.397	1.09298	0.0718447	15.2131	2.89628e-52	7.28427e-51
PA14_19310	1258.1	0.0504439	0.08552	0.58985	0.555291	0.76613
PA14_19320	1438.88	0.0331982	0.0554531	0.598671	0.549392	0.761274
PA14_19330	874.053	-0.159337	0.0767568	-2.07587	0.0379058	0.116024
PA14_19340	2042.82	-0.00105537	0.0577119	-0.0182869	0.98541	0.993237
PA14_19350	290.18	0.271925	0.157236	1.72941	0.0837361	0.220452
PA14_19360	1004.17	-0.0409007	0.0654441	-0.624972	0.531989	0.749008
PA14_19370	14463.7	0.0412172	0.0527246	0.781745	0.434364	0.666557
PA14_19380	1846.34	0.0895453	0.182619	0.49034	0.623894	0.810037
PA14_19390	579.546	0.0427365	0.0864047	0.494609	0.620876	0.808491
PA14_19400	879.651	0.104724	0.0785145	1.33382	0.182264	0.385842
PA14_19410	644.527	0.0332884	0.0940307	0.354016	0.723327	0.869287
PA14_19430	34.9774	0.189903	0.295636	0.642355	0.520643	0.742724
PA14_19450	1138.4	0.105166	0.0624462	1.6841	0.0921615	0.235967
PA14_19470	4916.33	0.077585	0.0642016	1.20846	0.22687	0.447453
PA14_19490	139.865	-0.277551	0.172184	-1.61195	0.106973	0.263676
PA14_19500	1715.15	0.193638	0.0646271	2.99624	0.00273331	0.0114562
PA14_19510	77.3842	0.29765	0.234496	1.26932	0.204328	0.417541
PA14_19520	1769.21	0.114578	0.0544051	2.10601	0.0352032	0.109282
PA14_19530	1004.3	-1.52231	0.0736506	-20.6693	6.54117e-95	2.77463e-93
PA14_19540	1835.36	0.0183103	0.0474758	0.385677	0.699736	0.857916
PA14_19560	1086.47	0.395379	0.0953988	4.14448	3.40586e-05	0.000188833
PA14_19570	910.35	0.302618	0.0695602	4.35045	1.35856e-05	7.94452e-05
PA14_19580	326.417	-0.122585	0.123622	-0.991615	0.321385	0.557617
PA14_19590	1202.82	0.0237538	0.0627981	0.378257	0.705239	0.861537
PA14_19600	729.17	0.00450353	0.0667032	0.067516	0.946171	0.977373
PA14_19610	1014.6	-0.0468696	0.067514	-0.69422	0.487544	0.716443
PA14_19620	813.547	0.0775642	0.0739468	1.04892	0.294215	0.529382
PA14_19630	1248.3	0.046142	0.0603742	0.764267	0.444708	0.676223
PA14_19640	274.044	0.246686	0.102226	2.41315	0.0158154	0.055388
PA14_19650	1024.63	0.426236	0.0748993	5.69078	1.2646e-08	9.55851e-08
PA14_19660	50.6689	0.277762	0.27412	1.01329	0.310923	0.549861
PA14_19670	531.952	0.155802	0.0861964	1.80753	0.0706801	0.192315
PA14_19680	2022.98	0.00234038	0.0612173	0.0382308	0.969504	0.987247
PA14_19690	808.051	0.0018865	0.0800467	0.0235675	0.981198	0.992726
PA14_19700	5.81318	0.521699	0.735593	0.709222	0.478187	0.708924
PA14_19710	309.688	-0.0595746	0.0997191	-0.597424	0.550224	0.762241
PA14_19720	1327.44	-0.0230009	0.0577296	-0.398424	0.690318	0.853678
PA14_19730	480.754	0.159864	0.0873694	1.82975	0.067287	0.184665
PA14_19740	523.368	-2.91274	0.116935	-24.909	5.94534e-137	3.797e-135
PA14_19750	1355.73	-0.0888454	0.0733665	-1.21098	0.225903	0.446309
PA14_19770	460.07	-0.0868827	0.0860427	-1.00976	0.312609	0.551397
PA14_19800	1066.43	0.183413	0.0616756	2.97384	0.002941	0.0122287
PA14_19810	1889.13	0.0884045	0.0514445	1.71845	0.0857155	0.224209
PA14_19850	148.615	0.175868	0.148734	1.18243	0.237035	0.459361
PA14_19860	407.124	-0.0876417	0.0893514	-0.980866	0.326659	0.562816
PA14_19870	704.627	0.0262485	0.0668574	0.392604	0.694612	0.856437
PA14_19900	1134.12	0.276651	0.0610737	4.52979	5.90427e-06	3.5702e-05
PA14_19910	959.718	0.171626	0.0758654	2.26224	0.0236827	0.0786288
PA14_19920	559.453	-1.0776	0.0910541	-11.8347	2.58329e-32	4.67624e-31
PA14_19940	2824.72	-0.0685715	0.0492401	-1.39259	0.163742	0.359666
PA14_19950	1628.24	0.00214557	0.0588809	0.0364391	0.970932	0.987247
PA14_19960	2143.93	1.00713	0.0483377	20.8353	2.07416e-96	8.93146e-95
PA14_19970	663.589	-0.259889	0.086496	-3.00463	0.00265903	0.0111707
PA14_19990	2812.33	-0.0917794	0.390158	-0.235236	0.814025	0.915304
PA14_20000	1142.27	-0.136465	0.0880049	-1.55066	0.120984	0.288574
PA14_20010	6351.5	0.00300305	0.0402925	0.0745312	0.940588	0.97466
PA14_20020	1393.31	0.3308	0.0560389	5.90305	3.56839e-09	2.82097e-08
PA14_20030	2431.87	-0.05498	0.0487138	-1.12863	0.259053	0.48596
PA14_20040	1897.4	0.201087	0.056857	3.53672	0.000405132	0.001927
PA14_20050	471.271	-0.0381906	0.0993904	-0.384248	0.700795	0.858658
PA14_20060	1459.42	0.0314384	0.0608951	0.516272	0.605665	0.797452
PA14_20070	1074.58	-0.119548	0.0653581	-1.82913	0.0673807	0.184752
PA14_20080	262.676	0.309111	0.115465	2.67709	0.00742642	0.0283111
PA14_20100	853.397	-0.0149796	0.0752033	-0.199187	0.842116	0.926689
PA14_20110	603.483	0.133766	0.0734326	1.82162	0.0685131	0.187405
PA14_20120	600.209	0.0255945	0.0710713	0.360124	0.718755	0.866545
PA14_20130	448.147	0.255205	0.0965395	2.64353	0.00820462	0.0310074
PA14_20140	135.568	-4.57365	0.26228	-17.438	4.24581e-68	1.29748e-66
PA14_20150	618.175	-0.072216	0.0759772	-0.950496	0.341861	0.576085
PA14_20170	456.174	-0.0643297	0.084141	-0.764546	0.444542	0.676151
PA14_20180	981.419	0.282096	0.0698913	4.03621	5.43221e-05	0.000295754
PA14_20190	2939.78	0.294015	0.0485627	6.05434	1.40994e-09	1.15477e-08
PA14_20200	835.901	-0.0497784	0.120211	-0.414093	0.678806	0.846134
PA14_20230	515.295	0.0237859	0.0871725	0.27286	0.784961	0.897911
PA14_20250	793.277	0.105305	0.0770411	1.36686	0.171668	0.372002
PA14_20260	3149.58	-0.0606443	0.0572003	-1.06021	0.28905	0.524238
PA14_20270	2065.6	0.0807232	0.0560416	1.44042	0.149749	0.337502
PA14_20280	360.6	-0.00773535	0.111446	-0.0694092	0.944664	0.976472
PA14_20290	2282.47	-0.0552465	0.0825682	-0.669101	0.503431	0.72923
PA14_20300	2144.77	-0.0420009	0.0584893	-0.718096	0.472698	0.703171
PA14_20320	1150.06	-0.397502	0.0671172	-5.92251	3.17069e-09	2.52059e-08
PA14_20330	110.495	0.0103826	0.198749	0.0522397	0.958338	0.982678
PA14_20350	1693.41	-0.133202	0.0928642	-1.43437	0.151466	0.339619
PA14_20360	358.911	-0.144158	0.135577	-1.06329	0.28765	0.522532
PA14_20380	1516.1	-0.0262745	0.0549627	-0.478042	0.632621	0.815801
PA14_20390	2054.88	0.567307	0.0642586	8.82851	1.06079e-18	1.28836e-17
PA14_20400	1459.89	0.0111065	0.0591707	0.187704	0.851109	0.930686
PA14_20420	586.656	0.137649	0.0858484	1.6034	0.108847	0.266445
PA14_20430	4482.95	0.0860405	0.0809743	1.06257	0.287979	0.522795
PA14_20440	1924.96	-0.00641569	0.0634904	-0.10105	0.919511	0.964655
PA14_20450	783.665	0.0400128	0.101748	0.393254	0.694132	0.856242
PA14_20460	782.02	0.0565215	0.0698457	0.809233	0.418381	0.648862
PA14_20470	234.859	0.0146301	0.137488	0.10641	0.915257	0.962376
PA14_20480	132.74	0.0749547	0.144693	0.518027	0.60444	0.796611
PA14_20491	299.048	-0.277991	0.101617	-2.73566	0.00622547	0.0242035
PA14_20500	1024.92	-1.30375	0.0776543	-16.7892	2.92722e-63	8.44584e-62
PA14_20510	1582.52	0.315146	0.0500627	6.29503	3.07336e-10	2.64281e-09
PA14_20520	5130.1	0.0379093	0.0406176	0.933323	0.350653	0.584834
PA14_20530	1288.37	0.0591917	0.0550831	1.07459	0.282559	0.515775
PA14_20550	988.877	-0.0015304	0.0582973	-0.0262516	0.979057	0.992408
PA14_20560	2711.72	0.0821732	0.0540928	1.51912	0.128733	0.301564
PA14_20570	1580.14	0.0997134	0.0585197	1.70393	0.0883942	0.22907
PA14_20580	5.96497	-0.19648	0.805531	-0.243913	0.807298	0.911567
PA14_20590	1.30502	-2.86162	1.74366	-1.64116	0.100764	0.251866
PA14_20600	809.518	-0.0328491	0.0668703	-0.491236	0.623259	0.809924
PA14_20610	58.96	-0.504361	0.224301	-2.24859	0.0245388	0.0809511
PA14_20620	2369.63	0.0679343	0.0557651	1.21822	0.223139	0.442232
PA14_20630	42.7661	-0.234252	0.289644	-0.808758	0.418654	0.649108
PA14_20640	310.182	0.293295	0.114178	2.56874	0.0102069	0.0376972
PA14_20650	62.344	-0.183585	0.209305	-0.877113	0.380425	0.614475
PA14_20670	1048.6	-0.00957472	0.070369	-0.136064	0.89177	0.951069
PA14_20680	544.33	-0.0921578	0.0863683	-1.06703	0.285957	0.519956
PA14_20690	476.063	-0.0248475	0.0794825	-0.312615	0.754573	0.883931
PA14_20700	259.351	0.0225023	0.117325	0.191794	0.847903	0.929481
PA14_20720	174.222	-1.89102	0.165228	-11.4449	2.49269e-30	4.33287e-29
PA14_20730	861.689	-0.116789	0.0680218	-1.71693	0.0859916	0.224828
PA14_20740	66.2997	0.349985	0.257414	1.35962	0.17395	0.375171
PA14_20750	1.46807	0.483221	1.58252	0.305349	0.7601	0.88594
PA14_20760	2515.48	0.169849	0.047337	3.58808	0.000333119	0.00161419
PA14_20770	718.228	-0.0146868	0.0781611	-0.187905	0.850951	0.930686
PA14_20780	1160.92	-0.0298449	0.0646081	-0.461937	0.644126	0.82293
PA14_20800	2081.84	0.0744393	0.0593813	1.25358	0.209994	0.425836
PA14_20810	706.233	-0.325522	0.087407	-3.72421	0.000195924	0.000989018
PA14_20820	11.693	-0.260871	0.477666	-0.546137	0.584972	0.781796
PA14_20840	308.142	-0.316447	0.0963853	-3.28314	0.00102656	0.00466799
PA14_20850	3393.67	0.16513	0.0462087	3.57357	0.000352147	0.0016934
PA14_20860	345.563	-0.0528947	0.0996119	-0.531008	0.595413	0.789993
PA14_20870	1979.87	0.11574	0.0530803	2.18046	0.0292231	0.0938971
PA14_20880	9910.18	0.0534517	0.036456	1.4662	0.142594	0.326291
PA14_20890	2046.08	0.0452077	0.0676846	0.667916	0.504187	0.729739
PA14_20900	147.59	0.274707	0.143822	1.91004	0.056128	0.160721
PA14_20920	279.081	-0.156969	0.120784	-1.29959	0.193742	0.403529
PA14_20940	748.966	-0.0383372	0.065978	-0.58106	0.5612	0.769296
PA14_20950	2552.22	0.0179053	0.0471315	0.379901	0.704019	0.860754
PA14_20960	1029.11	-0.115583	0.0678215	-1.70423	0.0883386	0.229068
PA14_20970	2851.61	0.0245385	0.0624354	0.393022	0.694303	0.856242
PA14_20980	2183.49	-0.0330624	0.0520065	-0.635735	0.524949	0.744319
PA14_21000	156.103	-0.00775004	0.136367	-0.0568322	0.954679	0.98094
PA14_21010	4932.3	0.0390115	0.0402949	0.96815	0.332969	0.568282
PA14_21020	1088.4	0.560024	0.0967257	5.78981	7.04666e-09	5.44942e-08
PA14_21030	2768.5	0.00652816	0.0483809	0.134933	0.892665	0.951417
PA14_21040	3247.61	-0.04181	0.0529035	-0.790307	0.429349	0.660644
PA14_21050	1223.19	0.0847351	0.067138	1.2621	0.206912	0.420782
PA14_21060	575.889	-0.0282444	0.0970953	-0.290894	0.771132	0.892147
PA14_21070	293.596	-0.0356263	0.121028	-0.294364	0.76848	0.890528
PA14_21080	128.225	0.0355199	0.17241	0.206019	0.836776	0.924314
PA14_21090	301.53	0.234461	0.107175	2.18765	0.028695	0.0924094
PA14_21110	976.293	0.256742	0.0652037	3.93754	8.23219e-05	0.000438125
PA14_21120	138.064	0.499571	0.183187	2.72711	0.0063891	0.0247719
PA14_21130	651.248	0.100557	0.0916419	1.09728	0.272518	0.502356
PA14_21140	71.765	-0.209147	0.214444	-0.975298	0.329412	0.56431
PA14_21150	2490.76	-0.0380746	0.0518976	-0.733648	0.463163	0.694073
PA14_21160	2695.13	0.0496961	0.0499025	0.995862	0.319317	0.555315
PA14_21175	1222.88	0.216404	0.0667903	3.24005	0.0011951	0.00540409
PA14_21180	1849.08	-0.0798773	0.0948718	-0.84195	0.399816	0.633555
PA14_21190	431.256	0.236764	0.1099	2.15435	0.0312129	0.0991695
PA14_21210	392.505	0.0329531	0.0968502	0.340248	0.733669	0.874985
PA14_21220	422.683	-0.365118	0.114481	-3.18933	0.00142601	0.00633735
PA14_21230	1572.37	0.011231	0.0536367	0.20939	0.834144	0.922856
PA14_21240	26.3665	0.348933	0.317194	1.10006	0.271307	0.500684
PA14_21250	1360.2	0.00985988	0.058748	0.167833	0.866714	0.940385
PA14_21260	1058.08	-0.0684196	0.0680962	-1.00475	0.315018	0.553497
PA14_21280	644.692	0.061652	0.100899	0.611027	0.541182	0.755627
PA14_21290	1017.96	0.0676529	0.0692157	0.977421	0.328361	0.563729
PA14_21300	956.595	-0.0154977	0.0765622	-0.20242	0.839589	0.925789
PA14_21310	595.706	-0.339919	0.13501	-2.51772	0.0118116	0.0428171
PA14_21320	654.6	-0.114883	0.0768247	-1.49539	0.134813	0.31213
PA14_21340	1643.52	-0.071924	0.051738	-1.39016	0.164481	0.360552
PA14_21370	1029.04	-0.208974	0.0951538	-2.19618	0.0280794	0.0908385
PA14_21380	742.501	-0.0501198	0.0890497	-0.56283	0.573551	0.775098
PA14_21400	1487.37	-0.0687797	0.0651233	-1.05615	0.290902	0.525751
PA14_21410	289.096	-0.162713	0.122397	-1.32938	0.183721	0.38812
PA14_21440	392.64	-0.0312544	0.101936	-0.306607	0.759142	0.885645
PA14_21450	644.108	-0.121281	0.072984	-1.66175	0.0965624	0.244128
PA14_21460	2122.63	0.688062	0.0555432	12.3879	3.04033e-35	5.77968e-34
PA14_21470	7.69061	-0.163399	0.612144	-0.266928	0.789524	0.899546
PA14_21480	718.256	-0.0302642	0.0886503	-0.341388	0.732811	0.874562
PA14_21490	205.758	-0.00440834	0.14009	-0.0314679	0.974896	0.989343
PA14_21510	514.995	-0.145159	0.084188	-1.72423	0.0846663	0.222227
PA14_21520	563.271	0.300477	0.0846801	3.54838	0.000387611	0.00184831
PA14_21530	4789.81	0.159029	0.0821537	1.93574	0.052899	0.153017
PA14_21540	267.195	0.682713	0.123904	5.51002	3.58793e-08	2.61795e-07
PA14_21550	646.319	0.0115548	0.0699136	0.165272	0.86873	0.9418
PA14_21560	281.062	-0.0925456	0.0984378	-0.940142	0.347145	0.580616
PA14_21570	710.171	-0.0433252	0.0747379	-0.579695	0.56212	0.769847
PA14_21580	294.168	0.100701	0.139351	0.722644	0.469898	0.700524
PA14_21590	2672.37	0.0167493	0.0486974	0.343947	0.730887	0.873662
PA14_21600	502.891	-3.26772	0.109393	-29.8714	4.63619e-196	5.06772e-194
PA14_21610	3481.67	0.0426665	0.0422315	1.0103	0.312351	0.551368
PA14_21620	1011.42	0.00858968	0.0600602	0.143018	0.886276	0.949772
PA14_21630	1471.67	0.230508	0.210052	1.09739	0.272472	0.502356
PA14_21640	2912.37	0.095303	0.0687296	1.38664	0.165552	0.362413
PA14_21650	1765.39	0.0707871	0.0527686	1.34146	0.17977	0.382845
PA14_21660	408.796	0.0741164	0.0894759	0.828339	0.407479	0.640358
PA14_21670	1007.23	-0.06723	0.0720181	-0.933515	0.350554	0.584834
PA14_21680	1302.02	-0.100394	0.0659914	-1.52132	0.128179	0.300442
PA14_21690	1715.49	0.15427	0.053382	2.88992	0.00385339	0.01578
PA14_21700	487.446	-0.244102	0.0837601	-2.91429	0.00356493	0.0146728
PA14_21710	2851.1	0.0850007	0.049916	1.70287	0.088592	0.229306
PA14_21720	2306.92	0.0764158	0.0584507	1.30735	0.191092	0.399474
PA14_21730	1306.55	0.0508384	0.0609806	0.833682	0.40446	0.637889
PA14_21750	747.886	-0.0637893	0.0741482	-0.860295	0.389627	0.624545
PA14_21760	1951.08	0.107976	0.0493058	2.18993	0.0285291	0.0919897
PA14_21770	329.868	-0.129834	0.101733	-1.27623	0.201875	0.414176
PA14_21780	6.22632	-1.40577	0.778941	-1.80472	0.0711187	0.193231
PA14_21790	290.648	-0.426814	0.117664	-3.62739	0.000286303	0.00140168
PA14_21800	706.871	-2.71463	0.0844149	-32.1582	6.77755e-227	9.6309e-225
PA14_21820	561.984	0.0308676	0.084675	0.364542	0.715453	0.865473
PA14_21830	1264.35	-0.00264851	0.0687992	-0.0384963	0.969292	0.987247
PA14_21840	2271.06	0.0762085	0.0547265	1.39253	0.163761	0.359666
PA14_21850	3354.22	-0.0288516	0.0503373	-0.573166	0.566532	0.772511
PA14_21860	548.048	0.224369	0.0959175	2.33919	0.0193256	0.0660136
PA14_21870	578.286	-0.0437165	0.106434	-0.410739	0.681264	0.847331
PA14_21890	506.863	-0.0374043	0.081641	-0.458156	0.64684	0.82482
PA14_21900	889.391	0.128397	0.0653185	1.96571	0.0493326	0.144391
PA14_21910	770.364	0.143399	0.078159	1.83471	0.0665483	0.183
PA14_21920	0.116746	0.774081	3.53381	0.21905	0.826611	0.919823
PA14_21930	3008.47	0.0138145	0.0501405	0.275516	0.78292	0.89702
PA14_21940	463.307	-0.152151	0.0826259	-1.84144	0.0655571	0.181062
PA14_21960	1322.57	0.0472224	0.0791576	0.596562	0.5508	0.762538
PA14_21970	1605.09	-0.0619864	0.0670976	-0.923824	0.355578	0.589244
PA14_21980	1500.78	-0.0220528	0.0516884	-0.42665	0.669634	0.840221
PA14_21990	176.774	0.0167983	0.154381	0.10881	0.913353	0.962096
PA14_22000	167.536	-0.0455667	0.170033	-0.267988	0.788708	0.899395
PA14_22010	175.703	0.185634	0.148904	1.24667	0.21252	0.429269
PA14_22020	6.03512	-0.370661	0.767335	-0.483049	0.629061	0.813969
PA14_22040	3935.46	-0.181454	0.05521	-3.28662	0.00101397	0.00461443
PA14_22050	416.266	0.98054	0.103092	9.51133	1.8824e-21	2.50575e-20
PA14_22060	141.69	-2.10968	0.163512	-12.9023	4.3704e-38	8.59563e-37
PA14_22075	835.603	-0.220151	0.0683201	-3.22235	0.00127143	0.00572649
PA14_22080	4.06205	-1.44602	0.95281	-1.51764	0.129105	0.302113
PA14_22090	1249.01	-0.0153082	0.3674	-0.0416663	0.966765	0.986251
PA14_22100	1959.34	-0.0663659	0.0671859	-0.987796	0.323253	0.559599
PA14_22110	1498.38	-0.157658	0.0680218	-2.31775	0.0204629	0.0693155
PA14_22120	391.813	0.00849748	0.104174	0.0815704	0.934988	0.971923
PA14_22140	1749.58	0.0682497	0.0622166	1.09697	0.272655	0.502356
PA14_22160	1464.38	0.0383857	0.0882257	0.435085	0.663501	0.835846
PA14_22180	1009.96	-0.199589	0.191475	-1.04238	0.297236	0.532626
PA14_22190	2603.23	-0.0213754	0.0456451	-0.468295	0.639574	0.819878
PA14_22210	436.729	0.00703176	0.338134	0.0207958	0.983409	0.992726
PA14_22220	448.367	-0.0926516	0.0857612	-1.08034	0.279989	0.512546
PA14_22230	151.599	-0.0839663	0.146967	-0.571326	0.567778	0.772601
PA14_22240	559.782	0.0684209	0.281673	0.242909	0.808076	0.912014
PA14_22250	641.938	-0.094491	0.0731299	-1.2921	0.196323	0.40667
PA14_22260	1149.5	0.0759973	0.0954872	0.79589	0.426096	0.657419
PA14_22270	649.265	-0.0809178	0.0819346	-0.98759	0.323354	0.559599
PA14_22280	1347.98	-0.0180088	0.0626091	-0.287638	0.773624	0.893574
PA14_22290	3249.43	-0.105796	0.0441388	-2.3969	0.0165342	0.0575509
PA14_22310	1284.23	-0.046473	0.0795077	-0.584509	0.558878	0.768504
PA14_22320	689.076	-2.27221	0.0971732	-23.3831	6.34916e-121	3.47006e-119
PA14_22330	3652.88	0.0238484	0.0431134	0.553154	0.580158	0.779684
PA14_22340	462.687	-0.00512127	0.0983554	-0.052069	0.958474	0.982678
PA14_22350	510.301	0.149814	0.103538	1.44695	0.14791	0.335349
PA14_22370	68.2721	-0.248435	0.209433	-1.18622	0.235534	0.458056
PA14_22380	1075.85	0.225948	0.0574023	3.93621	8.27778e-05	0.00044014
PA14_22400	285.156	0.598809	0.104212	5.74609	9.13308e-09	6.96187e-08
PA14_22410	656.114	-0.0499539	0.128282	-0.389407	0.696975	0.857613
PA14_22420	835.52	0.100004	0.0691422	1.44635	0.148078	0.335506
PA14_22440	185.243	0.0251591	0.169724	0.148235	0.882157	0.947587
PA14_22450	613.129	-0.047156	0.0762522	-0.618421	0.536298	0.751743
PA14_22460	644.786	0.108495	0.0914252	1.18671	0.235344	0.458056
PA14_22470	5324.43	0.0314418	0.0836643	0.375809	0.707059	0.861749
PA14_22480	1037.96	0.100626	0.066102	1.52228	0.12794	0.300252
PA14_22490	814.639	-0.182892	0.0781121	-2.34141	0.0192111	0.0657014
PA14_22500	1517.06	-0.0703875	0.0552002	-1.27513	0.202263	0.414712
PA14_22510	570.944	-0.00059706	0.0821441	-0.00726844	0.994201	0.997519
PA14_22520	729.336	0.332937	0.0904729	3.67996	0.000233271	0.00116308
PA14_22530	1180.22	0.183016	0.0590564	3.099	0.00194176	0.00841232
PA14_22540	91.1283	-0.0492139	0.176765	-0.278415	0.780694	0.896547
PA14_22550	102.027	-1.05784	0.177721	-5.95227	2.64446e-09	2.10815e-08
PA14_22560	35.8496	-0.0124347	0.265266	-0.0468763	0.962612	0.984611
PA14_22570	790.227	-0.0632798	0.0695397	-0.909982	0.362832	0.596914
PA14_22580	2222.83	0.139864	0.189132	0.739506	0.4596	0.690372
PA14_22590	199.781	0.0226152	0.146555	0.154312	0.877364	0.946647
PA14_22600	1076.12	0.0207787	0.0705266	0.294622	0.768282	0.890528
PA14_22620	182.551	0.34799	0.156023	2.23038	0.0257226	0.0842692
PA14_22630	1015.64	0.0859201	0.0698512	1.23004	0.21868	0.436133
PA14_22640	1502.72	0.126719	0.0589319	2.15026	0.0315347	0.0998569
PA14_22650	1.06881	2.62762	1.83652	1.43076	0.152499	0.34144
PA14_22660	2005.92	0.0311279	0.0535993	0.580752	0.561408	0.769296
PA14_22670	10604	0.0572697	0.0410165	1.39626	0.162636	0.357748
PA14_22680	137.053	-0.119964	0.153859	-0.779705	0.435565	0.667318
PA14_22690	2259.1	-0.576338	0.0556874	-10.3495	4.20609e-25	6.34149e-24
PA14_22700	269.62	0.0466926	0.110486	0.422612	0.672578	0.841901
PA14_22710	1062.63	-0.0455701	0.0632535	-0.720436	0.471256	0.701945
PA14_22720	621.443	0.108328	0.0831997	1.30202	0.192908	0.40194
PA14_22730	608.873	-0.0374745	0.0773757	-0.484319	0.62816	0.813686
PA14_22740	62.2383	0.213685	0.21853	0.977831	0.328158	0.563716
PA14_22760	425.006	-0.104887	0.113329	-0.925509	0.354701	0.588319
PA14_22770	611.337	-0.211463	0.123914	-1.70653	0.0879089	0.228674
PA14_22780	2496.98	-0.0810019	0.0515888	-1.57015	0.116381	0.28042
PA14_22800	957.582	-0.327491	0.0806514	-4.06058	4.89519e-05	0.000267798
PA14_22820	1340.16	0.143969	0.0689229	2.08884	0.0367219	0.113239
PA14_22830	2824.85	-0.0164135	0.0734614	-0.22343	0.823201	0.919367
PA14_22840	736.155	0.0941572	0.0781927	1.20417	0.228524	0.449747
PA14_22860	3116.8	0.0957116	0.0618633	1.54715	0.121828	0.289615
PA14_22870	165.941	0.00776684	0.147455	0.0526727	0.957993	0.982539
PA14_22880	2307.27	0.145308	0.0624742	2.32589	0.0200245	0.0682778
PA14_22890	803.758	0.00409683	0.0815207	0.0502552	0.959919	0.983079
PA14_22910	286.248	-0.262253	0.128221	-2.04532	0.0408237	0.123628
PA14_22930	668.249	0.257388	0.0781711	3.29262	0.000992574	0.00452066
PA14_22940	2155.88	-0.178109	0.0490677	-3.62986	0.000283574	0.00139071
PA14_22960	7712.86	0.0774176	0.0386736	2.00182	0.0453043	0.135105
PA14_22980	1093.15	-0.0215539	0.075048	-0.287202	0.773958	0.893649
PA14_22990	789.97	0.225896	0.0817811	2.7622	0.00574128	0.0224285
PA14_23000	520.138	0.360111	0.101128	3.56094	0.000369535	0.00177252
PA14_23010	466.434	0.0237397	0.0889502	0.266888	0.789555	0.899546
PA14_23030	24.0517	-6.56028	1.02329	-6.41098	1.44592e-10	1.2683e-09
PA14_23050	354.635	-0.113542	0.108106	-1.05029	0.293585	0.528584
PA14_23060	598.92	-0.0289997	0.075792	-0.382622	0.702	0.858947
PA14_23070	1923.12	-0.0169928	0.0519792	-0.326915	0.743732	0.878685
PA14_23080	1616.34	-0.0339517	0.0583641	-0.581722	0.560754	0.769168
PA14_23090	2109.57	0.00157614	0.070451	0.0223722	0.982151	0.992726
PA14_23100	558.597	-0.00257671	0.121906	-0.0211368	0.983137	0.992726
PA14_23110	2538.42	-0.266188	0.0487399	-5.46139	4.72421e-08	3.43821e-07
PA14_23120	284.027	-0.0902395	0.105408	-0.856099	0.391943	0.627197
PA14_23130	1111.81	0.138375	0.0943173	1.46712	0.142344	0.325981
PA14_23160	782.809	-0.0259156	0.0798937	-0.324376	0.745654	0.879914
PA14_23170	633.342	0.0152321	0.0772494	0.197181	0.843686	0.927565
PA14_23190	2334.61	0.0929395	0.0463699	2.00431	0.0450371	0.13452
PA14_23200	102.005	-0.771653	0.208854	-3.6947	0.000220148	0.00110152
PA14_23210	2082.14	-1.1581	0.054289	-21.3321	5.72088e-101	2.54043e-99
PA14_23220	1095.92	-3.28965	0.10109	-32.5417	2.74507e-232	4.33416e-230
PA14_23240	1004.86	-0.266783	0.0736339	-3.62311	0.000291083	0.00142263
PA14_23250	5043.52	-0.0925351	0.0444065	-2.08382	0.0371767	0.114346
PA14_23260	39.2009	-6.2757	0.755157	-8.31046	9.53338e-17	1.09692e-15
PA14_23270	398.942	0.606603	0.108036	5.61484	1.96743e-08	1.46757e-07
PA14_23280	160.757	-2.70894	0.182389	-14.8525	6.69926e-50	1.63427e-48
PA14_23290	203.697	-2.44391	0.165349	-14.7803	1.96266e-49	4.70708e-48
PA14_23310	668.05	0.251433	0.364713	0.6894	0.490571	0.718107
PA14_23320	4.60776	-2.73017	0.913359	-2.98915	0.00279753	0.0116834
PA14_23330	948.986	-0.806595	0.0719653	-11.2081	3.72083e-29	6.37023e-28
PA14_23340	2990.65	0.372026	0.0588341	6.3233	2.56031e-10	2.21168e-09
PA14_23360	1958.12	0.130344	0.0568777	2.29166	0.0219252	0.0736976
PA14_23370	94.8138	0.135973	0.183288	0.741854	0.458176	0.689508
PA14_23380	1005.83	0.353253	0.0572936	6.16566	7.01892e-10	5.86699e-09
PA14_23390	393.709	0.0999857	0.0991447	1.00848	0.313223	0.551536
PA14_23400	904.366	0.117291	0.0670478	1.74937	0.0802268	0.213088
PA14_23410	2249.09	0.193922	0.0571794	3.39147	0.000695183	0.00323092
PA14_23420	904.511	1.12074	0.0654829	17.115	1.14755e-65	3.37962e-64
PA14_23430	6911.17	0.295584	0.076062	3.88609	0.000101873	0.000535165
PA14_23440	1767.54	0.281153	0.152527	1.8433	0.0652847	0.180837
PA14_23450	2126.47	0.271541	0.0547313	4.96135	7.00042e-07	4.6593e-06
PA14_23460	830.752	0.150476	0.0687685	2.18816	0.028658	0.0923425
PA14_23470	5202.75	0.245159	0.0441088	5.55805	2.72813e-08	2.01124e-07
PA14_23480	214.911	0.0431632	0.159795	0.270116	0.787071	0.899066
PA14_23500	1700.25	0.0714671	0.0741517	0.963795	0.335149	0.569721
PA14_23510	1073.86	0.0725357	0.0841459	0.862023	0.388675	0.623521
PA14_23520	895.726	0.153168	0.0668535	2.2911	0.0219576	0.073763
PA14_23530	20.2391	0.650522	0.404573	1.60792	0.107852	0.265038
PA14_23540	847.146	-0.0347621	0.0708924	-0.49035	0.623886	0.810037
PA14_23560	440.608	-0.713526	0.121173	-5.8885	3.89719e-09	3.07235e-08
PA14_23580	263.172	-2.77698	0.163589	-16.9753	1.25086e-64	3.64609e-63
PA14_23590	1143.28	0.0629612	0.059878	1.05149	0.293033	0.528258
PA14_23610	457.111	-0.161524	0.0852683	-1.8943	0.0581846	0.165361
PA14_23620	2567.75	0.0369764	0.0467442	0.791037	0.428922	0.660345
PA14_23630	270.684	0.0707563	0.11698	0.604857	0.545274	0.758155
PA14_23640	1735.51	0.0965948	0.0589999	1.6372	0.101588	0.253257
PA14_23650	2098.59	-0.042801	0.0564259	-0.758534	0.448132	0.679925
PA14_23670	465.803	-0.0131714	0.0876465	-0.150279	0.880545	0.947023
PA14_23680	502.493	0.0652381	0.091688	0.711523	0.47676	0.707797
PA14_23690	2547.67	-0.0767535	0.0740546	-1.03644	0.299995	0.536385
PA14_23700	377.804	0.042574	0.0977076	0.435729	0.663034	0.835814
PA14_23720	848.855	-0.415133	0.0686679	-6.04552	1.48933e-09	1.21454e-08
PA14_23730	5273.71	0.0920825	0.0540072	1.705	0.0881935	0.228997
PA14_23750	466.099	-0.713021	0.086064	-8.28478	1.18329e-16	1.35875e-15
PA14_23760	139.423	0.226945	0.215173	1.05471	0.291558	0.526385
PA14_23770	3952.16	0.0127902	0.0602342	0.21234	0.831842	0.922213
PA14_23790	3154.05	0.0354199	0.0528186	0.670596	0.502478	0.728269
PA14_23800	361.462	-0.120445	0.120198	-1.00206	0.316316	0.553844
PA14_23810	996.563	0.00326634	0.086581	0.0377259	0.969906	0.987247
PA14_23830	3280.62	0.39056	0.0463364	8.4288	3.49217e-17	4.09268e-16
PA14_23840	1023.82	0.0358822	0.0746611	0.480601	0.6308	0.814694
PA14_23850	1207.54	-0.0100917	0.0662232	-0.152389	0.87888	0.947023
PA14_23860	37.6414	-0.246368	0.273132	-0.902013	0.36705	0.601243
PA14_23880	191.766	-0.0769983	0.150863	-0.510384	0.609783	0.801388
PA14_23890	4554.71	0.118842	0.0533362	2.22816	0.02587	0.0846547
PA14_23900	3355.3	0.108691	0.0396572	2.74077	0.00612962	0.0238635
PA14_23920	4616.45	0.0283566	0.0512697	0.553087	0.580204	0.779684
PA14_23930	436.061	0.297281	0.123526	2.40663	0.0161005	0.0562132
PA14_23950	8201.52	0.127178	0.0350075	3.63288	0.000280277	0.00137573
PA14_23970	1041.25	-0.0425004	0.0668119	-0.636121	0.524698	0.744319
PA14_23980	1434.5	0.101032	0.0755768	1.33682	0.181283	0.384626
PA14_23990	21.3712	0.187568	0.412443	0.454772	0.649273	0.826628
PA14_24010	767.475	-0.0501852	0.0702006	-0.714883	0.474681	0.705383
PA14_24020	38.5194	-0.268115	0.292428	-0.916859	0.359216	0.593725
PA14_24040	643.931	0.493424	0.0807351	6.11164	9.86096e-10	8.17051e-09
PA14_24050	793.393	-0.16759	0.0663402	-2.52622	0.0115296	0.0420091
PA14_24060	679.229	-0.523553	0.0846341	-6.18607	6.16821e-10	5.19409e-09
PA14_24070	1125.48	-0.0678813	0.0829004	-0.818829	0.412884	0.644734
PA14_24080	1999.98	0.263854	0.07164	3.68305	0.000230457	0.00115006
PA14_24100	3467.73	0.0195338	0.0576918	0.338589	0.734919	0.87574
PA14_24140	1989.82	0.16875	0.0572495	2.94761	0.00320237	0.0132477
PA14_24150	1104.78	0.75016	0.0967002	7.75759	8.65567e-15	9.26531e-14
PA14_24170	35.3704	-4.642	0.518412	-8.95426	3.42022e-19	4.25394e-18
PA14_24180	556.962	-0.103545	0.0793838	-1.30436	0.192111	0.401161
PA14_24190	97.3179	0.181903	0.208744	0.871419	0.383525	0.617882
PA14_24210	4033.82	-0.0126034	0.0478142	-0.263591	0.792095	0.901174
PA14_24220	2.07633	-3.66594	1.40931	-2.60123	0.00928905	0.0347133
PA14_24230	4528.15	0.699156	0.0595382	11.743	7.67359e-32	1.38027e-30
PA14_24240	1070.64	-0.0471741	0.072265	-0.652793	0.51389	0.736869
PA14_24245	1021.62	0.0940893	0.0696586	1.35072	0.176785	0.379187
PA14_24260	1221.25	0.0265569	0.0641962	0.413683	0.679106	0.846134
PA14_24270	2011.14	-0.0134242	0.0603047	-0.222606	0.823842	0.919446
PA14_24290	1674.37	0.107844	0.0506818	2.12787	0.0333479	0.104666
PA14_24300	1616.19	-0.0300387	0.0631547	-0.475638	0.634333	0.816104
PA14_24310	2093.85	1.05335	0.0573154	18.3782	1.96319e-75	6.45017e-74
PA14_24330	2082.06	0.0223924	0.0571741	0.391654	0.695314	0.856901
PA14_24340	224.561	0.242642	0.130336	1.86166	0.0626504	0.175076
PA14_24350	493.463	-0.0110717	0.0783723	-0.141271	0.887656	0.950708
PA14_24360	1700.07	-0.00999332	0.062873	-0.158945	0.873713	0.944141
PA14_24370	1498.05	0.278057	0.0617107	4.50582	6.61186e-06	3.97271e-05
PA14_24380	2365	0.218363	0.0503172	4.33972	1.42667e-05	8.3086e-05
PA14_24410	1918.82	0.0239823	0.0477426	0.502326	0.615438	0.805098
PA14_24420	617.225	-0.0882151	0.0783515	-1.12589	0.260213	0.487454
PA14_24430	3759.52	0.0414238	0.0419495	0.987467	0.323414	0.559599
PA14_24440	1120.04	0.0687795	0.070172	0.980155	0.327009	0.563078
PA14_24445	1284.92	-0.183433	0.065475	-2.80158	0.00508535	0.0201852
PA14_24480	2691.71	0.145183	0.0682928	2.1259	0.0335117	0.104948
PA14_24490	1205.94	-0.00505792	0.0764831	-0.0661312	0.947273	0.977839
PA14_24500	189.884	-0.163156	0.169988	-0.959809	0.337151	0.571453
PA14_24510	1632.62	-0.0584097	0.0663472	-0.880365	0.378662	0.612558
PA14_24530	2500.62	0.609717	0.0570022	10.6964	1.05836e-26	1.66641e-25
PA14_24550	652.831	0.0603089	0.0867295	0.695368	0.486825	0.715941
PA14_24560	1187.07	0.0336029	0.0641656	0.52369	0.600494	0.794324
PA14_24570	813.848	-0.0119428	0.0828267	-0.144191	0.88535	0.949339
PA14_24580	1812.97	0.4954	0.286731	1.72775	0.0840328	0.221098
PA14_24590	1893.33	0.353257	0.0549961	6.42331	1.33346e-10	1.17328e-09
PA14_24600	173.449	-1.2227	0.15414	-7.93241	2.14938e-15	2.37686e-14
PA14_24610	205.202	-0.114297	0.121962	-0.937157	0.348678	0.582565
PA14_24620	1528	-0.0554584	0.0549719	-1.00885	0.313047	0.551397
PA14_24630	1866.14	0.157148	0.0501821	3.13154	0.0017389	0.00760885
PA14_24640	355.128	-0.811879	0.108989	-7.4492	9.39076e-14	9.68731e-13
PA14_24650	630.167	0.0306509	0.0840587	0.364636	0.715383	0.865473
PA14_24665	400.438	-0.0202392	0.114474	-0.176802	0.859664	0.935153
PA14_24675	1205.06	0.2701	0.069766	3.87152	0.000108158	0.000565048
PA14_24690	1031.12	-0.0672508	0.0640047	-1.05072	0.293389	0.528405
PA14_24700	479.154	-3.89666	0.120545	-32.3254	3.07563e-229	4.48254e-227
PA14_24710	2607.33	0.110661	0.0530227	2.08705	0.0368839	0.11363
PA14_24720	1979.48	0.517517	0.059239	8.73609	2.41316e-18	2.91839e-17
PA14_24730	735.374	0.530273	0.0955149	5.55173	2.82863e-08	2.08263e-07
PA14_24740	258.441	-0.0101036	0.117331	-0.0861124	0.931377	0.970542
PA14_24760	6.89812	-0.380737	0.652599	-0.583417	0.559613	0.768504
PA14_24770	1645.05	0.0220858	0.0582863	0.378919	0.704748	0.861459
PA14_24780	753.307	0.077249	0.0864429	0.893642	0.371513	0.605587
PA14_24790	12.6754	-0.259938	0.592237	-0.438909	0.660728	0.835315
PA14_24810	83.7692	-0.137923	0.196241	-0.702824	0.482165	0.712592
PA14_24820	655.694	0.23456	0.0801299	2.92725	0.00341978	0.0141265
PA14_24840	1229.61	-0.00978925	0.0596506	-0.16411	0.869645	0.941894
PA14_24850	1138.18	-0.074853	0.0770665	-0.971278	0.33141	0.566707
PA14_24860	51.9822	-0.105706	0.234393	-0.450978	0.652005	0.828319
PA14_24880	674.639	0.438747	0.0773976	5.66873	1.43856e-08	1.08015e-07
PA14_24890	151.078	0.19762	0.154737	1.27713	0.201556	0.413889
PA14_24900	469.637	0.0138223	0.0888168	0.155627	0.876327	0.946067
PA14_24920	2118.72	0.0153676	0.0470009	0.326964	0.743695	0.878685
PA14_24940	734.178	-0.0156705	0.0747481	-0.209644	0.833945	0.922856
PA14_24950	441.533	0.025906	0.0814999	0.317865	0.750587	0.881475
PA14_24960	1227.93	-0.00847975	0.0643011	-0.131876	0.895083	0.952387
PA14_24970	2011.42	-0.0835042	0.0548655	-1.52198	0.128014	0.300302
PA14_24980	2158.4	0.101297	0.0565418	1.79155	0.0732052	0.198142
PA14_24990	115.682	0.17198	0.171959	1.00012	0.317252	0.553844
PA14_25000	1464.06	0.00941014	0.0668034	0.140863	0.887978	0.950708
PA14_25020	1884.83	-0.0283731	0.0483633	-0.586666	0.557428	0.767252
PA14_25030	128.152	0.076204	0.151434	0.503214	0.614814	0.805098
PA14_25040	2557.95	0.159432	0.0429132	3.71521	0.000203032	0.00102308
PA14_25050	1160	-0.989182	0.0652321	-15.164	6.11995e-52	1.53241e-50
PA14_25060	1079.48	0.111935	0.0607423	1.84279	0.0653591	0.180845
PA14_25080	10927.6	-0.246507	0.0380172	-6.4841	8.92609e-11	7.91511e-10
PA14_25090	3034.88	-0.0477902	0.0532199	-0.897977	0.369198	0.603717
PA14_25100	1063.39	-0.0718782	0.0581	-1.23715	0.216032	0.433285
PA14_25110	440.961	-0.202228	0.0820114	-2.46586	0.0136686	0.0488323
PA14_25140	33015.6	-0.0922402	0.0351671	-2.62292	0.00871808	0.0327952
PA14_25150	266.86	-0.0873662	0.122251	-0.714646	0.474828	0.705416
PA14_25160	28.816	-0.19998	0.373835	-0.534942	0.59269	0.78822
PA14_25180	646.443	-0.222775	0.0766977	-2.90459	0.00367739	0.0151247
PA14_25195	1192.35	-0.0076401	0.0818611	-0.09333	0.925641	0.968049
PA14_25210	368.441	0.33752	0.0975315	3.46063	0.000538917	0.00253128
PA14_25220	17.0438	-0.308823	0.440412	-0.701215	0.483169	0.713704
PA14_25230	1089.04	0.0766063	0.0800331	0.957183	0.338475	0.572491
PA14_25250	707.914	-0.632955	0.0754099	-8.39353	4.71761e-17	5.49486e-16
PA14_25270	796.494	-0.0496952	0.084108	-0.59085	0.554621	0.765905
PA14_25280	119.325	-0.340057	0.166737	-2.03948	0.0414025	0.125177
PA14_25305	618.135	0.015783	0.08104	0.194756	0.845584	0.928933
PA14_25320	573.539	-0.0598071	0.0760495	-0.786423	0.43162	0.6636
PA14_25330	553.496	-0.389209	0.0820411	-4.74407	2.09466e-06	1.32732e-05
PA14_25340	817.946	-0.086485	0.0667408	-1.29583	0.195033	0.405325
PA14_25350	105.806	-0.0253345	0.175245	-0.144566	0.885054	0.949339
PA14_25360	63.885	-0.228553	0.216386	-1.05623	0.290864	0.525751
PA14_25370	285.807	-0.195577	0.108954	-1.79503	0.0726485	0.196823
PA14_25390	559.407	-2.3757	0.107051	-22.1922	4.08563e-109	1.95149e-107
PA14_25400	511.254	-0.147228	0.0784741	-1.87613	0.0606368	0.170539
PA14_25410	98.1025	-0.0468282	0.186914	-0.250534	0.802174	0.909003
PA14_25420	237.918	-2.99597	0.145701	-20.5624	5.95557e-94	2.48908e-92
PA14_25430	114.088	-4.52104	0.273829	-16.5104	3.08643e-61	8.642e-60
PA14_25440	187.332	-0.84642	0.126319	-6.70064	2.07513e-11	1.90243e-10
PA14_25450	129.253	-5.2743	0.324753	-16.241	2.58751e-59	7.17435e-58
PA14_25470	2361.29	0.381504	0.0706071	5.4032	6.54633e-08	4.72199e-07
PA14_25480	1759.38	0.016196	0.0577034	0.280677	0.778958	0.895912
PA14_25490	73.9998	-6.39049	0.575746	-11.0995	1.26144e-28	2.13393e-27
PA14_25500	2925.55	-0.495199	0.0515662	-9.60316	7.7529e-22	1.04673e-20
PA14_25510	768.929	-1.00095	0.0816664	-12.2566	1.54907e-34	2.91553e-33
PA14_25520	1581.06	0.87363	0.060201	14.5119	1.01882e-47	2.37335e-46
PA14_25530	19.7264	-3.72906	0.554785	-6.72163	1.797e-11	1.6501e-10
PA14_25540	661.364	-2.47039	0.103678	-23.8275	1.73347e-125	9.95259e-124
PA14_25550	537.147	-1.69605	0.0926854	-18.2989	8.43599e-75	2.74001e-73
PA14_25560	35.461	-2.33898	0.332538	-7.0337	2.01123e-12	1.95416e-11
PA14_25580	3021.45	-0.156171	0.06898	-2.26401	0.0235735	0.0784035
PA14_25590	1752.79	0.0714512	0.0529838	1.34855	0.177483	0.379967
PA14_25600	3903.4	0.0182499	0.0568484	0.321028	0.74819	0.881208
PA14_25610	1988.23	-0.0535992	0.0541791	-0.989297	0.322518	0.5589
PA14_25620	0.178859	0.774081	3.53381	0.21905	0.826611	0.919823
PA14_25630	7.082	-0.84336	0.731094	-1.15356	0.248681	0.474011
PA14_25640	181.028	-0.141657	0.121675	-1.16423	0.24433	0.467758
PA14_25650	140.829	-3.17142	0.18954	-16.7321	7.64307e-63	2.1941e-61
PA14_25660	22.4211	-3.30277	0.491124	-6.72492	1.75693e-11	1.61592e-10
PA14_25670	123.261	-9.63982	1.02938	-9.36472	7.6252e-21	9.82803e-20
PA14_25690	819.009	-0.676279	0.080978	-8.35139	6.74616e-17	7.79373e-16
PA14_25710	4731.84	0.130504	0.046169	2.82665	0.00470376	0.018815
PA14_25730	347.084	-7.62515	0.396818	-19.2158	2.73233e-82	1.00197e-80
PA14_25740	494.19	-3.24955	0.109635	-29.6398	4.59575e-193	4.92873e-191
PA14_25760	516.526	-2.64932	0.228851	-11.5766	5.41458e-31	9.55791e-30
PA14_25770	1052.82	0.257088	0.0686794	3.7433	0.000181617	0.000926671
PA14_25780	1214.59	0.0112924	0.0603992	0.186962	0.851691	0.930784
PA14_25790	126.675	0.0223904	0.149975	0.149294	0.881322	0.947366
PA14_25800	3035.85	0.0319453	0.0518531	0.616074	0.537846	0.752798
PA14_25810	1164.72	0.0983532	0.227451	0.432415	0.66544	0.837546
PA14_25820	163.574	-0.337906	0.162482	-2.07966	0.037557	0.115205
PA14_25830	1598.62	-0.0132931	0.0659584	-0.201537	0.840279	0.925789
PA14_25840	272.616	-2.58546	0.127058	-20.3487	4.76285e-92	1.90648e-90
PA14_25860	1574.99	-1.9779	0.0622258	-31.7859	1.0133e-221	1.33944e-219
PA14_25880	816.751	-0.205172	0.0675248	-3.03847	0.0023778	0.0101239
PA14_25900	1809.13	-1.86035	0.0604082	-30.7963	2.93412e-208	3.62555e-206
PA14_25910	387.093	0.0388891	0.106605	0.364795	0.715265	0.865473
PA14_25920	2350.35	0.0468772	0.0529854	0.884719	0.376308	0.610253
PA14_25930	2186.49	-0.503272	0.0814699	-6.17739	6.51689e-10	5.47149e-09
[truncated: 3,685 more rows]

## Sheet: set1-G21
	baseMean	log2FoldChange	lfcSE	stat	pvalue	padj
PA14_00010	497.147	-0.398089	0.0916944	-4.34148	1.41526e-05	7.31993e-05
PA14_00020	218.261	-2.60901	0.150029	-17.39	9.8272e-68	3.44498e-66
PA14_00030	383.836	-0.054932	0.0862483	-0.636906	0.524186	0.720919
PA14_00050	2830.44	-1.70945	0.0548431	-31.1698	2.73265e-213	6.74728e-211
PA14_00060	117.1	-1.6082	0.163907	-9.81164	1.00325e-22	1.30976e-21
PA14_00070	268.278	-3.34512	0.142319	-23.5044	3.68111e-122	2.98643e-120
PA14_00080	212.015	0.107441	0.282431	0.380413	0.703639	0.84517
PA14_00090	74.3666	-9.50745	1.03093	-9.22221	2.91036e-20	3.49428e-19
PA14_00100	517.998	-10.8871	0.95387	-11.4136	3.57659e-30	5.70547e-29
PA14_00110	1527.6	0.0111138	0.0566583	0.196156	0.844488	0.921344
PA14_00130	792.078	-0.191597	0.0680786	-2.81436	0.00488748	0.0172827
PA14_00140	1122.54	0.712179	0.0606881	11.7351	8.4259e-32	1.37898e-30
PA14_00150	1361.59	0.209793	0.0607517	3.45329	0.000553792	0.00232617
PA14_00160	141.691	-0.0743482	0.147022	-0.505695	0.613071	0.785415
PA14_00170	1347.88	-0.260051	0.0566813	-4.58795	4.47612e-06	2.42556e-05
PA14_00180	905.998	-0.168358	0.0920889	-1.82821	0.0675176	0.166955
PA14_00190	554.663	0.212766	0.0994003	2.1405	0.0323147	0.091483
PA14_00200	78.7194	-8.15963	0.963462	-8.46907	2.47364e-17	2.63068e-16
PA14_00210	66.4412	-0.60526	0.20556	-2.94445	0.0032353	0.0119696
PA14_00230	425.499	0.410974	0.0946232	4.34327	1.4038e-05	7.26728e-05
PA14_00240	58.2608	-0.346036	0.215709	-1.60418	0.108675	0.243801
PA14_00250	598.364	-0.244477	0.0783374	-3.12083	0.00180345	0.00697195
PA14_00280	594.877	-4.0644	0.116805	-34.7964	2.75294e-265	8.68554e-263
PA14_00290	59.4366	-1.42118	0.220829	-6.43567	1.22926e-10	9.43374e-10
PA14_00310	1907.45	0.153709	0.0549803	2.79571	0.00517856	0.0182438
PA14_00320	802.627	0.0380359	0.0730437	0.520728	0.602556	0.780191
PA14_00340	16.7597	0.106692	0.372602	0.286342	0.774617	0.887276
PA14_00360	935.899	0.395375	0.0604073	6.54515	5.94343e-11	4.64914e-10
PA14_00380	315.826	-0.0454872	0.101774	-0.446945	0.654915	0.814377
PA14_00400	159.761	0.179305	0.12901	1.38985	0.164573	0.326672
PA14_00410	127.313	0.0727117	0.138444	0.525205	0.59944	0.778017
PA14_00420	3.78437	1.56238	0.97519	1.60213	0.109128	0.244472
PA14_00430	551.116	0.0542973	0.0874483	0.620907	0.534661	0.727965
PA14_00440	405.191	0.276073	0.100622	2.74367	0.00607562	0.0211159
PA14_00450	535.705	0.132839	0.108465	1.22472	0.220681	0.40637
PA14_00460	129.579	-0.508704	0.14593	-3.48594	0.000490405	0.00208294
PA14_00470	7380.93	0.467784	0.0743582	6.29095	3.15519e-10	2.36702e-09
PA14_00480	1101.84	0.131577	0.0698117	1.88473	0.0594656	0.150426
PA14_00490	294.424	-0.131339	0.0941848	-1.39449	0.163171	0.325025
PA14_00510	3539.86	-0.218224	0.0631064	-3.45804	0.000544117	0.00229231
PA14_00520	4160.22	0.034587	0.0455194	0.759829	0.447357	0.653095
PA14_00530	173.655	-0.141378	0.128253	-1.10233	0.270317	0.469602
PA14_00550	690.509	-0.038826	0.0766369	-0.506622	0.61242	0.785161
PA14_00560	1399.03	-0.246289	0.0775552	-3.17567	0.00149493	0.00582684
PA14_00570	1258.46	0.105181	0.0620625	1.69475	0.0901222	0.21114
PA14_00580	1568.9	0.55841	0.0704843	7.92247	2.32831e-15	2.27973e-14
PA14_00590	964.576	0.0900183	0.0620696	1.45028	0.146981	0.303418
PA14_00600	4011.58	-0.407105	0.0487646	-8.34837	6.92104e-17	7.21185e-16
PA14_00620	348.333	0.10264	0.104143	0.985568	0.324345	0.532194
PA14_00630	2643.29	0.00195625	0.0476945	0.0410164	0.967283	0.984444
PA14_00640	1576.52	0.124267	0.0608791	2.0412	0.0412305	0.111947
PA14_00650	343.956	0.164321	0.0994774	1.65184	0.0985663	0.226623
PA14_00660	473.26	-0.361637	0.0876557	-4.12566	3.69678e-05	0.000181139
PA14_00670	1394.08	0.0428884	0.0601928	0.712517	0.476145	0.679888
PA14_00680	734.065	-0.472408	0.100008	-4.72368	2.31612e-06	1.28827e-05
PA14_00690	225.366	0.101218	0.120028	0.843284	0.39907	0.608244
PA14_00700	462.749	-0.0767912	0.125243	-0.613138	0.539785	0.73153
PA14_00710	1092.03	0.230317	0.060442	3.81054	0.000138663	0.000635056
PA14_00720	335.772	0.124065	0.11987	1.035	0.300671	0.505102
PA14_00730	664.64	0.259953	0.0806962	3.22138	0.00127576	0.00503827
PA14_00740	925.768	0.235734	0.0635626	3.70869	0.000208333	0.000936015
PA14_00750	734.111	0.0104597	0.0702336	0.148927	0.881611	0.940777
PA14_00760	76.8652	-0.0891963	0.190943	-0.467135	0.640404	0.80408
PA14_00770	597.556	-0.0564411	0.0868782	-0.649658	0.515913	0.714777
PA14_00780	1088.59	0.430025	0.0596459	7.20963	5.61029e-13	4.88663e-12
PA14_00790	124.341	-0.387368	0.146159	-2.65031	0.00804179	0.0271841
PA14_00800	98.1511	-0.381929	0.208451	-1.83223	0.0669178	0.16595
PA14_00810	4641.65	0.0367307	0.0715179	0.513587	0.60754	0.782116
PA14_00820	4352.62	-0.0908283	0.0689655	-1.31701	0.187835	0.360986
PA14_00830	601.51	-0.157149	0.0757506	-2.07455	0.038028	0.104835
PA14_00850	218.799	0.227812	0.119027	1.91395	0.0556267	0.142556
PA14_00860	15.9738	-0.397599	0.47251	-0.841462	0.400089	0.609471
PA14_00875	419.12	0.0680769	0.0931701	0.730673	0.464979	0.669107
PA14_00890	1266.54	0.0010406	0.0576749	0.0180425	0.985605	0.993301
PA14_00900	1088.25	-0.00101862	0.066712	-0.015269	0.987818	0.99378
PA14_00910	574.978	-0.0567952	0.0942467	-0.602623	0.54676	0.736841
PA14_00925	600.231	-0.253493	0.116022	-2.18488	0.0288979	0.0835171
PA14_00940	3685.72	0.248624	0.0467869	5.31397	1.07265e-07	6.76088e-07
PA14_00960	1030.61	-0.032964	0.0724283	-0.455126	0.649019	0.809997
PA14_00970	61.0433	0.0659503	0.235501	0.280042	0.779445	0.889297
PA14_00980	729.683	0.0747086	0.0734015	1.01781	0.308769	0.515584
PA14_00990	445.989	0.00601944	0.0919373	0.0654734	0.947797	0.975192
PA14_01010	104.527	-0.0445102	0.155736	-0.285805	0.775027	0.887554
PA14_01020	863.677	0.0771857	0.0686851	1.12376	0.261114	0.457658
PA14_01030	2340.96	-0.235649	0.0535393	-4.40141	1.0755e-05	5.61376e-05
PA14_01040	1847.2	-0.0231054	0.0619643	-0.372883	0.709235	0.848178
PA14_01060	4.71505	-0.625197	0.778142	-0.803449	0.421715	0.629543
PA14_01070	385.388	0.00555694	0.090811	0.0611924	0.951206	0.975452
PA14_01080	1502.23	-0.0578122	0.0611199	-0.945883	0.344209	0.554699
PA14_01100	3334.07	0.0574284	0.0698314	0.822387	0.410857	0.618418
PA14_01110	478.038	-0.236817	0.0828936	-2.85688	0.00427825	0.0154066
PA14_01120	296.156	-0.169512	0.115072	-1.4731	0.140725	0.2949
PA14_01130	676.688	-0.00863802	0.0805526	-0.107234	0.914603	0.957425
PA14_01140	2943.68	0.116996	0.0488995	2.39258	0.0167302	0.0520037
PA14_01150	355.954	0.820089	0.0936538	8.75661	2.01217e-18	2.26728e-17
PA14_01160	6969.57	-0.0572076	0.0392434	-1.45777	0.144905	0.300807
PA14_01170	1225.9	0.712944	0.0606692	11.7513	6.95164e-32	1.1443e-30
PA14_01180	79.5542	-0.184419	0.182426	-1.01092	0.312052	0.51893
PA14_01190	784.513	0.525856	0.0948137	5.5462	2.91937e-08	1.90784e-07
PA14_01200	261.093	-0.250234	0.0982558	-2.54677	0.0108726	0.0354007
PA14_01220	2206.2	0.0982209	0.0607029	1.61806	0.105649	0.238467
PA14_01230	326.301	-0.222929	0.110005	-2.02654	0.0427092	0.115443
PA14_01240	769.125	-0.0573006	0.0698314	-0.820557	0.411899	0.61932
PA14_01250	265.359	-0.113358	0.101993	-1.11143	0.266384	0.464183
PA14_01270	359.74	0.0231255	0.10577	0.21864	0.826931	0.91267
PA14_01290	484.97	0.0836906	0.0829826	1.00853	0.313199	0.519701
PA14_01310	710.153	0.435097	0.0783615	5.55244	2.8171e-08	1.84403e-07
PA14_01320	410.213	0.0252482	0.0815352	0.30966	0.75682	0.878214
PA14_01330	1361.95	-0.0278102	0.0616974	-0.450752	0.652168	0.812563
PA14_01340	954.819	0.61691	0.0738844	8.34967	6.84531e-17	7.14605e-16
PA14_01350	662.164	0.237904	0.0723958	3.28616	0.00101565	0.0040791
PA14_01360	1147.26	-0.0192519	0.0658852	-0.292203	0.770131	0.886416
PA14_01380	725.895	-0.034195	0.073609	-0.46455	0.642254	0.805615
PA14_01390	670.42	-0.174961	0.0871415	-2.00778	0.0446669	0.119935
PA14_01400	472.11	-0.019692	0.0808857	-0.243454	0.807653	0.900819
PA14_01410	688.471	0.121717	0.0778526	1.56343	0.117953	0.258531
PA14_01430	2474.74	0.0735607	0.0463328	1.58766	0.112364	0.249361
PA14_01440	2117.93	-0.0711522	0.0604779	-1.1765	0.239396	0.431459
PA14_01460	565.674	0.0448752	0.0811468	0.553012	0.580255	0.76482
PA14_01470	2250.23	-0.599743	0.0539285	-11.1211	9.90692e-29	1.53301e-27
PA14_01480	381.553	0.359881	0.101733	3.53751	0.000403923	0.0017391
PA14_01490	820.641	0.258221	0.069247	3.72898	0.000192253	0.000865139
PA14_01500	1174.8	-0.0639672	0.0645005	-0.991732	0.321328	0.529087
PA14_01510	3208.4	0.489813	0.0540157	9.06799	1.21237e-19	1.43439e-18
PA14_01520	545.626	0.064088	0.0765829	0.836845	0.40268	0.611963
PA14_01540	937.201	-0.0430847	0.0700551	-0.615012	0.538547	0.730977
PA14_01550	205.174	-0.77387	0.142782	-5.41993	5.96233e-08	3.81737e-07
PA14_01580	148.625	0.0128458	0.141426	0.0908311	0.927627	0.964558
PA14_01600	292.107	-3.90502	0.148911	-26.2238	1.42274e-151	1.79549e-149
PA14_01610	83.6608	-0.389541	0.196231	-1.98511	0.0471321	0.125018
PA14_01620	1025.86	-0.0167493	0.0689925	-0.24277	0.808183	0.900819
PA14_01640	31.3104	-0.138329	0.32812	-0.42158	0.673332	0.825886
PA14_01660	47.58	-0.106311	0.23876	-0.445265	0.656128	0.814685
PA14_01670	93.9946	-0.0691178	0.172832	-0.399912	0.689221	0.836113
PA14_01680	663.751	0.0231824	0.0837638	0.276759	0.781965	0.889964
PA14_01690	769.996	0.095009	0.084981	1.118	0.263566	0.460409
PA14_01710	2309.23	-0.0625041	0.0503152	-1.24225	0.214144	0.397304
PA14_01720	3310.77	0.209266	0.0583992	3.58338	0.000339181	0.00147489
PA14_01730	883.761	0.055767	0.0659886	0.8451	0.398055	0.607676
PA14_01750	500.23	1.48784	0.0811675	18.3305	4.72822e-75	1.94577e-73
PA14_01760	4.3549	-0.445751	0.784806	-0.567976	0.570051	0.756857
PA14_01770	11302.6	0.0722688	0.0599371	1.20575	0.227916	0.415693
PA14_01780	412.846	-0.0679686	0.0834134	-0.81484	0.415164	0.623045
PA14_01790	290.623	0.719321	0.114443	6.28538	3.27042e-10	2.45023e-09
PA14_01800	491.782	-0.0757623	0.0915823	-0.82726	0.40809	0.616234
PA14_01810	1120	0.258174	0.0793943	3.25179	0.00114681	0.00456715
PA14_01830	738.133	-0.125974	0.0692818	-1.81828	0.069021	0.169684
PA14_01840	498.136	0.291732	0.0893442	3.26526	0.00109364	0.00437997
PA14_01860	1202.68	0.166512	0.0798913	2.08423	0.037139	0.102734
PA14_01870	475.9	-0.182623	0.0869165	-2.10113	0.0356297	0.0995973
PA14_01890	1047.52	0.156947	0.074329	2.11152	0.034728	0.0974889
PA14_01910	336.201	-0.0860807	0.0997904	-0.862615	0.388349	0.599663
PA14_01930	1411.4	0.00129548	0.0598142	0.0216585	0.98272	0.992317
PA14_01940	294.559	-0.0400611	0.111852	-0.358162	0.720222	0.856616
PA14_01960	195.733	0.204039	0.118099	1.7277	0.084042	0.199113
PA14_01970	336.73	-0.0606237	0.118484	-0.511661	0.608888	0.782856
PA14_01980	2104.85	0.152655	0.0511926	2.98197	0.002864	0.0107216
PA14_01990	405.143	0.0303657	0.0881604	0.344437	0.730517	0.863218
PA14_02010	2181.23	0.581939	0.0510722	11.3944	4.4577e-30	7.09112e-29
PA14_02020	742.388	0.0636408	0.0808873	0.786784	0.431408	0.638179
PA14_02030	445.217	0.190195	0.0948768	2.00465	0.0450006	0.12066
PA14_02050	0.134642	-0.412941	3.53381	-0.116854	0.906976	0.953752
PA14_02060	77.6674	-0.088223	0.185617	-0.475296	0.634576	0.799946
PA14_02070	1821.84	-0.0255281	0.0515612	-0.495104	0.620527	0.790306
PA14_02090	1382.56	0.178684	0.065823	2.71461	0.00663539	0.0228157
PA14_02100	1845.73	-0.277498	0.0589378	-4.70832	2.49762e-06	1.3838e-05
PA14_02110	0.216758	1.66179	3.52023	0.472069	0.636878	0.801424
PA14_02130	612.948	-0.0242353	0.0776903	-0.311947	0.755081	0.877451
PA14_02140	1342.23	0.0334385	0.0626344	0.533869	0.593432	0.773314
PA14_02150	1055.92	0.0233354	0.0841543	0.277293	0.781555	0.889964
PA14_02180	3188.11	0.293955	0.0632815	4.64519	3.39765e-06	1.86428e-05
PA14_02190	863.644	0.00376891	0.0799391	0.0471473	0.962396	0.981405
PA14_02200	1559.12	0.00718425	0.0649191	0.110665	0.911882	0.956439
PA14_02220	291.505	-0.128354	0.105579	-1.21572	0.224092	0.411053
PA14_02230	2972.18	0.00331867	0.0501009	0.0662397	0.947187	0.975192
PA14_02250	603.403	-0.0446704	0.0916348	-0.487483	0.625916	0.794593
PA14_02260	37.6243	0.209469	0.278591	0.751887	0.452119	0.657604
PA14_02270	250.877	0.0748805	0.112483	0.665707	0.505598	0.706345
PA14_02290	164.182	0.074659	0.129064	0.578465	0.56295	0.751173
PA14_02300	286.557	0.113251	0.0966531	1.17172	0.241309	0.433668
PA14_02310	174.617	-0.0460429	0.122606	-0.375537	0.707261	0.847116
PA14_02330	754.566	-0.090937	0.114557	-0.793814	0.427303	0.634918
PA14_02340	80.0464	0.429246	0.207183	2.07182	0.0382826	0.105282
PA14_02360	555.255	0.547779	0.0753218	7.27252	3.52852e-13	3.11156e-12
PA14_02370	373.322	0.139006	0.0948113	1.46613	0.142612	0.297428
PA14_02380	857.348	0.10247	0.077357	1.32464	0.185292	0.357066
PA14_02390	99.1989	-0.0875324	0.163881	-0.534121	0.593258	0.773264
PA14_02410	573.469	-0.2222	0.0843613	-2.63391	0.0084408	0.0283138
PA14_02420	439.081	1.23778	0.0842265	14.6959	6.85006e-49	1.67679e-47
PA14_02450	2146.12	0.237303	0.055541	4.27258	1.93223e-05	9.79744e-05
PA14_02460	2159.28	0.342673	0.0706183	4.85247	1.21935e-06	6.98052e-06
PA14_02470	945.934	-0.245477	0.0673795	-3.6432	0.000269267	0.00119187
PA14_02490	1111.42	0.805014	0.0848276	9.48999	2.31057e-21	2.90304e-20
PA14_02500	97.4157	0.0698377	0.155907	0.447944	0.654193	0.814015
PA14_02510	1559.79	0.152523	0.0717485	2.1258	0.0335199	0.0943803
PA14_02520	257.583	0.198064	0.121416	1.63129	0.102829	0.233722
PA14_02530	50.0313	0.107339	0.222067	0.483366	0.628836	0.796423
PA14_02550	841.366	0.515542	0.068829	7.49018	6.87776e-14	6.3202e-13
PA14_02560	1750.01	0.38817	0.0673077	5.76709	8.06519e-09	5.49188e-08
PA14_02570	114.446	-0.170073	0.175734	-0.967788	0.33315	0.540589
PA14_02580	28.7683	-0.634285	0.290166	-2.18594	0.0288201	0.0833348
PA14_02590	140.942	0.0745546	0.142745	0.522292	0.601467	0.779669
PA14_02610	293.655	-0.0111838	0.104057	-0.107478	0.91441	0.957425
PA14_02620	148.991	-0.394068	0.137763	-2.86048	0.00423005	0.0152427
PA14_02630	334.558	-0.142824	0.0953141	-1.49846	0.134014	0.284842
PA14_02640	578.579	-0.0479626	0.0832498	-0.576128	0.564529	0.752114
PA14_02650	55.444	0.467275	0.230609	2.02626	0.0427378	0.115465
PA14_02660	912.352	-0.110662	0.0803273	-1.37763	0.168316	0.331554
PA14_02680	124.61	0.0178831	0.139039	0.12862	0.897659	0.949488
PA14_02690	509.554	-0.0734085	0.0834885	-0.879264	0.379258	0.59138
PA14_02700	175.648	-0.0818684	0.129225	-0.633532	0.526386	0.722239
PA14_02720	2461.97	0.0674051	0.0532181	1.26658	0.205305	0.385685
PA14_02730	555.017	-0.116269	0.0787123	-1.47713	0.13964	0.293336
PA14_02740	192.935	1.4547	0.141442	10.2848	8.2529e-25	1.14313e-23
PA14_02750	2781.77	-0.0589044	0.0473529	-1.24394	0.21352	0.396527
PA14_02760	695.65	-0.0887781	0.0666562	-1.33188	0.182899	0.353174
PA14_02770	669.583	-0.0516205	0.0797597	-0.6472	0.517502	0.715583
PA14_02790	489.27	-0.0520715	0.0774842	-0.672027	0.501567	0.702951
PA14_02810	424.693	-0.0629525	0.0926379	-0.679554	0.496787	0.697985
PA14_02830	603.101	-0.108896	0.0973478	-1.11863	0.263299	0.460171
PA14_02840	1319.38	0.0168881	0.0585305	0.288535	0.772937	0.886949
PA14_02850	1195.86	-0.0953902	0.060215	-1.58416	0.113157	0.250926
PA14_02870	561.589	-0.125748	0.0835965	-1.50422	0.132525	0.282511
PA14_02890	473.661	-0.339804	0.0853486	-3.98137	6.85201e-05	0.000326447
PA14_02900	1135.82	-0.0270488	0.0582311	-0.464507	0.642285	0.805615
PA14_02910	280.195	-0.0107875	0.102842	-0.104893	0.916461	0.958839
PA14_02930	3331.97	0.0449051	0.053013	0.847059	0.396962	0.606499
PA14_02960	68.0483	0.146419	0.233996	0.625733	0.53149	0.725038
PA14_02970	274.869	-0.0888047	0.10135	-0.876221	0.38091	0.593141
PA14_02980	440.02	0.0614174	0.0975348	0.629698	0.528892	0.724452
PA14_02990	381.937	0.121698	0.0895012	1.35973	0.173914	0.339402
PA14_03000	397.9	-0.286948	0.0872224	-3.28984	0.00100246	0.00402899
PA14_03010	2130.25	-0.0503013	0.0559403	-0.899196	0.368548	0.58074
PA14_03020	106.088	0.0135055	0.163336	0.0826851	0.934102	0.96767
PA14_03030	242.301	-0.132401	0.106227	-1.2464	0.212618	0.395498
PA14_03050	642.817	-0.14642	0.0752687	-1.9453	0.0517392	0.134972
PA14_03070	82.2744	-0.322218	0.176599	-1.82457	0.0680655	0.168062
PA14_03080	89.633	-0.251467	0.171268	-1.46827	0.142032	0.296981
PA14_03090	404.165	0.0506974	0.105784	0.479255	0.631757	0.797709
PA14_03100	185.609	0.535906	0.125245	4.27886	1.87854e-05	9.55933e-05
PA14_03110	963.526	0.0447079	0.0875622	0.510584	0.609643	0.783382
PA14_03120	4218.59	0.0721267	0.0484734	1.48796	0.13676	0.288722
PA14_03130	209.914	0.000370006	0.124627	0.00296891	0.997631	0.999241
PA14_03150	500.337	0.228119	0.0871848	2.6165	0.00888376	0.0295726
PA14_03160	1036.42	0.0731289	0.0638908	1.14459	0.252378	0.448593
PA14_03163	201.784	-0.277456	0.122595	-2.26319	0.0236238	0.0703345
PA14_03166	348.202	0.0272529	0.0939639	0.290035	0.771789	0.886684
PA14_03170	2194.55	-0.0331941	0.0615353	-0.539432	0.589589	0.771314
PA14_03180	502.29	-0.227802	0.108325	-2.10294	0.0354709	0.09928
PA14_03190	1113.31	0.0286986	0.0746109	0.384644	0.700501	0.843364
PA14_03200	11.9295	-0.935198	0.521469	-1.79339	0.0729105	0.177708
PA14_03210	417.88	0.0211847	0.0832693	0.254412	0.799177	0.897024
PA14_03220	455.234	0.058664	0.114296	0.513265	0.607766	0.782116
PA14_03240	36.5895	0.213358	0.27265	0.782534	0.433901	0.641028
PA14_03250	156.051	0.0426085	0.144673	0.294516	0.768363	0.885881
PA14_03265	2310.24	0.096656	0.0623341	1.55061	0.120995	0.263773
PA14_03270	414.884	-0.0948593	0.0849778	-1.11628	0.264301	0.461284
PA14_03285	1333.32	0.972607	0.0625025	15.5611	1.33831e-54	3.70745e-53
PA14_03290	1151.8	-0.0137511	0.0682846	-0.201379	0.840403	0.919231
PA14_03300	4662.37	0.282063	0.0737307	3.82559	0.000130461	0.000599423
PA14_03310	485.147	-0.0600974	0.0967858	-0.620932	0.534644	0.727965
PA14_03320	1175.38	-0.00629196	0.101641	-0.0619037	0.95064	0.975452
PA14_03330	10.4683	-0.764068	0.492286	-1.55208	0.120643	0.263309
PA14_03340	273.226	-0.0622683	0.107045	-0.581704	0.560766	0.749423
PA14_03350	3363.72	0.585356	0.0453417	12.9099	3.95842e-38	7.6723e-37
PA14_03360	61.7605	0.394753	0.218836	1.80388	0.0712508	0.174358
PA14_03370	32.7264	-0.583648	0.277789	-2.10105	0.0356369	0.0995973
PA14_03380	409.53	0.566229	0.0868505	6.51959	7.05019e-11	5.49973e-10
PA14_03390	302.054	0.0178891	0.103436	0.172948	0.862692	0.9321
PA14_03400	195.014	-0.0670475	0.138172	-0.485245	0.627502	0.795799
PA14_03410	194.292	-10.8922	1.02488	-10.6278	2.21261e-26	3.19731e-25
PA14_03420	809.463	-0.0105755	0.0751939	-0.140643	0.888152	0.944633
PA14_03430	25.7112	-0.274279	0.314865	-0.871102	0.383699	0.595362
PA14_03450	2435.5	-0.0585133	0.0503419	-1.16232	0.245106	0.438965
PA14_03470	0.641698	0.191276	1.9284	0.0991888	0.920988	0.96059
PA14_03480	201.293	-0.158483	0.125799	-1.25981	0.207739	0.388843
PA14_03490	103.247	-0.136064	0.206256	-0.659687	0.509455	0.70896
PA14_03510	3773.89	0.0857058	0.0575376	1.48956	0.136339	0.288047
PA14_03520	648.627	0.284104	0.073293	3.87628	0.000106066	0.000494541
PA14_03530	2408.43	0.0272457	0.0553281	0.492439	0.622409	0.792169
PA14_03550	643.511	0.170962	0.0727748	2.3492	0.0188139	0.0577478
PA14_03560	76.3679	-0.474112	0.194011	-2.44374	0.014536	0.0460401
PA14_03580	498.119	0.0200973	0.0815061	0.246574	0.805238	0.900221
PA14_03590	894.471	0.121912	0.0691494	1.76302	0.0778975	0.187688
PA14_03610	599.614	1.2443	0.0803817	15.4799	4.74051e-54	1.2943e-52
PA14_03620	690.131	-2.13312	0.0993661	-21.4673	3.14663e-102	2.00784e-100
PA14_03630	457.3	0.0633081	0.0857224	0.738524	0.460196	0.66517
PA14_03650	2506.7	0.0701753	0.0586695	1.19611	0.231653	0.421248
PA14_03670	661.943	-0.0991834	0.0838297	-1.18315	0.236748	0.428183
PA14_03680	483.497	-0.233681	0.111865	-2.08895	0.0367122	0.101801
PA14_03700	936.933	0.813324	0.0843673	9.64027	5.40434e-22	6.89691e-21
PA14_03710	762.402	-0.0624607	0.0974111	-0.641207	0.521388	0.718855
PA14_03720	67.9539	0.180239	0.189131	0.952987	0.340597	0.550208
PA14_03730	29.9666	-6.76275	0.981456	-6.89054	5.55829e-12	4.60811e-11
PA14_03760	304.007	-1.63601	0.109873	-14.8901	3.82307e-50	9.56442e-49
PA14_03770	104.174	-3.01321	0.205715	-14.6475	1.39705e-48	3.40509e-47
PA14_03780	1213.25	-0.0790222	0.0671587	-1.17665	0.239335	0.431459
PA14_03790	14.4272	-0.226973	0.413467	-0.548951	0.583039	0.766808
PA14_03800	690.414	-0.0115542	0.0720458	-0.160373	0.872587	0.937284
PA14_03810	1239.56	-0.233512	0.0624112	-3.74151	0.000182914	0.000826388
PA14_03830	489.169	-0.422279	0.0979968	-4.30911	1.63914e-05	8.40134e-05
PA14_03840	145.789	0.437882	0.135491	3.23181	0.00123009	0.00487828
PA14_03855	227.786	-0.165373	0.117552	-1.40682	0.159482	0.319471
PA14_03860	513.487	0.0790494	0.090868	0.869936	0.384335	0.595501
PA14_03870	228.547	0.0749834	0.119464	0.627665	0.530223	0.724645
PA14_03880	2837.64	0.0790902	0.0528751	1.49579	0.134707	0.285662
PA14_03900	194.169	0.0875989	0.127818	0.685339	0.49313	0.694737
PA14_03920	1062.25	0.0296277	0.0761554	0.389042	0.697245	0.841117
PA14_03930	1750.84	-0.125476	0.0537227	-2.33562	0.019511	0.0596356
PA14_03940	141.821	0.0856433	0.136558	0.627155	0.530557	0.724645
PA14_03950	1070.24	-0.185566	0.0707148	-2.62414	0.0086868	0.0290483
PA14_03960	1232.52	0.162986	0.0613017	2.65875	0.00784307	0.026544
PA14_03980	3791	0.0217936	0.0579538	0.376052	0.706878	0.847116
PA14_04000	30.3038	0.0846728	0.284462	0.29766	0.765963	0.884846
PA14_04010	560.379	-0.0444401	0.0895161	-0.496448	0.619579	0.789629
PA14_04020	5.57784	-1.94606	0.78248	-2.48705	0.0128809	0.0412644
PA14_04030	1680.26	0.20826	0.0558211	3.73085	0.000190835	0.000859439
PA14_04040	1001.77	0.393512	0.0685056	5.74423	9.23379e-09	6.2427e-08
PA14_04050	1454.86	0.224157	0.0632904	3.54173	0.000397517	0.00171282
PA14_04060	102.635	0.613385	0.160548	3.82057	0.000133146	0.000611266
PA14_04070	691.103	-0.0891003	0.0753518	-1.18246	0.237024	0.428545
PA14_04080	3065.4	0.0868114	0.0534667	1.62365	0.10445	0.236418
PA14_04090	86.8135	0.0627952	0.182439	0.344198	0.730698	0.863218
PA14_04100	562.505	-0.00691983	0.0910392	-0.0760094	0.939412	0.971118
PA14_04110	302.119	-0.173521	0.105341	-1.64724	0.0995096	0.228375
PA14_04140	1914.99	-0.20621	0.064019	-3.22108	0.00127711	0.00504009
PA14_04150	1133.92	0.130894	0.0658029	1.98919	0.0466804	0.124168
PA14_04180	8.79629	-1.20812	0.611333	-1.97621	0.0481315	0.126839
PA14_04190	792.918	-0.0625125	0.0685788	-0.911543	0.36201	0.574114
PA14_04210	228.457	0.00199715	0.105726	0.0188899	0.984929	0.993129
PA14_04220	1638.88	0.0693356	0.0923841	0.750514	0.452945	0.658376
PA14_04230	2195.08	0.00952845	0.0738984	0.12894	0.897405	0.949397
PA14_04240	685.77	0.445148	0.0845849	5.26274	1.41925e-07	8.84731e-07
PA14_04250	289.545	0.0145328	0.116077	0.125199	0.900366	0.951112
PA14_04270	748.758	0.670084	0.0670669	9.99127	1.66435e-23	2.21354e-22
PA14_04290	137.259	-0.119709	0.147948	-0.809128	0.418441	0.626669
PA14_04300	1512.85	0.0186196	0.057089	0.326151	0.74431	0.870876
PA14_04310	1675.89	-6.00086	0.119763	-50.1061	0	0
PA14_04320	469.301	0.0238583	0.0841403	0.283554	0.776752	0.888454
PA14_04330	82.4709	-0.123708	0.192422	-0.6429	0.520289	0.718037
PA14_04340	420.463	0.204156	0.0941351	2.16876	0.0301012	0.0861617
PA14_04350	732.472	-0.0976267	0.0724312	-1.34785	0.177705	0.344786
PA14_04370	924.837	-0.112872	0.0713797	-1.58129	0.113812	0.25217
PA14_04380	28.0477	-0.298056	0.322217	-0.925018	0.354957	0.566554
PA14_04390	2970.4	-0.135699	0.0522848	-2.59539	0.00944836	0.0312688
PA14_04410	485.737	-0.156712	0.0790044	-1.98359	0.0473017	0.125229
PA14_04420	463.89	0.0432358	0.0858709	0.503498	0.614614	0.786125
PA14_04430	25.791	-0.678758	0.318972	-2.12796	0.0333407	0.0940128
PA14_04440	73.303	0.952434	0.184354	5.16632	2.38753e-07	1.4595e-06
PA14_04460	731.646	-0.0912819	0.0720898	-1.26623	0.205432	0.385797
PA14_04480	20.949	1.18226	0.349158	3.38602	0.000709153	0.00292043
PA14_04490	726.488	0.0290346	0.0863287	0.336327	0.736625	0.867553
PA14_04510	393.39	-0.0380163	0.0889715	-0.427286	0.669171	0.823211
PA14_04520	79.7978	0.100751	0.241383	0.417389	0.676394	0.828389
PA14_04530	129.299	-0.117511	0.153585	-0.765121	0.4442	0.649822
PA14_04550	287.496	-0.599023	0.0974748	-6.14541	7.97551e-10	5.8822e-09
PA14_04560	1429.08	0.181172	0.0548589	3.30251	0.000958251	0.00386499
PA14_04570	964.167	0.0397353	0.0714274	0.556303	0.578003	0.763013
PA14_04590	763.313	-0.189111	0.103444	-1.82814	0.0675286	0.166955
PA14_04610	550.61	-0.0955732	0.0998728	-0.956949	0.338593	0.547514
PA14_04630	253.717	-0.303167	0.105625	-2.87022	0.00410191	0.014828
PA14_04640	2854.34	-0.116803	0.0928499	-1.25798	0.208399	0.389437
PA14_04650	198.3	0.509536	0.121068	4.20869	2.56853e-05	0.000128066
PA14_04660	101.084	-0.0906272	0.153469	-0.590524	0.55484	0.744171
PA14_04670	23.1755	0.214527	0.334205	0.641903	0.520936	0.718406
PA14_04690	23.4009	-0.483374	0.375672	-1.28669	0.198202	0.375573
PA14_04700	447.524	0.0231815	0.090048	0.257435	0.796843	0.895868
PA14_04710	189.404	0.0351861	0.126917	0.277237	0.781598	0.889964
PA14_04730	1520.34	0.413163	0.0544439	7.58878	3.22925e-14	3.01627e-13
PA14_04750	112.197	-8.67689	0.959801	-9.0403	1.56244e-19	1.83708e-18
PA14_04760	147.78	-2.54708	0.164333	-15.4995	3.49579e-54	9.59062e-53
PA14_04780	307.177	0.0692693	0.0947247	0.73127	0.464614	0.669107
PA14_04790	840.017	0.0129596	0.0709511	0.182656	0.855068	0.927629
PA14_04810	2006.93	-0.115455	0.0578129	-1.99705	0.0458197	0.122337
PA14_04820	781.869	0.182468	0.0799335	2.28275	0.022445	0.067335
PA14_04830	1746.84	-0.010961	0.0728912	-0.150375	0.880469	0.940701
PA14_04860	858.948	-0.139766	0.0737524	-1.89507	0.0580831	0.14752
PA14_04870	477.482	-0.41257	0.0856663	-4.81601	1.46458e-06	8.27596e-06
PA14_04900	27.9617	-8.09188	1.04842	-7.71819	1.17997e-14	1.12813e-13
PA14_04910	1458.33	0.26116	0.0621486	4.20219	2.64349e-05	0.000131572
PA14_04920	4.6994	-0.161496	0.702418	-0.229914	0.818158	0.906776
PA14_04940	977.97	0.0654207	0.0736711	0.88801	0.374535	0.586751
PA14_04950	21.6057	0.244607	0.3533	0.692351	0.488717	0.691092
PA14_04960	11.4755	-0.856991	0.523721	-1.63635	0.101767	0.232569
PA14_04970	1087.54	0.491658	0.214209	2.29522	0.0217203	0.0654029
PA14_04980	491.425	0.0397511	0.0888318	0.447488	0.654523	0.814247
PA14_05000	363.244	0.15738	0.0967817	1.62613	0.103921	0.23569
PA14_05010	615.017	0.0225594	0.0906709	0.248805	0.803511	0.899318
PA14_05020	1783.52	0.241421	0.0597362	4.04146	5.312e-05	0.000255435
PA14_05030	0.710604	0.582113	2.30879	0.252128	0.800942	0.897587
PA14_05040	291.207	-0.267711	0.101679	-2.63289	0.00846612	0.0283677
PA14_05050	1096.6	0.034277	0.0626285	0.547308	0.584167	0.767226
PA14_05060	758.416	-0.187132	0.0808158	-2.31554	0.0205834	0.0624514
PA14_05070	2482.02	0.00514108	0.0684436	0.0751141	0.940124	0.971427
PA14_05080	224.234	0.0772462	0.112542	0.686378	0.492475	0.694159
PA14_05110	402.287	0.289152	0.0864549	3.34454	0.0008242	0.00335049
PA14_05120	248.956	0.0485707	0.110197	0.440762	0.659386	0.816693
PA14_05130	806.229	-0.273929	0.106461	-2.57306	0.0100804	0.0331097
PA14_05150	334.245	-0.145898	0.0898495	-1.6238	0.104418	0.236418
PA14_05160	653.312	-0.287086	0.0757728	-3.78877	0.000151395	0.00069058
PA14_05180	319.698	-0.0271134	0.118128	-0.229525	0.818461	0.906934
PA14_05190	3017.64	0.0569888	0.0556701	1.02369	0.305983	0.512136
PA14_05200	975.638	0.0564182	0.0724314	0.778919	0.436028	0.642335
PA14_05210	494.11	-0.17095	0.083562	-2.04578	0.040778	0.110962
PA14_05220	361.764	0.0436468	0.0982626	0.444185	0.656909	0.815146
PA14_05230	2371.48	0.136882	0.058679	2.33273	0.0196626	0.0600343
PA14_05250	458.958	0.00756752	0.115369	0.0655941	0.947701	0.975192
PA14_05260	212.03	-2.21751	0.139235	-15.9263	4.16039e-57	1.2501e-55
PA14_05270	741.338	-0.00218483	0.0850277	-0.0256956	0.9795	0.99016
PA14_05280	2176.41	1.37255	0.0617755	22.2184	2.2818e-109	1.6403e-107
PA14_05290	163.07	-3.35378	0.189076	-17.7377	2.14408e-70	7.80529e-69
PA14_05300	203.438	0.0803938	0.114901	0.699677	0.484129	0.686767
PA14_05310	72.1876	-0.12452	0.190141	-0.654885	0.512542	0.712022
PA14_05320	1684.66	-0.216189	0.0820028	-2.63637	0.00837995	0.0281763
PA14_05330	1648.03	0.112045	0.0589845	1.89956	0.0574907	0.146408
PA14_05340	63.7645	0.0806442	0.2422	0.332965	0.73916	0.868412
PA14_05360	249.926	-0.0695554	0.130216	-0.534156	0.593234	0.773264
PA14_05380	273.182	-0.488501	0.118272	-4.13032	3.62256e-05	0.000177656
PA14_05390	1128.6	0.0785293	0.0656505	1.19617	0.231629	0.421248
PA14_05400	986.542	0.234891	0.0624582	3.76077	0.00016939	0.00076773
PA14_05410	252.252	-1.71801	0.112947	-15.2107	3.00331e-52	7.82376e-51
PA14_05420	604.654	-0.00125375	0.0821971	-0.015253	0.98783	0.99378
PA14_05430	14.7925	0.343377	0.496602	0.691452	0.489281	0.691717
PA14_05440	293.212	0.380431	0.101426	3.75084	0.000176246	0.000798167
PA14_05460	343.14	0.0189898	0.0937616	0.202533	0.8395	0.918693
PA14_05480	719.418	-0.0470097	0.0704004	-0.667748	0.504295	0.705218
PA14_05510	639.347	-0.0578288	0.0818155	-0.706819	0.479679	0.682902
PA14_05520	1963.93	0.181662	0.0510154	3.56092	0.000369563	0.001596
PA14_05530	363.645	-1.06981	0.105084	-10.1805	2.42248e-24	3.315e-23
PA14_05540	198.229	-0.72783	0.122419	-5.94539	2.75804e-09	1.9677e-08
PA14_05550	29.5508	-0.461312	0.318618	-1.44785	0.147658	0.304153
PA14_05560	2.34015	-0.610903	1.04194	-0.586313	0.557666	0.746226
PA14_05580	472.824	0.126698	0.0913047	1.38764	0.165246	0.327895
PA14_05590	3977.19	0.0772162	0.0499449	1.54603	0.122098	0.265669
PA14_05600	510.579	-0.0753568	0.103148	-0.73057	0.465042	0.669107
PA14_05620	264.295	-1.26629	0.103456	-12.2398	1.90421e-34	3.348e-33
PA14_05630	1114.49	0.026001	0.0677697	0.383666	0.701226	0.843878
PA14_05650	683.884	0.0171243	0.0737883	0.232073	0.816481	0.905624
PA14_05660	530.214	0.930979	0.0856284	10.8723	1.56191e-27	2.33423e-26
PA14_05690	813.863	-0.0471154	0.0674865	-0.698145	0.485086	0.687499
PA14_05700	954.829	-0.122533	0.0782038	-1.56685	0.11715	0.257183
PA14_05740	603.194	-0.196813	0.0784322	-2.50934	0.0120956	0.039051
PA14_05750	351.489	0.0519697	0.0988206	0.525899	0.598958	0.778017
PA14_05770	1070.92	0.149191	0.0841046	1.77388	0.0760837	0.184256
PA14_05775	115.59	0.101319	0.164952	0.614234	0.53906	0.731166
PA14_05790	374.628	-0.0394457	0.106217	-0.371368	0.710363	0.848735
PA14_05810	120.017	0.0499912	0.145045	0.344659	0.730351	0.863218
PA14_05820	41.4382	-1.40694	0.251935	-5.58455	2.34311e-08	1.54907e-07
PA14_05840	1539.72	-0.0704733	0.0770732	-0.914369	0.360523	0.572542
PA14_05850	556.244	0.0935589	0.0801179	1.16776	0.242902	0.435704
PA14_05860	389.654	0.0355326	0.120988	0.293687	0.768997	0.886062
PA14_05870	66.6503	-0.61424	0.260865	-2.35463	0.0185414	0.0570713
PA14_05880	778.004	0.0734465	0.0735589	0.998473	0.31805	0.525213
PA14_05890	1841.34	0.0238611	0.0620294	0.384673	0.700479	0.843364
PA14_05910	210.641	0.0847399	0.118865	0.712906	0.475904	0.679743
PA14_05920	10.2227	-6.64152	1.09132	-6.08575	1.15948e-09	8.47453e-09
PA14_05950	89.1501	-0.208485	0.171723	-1.21408	0.224719	0.41167
PA14_05960	405.141	1.51213	0.0954416	15.8436	1.55738e-56	4.56265e-55
PA14_05970	256.954	-0.0535145	0.117702	-0.45466	0.649354	0.810123
PA14_05990	529.732	0.284006	0.0791429	3.58852	0.000332563	0.00144722
PA14_06010	7.05805	1.32851	0.710868	1.86885	0.0616434	0.154899
PA14_06030	901.764	-0.48012	0.0664532	-7.22493	5.01353e-13	4.38703e-12
PA14_06040	239.959	0.096245	0.137077	0.702121	0.482604	0.685176
PA14_06060	459.04	-0.153971	0.0885465	-1.73887	0.0820573	0.195425
PA14_06070	825.411	0.115215	0.0689856	1.67013	0.0948936	0.220319
PA14_06080	179.045	0.00395332	0.134816	0.0293238	0.976606	0.989853
PA14_06090	45.1308	0.0622067	0.234816	0.264917	0.791074	0.892788
PA14_06120	444.749	-0.0596118	0.0965791	-0.617233	0.537081	0.729511
PA14_06130	378.893	0.0216008	0.0993781	0.21736	0.827928	0.912794
PA14_06150	1249.49	-0.0722958	0.0846893	-0.853659	0.393294	0.60349
PA14_06160	961.035	-0.033328	0.0777752	-0.428517	0.668275	0.82294
PA14_06170	574.27	-0.127708	0.0937231	-1.36261	0.173007	0.337863
PA14_06180	22.0178	-0.297576	0.359707	-0.827274	0.408082	0.616234
PA14_06190	509.363	-0.0221198	0.0784736	-0.281876	0.778039	0.889032
PA14_06200	495.552	-1.36079	0.0850446	-16.0009	1.25942e-57	3.84531e-56
PA14_06210	783.873	-0.123821	0.0710042	-1.74385	0.0811854	0.193882
PA14_06230	249.157	-0.154224	0.109174	-1.41265	0.157758	0.317936
PA14_06240	343.362	0.190377	0.0925503	2.05701	0.0396856	0.108405
PA14_06250	1152.46	-0.178485	0.0621053	-2.87391	0.00405423	0.014665
PA14_06260	576.237	-0.214344	0.0790929	-2.71003	0.00672779	0.0230998
PA14_06270	1397.46	0.0378352	0.062126	0.609006	0.54252	0.733699
PA14_06280	911.93	0.0121743	0.0653512	0.18629	0.852217	0.925847
PA14_06290	866.157	-0.00320837	0.0708032	-0.0453139	0.963857	0.982366
PA14_06300	161.542	-0.148379	0.130021	-1.14119	0.253792	0.449863
PA14_06310	284.837	-1.69221	0.115954	-14.5938	3.07556e-48	7.46414e-47
PA14_06320	304.013	-5.89671	0.533855	-11.0455	2.30397e-28	3.54586e-27
PA14_06330	314.348	0.0648381	0.104022	0.623314	0.533078	0.72668
PA14_06340	830.483	0.0373076	0.0686316	0.543592	0.586722	0.769159
PA14_06350	189.346	-1.77061	0.131339	-13.4813	2.0165e-41	4.24136e-40
PA14_06360	801.394	0.5539	0.073814	7.504	6.18974e-14	5.70642e-13
PA14_06390	475.266	0.100705	0.0868131	1.16002	0.24604	0.440221
PA14_06400	448.028	0.00313652	0.102331	0.0306509	0.975548	0.989458
PA14_06420	3153.07	0.570909	0.0460394	12.4005	2.59825e-35	4.66946e-34
PA14_06430	2113.91	0.166204	0.0520989	3.19016	0.00142192	0.00556137
PA14_06450	1764.82	0.162874	0.0851772	1.91218	0.0558534	0.142943
PA14_06460	1258.75	-0.0276827	0.0626317	-0.441991	0.658496	0.815972
PA14_06480	203.187	0.00617038	0.125372	0.0492164	0.960747	0.98078
PA14_06500	1191.82	-1.75199	0.0833535	-21.0188	4.41913e-98	2.66981e-96
PA14_06510	1.91634	-1.78682	1.2378	-1.44354	0.148867	0.305646
PA14_06530	224.281	-0.170372	0.119181	-1.42953	0.152853	0.310796
PA14_06540	513.07	-1.05941	0.0898983	-11.7845	4.68932e-32	7.76404e-31
PA14_06570	147.694	-0.084615	0.128269	-0.659667	0.509468	0.70896
PA14_06580	172.274	-0.298229	0.136732	-2.18112	0.0291749	0.0840609
PA14_06600	42.5096	-1.90073	0.285903	-6.64817	2.96764e-11	2.36703e-10
PA14_06620	1315.14	0.111704	0.0664626	1.68071	0.0928197	0.216218
PA14_06640	728.39	0.223553	0.0820429	2.72483	0.0064335	0.0222373
PA14_06650	746.503	0.330986	0.066147	5.00379	5.62141e-07	3.30476e-06
PA14_06660	349.754	0.10375	0.0964936	1.0752	0.282285	0.483862
PA14_06670	1809.01	-0.0758584	0.066045	-1.14859	0.250726	0.446404
PA14_06680	63.8958	-0.0737751	0.203893	-0.361832	0.717477	0.8551
PA14_06690	294.299	0.0285018	0.101351	0.281218	0.778543	0.889032
PA14_06700	84.3002	0.245675	0.216056	1.13709	0.255501	0.451459
PA14_06710	341.233	0.754437	0.0941221	8.01552	1.09673e-15	1.08697e-14
PA14_06720	390.793	-0.281918	0.0997346	-2.82669	0.00470323	0.0167459
PA14_06730	94.9541	0.0598174	0.164199	0.364299	0.715635	0.853621
PA14_06740	564.528	0.0252626	0.0841608	0.30017	0.764047	0.883352
PA14_06750	1332.45	0.23904	0.0751439	3.18109	0.00146721	0.00572667
PA14_06770	1678.61	0.0823791	0.0537969	1.5313	0.125696	0.27152
PA14_06790	2289.83	0.00228577	0.0593189	0.0385335	0.969262	0.985576
PA14_06800	522.091	-0.504572	0.0769799	-6.55459	5.57962e-11	4.38266e-10
PA14_06810	351.464	-0.0900723	0.0957575	-0.94063	0.346894	0.557446
PA14_06830	0.108379	1.02973	3.53381	0.291394	0.77075	0.886589
PA14_06840	1823.92	0.143578	0.0694952	2.06602	0.0388266	0.106417
PA14_06860	824.235	0.0540248	0.0656752	0.822605	0.410732	0.618418
PA14_06870	421.912	-0.0843099	0.0884782	-0.952889	0.340646	0.550208
PA14_06875	8020.02	0.359803	0.0397536	9.05081	1.41914e-19	1.67206e-18
PA14_06880	117.424	0.0414761	0.155755	0.266291	0.790015	0.892302
PA14_06890	773.315	-0.0292951	0.0774421	-0.378283	0.70522	0.84623
PA14_06900	675.999	0.0675779	0.0755524	0.894451	0.371081	0.582846
PA14_06920	370.285	0.236891	0.115975	2.0426	0.0410921	0.11171
PA14_06930	434.738	0.0039383	0.0818807	0.048098	0.961638	0.981161
PA14_06940	1187.52	-0.193941	0.080787	-2.40065	0.016366	0.0511403
PA14_06960	1271.15	0.12289	0.060585	2.02839	0.0425208	0.114989
PA14_06970	442.131	-0.08728	0.0838322	-1.04113	0.297816	0.501797
PA14_06980	282.067	-0.00271976	0.103471	-0.0262853	0.97903	0.99016
PA14_06990	375.176	0.0935721	0.108552	0.862006	0.388684	0.599663
PA14_07000	878.778	0.172816	0.0843612	2.04853	0.0405082	0.110281
PA14_07010	5.95464	-0.940816	0.641643	-1.46626	0.142577	0.297428
PA14_07020	2079.18	0.0782603	0.0677905	1.15444	0.248319	0.44346
PA14_07030	1273.56	0.533159	0.0693639	7.6864	1.51336e-14	1.4396e-13
PA14_07040	697.812	0.0324848	0.0709492	0.45786	0.647053	0.80903
PA14_07050	188.533	0.0369474	0.134352	0.275005	0.783312	0.890085
PA14_07060	472.725	-0.210733	0.101725	-2.07161	0.0383021	0.105285
PA14_07070	341.842	-0.111606	0.104774	-1.06521	0.286782	0.488199
PA14_07090	682.363	-0.295164	0.0854535	-3.45409	0.000552163	0.00232105
PA14_07110	89.5558	-7.81025	0.829615	-9.4143	4.76229e-21	5.90504e-20
PA14_07130	384.837	0.168195	0.0923786	1.82071	0.0686508	0.169213
PA14_07140	863.241	-0.141286	0.0631588	-2.237	0.0252862	0.0746363
PA14_07150	517.936	0.0321015	0.0818007	0.392436	0.694736	0.838913
PA14_07170	117.004	0.305006	0.168701	1.80797	0.0706116	0.172984
PA14_07190	865.756	-0.00731019	0.0637456	-0.114678	0.908701	0.954712
PA14_07200	3132.49	0.00238679	0.0493679	0.048347	0.96144	0.981161
PA14_07210	36.3307	-0.281387	0.257789	-1.09154	0.275036	0.475183
PA14_07230	5.48986	-4.27031	1.10861	-3.85196	0.000117175	0.000540568
PA14_07240	1266.79	0.0420651	0.058361	0.720774	0.471048	0.675015
PA14_07250	636.929	0.0122781	0.0808091	0.151939	0.879235	0.940157
PA14_07260	201.18	-0.0886243	0.125954	-0.703626	0.481666	0.684187
PA14_07280	1528.03	0.212146	0.0585465	3.62355	0.000290586	0.00127826
PA14_07290	1039.04	-0.0264847	0.0739977	-0.357913	0.720408	0.856616
PA14_07300	383.139	0.200993	0.0917266	2.19122	0.028436	0.0825181
PA14_07310	546.392	0.516938	0.0812753	6.36034	2.01314e-10	1.53047e-09
PA14_07330	976.683	0.071784	0.0680731	1.05451	0.291648	0.495193
PA14_07340	18.5191	0.3238	0.393584	0.822696	0.410681	0.618418
PA14_07355	96.3828	-5.3052	0.367832	-14.4229	3.71437e-47	8.86299e-46
PA14_07360	255.024	0.237982	0.125193	1.90092	0.0573126	0.14602
PA14_07370	464.133	-0.253862	0.0928333	-2.7346	0.00624561	0.0216405
PA14_07380	379.845	0.0456986	0.0895197	0.510486	0.609711	0.783382
PA14_07400	592.837	-0.00196887	0.090584	-0.0217352	0.982659	0.992317
PA14_07410	896.773	0.100537	0.0720521	1.39534	0.162914	0.324628
PA14_07420	40.7663	0.17494	0.256665	0.681587	0.4955	0.696866
PA14_07430	77.1739	0.171599	0.411781	0.416724	0.67688	0.828449
PA14_07440	3192.03	0.402489	0.0526326	7.64713	2.05517e-14	1.93554e-13
PA14_07450	525.093	-0.144681	0.0787651	-1.83687	0.0662293	0.16453
PA14_07460	182.194	-0.230944	0.125773	-1.8362	0.0663277	0.164703
PA14_07470	596.39	0.253023	0.0733032	3.45173	0.000557005	0.00233794
PA14_07480	642.329	0.00039399	0.0780166	0.00505008	0.995971	0.998256
PA14_07500	196.837	0.82951	0.116636	7.11198	1.14388e-12	9.85753e-12
PA14_07520	2.4776	-4.59589	1.35112	-3.40153	0.000670089	0.00277364
PA14_07530	178.784	0.740433	0.117613	6.29551	3.0639e-10	2.30768e-09
PA14_07550	2.45412	-4.56868	1.3226	-3.45432	0.000551673	0.00232071
PA14_07560	71.7068	-0.356455	0.193826	-1.83905	0.0659078	0.164019
PA14_07570	56.1662	0.639218	0.212392	3.00961	0.00261581	0.00985092
PA14_07580	293.487	-0.0870489	0.110574	-0.787244	0.431139	0.638112
PA14_07590	264.17	-2.60165	0.125936	-20.6585	8.18669e-95	4.4704e-93
PA14_07600	164.511	-2.83236	0.160455	-17.652	9.81589e-70	3.52813e-68
PA14_07620	1363.73	-0.361682	0.0696424	-5.19342	2.06462e-07	1.26893e-06
PA14_07630	213.342	-0.314397	0.116216	-2.70528	0.00682461	0.023404
PA14_07650	285.812	0.419327	0.0986393	4.25111	2.12711e-05	0.000107091
PA14_07660	599.717	0.0715308	0.0944011	0.757732	0.448611	0.654086
PA14_07680	290.921	-0.120147	0.101665	-1.18179	0.237288	0.428763
PA14_07690	554.945	0.042704	0.0783067	0.545343	0.585517	0.768466
PA14_07700	163.275	-0.165394	0.154467	-1.07075	0.284284	0.485694
PA14_07710	3193.31	-0.168212	0.0705337	-2.38484	0.0170863	0.0529947
PA14_07730	309.638	-0.26102	0.101968	-2.55983	0.0104724	0.0342783
PA14_07760	873.564	-0.502259	0.0756783	-6.63676	3.20648e-11	2.55394e-10
PA14_07770	222.652	-3.62629	0.172113	-21.0693	1.52088e-98	9.28718e-97
PA14_07780	225.384	0.194055	0.114475	1.69517	0.0900428	0.211041
PA14_07790	28.1436	0.530402	0.297564	1.78248	0.0746712	0.181221
PA14_07800	664.058	0.140109	0.0974802	1.4373	0.150632	0.308266
PA14_07810	435.509	-0.129688	0.0899404	-1.44193	0.149323	0.306249
PA14_07820	207.896	0.0347872	0.116761	0.297934	0.765754	0.884846
PA14_07840	600.491	-0.032446	0.0734476	-0.441757	0.658665	0.816004
PA14_07850	192.17	-0.362916	0.117923	-3.07758	0.00208688	0.00798611
PA14_07860	2138.63	0.127199	0.0667725	1.90496	0.056785	0.144878
PA14_07870	19.346	0.36673	0.367926	0.99675	0.318886	0.526134
PA14_07890	455.058	-0.706421	0.11199	-6.30786	2.82911e-10	2.13651e-09
PA14_07900	392.591	0.124945	0.0915315	1.36505	0.172238	0.336709
PA14_07910	74.3833	-9.50884	1.03156	-9.2179	3.02965e-20	3.62982e-19
PA14_07930	991.057	0.345009	0.0873706	3.9488	7.85441e-05	0.00037202
PA14_07940	206.979	-0.0650071	0.122644	-0.530047	0.596079	0.775517
PA14_07950	159.154	-3.09605	0.178254	-17.3688	1.42236e-67	4.95558e-66
PA14_07960	251.732	-5.9635	0.277495	-21.4905	1.91222e-102	1.23403e-100
PA14_07970	737.585	-0.0168608	0.0776985	-0.217003	0.828206	0.912923
PA14_07980	755.483	0.0995143	0.0705936	1.40968	0.158635	0.318898
PA14_07990	13.3131	-0.684933	0.454046	-1.50851	0.131424	0.280586
PA14_08000	5063.33	0.633383	0.0578871	10.9417	7.2818e-28	1.10276e-26
PA14_08010	171.949	-0.230942	0.121153	-1.9062	0.0566244	0.144639
PA14_08020	332.858	-0.237328	0.0891524	-2.66205	0.00776674	0.026336
PA14_08030	1257.69	0.482649	0.0642234	7.51517	5.68376e-14	5.26559e-13
PA14_08040	1053.56	0.00385866	0.0687584	0.0561191	0.955247	0.978508
PA14_08050	249.044	0.206493	0.124714	1.65574	0.0977755	0.225352
PA14_08060	1059.1	-0.0640666	0.0653785	-0.979934	0.327119	0.535208
PA14_08070	1780.92	0.168573	0.0694435	2.42749	0.0152037	0.0478347
PA14_08090	839.01	-0.0348671	0.103174	-0.337944	0.735405	0.867334
PA14_08100	327.623	-0.165552	0.14833	-1.11611	0.264376	0.461284
PA14_08110	561.085	-0.145909	0.0792228	-1.84176	0.0655103	0.163316
PA14_08120	343.064	0.507964	0.0971178	5.23039	1.69155e-07	1.04758e-06
PA14_08130	398.824	0.36017	0.0850289	4.23586	2.27683e-05	0.000114022
PA14_08140	57.5502	-8.41259	1.03386	-8.13707	4.04945e-16	4.09196e-15
PA14_08150	547.714	0.0451404	0.0895428	0.504121	0.614176	0.786096
PA14_08160	298.187	0.150626	0.100789	1.49446	0.135054	0.285971
PA14_08180	408.757	-0.0882176	0.0979711	-0.900446	0.367883	0.580013
PA14_08190	1085.43	0.219724	0.0610929	3.59656	0.000322459	0.00140541
PA14_08200	1234.95	0.273555	0.0632196	4.32705	1.51118e-05	7.76652e-05
PA14_08210	1410.31	-0.0450541	0.0675368	-0.667104	0.504706	0.705445
PA14_08220	207.233	0.0440442	0.149069	0.295462	0.767641	0.885687
PA14_08230	26.1146	0.0331187	0.320311	0.103395	0.917649	0.958889
PA14_08250	427.832	0.150659	0.120556	1.2497	0.21141	0.39362
PA14_08260	243.294	0.154412	0.134068	1.15174	0.249429	0.445022
PA14_08270	407.671	-0.0781966	0.101081	-0.773602	0.439166	0.64544
PA14_08280	175.761	-0.0677441	0.134011	-0.505511	0.6132	0.785415
PA14_08300	417.123	-1.50634	0.0917379	-16.4201	1.37419e-60	4.38428e-59
PA14_08310	1851.29	0.0717609	0.0630196	1.13871	0.254825	0.450904
PA14_08320	1369.27	-0.0125594	0.0649432	-0.193391	0.846653	0.922337
PA14_08330	2179.16	-0.0178226	0.0568157	-0.313691	0.753756	0.876988
PA14_08340	188.992	-0.103123	0.120982	-0.852384	0.394001	0.603923
PA14_08350	247.501	0.354053	0.147334	2.40306	0.0162585	0.0508717
PA14_08360	1669.64	0.00642312	0.0543815	0.118112	0.905979	0.953752
PA14_08370	1703.31	0.297733	0.270572	1.10038	0.271166	0.470391
PA14_08380	988.899	0.137968	0.0727822	1.89563	0.0580086	0.147396
PA14_08390	463.252	-0.133125	0.0848798	-1.5684	0.116789	0.256574
PA14_08400	45.9367	-4.30477	0.412337	-10.4399	1.629e-25	2.30127e-24
PA14_08420	1118.22	0.242752	0.070207	3.45766	0.000544895	0.00229389
PA14_08430	209.927	0.0194275	0.117846	0.164855	0.869058	0.93544
PA14_08440	1147.5	-0.0149943	0.0633494	-0.236692	0.812896	0.903059
PA14_08450	1508.35	-0.0892195	0.0588758	-1.51539	0.129675	0.277895
PA14_08460	639.442	-0.0243768	0.0754327	-0.323159	0.746575	0.871828
PA14_08470	332.377	-6.18735	0.262211	-23.5969	4.15134e-123	3.41674e-121
PA14_08480	1715.72	0.639284	0.0606173	10.5462	5.28758e-26	7.54477e-25
PA14_08490	1232.87	0.162297	0.0609679	2.662	0.00776771	0.026336
PA14_08500	122.133	-0.0743565	0.185818	-0.400158	0.68904	0.836113
PA14_08510	114.407	-6.57499	0.500051	-13.1486	1.73269e-39	3.50175e-38
PA14_08520	1017.71	0.115958	0.0600137	1.93219	0.0533356	0.137992
PA14_08540	901.681	0.335521	0.0671848	4.994	5.91411e-07	3.46965e-06
PA14_08560	995.824	0.0161984	0.0798043	0.202977	0.839153	0.918693
PA14_08620	57.0515	-4.29375	0.360257	-11.9186	9.4725e-33	1.6058e-31
PA14_08630	862.15	-0.00132682	0.0648057	-0.0204738	0.983665	0.992756
PA14_08640	1399.83	-0.922297	0.0625365	-14.7482	3.16205e-49	7.80753e-48
PA14_08650	179.477	1.52998	0.138386	11.0558	2.0541e-28	3.16991e-27
PA14_08680	69.7631	-4.39795	0.33457	-13.1451	1.81587e-39	3.64393e-38
PA14_08690	721.787	-11.3655	0.953883	-11.915	9.89021e-33	1.67162e-31
PA14_08695	4318.89	-6.07598	0.0910327	-66.7451	0	0
PA14_08720	185.449	-10.1029	1.02557	-9.85097	6.78855e-23	8.90351e-22
PA14_08730	842.776	0.505978	0.0772966	6.54594	5.91234e-11	4.6312e-10
PA14_08740	163.127	-4.07188	0.216507	-18.8071	6.59937e-79	2.95101e-77
PA14_08750	136.424	-10.3808	1.02736	-10.1043	5.28633e-24	7.14788e-23
PA14_08760	630.441	0.403172	0.0825246	4.88548	1.03179e-06	5.96692e-06
PA14_08780	1147.02	-2.04931	0.0669794	-30.5961	1.37961e-205	3.01339e-203
PA14_08790	367.658	0.815456	0.0883861	9.22607	2.80756e-20	3.378e-19
PA14_08820	338.122	0.0874329	0.10322	0.847056	0.396964	0.606499
PA14_08830	125.751	0.694247	0.162319	4.27705	1.89387e-05	9.62871e-05
PA14_08850	475.982	0.548497	0.0866064	6.33322	2.401e-10	1.82047e-09
PA14_08880	194.182	0.652311	0.118894	5.48648	4.10023e-08	2.6551e-07
PA14_08930	24.8495	0.343221	0.363783	0.943478	0.345437	0.556047
PA14_08970	1.92821	-1.25096	1.1626	-1.076	0.281925	0.483702
PA14_08990	86.4655	0.521326	0.208368	2.50195	0.0123512	0.0397857
PA14_09000	229.707	0.433586	0.106289	4.07932	4.51673e-05	0.000219423
PA14_09020	20.9847	-7.67961	1.05997	-7.2451	4.32109e-13	3.79281e-12
PA14_09030	40.944	-8.64403	1.03919	-8.31807	8.94062e-17	9.28222e-16
PA14_09040	181.295	-5.57437	0.292976	-19.0267	1.0245e-80	4.76898e-79
PA14_09050	1.60859	-3.99078	1.47008	-2.71466	0.00663429	0.0228157
PA14_09080	89.3005	-1.09598	0.474982	-2.30742	0.0210313	0.0635977
PA14_09090	8.75606	-3.10438	0.699498	-4.43802	9.07915e-06	4.77412e-05
PA14_09100	59.6063	0.604382	0.242562	2.49165	0.012715	0.0408187
PA14_09115	39.6449	0.363212	0.278565	1.30387	0.192279	0.366673
PA14_09130	208.05	0.790778	0.127752	6.18995	6.01851e-10	4.46202e-09
PA14_09150	1237.41	-0.120601	0.060297	-2.00012	0.045487	0.121677
PA14_09160	227.888	0.0164613	0.113477	0.145063	0.884661	0.942248
PA14_09180	1.65056	-0.364556	1.29922	-0.280597	0.77902	0.889078
PA14_09195	981.427	-0.658461	0.0809605	-8.13311	4.1842e-16	4.22061e-15
PA14_09200	90.1778	-1.52418	0.177877	-8.56873	1.04628e-17	1.13394e-16
PA14_09210	189.784	-0.128239	0.119807	-1.07038	0.28445	0.485832
PA14_09220	1591.18	0.0440726	0.0570106	0.773061	0.439487	0.64544
PA14_09230	612.502	-0.12529	0.0793826	-1.5783	0.114496	0.252907
PA14_09260	339.577	0.017035	0.109499	0.155572	0.87637	0.938435
PA14_09270	244.231	-0.0587693	0.139582	-0.421037	0.673728	0.826193
PA14_09280	575.365	-0.219093	0.0796657	-2.75016	0.00595667	0.0207533
PA14_09290	184.201	0.301819	0.159952	1.88694	0.0591688	0.149741
PA14_09300	1377.77	-0.0186903	0.079777	-0.234281	0.814766	0.904076
PA14_09320	356.817	-0.0275454	0.109382	-0.251828	0.801174	0.897587
PA14_09340	256.596	0.695617	0.117032	5.94384	2.78424e-09	1.9839e-08
PA14_09350	322.027	0.222124	0.101951	2.17872	0.0293526	0.0843162
PA14_09370	672.533	-0.0439636	0.0979824	-0.448689	0.653656	0.813577
PA14_09380	14.4351	-0.322948	0.432782	-0.746214	0.455538	0.660623
PA14_09400	2037.47	0.00139907	0.0545134	0.0256648	0.979525	0.99016
PA14_09410	2007.17	0.320507	0.0872164	3.67485	0.000237993	0.00106088
PA14_09440	1361.13	0.740181	0.0640309	11.5598	6.58949e-31	1.05711e-29
PA14_09450	3590.03	-0.125233	0.0483171	-2.5919	0.00954482	0.0315512
PA14_09460	822.546	0.10587	0.0966347	1.09557	0.273267	0.473259
PA14_09470	5300.28	0.130828	0.0576125	2.27083	0.0231571	0.069179
PA14_09480	624.839	0.0728163	0.0807793	0.901423	0.367364	0.579355
PA14_09490	75.9586	0.0280758	0.207306	0.135432	0.89227	0.946787
PA14_09500	2880.48	0.0964595	0.0607	1.58912	0.112034	0.248725
PA14_09520	427.718	0.187185	0.0815103	2.29646	0.0216496	0.0652244
PA14_09530	1150.99	0.107042	0.0621294	1.72289	0.0849079	0.200706
PA14_09540	360.456	-0.304697	0.113138	-2.69315	0.00707797	0.0241998
PA14_09550	170.757	0.815605	0.129541	6.29612	3.05181e-10	2.30162e-09
PA14_09570	88.2829	-1.75579	0.204417	-8.58925	8.75405e-18	9.5238e-17
PA14_09580	940.017	-0.0264803	0.0668589	-0.396063	0.692059	0.837158
PA14_09600	27.6205	-0.0577498	0.295572	-0.195383	0.845093	0.921521
PA14_09610	14.6296	-0.601893	0.392936	-1.53178	0.125576	0.271468
PA14_09630	462.146	0.0266341	0.102611	0.259564	0.7952	0.895143
PA14_09680	960.523	0.81765	0.0685269	11.9318	8.07852e-33	1.38187e-31
PA14_09690	2237.73	-0.0397857	0.0577178	-0.689314	0.490626	0.692239
PA14_09700	2498.76	0.267734	0.0533636	5.01718	5.24368e-07	3.08909e-06
PA14_09710	664.063	0.12458	0.0795661	1.56574	0.11741	0.257639
PA14_09730	2674.68	-0.12934	0.0480573	-2.69137	0.0071159	0.0243148
PA14_09740	1171.49	0.0837231	0.064018	1.30781	0.190939	0.364608
PA14_09760	355.417	0.151292	0.0937948	1.61301	0.106743	0.240371
PA14_09770	153.641	-1.67905	0.158595	-10.587	3.42263e-26	4.896e-25
PA14_09780	415.278	-0.498609	0.0965369	-5.16496	2.40489e-07	1.46538e-06
PA14_09790	983.043	-0.0117369	0.0652191	-0.179962	0.857183	0.928465
PA14_09810	1304.42	-0.0375486	0.0580171	-0.647199	0.517503	0.715583
PA14_09820	1460.76	0.0466207	0.0546497	0.853083	0.393613	0.60371
PA14_09850	36.497	-0.24048	0.273348	-0.879758	0.37899	0.59138
PA14_09870	489.238	-0.0513187	0.211384	-0.242774	0.80818	0.900819
PA14_09880	2069.87	0.085672	0.0571787	1.49832	0.13405	0.284842
PA14_09890	913.475	0.145301	0.0714101	2.03474	0.0418769	0.113463
PA14_09900	664.462	0.300773	0.0828461	3.6305	0.000282872	0.00124917
PA14_09910	1780.38	0.130547	0.0668003	1.95429	0.0506674	0.132783
PA14_09920	6.80671	0.0844302	0.589008	0.143343	0.886019	0.943045
PA14_09930	208.929	-0.209086	0.112891	-1.8521	0.0640112	0.159859
PA14_09940	80.101	-0.0525958	0.176255	-0.298407	0.765393	0.884727
PA14_09950	29.1081	-0.473463	0.286167	-1.6545	0.0980258	0.225594
PA14_09960	109.754	0.749947	0.175413	4.27532	1.90861e-05	9.69497e-05
PA14_09970	597.624	0.112185	0.0809963	1.38507	0.166032	0.328832
PA14_09980	6.10263	-0.53731	0.626077	-0.858216	0.390773	0.601018
PA14_09990	1991.79	0.00462586	0.0499059	0.0926917	0.926149	0.963826
PA14_10010	458.055	-0.0681569	0.0940025	-0.725055	0.468418	0.672264
PA14_10020	89.1512	-0.0922712	0.181608	-0.508079	0.611398	0.784307
PA14_10040	1183.39	-0.563521	0.0858708	-6.56242	5.29399e-11	4.16407e-10
PA14_10050	602	0.308762	0.0889863	3.46977	0.000520906	0.00219942
PA14_10070	1463.11	0.0850303	0.0663428	1.28168	0.199955	0.377633
PA14_10080	1288.32	0.208606	0.0611768	3.40989	0.0006499	0.00269597
PA14_10090	312.469	-0.076295	0.100488	-0.759248	0.447704	0.653267
PA14_10110	337.811	0.0358833	0.095016	0.377656	0.705686	0.84623
PA14_10120	375.549	0.120766	0.101852	1.18571	0.235738	0.426762
PA14_10130	275.121	0.479207	0.123303	3.88643	0.00010173	0.000475492
PA14_10140	188.731	0.0522633	0.113555	0.460246	0.64534	0.808424
PA14_10160	107.542	0.00636402	0.151306	0.0420606	0.96645	0.98407
PA14_10170	4.69687	-0.0878478	0.766187	-0.114656	0.908718	0.954712
PA14_10180	300.395	-0.0884466	0.0963542	-0.917931	0.358655	0.570469
PA14_10190	2919.06	-0.0177534	0.058269	-0.304679	0.76061	0.881532
PA14_10200	797.137	0.428899	0.0722531	5.93606	2.91948e-09	2.07506e-08
PA14_10210	680.462	0.419566	0.0901821	4.65243	3.28046e-06	1.80346e-05
PA14_10220	207.669	0.0864771	0.13438	0.643529	0.519881	0.717769
PA14_10230	864.886	0.388793	0.068444	5.68046	1.34329e-08	8.98534e-08
PA14_10240	191.865	0.273055	0.116469	2.34444	0.0190556	0.0583777
PA14_10250	4319.35	0.0769527	0.0711685	1.08127	0.279575	0.481269
PA14_10260	18.4434	0.0614806	0.360779	0.170411	0.864687	0.933018
PA14_10270	941.274	0.0325831	0.0666307	0.48901	0.624835	0.793909
PA14_10280	740.276	0.0209474	0.0670759	0.312293	0.754818	0.877325
PA14_10290	981.96	0.219423	0.0672232	3.2641	0.00109813	0.00439447
PA14_10300	150.862	-1.03634	0.150295	-6.89535	5.3733e-12	4.46779e-11
PA14_10320	97.3829	-0.154447	0.185227	-0.833826	0.404379	0.612882
PA14_10330	659.076	0.0408049	0.0748676	0.545027	0.585735	0.768489
PA14_10340	981.831	1.70625	0.104654	16.3037	9.28186e-60	2.89625e-58
PA14_10350	1144.91	0.532673	0.0760883	7.00072	2.54658e-12	2.15529e-11
PA14_10360	773.944	-0.0212238	0.0837756	-0.253341	0.800004	0.897368
PA14_10370	1130.52	1.00011	0.0737866	13.5541	7.49051e-42	1.58136e-40
PA14_10380	239.45	-0.0324346	0.10781	-0.300851	0.763528	0.882932
PA14_10400	28.9183	-7.40772	1.04782	-7.06966	1.55319e-12	1.3284e-11
PA14_10410	2101.42	-0.0144734	0.0544481	-0.265819	0.790378	0.892431
PA14_10420	153.913	-0.49817	0.137387	-3.62602	0.00028782	0.00126708
PA14_10440	195.495	-0.0539809	0.130721	-0.412948	0.679644	0.830146
PA14_10470	2011.95	0.0998561	0.0720399	1.38612	0.16571	0.328585
PA14_10480	408.677	-0.429569	0.104685	-4.10346	4.0702e-05	0.000198069
PA14_10490	780.296	0.114968	0.0700943	1.64019	0.100965	0.231202
PA14_10500	1870.93	0.0395647	0.0628531	0.629478	0.529036	0.724474
PA14_10530	510.899	0.201782	0.0868336	2.32378	0.0201373	0.0613519
PA14_10540	53.9775	-0.271396	0.500749	-0.541981	0.587832	0.77008
PA14_10550	1475.19	0.0401393	0.0620483	0.646904	0.517694	0.715673
PA14_10560	897.906	0.330992	0.0761838	4.34465	1.39499e-05	7.22826e-05
PA14_10570	422.555	0.433682	0.0968677	4.47705	7.56808e-06	4.01299e-05
PA14_10590	533.277	-0.0311796	0.0790561	-0.394399	0.693287	0.8377
PA14_10600	125.523	0.0918877	0.162725	0.56468	0.572291	0.757762
PA14_10610	635.094	0.738551	0.0843043	8.76054	1.9432e-18	2.19895e-17
PA14_10620	582.092	0.660323	0.0837378	7.88561	3.13e-15	3.05943e-14
PA14_10630	724.08	0.0331717	0.0837665	0.396002	0.692104	0.837158
PA14_10640	120.389	-0.407257	0.155483	-2.6193	0.00881092	0.0293646
PA14_10650	1870.66	0.0399584	0.056375	0.708796	0.478451	0.682082
PA14_10660	344.902	-0.065202	0.099704	-0.653956	0.51314	0.712502
PA14_10680	733.763	-0.260603	0.0656204	-3.97138	7.14588e-05	0.00033931
PA14_10700	173.022	0.136814	0.30475	0.448938	0.653476	0.813577
PA14_10710	367.761	0.0103522	0.0992059	0.10435	0.916891	0.958889
PA14_10730	545.984	0.0710423	0.0967371	0.734385	0.462714	0.66779
PA14_10740	502.579	0.498359	0.0765971	6.50624	7.70571e-11	6.0008e-10
PA14_10750	665.985	-0.105407	0.0778674	-1.35367	0.175842	0.34234
PA14_10770	1019.81	-0.143881	0.0720776	-1.99619	0.045913	0.122527
PA14_10780	1195.78	-0.378822	0.060213	-6.29137	3.14685e-10	2.36389e-09
PA14_10790	113.975	-0.19742	0.171164	-1.15339	0.248749	0.444089
PA14_10800	95.5947	-0.0860114	0.162928	-0.527912	0.597561	0.776911
PA14_10820	1823.8	0.0918183	0.0559943	1.63978	0.101051	0.231305
PA14_10830	191.245	0.0963072	0.120056	0.802188	0.422444	0.630171
PA14_10840	2403.16	-0.332911	0.0521156	-6.38794	1.68138e-10	1.28169e-09
PA14_10850	1521.89	-0.759935	0.0717124	-10.597	3.07731e-26	4.42431e-25
PA14_10870	1560.9	1.49641	0.0584348	25.6081	1.23793e-144	1.35197e-142
PA14_10890	683.792	0.322281	0.123007	2.62002	0.00879246	0.0293202
PA14_10900	591.624	-0.0234568	0.0973242	-0.241017	0.809542	0.901509
PA14_10910	691.466	-0.0774213	0.0849428	-0.911453	0.362057	0.574114
PA14_10920	670.276	0.461214	0.0828833	5.56463	2.62715e-08	1.7268e-07
PA14_10940	664.485	0.217114	0.0764069	2.84155	0.00448954	0.0161368
PA14_10950	1174.26	-0.0496038	0.0636762	-0.779	0.43598	0.642335
PA14_10970	60.4033	0.367164	0.254009	1.44547	0.148325	0.304974
PA14_10990	2905.87	-0.0971322	0.0598825	-1.62205	0.104794	0.236818
PA14_11000	110.947	0.204021	0.189781	1.07503	0.28236	0.483862
PA14_11010	662.452	-0.120423	0.0819716	-1.46908	0.141812	0.296738
PA14_11020	492.604	0.29033	0.0836871	3.46924	0.00052194	0.00220215
PA14_11030	689.466	-0.0218943	0.0810149	-0.270251	0.786967	0.890925
PA14_11050	437.037	0.0798777	0.104771	0.762405	0.445818	0.651686
PA14_11060	89.3144	-0.0869158	0.189953	-0.457565	0.647265	0.809117
PA14_11070	2.08683	0.206347	1.20859	0.170733	0.864433	0.933018
PA14_11080	1625.12	0.421072	0.188382	2.23521	0.0254037	0.0749053
PA14_11090	1283.09	0.198532	0.0650165	3.05356	0.00226142	0.00861342
PA14_11100	371.612	-0.155213	0.0863196	-1.79812	0.0721583	0.176309
PA14_11110	135.08	-0.430131	0.140969	-3.05124	0.002279	0.00867457
PA14_11120	938.714	0.0142814	0.0735904	0.194066	0.846124	0.922201
PA14_11130	1104.81	0.12802	0.0623746	2.05244	0.040127	0.109401
PA14_11140	49.6602	0.364557	0.234191	1.55667	0.119549	0.261324
PA14_11150	2048.58	0.331631	0.0649328	5.10729	3.26812e-07	1.97024e-06
PA14_11160	1424.33	-0.0761025	0.0554315	-1.37291	0.16978	0.333386
PA14_11170	73.628	-0.212828	0.191358	-1.1122	0.266053	0.463755
PA14_11180	1072.09	0.620514	0.0842907	7.36159	1.81727e-13	1.62524e-12
PA14_11190	250.557	0.116228	0.107361	1.08259	0.278991	0.4807
PA14_11210	611.223	-0.0198144	0.071199	-0.278296	0.780785	0.889662
PA14_11230	163.156	-3.72188	0.207005	-17.9797	2.81124e-72	1.07872e-70
PA14_11240	25.8028	0.0184069	0.300007	0.0613549	0.951077	0.975452
PA14_11250	59.4995	-9.18704	1.03772	-8.85309	8.51269e-19	9.86603e-18
PA14_11270	1111.1	0.303668	0.0626867	4.84422	1.27109e-06	7.24021e-06
PA14_11280	446.904	-0.0997577	0.0848626	-1.17552	0.239786	0.431889
PA14_11290	1425.79	-0.00507489	0.107375	-0.0472632	0.962303	0.981405
PA14_11310	44.0816	-0.418682	0.238461	-1.75577	0.0791284	0.19025
PA14_11320	1209.39	0.0969723	0.0666182	1.45564	0.145491	0.301236
PA14_11330	1474.64	-0.150942	0.0577777	-2.61246	0.00898926	0.0299063
PA14_11340	1101.22	0.180303	0.0714882	2.52213	0.0116645	0.0377236
PA14_11350	354.737	-0.0985176	0.090681	-1.08642	0.277294	0.478084
PA14_11370	976.749	0.194533	0.0664222	2.92873	0.00340347	0.0125102
PA14_11380	25.2889	-7.95154	1.05069	-7.56789	3.79334e-14	3.53153e-13
PA14_11400	455.756	-0.536946	0.103949	-5.16547	2.39833e-07	1.4636e-06
PA14_11410	639.043	0.101336	0.0734955	1.3788	0.167956	0.331205
PA14_11420	393.958	-0.273121	0.0966419	-2.82612	0.00471161	0.0167652
PA14_11430	14.0131	-4.10157	0.690249	-5.94216	2.81297e-09	2.00186e-08
PA14_11450	150.336	0.659863	0.14366	4.59323	4.36428e-06	2.36948e-05
PA14_11460	66.8771	-3.37281	0.278825	-12.0965	1.10175e-33	1.90758e-32
PA14_11470	1676.73	0.112983	0.0741457	1.52379	0.12756	0.274399
PA14_11480	386.343	-0.391282	0.108583	-3.60354	0.000313913	0.00137026
PA14_11490	926.981	0.0910611	0.0693933	1.31225	0.189437	0.362848
PA14_11510	15.0146	-6.46833	1.07199	-6.03394	1.60012e-09	1.15759e-08
PA14_11520	696.875	0.061981	0.0819318	0.756495	0.449353	0.654662
PA14_11530	47.7318	-0.346101	0.264799	-1.30703	0.191202	0.364986
PA14_11550	85.2021	1.45891	0.200279	7.2844	3.23108e-13	2.8537e-12
PA14_11560	1273.9	-0.0464285	0.0708963	-0.654879	0.512545	0.712022
PA14_11570	63.3624	-0.793779	0.227568	-3.48809	0.000486477	0.00206944
PA14_11580	1335.51	-3.23122e-05	0.0582896	-0.000554338	0.999558	0.999839
PA14_11590	1170.57	-0.0249495	0.0605042	-0.412361	0.680075	0.830146
PA14_11600	598.16	-0.574929	0.129931	-4.42487	9.65018e-06	5.06033e-05
PA14_11610	285.568	-1.34349	0.118127	-11.3733	5.67807e-30	9.00719e-29
PA14_11620	852.258	0.538676	0.193579	2.78271	0.00539065	0.0189089
PA14_11630	429.47	-0.0703256	0.0930388	-0.755874	0.449725	0.6547
PA14_11650	171.481	-0.363169	0.126782	-2.86451	0.00417653	0.015069
PA14_11660	592.886	-0.106985	0.0877975	-1.21854	0.223019	0.409509
PA14_11670	113.892	-0.0339763	0.156037	-0.217745	0.827628	0.91267
PA14_11680	1476.65	-0.380308	0.0687682	-5.53028	3.19713e-08	2.08696e-07
PA14_11690	983.31	-0.0442593	0.0714687	-0.619282	0.535731	0.72874
PA14_11720	456.738	0.177467	0.0821665	2.15985	0.0307841	0.0877295
PA14_11730	316.812	0.30615	0.0951523	3.21747	0.00129326	0.0051003
PA14_11740	209.776	-0.0290344	0.113745	-0.255258	0.798524	0.896742
PA14_11750	22.7659	0.038546	0.3588	0.10743	0.914448	0.957425
PA14_11760	1417.53	-0.479011	0.0585532	-8.18078	2.82013e-16	2.85482e-15
PA14_11770	1765.43	0.0492983	0.0610244	0.807845	0.41918	0.627419
PA14_11790	1365.1	0.0235016	0.0660123	0.356019	0.721826	0.857584
PA14_11830	1059.56	0.688694	0.0719442	9.57262	1.04235e-21	1.32132e-20
PA14_11845	174.5	-4.03805	0.195705	-20.6334	1.37699e-94	7.3773e-93
PA14_11860	338.573	-0.854845	0.0966434	-8.84535	9.12393e-19	1.05101e-17
PA14_11880	3747.47	0.577452	0.0433107	13.3328	1.49198e-40	3.09231e-39
PA14_11890	895.425	0.118521	0.0781445	1.51669	0.129346	0.277401
PA14_11900	133.211	-0.164404	0.150163	-1.09484	0.273586	0.473287
PA14_11910	1322.54	0.0392276	0.0692467	0.566491	0.57106	0.757015
PA14_11920	685.534	-0.315186	0.077743	-4.0542	5.03065e-05	0.000242522
PA14_11930	1415.93	0.357103	0.0600155	5.95017	2.67858e-09	1.91342e-08
PA14_11940	88.3735	0.00231142	0.192645	0.0119983	0.990427	0.995158
PA14_11960	329.045	-0.309626	0.0990217	-3.12685	0.00176687	0.0068352
PA14_11970	343.291	0.199801	0.0966123	2.06807	0.0386335	0.106041
PA14_11980	180.497	-0.064405	0.140165	-0.459494	0.645879	0.808528
PA14_11990	2229.47	0.056178	0.0493483	1.1384	0.254955	0.450915
PA14_12010	416.099	-3.63211	0.124475	-29.1793	3.54793e-187	6.49959e-185
PA14_12020	455.028	-0.385395	0.102858	-3.74688	0.000179044	0.000809548
PA14_12030	183.583	-0.816386	0.14106	-5.78751	7.14375e-09	4.87613e-08
PA14_12050	263.034	-0.781874	0.106672	-7.32968	2.30697e-13	2.0535e-12
PA14_12060	950.502	-0.948497	0.0893318	-10.6177	2.46585e-26	3.5542e-25
PA14_12070	600.913	0.43572	0.0867022	5.02547	5.02193e-07	2.96153e-06
PA14_12080	240.534	-0.489975	0.107032	-4.57785	4.69771e-06	2.53837e-05
PA14_12090	1.25196	-1.88181	1.51486	-1.24224	0.214148	0.397304
PA14_12110	26.8605	-7.31248	1.06024	-6.89697	5.31217e-12	4.42344e-11
PA14_12120	893.821	0.0286028	0.0685989	0.416957	0.67671	0.828419
PA14_12130	1086.91	-0.21319	0.0674686	-3.15983	0.00157859	0.00613607
PA14_12140	146.909	-0.785313	0.139275	-5.63857	1.71471e-08	1.14026e-07
PA14_12160	656.777	0.217189	0.0800635	2.71271	0.00667354	0.0229274
PA14_12170	471.98	0.101284	0.100098	1.01186	0.311607	0.518844
PA14_12180	1242.72	-0.0354277	0.0700432	-0.505798	0.612998	0.785415
PA14_12200	464.147	-1.45812	0.0842724	-17.3024	4.50929e-67	1.55202e-65
PA14_12210	423.058	-1.75039	0.097417	-17.9681	3.46656e-72	1.32125e-70
PA14_12230	0.934746	-3.179	1.81922	-1.74745	0.0805596	0.193099
PA14_12260	1037.65	0.104176	0.0680039	1.53191	0.125545	0.271468
PA14_12270	500.575	0.174802	0.0839768	2.08156	0.037383	0.103208
PA14_12280	405.869	-1.36228	0.0997767	-13.6532	1.93082e-42	4.09146e-41
PA14_12300	5706.23	0.0434972	0.050719	0.857612	0.391107	0.601108
PA14_12310	1751.74	-0.107376	0.0551642	-1.94648	0.051597	0.134721
PA14_12330	1266.66	1.25674	0.0799188	15.7252	1.0161e-55	2.89972e-54
PA14_12350	353.006	0.231404	0.100037	2.31317	0.0207131	0.0627692
PA14_12360	127.479	-0.208952	0.141697	-1.47463	0.140311	0.294357
PA14_12370	16.5252	0.829877	0.400372	2.07277	0.0381939	0.10514
PA14_12390	33.8581	-6.94219	0.978258	-7.09648	1.27971e-12	1.10113e-11
PA14_12400	46.9499	-1.05204	0.257953	-4.07841	4.53447e-05	0.000220096
PA14_12410	164.254	-7.2736	0.521279	-13.9534	3.00121e-44	6.63185e-43
PA14_12430	12294.8	0.122465	0.0490613	2.49616	0.0125546	0.0403725
PA14_12440	2772.06	0.935164	0.0480426	19.4653	2.16252e-84	1.03201e-82
PA14_12450	416.883	0.174871	0.0833801	2.09728	0.0359687	0.10018
PA14_12470	2201.84	-0.0102329	0.0511628	-0.200006	0.841476	0.919696
PA14_12490	709.402	-0.128421	0.0773992	-1.65921	0.0970743	0.224191
PA14_12530	10297.3	-0.136291	0.0624317	-2.18304	0.0290332	0.0837377
PA14_12540	43.8193	-0.556418	0.254476	-2.18653	0.0287771	0.0833342
PA14_12550	971.527	-0.214763	0.0755936	-2.84102	0.00449694	0.0161531
PA14_12560	2275.34	-0.0814992	0.0554847	-1.46886	0.141871	0.296753
PA14_12570	3742.62	0.475618	0.0534063	8.90564	5.30774e-19	6.16414e-18
PA14_12590	930.394	0.303027	0.0723877	4.18616	2.83708e-05	0.00014055
PA14_12620	3013.38	-0.0439844	0.0516841	-0.851024	0.394756	0.604753
PA14_12640	139.638	-0.654754	0.153974	-4.25238	2.11511e-05	0.000106581
PA14_12650	27.5424	-0.229972	0.333927	-0.688687	0.49102	0.692624
PA14_12670	160.978	0.0998767	0.136627	0.731018	0.464768	0.669107
PA14_12680	724.454	-0.12744	0.0707515	-1.80123	0.0716659	0.175223
PA14_12690	231.827	-0.0843172	0.117269	-0.719008	0.472136	0.675721
PA14_12700	276.304	0.0279252	0.113026	0.247069	0.804855	0.900221
PA14_12710	736.228	0.0519559	0.0669376	0.776184	0.437641	0.643876
PA14_12730	440.435	-0.201984	0.0872238	-2.31569	0.0205751	0.0624514
PA14_12750	728.742	-0.148483	0.0789005	-1.8819	0.0598501	0.151062
PA14_12760	373.542	-0.0148388	0.103582	-0.143257	0.886087	0.943045
PA14_12770	492.608	0.013255	0.0789692	0.16785	0.866701	0.933911
PA14_12780	47.5228	0.0322319	0.246208	0.130913	0.895844	0.948738
PA14_12810	14581.5	-0.0528282	0.03693	-1.43049	0.152575	0.310796
PA14_12820	493.852	0.0203893	0.083908	0.242996	0.808009	0.900819
PA14_12840	1736.24	0.0501998	0.0532373	0.942944	0.345709	0.556328
PA14_12850	2.91797	-0.399435	0.903035	-0.442325	0.658254	0.81585
PA14_12860	121.278	-3.16036	0.213578	-14.7972	1.52754e-49	3.78815e-48
PA14_12870	3785.91	0.137212	0.0529532	2.5912	0.00956415	0.0315784
PA14_12890	576.757	0.181675	0.0773515	2.3487	0.0188392	0.0577689
PA14_12900	1030.32	-0.0186508	0.0682532	-0.273258	0.784655	0.890142
PA14_12910	27.7542	-0.21351	0.36343	-0.587486	0.556877	0.745874
PA14_12920	2613.42	-0.0597371	0.080781	-0.739494	0.459607	0.664488
PA14_12940	747.735	0.202943	0.104201	1.94762	0.0514605	0.134427
PA14_12960	661.491	-0.0718758	0.078937	-0.910546	0.362535	0.574612
PA14_12970	1389.12	-0.214503	0.0635527	-3.37521	0.000737601	0.00302225
PA14_12980	233.039	0.00747048	0.117514	0.0635711	0.949312	0.975379
PA14_12990	345.007	-0.158214	0.11364	-1.39223	0.163851	0.325985
PA14_13000	182.941	0.188501	0.128209	1.47027	0.14149	0.296292
PA14_13010	432.1	0.0904632	0.081055	1.11607	0.264391	0.461284
PA14_13030	93.7222	0.997348	0.195378	5.1047	3.31324e-07	1.99321e-06
PA14_13040	329.418	0.104548	0.0891849	1.17226	0.241094	0.433419
PA14_13050	522.645	0.0630686	0.0805084	0.783379	0.433405	0.640794
PA14_13060	2013.97	-0.0981379	0.0679832	-1.44356	0.148863	0.305646
PA14_13070	205.769	0.0320046	0.123804	0.258511	0.796013	0.895692
PA14_13090	293.682	0.0997203	0.112523	0.886221	0.375498	0.58713
PA14_13110	481.038	0.444923	0.0843615	5.27401	1.33478e-07	8.33905e-07
PA14_13130	1290.17	-0.0295583	0.0630106	-0.4691	0.638998	0.80318
PA14_13140	383.149	-1.19838	0.0861713	-13.9069	5.74942e-44	1.26065e-42
PA14_13150	423.857	0.0289605	0.0872634	0.331874	0.739984	0.868797
PA14_13170	1359.8	0.0301287	0.0534105	0.564097	0.572688	0.758097
PA14_13200	80.9957	-0.25913	0.189723	-1.36583	0.171991	0.336574
PA14_13210	1753.51	0.175466	0.0543763	3.22688	0.00125149	0.00495275
PA14_13220	967.193	-0.100777	0.071856	-1.40248	0.160772	0.321374
PA14_13230	351.086	-0.165797	0.108975	-1.52142	0.128154	0.275469
PA14_13240	730.726	-0.0466951	0.0708435	-0.659131	0.509812	0.709265
PA14_13250	2012.98	1.18153	0.0525835	22.4697	8.21424e-112	5.9806e-110
PA14_13260	58.2363	-0.12045	0.218216	-0.551974	0.580966	0.765322
PA14_13280	375.415	-0.0398107	0.112883	-0.352671	0.724335	0.859147
PA14_13290	41.1681	-0.142458	0.236148	-0.60326	0.546336	0.736619
PA14_13300	648.906	-0.0599362	0.0869056	-0.689669	0.490402	0.692239
PA14_13320	1764.08	0.0663728	0.0807793	0.821656	0.411273	0.618707
PA14_13330	1415.68	0.773459	0.0705066	10.97	5.32599e-28	8.13073e-27
PA14_13340	412.366	-0.0228099	0.106754	-0.213669	0.830805	0.914901
PA14_13350	400.029	-1.4075	0.0930743	-15.1223	1.15399e-51	2.96538e-50
PA14_13360	636.215	-0.75962	0.0883617	-8.59672	8.20286e-18	8.94127e-17
PA14_13370	1962.96	0.180498	0.0603294	2.99187	0.00277276	0.0104282
PA14_13380	13.8454	0.16885	0.456788	0.369646	0.711646	0.849497
PA14_13390	282.203	-0.115796	0.0960415	-1.20568	0.227939	0.415693
PA14_13410	238.352	0.227096	0.103119	2.20227	0.0276463	0.0806387
PA14_13420	916.048	-0.240389	0.0632493	-3.80066	0.000144313	0.000659868
PA14_13430	876.32	1.20189	0.0695317	17.2855	6.05037e-67	2.06988e-65
PA14_13450	791.837	0.452734	0.0780045	5.80395	6.47723e-09	4.44253e-08
PA14_13460	51.2982	0.188046	0.216048	0.870391	0.384087	0.595486
PA14_13470	1223.61	0.0609179	0.0813403	0.748926	0.453902	0.659376
PA14_13490	863.668	0.115457	0.0856388	1.34819	0.177597	0.344694
PA14_13500	895.758	-0.0596457	0.0693229	-0.860404	0.389566	0.600414
PA14_13510	1007.26	0.0363371	0.0729436	0.498154	0.618376	0.788627
PA14_13520	494.712	0.11631	0.107637	1.08058	0.279885	0.481355
PA14_13530	660.069	0.183866	0.0763177	2.40921	0.0159869	0.0500494
PA14_13560	747.512	0.141654	0.0740523	1.91289	0.0557623	0.142839
PA14_13580	1224.37	-0.197136	0.0813096	-2.42451	0.0153292	0.0481762
PA14_13590	1022.57	-0.015468	0.0644282	-0.240082	0.810267	0.901726
PA14_13600	291.921	-0.00680246	0.0980564	-0.0693729	0.944693	0.97429
PA14_13610	494.886	-2.85635	0.103125	-27.6979	7.40975e-169	1.052e-166
PA14_13620	267.529	0.037773	0.119628	0.315754	0.752189	0.875524
PA14_13630	351.762	0.321523	0.100504	3.19912	0.00137849	0.00540264
PA14_13650	125.697	-0.0847431	0.145952	-0.580622	0.561495	0.749627
PA14_13660	26.243	-0.102239	0.306025	-0.334086	0.738315	0.868412
PA14_13670	73.491	-0.0685962	0.207564	-0.330482	0.741036	0.869133
PA14_13680	303.827	0.373605	0.0950101	3.93226	8.41494e-05	0.000396914
PA14_13690	908.457	-0.0531034	0.071731	-0.740313	0.45911	0.663938
PA14_13710	1017.81	-0.0563566	0.066299	-0.850036	0.395305	0.605267
PA14_13720	311.432	-0.185262	0.101828	-1.81936	0.0688561	0.169425
PA14_13730	2.93222	2.40845	1.05517	2.28252	0.0224589	0.0673412
PA14_13740	1297.56	0.0307552	0.0538644	0.570974	0.568017	0.754919
PA14_13750	1.5584	0.605216	1.32712	0.456038	0.648363	0.809954
PA14_13770	1816.55	0.00470046	0.0585366	0.0802996	0.935999	0.968928
PA14_13780	190.924	-0.134352	0.124799	-1.07655	0.281682	0.483577
PA14_13800	102.838	-0.0442151	0.156499	-0.282526	0.77754	0.888997
PA14_13810	197.421	-0.133555	0.132602	-1.00719	0.313844	0.520538
PA14_13830	159.187	-0.330616	0.138491	-2.38728	0.0169738	0.0526743
PA14_13840	2492.54	-0.0329427	0.0570864	-0.577066	0.563895	0.75208
PA14_13850	435.818	0.104713	0.0794508	1.31795	0.187519	0.360746
PA14_13860	332.857	0.0627904	0.100892	0.62235	0.533712	0.727021
PA14_13870	1337.29	-0.101895	0.0817813	-1.24594	0.212786	0.395552
PA14_13880	353.274	0.171706	0.100291	1.71209	0.0868807	0.204644
PA14_13890	625.621	-0.0347236	0.093177	-0.372662	0.7094	0.848178
PA14_13900	1139.43	0.00546364	0.0751758	0.0726782	0.942062	0.972722
PA14_13910	992.393	-0.093986	0.0750923	-1.25161	0.210714	0.39247
PA14_13920	471.379	0.0995559	0.0807563	1.23279	0.217653	0.402491
PA14_13940	2396.62	-0.0201165	0.0535984	-0.375319	0.707424	0.847116
PA14_13950	1136.7	-0.0444481	0.0584792	-0.760066	0.447215	0.653095
PA14_13960	544.145	-0.0532372	0.0782972	-0.679937	0.496545	0.697845
PA14_13970	3170.96	0.091622	0.0560644	1.63423	0.102211	0.232927
PA14_13990	1024.36	0.336536	0.0604252	5.56947	2.5551e-08	1.68335e-07
PA14_14000	3224.93	-0.194357	0.0477418	-4.07101	4.68098e-05	0.000226433
PA14_14010	403.229	-0.039857	0.0841634	-0.473567	0.635809	0.801322
PA14_14020	140.944	-0.923898	0.152528	-6.05725	1.38467e-09	1.00685e-08
PA14_14040	896.84	-0.091467	0.0625732	-1.46176	0.143807	0.29904
PA14_14060	1245.33	-0.0717258	0.0655264	-1.09461	0.273688	0.473287
PA14_14080	618.082	0.585209	0.0785991	7.44549	9.65867e-14	8.76223e-13
PA14_14100	251.167	-0.184774	0.105944	-1.74408	0.0811459	0.193882
PA14_14130	910.821	-0.0777866	0.0641659	-1.21227	0.225408	0.412401
PA14_14140	80.9645	1.07262	0.174491	6.14712	7.89017e-10	5.82682e-09
PA14_14150	468.674	0.133518	0.0917263	1.45561	0.145499	0.301236
PA14_14160	749.951	0.178578	0.0826949	2.15948	0.0308126	0.0877295
PA14_14170	329.132	0.203901	0.0952925	2.13974	0.0323754	0.0916094
PA14_14210	134.944	0.235536	0.154069	1.52877	0.126322	0.272287
PA14_14220	566.744	0.465621	0.0858096	5.42622	5.75614e-08	3.69369e-07
PA14_14230	46.1297	-0.907864	0.259288	-3.50138	0.000462861	0.00197787
PA14_14250	255.64	-0.0310613	0.109484	-0.283706	0.776635	0.888454
PA14_14270	280.215	-0.138199	0.0979138	-1.41143	0.158117	0.318271
PA14_14280	30.1992	-0.333394	0.287981	-1.1577	0.246988	0.441638
PA14_14290	849.43	0.144241	0.0691179	2.08688	0.0368989	0.102174
PA14_14300	1944.42	0.00148799	0.0546209	0.0272422	0.978267	0.99013
PA14_14310	683.636	0.271235	0.0945303	2.86929	0.00411397	0.0148621
PA14_14320	35.9412	0.182708	0.271951	0.671843	0.501684	0.702951
PA14_14330	58.266	0.198214	0.200915	0.986552	0.323862	0.531747
PA14_14340	830.675	-0.00917515	0.0702687	-0.130572	0.896114	0.948738
PA14_14360	179.597	0.0528886	0.121025	0.437006	0.662107	0.819017
PA14_14370	1153.67	0.00202185	0.0673582	0.0300164	0.976054	0.98948
PA14_14380	1620.06	0.10719	0.0641465	1.67101	0.094719	0.220004
PA14_14390	201.343	0.0567052	0.115979	0.488927	0.624894	0.793909
PA14_14420	771.4	0.113239	0.0715616	1.5824	0.113558	0.251715
PA14_14430	286.078	-0.394476	0.274443	-1.43737	0.150614	0.308266
PA14_14440	425.211	1.33493	0.0846468	15.7706	4.95682e-56	1.43621e-54
PA14_14450	891.967	-0.0306914	0.0683635	-0.448944	0.653472	0.813577
PA14_14460	797.994	0.0297871	0.0721859	0.412645	0.679867	0.830146
PA14_14470	1087.64	-0.0826227	0.0679923	-1.21518	0.224299	0.411215
PA14_14480	1651.89	0.00588586	0.0521897	0.112778	0.910206	0.955818
PA14_14490	497.035	0.00115145	0.0901824	0.012768	0.989813	0.994998
PA14_14500	0.87478	-3.10598	1.68355	-1.8449	0.0650515	0.162243
PA14_14510	390.556	-0.287817	0.0945357	-3.04453	0.00233042	0.00886432
PA14_14520	335.37	-0.615662	0.0956183	-6.43875	1.20462e-10	9.25717e-10
PA14_14530	1021.4	-0.10458	0.0678887	-1.54047	0.123447	0.267884
PA14_14540	1421.68	-0.030032	0.0616538	-0.487107	0.626182	0.794593
PA14_14550	287.668	0.738392	0.140475	5.25641	1.46898e-07	9.11729e-07
PA14_14560	504.887	0.196341	0.0845395	2.32247	0.0202074	0.0615324
PA14_14570	394.932	-1.89549	0.102259	-18.5362	1.05479e-76	4.50389e-75
PA14_14590	199.769	-0.246536	0.121533	-2.02855	0.0425038	0.114989
PA14_14600	186.198	-0.626307	0.127103	-4.92756	8.32613e-07	4.85463e-06
PA14_14610	139.326	-0.775485	0.175432	-4.42043	9.85068e-06	5.1512e-05
PA14_14630	753.458	-2.92867	0.0863464	-33.9177	3.65376e-252	1.03749e-249
PA14_14650	590.325	0.29469	0.0802725	3.67112	0.000241494	0.0010748
PA14_14660	933.332	-0.165362	0.0747455	-2.21233	0.0269436	0.0789132
PA14_14680	69.3914	-3.15706	0.281684	-11.2078	3.73348e-29	5.84088e-28
PA14_14690	938.627	0.203176	0.0826797	2.45739	0.0139952	0.0444755
PA14_14700	442.583	-0.0720909	0.0892574	-0.807674	0.419278	0.627419
PA14_14710	162.096	-1.6228	0.150576	-10.7773	4.40689e-27	6.51738e-26
PA14_14730	48.6055	-7.46236	0.971529	-7.68105	1.57795e-14	1.49353e-13
PA14_14740	0.10329	-0.412941	3.53381	-0.116854	0.906976	0.953752
PA14_14750	238.449	-0.0449866	0.134698	-0.333981	0.738394	0.868412
PA14_14770	1106.47	0.0315349	0.0613864	0.513712	0.607453	0.782116
PA14_14780	215.267	-0.0204533	0.145767	-0.140316	0.888411	0.944633
PA14_14800	467.513	-0.14935	0.0937578	-1.59293	0.111175	0.24769
PA14_14810	1997.99	0.0686343	0.052088	1.31766	0.187618	0.360814
PA14_14820	14.8931	-1.72354	0.454768	-3.78992	0.000150695	0.000687941
PA14_14830	271.715	-0.427368	0.126463	-3.37938	0.00072649	0.00298102
PA14_14850	172.822	-2.36487	0.179247	-13.1934	9.58264e-40	1.95053e-38
PA14_14860	3.18882	-4.96955	1.25134	-3.97139	7.14537e-05	0.00033931
PA14_14880	239.908	-2.94747	0.141559	-20.8215	2.76234e-96	1.58458e-94
PA14_14890	1262.66	-0.0454219	0.0562149	-0.808005	0.419088	0.627419
PA14_14930	385.856	1.70292	0.0957552	17.7841	9.38252e-71	3.48257e-69
PA14_14940	123.54	0.551097	0.159231	3.46099	0.000538201	0.00226907
PA14_14960	1109.65	-0.240366	0.0705001	-3.40944	0.000650955	0.00269838
PA14_14975	1346.4	-0.391188	0.057969	-6.74824	1.49653e-11	1.21525e-10
PA14_14990	988.093	0.0243469	0.238521	0.102075	0.918697	0.959059
PA14_15000	993.57	0.202129	0.0705313	2.86581	0.00415944	0.0150168
PA14_15020	1432.27	0.0540068	0.0588156	0.91824	0.358493	0.570435
PA14_15030	1730.06	0.00989371	0.0629829	0.157086	0.875177	0.937584
PA14_15050	136.118	0.105317	0.143911	0.731821	0.464278	0.669107
PA14_15070	199.783	0.556034	0.112434	4.94542	7.59795e-07	4.44375e-06
PA14_15080	1046.81	0.0968446	0.0604272	1.60267	0.109008	0.244301
PA14_15090	249.863	-3.1547	0.143937	-21.9173	1.77844e-106	1.21684e-104
PA14_15100	625.805	0.0573731	0.0778911	0.736581	0.461377	0.666199
PA14_15110	132.119	-0.377829	0.144777	-2.60973	0.00906135	0.0301108
PA14_15120	147.138	0.198175	0.132272	1.49824	0.13407	0.284842
PA14_15130	108.179	0.0646334	0.161393	0.400473	0.688808	0.83602
PA14_15140	243.091	-0.179827	0.162248	-1.10834	0.267713	0.465934
PA14_15150	1347.63	0.0685558	0.0599186	1.14415	0.252562	0.448627
PA14_15160	129.212	-0.10354	0.175599	-0.589641	0.555431	0.744288
PA14_15180	33.7994	0.0144971	0.271443	0.0534074	0.957407	0.979242
PA14_15190	0.320048	0.946676	2.84222	0.333077	0.739076	0.868412
PA14_15200	315.52	0.127625	0.106053	1.20341	0.228818	0.416894
PA14_15210	2475.37	0.302408	0.0944289	3.20249	0.00136245	0.00535086
PA14_15230	269.845	0.0320683	0.0972149	0.32987	0.741498	0.869316
PA14_15240	1245.19	0.0919283	0.0560206	1.64097	0.100803	0.230969
PA14_15250	4848.21	0.0357701	0.0453343	0.78903	0.430095	0.637231
PA14_15260	90.5034	0.218735	0.162732	1.34414	0.178904	0.346638
PA14_15270	291.06	-0.1566	0.0991415	-1.57956	0.114207	0.252465
PA14_15280	1535.51	-0.0609939	0.0781759	-0.780213	0.435265	0.641711
PA14_15290	131.016	-0.0519913	0.144871	-0.35888	0.719685	0.856294
PA14_15310	29.9496	-3.32318	0.416058	-7.9873	1.37931e-15	1.36228e-14
PA14_15340	80.8978	-1.85075	0.195874	-9.44865	3.43237e-21	4.27465e-20
PA14_15350	62.8965	-0.0982874	0.257211	-0.382127	0.702367	0.84443
PA14_15360	705.664	0.282607	0.0766799	3.68555	0.000228211	0.00102128
PA14_15370	933.546	-0.135012	0.0855235	-1.57866	0.114415	0.252826
PA14_15380	585.095	0.629681	0.104286	6.03799	1.56047e-09	1.13035e-08
PA14_15400	1433.43	0.0198673	0.0597129	0.332713	0.739351	0.868412
PA14_15410	1739.64	0.102869	0.0719596	1.42954	0.152849	0.310796
PA14_15420	37.6324	0.101724	0.261582	0.388881	0.697364	0.841117
PA14_15430	1044.89	-0.00969448	0.0642595	-0.150865	0.880083	0.940646
PA14_15435	211.058	0.167036	0.11868	1.40746	0.159292	0.319314
PA14_15445	1063.55	0.15532	0.0783689	1.9819	0.0474899	0.125615
PA14_15450	2048.86	0.485637	0.0719818	6.74666	1.51287e-11	1.22562e-10
PA14_15460	3747.16	0.254994	0.0527309	4.83577	1.32632e-06	7.53973e-06
PA14_15470	17.2394	-1.02664	0.400983	-2.5603	0.0104581	0.034271
PA14_15475	437.66	0.0168975	0.0931276	0.181444	0.856019	0.928089
PA14_15480	98.7473	-0.188981	0.168108	-1.12417	0.260943	0.457658
PA14_15490	998.855	0.510348	0.0617423	8.26577	1.38799e-16	1.43056e-15
PA14_15500	2110.25	0.0869365	0.0514234	1.6906	0.090913	0.21273
PA14_15510	252.548	1.46779	0.125835	11.6644	1.93748e-31	3.14369e-30
PA14_15520	621.848	0.0334616	0.0853232	0.392175	0.694929	0.838957
PA14_15530	632.97	0.208657	0.103008	2.02564	0.0428012	0.115527
PA14_15540	303.185	-0.18636	0.0959177	-1.94292	0.0520258	0.135577
PA14_15560	2774.74	0.0896624	0.0615285	1.45725	0.145048	0.300807
PA14_15570	7259.44	-0.177193	0.0509126	-3.48033	0.000500789	0.00212237
PA14_15580	273.15	-0.725039	0.102854	-7.04921	1.79939e-12	1.53434e-11
PA14_15590	6611.5	0.332437	0.051582	6.44482	1.15741e-10	8.91849e-10
PA14_15600	96.0736	-6.67373	0.561683	-11.8817	1.474e-32	2.47658e-31
PA14_15610	2676.41	-0.141181	0.0551982	-2.55771	0.0105364	0.0344479
PA14_15620	1466.23	-0.107836	0.0629007	-1.71439	0.086457	0.203815
PA14_15630	27.4277	-1.8921	0.340171	-5.5622	2.664e-08	1.749e-07
PA14_15650	890.904	0.380793	0.0633478	6.01114	1.84221e-09	1.32934e-08
PA14_15660	258.33	0.127913	0.12501	1.02322	0.306202	0.512201
PA14_15670	475.204	-2.49699	0.0954569	-26.1583	7.93484e-151	9.79608e-149
PA14_15680	347.774	-0.455214	0.0970441	-4.69079	2.72149e-06	1.5049e-05
PA14_15700	1003.06	0.0319629	0.0744667	0.429224	0.66776	0.82294
PA14_15710	658.018	0.00523576	0.0816378	0.0641341	0.948863	0.975311
PA14_15720	273.938	0.0236625	0.0982062	0.240947	0.809596	0.901509
PA14_15750	86.0837	-0.479693	0.170526	-2.81302	0.00490784	0.0173331
PA14_15770	493.222	0.087085	0.104402	0.83413	0.404208	0.612786
PA14_15780	462.805	-0.243892	0.0860636	-2.83386	0.00459894	0.0164778
PA14_15790	13.7638	0.0659121	0.49433	0.133336	0.893928	0.94766
PA14_15810	1016.62	-0.0851404	0.0692065	-1.23024	0.218609	0.40347
PA14_15820	16.8499	-0.124877	0.414963	-0.300936	0.763464	0.882932
PA14_15830	1338.08	0.426724	0.0588584	7.25001	4.16739e-13	3.66356e-12
PA14_15840	209.837	0.0808104	0.118323	0.682963	0.494631	0.695988
PA14_15850	34.5295	-0.233899	0.295246	-0.792218	0.428234	0.635469
PA14_15860	524.296	-0.0436579	0.0839872	-0.519816	0.603192	0.780364
PA14_15870	138.748	-0.324145	0.147436	-2.19855	0.0279102	0.0812415
PA14_15880	48.2889	-1.63469	0.240229	-6.80471	1.01251e-11	8.32136e-11
PA14_15890	281.035	-6.72254	0.335855	-20.0162	3.97947e-89	2.03598e-87
PA14_15910	1823.13	-0.0596936	0.0556119	-1.0734	0.283093	0.484085
PA14_15920	468.155	0.20102	0.0807728	2.4887	0.012821	0.0411127
PA14_15930	202.532	-0.109473	0.133181	-0.821984	0.411086	0.61859
PA14_15960	73.2562	-1.70955	0.206378	-8.28358	1.19532e-16	1.23647e-15
PA14_15970	128.93	0.0265621	0.140755	0.188711	0.850319	0.924856
PA14_15980	179.975	-7.08772	0.471476	-15.0331	4.45979e-51	1.14086e-49
PA14_15990	436.004	1.34624	0.0937616	14.3581	9.47247e-47	2.24142e-45
PA14_16000	140.734	-0.865951	0.149357	-5.79786	6.71652e-09	4.6011e-08
PA14_16010	2567.94	0.624458	0.159737	3.90928	9.25707e-05	0.000434112
PA14_16020	37.0843	-0.0774496	0.297666	-0.26019	0.794717	0.895001
PA14_16030	28.1332	-0.26953	0.307732	-0.87586	0.381106	0.593284
PA14_16040	362.432	-1.1274	0.102894	-10.9569	6.15618e-28	9.34785e-27
PA14_16050	359.483	0.462606	0.101362	4.56392	5.02069e-06	2.70774e-05
PA14_16070	1744.09	-0.00468457	0.0536269	-0.0873548	0.930389	0.966371
PA14_16090	247.772	-0.362935	0.120356	-3.01552	0.00256538	0.00969313
PA14_16100	577.548	0.614525	0.0749589	8.19816	2.44087e-16	2.4753e-15
PA14_16110	4327.44	0.0972729	0.0534592	1.81957	0.0688241	0.16942
PA14_16130	729.538	0.0247795	0.0703256	0.352353	0.724573	0.859147
PA14_16140	424.643	0.0146718	0.0973385	0.15073	0.880189	0.940646
PA14_16150	2995.72	0.0237654	0.059703	0.398061	0.690585	0.836926
PA14_16160	117.845	-0.142459	0.178907	-0.796274	0.425873	0.633455
PA14_16180	291.068	0.101385	0.0986824	1.02739	0.304237	0.509814
PA14_16190	427.488	-0.0397874	0.0966119	-0.411827	0.680466	0.830154
PA14_16200	1889.51	1.72574	0.0708077	24.3723	3.36762e-131	3.18745e-129
PA14_16210	720.274	-0.0294386	0.0775666	-0.379526	0.704297	0.845782
PA14_16220	56.771	0.0968133	0.214236	0.4519	0.651341	0.811889
PA14_16250	1120.11	0.104994	0.069535	1.50994	0.131059	0.280016
PA14_16260	154.057	-0.290492	0.305836	-0.94983	0.342199	0.55193
PA14_16270	151.536	-0.0146223	0.142371	-0.102706	0.918197	0.958889
PA14_16280	85.093	0.868109	0.179954	4.82405	1.4067e-06	7.9727e-06
PA14_16290	1412.64	-0.101588	0.0703721	-1.44358	0.148856	0.305646
PA14_16300	1054.02	0.205608	0.0677714	3.03385	0.00241452	0.0091536
PA14_16310	714.965	0.276102	0.0784561	3.51919	0.000432865	0.00185388
PA14_16320	681.264	-0.0947683	0.0815148	-1.16259	0.244996	0.438906
PA14_16330	857.202	0.00822234	0.0825668	0.0995841	0.920675	0.96059
PA14_16350	280.157	-0.0748845	0.100134	-0.747842	0.454556	0.659376
PA14_16360	684.883	-0.266334	0.079585	-3.34653	0.00081829	0.00333123
PA14_16370	1171.24	-0.113872	0.0694785	-1.63895	0.101223	0.231434
PA14_16380	789.494	0.154344	0.102678	1.50318	0.132792	0.282762
PA14_16390	433.863	0.055376	0.0871619	0.635323	0.525218	0.721616
PA14_16410	688.219	0.249734	0.0777835	3.21062	0.00132447	0.0052089
PA14_16430	698.459	0.161007	0.0790243	2.03744	0.0416061	0.112891
PA14_16440	214.514	0.952563	0.127125	7.49314	6.72458e-14	6.18945e-13
PA14_16450	904.595	-0.00261117	0.0857002	-0.0304686	0.975693	0.989458
PA14_16460	33.1606	-0.392902	0.265849	-1.47792	0.13943	0.29316
PA14_16470	918.49	0.0894396	0.0734469	1.21774	0.223321	0.409903
PA14_16480	3247.31	0.356189	0.0515034	6.91584	4.65109e-12	3.88434e-11
PA14_16500	686.788	0.441661	0.0699533	6.31365	2.72528e-10	2.06358e-09
PA14_16510	225.262	-1.98155	0.119816	-16.5383	1.94537e-61	6.27712e-60
PA14_16530	5.37811	-5.70855	1.17741	-4.8484	1.24464e-06	7.10382e-06
PA14_16550	1225.45	-0.0240898	0.0753236	-0.319818	0.749106	0.872472
PA14_16560	3498.31	0.0626007	0.0482305	1.29795	0.194305	0.369544
PA14_16580	1485.95	0.0990507	0.0531163	1.86479	0.0622109	0.156118
PA14_16590	113.596	-0.0447371	0.152786	-0.29281	0.769668	0.886062
PA14_16600	268.045	-0.0735556	0.101767	-0.722786	0.469812	0.673439
PA14_16610	824.579	0.0662435	0.0696802	0.95068	0.341767	0.55139
PA14_16620	2386.22	0.590164	0.0515917	11.4391	2.66532e-30	4.26376e-29
PA14_16630	859.223	-0.596342	0.0663535	-8.98735	2.53272e-19	2.95953e-18
PA14_16640	125.504	0.0256742	0.151038	0.169985	0.865022	0.933018
PA14_16660	512.418	-0.0065518	0.080107	-0.0817881	0.934815	0.968232
PA14_16670	864.467	-0.0639444	0.0694414	-0.920841	0.357134	0.568909
PA14_16680	1529.36	0.00580009	0.0678384	0.0854987	0.931865	0.966572
PA14_16690	1781.36	0.0315892	0.0606959	0.520451	0.60275	0.780238
PA14_16700	4.72265	-5.54372	1.20058	-4.61753	3.88341e-06	2.11853e-05
PA14_16710	86.5119	-5.0597	0.362309	-13.9651	2.54394e-44	5.64337e-43
PA14_16720	731.986	0.0672934	0.0889541	0.756496	0.449352	0.654662
PA14_16730	24.5348	-0.32174	0.3316	-0.970266	0.331914	0.539479
PA14_16740	161.45	-0.058576	0.146069	-0.401017	0.688408	0.83602
PA14_16750	206.295	-0.624392	0.130133	-4.79812	1.60165e-06	9.03252e-06
PA14_16770	39.9298	-0.228484	0.280038	-0.815905	0.414555	0.622325
PA14_16780	2272.82	0.0657385	0.0521522	1.26051	0.207484	0.388622
PA14_16790	13075.8	0.0816342	0.0473172	1.72526	0.0844815	0.200071
PA14_16800	208.445	-2.23999	0.129144	-17.3449	2.15556e-67	7.46427e-66
PA14_16820	696.9	0.703173	0.0667145	10.54	5.64721e-26	8.01762e-25
PA14_16830	1844.72	0.0810603	0.0671119	1.20784	0.22711	0.414979
PA14_16840	116.487	0.130089	0.155004	0.839262	0.401322	0.610367
PA14_16860	405.187	0.116876	0.0928876	1.25825	0.208301	0.389382
PA14_16870	103.581	-0.314084	0.170646	-1.84056	0.0656865	0.163611
PA14_16880	1301.39	0.16948	0.0571526	2.9654	0.00302288	0.0112423
PA14_16890	1175.88	-0.301251	0.0702928	-4.28566	1.822e-05	9.27996e-05
PA14_16910	802.345	-0.185351	0.0954155	-1.94256	0.0520688	0.135577
PA14_16930	212.334	0.188486	0.123212	1.52977	0.126073	0.272025
PA14_16950	1475.76	0.0370082	0.0663515	0.55776	0.577008	0.762054
PA14_16960	18.3796	-0.932325	0.404567	-2.3045	0.0211945	0.0639552
PA14_16970	1745.39	-0.301849	0.0539714	-5.59276	2.23488e-08	1.48096e-07
PA14_16980	419.715	0.136605	0.0885867	1.54205	0.12306	0.267353
PA14_16990	1339.97	0.104417	0.0721506	1.44721	0.147839	0.304416
PA14_17000	965.127	0.448813	0.0681521	6.58546	4.53491e-11	3.57195e-10
PA14_17010	692.849	-0.217176	0.109214	-1.98853	0.0467527	0.124244
PA14_17030	104.019	0.187783	0.176563	1.06355	0.287534	0.489334
PA14_17040	210.237	-0.133958	0.135789	-0.986517	0.32388	0.531747
PA14_17050	483.78	-0.764891	0.104393	-7.32701	2.35342e-13	2.09156e-12
PA14_17060	386.059	-0.271655	0.0934362	-2.90738	0.00364465	0.0133192
PA14_17100	145.324	-1.12558	0.166143	-6.77477	1.24605e-11	1.01965e-10
PA14_17110	111.605	-10.0935	1.02774	-9.82107	9.13647e-23	1.19553e-21
PA14_17120	408.458	0.112622	0.0901307	1.24954	0.211469	0.39362
PA14_17130	1111.22	-0.701289	0.0688837	-10.1808	2.4167e-24	3.315e-23
PA14_17140	459.909	0.889077	0.0836096	10.6337	2.07777e-26	3.01011e-25
PA14_17150	8.97175	-6.4539	1.10095	-5.86209	4.5708e-09	3.1617e-08
PA14_17170	206.984	-7.79748	0.554172	-14.0705	5.76674e-45	1.28934e-43
PA14_17180	177.967	-0.536532	0.130109	-4.12372	3.72797e-05	0.000182353
PA14_17190	711.929	0.200662	0.0763842	2.62701	0.00861399	0.0288437
PA14_17210	251.644	-10.5448	1.02406	-10.297	7.2682e-25	1.01665e-23
PA14_17230	1787.43	0.14091	0.064693	2.17814	0.0293957	0.0843974
PA14_17250	3.59263	-0.154876	0.891349	-0.173755	0.862058	0.932034
PA14_17260	225.602	-0.0627308	0.144788	-0.433259	0.664826	0.82095
PA14_17270	7.33369	-6.16674	1.11889	-5.5115	3.55784e-08	2.31708e-07
PA14_17280	989.156	-1.35828	0.081815	-16.6018	6.7615e-62	2.20681e-60
PA14_17290	122.813	-0.178637	0.204298	-0.874396	0.381903	0.594199
PA14_17320	779.823	-5.55787	0.145916	-38.0895	0	0
PA14_17330	187.837	-3.57397	0.172358	-20.7358	1.64849e-95	9.17821e-94
PA14_17340	1814.59	-1.2166	0.065698	-18.5181	1.47686e-76	6.21266e-75
PA14_17350	356.663	-0.0571789	0.0918286	-0.62267	0.533502	0.727021
PA14_17370	26.0725	-0.749438	0.324265	-2.31119	0.0208221	0.063066
PA14_17380	537.55	-0.0705995	0.0918912	-0.768294	0.442312	0.647896
PA14_17400	107.771	-0.140336	0.184749	-0.759603	0.447492	0.653124
PA14_17410	1158.47	0.153102	0.078704	1.94529	0.0517403	0.134972
PA14_17420	611.725	-0.164765	0.0748743	-2.20055	0.0277678	0.0809098
PA14_17440	967.021	-0.13581	0.0665005	-2.04223	0.0411285	0.111755
PA14_17450	1807	-0.254387	0.05287	-4.81155	1.49764e-06	8.45439e-06
PA14_17460	234.589	-0.254478	0.112405	-2.26394	0.0235776	0.0702503
PA14_17470	1846.58	-0.010528	0.0535307	-0.196672	0.844084	0.921305
PA14_17480	1100.47	0.132409	0.066576	1.98884	0.0467193	0.124213
PA14_17490	77.758	-2.70993	0.220528	-12.2883	1.04626e-34	1.85678e-33
PA14_17500	1791.91	-0.0101449	0.0564619	-0.179676	0.857407	0.92853
PA14_17510	131.772	-0.436678	0.148091	-2.94872	0.00319093	0.0118208
PA14_17520	344.86	0.155935	0.111496	1.39856	0.161944	0.323147
PA14_17530	786.966	1.16573	0.0842269	13.8403	1.45576e-43	3.17972e-42
PA14_17540	752.012	0.0777693	0.0804844	0.966265	0.333912	0.541486
PA14_17550	706.118	0.126656	0.0841957	1.50431	0.132502	0.282511
PA14_17570	33.6132	0.214743	0.292502	0.734158	0.462852	0.66782
PA14_17580	318.954	0.203967	0.109935	1.85534	0.0635481	0.159052
PA14_17590	529.049	-0.0950375	0.0817978	-1.16186	0.245293	0.439161
PA14_17600	168.443	-0.725981	0.122755	-5.91409	3.33719e-09	2.33631e-08
PA14_17610	1920.56	0.216611	0.0730227	2.96635	0.00301356	0.011215
PA14_17620	121.167	0.041085	0.154609	0.265735	0.790443	0.892431
PA14_17630	524.381	0.166964	0.0824658	2.02465	0.0429038	0.115749
PA14_17640	2.99109	0.478801	0.965167	0.496081	0.619837	0.789781
PA14_17650	269.923	-0.0163515	0.0999093	-0.163664	0.869996	0.936095
PA14_17660	1473.3	-0.212061	0.0550856	-3.84967	0.000118278	0.000545214
PA14_17670	82.3645	-0.503783	0.192031	-2.62345	0.00870445	0.029078
PA14_17690	42.0703	-0.184397	0.246552	-0.747903	0.454519	0.659376
PA14_17700	489.979	-0.230764	0.0805981	-2.86315	0.00419458	0.0151245
PA14_17710	337.294	0.000437401	0.0987309	0.00443023	0.996465	0.998575
PA14_17720	904.45	0.0639122	0.0631987	1.01129	0.311878	0.51893
PA14_17730	1207.55	0.216172	0.0637341	3.39178	0.000694391	0.00286588
PA14_17740	1716.64	0.225602	0.060388	3.73587	0.000187065	0.000843654
PA14_17760	492.485	-0.0108994	0.0929108	-0.11731	0.906614	0.953752
PA14_17780	1087.54	-0.0816384	0.0737318	-1.10723	0.268192	0.466625
PA14_17790	733.957	-0.527084	0.0779315	-6.76343	1.34761e-11	1.09958e-10
PA14_17810	857.52	0.189034	0.0674275	2.80351	0.0050549	0.0178303
PA14_17820	4443.69	0.0358912	0.0543552	0.660309	0.509056	0.708908
PA14_17850	268.83	-0.0211626	0.105276	-0.201019	0.840683	0.919361
PA14_17860	225.73	-0.0669744	0.111219	-0.602185	0.547051	0.737058
PA14_17880	722.049	-0.239318	0.0700932	-3.41428	0.000639497	0.0026567
PA14_17890	175.703	-0.529532	0.13207	-4.00947	6.08542e-05	0.000290902
PA14_17900	805.439	0.177446	0.0750615	2.36401	0.0180782	0.0557666
PA14_17910	37.9223	-0.157463	0.25719	-0.612244	0.540376	0.731732
PA14_17920	106.998	0.126399	0.153334	0.824332	0.409751	0.61789
PA14_17930	149.625	-2.64459	0.1725	-15.331	4.74608e-53	1.25363e-51
PA14_17940	831.325	-4.19322	0.0995424	-42.125	0	0
PA14_17960	2392.74	-0.0762584	0.0913234	-0.835037	0.403697	0.612442
PA14_17990	1161.81	-0.0698147	0.0607867	-1.14852	0.250754	0.446404
PA14_18010	20.917	-0.529667	0.399098	-1.32716	0.184456	0.355696
PA14_18020	282.187	0.234194	0.113153	2.0697	0.0384802	0.105672
PA14_18040	1172.95	0.0319786	0.0632851	0.50531	0.613341	0.785415
PA14_18050	1093.51	-0.162196	0.061854	-2.62224	0.00873545	0.0291644
PA14_18060	261.978	-0.10804	0.104713	-1.03177	0.302181	0.506967
PA14_18070	957.013	0.0817302	0.0725523	1.1265	0.259954	0.456386
PA14_18080	363.699	0.475466	0.091375	5.20346	1.9561e-07	1.20354e-06
PA14_18090	282.419	-0.0475805	0.100694	-0.472526	0.636551	0.801424
PA14_18100	74.1676	0.0218386	0.181188	0.12053	0.904063	0.953598
PA14_18110	257.504	0.264453	0.113099	2.33825	0.0193743	0.0592495
PA14_18120	429.246	-5.97219	0.218092	-27.3838	4.27599e-165	5.92277e-163
PA14_18140	908.46	-0.0546156	0.0691573	-0.78973	0.429686	0.637124
PA14_18150	1725.38	-0.0118983	0.0718028	-0.165708	0.868387	0.935072
PA14_18160	335.904	-1.04426	0.094945	-10.9986	3.88249e-28	5.94303e-27
PA14_18180	141.161	0.364813	0.138433	2.63531	0.00840595	0.0282136
PA14_18200	15.6535	-0.0443221	0.407051	-0.108886	0.913293	0.957174
PA14_18210	573.006	0.106942	0.110389	0.968772	0.332659	0.540226
PA14_18230	61.9247	-0.320547	0.199076	-1.61017	0.107361	0.241562
PA14_18250	502.04	0.382905	0.0932448	4.10645	4.01785e-05	0.000195689
PA14_18260	12.621	0.0260631	0.479952	0.0543036	0.956693	0.979242
PA14_18275	1839.92	-0.0859074	0.100136	-0.857911	0.390942	0.601018
PA14_18300	24.6522	0.105617	0.325003	0.324972	0.745202	0.871395
PA14_18310	1392.91	0.0610758	0.0690674	0.884292	0.376539	0.588433
PA14_18320	7.72294	-0.743435	0.565905	-1.31371	0.188943	0.362518
PA14_18330	104.374	0.0330988	0.16414	0.20165	0.84019	0.919175
PA14_18340	555.606	-0.0744299	0.0820424	-0.907212	0.364295	0.576597
PA14_18350	70.3393	-0.0400975	0.202779	-0.19774	0.843249	0.920748
PA14_18360	474.703	-0.0387315	0.080699	-0.47995	0.631263	0.797709
PA14_18370	243.599	0.0292265	0.132405	0.220736	0.825298	0.911665
PA14_18380	443.537	0.125134	0.0852404	1.46802	0.1421	0.297013
PA14_18450	138.185	-1.28065	0.146227	-8.75799	1.98757e-18	2.24402e-17
PA14_18470	3390.31	0.223281	0.0540541	4.13069	3.61672e-05	0.000177522
PA14_18480	345.293	0.446344	0.094671	4.71468	2.42089e-06	1.34391e-05
PA14_18500	470.673	-0.164313	0.0813738	-2.01924	0.0434623	0.117089
PA14_18520	192.839	-0.0167147	0.115448	-0.144781	0.884884	0.942294
PA14_18550	338.887	-0.00298726	0.109471	-0.0272881	0.97823	0.99013
PA14_18565	74.3423	0.0777823	0.18208	0.427188	0.669242	0.823211
PA14_18580	3440.18	0.0358529	0.0553455	0.6478	0.517114	0.715568
PA14_18600	874.71	-0.699806	0.0645898	-10.8346	2.35953e-27	3.50779e-26
PA14_18610	2662.79	0.144431	0.0556617	2.59479	0.00946475	0.0313048
PA14_18625	1186.11	0.141014	0.0635529	2.21885	0.0264972	0.0777121
PA14_18630	641.803	0.101246	0.0745013	1.35898	0.174151	0.339748
PA14_18640	149.622	-7.55859	0.600129	-12.595	2.25085e-36	4.15018e-35
PA14_18650	388.56	-0.463533	0.103764	-4.4672	7.925e-06	4.19833e-05
PA14_18660	367.966	-0.0202174	0.0989016	-0.204419	0.838026	0.918578
PA14_18670	1331.7	-0.0947039	0.0642756	-1.4734	0.140642	0.2949
PA14_18680	346.261	0.113944	0.0915628	1.24444	0.213338	0.396415
PA14_18690	453.013	-0.0972561	0.101019	-0.962753	0.335672	0.543969
PA14_18700	491.405	-0.0966225	0.0860963	-1.12226	0.261751	0.458226
PA14_18710	800.676	-1.69271	0.0783852	-21.5948	2.01105e-103	1.31273e-101
PA14_18720	276.118	0.209929	0.117075	1.79312	0.0729534	0.177736
PA14_18740	959.997	-0.0633371	0.0700329	-0.904391	0.365788	0.578155
PA14_18750	801.835	-0.0342033	0.0644313	-0.530848	0.595524	0.77515
PA14_18760	465.921	-0.204417	0.0880479	-2.32166	0.0202514	0.0616333
PA14_18780	932.205	0.00360816	0.0727098	0.0496241	0.960422	0.980741
PA14_18790	1663.12	0.0185316	0.05925	0.312769	0.754456	0.877264
PA14_18800	763.643	0.00852921	0.0791941	0.1077	0.914234	0.957425
PA14_18810	228.319	0.270467	0.12131	2.22955	0.0257774	0.075889
PA14_18820	232.583	0.121218	0.112101	1.08133	0.279549	0.481269
PA14_18830	3667.93	0.389953	0.0414803	9.40091	5.40924e-21	6.66357e-20
PA14_18850	225.102	-0.346047	0.112976	-3.06303	0.00219108	0.00835672
PA14_18860	1493.26	0.0334958	0.0528655	0.633604	0.526339	0.722239
PA14_18870	1468.25	0.300447	0.0779796	3.85289	0.000116733	0.000538964
PA14_18880	412.492	-0.0702995	0.119221	-0.589658	0.55542	0.744288
PA14_18900	1018.55	0.175357	0.0622481	2.81706	0.00484652	0.0171806
PA14_18920	11.9922	-1.12652	0.461745	-2.43971	0.0146991	0.046453
PA14_18930	1117.05	-0.196757	0.0849741	-2.31549	0.0205862	0.0624514
PA14_18950	170.145	-1.76497	0.135925	-12.9849	1.49111e-38	2.92e-37
PA14_18960	198.817	0.153378	0.119994	1.27821	0.201177	0.379059
PA14_18970	155.615	-0.0142754	0.156441	-0.091251	0.927293	0.964558
PA14_18985	171.546	-0.0634889	0.133216	-0.476587	0.633656	0.799318
PA14_19010	136.852	-0.0902607	0.140841	-0.64087	0.521607	0.718983
PA14_19020	590.345	-0.0524661	0.0747503	-0.701885	0.482751	0.685181
PA14_19030	252.612	-0.238549	0.148715	-1.60407	0.1087	0.243801
PA14_19050	5.22362	-5.67714	1.17084	-4.84878	1.24223e-06	7.09718e-06
PA14_19090	378.438	-0.436839	0.106506	-4.10154	4.10409e-05	0.000199547
PA14_19100	495.397	-0.0723383	0.0913676	-0.791728	0.428519	0.635561
PA14_19110	348.663	-0.0440509	0.0938377	-0.469437	0.638758	0.803078
PA14_19120	7205.75	0.466452	0.0442679	10.537	5.83162e-26	8.2588e-25
PA14_19130	828.573	0.437697	0.0778467	5.62255	1.88154e-08	1.24974e-07
PA14_19140	457.406	0.120481	0.0875288	1.37647	0.168677	0.331919
PA14_19150	249.882	-0.0480254	0.107394	-0.44719	0.654738	0.814336
PA14_19160	593.811	0.410402	0.0754791	5.4373	5.40955e-08	3.49497e-07
PA14_19170	106.385	0.196039	0.15289	1.28222	0.199766	0.377402
PA14_19190	1443.81	-0.0119746	0.0760833	-0.157389	0.874939	0.937528
PA14_19205	122.263	0.064629	0.15302	0.422357	0.672764	0.825546
PA14_19210	37.6007	0.303381	0.322976	0.939331	0.347561	0.558201
PA14_19270	400.421	0.105426	0.091687	1.14984	0.250209	0.445993
PA14_19290	783.175	1.49219	0.0940723	15.8621	1.15876e-56	3.44533e-55
PA14_19310	833.285	0.0274678	0.0794634	0.345666	0.729593	0.862661
PA14_19320	775.164	-0.0043866	0.0693167	-0.0632835	0.949541	0.975379
PA14_19330	330.717	-0.230062	0.105562	-2.17941	0.0293013	0.0842293
PA14_19340	1308.1	0.00226481	0.0587583	0.0385445	0.969254	0.985576
PA14_19350	96.9988	0.342749	0.196132	1.74754	0.0805431	0.193099
PA14_19360	396.23	0.0251625	0.105085	0.23945	0.810757	0.901828
PA14_19370	7997.55	-0.0229225	0.0484496	-0.473121	0.636127	0.801382
PA14_19380	772.26	-0.150482	0.0738664	-2.03722	0.0416284	0.112898
PA14_19390	372.533	-0.126395	0.126127	-1.00212	0.316284	0.522938
PA14_19400	490.446	0.188201	0.0826736	2.27643	0.0228202	0.0682442
PA14_19410	271.876	0.00171865	0.100897	0.0170337	0.98641	0.99346
PA14_19430	21.6536	-0.92172	0.392295	-2.34956	0.0187957	0.0577288
PA14_19450	400.6	0.211618	0.0824107	2.56785	0.0102332	0.033592
PA14_19470	3440.06	-0.063754	0.0563816	-1.13076	0.258156	0.453931
PA14_19490	52.1639	-0.115601	0.234224	-0.493548	0.621625	0.79135
PA14_19500	601.085	0.311954	0.082798	3.76765	0.000164792	0.000748683
PA14_19510	48.4905	0.241532	0.238133	1.01427	0.310452	0.517633
PA14_19520	1025.3	0.0242513	0.0732588	0.331036	0.740617	0.869001
PA14_19530	348.503	-2.26368	0.113175	-20.0016	5.33829e-89	2.68285e-87
PA14_19540	807.191	0.0975276	0.0721312	1.35209	0.176348	0.342734
PA14_19560	556.569	0.597028	0.100881	5.91814	3.25594e-09	2.28508e-08
PA14_19570	673.691	0.435415	0.0850127	5.12177	3.0268e-07	1.83254e-06
PA14_19580	169.032	-0.294001	0.154497	-1.90296	0.0570462	0.145472
PA14_19590	429.531	0.102536	0.0859641	1.19277	0.232959	0.42281
PA14_19600	531.73	0.059476	0.0873217	0.681114	0.4958	0.697114
PA14_19610	362.685	-0.0364856	0.0932795	-0.391143	0.695691	0.839531
PA14_19620	307.036	0.0297869	0.105581	0.282123	0.777849	0.889032
PA14_19630	842.586	0.048022	0.0722908	0.66429	0.506505	0.706464
PA14_19640	97.0158	0.361265	0.186714	1.93486	0.0530079	0.13727
PA14_19650	357.661	0.470078	0.104433	4.50124	6.75569e-06	3.59228e-05
PA14_19660	35.0947	0.372795	0.271571	1.37274	0.169834	0.333386
PA14_19670	207.045	0.0211786	0.130799	0.161917	0.871372	0.936333
PA14_19680	628.512	-0.0540406	0.100551	-0.537443	0.590961	0.771987
PA14_19690	554.453	0.187702	0.0850193	2.20776	0.0272609	0.079758
PA14_19700	1.48707	-0.0728012	1.19458	-0.060943	0.951405	0.975452
PA14_19710	116.242	-0.10614	0.153151	-0.693042	0.488283	0.690822
PA14_19720	948.716	-0.0323868	0.0726513	-0.445784	0.655753	0.814685
PA14_19730	303.691	0.233557	0.106396	2.19517	0.0281514	0.0818177
PA14_19740	298.514	-4.82331	0.186667	-25.8391	3.22532e-147	3.81596e-145
PA14_19750	831.898	0.0676617	0.0802047	0.843613	0.398886	0.608244
PA14_19770	290.001	0.0497896	0.10819	0.460206	0.645368	0.808424
PA14_19800	425.852	0.17504	0.106994	1.63598	0.101844	0.23257
PA14_19810	630.217	0.262296	0.0911756	2.87682	0.00401703	0.0145396
PA14_19850	90.2742	0.00137572	0.170247	0.00808072	0.993553	0.99724
PA14_19860	169.25	0.0930977	0.136228	0.683396	0.494357	0.695775
PA14_19870	257.536	0.0210193	0.128723	0.163292	0.870289	0.936232
PA14_19900	641.817	0.402528	0.0750966	5.36014	8.3158e-08	5.30623e-07
PA14_19910	673.554	0.105641	0.0725085	1.45694	0.145133	0.300807
PA14_19920	357.158	-1.731	0.120969	-14.3095	1.90963e-46	4.44458e-45
PA14_19940	1023.18	-0.0474553	0.062527	-0.758956	0.447879	0.653353
PA14_19950	689.018	0.16102	0.0953491	1.68874	0.0912689	0.213474
PA14_19960	1521.02	1.21202	0.058034	20.8846	7.38919e-97	4.37117e-95
PA14_19970	355.168	-0.11857	0.116328	-1.01927	0.308074	0.514725
PA14_19990	2023.25	0.305769	0.457494	0.668356	0.503906	0.705173
PA14_20000	502.627	-0.162136	0.0923886	-1.75494	0.0792703	0.19051
PA14_20010	3538.07	-0.00308697	0.0492038	-0.0627383	0.949975	0.975379
PA14_20020	709.57	0.444484	0.0879204	5.05553	4.29206e-07	2.55232e-06
PA14_20030	1282.08	-0.328781	0.0612664	-5.36641	8.03209e-08	5.13096e-07
PA14_20040	972.895	0.165711	0.069031	2.40053	0.0163714	0.0511403
PA14_20050	197.341	-0.0674957	0.11977	-0.563546	0.573063	0.758253
PA14_20060	680.641	-0.0504745	0.0764843	-0.659933	0.509297	0.70896
PA14_20070	732.761	-0.296143	0.0756649	-3.91388	9.08246e-05	0.000426275
PA14_20080	116.074	0.0577858	0.146371	0.39479	0.692998	0.8377
PA14_20100	313.078	-0.160425	0.0971102	-1.65199	0.0985363	0.226623
PA14_20110	343.229	0.120653	0.0970973	1.2426	0.214017	0.397304
PA14_20120	222.481	-0.0318483	0.126139	-0.252486	0.800665	0.897548
PA14_20130	234.862	0.294205	0.11554	2.54634	0.010886	0.0354074
PA14_20140	82.0708	-8.92688	1.03098	-8.65866	4.77362e-18	5.28449e-17
PA14_20150	316.269	-0.0194443	0.0921552	-0.210996	0.832891	0.916486
PA14_20170	335.598	-0.0348708	0.104555	-0.333517	0.738744	0.868412
PA14_20180	677.541	0.330564	0.0754262	4.38261	1.17265e-05	6.10403e-05
PA14_20190	971.263	0.392878	0.0654268	6.00486	1.915e-09	1.37836e-08
PA14_20200	401.206	-0.00505815	0.107078	-0.0472381	0.962323	0.981405
PA14_20230	323.368	0.0927897	0.0891419	1.04092	0.297912	0.501797
PA14_20250	400.156	-0.0274947	0.101865	-0.269913	0.787227	0.890925
PA14_20260	1665.19	-0.142095	0.0630052	-2.25529	0.0241153	0.0715896
PA14_20270	1403.66	0.235326	0.0668624	3.51956	0.000432265	0.0018527
PA14_20280	121.382	-0.208827	0.142365	-1.46684	0.142421	0.297246
PA14_20290	1235.81	0.0518819	0.0712513	0.728154	0.466519	0.670555
PA14_20300	1480.47	0.017055	0.0566105	0.30127	0.763209	0.882922
PA14_20320	702.339	-0.798562	0.0728339	-10.9642	5.68278e-28	8.65214e-27
PA14_20330	5.0347	0.0948358	0.697216	0.136021	0.891805	0.94647
PA14_20350	1152.73	0.0284831	0.0625595	0.455297	0.648896	0.809997
PA14_20360	164.758	-0.185819	0.152489	-1.21857	0.223008	0.409509
PA14_20380	639.046	0.0717515	0.0858428	0.835848	0.40324	0.612442
PA14_20390	1993.16	0.863576	0.0563148	15.3348	4.4767e-53	1.188e-51
PA14_20400	672.48	-0.00583878	0.0789482	-0.0739571	0.941045	0.972202
PA14_20420	447.118	0.055373	0.0878815	0.630087	0.528638	0.724278
PA14_20430	2989.28	-0.053888	0.0844903	-0.637801	0.523603	0.72051
PA14_20440	954.596	0.0804071	0.0704553	1.14125	0.253766	0.449863
PA14_20450	508.801	0.125117	0.085282	1.4671	0.142348	0.297205
PA14_20460	238.774	0.060008	0.121305	0.494689	0.62082	0.790501
PA14_20470	162.101	0.105911	0.138294	0.765836	0.443774	0.649367
PA14_20480	90.7428	0.119992	0.195735	0.613031	0.539856	0.73153
PA14_20491	174.045	-0.162903	0.120423	-1.35276	0.176134	0.342673
PA14_20500	570.981	-2.61131	0.090199	-28.9506	2.76019e-184	4.61033e-182
PA14_20510	976.512	0.463167	0.0635431	7.28902	3.12212e-13	2.76176e-12
PA14_20520	1870.14	-0.116123	0.0504752	-2.3006	0.0214143	0.064584
PA14_20530	605.209	0.193168	0.081751	2.36288	0.0181335	0.0558763
PA14_20550	308.711	0.175235	0.0953781	1.83726	0.0661712	0.164458
PA14_20560	1452.72	0.0373774	0.0584551	0.63942	0.52255	0.719757
PA14_20570	1056.73	0.170238	0.0709243	2.40028	0.0163827	0.0511474
PA14_20580	1.83188	0.0840902	1.27561	0.0659215	0.94744	0.975192
PA14_20590	0.483623	-1.11025	2.27753	-0.487478	0.625919	0.794593
PA14_20600	541.587	-0.121182	0.0847272	-1.43026	0.152642	0.310796
PA14_20610	48.1076	-0.977699	0.239811	-4.07696	4.5628e-05	0.000221282
PA14_20620	1701.43	0.101349	0.0546761	1.85363	0.0637923	0.159593
PA14_20630	13.5536	-0.18513	0.45175	-0.409806	0.681948	0.830713
PA14_20640	179.899	0.463127	0.155305	2.98205	0.00286326	0.0107216
PA14_20650	35.0838	-0.125759	0.295187	-0.426031	0.670085	0.823683
PA14_20670	477.297	0.0602336	0.0854545	0.704862	0.480896	0.683607
PA14_20680	373.034	-0.0563929	0.0968011	-0.582564	0.560187	0.748894
PA14_20690	217.205	-0.282041	0.112979	-2.4964	0.0125461	0.040368
PA14_20700	172.815	-0.121202	0.131422	-0.922242	0.356402	0.568223
PA14_20720	108.72	-4.74256	0.298651	-15.8799	8.73021e-57	2.60941e-55
PA14_20730	362.43	-0.306525	0.0910546	-3.36638	0.000761606	0.00311387
PA14_20740	43.5732	0.0938186	0.25409	0.369234	0.711953	0.849586
PA14_20750	1.06027	1.72547	1.6587	1.04025	0.298222	0.502106
PA14_20760	1001.42	0.204859	0.0681338	3.00671	0.00264093	0.00993893
PA14_20770	253.699	-0.0695621	0.152273	-0.456824	0.647797	0.809426
PA14_20780	594.937	-0.110787	0.0745942	-1.48519	0.137493	0.289945
PA14_20800	773.42	0.103915	0.073789	1.40827	0.159051	0.319314
PA14_20810	456.936	-0.596564	0.0871451	-6.84564	7.61359e-12	6.27541e-11
PA14_20820	6.42411	-1.45914	0.66489	-2.19456	0.0281949	0.0819022
PA14_20840	231.321	-0.401556	0.111255	-3.60932	0.000306997	0.00134317
PA14_20850	2067.27	0.170722	0.0638415	2.67415	0.00749199	0.0254925
PA14_20860	231.221	-0.167674	0.127811	-1.31189	0.189558	0.362946
PA14_20870	793.45	0.0790377	0.0883026	0.895078	0.370745	0.582585
PA14_20880	5527.15	0.0152326	0.0549612	0.277152	0.781664	0.889964
PA14_20890	1406.83	0.106511	0.0589172	1.8078	0.0706374	0.172984
PA14_20900	96.1194	0.472614	0.158578	2.98032	0.0028795	0.0107725
PA14_20920	208.494	0.0114645	0.113731	0.100803	0.919707	0.95976
PA14_20940	532.93	0.0966454	0.0810198	1.19286	0.232923	0.42281
PA14_20950	843.818	0.0108214	0.068465	0.158058	0.874411	0.937528
PA14_20960	725.603	0.0491119	0.085804	0.572373	0.56707	0.754013
PA14_20970	2597.99	-0.0207665	0.0522936	-0.397113	0.691284	0.837158
PA14_20980	1276.36	0.0218394	0.0740607	0.294886	0.768081	0.885851
PA14_21000	107.3	0.0333307	0.161292	0.206648	0.836285	0.918035
PA14_21010	2097.62	0.0671654	0.0553102	1.21434	0.224617	0.411617
PA14_21020	451.629	0.747884	0.0972695	7.68878	1.48546e-14	1.41542e-13
PA14_21030	2055.02	-0.078637	0.0494693	-1.58961	0.111922	0.248574
PA14_21040	1269.25	-0.0700418	0.0652154	-1.07401	0.282819	0.48403
PA14_21050	385.178	0.0572339	0.0964981	0.593109	0.553108	0.742051
PA14_21060	383.41	-0.0312725	0.113924	-0.274503	0.783698	0.890085
PA14_21070	160.971	-0.266014	0.140286	-1.89622	0.057931	0.147271
PA14_21080	55.4304	0.173032	0.225322	0.767933	0.442527	0.648043
PA14_21090	235.203	0.246634	0.103821	2.37556	0.0175224	0.054288
PA14_21110	368.099	0.2937	0.109242	2.68853	0.00717663	0.0245076
PA14_21120	51.2185	1.04316	0.227022	4.59495	4.32852e-06	2.35231e-05
PA14_21130	253.137	0.0019204	0.12074	0.0159053	0.98731	0.99378
PA14_21140	40.5627	-0.413606	0.281851	-1.46746	0.14225	0.297109
PA14_21150	902.384	-0.0868522	0.0645656	-1.34518	0.178568	0.346105
PA14_21160	1926.67	0.0689824	0.0563726	1.22369	0.22107	0.406956
PA14_21175	887.844	0.212606	0.0717254	2.96417	0.003035	0.0112726
PA14_21180	659.227	-0.0916273	0.246275	-0.372053	0.709853	0.848507
PA14_21190	288.759	-0.0597077	0.0959124	-0.622523	0.533598	0.727021
PA14_21210	201.197	-0.0415059	0.119982	-0.345935	0.729392	0.862602
PA14_21220	259.124	-0.411713	0.113431	-3.62962	0.000283834	0.00125244
PA14_21230	1033.73	0.0167264	0.063079	0.265165	0.790882	0.892749
PA14_21240	7.52113	0.777537	0.566387	1.3728	0.169814	0.333386
PA14_21250	937.13	0.0747212	0.0646712	1.1554	0.247926	0.443145
PA14_21260	424.343	-0.140835	0.0912036	-1.54419	0.122543	0.266433
PA14_21280	357.114	-0.0748625	0.116168	-0.644431	0.519296	0.717189
PA14_21290	666.858	0.13185	0.0763089	1.72785	0.0840157	0.199113
PA14_21300	476.342	0.033038	0.0832531	0.396839	0.691486	0.837158
PA14_21310	375.949	0.615431	0.292013	2.10755	0.0350701	0.0983037
PA14_21320	355.25	0.0987364	0.0983215	1.00422	0.315273	0.522145
PA14_21340	1236.22	-0.0181941	0.0677328	-0.268616	0.788225	0.891661
PA14_21370	780.802	-0.128678	0.0797015	-1.6145	0.10642	0.240015
PA14_21380	482.748	-0.0658572	0.0991448	-0.664253	0.506529	0.706464
PA14_21400	681.098	-0.0220554	0.0912142	-0.241798	0.808937	0.90115
PA14_21410	112.449	-0.0184816	0.167509	-0.110332	0.912146	0.956439
PA14_21440	287.303	0.0552682	0.109033	0.506896	0.612228	0.785161
PA14_21450	238.16	-0.0828139	0.109541	-0.756008	0.449644	0.6547
PA14_21460	1739.23	0.911849	0.0584977	15.5878	8.8163e-55	2.46639e-53
PA14_21470	2.32682	-1.02842	1.06387	-0.966674	0.333707	0.541309
PA14_21480	479.369	0.0947312	0.0962142	0.984587	0.324827	0.532533
PA14_21490	164.118	0.205779	0.154683	1.33033	0.18341	0.354039
PA14_21510	384.985	-0.0863203	0.0992987	-0.869299	0.384683	0.595536
PA14_21520	416.563	0.300025	0.0857523	3.49874	0.000467459	0.00199452
PA14_21530	3025.84	-0.0149554	0.0548276	-0.272771	0.78503	0.89039
PA14_21540	204.174	1.1834	0.137398	8.61293	7.12164e-18	7.79264e-17
PA14_21550	306.349	0.0978693	0.0925593	1.05737	0.290343	0.493375
PA14_21560	186.298	0.0321177	0.135173	0.237604	0.812188	0.902803
PA14_21570	322.878	0.154514	0.113969	1.35576	0.175175	0.341276
PA14_21580	179.873	-0.132161	0.122391	-1.07982	0.280221	0.481359
PA14_21590	1052.96	0.0250911	0.0770983	0.325443	0.744845	0.871262
PA14_21600	197.925	-5.36054	0.26175	-20.4797	3.26876e-93	1.73488e-91
PA14_21610	2413.74	0.0409395	0.0465522	0.879431	0.379167	0.59138
PA14_21620	714.541	-0.0424282	0.0712741	-0.595283	0.551655	0.740801
PA14_21630	922.369	-0.40776	0.176902	-2.305	0.0211663	0.0639381
PA14_21640	1259.91	0.115738	0.0802492	1.44224	0.149235	0.306249
PA14_21650	695.937	0.0520649	0.0675628	0.770615	0.440935	0.646713
PA14_21660	157.727	0.121059	0.160548	0.754035	0.450828	0.656139
PA14_21670	391.539	-0.152852	0.0921378	-1.65895	0.0971252	0.224217
PA14_21680	616.813	-0.17416	0.0834555	-2.08686	0.0369007	0.102174
PA14_21690	1106.01	0.233708	0.0636295	3.67295	0.000239769	0.00106796
PA14_21700	196.67	-0.401475	0.124834	-3.21606	0.00129962	0.00511826
PA14_21710	2046.61	0.108822	0.0499077	2.18048	0.0292221	0.0841544
PA14_21720	1652.68	0.102575	0.0638638	1.60615	0.108241	0.24335
PA14_21730	778.324	0.044902	0.0726637	0.617942	0.536613	0.729399
PA14_21750	482.197	-0.000804443	0.0908653	-0.00885314	0.992936	0.996798
PA14_21760	1451.82	0.0868525	0.0572245	1.51775	0.129077	0.277138
PA14_21770	210.377	-0.0341101	0.114949	-0.296742	0.766664	0.884935
PA14_21780	4.68209	-2.04046	0.895825	-2.27775	0.0227416	0.0680451
PA14_21790	103.582	-0.578194	0.178407	-3.24086	0.00119169	0.00473921
PA14_21800	477.361	-2.16407	0.0954137	-22.6809	6.91564e-114	5.16762e-112
PA14_21820	319.052	0.0321992	0.104485	0.30817	0.757953	0.87899
PA14_21830	489.028	-0.102346	0.0994705	-1.02891	0.303522	0.508766
PA14_21840	1715.7	0.149664	0.0562043	2.66286	0.00774806	0.0263165
PA14_21850	2358.27	0.0163712	0.070096	0.233553	0.815332	0.904526
PA14_21860	235.913	0.154487	0.125137	1.23455	0.216999	0.401476
PA14_21870	414.462	-0.0695789	0.110977	-0.626968	0.53068	0.724645
PA14_21890	185.35	-0.134603	0.130518	-1.0313	0.3024	0.507186
PA14_21900	319.798	0.173636	0.0948113	1.83138	0.0670432	0.166118
PA14_21910	326.006	0.294937	0.0903681	3.26372	0.00109958	0.00439447
PA14_21920	0.426675	-2.07607	2.51153	-0.826618	0.408454	0.616425
PA14_21930	1785.8	0.121584	0.0632083	1.92355	0.0544114	0.140137
PA14_21940	168.33	-0.103724	0.13059	-0.794271	0.427038	0.634689
PA14_21960	888.956	-0.0354295	0.0804813	-0.44022	0.659778	0.816847
PA14_21970	876.308	-0.0346411	0.0800927	-0.432513	0.665369	0.821263
PA14_21980	1055.86	0.096372	0.0619259	1.55625	0.11965	0.261443
PA14_21990	123.418	-0.1868	0.159527	-1.17096	0.241614	0.433943
PA14_22000	65.7828	-0.195178	0.217427	-0.897673	0.36936	0.581535
PA14_22010	94.0322	0.111436	0.175435	0.635202	0.525297	0.721616
PA14_22020	6.57878	-0.665372	0.730108	-0.911333	0.36212	0.574114
PA14_22040	2724.86	-0.216231	0.0591466	-3.65585	0.000256335	0.00113818
PA14_22050	187.847	1.30667	0.11954	10.9308	8.21231e-28	1.24036e-26
PA14_22060	84.6792	-3.04005	0.237227	-12.815	1.35224e-37	2.55128e-36
PA14_22075	275.317	-0.276728	0.104026	-2.66019	0.00780959	0.0264622
PA14_22080	2.62909	-0.3806	0.99731	-0.381627	0.702738	0.84443
PA14_22090	567.572	-0.1024	0.229294	-0.44659	0.655171	0.814399
PA14_22100	696.891	-0.0376257	0.0886818	-0.424278	0.671363	0.824376
PA14_22110	658.065	-0.170604	0.0846858	-2.01455	0.0439515	0.118294
PA14_22120	301.027	0.0896555	0.110485	0.811474	0.417094	0.62531
PA14_22140	416.055	0.201161	0.118549	1.69687	0.0897216	0.210375
PA14_22160	613.877	-0.0342582	0.102678	-0.333649	0.738645	0.868412
PA14_22180	701.987	0.152685	0.196927	0.775338	0.43814	0.644444
PA14_22190	929.053	-0.0637588	0.0698874	-0.912307	0.361607	0.573943
PA14_22210	391.786	-0.110625	0.135789	-0.814683	0.415254	0.623045
PA14_22220	201.649	0.0978058	0.115776	0.844786	0.398231	0.607781
PA14_22230	94.7072	-0.0973064	0.188131	-0.517226	0.604998	0.78072
PA14_22240	530.85	-0.127525	0.104657	-1.2185	0.223034	0.409509
PA14_22250	347.327	-0.167262	0.100741	-1.66031	0.0968512	0.223767
PA14_22260	922.526	0.153189	0.0797375	1.92116	0.054711	0.140717
PA14_22270	271.485	0.0885892	0.0998954	0.886819	0.375176	0.586949
PA14_22280	634.392	0.0174177	0.0775176	0.224694	0.822217	0.9095
PA14_22290	2290.79	-0.159696	0.0483694	-3.3016	0.000961355	0.00387476
PA14_22310	461.915	0.0144725	0.0792538	0.18261	0.855104	0.927629
PA14_22320	427.651	-3.23516	0.140059	-23.0985	4.78823e-118	3.77672e-116
PA14_22330	2668.52	0.132224	0.0705944	1.87301	0.0610664	0.153722
PA14_22340	255.667	0.00390356	0.104387	0.0373949	0.97017	0.986115
PA14_22350	180.979	0.191251	0.135117	1.41545	0.156937	0.316719
PA14_22370	49.4681	-0.126606	0.236857	-0.534526	0.592978	0.773264
PA14_22380	795.395	0.345813	0.0727105	4.75603	1.97434e-06	1.10575e-05
PA14_22400	231.832	0.586866	0.131925	4.44847	8.64852e-06	4.55612e-05
PA14_22410	457.632	0.072632	0.127703	0.568759	0.56952	0.756412
PA14_22420	301.595	0.166071	0.0995914	1.66753	0.0954094	0.220885
PA14_22440	118.014	0.0974446	0.155496	0.626668	0.530877	0.724723
PA14_22450	441.032	-0.152028	0.102078	-1.48933	0.136401	0.28807
PA14_22460	469.457	0.128553	0.0902421	1.42454	0.154291	0.312725
PA14_22470	1999.18	0.0737615	0.0774703	0.952126	0.341033	0.550362
PA14_22480	396.817	-0.029524	0.112871	-0.261573	0.79365	0.894274
PA14_22490	542.54	-0.3329	0.0791205	-4.2075	2.58207e-05	0.000128628
PA14_22500	825.879	-0.100084	0.0698644	-1.43255	0.151987	0.310034
PA14_22510	392.63	0.177137	0.100666	1.75965	0.0784669	0.188819
PA14_22520	549.996	0.53939	0.0971461	5.55235	2.81849e-08	1.84403e-07
PA14_22530	390.46	0.210321	0.108454	1.93927	0.0524689	0.136309
PA14_22540	73.6809	0.217881	0.183854	1.18507	0.235988	0.427079
PA14_22550	71.9843	-1.41266	0.203951	-6.92646	4.31496e-12	3.60893e-11
PA14_22560	13.7365	-0.509397	0.431544	-1.18041	0.237839	0.429607
PA14_22570	422.143	0.00227516	0.0803358	0.0283206	0.977406	0.99013
PA14_22580	2120.14	-0.0354747	0.172622	-0.205506	0.837177	0.918435
PA14_22590	63.0973	0.0415839	0.205433	0.202421	0.839588	0.918693
PA14_22600	859.624	0.038183	0.0807072	0.473105	0.636138	0.801382
PA14_22620	98.1501	0.512056	0.197891	2.58756	0.00966572	0.0318767
PA14_22630	695.746	0.11371	0.114824	0.990294	0.32203	0.529936
PA14_22640	1121.9	0.26352	0.0623429	4.22694	2.36888e-05	0.000118319
PA14_22650	0.558495	1.83541	2.00109	0.917204	0.359036	0.570819
PA14_22660	1411.73	0.124572	0.0655934	1.89916	0.0575433	0.146476
PA14_22670	7715.28	0.0812583	0.0467427	1.73842	0.0821371	0.195425
PA14_22680	56.1628	-0.462508	0.209197	-2.21087	0.027045	0.0791693
PA14_22690	1289.82	-1.0054	0.0734086	-13.6959	1.07404e-42	2.28444e-41
PA14_22700	105.778	-0.206124	0.156975	-1.3131	0.189149	0.362776
PA14_22710	751.593	0.0240611	0.0679494	0.354104	0.723261	0.858391
PA14_22720	285.291	0.418957	0.123633	3.38872	0.000702202	0.00289601
PA14_22730	185.835	-0.130176	0.135841	-0.958297	0.337913	0.546841
PA14_22740	33.2428	0.211018	0.27894	0.756498	0.44935	0.654662
PA14_22760	294.242	-0.217269	0.0998726	-2.17546	0.0295954	0.084842
PA14_22770	278.43	0.125397	0.298439	0.420177	0.674356	0.826785
PA14_22780	1683.79	-0.149319	0.0553461	-2.69792	0.00697746	0.0238705
PA14_22800	454.737	-0.657854	0.0858049	-7.66685	1.76271e-14	1.66563e-13
PA14_22820	498.955	-0.115454	0.0809798	-1.42571	0.153952	0.312248
PA14_22830	1756.94	0.206745	0.212588	0.972512	0.330796	0.538745
PA14_22840	272.713	0.0566737	0.106038	0.534466	0.593019	0.773264
PA14_22860	2209.67	-0.00316815	0.0531174	-0.0596443	0.952439	0.976336
PA14_22870	90.4118	0.26736	0.171193	1.56174	0.118349	0.2593
PA14_22880	813.424	0.189538	0.0682142	2.77856	0.00545998	0.019116
PA14_22890	323.263	-0.120811	0.0982881	-1.22915	0.219015	0.404089
PA14_22910	116.88	-0.205476	0.162907	-1.26131	0.207197	0.388341
PA14_22930	487.284	0.398837	0.0910287	4.38144	1.17898e-05	6.13133e-05
PA14_22940	1111.87	-0.364941	0.0716791	-5.09132	3.55585e-07	2.13013e-06
PA14_22960	2710.76	0.0357441	0.0451403	0.791844	0.428452	0.635561
PA14_22980	433.399	0.0729218	0.0834694	0.873635	0.382317	0.594518
PA14_22990	424.084	0.212642	0.0864129	2.46077	0.0138639	0.0441482
PA14_23000	285.523	0.399934	0.124328	3.21676	0.00129647	0.0051094
PA14_23010	168.907	-0.182243	0.129624	-1.40593	0.159744	0.319769
PA14_23030	15.7797	-6.53294	1.07495	-6.07746	1.22102e-09	8.9128e-09
PA14_23050	138.425	-0.191935	0.135288	-1.41872	0.155982	0.315471
PA14_23060	296.259	-0.302124	0.0982128	-3.07622	0.00209641	0.00801719
PA14_23070	1369.16	0.0179212	0.0625862	0.286344	0.774615	0.887276
PA14_23080	928.943	0.0411781	0.0654828	0.628838	0.529455	0.724645
PA14_23090	1423.1	0.0879484	0.0673971	1.30493	0.191917	0.366107
PA14_23100	331.278	-0.150105	0.104122	-1.44162	0.14941	0.306317
PA14_23110	981.221	-0.31985	0.0914149	-3.49889	0.000467205	0.00199452
PA14_23120	189.531	0.00118206	0.120875	0.00977919	0.992197	0.996232
PA14_23130	515.653	0.186329	0.0794787	2.34439	0.0190583	0.0583777
PA14_23160	335.772	0.0490175	0.114512	0.428054	0.668612	0.82294
PA14_23170	218.501	0.0610766	0.110039	0.555045	0.578864	0.763262
PA14_23190	859.32	0.1024	0.0890233	1.15026	0.250037	0.445827
PA14_23200	66.0172	-1.36949	0.217044	-6.30973	2.79517e-10	2.11368e-09
PA14_23210	1101.36	-1.67827	0.0785492	-21.3659	2.77359e-101	1.7309e-99
PA14_23220	367.743	-4.208	0.144876	-29.0456	1.75048e-185	3.10656e-183
PA14_23240	718.271	-0.391294	0.0721005	-5.42706	5.72901e-08	3.68044e-07
PA14_23250	3207.75	-0.161686	0.0482902	-3.34821	0.00081335	0.0033135
PA14_23260	10.8584	-6.73402	1.09808	-6.13253	8.6494e-10	6.36269e-09
PA14_23270	165.144	0.694492	0.137338	5.05681	4.26331e-07	2.53788e-06
PA14_23280	102.174	-4.16333	0.266978	-15.5943	7.96176e-55	2.23836e-53
PA14_23290	110.459	-3.24151	0.204538	-15.848	1.45211e-56	4.29507e-55
PA14_23310	264.437	0.287829	0.321461	0.895377	0.370586	0.582495
PA14_23320	2.70894	-4.73918	1.31062	-3.61599	0.000299199	0.00131107
PA14_23330	344.164	-0.672476	0.0930984	-7.22328	5.07491e-13	4.43391e-12
PA14_23340	2320.46	0.386509	0.0628568	6.14903	7.79568e-10	5.76454e-09
PA14_23360	1521.63	0.49572	0.0792299	6.25672	3.93158e-10	2.93011e-09
PA14_23370	84.6599	0.292535	0.173768	1.68348	0.0922815	0.215311
PA14_23380	516.932	0.451569	0.0901337	5.00999	5.44327e-07	3.20335e-06
PA14_23390	297.376	0.531065	0.114655	4.63183	3.62442e-06	1.98105e-05
PA14_23400	648.17	0.280001	0.107879	2.59551	0.00944513	0.0312688
PA14_23410	1531.18	0.436335	0.0678921	6.4269	1.30235e-10	9.98121e-10
PA14_23420	729.483	1.34928	0.0806686	16.7262	8.44177e-63	2.80356e-61
PA14_23430	3567.1	0.479238	0.0552928	8.66728	4.42553e-18	4.90871e-17
PA14_23440	1385.38	0.543643	0.0983599	5.52708	3.256e-08	2.12294e-07
PA14_23450	1044.3	0.432597	0.0746692	5.79352	6.89282e-09	4.71051e-08
PA14_23460	574.684	0.321744	0.102296	3.14522	0.00165963	0.00643348
PA14_23470	2390.56	0.439325	0.0541323	8.11577	4.82707e-16	4.84327e-15
PA14_23480	173.243	0.0810417	0.134292	0.603476	0.546192	0.736619
PA14_23500	713.656	0.243843	0.0978082	2.49307	0.0126643	0.0406792
PA14_23510	569.727	-0.0716167	0.0821882	-0.871374	0.38355	0.595362
PA14_23520	618.456	0.194701	0.0895198	2.17495	0.029634	0.0849099
PA14_23530	13.3682	0.246342	0.439854	0.560054	0.575442	0.760516
PA14_23540	443.717	-0.124815	0.0856478	-1.45731	0.145032	0.300807
PA14_23560	173.086	-0.642245	0.127697	-5.02942	4.91956e-07	2.9072e-06
PA14_23580	102.701	-4.92015	0.324329	-15.1702	5.56787e-52	1.43727e-50
PA14_23590	802.299	0.213856	0.0902219	2.37034	0.0177719	0.055001
PA14_23610	333.087	-0.306766	0.111182	-2.75913	0.00579557	0.0202168
PA14_23620	1003.41	0.111506	0.0605824	1.84057	0.0656853	0.163611
PA14_23630	184.583	-0.126577	0.126456	-1.00096	0.316846	0.523528
PA14_23640	1160.63	0.161991	0.0594022	2.72702	0.00639099	0.0221038
PA14_23650	1442.41	-0.087033	0.0608764	-1.42967	0.152812	0.310796
PA14_23670	347.255	-0.0633143	0.102617	-0.616998	0.537236	0.729546
PA14_23680	183.987	-0.056885	0.128533	-0.44257	0.658077	0.815808
PA14_23690	1780.47	0.173025	0.0945291	1.83039	0.0671912	0.166338
PA14_23700	235.351	0.058054	0.115237	0.50378	0.614416	0.786125
PA14_23720	364.272	-0.884236	0.124227	-7.11789	1.0959e-12	9.45836e-12
PA14_23730	3751.54	0.126259	0.0614882	2.05338	0.0400354	0.109203
PA14_23750	208.223	-1.01223	0.143216	-7.06781	1.57397e-12	1.34415e-11
PA14_23760	110.09	-0.0665296	0.166017	-0.40074	0.688611	0.83602
PA14_23770	1925.87	-0.0191388	0.0560341	-0.341556	0.732685	0.864876
PA14_23790	1301.32	-0.0789036	0.0650827	-1.21236	0.225375	0.412401
PA14_23800	235.381	-0.0920567	0.113489	-0.811152	0.417278	0.625422
PA14_23810	789.165	-0.0176861	0.0720594	-0.245437	0.806118	0.900461
PA14_23830	1219.2	0.378732	0.0626395	6.04621	1.48291e-09	1.07554e-08
PA14_23840	349.163	-0.186516	0.103849	-1.79603	0.0724896	0.176936
PA14_23850	578.277	-0.115798	0.0877879	-1.31906	0.187149	0.360277
PA14_23860	38.8185	0.086374	0.265858	0.324888	0.745266	0.871395
PA14_23880	87.3617	-0.29393	0.229399	-1.2813	0.200087	0.377758
PA14_23890	2907.56	0.267612	0.0678719	3.9429	8.05006e-05	0.000380335
PA14_23900	2401.63	0.132928	0.0561765	2.36625	0.0179692	0.0554904
PA14_23920	2225.66	-0.0799167	0.0629324	-1.26988	0.204127	0.383726
PA14_23930	212.488	0.0220634	0.167855	0.131443	0.895425	0.948539
PA14_23950	5846.98	0.143013	0.0451097	3.17033	0.00152266	0.00592679
PA14_23970	716.078	-0.119398	0.0812364	-1.46976	0.141628	0.296462
PA14_23980	586.593	0.131256	0.0803561	1.63343	0.102379	0.233123
PA14_23990	12.3895	-0.112656	0.532214	-0.211674	0.832361	0.916259
PA14_24010	301.321	0.0279681	0.0964566	0.289956	0.77185	0.886684
PA14_24020	11.5476	-0.502439	0.482149	-1.04208	0.297373	0.501614
PA14_24040	297.305	0.611923	0.128259	4.77098	1.83335e-06	1.02881e-05
PA14_24050	501.036	-0.223283	0.099134	-2.25234	0.0243008	0.0720648
PA14_24060	447.983	-0.554858	0.0859081	-6.45873	1.05582e-10	8.18008e-10
PA14_24070	465.726	-0.184863	0.0883476	-2.09245	0.0363982	0.10113
PA14_24080	1077.1	0.181715	0.0657892	2.76209	0.00574334	0.0200593
PA14_24100	1264.14	-0.00397517	0.0602821	-0.0659427	0.947423	0.975192
PA14_24140	914.986	0.108202	0.0724356	1.49377	0.135237	0.286217
PA14_24150	868.419	0.969268	0.0704091	13.7662	4.06867e-43	8.75227e-42
PA14_24170	9.66373	-5.81476	1.11603	-5.21022	1.88617e-07	1.16178e-06
PA14_24180	204.826	-0.0184978	0.124423	-0.148669	0.881815	0.94079
PA14_24190	70.5447	0.100824	0.229996	0.438373	0.661116	0.818147
PA14_24210	2829.36	-0.014966	0.0532488	-0.281058	0.778666	0.889032
PA14_24220	0.319793	-1.66072	2.79426	-0.594333	0.552289	0.741478
PA14_24230	1961.98	0.916917	0.0593006	15.4622	6.24404e-54	1.69665e-52
PA14_24240	764.452	0.0175085	0.0717893	0.243888	0.807318	0.900819
PA14_24245	408.732	0.180387	0.0934782	1.92972	0.0536414	0.13872
PA14_24260	860.152	0.0792578	0.0630763	1.25654	0.208921	0.390027
PA14_24270	1468.93	0.0256387	0.0581917	0.440591	0.659509	0.816693
PA14_24290	619.558	-0.0814992	0.0720035	-1.13188	0.257685	0.453683
PA14_24300	1122.64	-0.00118922	0.0592571	-0.0200688	0.983988	0.992905
PA14_24310	1675.55	1.3973	0.0786619	17.7634	1.3577e-70	4.97445e-69
PA14_24330	1130.26	0.0779055	0.0666483	1.1689	0.242442	0.435292
PA14_24340	158.899	-0.0192116	0.150868	-0.12734	0.898671	0.950205
PA14_24350	199.143	0.0485009	0.115712	0.419151	0.675105	0.827347
PA14_24360	634.081	-0.0291236	0.0803965	-0.36225	0.717165	0.855066
PA14_24370	1164.15	0.430506	0.0641107	6.71505	1.88004e-11	1.51443e-10
PA14_24380	973.175	0.292672	0.074511	3.9279	8.56919e-05	0.000403854
PA14_24410	636.424	0.0669947	0.0812509	0.824541	0.409632	0.617876
PA14_24420	211.501	-0.420448	0.175765	-2.3921	0.0167522	0.0520438
PA14_24430	2667.63	0.0611806	0.0472512	1.29479	0.195392	0.371194
PA14_24440	488.794	0.0878028	0.0994081	0.883256	0.377098	0.588982
PA14_24445	479.11	-0.376425	0.100037	-3.76288	0.000167969	0.000761896
PA14_24480	1535.23	-0.0367537	0.091001	-0.403882	0.686299	0.834333
PA14_24490	631.682	-0.0160208	0.076375	-0.209764	0.833852	0.916977
PA14_24500	82.2564	-0.0897636	0.183429	-0.489365	0.624583	0.79387
PA14_24510	580.406	-0.104203	0.0733931	-1.41979	0.155669	0.31528
PA14_24530	1537.61	0.905065	0.0590196	15.335	4.4633e-53	1.188e-51
PA14_24550	471.965	0.0514276	0.0871413	0.590163	0.555081	0.744171
PA14_24560	612.071	-0.184657	0.087667	-2.10635	0.0351739	0.0984973
PA14_24570	384.692	-0.152832	0.0957532	-1.5961	0.110467	0.246596
PA14_24580	1450.54	0.252247	0.105317	2.39512	0.0166148	0.05173
PA14_24590	1399.56	0.541541	0.0617652	8.76773	1.82307e-18	2.07064e-17
PA14_24600	122.139	-1.97491	0.165633	-11.9234	8.93458e-33	1.51915e-31
PA14_24610	135.983	-0.207515	0.158231	-1.31147	0.1897	0.363096
PA14_24620	1049.53	0.0925273	0.0591813	1.56345	0.117946	0.258531
PA14_24630	866.151	0.125078	0.0719463	1.7385	0.0821233	0.195425
PA14_24640	199.805	-1.71167	0.135392	-12.6423	1.23361e-36	2.29694e-35
PA14_24650	394.536	-0.0467933	0.0886323	-0.527949	0.597535	0.776911
PA14_24665	261.623	-0.0479272	0.109763	-0.436643	0.66237	0.819164
PA14_24675	846.985	0.221219	0.0704815	3.13868	0.00169712	0.00656983
PA14_24690	401.892	-0.0256963	0.0998962	-0.25723	0.797001	0.895868
PA14_24700	246.951	-5.75268	0.263183	-21.8581	6.50659e-106	4.34717e-104
PA14_24710	2015.06	0.175075	0.0664175	2.63597	0.00838965	0.0281922
PA14_24720	1587.66	0.660123	0.0813162	8.11797	4.74048e-16	4.76481e-15
PA14_24730	469.122	0.61082	0.115726	5.27817	1.30483e-07	8.16093e-07
PA14_24740	156.061	-0.156305	0.135988	-1.1494	0.25039	0.446036
PA14_24760	1.43562	-1.03673	1.3643	-0.759898	0.447315	0.653095
PA14_24770	566.489	-0.0870638	0.0810641	-1.07401	0.282817	0.48403
PA14_24780	506.916	0.126102	0.0862532	1.462	0.14374	0.299012
PA14_24790	9.96325	-1.29741	0.585454	-2.21607	0.0266865	0.0782005
PA14_24810	63.4248	-0.412674	0.204829	-2.01473	0.0439334	0.118294
PA14_24820	490.296	0.261115	0.0769804	3.39196	0.000693943	0.00286588
PA14_24840	691.356	0.0692236	0.0742932	0.931762	0.351459	0.562553
PA14_24850	439.848	-0.0483894	0.0841136	-0.575286	0.565098	0.752271
PA14_24860	26.628	-0.0228073	0.333018	-0.0684868	0.945398	0.974395
PA14_24880	377.75	0.550222	0.0884717	6.21919	4.99725e-10	3.71458e-09
PA14_24890	103.893	-0.156168	0.160254	-0.9745	0.329808	0.537595
PA14_24900	195.488	-0.245501	0.151117	-1.62458	0.104253	0.236159
PA14_24920	1389.3	-0.000807099	0.0627623	-0.0128596	0.98974	0.994998
PA14_24940	566.415	0.047858	0.0913696	0.523785	0.600428	0.779034
PA14_24950	332.215	0.0146105	0.108146	0.1351	0.892533	0.946787
PA14_24960	857.335	-0.094422	0.0751062	-1.25718	0.208688	0.389721
PA14_24970	1082.53	-0.199393	0.070302	-2.83623	0.00456493	0.0163663
PA14_24980	809.126	0.429326	0.0879775	4.87995	1.06114e-06	6.11799e-06
PA14_24990	38.0685	0.0964217	0.244633	0.394149	0.693471	0.837741
PA14_25000	1030.51	0.0888925	0.0677273	1.31251	0.18935	0.362848
PA14_25020	1173.07	0.0858379	0.070165	1.22337	0.221189	0.407042
PA14_25030	52.7248	0.359404	0.227477	1.57996	0.114117	0.252437
PA14_25040	2026.53	0.241085	0.0664586	3.62759	0.000286079	0.00126039
PA14_25050	407.115	-1.77719	0.100722	-17.6445	1.12069e-69	4.00275e-68
PA14_25060	772.278	0.144096	0.0692083	2.08205	0.0373375	0.103208
PA14_25080	7897.01	-0.251335	0.0472934	-5.31437	1.07026e-07	6.75334e-07
PA14_25090	2087.97	-0.062751	0.0606139	-1.03526	0.300548	0.505102
PA14_25100	417.818	-0.084414	0.0841589	-1.00303	0.315846	0.522733
PA14_25110	320.88	-0.46807	0.106494	-4.39526	1.1064e-05	5.76976e-05
PA14_25140	15915.4	-0.233266	0.0491214	-4.74878	2.0465e-06	1.14278e-05
PA14_25150	91.388	-0.0972232	0.170865	-0.569007	0.569351	0.756412
PA14_25160	10.6187	-0.208588	0.513691	-0.406059	0.6847	0.832992
PA14_25180	455.145	-0.433455	0.101549	-4.26842	1.96864e-05	9.95538e-05
PA14_25195	829.081	-0.0457653	0.0877037	-0.521817	0.601798	0.779749
PA14_25210	202.869	0.316742	0.124049	2.55336	0.0106688	0.0348009
PA14_25220	12.1261	-1.22305	0.496422	-2.46373	0.0137501	0.0438444
PA14_25230	564.102	-0.27997	0.0939613	-2.97963	0.00288595	0.0107881
PA14_25250	335.542	-0.915428	0.115265	-7.94194	1.99042e-15	1.95226e-14
PA14_25270	536.908	-0.0502714	0.0833177	-0.603371	0.546262	0.736619
PA14_25280	74.3105	-0.406528	0.204937	-1.98367	0.0472927	0.125229
PA14_25305	280.021	-0.0783401	0.099358	-0.788463	0.430426	0.637555
PA14_25320	208.621	-0.169094	0.113743	-1.48664	0.137111	0.289355
PA14_25330	279.496	-0.397599	0.102135	-3.89288	9.90615e-05	0.000463784
PA14_25340	536.945	-0.141291	0.0735891	-1.92001	0.0548571	0.140838
PA14_25350	37.1377	-0.0430788	0.249773	-0.172472	0.863067	0.932171
PA14_25360	48.0758	-0.236107	0.229134	-1.03043	0.302806	0.507717
PA14_25370	167.756	0.0132047	0.12784	0.103291	0.917732	0.958889
PA14_25390	253.929	-3.22623	0.139787	-23.0797	7.40509e-118	5.76075e-116
PA14_25400	303.236	-0.575419	0.0970883	-5.92675	3.0898e-09	2.1879e-08
[truncated: 3,726 more rows]

## Sheet: set2-G7
	baseMean	log2FoldChange	lfcSE	stat	pvalue	padj
[truncated: 5,849 more rows]

[truncated: 2 more sheets: set2-G14, set2-G21]
