# Supplementary material for: Genome-wide CRISPRi-seq identified ferredoxin-NADP reductase FprB as a synergistic target for gallium therapy in Pseudomonas aeruginosa
Source: bioRxiv preprint, doi:10.1101/2024.09.01.610675, version 1 (2024-09-01)
Supplement: Supplementary Table S6 [file 610675_file07.xlsx]

## Sheet: Sheet 1
PA14_ID	new_tag	operon	set1	set2	This study essential gene	cluster	set	Gene Name	Product Name	7g baseMean	g7 log2FoldChage	14g baseMean	g14 log2FoldChage	21g baseMean	g21 log2FoldChage	COG	COG_level1_name	Tn-seq by Liberati et al., 2006	Tn-seg by Skurnik et al., 2013	Tn-seg by Poulsen et al., 2019 [PA14, LB, FWER]	Essential Category	Genes_in_TU [Wurtzel et al., 2012]	Nr_of_genes_in_TU	Genes_Products	Gene_homologs_in_PAO1	In_Operon_With_Core_Or_Conditional
PA14_13030	PA14_RS05245	operon_1	0	0	non essential gene	C5	set2	cioA	CioA, cyanide insensitive terminal oxidase	64.6788	-0.340388	74.7514	0.0132287	113.087	0.0840088	COG1271	[C] Energy production and conversion					PA14_13030, PA14_13040, PA14_13050	3	CioA, cyanide insensitive, CioB, cyanide insensitive, hypothetical protein	PA3930, PA3929, PA3928	No
PA14_13040	PA14_RS05250	operon_1	1	1	non essential gene	C5	set2	cioB	CioB, cyanide insensitive terminal oxidase	377.559	0.0472328	360.638	-0.107382	722.144	-0.191071	COG1294	[C] Energy production and conversion					PA14_13030, PA14_13040, PA14_13050	3	CioA, cyanide insensitive, CioB, cyanide insensitive, hypothetical protein	PA3930, PA3929, PA3928	No
PA14_19640	PA14_RS07865	operon_10	0	1	non essential gene	C5	set2		short chain dehydrogenase	1098.01	0.0280929	1114.98	0.158217	1312.82	0.214639	COG1028	[I] Lipid transport and metabolism					PA14_19640	1	short chain dehydrogenase	PA3437	No
PA14_19640	PA14_RS07865	operon_10	0	1	non essential gene	C5	set2		short chain dehydrogenase	1098.01	0.0280929	1114.98	0.158217	1312.82	0.214639	COG1028	[Q] Secondary metabolites biosynthesis, transport and catabolism					PA14_19640	1	short chain dehydrogenase	PA3437	No
PA14_17960	PA14_RS07215	operon_100	1	0	non essential gene	C5	set2	glpK	glycerol kinase	35.3364	-0.00414704	36.3938	-0.100725	53.256	0.10213	COG0554	[F] Nucleotide transport and metabolism					PA14_17960, PA14_17980	2	glycerol kinase, glycerol uptake facilitator	PA3582, PA3581	No
PA14_17980	PA14_RS07220	operon_100	0	0	essential gene	C4	set2	glpF	glycerol uptake facilitator protein	8.2689	-0.278714	9.97318	-0.753661	21.5297	-1.18278	COG0580	[U] Intracellular trafficking, secretion, and vesicular transport					PA14_17960, PA14_17980	2	glycerol kinase, glycerol uptake facilitator	PA3582, PA3581	No
PA14_65010	PA14_RS26585	operon_1000	1	1	non essential gene	C5	set2		hypothetical protein	158.403	-0.0191517	147.905	-0.17252	266.655	-0.218135	COG1611	[S] Function unknown					PA14_65010	1	hypothetical protein	PA4923	No
PA14_16920	PA14_RS06785	operon_1001	0	1	non essential gene	C5	set2		hypothetical protein	394.648	-0.166034	364.576	-0.140496	446.489	-0.176445	COG2166	[S] Function unknown	essential gene	essential gene			PA14_16920, PA14_16930	2	hypothetical protein, putative pyridoxal-phosphate dependent	PA3668, PA3667	No
PA14_49380	PA14_RS20060	operon_1002	0	1	non essential gene	C5	set2	dapE	succinyl-diaminopimelate desuccinylase	952.452	0.155031	936.75	0.20431	2038.88	0.219594	COG0624	[E] Amino acid transport and metabolism				Core	PA14_49380, PA14_49390	2	succinyl-diaminopimelate desuccinylase, rRNA methyltransferase	PA1162, PA1161	Yes
PA14_32890	PA14_RS13420	operon_1004	1	0	non essential gene	C5	set2		hypothetical protein	64.2003	-0.285617	60.285	-0.647597	72.0695	-0.608132	2EJ2P	[S] Function unknown					PA14_32860, PA14_32880, PA14_32890	3	hypothetical protein, hypothetical protein, hypothetical protein	PA2455, PA2454, PA2453	No
PA14_72900	PA14_RS29675	operon_1005	0	1	non essential gene	C5	set2		lipoprotein	908.155	0.152443	994.577	0.476762	1398.12	0.702694	2AMN6	[M] Cell wall/membrane/envelope biogenesis					PA14_72900	1	putative lipoprotein	PA5526	No
PA14_42460	PA14_RS17230	operon_1006	0	1	non essential gene	C5	set2	pcrH	regulatory protein PcrH	131.356	-0.190877	122.122	0.0308125	285.489	-0.0250418	COG0457	[S] Function unknown					PA14_42440, PA14_42450, PA14_42460, PA14_42470, PA14_42480, PA14_42490, PA14_42500, PA14_42510, PA14_42520, PA14_42530, PA14_42540, PA14_42550	12	translocator outer membrane, translocator protein PopB, regulatory protein PcrH, type III secretion, regulator in type, transcriptional regulator protein, type III secretory, hypothetical protein, hypothetical protein, putative type III, putative protein in, Type III secretion	PA1709, PA1708, PA1707, PA1706, PA1705, PA1704, PA1703, PA1702, PA1701, PA1700, PA1699, PA1698	No
PA14_39520	PA14_RS16015	operon_1007	1	1	non essential gene	C5	set2		hydroxylase large subunit	239.598	-0.0855947	212.441	-0.0549424	491.026	-0.187231	COG1529	[C] Energy production and conversion					PA14_39520, PA14_39530, PA14_39540, PA14_39560	4	putative hydroxylase large, putative hydroxylase molybdopterin-containing, putative ferredoxin, putative chemotaxis transducer	PA1933, PA1932, PA1931, PA1930	No
PA14_39530	PA14_RS16020	operon_1007	1	1	non essential gene	C5	set2		hydroxylase molybdopterin-containing subunit	163.701	-0.238056	161.097	-0.277855	304.892	-0.258801	COG1319	[C] Energy production and conversion					PA14_39520, PA14_39530, PA14_39540, PA14_39560	4	putative hydroxylase large, putative hydroxylase molybdopterin-containing, putative ferredoxin, putative chemotaxis transducer	PA1933, PA1932, PA1931, PA1930	No
PA14_39540	PA14_RS16025	operon_1007	1	0	non essential gene	C5	set2		ferredoxin	146.971	0.16226	141.794	0.200616	172.388	0.138156	COG2080	[C] Energy production and conversion	essential gene				PA14_39520, PA14_39530, PA14_39540, PA14_39560	4	putative hydroxylase large, putative hydroxylase molybdopterin-containing, putative ferredoxin, putative chemotaxis transducer	PA1933, PA1932, PA1931, PA1930	No
PA14_02070	PA14_RS00850	operon_1009	1	1	non essential gene	C5	set2		transporter	174.969	-0.223547	176.773	-0.258472	334.056	-0.358802	COG2233	[F] Nucleotide transport and metabolism					PA14_02070	1	putative transporter	PA0166	No
PA14_23720	PA14_RS09615	operon_101	1	0	non essential gene	C5	set2		translation initiation inhibitor	71.4538	0.320514	73.6634	0.304628	175.572	0.292899	COG0251	[J] Translation, ribosomal structure and biogenesis					PA14_23720	1	putative translation initiation	PA3123	No
PA14_04610	PA14_RS01870	operon_1010	1	1	non essential gene	C5	set2		transporter	440.556	0.0989559	437.182	0.179925	709.046	0.314166	COG2233	[F] Nucleotide transport and metabolism					PA14_04610	1	putative transporter	PA0352	No
PA14_44950	PA14_RS18270	operon_1012	1	1	non essential gene	C5	set2		transporter	325.704	-0.114848	309.166	0.194833	718.08	0.385296	COG2233	[F] Nucleotide transport and metabolism					PA14_44950	1	putative transporter	PA1507	No
PA14_61480	PA14_RS25120	operon_1013	1	1	non essential gene	C5	set2	uraA	uracil permease	654.35	0.192278	652.789	0.204811	1632.59	0.35589	COG2233	[F] Nucleotide transport and metabolism					PA14_61470, PA14_61480	2	uracil phosphoribosyltransferase, uracil permease	PA4646, PA4647	No
PA14_64010	PA14_RS26170	operon_1019	1	1	essential gene	C3	set1		hypothetical protein	11523.2	-2.19125	7097	-3.06393	2574.05	-2.72403	COG0494	[L] Replication, recombination and repair					PA14_64000, PA14_64010, PA14_64030	3	translation initiation factor, hypothetical protein, hypothetical protein	PA4840, PA4841, PA4842	No
PA14_70480	PA14_RS28705	operon_102	1	1	non essential gene	C5	set2		hypothetical protein	543.637	-0.139678	531.237	-0.118065	652.561	-0.189396	COG0251	[J] Translation, ribosomal structure and biogenesis					PA14_70480, PA14_70490	2	hypothetical protein, putative lipoprotein	PA5339, PA5340	No
PA14_19660	PA14_RS07875	operon_1020	0	1	non essential gene	C5	set2		flavodoxin	817.028	0.014807	809.905	-0.0802962	1328.58	-0.162823	COG0716	[C] Energy production and conversion					PA14_19660	1	flavodoxin	PA3435	No
PA14_54480	PA14_RS22170	operon_1021	0	1	essential gene	C2	set2		hypothetical protein	163.251	-1.21012	130.496	-3.52386	246.841	-6.00884	COG0354	[S] Function unknown	essential gene		essential gene	Core	PA14_54480	1	hypothetical protein	PA0759	Yes
PA14_69030	PA14_RS28140	operon_1022	0	1	non essential gene	C5	set2		hypothetical protein	573.947	0.0244234	547.405	0.0399913	1000.35	-0.0172527	COG3027	[D] Cell cycle control, cell division, chromosome partitioning					PA14_69020, PA14_69030	2	hypothetical protein, hypothetical protein	PA5226, PA5227	No
PA14_56740	PA14_RS23125	operon_1023	1	1	non essential gene	C5	set2	iciA	chromosome replication initiation inhibitor protein	389.203	0.000742027	344.77	0.0142665	696.555	0.0802334	COG0583	[K] Transcription					PA14_56740	1	chromosome replication initiation	PA4363	No
PA14_07090	PA14_RS02850	operon_1025	1	1	non essential gene	C5	set2	metK	S-adenosylmethionine synthetase	596.048	0.0251834	559.181	-0.149157	1248.93	-0.115608	COG0192	[H] Coenzyme transport and metabolism		essential gene	essential gene	Core	PA14_07090	1	S-adenosylmethionine synthetase	PA0546	Yes
PA14_05280	PA14_RS02145	operon_1026	1	0	essential gene	C4	set2	yqgF	Holliday junction resolvase-like protein	68.0104	-0.109983	59.4893	-0.631452	110.382	-1.59064	COG0816	[L] Replication, recombination and repair	essential gene	essential gene	essential gene	Core	PA14_05280, PA14_05290	2	Holliday junction resolvase-like, hypothetical protein	PA0404, PA0405	Yes
PA14_05290	PA14_RS02150	operon_1026	1	1	essential gene	C3	set1		hypothetical protein	520.379	-1.73885	243.358	-3.07117	163.07	-3.35378	COG1678	[K] Transcription		essential gene			PA14_05280, PA14_05290	2	Holliday junction resolvase-like, hypothetical protein	PA0404, PA0405	Yes
PA14_37760	PA14_RS15355	operon_1027	1	1	non essential gene	C5	set2		MFS transporter	487.529	-0.00685725	509.35	0.0620726	918.389	0.148759	COG0477	[E] Amino acid transport and metabolism					PA14_37745, PA14_37760, PA14_37770, PA14_37780	4	carbamoyl transferase, putative MFS transporter, putative hydrolase, hypothetical protein	PA2069, PA2068, PA2067, PA2066	No
PA14_37760	PA14_RS15355	operon_1027	1	1	non essential gene	C5	set2		MFS transporter	487.529	-0.00685725	509.35	0.0620726	918.389	0.148759	COG0477	[G] Carbohydrate transport and metabolism					PA14_37745, PA14_37760, PA14_37770, PA14_37780	4	carbamoyl transferase, putative MFS transporter, putative hydrolase, hypothetical protein	PA2069, PA2068, PA2067, PA2066	No
PA14_37760	PA14_RS15355	operon_1027	1	1	non essential gene	C5	set2		MFS transporter	487.529	-0.00685725	509.35	0.0620726	918.389	0.148759	COG0477	[P] Inorganic ion transport and metabolism					PA14_37745, PA14_37760, PA14_37770, PA14_37780	4	carbamoyl transferase, putative MFS transporter, putative hydrolase, hypothetical protein	PA2069, PA2068, PA2067, PA2066	No
PA14_42750	PA14_RS17360	operon_1028	0	1	non essential gene	C5	set2		MFS metabolite transporter	761.347	-0.121589	689.905	-0.138001	862.509	-0.198937	COG0477	[E] Amino acid transport and metabolism					PA14_42750	1	putative MFS metabolite	PA1682	No
PA14_42750	PA14_RS17360	operon_1028	0	1	non essential gene	C5	set2		MFS metabolite transporter	761.347	-0.121589	689.905	-0.138001	862.509	-0.198937	COG0477	[G] Carbohydrate transport and metabolism					PA14_42750	1	putative MFS metabolite	PA1682	No
PA14_42750	PA14_RS17360	operon_1028	0	1	non essential gene	C5	set2		MFS metabolite transporter	761.347	-0.121589	689.905	-0.138001	862.509	-0.198937	COG0477	[P] Inorganic ion transport and metabolism					PA14_42750	1	putative MFS metabolite	PA1682	No
PA14_71200	PA14_RS28995	operon_103	1	0	non essential gene	C5	set2		YjgF family translation initiation inhibitor	170.116	-0.103408	163.523	-0.272433	217.613	-0.193756	COG0251	[J] Translation, ribosomal structure and biogenesis					PA14_71190, PA14_71200, PA14_71210	3	hypothetical protein, YjgF family translation, hypothetical protein	PA5391, PA5392, PA5393	No
PA14_09195	PA14_RS03730	operon_104	1	1	non essential gene	C5	set2		major facilitator transporter	151.695	-0.137101	138.122	-0.23749	268.381	-0.154863	COG0477	[E] Amino acid transport and metabolism					PA14_09195	1	major facilitator transporter	PA4233	No
PA14_09195	PA14_RS03730	operon_104	1	1	non essential gene	C5	set2		major facilitator transporter	151.695	-0.137101	138.122	-0.23749	268.381	-0.154863	COG0477	[G] Carbohydrate transport and metabolism					PA14_09195	1	major facilitator transporter	PA4233	No
PA14_09195	PA14_RS03730	operon_104	1	1	non essential gene	C5	set2		major facilitator transporter	151.695	-0.137101	138.122	-0.23749	268.381	-0.154863	COG0477	[P] Inorganic ion transport and metabolism					PA14_09195	1	major facilitator transporter	PA4233	No
PA14_15480	PA14_RS06185	operon_105	0	1	non essential gene	C5	set2	merR	transcriptional regulator MerR	10440.1	-0.0072552	10258.1	-0.225295	12275.8	-0.277706	COG0789	[K] Transcription					PA14_15480	1	NA	NA	No
PA14_05230	PA14_RS02125	operon_1054	1	1	non essential gene	C5	set2		cystathionine gamma-lyase	573.513	-0.103729	565.093	-0.00901867	672.609	0.091266	COG0626	[E] Amino acid transport and metabolism					PA14_05220, PA14_05230	2	cystathionine beta-synthase, cystathionine gamma-lyase	PA0399, PA0400	No
PA14_66440	PA14_RS27110	operon_1055	0	1	non essential gene	C5	set2	metY	O-acetylhomoserine aminocarboxypropyltransferase	293.946	0.00226524	301.689	0.0745167	383.695	0.215226	COG2873	[E] Amino acid transport and metabolism					PA14_66440, PA14_66450	2	O-acetylhomoserine, hypothetical protein	PA5025, PA5026	No
PA14_11720	PA14_RS04745	operon_1056	1	1	non essential gene	C5	set2		hypothetical protein	704.652	0.000997775	661.293	-0.127375	830.087	-0.0369902	COG0586	[S] Function unknown					PA14_11700, PA14_11720	2	hypothetical protein, hypothetical protein	PA4030, PA4029	No
PA14_32570	PA14_RS13280	operon_1058	1	1	essential gene	C2	set2		two-component sensor	109.649	-1.61824	86.2192	-3.8471	161.739	-6.7075	COG0642	[T] Signal transduction mechanisms		essential gene			PA14_32570, PA14_32580	2	two-component sensor, two-component response regulator	PA2480, PA2479	No
PA14_22560	PA14_RS09140	operon_106	0	1	non essential gene	C5	set2		permease	304.634	-0.153776	301.272	-0.0804533	357.817	-0.236693	COG0697	[E] Amino acid transport and metabolism					PA14_22560, PA14_22570	2	putative permease, CsaA protein	PA3222, PA3221	No
PA14_22560	PA14_RS09140	operon_106	0	1	non essential gene	C5	set2		permease	304.634	-0.153776	301.272	-0.0804533	357.817	-0.236693	COG0697	[G] Carbohydrate transport and metabolism					PA14_22560, PA14_22570	2	putative permease, CsaA protein	PA3222, PA3221	No
PA14_57990	PA14_RS23650	operon_1063	1	1	non essential gene	C5	set2		hypothetical protein	585.964	0.318184	633.89	0.370431	828.873	0.550847	COG0428	[P] Inorganic ion transport and metabolism					PA14_57990, PA14_58000, PA14_58010, PA14_58030, PA14_58040	5	hypothetical protein, superoxide dismutase, hypothetical protein, NA, hypothetical protein	PA4467, PA4468, PA4469, NA, PA4471	No
PA14_69820	PA14_RS28460	operon_1064	0	0	essential gene	C4	set2		hypothetical protein	68.0045	-0.583738	45.5935	-1.95213	54.2442	-3.84747	COG2960	[S] Function unknown		essential gene			PA14_69820	1	hypothetical protein	PA5289	No
PA14_11080	PA14_RS04470	operon_1065	1	0	non essential gene	C5	set2	cupB3	usher CupB3	76.8854	0.0292514	75.5355	-0.0368677	100.176	-0.214425	COG3188	[N] Cell motility					PA14_11080, PA14_11090	2	usher CupB3, chaperone CupB4	PA4084, PA4083	Yes
PA14_11080	PA14_RS04470	operon_1065	1	0	non essential gene	C5	set2	cupB3	usher CupB3	76.8854	0.0292514	75.5355	-0.0368677	100.176	-0.214425	COG3188	[U] Intracellular trafficking, secretion, and vesicular transport					PA14_11080, PA14_11090	2	usher CupB3, chaperone CupB4	PA4084, PA4083	Yes
PA14_37030	PA14_RS15075	operon_1066	1	1	non essential gene	C5	set2	cupA3	usher	1617.26	-0.0346323	1700.39	0.123905	2168.72	0.140235	COG3188	[U] Intracellular trafficking, secretion, and vesicular transport					PA14_36990, PA14_37000, PA14_37010, PA14_37030, PA14_37040, PA14_37060	6	EAL domain-containing protein, chaperone CupA5, fimbrial subunit CupA4, usher, chaperone CupA2, fimbrial subunit CupA1	PA2133, PA2132, PA2131, PA2130, PA2129, PA2128	No
PA14_37030	PA14_RS15075	operon_1066	1	1	non essential gene	C5	set2	cupA3	usher	1617.26	-0.0346323	1700.39	0.123905	2168.72	0.140235	COG3188	[N] Cell motility					PA14_36990, PA14_37000, PA14_37010, PA14_37030, PA14_37040, PA14_37060	6	EAL domain-containing protein, chaperone CupA5, fimbrial subunit CupA4, usher, chaperone CupA2, fimbrial subunit CupA1	PA2133, PA2132, PA2131, PA2130, PA2129, PA2128	No
PA14_51450	PA14_RS20920	operon_1067	1	1	non essential gene	C5	set2	cupC3	usher CupC3	492.757	0.0717925	497.413	0.132438	1048.65	0.266554	COG3188	[N] Cell motility					PA14_51450, PA14_51460, PA14_51470	3	usher CupC3, chaperone CupC, fimbrial subunit CupC1	PA0994, PA0993, PA0992	No
PA14_51450	PA14_RS20920	operon_1067	1	1	non essential gene	C5	set2	cupC3	usher CupC3	492.757	0.0717925	497.413	0.132438	1048.65	0.266554	COG3188	[U] Intracellular trafficking, secretion, and vesicular transport					PA14_51450, PA14_51460, PA14_51470	3	usher CupC3, chaperone CupC, fimbrial subunit CupC1	PA0994, PA0993, PA0992	No
PA14_61540	PA14_RS25145	operon_1068	1	1	non essential gene	C5	set2		hypothetical protein	625.639	-0.046538	621.65	-0.0455966	746.304	-0.112959	COG3188	[N] Cell motility					PA14_61500, PA14_61510, PA14_61520, PA14_61530, PA14_61540, PA14_61550	6	hypothetical protein, hypothetical protein, hypothetical protein, putative pili assembly, hypothetical protein, hypothetical protein	PA4648, PA4649, PA4650, PA4651, PA4652, PA4653	No
PA14_61540	PA14_RS25145	operon_1068	1	1	non essential gene	C5	set2		hypothetical protein	625.639	-0.046538	621.65	-0.0455966	746.304	-0.112959	COG3188	[U] Intracellular trafficking, secretion, and vesicular transport					PA14_61500, PA14_61510, PA14_61520, PA14_61530, PA14_61540, PA14_61550	6	hypothetical protein, hypothetical protein, hypothetical protein, putative pili assembly, hypothetical protein, hypothetical protein	PA4648, PA4649, PA4650, PA4651, PA4652, PA4653	No
PA14_07620	PA14_RS03050	operon_1069	1	0	non essential gene	C5	set2	cca	multifunctional tRNA nucleotidyl transferase/2'3'-cyclic phosphodiesterase/2'nucleotidase/phosphatase	50.7152	-0.091188	43.9284	-0.555128	63.7422	-0.570643	COG0617	[F] Nucleotide transport and metabolism				Conditional	PA14_07620, PA14_07630	2	ion of Pi,, hypothetical protein	PA0584, PA0585	Yes
PA14_30790	PA14_RS12560	operon_107	1	1	non essential gene	C5	set2		hypothetical protein	448.165	0.204119	477.358	0.189076	875.163	0.461233	COG0697	[E] Amino acid transport and metabolism					PA14_30790	1	hypothetical protein	PA2576	No
PA14_30790	PA14_RS12560	operon_107	1	1	non essential gene	C5	set2		hypothetical protein	448.165	0.204119	477.358	0.189076	875.163	0.461233	COG0697	[G] Carbohydrate transport and metabolism					PA14_30790	1	hypothetical protein	PA2576	No
PA14_07580	PA14_RS03035	operon_1070	1	1	non essential gene	C5	set2		glycerol-3-phosphate acyltransferase PlsY	337.817	-0.323952	323.716	-0.34401	494.805	-0.634575	COG0344	[I] Lipid transport and metabolism					PA14_07580	1	putative glycerol-3-phosphate acyltransferase	PA0581	No
PA14_04930	PA14_RS02000	operon_1071	0	0	non essential gene	C5	set2	rpoH	RNA polymerase factor sigma-32	7.43505	-0.256377	14.9867	0.584635	15.7575	0.880107	COG0568	[K] Transcription			essential gene	Core	PA14_04930	1	RNA polymerase factor	PA0376	Yes
PA14_45630	PA14_RS18530	operon_1072	1	1	essential gene	C4	set2	fliA	flagellar biosynthesis sigma factor	688.606	-0.414568	604.917	-1.16164	617.407	-1.95474	COG1191	[K] Transcription					PA14_45480, PA14_45500, PA14_45510, PA14_45520, PA14_45540, PA14_45560, PA14_45580, PA14_45590, PA14_45610, PA14_45620, PA14_45630, PA14_45640	12	hypothetical protein, putative purine-binding chemotaxis, CheW domain-containing protein, putative plasmid partitioning, flagellar motor protein, flagellar motor protein, chemotaxis-specific methylesterase, putative two-component sensor, chemotaxis protein CheZ, two-component response regulator, flagellar biosynthesis sigma, flagellar synthesis regulator	PA1465, PA1464, PA1463, PA1462, PA1461, PA1460, PA1459, PA1458, PA1457, PA1456, PA1455, PA1454	No
PA14_01620	PA14_RS00670	operon_1073	1	1	non essential gene	C5	set2	aptA	beta alanine--pyruvate transaminase	1401.09	-0.0604251	1347.59	-0.0777489	3390.12	-0.113775	COG0161	[E] Amino acid transport and metabolism					PA14_01610, PA14_01620	2	hypothetical protein, beta alanine--pyruvate transaminase	PA0131, PA0132	No
PA14_02700	PA14_RS01090	operon_1074	1	0	non essential gene	C5	set2		aminotransferase	75.1259	-0.164079	72.4218	-0.169206	110.402	-0.258195	COG0161	[H] Coenzyme transport and metabolism					PA14_02680, PA14_02690, PA14_02700, PA14_02720	4	putative aldehyde dehydrogenase, putative amino acid, putative aminotransferase, hypothetical protein	PA0219, PA0220, PA0221, PA0222	No
PA14_03450	PA14_RS01430	operon_1075	1	1	non essential gene	C5	set2	gabT	4-aminobutyrate aminotransferase	198.34	0.231696	216.569	0.363216	284.551	0.420646	COG0160	[E] Amino acid transport and metabolism					PA14_03450	1	4-aminobutyrate aminotransferase	PA0266	No
PA14_03900	PA14_RS01595	operon_1076	0	1	essential gene	C3	set2	spuC	aminotransferase	476.205	-1.19814	364.862	-1.72624	635.352	-2.25951	COG0161	[E] Amino acid transport and metabolism					PA14_03900	1	putative aminotransferase	PA0299	No
PA14_05460	PA14_RS02225	operon_1077	1	1	non essential gene	C5	set2	bioA	adenosylmethionine-8-amino-7-oxononanoate aminotransferase	2770.41	-0.30469	2527.13	-0.566807	3655.62	-0.918998	COG0161	[H] Coenzyme transport and metabolism			essential gene	Conditional	PA14_05440, PA14_05450, PA14_05460	3	hypothetical protein, 16S ribosomal RNA, adenosylmethionine--8-amino-7-oxononanoate	PA0418, PA0419, PA0420	Yes
PA14_06920	PA14_RS02770	operon_1078	1	1	non essential gene	C5	set2		class III pyridoxal phosphate-dependent aminotransferase	528.212	-0.13507	528.475	-0.19708	593.447	-0.185191	COG4992	[E] Amino acid transport and metabolism					PA14_06890, PA14_06900, PA14_06920, PA14_06930	4	hypothetical protein, NA, putative class III, putative glutamine amidotransferase	PA0529, NA, PA0530, PA0531	No
PA14_11030	PA14_RS04450	operon_1079	1	1	non essential gene	C5	set2		aminotransferase	276.057	0.0282131	287.146	-0.170137	519.923	-0.209578	COG0001	[E] Amino acid transport and metabolism					PA14_11020, PA14_11030, PA14_11050	3	3-ketoacyl-(acyl-carrier-protein) reductase, aminotransferase, hypothetical protein	PA4089, PA4088, PA4087	No
PA14_35770	PA14_RS14545	operon_108	1	0	non essential gene	C5	set2		hypothetical protein	4.9476	-0.0647146	6.71406	0.333533	11.8141	-0.591831					essential gene		PA14_35760, PA14_35770, PA14_35780, PA14_35790	4	NA, NA, NA, NA	NA, NA, NA, NA	No
PA14_12390	PA14_RS05005	operon_1080	0	1	essential gene	C2	set1	hemL	glutamate-1-semialdehyde aminotransferase	97.2478	-1.93475	49.802	-4.58361	33.8581	-6.94219	COG0001	[H] Coenzyme transport and metabolism			essential gene	Conditional	PA14_12390	1	glutamate-1-semialdehyde aminotransferase	PA3977	Yes
PA14_33500	PA14_RS13650	operon_1081	0	1	non essential gene	C5	set2	pvdH	diaminobutyrate--2-oxoglutarate aminotransferase	333.976	0.334517	372.753	0.269989	764.076	0.353913	COG0160	[E] Amino acid transport and metabolism					PA14_33500	1	diaminobutyrate--2-oxoglutarate	PA2413	No
PA14_35890	PA14_RS14595	operon_1082	0	0	non essential gene	C5	set2		diaminobutyrate--2-oxoglutarate aminotransferase	63.4294	0.0185965	54.4133	-0.0314258	116.644	0.0371946	COG0160	[E] Amino acid transport and metabolism					PA14_35890	1	NA	NA	No
PA14_52720	PA14_RS21460	operon_1083	1	1	non essential gene	C5	set2	argD	bifunctional N-succinyldiaminopimelate-aminotransferase/acetylornithine transaminase	229.358	0.0377285	238.912	0.0474172	468.474	0.180202	COG4992	[E] Amino acid transport and metabolism					PA14_52630, PA14_52640, PA14_52660, PA14_52670, PA14_52690, PA14_52700, PA14_52720	7	succinylglutamate desuccinylase, hypothetical protein, succinylarginine dihydrolase, NA, arginine/ornithine succinyltransferase AII, arginine/ornithine succinyltransferase AI, NA	PA0901, PA0900, PA0899, NA, PA0897, PA0896, NA	No
PA14_63500	PA14_RS25980	operon_1084	0	1	non essential gene	C5	set2		hypothetical protein	3169.36	-0.095021	3109.73	-0.123624	4644.31	-0.171356	COG0161	[E] Amino acid transport and metabolism					PA14_63480, PA14_63500	2	putative amino acid, hypothetical protein	PA4804, PA4805	No
PA14_70160	PA14_RS28580	operon_1085	1	1	non essential gene	C5	set2		omega amino acid--pyruvate transaminase	640.952	0.329988	686.99	0.620772	877.594	0.777428	COG0161	[E] Amino acid transport and metabolism					PA14_70160	1	omega amino acid--pyruvate	PA5313	No
PA14_24170	PA14_RS09785	operon_1087	0	0	essential gene	C1	set1	fadH1	2,4-dienoyl-CoA reductase	38.8107	-2.12211	35.3704	-4.642	9.66373	-5.81476	COG0446	[C] Energy production and conversion					PA14_24170	1	2,4-dienoyl-CoA reductase FadH1	PA3092	No
PA14_26130	PA14_RS10595	operon_1088	1	0	essential gene	C4	set2	morB	morphinone reductase	9.50805	-0.549882	12.0954	-0.377557	19.3349	-1.0278	COG1902	[C] Energy production and conversion					PA14_26090, PA14_26110, PA14_26130	3	putative hydrolase, putative MFS transporter, morphinone reductase	PA2934, PA2933, PA2932	No
PA14_47000	PA14_RS19105	operon_1089	0	1	non essential gene	C5	set2		oxidoreductase	1054.4	-0.00383384	1023.24	-0.116085	1290.71	-0.0501547	COG1902	[C] Energy production and conversion					PA14_47000	1	putative oxidoreductase	PA1334	No
PA14_72170	PA14_RS29385	operon_109	1	1	non essential gene	C5	set2		citrate transporter	440.412	0.027021	485.31	0.303767	873.153	0.30455	COG2851	[C] Energy production and conversion					PA14_72170, PA14_72180	2	putative citrate transporter, putative membrane protein	PA5468, PA5469	No
PA14_56660	PA14_RS23085	operon_1090	1	1	non essential gene	C5	set2		xenobiotic reductase	408.192	-0.000940255	440.899	0.0700367	1072.13	0.26332	COG1902	[C] Energy production and conversion					PA14_56620, PA14_56640, PA14_56660	3	hypothetical protein, putative MFS transporter, xenobiotic reductase	PA4354, PA4355, PA4356	No
PA14_63640	PA14_RS26030	operon_1091	1	1	essential gene	C4	set2	fadH2	2,4-dienoyl-CoA reductase	257.406	-0.0640076	198.044	-1.15686	204.488	-1.95372	COG0446	[C] Energy production and conversion					PA14_63640	1	2,4-dienoyl-CoA reductase FadH2	PA4814	No
PA14_31610	PA14_RS12935	operon_1092	0	1	essential gene	C4	set1		TerC family protein	26.6867	0.24547	37.3572	-0.959131	18.1502	-1.49293	COG0861	[P] Inorganic ion transport and metabolism					PA14_31610, PA14_31620	2	TerC family protein, hypothetical protein	PA2549, PA2548	No
PA14_49290	PA14_RS20020	operon_1093	1	1	non essential gene	C5	set2		hypothetical protein	1140.09	0.275739	1235.14	0.52948	1722.66	0.780891	COG0861	[P] Inorganic ion transport and metabolism					PA14_49290	1	hypothetical protein	PA1170	No
PA14_01470	PA14_RS00610	operon_1096	1	1	essential gene	C3	set2		transcriptional regulator	189.909	-1.52878	169.975	-2.59619	180.545	-3.24221	COG2186	[K] Transcription					PA14_01470	1	putative transcriptional regulator	PA0120	No
PA14_43480	PA14_RS17660	operon_1097	1	0	non essential gene	C5	set2		GntR family transcriptional regulator	16.8257	0.139765	15.8478	0.563122	37.5551	0.568016	COG2186	[K] Transcription					PA14_43480, PA14_43490	2	GntR family transcriptional, putative cyanate MFS	PA1627, PA1626	No
PA14_63070	PA14_RS25785	operon_1098	1	1	non essential gene	C5	set2		GntR family transcriptional regulator	537.048	-0.0413196	561.327	0.218792	698.19	0.146543	COG2186	[K] Transcription					PA14_63070	1	GntR family transcriptional	PA4769	No
PA14_70710	PA14_RS28790	operon_1099	1	1	non essential gene	C5	set2	glcC	DNA-binding transcriptional regulator GlcC	971.241	0.0813782	1036.99	0.130612	1235.87	0.175612	COG2186	[K] Transcription					PA14_70710	1	DNA-binding transcriptional regulator	PA5356	No
PA14_21640	PA14_RS08715	operon_11	1	0	non essential gene	C5	set2		short chain dehydrogenase	40.181	0.163361	41.317	0.419984	52.407	-0.191604	COG1028	[I] Lipid transport and metabolism					PA14_21640	1	short chain dehydrogenase	PA3277	No
PA14_21640	PA14_RS08715	operon_11	1	0	non essential gene	C5	set2		short chain dehydrogenase	40.181	0.163361	41.317	0.419984	52.407	-0.191604	COG1028	[Q] Secondary metabolites biosynthesis, transport and catabolism					PA14_21640	1	short chain dehydrogenase	PA3277	No
PA14_30350	PA14_RS12370	operon_1101	1	1	non essential gene	C5	set2		hypothetical protein	166.279	0.182739	156.862	-0.142964	201.299	-0.139807	COG0435	[O] Posttranslational modification, protein turnover, chaperones					PA14_30350	1	hypothetical protein	PA2610	No
PA14_07330	PA14_RS02935	operon_1102	1	1	non essential gene	C5	set2		hypothetical protein	951.989	-0.028501	960.694	-0.0888187	2010.75	-0.0673022	COG3152	[S] Function unknown					PA14_07330	1	hypothetical protein	PA0563	No
PA14_33430	PA14_RS13625	operon_1106	0	0	non essential gene	C5	set2		pirin-related protein	87.1759	-0.174808	82.4037	0.172767	207.367	0.379923	COG1741	[S] Function unknown					PA14_33430	1	putative pirin-related protein	PA2418	No
PA14_48650	PA14_RS19755	operon_1107	0	1	non essential gene	C5	set2		hypothetical protein	780.568	0.0135142	821.889	-0.157025	1543.34	-0.062273	COG1741	[S] Function unknown					PA14_48650	1	hypothetical protein	PA1210	No
PA14_48730	PA14_RS19780	operon_1108	1	0	non essential gene	C5	set2		hypothetical protein	11.2806	-0.584919	10.4111	-0.365929	15.1545	-0.157348	COG1741	[S] Function unknown					PA14_48730, PA14_48740	2	hypothetical protein, hypothetical protein	PA1205, PA1204	No
PA14_57480	PA14_RS23430	operon_1109	1	1	non essential gene	C5	set2		lipoprotein	241.511	0.0108435	219.161	-0.202243	452.015	-0.354983	COG3107	[M] Cell wall/membrane/envelope biogenesis					PA14_57480, PA14_57490, PA14_57500, PA14_57510	4	putative lipoprotein, hypothetical protein, phosphoheptose isomerase, putative secreted lipoprotein	PA4423, PA4424, PA4425, PA4426	Yes
PA14_57490	PA14_RS23435	operon_1109	1	1	non essential gene	C5	set2		hypothetical protein	1373.44	-0.0636401	1356.26	-0.0816367	1606.61	-0.0548409	COG0792	[L] Replication, recombination and repair					PA14_57480, PA14_57490, PA14_57500, PA14_57510	4	putative lipoprotein, hypothetical protein, phosphoheptose isomerase, putative secreted lipoprotein	PA4423, PA4424, PA4425, PA4426	Yes
PA14_57500	PA14_RS23440	operon_1109	1	1	non essential gene	C5	set2	gmhA	phosphoheptose isomerase	226.047	-0.716707	230.793	-0.158438	661.068	0.0206448	COG0279	[G] Carbohydrate transport and metabolism	essential gene	essential gene	essential gene	Core	PA14_57480, PA14_57490, PA14_57500, PA14_57510	4	putative lipoprotein, hypothetical protein, phosphoheptose isomerase, putative secreted lipoprotein	PA4423, PA4424, PA4425, PA4426	Yes
PA14_57510	PA14_RS23445	operon_1109	0	1	essential gene	C4	set1		secreted lipoprotein	313.202	-0.566679	179.044	-1.63913	107.547	-2.20786	COG2823	[S] Function unknown					PA14_57480, PA14_57490, PA14_57500, PA14_57510	4	putative lipoprotein, hypothetical protein, phosphoheptose isomerase, putative secreted lipoprotein	PA4423, PA4424, PA4425, PA4426	Yes
PA14_65130	PA14_RS26625	operon_111	1	1	essential gene	C4	set1	dnaB	replicative DNA helicase	1588.69	-0.507426	798.525	-1.47673	368.168	-2.44851	COG0305	[L] Replication, recombination and repair			essential gene	Core	PA14_65110, PA14_65130	2	biosynthetic alanine racemase, replicative DNA helicase	PA4930, PA4931	Yes
PA14_14150	PA14_RS05655	operon_1114	1	1	non essential gene	C5	set2		GIY-YIG nuclease superfamily protein	194.654	0.732668	228.737	1.12403	587.403	1.60032	COG2827	[L] Replication, recombination and repair					PA14_14150, PA14_14160	2	GIY-YIG nuclease superfamily, putative acetyltransferase	PA3854, PA3853	No
PA14_13300	PA14_RS05350	operon_1115	1	0	non essential gene	C5	set2		hypothetical protein	25.3323	-0.442522	25.0548	0.102772	60.1167	0.197711	COG0826	[O] Posttranslational modification, protein turnover, chaperones					PA14_13290, PA14_13300, PA14_13320, PA14_13330, PA14_13340	5	putative protease, hypothetical protein, hypothetical protein, hypothetical protein, extracellular nuclease	PA3913, PA3912, PA3911, PA3910, PA3909	No
PA14_32520	PA14_RS13265	operon_1116	1	1	non essential gene	C5	set2		hypothetical protein	717.229	0.398561	820.69	0.780809	1225.87	1.00131	COG2141	[C] Energy production and conversion					PA14_32520	1	hypothetical protein	PA2483	No
PA14_73330	PA14_RS29855	operon_112	1	1	non essential gene	C5	set2	parB	chromosome partitioning protein Spo0J	704.255	-0.237204	620.127	-0.663006	753.686	-0.984628	COG1475	[K] Transcription					PA14_73330, PA14_73350, PA14_73360, PA14_73370	4	chromosome partitioning protein, chromosome partitioning protein, 16S rRNA methyltransferase, tRNA uridine 5-carboxymethylaminomethyl	PA5562, PA5563, PA5564, PA5565	Yes
PA14_73350	PA14_RS29860	operon_112	0	1	non essential gene	C5	set2	soj	chromosome partitioning protein Soj	151.55	0.336269	162.682	0.701573	193.24	1.07787	COG1192	[D] Cell cycle control, cell division, chromosome partitioning					PA14_73330, PA14_73350, PA14_73360, PA14_73370	4	chromosome partitioning protein, chromosome partitioning protein, 16S rRNA methyltransferase, tRNA uridine 5-carboxymethylaminomethyl	PA5562, PA5563, PA5564, PA5565	Yes
PA14_09150	PA14_RS03715	operon_113	1	1	non essential gene	C5	set2	katA	catalase	275.341	-0.0730595	274.746	0.0369746	629.726	0.181615	COG0753	[P] Inorganic ion transport and metabolism					PA14_09150	1	catalase	PA4236	No
PA14_62880	PA14_RS25705	operon_1131	1	0	non essential gene	C5	set2		hypothetical protein	97.8587	-0.0463205	97.6909	0.0903332	103.949	0.177128	COG1534	[J] Translation, ribosomal structure and biogenesis					PA14_62880	1	hypothetical protein	PA4753	No
PA14_24690	PA14_RS10000	operon_1132	1	1	non essential gene	C5	set2		D-alanyl-D-alanine carboxypeptidase	362.737	0.0888975	358.167	0.126408	858.468	0.223649	COG2027	[M] Cell wall/membrane/envelope biogenesis					PA14_24690	1	putative D-alanyl-D-alanine carboxypeptidase	PA3047	No
PA14_57900	PA14_RS23605	operon_1133	1	1	non essential gene	C5	set2		hypothetical protein	698.075	-0.144914	682.304	-0.106867	860.009	-0.084184	COG1778	[S] Function unknown		essential gene			PA14_57890, PA14_57900, PA14_57910	3	hypothetical protein, hypothetical protein, hypothetical protein	PA4457, PA4458, PA4459	Yes
PA14_57910	PA14_RS23610	operon_1133	1	1	essential gene	C1	set1		hypothetical protein	2248.98	-2.27483	1165.77	-5.33023	781.67	-8.44279	COG3117	[S] Function unknown		essential gene	essential gene	Core	PA14_57890, PA14_57900, PA14_57910	3	hypothetical protein, hypothetical protein, hypothetical protein	PA4457, PA4458, PA4459	Yes
PA14_57940	PA14_RS23625	operon_1134	1	1	essential gene	C4	set2	rpoN	RNA polymerase factor sigma-54	6669.09	-0.189614	5261.28	-0.745744	8707.18	-1.26127	COG1508	[K] Transcription			essential gene	Core	PA14_57940	1	sigma fact	PA4462	Yes
PA14_57960	PA14_RS23635	operon_1134	0	0	essential gene	C3	set1	ptsN	nitrogen regulatory IIA protein	141.05	-1.15974	57.1547	-1.97691	26.5713	-3.72238	COG1762	[G] Carbohydrate transport and metabolism		essential gene	essential gene	Conditional	PA14_57950, PA14_57960, PA14_57970	3	hypothetical protein, nitrogen regulatory IIA, hypothetical protein	PA4463, PA4464, PA4465	Yes
PA14_57970	PA14_RS23640	operon_1134	1	1	non essential gene	C5	set2		hypothetical protein	243.382	-0.0526896	251.023	-0.126569	482.648	-0.153269	COG1660	[S] Function unknown					PA14_57950, PA14_57960, PA14_57970	3	hypothetical protein, nitrogen regulatory IIA, hypothetical protein	PA4463, PA4464, PA4465	Yes
PA14_57980	PA14_RS23645	operon_1134	0	1	non essential gene	C5	set2		phosphoryl carrier protein	1744.34	-0.0463868	1788.15	0.100109	3813.58	0.156611	COG1925	[G] Carbohydrate transport and metabolism					PA14_57980	1	putative phosphoryl carrier	PA4466	No
PA14_31270	PA14_RS12805	operon_1136	1	1	non essential gene	C5	set2		hypothetical protein	261.419	-0.10928	242.171	-0.0413046	263.667	-0.0642136	COG4804	[S] Function unknown					PA14_31270, PA14_31280	2	NA, NA	NA, NA	No
PA14_57690	PA14_RS23520	operon_1137	0	1	non essential gene	C5	set2		hypothetical protein	599.541	0.0907304	653.985	0.257077	826.548	0.40787	COG3105	[S] Function unknown					PA14_57690	1	hypothetical protein	PA4441	No
PA14_40830	PA14_RS16550	operon_1139	1	1	non essential gene	C5	set2		oxidoreductase	687.865	0.234025	682.847	-0.0188446	992.367	0.0108494	COG0604	[C] Energy production and conversion					PA14_40830	1	putative oxidoreductase	PA1833	No
PA14_64140	PA14_RS26215	operon_1143	0	1	non essential gene	C5	set2	prmA	50S ribosomal protein L11 methyltransferase	415.065	0.0996082	407.014	-0.0249936	503.218	-0.151925	COG2264	[J] Translation, ribosomal structure and biogenesis					PA14_64140	1	ribosomal protein L11	PA4850	No
PA14_31870	PA14_RS13040	operon_1145	1	0	non essential gene	C5	set2		RND efflux membrane fusion protein	88.1545	-0.214448	86.228	-0.195735	97.9419	0.0489247	COG0845	[M] Cell wall/membrane/envelope biogenesis					PA14_31870, PA14_31890, PA14_31900, PA14_31920, PA14_31930	5	putative RND efflux, putative RND efflux, putative efflux transporter, putative outer membrane, NA	PA2528, PA2527, PA2526, PA2525, NA	No
PA14_45910	PA14_RS18630	operon_1146	1	1	non essential gene	C5	set2		RND efflux membrane fusion protein	258.193	0.00826331	259.425	-0.142685	456.032	-0.1732	COG0845	[M] Cell wall/membrane/envelope biogenesis					PA14_45890, PA14_45910	2	putative RND efflux, putative RND efflux	PA1436, PA1435	No
PA14_00780	PA14_RS00335	operon_1147	1	1	non essential gene	C5	set2		hypothetical protein	443.575	-0.153186	399.811	-0.128451	637.63	-0.25015	COG0663	[S] Function unknown					PA14_00770, PA14_00780	2	hypothetical protein, hypothetical protein	PA0065, PA0066	No
PA14_61050	PA14_RS24940	operon_1148	1	1	non essential gene	C5	set2	mscL	large-conductance mechanosensitive channel	315.979	0.0273911	302.099	-0.00131127	687.097	0.0354099	COG1970	[M] Cell wall/membrane/envelope biogenesis					PA14_61050	1	large-conductance mechanosensitive channel	PA4614	No
PA14_51850	PA14_RS21105	operon_1149	1	1	non essential gene	C5	set2		hypothetical protein	198.181	-0.107261	200.646	-0.0445195	469.153	-0.224061	COG2900	[S] Function unknown					PA14_51850, PA14_51860	2	hypothetical protein, hypothetical protein	PA0960, PA0959	No
PA14_61040	PA14_RS24930	operon_115	0	0	non essential gene	C5	set2	katB	catalase	153.964	0.416751	149.548	0.520738	269.286	0.526249	COG0753	[C] Energy production and conversion					PA14_61020, PA14_61040	2	hypothetical protein, catalase	PA4612, PA4613	No
PA14_30340	PA14_RS12365	operon_1150	1	1	non essential gene	C5	set2	cysG	siroheme synthase	96.7369	-0.0741149	95.3468	-0.0589416	222.678	-0.0328414	COG0007	[H] Coenzyme transport and metabolism				Conditional	PA14_30330, PA14_30340	2	seryl-tRNA synthetase, siroheme synthase	PA2612, PA2611	Yes
PA14_68580	PA14_RS27965	operon_1156	1	1	non essential gene	C5	set2	pckA	phosphoenolpyruvate carboxykinase	1641.57	0.188088	1557.76	-0.258608	2049.24	-0.311704	COG1866	[H] Coenzyme transport and metabolism					PA14_68580	1	phosphoenolpyruvate carboxykinase	PA5192	No
PA14_27130	PA14_RS10965	operon_1157	1	0	non essential gene	C5	set2	greB	transcription elongation factor GreB	53.497	-0.0303119	53.3074	0.220959	141.034	0.146968	COG0782	[K] Transcription					PA14_27130	1	transcription elongation factor	PA2859	No
PA14_62900	PA14_RS25715	operon_1158	0	1	non essential gene	C5	set2	greA	transcription elongation factor GreA	565.068	-0.0529601	521.115	-0.0603661	640.35	-0.0156436	COG0782	[K] Transcription		essential gene			PA14_62890, PA14_62900	2	hypothetical protein, transcription elongation factor	PA4754, PA4755	No
PA14_68710	PA14_RS28010	operon_1159	0	1	non essential gene	C5	set2		hypothetical protein	5113.59	-0.135526	5028.98	-0.10824	5486.81	-0.219399	COG2183	[K] Transcription					PA14_68710, PA14_68720	2	hypothetical protein, hypothetical protein	PA5201, PA5202	No
PA14_29420	PA14_RS12005	operon_116	1	1	non essential gene	C5	set2		hypothetical protein	600.933	-0.117379	570.099	-0.258625	1010.49	-0.265815	COG0412	[Q] Secondary metabolites biosynthesis, transport and catabolism					PA14_29420	1	hypothetical protein	PA2682	No
PA14_56670	PA14_RS23090	operon_1160	0	1	non essential gene	C5	set2		hypothetical protein	1485.21	-0.0637135	1413.86	-0.180186	2891.57	-0.24044	2E630	[K] Transcription	essential gene				PA14_56670, PA14_56680	2	hypothetical protein, ferrous iron transport	PA4357, PA4358	No
PA14_56680	PA14_RS23095	operon_1160	0	1	non essential gene	C5	set2	feoB	ferrous iron transport protein B	2262.48	-0.0154666	2168.47	-0.144072	2441.47	-0.232374	COG0370	[P] Inorganic ion transport and metabolism					PA14_56670, PA14_56680	2	hypothetical protein, ferrous iron transport	PA4357, PA4358	No
PA14_56690	PA14_RS23100	operon_1160	0	1	non essential gene	C5	set2	feoA	ferrous iron transport protein A	165.675	-0.144067	181.917	-0.105178	231.887	0.0912305	COG1918	[P] Inorganic ion transport and metabolism					PA14_56690	1	ferrous iron transport	PA4359	No
PA14_40630	PA14_RS16470	operon_1161	1	1	essential gene	C4	set2		hypothetical protein	2307.05	-0.606103	1860.59	-1.06077	1864.86	-1.72878	COG0316	[C] Energy production and conversion					PA14_40630	1	hypothetical protein	PA1847	No
PA14_34630	PA14_RS14090	operon_1162	1	1	non essential gene	C5	set2	gnuT	gluconate permease	452.045	0.323291	495.182	0.425478	991.586	0.671237	COG2610	[E] Amino acid transport and metabolism					PA14_34610, PA14_34630	2	NA, gluconate permease	NA, PA2322	No
PA14_34630	PA14_RS14090	operon_1162	1	1	non essential gene	C5	set2	gnuT	gluconate permease	452.045	0.323291	495.182	0.425478	991.586	0.671237	COG2610	[G] Carbohydrate transport and metabolism					PA14_34610, PA14_34630	2	NA, gluconate permease	NA, PA2322	No
PA14_50770	PA14_RS20620	operon_1163	1	1	essential gene	C4	set1		transporter	491.507	-0.343152	266.779	-0.975125	174.262	-1.06424	COG2610	[E] Amino acid transport and metabolism					PA14_50770	1	transporter	PA1051	No
PA14_50770	PA14_RS20620	operon_1163	1	1	essential gene	C4	set1		transporter	491.507	-0.343152	266.779	-0.975125	174.262	-1.06424	COG2610	[G] Carbohydrate transport and metabolism					PA14_50770	1	transporter	PA1051	No
PA14_46440	PA14_RS18850	operon_1169	1	1	non essential gene	C5	set2		acetyltransferase	1037.04	-0.0696885	1022.45	-0.0131435	1138.8	-0.0295333	COG1670	[J] Translation, ribosomal structure and biogenesis					PA14_46430, PA14_46440	2	hypothetical protein, putative acetyltransferase	PA1378, PA1377	No
PA14_42970	PA14_RS17455	operon_117	1	1	non essential gene	C5	set2	sfa2	Sfa2	735.542	-0.172675	661.378	-0.248875	1381.48	-0.466927	COG3604	[K] Transcription					PA14_42880, PA14_42890, PA14_42900, PA14_42910, PA14_42920, PA14_42940, PA14_42950, PA14_42960, PA14_42970, PA14_42980, PA14_42990, PA14_43000	12	serine-threonine kinase Stk1, serine/threonine phosphoprotein phosphatase, hypothetical protein, hypothetical protein, hypothetical protein, putative lipoprotein, hypothetical protein, NA, putative transcriptional regulator, putative ClpA/B-type protease, hypothetical protein, hypothetical protein	PA1671, PA1670, PA1669, PA1668, PA1667, PA1666, PA1665, NA, PA1663, PA1662, PA1661, PA1660	No
PA14_42970	PA14_RS17455	operon_117	1	1	non essential gene	C5	set2	sfa2	Sfa2	735.542	-0.172675	661.378	-0.248875	1381.48	-0.466927	COG3604	[T] Signal transduction mechanisms					PA14_42880, PA14_42890, PA14_42900, PA14_42910, PA14_42920, PA14_42940, PA14_42950, PA14_42960, PA14_42970, PA14_42980, PA14_42990, PA14_43000	12	serine-threonine kinase Stk1, serine/threonine phosphoprotein phosphatase, hypothetical protein, hypothetical protein, hypothetical protein, putative lipoprotein, hypothetical protein, NA, putative transcriptional regulator, putative ClpA/B-type protease, hypothetical protein, hypothetical protein	PA1671, PA1670, PA1669, PA1668, PA1667, PA1666, PA1665, NA, PA1663, PA1662, PA1661, PA1660	No
PA14_67940	PA14_RS27705	operon_1170	1	1	non essential gene	C5	set2		hypothetical protein	1982.25	-0.0197036	1903.22	-0.0605346	2272.37	-0.067016	COG0454	[K] Transcription					PA14_67940	1	hypothetical protein	PA5144	No
PA14_00140	PA14_RS00065	operon_1171	1	1	non essential gene	C5	set2		hypothetical protein	199.784	-0.64537	171.466	-0.75998	175.093	-0.92884	COG1738	[U] Intracellular trafficking, secretion, and vesicular transport					PA14_00140	1	hypothetical protein	PA0013	No
PA14_55770	PA14_RS22760	operon_1173	1	1	essential gene	C3	set1		phosphate transporter	1864.75	-1.24039	958.479	-1.95907	578.188	-2.37543	COG0306	[P] Inorganic ion transport and metabolism				Conditional	PA14_55770	1	putative phosphate transporter	PA4292	Yes
PA14_68780	PA14_RS28040	operon_1174	0	1	essential gene	C4	set2		phosphate transporter	1525.72	-0.323524	1232.68	-1.06719	1187.78	-1.673	COG0306	[P] Inorganic ion transport and metabolism					PA14_68780	1	phosphate transporter	PA5207	No
PA14_25390	PA14_RS10285	operon_1176	1	1	essential gene	C3	set1	sth	soluble pyridine nucleotide transhydrogenase	1161.72	-1.20606	559.407	-2.3757	253.929	-3.22623	COG1249	[C] Energy production and conversion			essential gene	Conditional	PA14_25390	1	soluble pyridine nucleotide	PA2991	Yes
PA14_38330	PA14_RS15575	operon_1177	0	0	non essential gene	C5	set2	gor	glutathione reductase	146.251	-0.208535	145.722	-0.224547	162.952	-0.626393	COG1249	[C] Energy production and conversion					PA14_38330	1	glutathione reductase	PA2025	No
PA14_35110	PA14_RS14295	operon_1178	0	0	essential gene	C1	set2	arsB	arsenite-antimonite efflux pump ArsB	13.2488	-2.01686	9.15048	-3.57891	11.8942	-6.36363	COG1055	[P] Inorganic ion transport and metabolism					PA14_35080, PA14_35100, PA14_35110, PA14_35130	4	putative arsenical resistance, arsenate reductase, ArsB protein, arsenic resistance transcriptional	PA2280, PA2279, PA2278, PA2277	No
PA14_51980	PA14_RS21160	operon_1179	0	0	non essential gene	C5	set2		arsenate reductase	84.1203	-0.0274126	77.0902	0.0550264	156.435	-0.214646	COG1393	[P] Inorganic ion transport and metabolism					PA14_51980, PA14_51990, PA14_52000	3	putative arsenate reductase, Trp repressor binding, hypothetical protein	PA0950, PA0949, PA0948	No
PA14_63080	PA14_RS25790	operon_118	0	1	non essential gene	C5	set2	lldP	L-lactate permease	1982.72	-0.0924056	1862.85	-0.242792	3821.56	-0.311227	COG1620	[C] Energy production and conversion					PA14_63080, PA14_63090, PA14_63100	3	L-lactate permease, L-lactate dehydrogenase, putative ferredoxin	PA4770, PA4771, PA4772	No
PA14_33450	PA14_RS13635	operon_1182	1	1	essential gene	C4	set2	treA	trehalase	1672.12	-0.0521024	1428.3	-0.461004	3195.9	-1.11871	COG1626	[G] Carbohydrate transport and metabolism					PA14_33450	1	trehalase	PA2416	No
PA14_34340	PA14_RS14000	operon_1183	1	1	non essential gene	C5	set2	mtlZ	fructokinase	210.562	-0.0218668	207.425	-0.0627592	380.123	0.00693309	COG0524	[G] Carbohydrate transport and metabolism					PA14_34340	1	fructokinase	PA2344	No
PA14_35340	PA14_RS14380	operon_1184	1	0	non essential gene	C5	set2		2-ketogluconate kinase	138.378	-0.0775845	137.563	-0.00449584	164.14	0.155286	COG0524	[G] Carbohydrate transport and metabolism					PA14_35320, PA14_35330, PA14_35340, PA14_35360	4	putative 2-hydroxyacid dehydrogenase, putative 2-ketogluconate transporter, putative 2-ketogluconate kinase, hypothetical protein	PA2263, PA2262, PA2261, PA2260	No
PA14_53500	PA14_RS21775	operon_1185	1	1	non essential gene	C5	set2		hypothetical protein	274.642	-0.0617771	260.717	-0.210794	317.211	-0.356757	COG2885	[M] Cell wall/membrane/envelope biogenesis					PA14_53500	1	hypothetical protein	PA0833	No
PA14_13500	PA14_RS05430	operon_1186	1	1	essential gene	C4	set2		2-hydroxyacid dehydrogenase	144.6	-0.263459	114.105	-1.02854	216.459	-1.71162	COG1052	[C] Energy production and conversion					PA14_13500	1	putative 2-hydroxyacid dehydrogenase	PA3896	No
PA14_13500	PA14_RS05430	operon_1186	1	1	essential gene	C4	set2		2-hydroxyacid dehydrogenase	144.6	-0.263459	114.105	-1.02854	216.459	-1.71162	COG1052	[H] Coenzyme transport and metabolism					PA14_13500	1	putative 2-hydroxyacid dehydrogenase	PA3896	No
PA14_30100	PA14_RS12270	operon_119	1	1	non essential gene	C5	set2		hypothetical protein	703.887	0.180177	753.123	0.239967	1147.8	0.338931	COG2850	[S] Function unknown					PA14_30100, PA14_30110	2	hypothetical protein, adenylosuccinate lyase	PA2630, PA2629	Yes
PA14_25660	PA14_RS10410	operon_12	0	1	essential gene	C2	set1	fabG	3-ketoacyl-ACP reductase	49.0738	-1.31067	22.4211	-3.30277	11.5298	-5.38559	COG1028	[Q] Secondary metabolites biosynthesis, transport and catabolism	essential gene		essential gene	Core	PA14_25660	1	NA	NA	Yes
PA14_25660	PA14_RS10410	operon_12	0	1	essential gene	C2	set1	fabG	3-ketoacyl-ACP reductase	49.0738	-1.31067	22.4211	-3.30277	11.5298	-5.38559	COG1028	[I] Lipid transport and metabolism	essential gene		essential gene	Core	PA14_25660	1	NA	NA	Yes
PA14_10750	PA14_RS04335	operon_120	1	1	non essential gene	C5	set2		sugar efflux transporter	1368.53	-0.100889	1258.79	-0.0699153	1500.58	-0.12003	COG0477	[E] Amino acid transport and metabolism					PA14_10750	1	sugar efflux transporter	PA4113	No
PA14_10750	PA14_RS04335	operon_120	1	1	non essential gene	C5	set2		sugar efflux transporter	1368.53	-0.100889	1258.79	-0.0699153	1500.58	-0.12003	COG0477	[G] Carbohydrate transport and metabolism					PA14_10750	1	sugar efflux transporter	PA4113	No
PA14_10750	PA14_RS04335	operon_120	1	1	non essential gene	C5	set2		sugar efflux transporter	1368.53	-0.100889	1258.79	-0.0699153	1500.58	-0.12003	COG0477	[P] Inorganic ion transport and metabolism					PA14_10750	1	sugar efflux transporter	PA4113	No
PA14_67710	PA14_RS27615	operon_1205	1	0	non essential gene	C5	set2		rRNA methylase	150.671	-0.366118	154.141	-0.115991	177.43	-0.0111506	COG0219	[J] Translation, ribosomal structure and biogenesis					PA14_67710	1	putative rRNA methylase	PA5127	No
PA14_67820	PA14_RS27655	operon_1206	1	1	non essential gene	C5	set2		hypothetical protein	262.224	-0.250527	235.74	-0.984765	367.933	-0.948441	COG2861	[S] Function unknown					PA14_67790, PA14_67810, PA14_67820	3	putative membrane-bound metallopeptidase, putative carboxyl-terminal protease, hypothetical protein	PA5133, PA5134, PA5135	No
PA14_04760	PA14_RS01930	operon_1207	1	1	essential gene	C3	set2	coaD	phosphopantetheine adenylyltransferase	569.972	-1.00494	440.022	-2.82939	502.204	-2.84544	COG0669	[H] Coenzyme transport and metabolism	essential gene		essential gene	Core	PA14_04760	1	phosphopantetheine adenylyltransferase	PA0363	Yes
PA14_70430	PA14_RS28685	operon_1208	1	1	essential gene	C4	set2		hypothetical protein	273.635	-0.75121	281.934	-1.00604	493.885	-0.797687	COG1561	[S] Function unknown					PA14_70430	1	hypothetical protein	PA5335	No
PA14_50920	PA14_RS20690	operon_1209	1	1	non essential gene	C5	set2		hypothetical protein	1250.56	0.13815	1291.63	0.0996986	2577.55	0.0444343	COG2860	[S] Function unknown					PA14_50920	1	hypothetical protein	PA1037	No
PA14_20900	PA14_RS08405	operon_121	1	1	non essential gene	C5	set2		MFS transporter	2437.49	-0.0230435	2404.8	-0.140087	5880.58	-0.167307	COG0477	[E] Amino acid transport and metabolism					PA14_20900	1	putative MFS transporter	PA3336	No
PA14_20900	PA14_RS08405	operon_121	1	1	non essential gene	C5	set2		MFS transporter	2437.49	-0.0230435	2404.8	-0.140087	5880.58	-0.167307	COG0477	[P] Inorganic ion transport and metabolism					PA14_20900	1	putative MFS transporter	PA3336	No
PA14_20900	PA14_RS08405	operon_121	1	1	non essential gene	C5	set2		MFS transporter	2437.49	-0.0230435	2404.8	-0.140087	5880.58	-0.167307	COG0477	[G] Carbohydrate transport and metabolism					PA14_20900	1	putative MFS transporter	PA3336	No
PA14_26110	PA14_RS10590	operon_122	1	1	essential gene	C3	set1		MFS transporter	431.178	-1.34451	247.181	-2.19481	145.172	-1.8594	COG0477	[E] Amino acid transport and metabolism					PA14_26090, PA14_26110, PA14_26130	3	putative hydrolase, putative MFS transporter, morphinone reductase	PA2934, PA2933, PA2932	No
PA14_26110	PA14_RS10590	operon_122	1	1	essential gene	C3	set1		MFS transporter	431.178	-1.34451	247.181	-2.19481	145.172	-1.8594	COG0477	[G] Carbohydrate transport and metabolism					PA14_26090, PA14_26110, PA14_26130	3	putative hydrolase, putative MFS transporter, morphinone reductase	PA2934, PA2933, PA2932	No
PA14_26110	PA14_RS10590	operon_122	1	1	essential gene	C3	set1		MFS transporter	431.178	-1.34451	247.181	-2.19481	145.172	-1.8594	COG0477	[P] Inorganic ion transport and metabolism					PA14_26090, PA14_26110, PA14_26130	3	putative hydrolase, putative MFS transporter, morphinone reductase	PA2934, PA2933, PA2932	No
PA14_73410	PA14_RS29885	operon_1226	1	1	essential gene	C1	set1		inner membrane protein translocase component YidC	15.3741	-2.53081	5.82784	-5.95694	1.94015	-4.23762	COG0706	[U] Intracellular trafficking, secretion, and vesicular transport		essential gene	essential gene	Core	PA14_73410	1	putative inner membrane	PA5568	Yes
PA14_73410	PA14_RS29885	operon_1226	1	1	essential gene	C1	set1		inner membrane protein translocase component YidC	15.3741	-2.53081	5.82784	-5.95694	1.94015	-4.23762	COG0706	[U] Intracellular trafficking, secretion, and vesicular transport		essential gene	essential gene	Core	PA14_73410	1	putative inner membrane	PA5568	Yes
PA14_73400	PA14_RS29880	operon_1227	1	1	non essential gene	C5	set2	trmE	tRNA modification GTPase TrmE	358.004	0.134255	374.904	0.393568	863.573	0.663989	COG0486	[J] Translation, ribosomal structure and biogenesis			essential gene	Core	PA14_73400	1	tRNA modification GTPase	PA5567	Yes
PA14_34710	PA14_RS14125	operon_123	1	1	non essential gene	C5	set2		major facilitator transporter	655.616	0.0123724	638.685	0.151071	763.23	0.135166	COG0477	[E] Amino acid transport and metabolism					PA14_34700, PA14_34710	2	putative beta lactamase, major facilitator transporter	PA2315, PA2314	No
PA14_34710	PA14_RS14125	operon_123	1	1	non essential gene	C5	set2		major facilitator transporter	655.616	0.0123724	638.685	0.151071	763.23	0.135166	COG0477	[G] Carbohydrate transport and metabolism					PA14_34700, PA14_34710	2	putative beta lactamase, major facilitator transporter	PA2315, PA2314	No
PA14_34710	PA14_RS14125	operon_123	1	1	non essential gene	C5	set2		major facilitator transporter	655.616	0.0123724	638.685	0.151071	763.23	0.135166	COG0477	[P] Inorganic ion transport and metabolism					PA14_34700, PA14_34710	2	putative beta lactamase, major facilitator transporter	PA2315, PA2314	No
PA14_07310	PA14_RS02930	operon_1232	1	1	non essential gene	C5	set2		hydrolase	2352.36	-0.0600068	2317.44	-0.0795619	2776.05	-0.156088	COG0637	[S] Function unknown					PA14_07310	1	putative hydrolase	PA0562	No
PA14_52400	PA14_RS21335	operon_1233	1	1	non essential gene	C5	set2	kup	potassium uptake protein Kup	121.784	-0.208722	131.319	-0.137189	215.223	-0.045136	COG3158	[P] Inorganic ion transport and metabolism					PA14_52400	1	potassium uptake protein	PA0917	No
PA14_62130	PA14_RS25395	operon_1236	1	1	non essential gene	C5	set2	ilvC	ketol-acid reductoisomerase	537.287	0.186824	521.888	0.331147	676.717	0.464886	COG0059	[E] Amino acid transport and metabolism				Conditional	PA14_62130	1	ketol-acid reductoisomerase	PA4694	Yes
PA14_62130	PA14_RS25395	operon_1236	1	1	non essential gene	C5	set2	ilvC	ketol-acid reductoisomerase	537.287	0.186824	521.888	0.331147	676.717	0.464886	COG0059	[H] Coenzyme transport and metabolism				Conditional	PA14_62130	1	ketol-acid reductoisomerase	PA4694	Yes
PA14_69610	PA14_RS28375	operon_1239	1	1	non essential gene	C5	set2	cyaA	adenylate cyclase	392.902	-0.157889	395.641	-0.0507447	1065.9	-0.160505	COG3072	[F] Nucleotide transport and metabolism					PA14_69610, PA14_69620	2	adenylate cyclase, hypothetical protein	PA5272, PA5273	No
PA14_56640	PA14_RS23080	operon_124	1	1	non essential gene	C5	set2		MFS transporter	802.301	0.380963	836.172	0.252926	2029.37	0.534294	COG0477	[G] Carbohydrate transport and metabolism					PA14_56620, PA14_56640, PA14_56660	3	hypothetical protein, putative MFS transporter, xenobiotic reductase	PA4354, PA4355, PA4356	No
PA14_56640	PA14_RS23080	operon_124	1	1	non essential gene	C5	set2		MFS transporter	802.301	0.380963	836.172	0.252926	2029.37	0.534294	COG0477	[E] Amino acid transport and metabolism					PA14_56620, PA14_56640, PA14_56660	3	hypothetical protein, putative MFS transporter, xenobiotic reductase	PA4354, PA4355, PA4356	No
PA14_56640	PA14_RS23080	operon_124	1	1	non essential gene	C5	set2		MFS transporter	802.301	0.380963	836.172	0.252926	2029.37	0.534294	COG0477	[P] Inorganic ion transport and metabolism					PA14_56620, PA14_56640, PA14_56660	3	hypothetical protein, putative MFS transporter, xenobiotic reductase	PA4354, PA4355, PA4356	No
PA14_69910	PA14_RS28495	operon_1240	1	1	essential gene	C4	set2	rep	ATP-dependent DNA helicase Rep	136.316	-0.790793	107.96	-1.4947	158.156	-1.48364	COG0210	[L] Replication, recombination and repair			essential gene	Conditional	PA14_69910	1	ATP-dependent DNA helicase	PA5296	Yes
PA14_71870	PA14_RS29260	operon_1241	1	0	essential gene	C1	set2	uvrD	DNA-dependent helicase II	11.5313	-3.24991	11.2117	-7.05677	14.3711	-7.37152	COG0210	[L] Replication, recombination and repair					PA14_71870, PA14_71880	2	DNA-dependent helicase II, hypothetical protein	PA5443, PA5444	No
PA14_19150	PA14_RS07675	operon_1242	1	0	non essential gene	C5	set2		hypothetical protein	76.5335	-0.198963	81.0102	0.193266	179.236	0.0152059	COG0697	[E] Amino acid transport and metabolism					PA14_19150, PA14_19160	2	hypothetical protein, hypothetical protein	PA3474, PA3473	No
PA14_19150	PA14_RS07675	operon_1242	1	0	non essential gene	C5	set2		hypothetical protein	76.5335	-0.198963	81.0102	0.193266	179.236	0.0152059	COG0697	[G] Carbohydrate transport and metabolism					PA14_19150, PA14_19160	2	hypothetical protein, hypothetical protein	PA3474, PA3473	No
PA14_39590	PA14_RS16045	operon_1243	1	1	non essential gene	C5	set2	metE	5- methyltetrahydropteroyltriglutamate/homocysteine S-methyltransferase	477.49	0.150552	507.092	0.474135	722.138	0.588973	COG0620	[E] Amino acid transport and metabolism					PA14_39590	1	5-methyltetrahydropteroyltriglutamate--	PA1927	No
PA14_06330	PA14_RS02555	operon_1244	1	1	non essential gene	C5	set2		serine/threonine protein kinase	156.599	0.0624002	136.194	-0.0605733	221.781	-0.0970139	COG2334	[F] Nucleotide transport and metabolism					PA14_06330	1	serine/threonine protein kinase	PA0486	No
PA14_72450	PA14_RS29490	operon_1245	1	1	non essential gene	C5	set2	dsbA1	DsbA1	2260.72	-0.33862	2064.44	-0.659992	3206.48	-0.931718	COG1651	[O] Posttranslational modification, protein turnover, chaperones					PA14_72420, PA14_72430, PA14_72450	3	GGDEF domain-containing protein, hypothetical protein, thiol:disulfide interchange protein	PA5487, PA5488, PA5489	No
PA14_72490	PA14_RS29510	operon_1246	1	1	essential gene	C3	set1	polA	DNA polymerase I	3718.88	-1.62494	1991.12	-3.34434	1289.09	-3.36981	COG0258	[L] Replication, recombination and repair				Conditional	PA14_72490	1	DNA polymerase I	PA5493	Yes
PA14_54370	PA14_RS22125	operon_1247	1	0	essential gene	C3	set1	lepA	GTP-binding protein LepA	476.349	-1.47232	232.707	-2.08157	170.415	-1.57959	COG0481	[M] Cell wall/membrane/envelope biogenesis		essential gene			PA14_54350, PA14_54370	2	signal peptidase I, GTP-binding protein LepA	PA0768, PA0767	Yes
PA14_67560	PA14_RS27565	operon_1248	1	0	non essential gene	C5	set2	typA	TypA	3.5859	0.20544	4.27317	1.16913	5.90108	1.05063	COG1217	[T] Signal transduction mechanisms					PA14_67560	1	GTP-binding protein TypA/BipA	PA5117	No
PA14_68430	PA14_RS27900	operon_1249	1	1	non essential gene	C5	set2		formate dehydrogenase accessory protein FdhD	326.94	-0.144058	338.541	-0.247249	473.908	-0.354874	COG1526	[C] Energy production and conversion					PA14_68430, PA14_68440	2	putative formate dehydrogenase, putative oxidoreductase	PA5180, PA5181	No
PA14_20680	PA14_RS08310	operon_125	1	1	non essential gene	C5	set2		MFS transporter	2283.69	0.252876	2514.71	0.34599	4535.88	0.511053	COG0477	[E] Amino acid transport and metabolism					PA14_20680	1	putative MFS transporter	PA3355	No
PA14_20680	PA14_RS08310	operon_125	1	1	non essential gene	C5	set2		MFS transporter	2283.69	0.252876	2514.71	0.34599	4535.88	0.511053	COG0477	[G] Carbohydrate transport and metabolism					PA14_20680	1	putative MFS transporter	PA3355	No
PA14_20680	PA14_RS08310	operon_125	1	1	non essential gene	C5	set2		MFS transporter	2283.69	0.252876	2514.71	0.34599	4535.88	0.511053	COG0477	[P] Inorganic ion transport and metabolism					PA14_20680	1	putative MFS transporter	PA3355	No
PA14_06890	PA14_RS02760	operon_1250	1	1	non essential gene	C5	set2		hypothetical protein	1083.55	0.0196167	1077.08	-0.0741464	1349.81	-0.0494529	COG2258	[S] Function unknown					PA14_06890, PA14_06900, PA14_06920, PA14_06930	4	hypothetical protein, NA, putative class III, putative glutamine amidotransferase	PA0529, NA, PA0530, PA0531	No
PA14_05200	PA14_RS02110	operon_1251	1	1	non essential gene	C5	set2		cation efflux system protein	1223.06	-0.092152	1175.25	-0.0814041	1389.75	-0.0790704	COG1230	[P] Inorganic ion transport and metabolism					PA14_05200	1	putative cation efflux	PA0397	No
PA14_12610	PA14_RS05080	operon_1252	0	0	non essential gene	C5	set2		transporter	149.331	0.206478	144.833	0.345906	249.436	0.389052	COG0053	[P] Inorganic ion transport and metabolism					PA14_12590, PA14_12610	2	hypothetical protein, putative transporter	PA3964, PA3963	No
PA14_47430	PA14_RS19290	operon_1253	1	0	non essential gene	C5	set2		metal transporter	62.6081	0.0215849	68.4822	0.170022	121.777	0.0508366	COG1230	[P] Inorganic ion transport and metabolism					PA14_47430	1	putative metal transporter	PA1297	No
PA14_03700	PA14_RS01515	operon_1254	1	1	non essential gene	C5	set2	sbp	sulfate-binding protein	909.395	0.048335	943.629	0.165383	1914.8	0.0581708	COG1613	[P] Inorganic ion transport and metabolism					PA14_03650, PA14_03670, PA14_03680, PA14_03700	4	sulfate transport protein, sulfate transport protein, sulfate transport protein, sulfate-binding protein precursor	PA0280, PA0281, PA0282, PA0283	No
PA14_45110	PA14_RS18340	operon_1255	1	1	non essential gene	C5	set2	cysP	sulfate-binding protein of ABC transporter	324.972	-0.143585	301.695	-0.108912	453.496	-0.13457	COG1613	[P] Inorganic ion transport and metabolism					PA14_45110	1	sulfate-binding protein of	PA1493	No
PA14_17700	PA14_RS07120	operon_1257	1	1	non essential gene	C5	set2	rpmE2	50S ribosomal protein L31	283.926	-0.00508343	299.144	0.147816	452.501	0.207551	COG0254	[J] Translation, ribosomal structure and biogenesis					PA14_17700, PA14_17710	2	50S ribosomal protein, 50S ribosomal protein	PA3601, PA3600	No
PA14_66710	PA14_RS27230	operon_1258	1	0	essential gene	C3	set1	rpmE	50S ribosomal protein L31	1823.41	-1.59702	983.386	-2.94084	408.962	-3.61402	COG0254	[J] Translation, ribosomal structure and biogenesis		essential gene			PA14_66710	1	50S ribosomal protein	PA5049	No
PA14_64590	PA14_RS26405	operon_126	1	1	non essential gene	C5	set2		MFS transporter	128.958	0.0823854	125.171	-0.0235941	332.324	-0.0704677	COG0477	[E] Amino acid transport and metabolism					PA14_64590	1	putative MFS transporter	PA4887	No
PA14_64590	PA14_RS26405	operon_126	1	1	non essential gene	C5	set2		MFS transporter	128.958	0.0823854	125.171	-0.0235941	332.324	-0.0704677	COG0477	[G] Carbohydrate transport and metabolism					PA14_64590	1	putative MFS transporter	PA4887	No
PA14_64590	PA14_RS26405	operon_126	1	1	non essential gene	C5	set2		MFS transporter	128.958	0.0823854	125.171	-0.0235941	332.324	-0.0704677	COG0477	[P] Inorganic ion transport and metabolism					PA14_64590	1	putative MFS transporter	PA4887	No
PA14_46200	PA14_RS18745	operon_1260	0	1	non essential gene	C5	set2		hypothetical protein	303.862	-0.162479	278.449	-0.168646	341.379	-0.411708	COG0697	[E] Amino acid transport and metabolism					PA14_46200	1	hypothetical protein	PA1411	No
PA14_46200	PA14_RS18745	operon_1260	0	1	non essential gene	C5	set2		hypothetical protein	303.862	-0.162479	278.449	-0.168646	341.379	-0.411708	COG0697	[G] Carbohydrate transport and metabolism					PA14_46200	1	hypothetical protein	PA1411	No
PA14_63190	PA14_RS25840	operon_1261	0	0	non essential gene	C5	set2		hypothetical protein	29.3523	-0.3066	28.086	-0.426532	52.2316	-0.429772	COG0697	[E] Amino acid transport and metabolism					PA14_63190	1	hypothetical protein	PA4779	No
PA14_63190	PA14_RS25840	operon_1261	0	0	non essential gene	C5	set2		hypothetical protein	29.3523	-0.3066	28.086	-0.426532	52.2316	-0.429772	COG0697	[G] Carbohydrate transport and metabolism					PA14_63190	1	hypothetical protein	PA4779	No
PA14_70560	PA14_RS28730	operon_1262	1	1	non essential gene	C5	set2		LysR family transcriptional regulator	274.775	0.0610466	265.041	-0.247202	518.703	-0.356053	COG0583	[K] Transcription					PA14_70560, PA14_70570	2	LysR family transcriptional, ATP-dependent DNA helicase	PA5344, PA5345	No
PA14_61660	PA14_RS25195	operon_1263	1	0	non essential gene	C5	set2	murI	glutamate racemase	26.8766	0.068422	23.9181	-0.280663	34.787	-0.0710021	COG0796	[M] Cell wall/membrane/envelope biogenesis	essential gene	essential gene	essential gene	Core	PA14_61660, PA14_61670, PA14_61680, PA14_61700, PA14_61710	5	glutamate racemase, molybdopterin biosynthesis protein, putative methyl transferase, peptide chain release, glutamyl-tRNA reductase	PA4662, PA4663, PA4664, PA4665, PA4666	Yes
PA14_08695	PA14_RS03515	operon_1264	1	0	essential gene	C1	set2	secE	preprotein translocase subunit SecE	6.42162	-4.0371	4.52438	-5.73292	6.20939	-6.15734	COG0690	[U] Intracellular trafficking, secretion, and vesicular transport			essential gene		PA14_08695, PA14_08710	2	preprotein translocase subunit, transcription antitermination protein	PA4276, PA4275	Yes
PA14_08710	PA14_RS03520	operon_1264	0	1	non essential gene	C5	set2	nusG	transcription antitermination protein NusG	241.312	-0.383333	232.996	0.171908	520.597	0.659875	COG0250	[K] Transcription		essential gene	essential gene	Core	PA14_08695, PA14_08710	2	preprotein translocase subunit, transcription antitermination protein	PA4276, PA4275	Yes
PA14_08720	PA14_RS03525	operon_1265	1	1	essential gene	C1	set1	rplK	50S ribosomal protein L11	531.289	-3.03894	308.531	-7.01446	185.449	-10.1029	COG0080	[J] Translation, ribosomal structure and biogenesis	essential gene	essential gene	essential gene	Core	PA14_08720, PA14_08730	2	50S ribosomal protein, 50S ribosomal protein	PA4274, PA4273	Yes
PA14_08730	PA14_RS03530	operon_1265	1	1	non essential gene	C5	set2	rplA	50S ribosomal protein L1	363.164	0.481899	393.742	0.671027	486.676	0.882979	COG0081	[J] Translation, ribosomal structure and biogenesis	essential gene	essential gene	essential gene	Core	PA14_08720, PA14_08730	2	50S ribosomal protein, 50S ribosomal protein	PA4274, PA4273	Yes
PA14_08740	PA14_RS03535	operon_1265	1	1	essential gene	C1	set1	rplJ	50S ribosomal protein L10	686.787	-3.04289	414.742	-3.99556	163.127	-4.07188	COG0244	[J] Translation, ribosomal structure and biogenesis		essential gene	essential gene	Core	PA14_08740	1	50S ribosomal protein	PA4272	Yes
PA14_08750	PA14_RS03540	operon_1265	1	1	essential gene	C1	set1	rplL	50S ribosomal protein L7/L12	470.848	-4.6373	283.121	-8.55809	136.424	-10.3808	COG0222	[J] Translation, ribosomal structure and biogenesis	essential gene	essential gene			PA14_08750	1	50S ribosomal protein	PA4271	No
PA14_08760	PA14_RS03545	operon_1265	1	1	non essential gene	C5	set2	rpoB	DNA-directed RNA polymerase subunit beta	555.717	0.252595	623.587	0.561175	850.11	0.935039	COG0085	[K] Transcription	essential gene		essential gene	Core	PA14_08760, PA14_08780	2	DNA-directed RNA polymerase, DNA-directed RNA polymerase	PA4270, PA4269	Yes
PA14_08780	PA14_RS03550	operon_1265	1	1	essential gene	C4	set1	rpoC	DNA-directed RNA polymerase subunit beta'	3193.34	-0.757002	1667.62	-1.32905	1147.02	-2.04931	COG0086	[K] Transcription			essential gene	Core	PA14_08760, PA14_08780	2	DNA-directed RNA polymerase, DNA-directed RNA polymerase	PA4270, PA4269	Yes
PA14_70120	PA14_RS28570	operon_127	1	1	non essential gene	C5	set2		MFS transporter	129.511	0.0682411	124.513	0.1514	286.28	-0.039319	COG0477	[E] Amino acid transport and metabolism					PA14_70120	1	putative MFS transporter	PA5311	No
PA14_70120	PA14_RS28570	operon_127	1	1	non essential gene	C5	set2		MFS transporter	129.511	0.0682411	124.513	0.1514	286.28	-0.039319	COG0477	[G] Carbohydrate transport and metabolism					PA14_70120	1	putative MFS transporter	PA5311	No
PA14_70120	PA14_RS28570	operon_127	1	1	non essential gene	C5	set2		MFS transporter	129.511	0.0682411	124.513	0.1514	286.28	-0.039319	COG0477	[P] Inorganic ion transport and metabolism					PA14_70120	1	putative MFS transporter	PA5311	No
PA14_46450	PA14_RS18855	operon_1283	1	1	non essential gene	C5	set2	aceK	bifunctional isocitrate dehydrogenase kinase/phosphatase	434.901	0.019982	420.088	-0.0389758	928.43	0.0657329	COG4579	[F] Nucleotide transport and metabolism					PA14_46450	1	bifunctional isocitrate dehydrogenase	PA1376	No
PA14_40670	PA14_RS16490	operon_1284	0	1	essential gene	C4	set1	metH	B12-dependent methionine synthase	75.2815	-0.329017	45.8298	-0.734977	23.0379	-1.56698	COG0646	[E] Amino acid transport and metabolism					PA14_40670, PA14_40690	2	B12-dependent methionine synthase, hypothetical protein	PA1843, PA1842	No
PA14_63750	PA14_RS26075	operon_1285	1	1	non essential gene	C5	set2		hypothetical protein	362.463	0.0988961	399.503	0.404346	505.763	0.56588	COG1283	[P] Inorganic ion transport and metabolism		essential gene			PA14_63740, PA14_63750, PA14_63770, PA14_63780	4	NA, hypothetical protein, hypothetical protein, hypothetical protein	NA, PA4822, PA4823, PA4824	No
PA14_72230	PA14_RS29410	operon_1286	1	1	non essential gene	C5	set2		hypothetical protein	911.709	0.198744	958.067	0.259732	1245.25	0.388934	COG1283	[P] Inorganic ion transport and metabolism					PA14_72230	1	hypothetical protein	PA5473	No
PA14_46100	PA14_RS18710	operon_129	1	1	non essential gene	C5	set2		transporter	374.936	0.0971184	346.716	0.0715235	629.992	-0.0162518	COG1457	[U] Intracellular trafficking, secretion, and vesicular transport					PA14_46070, PA14_46080, PA14_46100	3	guanidinobutyrase, hypothetical protein, putative transporter	PA1421, PA1420, PA1419	No
PA14_20070	PA14_RS08040	operon_1291	1	0	non essential gene	C5	set2		hypothetical protein	81.013	-0.0732861	83.1801	0.161663	188.173	0.311461	COG3223	[S] Function unknown					PA14_20070	1	hypothetical protein	PA3403	No
PA14_70720	PA14_RS28795	operon_1292	1	1	non essential gene	C5	set2	ubiC	hypothetical protein	261.837	0.143723	288.426	0.0609446	440.823	0.202277	COG3161	[H] Coenzyme transport and metabolism					PA14_70720, PA14_70730	2	hypothetical protein, 4-hydroxybenzoate octaprenyltransferase	PA5357, PA5358	Yes
PA14_70730	PA14_RS28800	operon_1292	1	1	essential gene	C4	set2	ubiA	4-hydroxybenzoate octaprenyltransferase	3255.6	-0.440546	2545.29	-1.23975	2728.96	-1.98391	COG0382	[H] Coenzyme transport and metabolism			essential gene	Core	PA14_70720, PA14_70730	2	hypothetical protein, 4-hydroxybenzoate octaprenyltransferase	PA5357, PA5358	Yes
PA14_17675	PA14_RS07110	operon_1293	0	1	non essential gene	C5	set2	dgkA	diacylglycerol kinase	342.379	-0.110271	331.331	-0.126857	643.959	-0.222178	COG0818	[M] Cell wall/membrane/envelope biogenesis					PA14_17675	1	diacylglycerol kinase	PA3603	No
PA14_62680	PA14_RS25620	operon_1297	1	1	non essential gene	C5	set2		hypothetical protein	599.085	0.0166081	606.263	0.336912	1061.68	0.380564	COG3237	[S] Function unknown					PA14_62680, PA14_62690	2	hypothetical protein, hypothetical protein	PA4738, PA4739	No
PA14_65110	PA14_RS26620	operon_1298	0	1	non essential gene	C5	set2	alr	biosynthetic alanine racemase	3806.58	0.0294238	3652.01	-0.134559	10468.2	-0.159976	COG0787	[E] Amino acid transport and metabolism					PA14_65110, PA14_65130	2	biosynthetic alanine racemase, replicative DNA helicase	PA4930, PA4931	Yes
PA14_23500	PA14_RS09515	operon_1299	1	1	non essential gene	C5	set2	tyrB	aromatic amino acid aminotransferase	255.205	-0.0728145	244.82	0.0198589	460.331	-0.00572264	COG1448	[E] Amino acid transport and metabolism			essential gene	Conditional	PA14_23500	1	aromatic amino acid	PA3139	Yes
PA14_26650	PA14_RS10800	operon_13	0	0	non essential gene	C5	set2		short chain dehydrogenase	106.429	0.140057	98.8101	-0.343757	193.832	-0.393092	COG1028	[I] Lipid transport and metabolism					PA14_26650	1	short chain dehydrogenase	PA2892	No
PA14_26650	PA14_RS10800	operon_13	0	0	non essential gene	C5	set2		short chain dehydrogenase	106.429	0.140057	98.8101	-0.343757	193.832	-0.393092	COG1028	[Q] Secondary metabolites biosynthesis, transport and catabolism					PA14_26650	1	short chain dehydrogenase	PA2892	No
PA14_67340	PA14_RS27475	operon_130	1	1	non essential gene	C5	set2		cytosine/purines uracil thiamine allantoin permease	271.483	-0.0434996	268.307	-0.0447664	322.642	-0.0488493	COG1457	[U] Intracellular trafficking, secretion, and vesicular transport					PA14_67340	1	putative permease for	PA5099	No
PA14_53010	PA14_RS21585	operon_1300	1	1	non essential gene	C5	set2	phhC	aromatic amino acid aminotransferase	2027.16	0.0695578	2002.5	-0.0466659	3269.01	-0.0903767	COG1448	[E] Amino acid transport and metabolism					PA14_53000, PA14_53010	2	pterin-4-alpha-carbinolamine dehydratase, aromatic amino acid	PA0871, PA0870	No
PA14_35170	PA14_RS14320	operon_1301	1	1	essential gene	C4	set1		redox-sensing activator of soxS	1783.99	-0.957032	1072.49	-1.37999	459.687	-1.35428	COG0789	[K] Transcription	essential gene				PA14_35170	1	putative redox-sensing activator	PA2273	No
PA14_38430	PA14_RS15620	operon_1302	1	1	non essential gene	C5	set2	gnyR	regulatory gene of gnyRDBHAL cluster, GnyR	346.892	0.141757	334.99	0.207964	750.309	0.347926	COG0789	[K] Transcription					PA14_38430	1	regulatory gene of	PA2016	No
PA14_67550	PA14_RS27560	operon_1303	1	0	non essential gene	C5	set2		transcriptional regulator	187.948	0.637178	200.56	0.738056	336.044	0.939098	COG0789	[K] Transcription					PA14_67550	1	putative transcriptional regulator	PA5116	No
PA14_13620	PA14_RS05480	operon_1306	1	0	non essential gene	C5	set2	nhaP	Na+/H+ antiporter NhaP	3.60347	-1.1961	5.72641	1.04175	15.1783	0.692184	COG0025	[P] Inorganic ion transport and metabolism					PA14_13620	1	Na+/H+ antiporter NhaP	PA3887	No
PA14_17010	PA14_RS06825	operon_1307	1	1	non essential gene	C5	set2		Na(+)/H(+) exchanger protein	3795.83	-0.0232154	3806.01	-0.0783332	4371.69	-0.075158	COG0025	[P] Inorganic ion transport and metabolism					PA14_17010	1	putative putative Na(+)/H(+)	PA3660	No
PA14_02810	PA14_RS01130	operon_1310	1	1	non essential gene	C5	set2	pcaT	dicarboxylic acid transporter PcaT	544.03	-0.0272754	552.953	-0.0149887	751.317	0.024791	COG0477	[E] Amino acid transport and metabolism					PA14_02810	1	dicarboxylic acid transporter	PA0229	No
PA14_02810	PA14_RS01130	operon_1310	1	1	non essential gene	C5	set2	pcaT	dicarboxylic acid transporter PcaT	544.03	-0.0272754	552.953	-0.0149887	751.317	0.024791	COG0477	[G] Carbohydrate transport and metabolism					PA14_02810	1	dicarboxylic acid transporter	PA0229	No
PA14_02810	PA14_RS01130	operon_1310	1	1	non essential gene	C5	set2	pcaT	dicarboxylic acid transporter PcaT	544.03	-0.0272754	552.953	-0.0149887	751.317	0.024791	COG0477	[P] Inorganic ion transport and metabolism					PA14_02810	1	dicarboxylic acid transporter	PA0229	No
PA14_16410	PA14_RS06580	operon_1311	1	1	non essential gene	C5	set2		MFS transporter	501.49	0.0444451	537.897	0.134523	1141.57	0.0450591	COG0477	[E] Amino acid transport and metabolism					PA14_16410	1	putative MFS transporter	PA3709	No
PA14_16410	PA14_RS06580	operon_1311	1	1	non essential gene	C5	set2		MFS transporter	501.49	0.0444451	537.897	0.134523	1141.57	0.0450591	COG0477	[G] Carbohydrate transport and metabolism					PA14_16410	1	putative MFS transporter	PA3709	No
PA14_16410	PA14_RS06580	operon_1311	1	1	non essential gene	C5	set2		MFS transporter	501.49	0.0444451	537.897	0.134523	1141.57	0.0450591	COG0477	[P] Inorganic ion transport and metabolism					PA14_16410	1	putative MFS transporter	PA3709	No
PA14_72280	PA14_RS29425	operon_1312	1	0	non essential gene	C5	set2	citA	citrate transporter	203.678	0.583202	197.95	0.810606	247.903	0.962715	COG0477	[G] Carbohydrate transport and metabolism					PA14_72280	1	citrate transporter	PA5476	No
PA14_72280	PA14_RS29425	operon_1312	1	0	non essential gene	C5	set2	citA	citrate transporter	203.678	0.583202	197.95	0.810606	247.903	0.962715	COG0477	[P] Inorganic ion transport and metabolism					PA14_72280	1	citrate transporter	PA5476	No
PA14_72280	PA14_RS29425	operon_1312	1	0	non essential gene	C5	set2	citA	citrate transporter	203.678	0.583202	197.95	0.810606	247.903	0.962715	COG0477	[E] Amino acid transport and metabolism					PA14_72280	1	citrate transporter	PA5476	No
PA14_72960	PA14_RS29695	operon_1313	1	1	non essential gene	C5	set2		MFS dicarboxylate transporter	220.2	0.0446425	215.233	-0.1152	286.76	-0.0914835	COG0477	[E] Amino acid transport and metabolism					PA14_72960	1	putative MFS dicarboxylate	PA5530	No
PA14_72960	PA14_RS29695	operon_1313	1	1	non essential gene	C5	set2		MFS dicarboxylate transporter	220.2	0.0446425	215.233	-0.1152	286.76	-0.0914835	COG0477	[P] Inorganic ion transport and metabolism					PA14_72960	1	putative MFS dicarboxylate	PA5530	No
PA14_72960	PA14_RS29695	operon_1313	1	1	non essential gene	C5	set2		MFS dicarboxylate transporter	220.2	0.0446425	215.233	-0.1152	286.76	-0.0914835	COG0477	[G] Carbohydrate transport and metabolism					PA14_72960	1	putative MFS dicarboxylate	PA5530	No
PA14_57030	PA14_RS23250	operon_1314	1	1	non essential gene	C5	set2	fxsA	FxsA protein	125.99	-0.0517931	129.437	0.0422272	297.281	-0.0206746	COG3030	[S] Function unknown					PA14_57030, PA14_57040	2	ion of, hypothetical protein	PA4387, PA4388	No
PA14_65410	PA14_RS26735	operon_1324	1	0	essential gene	C4	set2	orn	oligoribonuclease	41.0016	-0.711276	22.6966	-1.83722	49.8531	-3.66408	COG1949	[A] RNA processing and modification			essential gene	Conditional	PA14_65410	1	oligoribonuclease	PA4951	Yes
PA14_65270	PA14_RS26685	operon_1325	1	1	essential gene	C2	set1	hflC	protease subunit HflC	1600.79	-1.03824	783.551	-2.52069	290.876	-4.1315	COG0330	[O] Posttranslational modification, protein turnover, chaperones					PA14_65260, PA14_65270, PA14_65280, PA14_65300, PA14_65310	5	hypothetical protein, protease subunit HflC, protease subunit HflK, putative GTP-binding protein, RNA-binding protein Hfq	PA4940, PA4941, PA4942, PA4943, PA4944	Yes
PA14_65280	PA14_RS26690	operon_1325	1	1	non essential gene	C5	set2	hflK	protease subunit HflK	192.925	-0.0873478	211.275	-0.590853	175.107	-0.847212	COG0330	[O] Posttranslational modification, protein turnover, chaperones		essential gene			PA14_65260, PA14_65270, PA14_65280, PA14_65300, PA14_65310	5	hypothetical protein, protease subunit HflC, protease subunit HflK, putative GTP-binding protein, RNA-binding protein Hfq	PA4940, PA4941, PA4942, PA4943, PA4944	Yes
PA14_65300	PA14_RS26695	operon_1325	1	1	non essential gene	C5	set2	hflX	GTP-binding protein	1869.58	-0.162766	1807.76	-0.44943	1964.82	-0.791499	COG2262	[S] Function unknown					PA14_65260, PA14_65270, PA14_65280, PA14_65300, PA14_65310	5	hypothetical protein, protease subunit HflC, protease subunit HflK, putative GTP-binding protein, RNA-binding protein Hfq	PA4940, PA4941, PA4942, PA4943, PA4944	Yes
PA14_65310	PA14_RS26700	operon_1325	1	1	essential gene	C2	set2	hfq	RNA-binding protein Hfq	2278.72	-1.19128	1724.55	-3.51431	1839.24	-5.13862	COG1923	[J] Translation, ribosomal structure and biogenesis	essential gene	essential gene	essential gene	Conditional	PA14_65260, PA14_65270, PA14_65280, PA14_65300, PA14_65310	5	hypothetical protein, protease subunit HflC, protease subunit HflK, putative GTP-binding protein, RNA-binding protein Hfq	PA4940, PA4941, PA4942, PA4943, PA4944	Yes
PA14_65260	PA14_RS26680	operon_1326	0	1	essential gene	C1	set1		hypothetical protein	18.1021	-2.10244	11.9327	-5.52779	8.2347	-5.58723	COG3242	[S] Function unknown	essential gene	essential gene			PA14_65260, PA14_65270, PA14_65280, PA14_65300, PA14_65310	5	hypothetical protein, protease subunit HflC, protease subunit HflK, putative GTP-binding protein, RNA-binding protein Hfq	PA4940, PA4941, PA4942, PA4943, PA4944	Yes
PA14_16150	PA14_RS06470	operon_1328	1	1	non essential gene	C5	set2		hypothetical protein	531.946	0.0824882	577.391	0.266785	1103.52	0.405857	COG1842	[K] Transcription					PA14_16140, PA14_16150	2	hypothetical protein, hypothetical protein	PA3732, PA3731	No
PA14_16150	PA14_RS06470	operon_1328	1	1	non essential gene	C5	set2		hypothetical protein	531.946	0.0824882	577.391	0.266785	1103.52	0.405857	COG1842	[T] Signal transduction mechanisms					PA14_16140, PA14_16150	2	hypothetical protein, hypothetical protein	PA3732, PA3731	No
PA14_60500	PA14_RS24715	operon_1329	1	1	non essential gene	C5	set2	fklB	peptidyl-prolyl cis-trans isomerase FklB	539.948	0.0277492	539.532	0.07006	1237.48	0.142535	COG0545	[G] Carbohydrate transport and metabolism					PA14_60500	1	peptidyl-prolyl cis-trans isomerase	PA4572	No
PA14_68370	PA14_RS27875	operon_1330	1	1	essential gene	C4	set2	cysQ	3'(2'),5'-bisphosphate nucleotidase	199.58	-0.704674	181.812	-0.972841	270.665	-1.22054	COG1218	[P] Inorganic ion transport and metabolism					PA14_68370, PA14_68380	2	3'(2'),5'-bisphosphate nucleotidase, ADP-ribose diphosphatase NudE	PA5175, PA5176	No
PA14_11845	PA14_RS04790	operon_1331	1	1	essential gene	C2	set1	mpl	UDP-N-acetylmuramate:L-alanyl-gamma-D-glutamyl- meso-diaminopimelate ligase	1045.38	-0.461634	505.776	-2.15213	174.5	-4.03805	COG0773	[M] Cell wall/membrane/envelope biogenesis				Conditional	PA14_11845, PA14_11860, PA14_11880	3	UDP-N-acetylmuramate:L-alanyl-gamma-D-glutamyl-, aromatic acid decarboxylase, hypothetical protein	PA4020, PA4019, PA4018	Yes
PA14_26140	PA14_RS10600	operon_1333	1	1	non essential gene	C5	set2		transcriptional regulator	284.773	0.404689	241.924	-0.233308	449.738	0.0299307	COG1309	[K] Transcription					PA14_26140	1	putative transcriptional regulator	PA2931	No
PA14_32500	PA14_RS13260	operon_1334	1	1	non essential gene	C5	set2		TetR family transcriptional regulator	231.134	-0.0525529	225.199	0.0479167	544.093	0.0149846	COG1309	[K] Transcription					PA14_32500	1	TetR family transcriptional	PA2484	No
PA14_14500	PA14_RS05800	operon_1335	0	0	essential gene	C1	set1		hypothetical protein	7.47349	-4.13958	2.79559	-4.90214	0.87478	-3.10598	COG0795	[S] Function unknown		essential gene	essential gene	Core	PA14_14500, PA14_14510	2	hypothetical protein, hypothetical protein	PA3828, PA3827	Yes
PA14_14510	PA14_RS05805	operon_1335	1	0	essential gene	C4	set2		hypothetical protein	76.0618	-0.835851	54.2737	-1.16778	94.1792	-2.33702	COG0795	[S] Function unknown	essential gene	essential gene	essential gene	Core	PA14_14500, PA14_14510	2	hypothetical protein, hypothetical protein	PA3828, PA3827	Yes
PA14_00660	PA14_RS00275	operon_1340	1	0	non essential gene	C5	set2		RNA 2'-phosphotransferase-like protein	25.519	-0.313899	24.4676	0.160333	65.166	0.173017	COG1859	[J] Translation, ribosomal structure and biogenesis					PA14_00660, PA14_00670	2	RNA 2'-phosphotransferase-like protein, hypothetical protein	PA0054, PA0055	No
PA14_25000	PA14_RS10140	operon_1341	1	0	non essential gene	C5	set2		lytic transglycosylase	28.7949	0.100763	33.0247	0.391284	40.0918	0.289482	COG0741	[M] Cell wall/membrane/envelope biogenesis					PA14_25000	1	putative soluble lytic	PA3020	No
PA14_06080	PA14_RS02445	operon_1342	1	1	non essential gene	C5	set2	creD	hypothetical protein	249.832	0.0545016	252.845	-0.306825	378.556	-0.290523	COG4452	[V] Defense mechanisms					PA14_06060, PA14_06070, PA14_06080, PA14_06090	4	DNA-binding response regulator, sensory histidine kinase, hypothetical protein, hypothetical protein	PA0463, PA0464, PA0465, PA0466	No
PA14_14690	PA14_RS05860	operon_1343	1	1	non essential gene	C5	set2		methyltransferase	2000.25	-0.0681327	1933.73	-0.125019	2536.04	-0.337088	COG0565	[J] Translation, ribosomal structure and biogenesis					PA14_14690, PA14_14700	2	putative methyltransferase, serine O-acetyltransferase	PA3817, PA3816	No
PA14_18590	PA14_RS07440	operon_1344	0	1	essential gene	C3	set1		hypothetical protein	0.356314	-1.91231	0.307228	-1.74954			COG3022	[S] Function unknown					PA14_18590	1	hypothetical protein	PA3539	No
PA14_60400	PA14_RS24670	operon_1348	1	0	non essential gene	C5	set2	rpsT	30S ribosomal protein S20	56.9643	0.430813	52.5355	-0.021723	91.0105	0.253297	COG0268	[J] Translation, ribosomal structure and biogenesis	essential gene			Core	PA14_60400	1	30S ribosomal protein	PA4563	Yes
PA14_07710	PA14_RS03085	operon_1349	1	1	non essential gene	C5	set2	apaG	ApaG protein	681.228	0.0541279	687.881	0.0874916	1252.53	0.158243	COG2967	[P] Inorganic ion transport and metabolism					PA14_07700, PA14_07710	2	diadenosine tetraphosphatase, ApaG	PA0590, PA0591	No
PA14_07730	PA14_RS03090	operon_1350	1	1	non essential gene	C5	set2	ksgA	dimethyladenosine transferase	524.944	-0.0428207	491.502	-0.175872	831.626	-0.218692	COG0030	[J] Translation, ribosomal structure and biogenesis					PA14_07730	1	dimethyladenosine transferase	PA0592	No
PA14_07770	PA14_RS03105	operon_1351	1	0	essential gene	C4	set2	ostA	organic solvent tolerance protein OstA	26.6635	-0.29632	21.8465	-1.2541	35.5701	-1.69755	COG1452	[M] Cell wall/membrane/envelope biogenesis			essential gene	Core	PA14_07760, PA14_07770	2	peptidyl-prolyl cis-trans isomerase, organic solvent tolerance	PA0594, PA0595	Yes
PA14_40120	PA14_RS16265	operon_1352	0	1	non essential gene	C5	set2	polB	DNA polymerase II	1283.49	-0.0326434	1299.65	0.0442867	2183.01	0.0706626	COG0417	[L] Replication, recombination and repair					PA14_40120	1	DNA polymerase II	PA1886	No
PA14_23990	PA14_RS09715	operon_1353	0	1	non essential gene	C5	set2	xcpR	general secretion pathway protein E	383.078	0.0421807	411.678	0.136721	486.219	0.282427	COG2804	[N] Cell motility					PA14_23990, PA14_24010	2	general secretion pathway, general secretion pathway	PA3103, PA3102	No
PA14_23990	PA14_RS09715	operon_1353	0	1	non essential gene	C5	set2	xcpR	general secretion pathway protein E	383.078	0.0421807	411.678	0.136721	486.219	0.282427	COG2804	[U] Intracellular trafficking, secretion, and vesicular transport					PA14_23990, PA14_24010	2	general secretion pathway, general secretion pathway	PA3103, PA3102	No
PA14_24010	PA14_RS09720	operon_1353	1	0	non essential gene	C5	set2	xcpS	general secretion pathway protein F	3.57833	1.87263	2.6931	-0.305437	10.7998	0.110341	COG1459	[U] Intracellular trafficking, secretion, and vesicular transport					PA14_23990, PA14_24010	2	general secretion pathway, general secretion pathway	PA3103, PA3102	No
PA14_55430	PA14_RS22585	operon_1354	1	1	non essential gene	C5	set2	hxcS	HxcS	503.464	0.623751	581.829	0.988724	1510.2	1.29675	COG1459	[U] Intracellular trafficking, secretion, and vesicular transport					PA14_55430, PA14_55440, PA14_55450, PA14_55460, PA14_55470, PA14_55480, PA14_55490	7	putative type II, putative type II, putative type II, type II secretion, type II secretion, putative type II, HxcT pseudopilin	PA0687, PA0686, PA0685, PA0684, PA0683, PA0682, PA0681	No
PA14_55440	PA14_RS22590	operon_1354	0	1	non essential gene	C5	set2	hxcR	HxcR	1408.19	0.0114712	1354.96	-0.0301868	1579.22	-0.0397963	COG2804	[N] Cell motility					PA14_55430, PA14_55440, PA14_55450, PA14_55460, PA14_55470, PA14_55480, PA14_55490	7	putative type II, putative type II, putative type II, type II secretion, type II secretion, putative type II, HxcT pseudopilin	PA0687, PA0686, PA0685, PA0684, PA0683, PA0682, PA0681	No
PA14_55440	PA14_RS22590	operon_1354	0	1	non essential gene	C5	set2	hxcR	HxcR	1408.19	0.0114712	1354.96	-0.0301868	1579.22	-0.0397963	COG2804	[U] Intracellular trafficking, secretion, and vesicular transport					PA14_55430, PA14_55440, PA14_55450, PA14_55460, PA14_55470, PA14_55480, PA14_55490	7	putative type II, putative type II, putative type II, type II secretion, type II secretion, putative type II, HxcT pseudopilin	PA0687, PA0686, PA0685, PA0684, PA0683, PA0682, PA0681	No
PA14_59290	PA14_RS24200	operon_1355	1	1	non essential gene	C5	set2	pilQ2	type IV B pilus protein	169.732	0.357474	170.311	0.289407	447.43	0.452662	COG2804	[U] Intracellular trafficking, secretion, and vesicular transport					PA14_59240, PA14_59250, PA14_59270, PA14_59280, PA14_59290, PA14_59310, PA14_59320, PA14_59340, PA14_59350, PA14_59360	10	NA, NA, NA, NA, NA, NA, NA, NA, NA, NA	NA, NA, NA, NA, NA, NA, NA, NA, NA, NA	No
PA14_59290	PA14_RS24200	operon_1355	1	1	non essential gene	C5	set2	pilQ2	type IV B pilus protein	169.732	0.357474	170.311	0.289407	447.43	0.452662	COG2804	[N] Cell motility					PA14_59240, PA14_59250, PA14_59270, PA14_59280, PA14_59290, PA14_59310, PA14_59320, PA14_59340, PA14_59350, PA14_59360	10	NA, NA, NA, NA, NA, NA, NA, NA, NA, NA	NA, NA, NA, NA, NA, NA, NA, NA, NA, NA	No
PA14_59310	PA14_RS24205	operon_1355	1	1	non essential gene	C5	set2	pilR2	type IV B pilus protein	394.968	0.142574	401.541	0.0390657	668.557	0.100797	COG1459	[U] Intracellular trafficking, secretion, and vesicular transport					PA14_59240, PA14_59250, PA14_59270, PA14_59280, PA14_59290, PA14_59310, PA14_59320, PA14_59340, PA14_59350, PA14_59360	10	NA, NA, NA, NA, NA, NA, NA, NA, NA, NA	NA, NA, NA, NA, NA, NA, NA, NA, NA, NA	No
PA14_59310	PA14_RS24205	operon_1355	1	1	non essential gene	C5	set2	pilR2	type IV B pilus protein	394.968	0.142574	401.541	0.0390657	668.557	0.100797	COG1459	[N] Cell motility					PA14_59240, PA14_59250, PA14_59270, PA14_59280, PA14_59290, PA14_59310, PA14_59320, PA14_59340, PA14_59350, PA14_59360	10	NA, NA, NA, NA, NA, NA, NA, NA, NA, NA	NA, NA, NA, NA, NA, NA, NA, NA, NA, NA	No
PA14_58700	PA14_RS23935	operon_1356	1	1	non essential gene	C5	set2	nadC	nicotinate-nucleotide pyrophosphorylase	2287.94	0.0170957	2177.3	0.0256387	5474.48	-0.0105867	COG0157	[H] Coenzyme transport and metabolism				Conditional	PA14_58700	1	nicotinate-nucleotide pyrophosphorylase	PA4524	Yes
PA14_34970	PA14_RS14235	operon_1357	1	1	non essential gene	C5	set2	gcd	glucose dehydrogenase	18574.1	-0.108933	17686.4	-0.155141	21734.6	-0.194612	COG4993	[G] Carbohydrate transport and metabolism					PA14_34970	1	glucose dehydrogenase	PA2290	No
PA14_38860	PA14_RS15790	operon_1358	1	1	non essential gene	C5	set2	exaA	quinoprotein alcohol dehydrogenase	765.804	0.441806	818.909	0.644985	1469.64	0.831555	COG4993	[G] Carbohydrate transport and metabolism					PA14_38860, PA14_38880	2	quinoprotein alcohol dehydrogenase, hypothetical protein	PA1982, PA1981	No
PA14_62600	PA14_RS25585	operon_1359	1	1	non essential gene	C5	set2	panD	aspartate alpha-decarboxylase	311.477	-0.017917	308.101	-0.0270235	339.919	-0.0259925	COG0853	[H] Coenzyme transport and metabolism					PA14_62580, PA14_62590, PA14_62600	3	3-methyl-2-oxobutanoate, pantoate--beta-alanine ligase, ion in bacteria.	PA4729, PA4730, PA4731	Yes
PA14_62580	PA14_RS25575	operon_1360	0	1	essential gene	C4	set2	panB	3-methyl-2-oxobutanoate hydroxymethyltransferase	1010.3	-0.314356	768.89	-1.19504	952.937	-1.64208	COG0413	[H] Coenzyme transport and metabolism				Conditional	PA14_62580, PA14_62590, PA14_62600	3	3-methyl-2-oxobutanoate, pantoate--beta-alanine ligase, ion in bacteria.	PA4729, PA4730, PA4731	Yes
PA14_62590	PA14_RS25580	operon_1360	1	1	essential gene	C4	set1	panC	pantoate--beta-alanine ligase	2580.82	-0.315075	1474.35	-0.692654	478.253	-1.02518	COG0414	[H] Coenzyme transport and metabolism		essential gene	essential gene		PA14_62580, PA14_62590, PA14_62600	3	3-methyl-2-oxobutanoate, pantoate--beta-alanine ligase, ion in bacteria.	PA4729, PA4730, PA4731	Yes
PA14_11070	PA14_RS04465	operon_1361	0	0	non essential gene	C5	set2	cupB2	chaperone CupB2	184.348	-0.225314	181.447	-0.4186	210.087	-0.451633	COG3121	[N] Cell motility					PA14_11060, PA14_11070	2	putative fimbrial subunit, chaperone CupB2	PA4086, PA4085	No
PA14_11070	PA14_RS04465	operon_1361	0	0	non essential gene	C5	set2	cupB2	chaperone CupB2	184.348	-0.225314	181.447	-0.4186	210.087	-0.451633	COG3121	[U] Intracellular trafficking, secretion, and vesicular transport					PA14_11060, PA14_11070	2	putative fimbrial subunit, chaperone CupB2	PA4086, PA4085	No
PA14_11090	PA14_RS04475	operon_1362	1	1	non essential gene	C5	set2	cupB4	chaperone CupB4	414.86	-0.126673	399.668	-0.099296	487.551	-0.115019	COG3121	[N] Cell motility				Conditional	PA14_11080, PA14_11090	2	usher CupB3, chaperone CupB4	PA4084, PA4083	Yes
PA14_11090	PA14_RS04475	operon_1362	1	1	non essential gene	C5	set2	cupB4	chaperone CupB4	414.86	-0.126673	399.668	-0.099296	487.551	-0.115019	COG3121	[U] Intracellular trafficking, secretion, and vesicular transport				Conditional	PA14_11080, PA14_11090	2	usher CupB3, chaperone CupB4	PA4084, PA4083	Yes
PA14_37000	PA14_RS15065	operon_1363	1	1	non essential gene	C5	set2	cupA5	chaperone CupA5	291.451	0.00219758	313.063	0.237682	432.18	0.232102	COG3121	[N] Cell motility					PA14_36990, PA14_37000, PA14_37010, PA14_37030, PA14_37040, PA14_37060	6	EAL domain-containing protein, chaperone CupA5, fimbrial subunit CupA4, usher, chaperone CupA2, fimbrial subunit CupA1	PA2133, PA2132, PA2131, PA2130, PA2129, PA2128	No
PA14_37000	PA14_RS15065	operon_1363	1	1	non essential gene	C5	set2	cupA5	chaperone CupA5	291.451	0.00219758	313.063	0.237682	432.18	0.232102	COG3121	[U] Intracellular trafficking, secretion, and vesicular transport					PA14_36990, PA14_37000, PA14_37010, PA14_37030, PA14_37040, PA14_37060	6	EAL domain-containing protein, chaperone CupA5, fimbrial subunit CupA4, usher, chaperone CupA2, fimbrial subunit CupA1	PA2133, PA2132, PA2131, PA2130, PA2129, PA2128	No
PA14_37040	PA14_RS15080	operon_1364	1	1	non essential gene	C5	set2	cupA2	chaperone CupA2	978.912	0.113208	1008.23	0.137863	1227.18	0.0908082	COG3121	[N] Cell motility					PA14_36990, PA14_37000, PA14_37010, PA14_37030, PA14_37040, PA14_37060	6	EAL domain-containing protein, chaperone CupA5, fimbrial subunit CupA4, usher, chaperone CupA2, fimbrial subunit CupA1	PA2133, PA2132, PA2131, PA2130, PA2129, PA2128	No
PA14_37040	PA14_RS15080	operon_1364	1	1	non essential gene	C5	set2	cupA2	chaperone CupA2	978.912	0.113208	1008.23	0.137863	1227.18	0.0908082	COG3121	[U] Intracellular trafficking, secretion, and vesicular transport					PA14_36990, PA14_37000, PA14_37010, PA14_37030, PA14_37040, PA14_37060	6	EAL domain-containing protein, chaperone CupA5, fimbrial subunit CupA4, usher, chaperone CupA2, fimbrial subunit CupA1	PA2133, PA2132, PA2131, PA2130, PA2129, PA2128	No
PA14_51460	PA14_RS20925	operon_1365	0	0	non essential gene	C5	set2	cupC2	chaperone CupC	156.608	0.0281086	167.441	0.67039	207.998	0.993357	COG3121	[M] Cell wall/membrane/envelope biogenesis			essential gene		PA14_51450, PA14_51460, PA14_51470	3	usher CupC3, chaperone CupC, fimbrial subunit CupC1	PA0994, PA0993, PA0992	No
PA14_59720	PA14_RS24360	operon_1366	1	1	non essential gene	C5	set2	cupD2	pili assembly chaperone	243.588	-0.237962	218.913	-0.237317	511.259	-0.360014	COG3121	[U] Intracellular trafficking, secretion, and vesicular transport					PA14_59720	1	NA	NA	No
PA14_59720	PA14_RS24360	operon_1366	1	1	non essential gene	C5	set2	cupD2	pili assembly chaperone	243.588	-0.237962	218.913	-0.237317	511.259	-0.360014	COG3121	[N] Cell motility					PA14_59720	1	NA	NA	No
PA14_59760	PA14_RS24375	operon_1367	1	1	non essential gene	C5	set2	cupD5	pili assembly chaperone	308.732	0.128223	325.978	0.0240274	544.451	0.193686	COG3121	[N] Cell motility					PA14_59750, PA14_59760	2	NA, NA	NA, NA	No
PA14_59760	PA14_RS24375	operon_1367	1	1	non essential gene	C5	set2	cupD5	pili assembly chaperone	308.732	0.128223	325.978	0.0240274	544.451	0.193686	COG3121	[U] Intracellular trafficking, secretion, and vesicular transport					PA14_59750, PA14_59760	2	NA, NA	NA, NA	No
PA14_11060	PA14_RS04460	operon_1368	1	0	non essential gene	C5	set2	cupB1	fimbrial subunit CupB1	43.3553	0.446454	38.6119	-0.287105	101.249	-0.0610102	COG3539	[N] Cell motility					PA14_11060, PA14_11070	2	putative fimbrial subunit, chaperone CupB2	PA4086, PA4085	No
PA14_11060	PA14_RS04460	operon_1368	1	0	non essential gene	C5	set2	cupB1	fimbrial subunit CupB1	43.3553	0.446454	38.6119	-0.287105	101.249	-0.0610102	COG3539	[U] Intracellular trafficking, secretion, and vesicular transport					PA14_11060, PA14_11070	2	putative fimbrial subunit, chaperone CupB2	PA4086, PA4085	No
PA14_37060	PA14_RS15085	operon_1369	1	1	non essential gene	C5	set2	cupA1	fimbrial subunit CupA1	742.379	0.0201317	753.676	-0.0043368	890.672	0.0491236	COG3539	[N] Cell motility					PA14_36990, PA14_37000, PA14_37010, PA14_37030, PA14_37040, PA14_37060	6	EAL domain-containing protein, chaperone CupA5, fimbrial subunit CupA4, usher, chaperone CupA2, fimbrial subunit CupA1	PA2133, PA2132, PA2131, PA2130, PA2129, PA2128	No
PA14_37060	PA14_RS15085	operon_1369	1	1	non essential gene	C5	set2	cupA1	fimbrial subunit CupA1	742.379	0.0201317	753.676	-0.0043368	890.672	0.0491236	COG3539	[U] Intracellular trafficking, secretion, and vesicular transport					PA14_36990, PA14_37000, PA14_37010, PA14_37030, PA14_37040, PA14_37060	6	EAL domain-containing protein, chaperone CupA5, fimbrial subunit CupA4, usher, chaperone CupA2, fimbrial subunit CupA1	PA2133, PA2132, PA2131, PA2130, PA2129, PA2128	No
PA14_59710	PA14_RS24355	operon_1370	1	0	non essential gene	C5	set2	cupD1	fimbrial protein	56.2302	-0.0194245	54.0944	-0.0876841	74.3608	-0.19726	COG3539	[N] Cell motility					PA14_59710	1	NA	NA	No
PA14_59710	PA14_RS24355	operon_1370	1	0	non essential gene	C5	set2	cupD1	fimbrial protein	56.2302	-0.0194245	54.0944	-0.0876841	74.3608	-0.19726	COG3539	[U] Intracellular trafficking, secretion, and vesicular transport					PA14_59710	1	NA	NA	No
PA14_62560	PA14_RS25565	operon_1371	1	1	non essential gene	C5	set2	pcnB	poly(A) polymerase	544.142	-0.279477	529.8	-0.193652	676.799	-0.0787304	COG0617	[H] Coenzyme transport and metabolism		essential gene			PA14_62560, PA14_62570	2	poly(A) polymerase, 2-amino-4-hydroxy-6-	PA4727, PA4728	Yes
PA14_62570	PA14_RS25570	operon_1371	1	1	non essential gene	C5	set2	folK	2-amino-4-hydroxy-6- hydroxymethyldihydropteridine pyrophosphokinase	1489.18	0.0404294	1482.32	0.0145916	1589.29	0.0480203	COG0801	[H] Coenzyme transport and metabolism		essential gene	essential gene	Core	PA14_62560, PA14_62570	2	poly(A) polymerase, 2-amino-4-hydroxy-6-	PA4727, PA4728	Yes
PA14_17040	PA14_RS06835	operon_1386	1	1	non essential gene	C5	set2	glnD	PII uridylyl-transferase	1336.62	-0.0746012	1297.02	0.0406952	1483.51	0.0971826	COG2844	[O] Posttranslational modification, protein turnover, chaperones					PA14_17030, PA14_17040	2	succinyldiaminopimelate transaminase, PII uridylyl-transferase	PA3659, PA3658	No
PA14_51900	PA14_RS21125	operon_1388	0	0	essential gene	C1	set1	proS	prolyl-tRNA synthetase	10.0338	-3.34213	2.29014	-4.60273	1.08897	-3.42268	COG0442	[J] Translation, ribosomal structure and biogenesis	essential gene		essential gene	Core	PA14_51900, PA14_51910	2	prolyl-tRNA synthetase, hypothetical protein	PA0956, PA0955	Yes
PA14_41060	PA14_RS16640	operon_1390	1	0	essential gene	C2	set1	rnhA	ribonuclease H	325.496	-1.86931	162.662	-4.98401	78.8067	-8.16713	COG0328	[L] Replication, recombination and repair	essential gene	essential gene	essential gene	Conditional	PA14_41060, PA14_41070	2	ribonuclease H, hypothetical protein	PA1815, PA1814	Yes
PA14_27730	PA14_RS11245	operon_1391	1	1	non essential gene	C5	set2	fadE	acyl-CoA dehydrogenase	1220.8	-0.0808789	1166.77	-0.2238	2260.89	-0.349134	COG1960	[I] Lipid transport and metabolism					PA14_27730	1	acyl-CoA dehydrogenase	PA2815	No
PA14_30500	PA14_RS12440	operon_1392	1	1	non essential gene	C5	set2		acyl-CoA dehydrogenase	230.541	-0.0496411	227.321	-0.0612699	353.036	-0.144956	COG1960	[I] Lipid transport and metabolism					PA14_30460, PA14_30470, PA14_30490, PA14_30500	4	putative flavin-dependent oxidoreductase, putative periplasmic aliphatic, putative lavin-dependent oxidoreductase, putative acyl-CoA dehydrogenase	PA2600, PA2599, PA2598, PA2597	No
PA14_34200	PA14_RS13945	operon_1393	1	0	non essential gene	C5	set2		FMNH2-dependent monooxygenase	9.11666	-0.689827	7.32137	0.235235	15.7352	-0.425729	COG1960	[I] Lipid transport and metabolism					PA14_34180, PA14_34190, PA14_34200, PA14_34210	4	NADH-dependent FMN reductase, methanesulfonate sulfonatase MsuD, putative FMNH2-dependent monooxygenase, putative transcriptional regulator	PA2357, PA2356, PA2355, PA2354	No
PA14_34300	PA14_RS13985	operon_1394	1	0	non essential gene	C5	set2		DszC family monooxygenase	44.7385	0.199434	48.5859	0.545961	93.284	0.612573	COG1960	[I] Lipid transport and metabolism		essential gene			PA14_34260, PA14_34270, PA14_34280, PA14_34290, PA14_34300, PA14_34320	6	putative permease of, putative ATP-binding component, hypothetical protein, DszA family monooxygenase, DszC family monooxygenase, DszC family monooxygenase	PA2351, PA2350, PA2349, PA2348, PA2347, PA2346	No
PA14_34550	PA14_RS14075	operon_1396	0	1	non essential gene	C5	set2		hypothetical protein	7293.09	-0.0370531	7202.87	-0.0495985	8548.65	-0.0352782	COG1960	[I] Lipid transport and metabolism					PA14_34550, PA14_34580	2	hypothetical protein, hypothetical protein	PA2325, PA2324	No
PA14_34580	PA14_RS14080	operon_1397	1	1	non essential gene	C5	set2		hypothetical protein	138.772	0.191965	130.487	0.113605	289.402	0.107602	COG1960	[I] Lipid transport and metabolism	essential gene				PA14_34550, PA14_34580	2	hypothetical protein, hypothetical protein	PA2325, PA2324	No
PA14_15840	PA14_RS06340	operon_1398	1	0	non essential gene	C5	set2		hypothetical protein	76.9174	-0.0905426	84.6499	-0.108346	105.344	-0.194663	COG3034	[S] Function unknown					PA14_15840	1	hypothetical protein	PA3756	No
PA14_42500	PA14_RS17250	operon_1399	1	0	non essential gene	C5	set2	pcrD	type III secretory apparatus protein PcrD	109.247	0.157541	114.8	0.402022	144.811	0.411262	COG4789	[U] Intracellular trafficking, secretion, and vesicular transport					PA14_42440, PA14_42450, PA14_42460, PA14_42470, PA14_42480, PA14_42490, PA14_42500, PA14_42510, PA14_42520, PA14_42530, PA14_42540, PA14_42550	12	translocator outer membrane, translocator protein PopB, regulatory protein PcrH, type III secretion, regulator in type, transcriptional regulator protein, type III secretory, hypothetical protein, hypothetical protein, putative type III, putative protein in, Type III secretion	PA1709, PA1708, PA1707, PA1706, PA1705, PA1704, PA1703, PA1702, PA1701, PA1700, PA1699, PA1698	No
PA14_26730	PA14_RS10825	operon_14	1	1	non essential gene	C5	set2		short-chain dehydrogenase	5843.17	-0.110752	5659.4	-0.212157	6540.35	-0.277124	COG1028	[I] Lipid transport and metabolism					PA14_26720, PA14_26730	2	putative biotin-dependent carboxylase, putative short-chain dehydrogenase	PA2888, PA2887	No
PA14_26730	PA14_RS10825	operon_14	1	1	non essential gene	C5	set2		short-chain dehydrogenase	5843.17	-0.110752	5659.4	-0.212157	6540.35	-0.277124	COG1028	[Q] Secondary metabolites biosynthesis, transport and catabolism					PA14_26720, PA14_26730	2	putative biotin-dependent carboxylase, putative short-chain dehydrogenase	PA2888, PA2887	No
PA14_45680	PA14_RS18545	operon_1400	1	1	essential gene	C3	set1	flhA	flagellar biosynthesis protein FlhA	4889.8	-1.57305	3052.87	-1.68856	2348.62	-1.27247	COG1298	[N] Cell motility					PA14_45680	1	flagellar biosynthesis protein	PA1452	No
PA14_31200	PA14_RS12770	operon_1401	1	0	non essential gene	C5	set2		hypothetical protein	27.4599	-0.198435	33.3715	-0.34919	42.7708	-0.517882	COG1961	[L] Replication, recombination and repair					PA14_31200	1	NA	NA	No
PA14_68340	PA14_RS27860	operon_1409	1	0	non essential gene	C5	set2	arcB	ornithine carbamoyltransferase	39.9093	0.109323	46.8375	0.48334	90.0368	0.408055	COG0078	[E] Amino acid transport and metabolism					PA14_68330, PA14_68340, PA14_68350	3	arginine deiminase, ornithine carbamoyltransferase, carbamate kinase	PA5171, PA5172, PA5173	No
PA14_17710	PA14_RS07125	operon_1411	1	1	non essential gene	C5	set2	rpmJ2	RpmJ2	1104.99	0.383373	1198.79	0.576175	3103.02	0.780568	COG0257	[J] Translation, ribosomal structure and biogenesis		essential gene			PA14_17700, PA14_17710	2	50S ribosomal protein, 50S ribosomal protein	PA3601, PA3600	No
PA14_35490	PA14_RS14435	operon_1412	1	1	non essential gene	C5	set2	lpdV	dihydrolipoamide dehydrogenase	518.87	0.173491	611.382	0.729594	928.854	1.32858	COG1249	[C] Energy production and conversion					PA14_35490, PA14_35500, PA14_35520, PA14_35530	4	dihydrolipoamide dehydrogenase, branched-chain alpha-keto acid, 2-oxoisovalerate dehydrogenase subunit, 2-oxoisovalerate dehydrogenase (alpha	PA2250, PA2249, PA2248, PA2247	No
PA14_43970	PA14_RS17860	operon_1413	1	1	essential gene	C3	set1	lpdG	dihydrolipoamide dehydrogenase	2324.74	-1.21676	1235.48	-1.83857	846.689	-1.67439	COG1249	[C] Energy production and conversion		essential gene	essential gene	Core	PA14_43970	1	dihydrolipoamide dehydrogenase	PA1587	Yes
PA14_63850	PA14_RS26110	operon_1414	1	1	non essential gene	C5	set2	lpd3	dihydrolipoamide dehydrogenase	420.187	0.12401	427.974	0.185796	543.229	0.203055	COG1249	[C] Energy production and conversion					PA14_63850	1	dihydrolipoamide dehydrogenase	PA4829	No
PA14_16960	PA14_RS06800	operon_1415	0	0	non essential gene	C5	set2		amino acid transporter LysE	7.22381	0.691239	6.62594	0.337244	9.84571	-0.391276	COG1280	[E] Amino acid transport and metabolism					PA14_16960, PA14_16970	2	amino acid transporter, arsenate reductase glutaredoxin	PA3665, PA3664	No
PA14_26160	PA14_RS10610	operon_1416	1	1	non essential gene	C5	set2		hypothetical protein	211.939	-0.114012	211.387	-0.146031	418.785	-0.231375	COG1280	[E] Amino acid transport and metabolism					PA14_26160, PA14_26165	2	hypothetical protein, hypothetical protein	PA2929, PA2928	No
PA14_29100	PA14_RS11860	operon_1417	1	1	non essential gene	C5	set2		hypothetical protein	173.578	0.260774	203.483	0.723587	523.454	1.0402	COG1280	[E] Amino acid transport and metabolism					PA14_29100, PA14_29110	2	hypothetical protein, cysteine synthase A	PA2710, PA2709	No
PA14_58500	PA14_RS23850	operon_1419	1	0	non essential gene	C5	set2		hypothetical protein	149.676	0.0786811	128.895	0.0947224	177.35	0.0371607	COG1280	[E] Amino acid transport and metabolism					PA14_58500	1	hypothetical protein	PA4507	No
PA14_62920	PA14_RS25725	operon_1420	1	1	essential gene	C4	set1		leucine export protein LeuE	13479.1	-0.612323	6466.65	-1.71681	3055.01	-2.87392	COG1280	[E] Amino acid transport and metabolism					PA14_62920, PA14_62930	2	leucine export protein, ion of carbamoyl	PA4757, PA4758	Yes
PA14_69310	PA14_RS28250	operon_1421	0	1	non essential gene	C5	set2		LysE family efflux protein	1784.89	0.0639615	1750.4	-0.0742598	4005.33	-0.135892	COG1280	[E] Amino acid transport and metabolism					PA14_69310	1	LysE family efflux	PA5249	No
PA14_70510	PA14_RS28715	operon_1422	1	0	non essential gene	C5	set2		hypothetical protein	114.696	-0.125078	106.573	-0.298025	160.776	-0.137437	COG1280	[E] Amino acid transport and metabolism					PA14_70510	1	hypothetical protein	PA5341	No
PA14_69240	PA14_RS28220	operon_1424	0	1	essential gene	C2	set2	hemB	delta-aminolevulinic acid dehydratase	133.047	-1.0587	90.032	-4.07075	217.7	-7.38198	COG0113	[H] Coenzyme transport and metabolism			essential gene	Conditional	PA14_69240	1	delta-aminolevulinic acid dehydratase	PA5243	Yes
PA14_09600	PA14_RS03890	operon_1425	0	1	non essential gene	C5	set2	ddlA	D-alanine--D-alanine ligase	455.281	0.174797	475.5	0.385555	858.857	0.54986	COG1181	[F] Nucleotide transport and metabolism					PA14_09600	1	D-alanine-D-alanine ligase A	PA4201	No
PA14_05150	PA14_RS02090	operon_1427	1	1	non essential gene	C5	set2	proC	pyrroline-5-carboxylate reductase	242.208	0.340791	248.18	0.481121	385.067	0.506711	COG0345	[E] Amino acid transport and metabolism				Conditional	PA14_05130, PA14_05150, PA14_05160	3	hypothetical protein, pyrroline-5-carboxylate reductase, hypothetical protein	PA0392, PA0393, PA0394	Yes
PA14_21790	PA14_RS08785	operon_1428	1	1	non essential gene	C5	set2	rdgC	recombination associated protein	165.23	0.530201	187.024	0.661646	472.61	0.948798	COG2974	[L] Replication, recombination and repair					PA14_21790	1	recombination associated protein	PA3263	No
PA14_55640	PA14_RS22705	operon_1434	1	1	non essential gene	C5	set2	sbcD	exonuclease SbcD	149.286	0.0658025	138.107	-0.103778	256.901	-0.336873	COG0420	[L] Replication, recombination and repair					PA14_55640, PA14_55650	2	exonuclease SbcD, putative exonuclease	PA4281, PA4282	No
PA14_55650	PA14_RS22710	operon_1434	1	1	non essential gene	C5	set2	sbcC	exonuclease	2174.59	-0.011675	2118.49	-0.0242911	4104.39	0.0360375	COG0419	[L] Replication, recombination and repair					PA14_55640, PA14_55650	2	exonuclease SbcD, putative exonuclease	PA4281, PA4282	No
PA14_56600	PA14_RS23070	operon_1435	1	1	non essential gene	C5	set2		hypothetical protein	690.431	-0.0497994	646.679	0.0907193	1530.81	0.0479288	COG3124	[S] Function unknown					PA14_56600	1	hypothetical protein	PA4353	No
PA14_01770	PA14_RS00730	operon_1436	1	1	non essential gene	C5	set2		nucleoside-binding outer membrane protein	506.08	0.13191	540.954	0.237232	944.288	0.414332	COG3248	[M] Cell wall/membrane/envelope biogenesis					PA14_01770, PA14_01780	2	NA, putative nucleoside 2-deoxyribosyltransferase	NA, PA0144	No
PA14_02060	PA14_RS00845	operon_1437	0	0	non essential gene	C5	set2		hypothetical protein	85.8319	0.0494768	91.4131	0.125846	207.32	0.109952	COG3248	[M] Cell wall/membrane/envelope biogenesis					PA14_02060	1	hypothetical protein	PA0165	No
PA14_02890	PA14_RS01155	operon_1438	1	1	non essential gene	C5	set2		hypothetical protein	1038.09	0.0887508	1084.41	0.240226	2326.59	0.317407	COG3248	[M] Cell wall/membrane/envelope biogenesis					PA14_02890	1	hypothetical protein	PA0234	No
PA14_11550	PA14_RS04670	operon_1439	1	1	non essential gene	C5	set2	dxs	1-deoxy-D-xylulose-5-phosphate synthase	206.132	0.284521	213.333	0.710357	297.546	1.01902	COG1154	[H] Coenzyme transport and metabolism	essential gene		essential gene	Core	PA14_11550	1	1-deoxy-D-xylulose-5-phosphate synthase	PA4044	Yes
PA14_51670	PA14_RS21025	operon_1442	1	1	non essential gene	C5	set2		hypothetical protein	682.262	0.0565953	700.118	0.194711	1282.7	0.336587	COG0603	[F] Nucleotide transport and metabolism					PA14_51670, PA14_51680	2	hypothetical protein, radical activating enzyme	PA0976, PA0975	No
PA14_12870	PA14_RS05185	operon_1443	1	1	non essential gene	C5	set2	tesB	acyl-CoA thioesterase	1558.98	0.0587316	1617.49	0.221583	2012.79	0.318289	COG1946	[I] Lipid transport and metabolism					PA14_12850, PA14_12860, PA14_12870, PA14_12890	4	acetyltransferase, hypothetical protein, acyl-CoA thioesterase II, hypothetical protein	PA3944, PA3943, PA3942, PA3941	No
PA14_57080	PA14_RS23275	operon_1444	1	1	essential gene	C3	set2		hypothetical protein	1385.25	-1.53612	1099.91	-3.22111	1317.53	-3.98718	COG3695	[L] Replication, recombination and repair					PA14_57080	1	hypothetical protein	PA4392	No
PA14_72800	PA14_RS29635	operon_1451	0	1	non essential gene	C5	set2		potassium efflux transporter	329.914	-0.0592608	339.462	-0.0518824	395.456	-0.0245776	COG1226	[P] Inorganic ion transport and metabolism					PA14_72790, PA14_72800	2	hypothetical protein, putative potassium efflux	PA5517, PA5518	No
PA14_72940	PA14_RS29690	operon_1452	0	1	non essential gene	C5	set2		sodium/proton antiporter	675.598	-0.119324	675.363	-0.0745959	813.596	-0.207035	COG0475	[P] Inorganic ion transport and metabolism					PA14_72940	1	putative sodium/proton antiporter	PA5529	No
PA14_17990	PA14_RS07225	operon_1455	1	1	non essential gene	C5	set2		hypothetical protein	635.782	0.152819	618.759	0.197194	824.422	0.29773	COG2606	[S] Function unknown					PA14_17990	1	hypothetical protein	PA3580	No
PA14_11340	PA14_RS04590	operon_1456	1	1	non essential gene	C5	set2		thioredoxin	4811.04	0.0625346	5125.6	0.104118	9976.81	0.218466	COG3118	[O] Posttranslational modification, protein turnover, chaperones					PA14_11340	1	putative thioredoxin	PA4061	No
PA14_41390	PA14_RS16785	operon_1458	1	0	essential gene	C4	set2	ppiB	peptidyl-prolyl cis-trans isomerase B	88.5688	0.335	49.9532	-1.96159	96.4565	-3.34528	COG0652	[G] Carbohydrate transport and metabolism					PA14_41390	1	peptidyl-prolyl cis-trans isomerase	PA1793	No
PA14_41400	PA14_RS16790	operon_1458	0	0	non essential gene	C5	set2		UDP-2,3-diacylglucosamine hydrolase	90.9021	-0.37987	89.3968	-0.176191	133.579	-0.381395	COG2908	[S] Function unknown	essential gene	essential gene	essential gene	Core	PA14_41400	1	UDP-2,3-diacylglucosamine hydrolase	PA1792	Yes
PA14_19230	PA14_RS07705	operon_1470	0	1	non essential gene	C5	set2		hypothetical protein	4251.65	-0.161925	3933.44	-0.130134	4582.87	-0.250955	COG0668	[M] Cell wall/membrane/envelope biogenesis					PA14_19205, PA14_19210, PA14_19230	3	hypothetical protein, hypothetical protein, hypothetical protein	PA3470, PA3469, PA3468	No
PA14_36370	PA14_RS14800	operon_1472	0	1	non essential gene	C5	set2		carboxylate-amine ligase	1037.05	-0.0404509	1042.98	0.104909	2658.48	0.182134	COG2170	[H] Coenzyme transport and metabolism					PA14_36360, PA14_36370	2	hypothetical protein, carboxylate-amine ligase	PA2187, PA2181	No
PA14_10170	PA14_RS04105	operon_1473	0	1	essential gene	C3	set2	fepB	iron-enterobactin transporter periplasmic binding protein	355.279	-1.13008	298.551	-1.91043	450.887	-2.38103	COG4592	[P] Inorganic ion transport and metabolism					PA14_10140, PA14_10160, PA14_10170	3	ferric enterobactin transport, ferric enterobactin transport, iron-enterobactin transporter periplasmic	PA4161, PA4160, PA4159	No
PA14_32610	PA14_RS13300	operon_1485	1	1	non essential gene	C5	set2	dsbG	disulfide isomerase/thiol-disulfide oxidase	4712.29	-0.0773946	4724.67	-0.093894	5506.22	-0.12825	COG1651	[O] Posttranslational modification, protein turnover, chaperones					PA14_32610	1	disulfide isomerase/thiol-disulfide oxidase	PA2476	No
PA14_69630	PA14_RS28385	operon_1487	1	1	non essential gene	C5	set2	rnk	nucleoside diphosphate kinase regulator	668.784	-0.00504687	686.145	0.0921412	919.485	0.0643332	COG0782	[K] Transcription					PA14_69630	1	nucleoside diphosphate kinase	PA5274	No
PA14_46550	PA14_RS18900	operon_1488	1	1	non essential gene	C5	set2		ribonuclease	132.642	-0.00188245	121.162	-0.109591	287.317	-0.232934	COG3719	[J] Translation, ribosomal structure and biogenesis					PA14_46540, PA14_46550	2	NA, NA	NA, NA	No
PA14_56980	PA14_RS23230	operon_1489	1	1	non essential gene	C5	set2		camphor resistance protein CrcB	1105.92	0.0857166	1099.66	0.122163	2067.39	0.10414	COG0239	[D] Cell cycle control, cell division, chromosome partitioning					PA14_56970, PA14_56980	2	NA, hypothetical protein	NA, PA4383	No
PA14_32130	PA14_RS13110	operon_15	1	1	non essential gene	C5	set2	benD	1,6-dihydroxycyclohexa-2,4-diene-1-carboxylate dehydrogenase	256.181	-0.01497	269.577	0.0784455	306.752	0.142108	COG1028	[I] Lipid transport and metabolism				Conditional	PA14_32130	1	NA	NA	Yes
PA14_32130	PA14_RS13110	operon_15	1	1	non essential gene	C5	set2	benD	1,6-dihydroxycyclohexa-2,4-diene-1-carboxylate dehydrogenase	256.181	-0.01497	269.577	0.0784455	306.752	0.142108	COG1028	[Q] Secondary metabolites biosynthesis, transport and catabolism				Conditional	PA14_32130	1	NA	NA	Yes
PA14_12120	PA14_RS04905	operon_1502	1	1	non essential gene	C5	set2	lipB	lipoate-protein ligase B	691.144	-0.252012	640.515	-0.580212	686.036	-0.602994	COG0321	[H] Coenzyme transport and metabolism	essential gene	essential gene	essential gene	Core	PA14_12110, PA14_12120	2	hypothetical protein, lipoyltransferase	PA3998, PA3997	Yes
PA14_12110	PA14_RS04900	operon_1503	1	1	essential gene	C2	set1		hypothetical protein	84.5669	-1.61084	47.2261	-4.90583	26.8605	-7.31248	COG2921	[S] Function unknown	essential gene	essential gene			PA14_12110, PA14_12120	2	hypothetical protein, lipoyltransferase	PA3998, PA3997	Yes
PA14_12090	PA14_RS04890	operon_1505	0	1	essential gene	C1	set1		RlpA family lipoprotein	4.40473	-3.92307	4.23537	-4.73335	1.25196	-1.88181	COG0797	[M] Cell wall/membrane/envelope biogenesis					PA14_12080, PA14_12090	2	soluble lytic transglycosylase, RlpA family lipoprotein	PA4001, PA4000	No
PA14_12350	PA14_RS04990	operon_1507	1	1	non essential gene	C5	set2		(dimethylallyl)adenosine tRNA methylthiotransferase	557.174	0.0416765	566.709	0.0285325	871.364	0.0329426	COG0621	[J] Translation, ribosomal structure and biogenesis					PA14_12350	1	hypothetical protein	PA3980	No
PA14_13650	PA14_RS05490	operon_1511	1	1	non essential gene	C5	set2		hypothetical protein	4353.71	-0.172315	4038.77	-0.382541	4590.32	-0.547494	COG0647	[G] Carbohydrate transport and metabolism					PA14_13630, PA14_13650	2	NA, hypothetical protein	NA, PA3886	No
PA14_48850	PA14_RS19835	operon_1513	1	1	non essential gene	C5	set2		amino acid permease	133.419	-0.404733	114.735	-0.325659	219.831	-0.307736	COG0531	[E] Amino acid transport and metabolism					PA14_48840, PA14_48850	2	hypothetical protein, amino acid permease	PA1195, PA1194	No
PA14_63480	PA14_RS25975	operon_1514	1	0	essential gene	C4	set1		amino acid permease	890.208	-0.0591149	617.273	-0.605368	274.367	-1.57456	COG0531	[E] Amino acid transport and metabolism					PA14_63480, PA14_63500	2	putative amino acid, hypothetical protein	PA4804, PA4805	No
PA14_68300	PA14_RS27850	operon_1515	1	1	non essential gene	C5	set2	arcD	arginine/ornithine antiporter	583.846	0.425098	589.72	0.803732	836.418	1.029	COG0531	[E] Amino acid transport and metabolism					PA14_68300	1	arginine/ornithine antiporter	PA5170	No
PA14_62860	PA14_RS25695	operon_153	1	1	non essential gene	C5	set2	ftsH	cell division protein FtsH	1229.78	-0.0670242	1118.44	-0.155368	1178.71	-0.22199	COG0465	[O] Posttranslational modification, protein turnover, chaperones		essential gene	essential gene	Conditional	PA14_62840, PA14_62850, PA14_62860	3	phosphoglucosamine mutase, dihydropteroate synthase, cell division protein	PA4749, PA4750, PA4751	Yes
PA14_54580	PA14_RS22210	operon_1533	1	1	essential gene	C4	set1		hypothetical protein	1493.78	-0.360382	711.161	-0.932956	429.095	-1.51402	COG3180	[S] Function unknown					PA14_54520, PA14_54540, PA14_54550, PA14_54570, PA14_54580	5	porin, hypothetical protein, hypothetical protein, hypothetical protein, hypothetical protein	PA0755, PA0754, PA0753, PA0752, PA0751	No
PA14_44070	PA14_RS17895	operon_1534	1	0	essential gene	C4	set1	gltA	type II citrate synthase	1321	-0.974642	678.32	-1.48716	228.542	-1.58612	COG0372	[C] Energy production and conversion				Conditional	PA14_44070	1	type II citrate	PA1580	Yes
PA14_53950	PA14_RS21975	operon_1535	1	1	non essential gene	C5	set2	prpC	methylcitrate synthase	338.753	0.0848485	374.732	0.269144	664.894	0.431614	COG0372	[C] Energy production and conversion					PA14_53950	1	methylcitrate synthase	PA0795	No
PA14_04650	PA14_RS01885	operon_154	0	1	non essential gene	C5	set2	pfpI	protease PfpI	1526.3	-0.0965278	1551.19	-0.0359691	1920.09	-0.125552	COG0693	[S] Function unknown					PA14_04640, PA14_04650	2	hypothetical protein, protease PfpI	PA0354, PA0355	No
PA14_36680	PA14_RS14930	operon_1544	1	1	essential gene	C2	set1		hypothetical protein	1462.9	-1.15955	759.815	-2.93134	248.684	-4.52414	COG3568	[L] Replication, recombination and repair					PA14_36570, PA14_36580, PA14_36590, PA14_36605, PA14_36620, PA14_36630, PA14_36650, PA14_36660, PA14_36670, PA14_36680, PA14_36690, PA14_36700	12	glycogen synthase, putative glycosyl hydrolase, putative 4-alpha-glucanotransferase, putative glycosyl hydrolase, hypothetical protein, putative glycosyl hydrolase, hypothetical protein, putative alcohol dehydrogenase, hypothetical protein, hypothetical protein, cardiolipin synthase 2, hypothetical protein	PA2165, PA2164, PA2163, PA2162, PA2161, PA2160, PA2159, PA2158, PA2157, PA2156, PA2155, PA2154	No
PA14_36690	PA14_RS14935	operon_1544	1	1	non essential gene	C5	set2		cardiolipin synthase 2	1034.68	-0.299129	963.321	-0.696581	1157.11	-0.485512	COG1502	[I] Lipid transport and metabolism					PA14_36570, PA14_36580, PA14_36590, PA14_36605, PA14_36620, PA14_36630, PA14_36650, PA14_36660, PA14_36670, PA14_36680, PA14_36690, PA14_36700	12	glycogen synthase, putative glycosyl hydrolase, putative 4-alpha-glucanotransferase, putative glycosyl hydrolase, hypothetical protein, putative glycosyl hydrolase, hypothetical protein, putative alcohol dehydrogenase, hypothetical protein, hypothetical protein, cardiolipin synthase 2, hypothetical protein	PA2165, PA2164, PA2163, PA2162, PA2161, PA2160, PA2159, PA2158, PA2157, PA2156, PA2155, PA2154	No
PA14_36700	PA14_RS14940	operon_1544	1	1	non essential gene	C5	set2		hypothetical protein	752.513	-0.138115	748.907	-0.140278	911.776	-0.307073	COG0392	[S] Function unknown					PA14_36570, PA14_36580, PA14_36590, PA14_36605, PA14_36620, PA14_36630, PA14_36650, PA14_36660, PA14_36670, PA14_36680, PA14_36690, PA14_36700	12	glycogen synthase, putative glycosyl hydrolase, putative 4-alpha-glucanotransferase, putative glycosyl hydrolase, hypothetical protein, putative glycosyl hydrolase, hypothetical protein, putative alcohol dehydrogenase, hypothetical protein, hypothetical protein, cardiolipin synthase 2, hypothetical protein	PA2165, PA2164, PA2163, PA2162, PA2161, PA2160, PA2159, PA2158, PA2157, PA2156, PA2155, PA2154	No
PA14_07970	PA14_RS03190	operon_1545	1	1	non essential gene	C5	set2		hypothetical protein	3234.41	-0.0964329	3188.14	-0.111123	3888.07	-0.198166	COG1734	[T] Signal transduction mechanisms	essential gene	essential gene			PA14_NovelOrf_023, PA14_07970, PA14_07980, PA14_07990, PA14_08000, PA14_08010, PA14_08020, PA14_08030, PA14_08040, PA14_08050, PA14_08060	10	Novel protein, hypothetical protein, hypothetical protein, hypothetical protein, hypothetical protein, hypothetical protein, putative bacteriophage protein, putative phage baseplate, putative phage tail, putative tail fiber, putative tail fiber	NA, PA0612, PA0613, PA0614, PA0615, PA0616, PA0617, PA0618, PA0619, PA0620, PA0621	No
PA14_64410	PA14_RS26315	operon_1546	1	1	non essential gene	C5	set2		hypothetical protein	549.425	-0.0467426	546.086	-0.279366	1060.93	-0.240949	COG1734	[T] Signal transduction mechanisms					PA14_64410	1	hypothetical protein	PA4870	No
PA14_58580	PA14_RS23890	operon_1547	1	1	non essential gene	C5	set2		hydroxylase	215.692	0.00484674	210.973	0.0833286	496.584	0.174777	COG3128	[S] Function unknown					PA14_58580, PA14_58600	2	putative hydroxylase, hypothetical protein	PA4515, PA4516	No
PA14_67630	PA14_RS27585	operon_1548	0	1	non essential gene	C5	set2		hypothetical protein	938.385	-0.20928	925.03	-0.256205	1663.52	-0.229378	COG0668	[M] Cell wall/membrane/envelope biogenesis					PA14_67630	1	hypothetical protein	PA5121	No
PA14_51830	PA14_RS21095	operon_1549	1	1	non essential gene	C5	set2		DNA-binding stress protein	332.827	-0.149184	328.346	-0.0822881	427.254	0.0186425	COG0783	[P] Inorganic ion transport and metabolism					PA14_51830	1	DNA-binding stress protein	PA0962	No
PA14_09940	PA14_RS04015	operon_155	0	0	non essential gene	C5	set2		protease			0.111482	0.475327			COG0693	[S] Function unknown					PA14_09930, PA14_09940	2	putative exonuclease III, putative protease	PA4172, PA4171	No
PA14_46700	PA14_RS18975	operon_1550	1	0	non essential gene	C5	set2		hypothetical protein	70.3839	0.0934873	64.7699	0.257082	165.468	-0.116722	COG5006	[S] Function unknown					PA14_46700	1	hypothetical protein	PA1360	No
PA14_27180	PA14_RS10990	operon_1551	1	1	non essential gene	C5	set2		hypothetical protein	267.448	0.0132848	252.39	-0.27253	311.652	-0.128648	COG1376	[S] Function unknown					PA14_27180	1	hypothetical protein	PA2854	No
PA14_52420	PA14_RS21340	operon_1552	0	1	essential gene	C4	set2	rimO	ribosomal protein S12 methylthiotransferase	129.779	-0.768398	92.1824	-1.90652	190.21	-2.69808	COG0621	[J] Translation, ribosomal structure and biogenesis					PA14_52420	1	hypothetical protein	PA0916	No
PA14_40070	PA14_RS16240	operon_1554	0	1	non essential gene	C5	set2		glutathione S-transferase	209.339	0.0834955	221.18	0.16089	264.072	0.308404	COG0625	[O] Posttranslational modification, protein turnover, chaperones					PA14_40070	1	putative glutathione S-transferase	PA1890	No
PA14_56720	PA14_RS23115	operon_1555	1	1	non essential gene	C5	set2		oxidoreductase	661.239	0.096891	647.4	0.14712	848.348	0.137774	COG0451	[M] Cell wall/membrane/envelope biogenesis					PA14_56720	1	putative oxidoreductase	PA4361	No
PA14_26260	PA14_RS10650	operon_156	1	1	non essential gene	C5	set2		hydrolase	445.803	0.0705701	445.719	-0.0223015	653.271	0.0563225	COG1473	[S] Function unknown					PA14_26210, PA14_26220, PA14_26230, PA14_26240, PA14_26260	5	ATP-binding component of, histidine ABC transporter,, histidine transport system, periplasmic histidine-binding protein, putative hydrolase	PA2926, PA2925, PA2924, PA2923, PA2922	No
PA14_30240	PA14_RS12325	operon_1563	1	1	essential gene	C3	set2	infA	translation initiation factor IF-1	579.26	-1.51683	568.237	-1.65921	914.95	-1.41814	COG0361	[J] Translation, ribosomal structure and biogenesis	essential gene	essential gene			PA14_30240	1	translation initiation factor	PA2619	No
PA14_30270	PA14_RS12335	operon_1564	1	1	non essential gene	C5	set2	aat	leucyl/phenylalanyl-tRNA--protein transferase	331.837	0.223091	341.011	0.077788	541.035	0.153113	COG2360	[O] Posttranslational modification, protein turnover, chaperones	essential gene				PA14_30270, PA14_30280	2	leucyl/phenylalanyl-tRNA--protein transferase, thioredoxin reductase 1	PA2617, PA2616	No
PA14_30280	PA14_RS12340	operon_1565	1	1	non essential gene	C5	set2	trxB1	thioredoxin reductase 1	389.946	0.035187	398.314	0.102093	468.658	0.369357	COG0492	[O] Posttranslational modification, protein turnover, chaperones					PA14_30270, PA14_30280	2	leucyl/phenylalanyl-tRNA--protein transferase, thioredoxin reductase 1	PA2617, PA2616	No
PA14_53290	PA14_RS21695	operon_1566	1	1	essential gene	C4	set2	trxB2	thioredoxin reductase 2	117.592	-0.669026	109.196	-0.986369	144.442	-1.02404	COG0492	[C] Energy production and conversion					PA14_53290	1	thioredoxin reductase 2	PA0849	No
PA14_14270	PA14_RS05695	operon_1567	1	1	non essential gene	C5	set2		isochorismatase family hydrolase	677.463	-0.205862	632.701	-0.407084	1246.73	-0.612993	COG1335	[Q] Secondary metabolites biosynthesis, transport and catabolism					PA14_14270	1	isochorismatase family hydrolase	PA3846	No
PA14_29240	PA14_RS11920	operon_1568	0	1	non essential gene	C5	set2		hydrolase	145.912	0.0582621	139.155	-0.0445851	283.092	0.00396573	COG1335	[Q] Secondary metabolites biosynthesis, transport and catabolism					PA14_29240	1	putative hydrolase	PA2698	No
PA14_56480	PA14_RS23025	operon_157	0	1	non essential gene	C5	set2		hydrolase	792.1	0.106151	863.84	0.222745	1591.35	0.373694	COG1473	[S] Function unknown					PA14_56450, PA14_56470, PA14_56480	3	amidase, putative MFS transporter, putative hydrolase	PA4342, PA4343, PA4344	No
PA14_48760	PA14_RS19795	operon_1570	0	0	non essential gene	C5	set2		hydrolase	14.1258	-0.72147	16.1764	-0.137254	14.4841	-0.52585	COG1335	[Q] Secondary metabolites biosynthesis, transport and catabolism					PA14_48760	1	putative hydrolase	PA1202	No
PA14_12270	PA14_RS04965	operon_1572	1	1	non essential gene	C5	set2		hypothetical protein	240.042	0.229482	231.426	0.327359	302.689	0.566746	COG1434	[S] Function unknown					PA14_12270	1	hypothetical protein	PA3985	No
PA14_56900	PA14_RS23190	operon_1575	1	1	non essential gene	C5	set2	pncB2	nicotinate phosphoribosyltransferase	2940.04	-0.017003	2898.53	0.00795669	3592.65	0.0424405	COG1488	[H] Coenzyme transport and metabolism					PA14_56900	1	nicotinate phosphoribosyltransferase	PA4376	No
PA14_64960	PA14_RS26565	operon_1576	0	1	non essential gene	C5	set2	pncB1	nicotinate phosphoribosyltransferase	1310.65	-0.0120296	1285.23	-0.0666227	1502.88	-0.129463	COG1488	[F] Nucleotide transport and metabolism					PA14_64950, PA14_64960, PA14_64980, PA14_64990	4	hypothetical protein, nicotinate phosphoribosyltransferase, NAD synthetase, hypothetical protein	PA4918, PA4919, PA4920, PA4921	Yes
PA14_43680	PA14_RS17745	operon_1577	1	1	non essential gene	C5	set2	fabA	3-hydroxydecanoyl-ACP dehydratase	513.878	-0.347832	531.976	-0.0823729	1146.91	0.107545	COG0764	[I] Lipid transport and metabolism	essential gene		essential gene	Conditional	PA14_43680, PA14_43690	2	3-hydroxydecanoyl-(acyl carrier protein), 3-oxoacyl-(acyl carrier protein)	PA1610, PA1609	Yes
PA14_60550	PA14_RS24735	operon_1578	0	1	non essential gene	C5	set2		ATP-dependent protease	643.471	-0.00192874	673.3	-0.0120222	943.237	-0.0141909	COG1067	[O] Posttranslational modification, protein turnover, chaperones					PA14_60550	1	putative ATP-dependent protease	PA4576	No
PA14_25150	PA14_RS10200	operon_1579	0	1	non essential gene	C5	set2		hypothetical protein	110.474	-0.195668	115.345	-0.00441907	198.371	-0.222778	COG5404	[D] Cell cycle control, cell division, chromosome partitioning					PA14_25150, PA14_25160	2	hypothetical protein, LexA repressor	PA3008, PA3007	No
PA14_68560	PA14_RS27955	operon_158	0	1	non essential gene	C5	set2		nitroreductase	444.945	0.11785	435.797	0.089576	610.711	0.0870812	COG0778	[C] Energy production and conversion					PA14_68560	1	putative nitroreductase	PA5190	No
PA14_04640	PA14_RS01880	operon_1581	1	1	non essential gene	C5	set2		hypothetical protein	340.933	0.0448431	298.814	-0.0359327	549.212	-0.0242862	COG1092	[J] Translation, ribosomal structure and biogenesis					PA14_04640, PA14_04650	2	hypothetical protein, protease PfpI	PA0354, PA0355	No
PA14_46250	PA14_RS18765	operon_1582	0	0	non essential gene	C5	set2		hypothetical protein	65.6652	-0.209761	67.6142	-0.136578	139.51	-0.530174	COG1092	[J] Translation, ribosomal structure and biogenesis					PA14_46240, PA14_46250, PA14_46260	3	hypothetical protein, hypothetical protein, hypothetical protein	PA1408, PA1407, PA1406	No
PA14_30370	PA14_RS12380	operon_1583	1	1	non essential gene	C5	set2		hypothetical protein	436.563	0.271573	478.2	0.427135	637.314	0.552433	COG2920	[P] Inorganic ion transport and metabolism	essential gene	essential gene	essential gene	Core	PA14_30370, PA14_30380, PA14_30390, PA14_30400	4	hypothetical protein, hypothetical protein, sulfur relay protein, sulfur transfer complex	PA2608, PA2607, PA2606, PA2605	Yes
PA14_10540	PA14_RS04245	operon_1589	0	0	non essential gene	C5	set2		iron-sulfur cluster-binding protein	39.5978	-0.181223	48.2677	-0.209685	100.248	-0.127901	COG0348	[C] Energy production and conversion					PA14_10530, PA14_10540	2	GntR family transcriptional, putative iron-sulfur cluster-binding	PA4132, PA4131	No
PA14_03550	PA14_RS01465	operon_159	1	0	non essential gene	C5	set2		MFS transporter	92.1475	0.0608809	97.0184	0.15255	231.442	0.0625295	COG2807	[P] Inorganic ion transport and metabolism					PA14_03550	1	putative MFS transporter	PA0273	No
PA14_20230	PA14_RS08100	operon_1590	1	0	non essential gene	C5	set2	nosR	regulatory protein NosR	66.2234	0.0194173	62.7296	0.349861	142.688	0.0579978	COG0348	[C] Energy production and conversion					PA14_20150, PA14_20170, PA14_20180, PA14_20190, PA14_20200, PA14_20230	6	NosL protein, NosY protein, NosF protein, copper ABC transporter, nitrous-oxide reductase, regulatory protein NosR	PA3396, PA3395, PA3394, PA3393, PA3392, PA3391	No
PA14_20230	PA14_RS08100	operon_1590	1	0	non essential gene	C5	set2	nosR	regulatory protein NosR	66.2234	0.0194173	62.7296	0.349861	142.688	0.0579978	COG0348	[K] Transcription					PA14_20150, PA14_20170, PA14_20180, PA14_20190, PA14_20200, PA14_20230	6	NosL protein, NosY protein, NosF protein, copper ABC transporter, nitrous-oxide reductase, regulatory protein NosR	PA3396, PA3395, PA3394, PA3393, PA3392, PA3391	No
PA14_44420	PA14_RS18050	operon_1591	0	1	essential gene	C4	set2		ferredoxin	825.607	-0.524163	679.51	-1.05926	792.402	-1.30146	COG0348	[C] Energy production and conversion					PA14_44420, PA14_44430	2	putative ferredoxin, hypothetical protein	PA1551, PA1550	No
PA14_38590	PA14_RS15685	operon_16	1	1	non essential gene	C5	set2	bdhA	3-hydroxybutyrate dehydrogenase	256.462	-0.0956544	270.7	-0.0238951	315.736	-0.0771147	COG1028	[I] Lipid transport and metabolism					PA14_38580, PA14_38590	2	hypothetical protein, 3-hydroxybutyrate dehydrogenase	PA2004, PA2003	No
PA14_38590	PA14_RS15685	operon_16	1	1	non essential gene	C5	set2	bdhA	3-hydroxybutyrate dehydrogenase	256.462	-0.0956544	270.7	-0.0238951	315.736	-0.0771147	COG1028	[Q] Secondary metabolites biosynthesis, transport and catabolism					PA14_38580, PA14_38590	2	hypothetical protein, 3-hydroxybutyrate dehydrogenase	PA2004, PA2003	No
PA14_32330	PA14_RS13185	operon_160	1	1	non essential gene	C5	set2		cyanate permease	235.849	-0.355523	227.33	-0.0984547	384.645	-0.221758	COG2807	[P] Inorganic ion transport and metabolism					PA14_32330, PA14_32340, PA14_32350	3	putative cyanate permease, putative deaminase, hypothetical protein	PA2500, PA2499, PA2498	No
PA14_43490	PA14_RS17665	operon_161	1	1	non essential gene	C5	set2		cyanate MFS transporter	860.219	0.0975537	912.876	0.310881	1129.3	0.421781	COG2807	[P] Inorganic ion transport and metabolism					PA14_43480, PA14_43490	2	GntR family transcriptional, putative cyanate MFS	PA1627, PA1626	No
PA14_39850	PA14_RS16150	operon_1612	0	1	essential gene	C4	set2		MFS transporter	195.408	-0.10632	148.478	-0.682899	345.969	-1.59084	COG0477	[E] Amino acid transport and metabolism					PA14_39850, PA14_39860	2	putative MFS transporter, hypothetical protein	PA1908, PA1907	No
PA14_39850	PA14_RS16150	operon_1612	0	1	essential gene	C4	set2		MFS transporter	195.408	-0.10632	148.478	-0.682899	345.969	-1.59084	COG0477	[G] Carbohydrate transport and metabolism					PA14_39850, PA14_39860	2	putative MFS transporter, hypothetical protein	PA1908, PA1907	No
PA14_39850	PA14_RS16150	operon_1612	0	1	essential gene	C4	set2		MFS transporter	195.408	-0.10632	148.478	-0.682899	345.969	-1.59084	COG0477	[P] Inorganic ion transport and metabolism					PA14_39850, PA14_39860	2	putative MFS transporter, hypothetical protein	PA1908, PA1907	No
PA14_49750	PA14_RS20205	operon_1613	0	1	non essential gene	C5	set2		MFS family transporter	150.901	0.04695	162.501	0.265827	296.071	0.247183	COG0477	[E] Amino acid transport and metabolism					PA14_49750, PA14_49760	2	MFS family transporter, rhamnosyltransferase 2	PA1131, PA1130	No
PA14_49750	PA14_RS20205	operon_1613	0	1	non essential gene	C5	set2		MFS family transporter	150.901	0.04695	162.501	0.265827	296.071	0.247183	COG0477	[G] Carbohydrate transport and metabolism					PA14_49750, PA14_49760	2	MFS family transporter, rhamnosyltransferase 2	PA1131, PA1130	No
PA14_49750	PA14_RS20205	operon_1613	0	1	non essential gene	C5	set2		MFS family transporter	150.901	0.04695	162.501	0.265827	296.071	0.247183	COG0477	[P] Inorganic ion transport and metabolism					PA14_49750, PA14_49760	2	MFS family transporter, rhamnosyltransferase 2	PA1131, PA1130	No
PA14_05510	PA14_RS02240	operon_1616	1	1	non essential gene	C5	set2		hypothetical protein	159.622	0.38057	179.176	0.697863	521.645	0.983955	COG2353	[S] Function unknown					PA14_05500, PA14_05510	2	hypothetical protein, hypothetical protein	PA0422, PA0423	No
PA14_18710	PA14_RS07500	operon_1618	1	1	essential gene	C4	set2	pyrC	dihydroorotase	376.306	-0.486185	319.682	-1.13864	655.247	-1.07903	COG0418	[F] Nucleotide transport and metabolism			essential gene	Core	PA14_18700, PA14_18710	2	ribonuclease T, dihydroorotase	PA3528, PA3527	Yes
PA14_11970	PA14_RS04840	operon_162	1	1	non essential gene	C5	set2		3-methyladenine DNA glycosylase	1273.3	-1.1593e-05	1262.32	0.0532823	2859.16	0.16576	COG2094	[L] Replication, recombination and repair					PA14_11960, PA14_11970	2	hypothetical protein, 3-methyladenine DNA glycosylase	PA4011, PA4010	No
PA14_25560	PA14_RS10365	operon_1620	0	1	essential gene	C2	set1	rne	ribonuclease E	65.7695	-1.18145	35.461	-2.33898	15.8902	-5.28044	COG1530	[J] Translation, ribosomal structure and biogenesis				Core	PA14_25560	1	ribonuclease E	PA2976	Yes
PA14_25610	PA14_RS10385	operon_1621	1	1	essential gene	C4	set2		Maf-like protein	986.425	-0.379979	781.194	-1.00715	868.026	-1.20053	COG0424	[D] Cell cycle control, cell division, chromosome partitioning					PA14_25610	1	Maf-like protein	PA2972	No
PA14_58110	PA14_RS23705	operon_1622	0	1	non essential gene	C5	set2		Maf-like protein	112.133	0.0761074	105.377	0.0683309	264.796	0.251579	COG0424	[D] Cell cycle control, cell division, chromosome partitioning					PA14_58090, PA14_58100, PA14_58110	3	hypothetical protein, cytoplasmic axial filament, Maf-like protein	PA4476, PA4477, PA4478	No
PA14_25230	PA14_RS10230	operon_1626	1	1	non essential gene	C5	set2	mfd	transcription-repair coupling factor	903.243	0.211366	846.075	0.110183	1890.3	0.360884	COG1197	[L] Replication, recombination and repair					PA14_25220, PA14_25230	2	hypothetical protein, transcription-repair coupling factor	PA3003, PA3002	No
PA14_49170	PA14_RS19970	operon_1628	1	1	non essential gene	C5	set2	phoQ	two-component sensor PhoQ	479.353	0.0266438	455.838	-0.0721407	623.925	-0.172205	COG0642	[T] Signal transduction mechanisms					PA14_49170, PA14_49180	2	two-component sensor PhoQ, two-component response regulator	PA1180, PA1179	No
PA14_72550	PA14_RS29535	operon_163	1	1	non essential gene	C5	set2		adhesin	335.696	-0.214041	334.715	-0.162661	562.632	-0.483728	COG4531	[P] Inorganic ion transport and metabolism					PA14_72550	1	putative adhesin	PA5498	No
PA14_22010	PA14_RS08895	operon_1630	1	0	non essential gene	C5	set2	minE	cell division topological specificity factor MinE	10.7147	-0.454125	6.13492	-1.16579	27.813	-0.986075	COG0851	[D] Cell cycle control, cell division, chromosome partitioning	essential gene	essential gene	essential gene	Conditional	PA14_22010	1	cell division topological	PA3245	Yes
PA14_22020	PA14_RS08900	operon_1630	1	1	non essential gene	C5	set2	minD	cell division inhibitor MinD	425.529	0.64985	499.649	1.0465	720.145	1.34824	COG2894	[D] Cell cycle control, cell division, chromosome partitioning		essential gene	essential gene	Conditional	PA14_22020	1	cell division inhibitor	PA3244	Yes
PA14_22040	PA14_RS08905	operon_1630	1	1	non essential gene	C5	set2	minC	septum formation inhibitor	334.507	0.201614	316.105	-0.0704865	465.573	0.134719	COG0850	[D] Cell cycle control, cell division, chromosome partitioning				Conditional	PA14_22040	1	septum formation inhibitor	PA3243	Yes
PA14_07000	PA14_RS02810	operon_1631	1	1	non essential gene	C5	set2	dsbB1	DsbB1	822.517	-0.285121	715.987	-0.320735	1966.1	-0.790754	COG1495	[O] Posttranslational modification, protein turnover, chaperones					PA14_07000	1	disulfide bond formation	PA0538	No
PA14_69400	PA14_RS28290	operon_1632	1	1	non essential gene	C5	set2	dsbB2	DsbB2	1576.88	-0.0436843	1459.04	-0.227166	1748.67	-0.145353	COG1495	[O] Posttranslational modification, protein turnover, chaperones					PA14_69400	1	disulfide bond formation	PA5256	No
PA14_41000	PA14_RS16615	operon_1633	1	1	non essential gene	C5	set2	nhaB	sodium/proton antiporter	541.445	-0.00787003	528.583	-0.025145	854.547	-0.0425473	COG3067	[P] Inorganic ion transport and metabolism					PA14_41000	1	sodium/proton antiporter	PA1820	No
PA14_07650	PA14_RS03060	operon_1634	1	1	non essential gene	C5	set2		SpoVR family protein	1379.25	-0.0975243	1398.95	0.121284	1831.87	-0.00377435	COG2719	[S] Function unknown					PA14_07650	1	SpoVR family protein	PA0586	No
PA14_61820	PA14_RS25255	operon_1637	0	1	non essential gene	C5	set2		GTP-dependent nucleic acid-binding protein EngD	2637.13	-0.0772854	2352.09	-0.422352	2792.96	-0.664833	COG0012	[J] Translation, ribosomal structure and biogenesis					PA14_61820	1	GTP-dependent nucleic acid-binding	PA4673	No
PA14_61770	PA14_RS25240	operon_1638	1	1	essential gene	C1	set1	prs	ribose-phosphate pyrophosphokinase	624.023	-3.06041	308.744	-6.87022	168.1	-9.95958	COG0462	[F] Nucleotide transport and metabolism			essential gene	Conditional	PA14_61770	1	ribose-phosphate pyrophosphokinase	PA4670	Yes
PA14_61740	PA14_RS25225	operon_1639	0	1	non essential gene	C5	set2	lolB	outer membrane lipoprotein LolB	590.502	-0.350845	481.735	-0.66955	1223.46	-0.656082	COG3017	[M] Cell wall/membrane/envelope biogenesis	essential gene	essential gene	essential gene	Core	PA14_61720, PA14_61740, PA14_61750	3	hypothetical protein, outer membrane lipoprotein, 4-diphosphocytidyl-2-C-methyl-D-erythritol	PA4667, PA4668, PA4669	Yes
PA14_61750	PA14_RS25230	operon_1639	0	0	non essential gene	C5	set2	ipk	4-diphosphocytidyl-2-C-methyl-D-erythritol kinase	75.6215	0.121226	76.1503	0.113166	179.324	0.407008	COG1947	[F] Nucleotide transport and metabolism	essential gene	essential gene	essential gene	Core	PA14_61720, PA14_61740, PA14_61750	3	hypothetical protein, outer membrane lipoprotein, 4-diphosphocytidyl-2-C-methyl-D-erythritol	PA4667, PA4668, PA4669	Yes
PA14_23790	PA14_RS09640	operon_164	1	1	non essential gene	C5	set2	leuB	3-isopropylmalate dehydrogenase	273.742	-0.0597528	270.96	-0.035126	355.567	-0.243687	COG0473	[C] Energy production and conversion				Conditional	PA14_23790	1	3-isopropylmalate dehydrogenase	PA3118	Yes
PA14_23790	PA14_RS09640	operon_164	1	1	non essential gene	C5	set2	leuB	3-isopropylmalate dehydrogenase	273.742	-0.0597528	270.96	-0.035126	355.567	-0.243687	COG0473	[E] Amino acid transport and metabolism				Conditional	PA14_23790	1	3-isopropylmalate dehydrogenase	PA3118	Yes
PA14_30400	PA14_RS12395	operon_1640	0	1	essential gene	C3	set2		sulfur transfer complex subunit TusD	461.037	-1.2396	292.565	-2.20956	278.515	-2.55074	COG1553	[P] Inorganic ion transport and metabolism	essential gene			Core	PA14_30370, PA14_30380, PA14_30390, PA14_30400	4	hypothetical protein, hypothetical protein, sulfur relay protein, sulfur transfer complex	PA2608, PA2607, PA2606, PA2605	Yes
PA14_22780	PA14_RS09240	operon_1641	1	1	non essential gene	C5	set2	yciI	YciI-like protein	1671.55	-0.13826	1574.62	-0.103859	1848.75	-0.154712	COG2350	[S] Function unknown					PA14_22760, PA14_22770, PA14_22780, PA14_22800	4	putative two-component response, hypothetical protein, YciI-like protein, intracellular septation protein	PA3204, PA3203, PA3202, PA3201	No
PA14_05860	PA14_RS02365	operon_1642	1	0	non essential gene	C5	set2		hypothetical protein	27.3478	-0.203162	27.863	0.0490658	37.8888	-0.103498	COG1607	[I] Lipid transport and metabolism					PA14_05860	1	hypothetical protein	PA0449	No
PA14_16010	PA14_RS06415	operon_1643	1	1	non essential gene	C5	set2		hypothetical protein	993.405	-0.0216486	1162.9	1.00517	2968.73	0.977497	COG1607	[I] Lipid transport and metabolism					PA14_16010	1	hypothetical protein	PA3741	No
PA14_29290	PA14_RS11945	operon_1644	1	1	non essential gene	C5	set2		hypothetical protein	3884.99	-0.0596695	3849.3	-0.128599	5769.85	-0.147906	COG1607	[I] Lipid transport and metabolism					PA14_29290	1	hypothetical protein	PA2693	No
PA14_70930	PA14_RS28890	operon_1645	1	1	non essential gene	C5	set2		hypothetical protein	1764.65	-0.0913566	1910.23	0.101258	2668.89	0.160268	COG1607	[I] Lipid transport and metabolism					PA14_70930	1	hypothetical protein	PA5371	No
PA14_11510	PA14_RS04655	operon_1647	0	1	essential gene	C1	set1	ribA	GTP cyclohydrolase II	88.2603	-3.00567	48.7785	-7.57704	15.0146	-6.46833	COG0807	[H] Coenzyme transport and metabolism	essential gene		essential gene	Core	PA14_11510, PA14_11520, PA14_11530	3	GTP cyclohydrolase II, hypothetical protein, hypothetical protein	PA4047, PA4046, PA4045	Yes
PA14_30190	PA14_RS12305	operon_165	1	1	non essential gene	C5	set2	icd	isocitrate dehydrogenase	1479.92	0.402593	1636.58	0.720737	2211.27	1.05862	COG0538	[C] Energy production and conversion					PA14_30190	1	isocitrate dehydrogenase	PA2623	No
PA14_65200	PA14_RS26655	operon_1651	1	1	non essential gene	C5	set2	rnr	exoribonuclease RNase R	1324.68	-0.278779	1265.89	-0.472218	2712.64	-0.691616	COG0557	[J] Translation, ribosomal structure and biogenesis					PA14_65190, PA14_65200	2	TrmH family RNA, exoribonuclease RNase R	PA4936, PA4937	No
PA14_41170	PA14_RS16685	operon_1652	1	1	non essential gene	C5	set2	fabI	NADH-dependent enoyl-ACP reductase	9056.86	-0.0630581	8797.88	-0.0446269	9982.91	-0.143321	COG0623	[I] Lipid transport and metabolism					PA14_41110, PA14_41130, PA14_41140, PA14_41150, PA14_41160, PA14_41170	6	putative solute-binding protein, putative binding protein, ABC transporter permease, putative permease of, putative ATP-binding component, NADH-dependent enoyl-ACP reductase	PA1811, PA1810, PA1809, PA1808, PA1807, PA1806	No
PA14_38130	PA14_RS15495	operon_1653	0	1	non essential gene	C5	set2		amino acid permease	519.629	-0.121104	463.253	-0.17815	994.576	-0.152239	COG0531	[E] Amino acid transport and metabolism					PA14_38130	1	putative amino acid	PA2041	No
PA14_38140	PA14_RS15500	operon_1653	1	1	non essential gene	C5	set2		glutamine synthetase	745.432	0.0187262	750.319	-0.0669614	1086.2	-0.124397	COG0174	[E] Amino acid transport and metabolism					PA14_38140	1	putative glutamine synthetase	PA2040	No
PA14_31810	PA14_RS13020	operon_1669	1	1	non essential gene	C5	set2	tpx	thiol peroxidase	5264.23	-0.0425859	5355.7	-0.118376	6969.36	-0.156027	COG2077	[O] Posttranslational modification, protein turnover, chaperones					PA14_31810	1	thiol peroxidase	PA2532	No
PA14_37460	PA14_RS15245	operon_167	1	1	non essential gene	C5	set2		permease	740.494	-0.157124	793.928	0.29466	1887.13	0.334502	COG0477	[P] Inorganic ion transport and metabolism					PA14_37440, PA14_37460, PA14_37470, PA14_37490, PA14_37510, PA14_37520, PA14_37530, PA14_37550, PA14_37560, PA14_37570	10	putative MFS transporter, putative permease, putative flavin-dependent oxidoreductase, putative TonB-dependent receptor, hypothetical protein, hypothetical protein, putative hydrolase, putative ring-hydroxylating dioxygenase, asparagine synthetase, glutamine-hydrolysing, ring-hydroxylating dioxygenase, large	PA2092, PA2091, PA2090, PA2089, PA2088, PA2087, PA2086, PA2085, PA2084, PA2083	No
PA14_37460	PA14_RS15245	operon_167	1	1	non essential gene	C5	set2		permease	740.494	-0.157124	793.928	0.29466	1887.13	0.334502	COG0477	[E] Amino acid transport and metabolism					PA14_37440, PA14_37460, PA14_37470, PA14_37490, PA14_37510, PA14_37520, PA14_37530, PA14_37550, PA14_37560, PA14_37570	10	putative MFS transporter, putative permease, putative flavin-dependent oxidoreductase, putative TonB-dependent receptor, hypothetical protein, hypothetical protein, putative hydrolase, putative ring-hydroxylating dioxygenase, asparagine synthetase, glutamine-hydrolysing, ring-hydroxylating dioxygenase, large	PA2092, PA2091, PA2090, PA2089, PA2088, PA2087, PA2086, PA2085, PA2084, PA2083	No
PA14_37460	PA14_RS15245	operon_167	1	1	non essential gene	C5	set2		permease	740.494	-0.157124	793.928	0.29466	1887.13	0.334502	COG0477	[G] Carbohydrate transport and metabolism					PA14_37440, PA14_37460, PA14_37470, PA14_37490, PA14_37510, PA14_37520, PA14_37530, PA14_37550, PA14_37560, PA14_37570	10	putative MFS transporter, putative permease, putative flavin-dependent oxidoreductase, putative TonB-dependent receptor, hypothetical protein, hypothetical protein, putative hydrolase, putative ring-hydroxylating dioxygenase, asparagine synthetase, glutamine-hydrolysing, ring-hydroxylating dioxygenase, large	PA2092, PA2091, PA2090, PA2089, PA2088, PA2087, PA2086, PA2085, PA2084, PA2083	No
PA14_41440	PA14_RS16805	operon_1670	1	1	non essential gene	C5	set2		hypothetical protein	306.514	-0.0131898	280.424	0.112838	524.295	0.164451	COG0589	[T] Signal transduction mechanisms					PA14_41440	1	hypothetical protein	PA1789	No
PA14_56220	PA14_RS22945	operon_1671	1	1	non essential gene	C5	set2		hypothetical protein	293.958	0.079037	305.224	-0.0326168	437.1	-0.11015	COG0589	[T] Signal transduction mechanisms					PA14_56220	1	hypothetical protein	PA4328	No
PA14_44490	PA14_RS18085	operon_1672	1	1	non essential gene	C5	set2	anr	transcriptional regulator Anr	115.678	0.0228581	111.462	-0.313938	245.415	-0.101074	COG0664	[K] Transcription					PA14_44490	1	transcriptional regulator Anr	PA1544	No
PA14_17760	PA14_RS07145	operon_1673	1	1	non essential gene	C5	set2		methylated-DNA--protein-cysteine methyltransferase	1845.55	-0.154782	1862.92	-0.12108	2513.59	-0.126998	COG0350	[F] Nucleotide transport and metabolism					PA14_17760	1	putative methylated-DNA--protein-cysteine	PA3596	No
PA14_17760	PA14_RS07145	operon_1673	1	1	non essential gene	C5	set2		methylated-DNA--protein-cysteine methyltransferase	1845.55	-0.154782	1862.92	-0.12108	2513.59	-0.126998	COG0350	[L] Replication, recombination and repair					PA14_17760	1	putative methylated-DNA--protein-cysteine	PA3596	No
PA14_48870	PA14_RS19845	operon_1674	1	1	non essential gene	C5	set2		C32 tRNA thiolase	1604.78	-0.0196825	1507.35	-0.0230722	1830.26	-0.0630025	COG0037	[J] Translation, ribosomal structure and biogenesis					PA14_48860, PA14_48870	2	hypothetical protein, ATPase	PA1193, PA1192	No
PA14_52290	PA14_RS21290	operon_1677	0	1	non essential gene	C5	set2		hypothetical protein	3769.88	-0.0241734	3632.46	-0.127784	9549.42	-0.151836	COG3187	[O] Posttranslational modification, protein turnover, chaperones					PA14_52280, PA14_52290	2	hypothetical protein, hypothetical protein	PA0926, PA0925	No
PA14_52270	PA14_RS21280	operon_1678	1	1	non essential gene	C5	set2	ldhA	D-lactate dehydrogenase	217.411	0.128552	215.03	0.084331	361.43	0.16758	COG1052	[C] Energy production and conversion					PA14_52260, PA14_52270	2	sensor/response regulator hybrid, D-lactate dehydrogenase (fermentative)	PA0928, PA0927	No
PA14_52270	PA14_RS21280	operon_1678	1	1	non essential gene	C5	set2	ldhA	D-lactate dehydrogenase	217.411	0.128552	215.03	0.084331	361.43	0.16758	COG1052	[H] Coenzyme transport and metabolism					PA14_52260, PA14_52270	2	sensor/response regulator hybrid, D-lactate dehydrogenase (fermentative)	PA0928, PA0927	No
PA14_10940	PA14_RS04405	operon_1679	1	1	non essential gene	C5	set2		AraC family transcriptional regulator	176.589	0.23704	174.816	0.386123	419.738	0.613044	COG2207	[K] Transcription					PA14_10940	1	AraC family transcriptional	PA4094	No
PA14_47560	PA14_RS19345	operon_168	1	1	non essential gene	C5	set2		MFS transporter	939.098	-0.0829011	922.666	0.00548668	1975.87	-0.0897362	COG0477	[E] Amino acid transport and metabolism					PA14_47560	1	putative MFS transporter	PA1286	No
PA14_47560	PA14_RS19345	operon_168	1	1	non essential gene	C5	set2		MFS transporter	939.098	-0.0829011	922.666	0.00548668	1975.87	-0.0897362	COG0477	[G] Carbohydrate transport and metabolism					PA14_47560	1	putative MFS transporter	PA1286	No
PA14_47560	PA14_RS19345	operon_168	1	1	non essential gene	C5	set2		MFS transporter	939.098	-0.0829011	922.666	0.00548668	1975.87	-0.0897362	COG0477	[P] Inorganic ion transport and metabolism					PA14_47560	1	putative MFS transporter	PA1286	No
PA14_11240	PA14_RS04540	operon_1680	0	1	non essential gene	C5	set2		DNA-binding transcriptional activator FeaR	473.747	0.088227	492.831	-0.0521775	676.174	-0.179808	COG2207	[K] Transcription					PA14_11240	1	DNA-binding transcriptional activator	PA4070	No
PA14_22490	PA14_RS09105	operon_1681	1	0	non essential gene	C5	set2	acpD	ACP phosphodieterase	17.2763	-0.264434	19.7675	-0.265598	24.8906	-0.0720566	COG1182	[C] Energy production and conversion					PA14_22490	1	acyl carrier protein	PA3223	No
PA14_39150	PA14_RS15895	operon_1682	0	1	essential gene	C4	set1		azoreductase	85.4005	-0.174181	55.2872	-0.634931	24.6111	-1.56868	COG1182	[I] Lipid transport and metabolism					PA14_39150	1	azoreductase	PA1962	No
PA14_54120	PA14_RS22035	operon_1683	1	1	non essential gene	C5	set2		ACP phosphodieterase	504.372	0.119047	480.165	0.29611	1079.26	0.381289	COG1182	[I] Lipid transport and metabolism					PA14_54090, PA14_54110, PA14_54120	3	hypothetical protein, transporter, acyl carrier protein	PA0787, PA0786, PA0785	No
PA14_43160	PA14_RS17535	operon_1686	0	1	non essential gene	C5	set2		transporter	293.014	-0.101835	269.802	-0.11506	575.429	-0.309534	COG3135	[Q] Secondary metabolites biosynthesis, transport and catabolism					PA14_43160	1	putative transporter	PA1651	No
PA14_34990	PA14_RS14240	operon_1687	1	1	non essential gene	C5	set2		TonB-dependent receptor	333.389	0.429121	397.279	1.04795	571.284	1.42501	COG4772	[P] Inorganic ion transport and metabolism					PA14_34990	1	putative TonB-dependent receptor	PA2289	No
PA14_43240	PA14_RS17570	operon_1688	1	1	non essential gene	C5	set2		hypothetical protein	2189.12	-0.0798675	1980.28	-0.343287	3590.24	-0.541511	COG1853	[S] Function unknown					PA14_43240	1	hypothetical protein	PA1644	No
PA14_17190	PA14_RS06900	operon_169	1	0	non essential gene	C5	set2	fabZ	(3R)-hydroxymyristoyl-ACP dehydratase	20.8267	-0.158021	18.2549	-0.251352	38.7778	0.149055	COG0764	[I] Lipid transport and metabolism	essential gene	essential gene	essential gene	Core	PA14_17170, PA14_17180, PA14_17190, PA14_17210, PA14_17220, PA14_17230	6	hypothetical protein, UDP-3-O-[3-hydroxymyristoyl] glucosamine, (3R)-hydroxymyristoyl-ACP dehydratase, UDP-N-acetylglucosamine acyltransferase, lipid-A-disaccharide synthase, ribonuclease HII	PA3647, PA3646, PA3645, PA3644, PA3643, PA3642	Yes
PA14_08820	PA14_RS03565	operon_1698	1	1	non essential gene	C5	set2	fusA1	elongation factor G	1539.2	0.134894	1560.68	0.360033	2011.09	0.592213	COG0480	[J] Translation, ribosomal structure and biogenesis		essential gene	essential gene	Core	PA14_08790, PA14_08810, PA14_08820	3	30S ribosomal protein, 30S ribosomal protein, elongation factor G	PA4268, PA4267, PA4266	Yes
PA14_13410	PA14_RS05395	operon_1699	1	1	non essential gene	C5	set2	prfC	peptide chain release factor 3	500.687	0.101396	528.845	0.302822	1179.86	0.512657	COG4108	[J] Translation, ribosomal structure and biogenesis					PA14_13410	1	peptide chain release	PA3903	No
PA14_40900	PA14_RS16580	operon_17	1	1	non essential gene	C5	set2		short-chain dehydrogenase	630.217	0.0299382	711.043	0.498879	1850.84	0.763542	COG1028	[I] Lipid transport and metabolism					PA14_40900	1	putative short-chain dehydrogenase	PA1827	No
PA14_40900	PA14_RS16580	operon_17	1	1	non essential gene	C5	set2		short-chain dehydrogenase	630.217	0.0299382	711.043	0.498879	1850.84	0.763542	COG1028	[Q] Secondary metabolites biosynthesis, transport and catabolism					PA14_40900	1	putative short-chain dehydrogenase	PA1827	No
PA14_06420	PA14_RS02585	operon_170	1	1	non essential gene	C5	set2		hypothetical protein	1457	0.192663	1555.17	0.283379	1951.66	0.42379	COG1540	[S] Function unknown					PA14_06420	1	hypothetical protein	PA0492	No
PA14_37710	PA14_RS15340	operon_1700	1	1	non essential gene	C5	set2	fusA2	elongation factor G	681.707	0.0736061	633.222	-0.0979027	772.43	-0.0218927	COG0480	[J] Translation, ribosomal structure and biogenesis					PA14_37710	1	elongation factor G	PA2071	No
PA14_37270	PA14_RS15175	operon_171	1	0	non essential gene	C5	set2		LamB/YcsF family protein	150.782	0.123545	148.486	0.365996	177.564	0.327978	COG1540	[S] Function unknown					PA14_37250, PA14_37260, PA14_37270, PA14_37290, PA14_37310	5	major facilitator transporter, putative porin, LamB/YcsF family protein, hypothetical protein, hypothetical protein	PA2114, PA2113, PA2112, PA2111, PA2110	No
PA14_04180	PA14_RS01705	operon_1716	0	1	essential gene	C4	set2		hypothetical protein	194.518	-0.14135	184.524	-0.73005	373.118	-1.25025	COG3111	[S] Function unknown					PA14_04180	1	hypothetical protein	PA0320	No
PA14_00790	PA14_RS00340	operon_1717	1	1	non essential gene	C5	set2	prlC	oligopeptidase A	317.677	0.0495101	310.069	0.400183	443.026	0.285787	COG0339	[E] Amino acid transport and metabolism					PA14_00790, PA14_00800	2	oligopeptidase A, hypothetical protein	PA0067, PA0068	No
PA14_58540	PA14_RS23870	operon_172	1	1	non essential gene	C5	set2		hypothetical protein	246.99	0.0383729	248.187	0.0195531	461.624	0.112273	COG1540	[S] Function unknown					PA14_58515, PA14_58530, PA14_58540	3	hypothetical protein, hypothetical protein, hypothetical protein	PA4509, PA4510, PA4511	No
PA14_21660	PA14_RS08725	operon_1728	1	0	non essential gene	C5	set2		hypothetical protein	35.6627	0.152716	37.0722	0.438833	82.0092	0.682527	COG1742	[S] Function unknown					PA14_21650, PA14_21660	2	hypothetical protein, hypothetical protein	PA3276, PA3275	No
PA14_17940	PA14_RS07210	operon_173	1	1	essential gene	C2	set1	glpR	glycerol-3-phosphate regulon repressor	3502.37	-0.893732	1773.35	-2.371	831.325	-4.19322	COG1349	[K] Transcription					PA14_17940	1	glycerol-3-phosphate regulon repressor	PA3583	No
PA14_17920	PA14_RS07200	operon_1730	0	1	non essential gene	C5	set2	glpM	membrane protein GlpM	343.422	0.163229	325.709	0.0980443	415.956	-0.121355	COG3136	[S] Function unknown					PA14_17920	1	membrane protein GlpM	PA3585	No
PA14_53220	PA14_RS21670	operon_1731	1	0	non essential gene	C5	set2	fumC2	fumarate hydratase	9.92714	0.699251	13.2063	-0.14217	15.2092	-0.330748	COG0114	[C] Energy production and conversion					PA14_53220, PA14_53230	2	fumarate hydratase, oxidoreductase	PA0854, PA0853	No
PA14_58030	PA14_RS23665	operon_1732	1	0	non essential gene	C5	set2	fumC	fumarate hydratase	19.8378	-0.293447	21.2537	-0.0430438	39.6198	0.177957	COG0114	[C] Energy production and conversion					PA14_57990, PA14_58000, PA14_58010, PA14_58030, PA14_58040	5	hypothetical protein, superoxide dismutase, hypothetical protein, NA, hypothetical protein	PA4467, PA4468, PA4469, NA, PA4471	No
PA14_71650	PA14_RS29180	operon_1733	1	0	non essential gene	C5	set2	aspA	aspartate ammonia-lyase	38.7904	-0.125024	39.6655	0.48939	118.833	0.36997	COG1027	[E] Amino acid transport and metabolism					PA14_71650	1	aspartate ammonia-lyase	PA5429	No
PA14_10130	PA14_RS04090	operon_1734	1	1	non essential gene	C5	set2		short chain dehydrogenase	244.402	0.148526	251.575	0.370639	625.973	0.506926	COG1028	[I] Lipid transport and metabolism					PA14_10130	1	short chain dehydrogenase	PA4162	No
PA14_10130	PA14_RS04090	operon_1734	1	1	non essential gene	C5	set2		short chain dehydrogenase	244.402	0.148526	251.575	0.370639	625.973	0.506926	COG1028	[Q] Secondary metabolites biosynthesis, transport and catabolism					PA14_10130	1	short chain dehydrogenase	PA4162	No
PA14_10840	PA14_RS04370	operon_1735	1	1	non essential gene	C5	set2		dehydrogenase	373.695	0.148838	378.512	0.202731	762.478	0.323447	COG1028	[I] Lipid transport and metabolism					PA14_10840	1	NA	NA	No
PA14_10840	PA14_RS04370	operon_1735	1	1	non essential gene	C5	set2		dehydrogenase	373.695	0.148838	378.512	0.202731	762.478	0.323447	COG1028	[Q] Secondary metabolites biosynthesis, transport and catabolism					PA14_10840	1	NA	NA	No
PA14_20270	PA14_RS08120	operon_1736	1	1	non essential gene	C5	set2	rhlG	beta-ketoacyl reductase	1130.04	0.136709	1150.86	0.384083	1509.79	0.562003	COG1028	[Q] Secondary metabolites biosynthesis, transport and catabolism					PA14_20260, PA14_20270	2	hypothetical protein, beta-ketoacyl reductase	PA3388, PA3387	No
PA14_20270	PA14_RS08120	operon_1736	1	1	non essential gene	C5	set2	rhlG	beta-ketoacyl reductase	1130.04	0.136709	1150.86	0.384083	1509.79	0.562003	COG1028	[I] Lipid transport and metabolism					PA14_20260, PA14_20270	2	hypothetical protein, beta-ketoacyl reductase	PA3388, PA3387	No
PA14_72780	PA14_RS29625	operon_1737	0	0	non essential gene	C5	set2	pdxY	pyridoxamine kinase	17.1381	0.0333391	14.1757	-0.734757	33.5908	-0.318758	COG2240	[H] Coenzyme transport and metabolism					PA14_72780	1	pyridoxamine kinase	PA5516	No
PA14_53040	PA14_RS21600	operon_1738	1	1	non essential gene	C5	set2		lysozyme inhibitor	286.419	-0.13856	284.828	-0.0937687	339.325	-0.138306	COG3895	[S] Function unknown					PA14_53040	1	lysozyme inhibitor	PA0867	No
PA14_08520	PA14_RS03435	operon_1739	1	0	non essential gene	C5	set2	anmK	anhydro-N-acetylmuramic acid kinase	94.0043	0.359982	81.1436	0.268432	110.995	0.536611	COG2377	[O] Posttranslational modification, protein turnover, chaperones					PA14_08520, PA14_08540	2	anhydro-N-acetylmuramic acid kinase, hypothetical protein	PA0666, PA0667	No
PA14_45150	PA14_RS18355	operon_174	1	1	non essential gene	C5	set2		transcriptional regulator	517.456	0.00421148	455.411	-0.159985	545.237	-0.292729	COG1349	[K] Transcription					PA14_45150	1	putative transcriptional regulator	PA1490	No
PA14_20850	PA14_RS08380	operon_1740	1	1	non essential gene	C5	set2		MarR family transcriptional regulator	819.743	-0.0280094	860.997	0.0967025	1005.87	0.268142	COG1846	[K] Transcription					PA14_20850	1	MarR family transcriptional	PA3341	No
PA14_43770	PA14_RS17780	operon_1741	1	1	non essential gene	C5	set2		transcriptional regulator	1257.96	-0.0685096	1296.55	-0.0742332	1604.17	0.0287813	COG1846	[K] Transcription					PA14_43770	1	putative transcriptional regulator	PA1603	No
PA14_47580	PA14_RS19350	operon_1742	1	1	non essential gene	C5	set2		MarR family transcriptional regulator	665.515	-0.049722	632.532	-0.0924408	771.069	-0.210604	COG1846	[K] Transcription					PA14_47580	1	MarR family transcriptional	PA1285	No
PA14_68110	PA14_RS27780	operon_1743	1	1	non essential gene	C5	set2		transcriptional regulator	354.863	-0.0257127	341.371	-0.00722547	481.91	-0.186059	COG1846	[K] Transcription					PA14_68110, PA14_68120, PA14_68130, PA14_68140	4	putative transcriptional regulator, putative outer membrane, multidrug resistance protein, drug efflux transporter	PA5157, PA5158, PA5159, PA5160	No
PA14_15880	PA14_RS06360	operon_1744	0	1	essential gene	C4	set1		hypothetical protein	126.807	-0.743428	82.754	-1.14075	48.2889	-1.63469	COG3313	[S] Function unknown		essential gene			PA14_15870, PA14_15880	2	hypothetical protein, hypothetical protein	PA3753, PA3752	No
PA14_41450	PA14_RS16810	operon_1746	0	1	non essential gene	C5	set2		hypothetical protein	242.661	0.0346952	229.113	0.0383256	512.086	0.203259	COG3313	[S] Function unknown					PA14_41450	1	hypothetical protein	PA1788	No
PA14_18650	PA14_RS07470	operon_1747	1	1	essential gene	C4	set2		hypothetical protein	1628.67	-0.306537	1456.82	-0.695785	2092.28	-1.16403	COG0278	[O] Posttranslational modification, protein turnover, chaperones					PA14_18650	1	hypothetical protein	PA3533	No
PA14_73190	PA14_RS29795	operon_175	1	0	essential gene	C3	set1	glmR	GlmR transcriptional regulator	589.352	-1.08572	315.44	-2.63481	122.543	-3.28829	COG1349	[K] Transcription					PA14_73190	1	GlmR transcriptional regulator	PA5550	No
PA14_11410	PA14_RS04615	operon_1753	1	1	non essential gene	C5	set2	ribC	riboflavin synthase subunit alpha	429.35	0.0204514	448.8	0.0166236	1063.81	0.106544	COG0307	[H] Coenzyme transport and metabolism	essential gene	essential gene	essential gene	Core	PA14_11410, PA14_11420	2	riboflavin synthase subunit, bifunctional 3,4-dihydroxy-2-butanone	PA4055, PA4054	Yes
PA14_41670	PA14_RS16900	operon_1754	1	1	non essential gene	C5	set2	ppsA	phosphoenolpyruvate synthase	331.236	-0.116362	354.512	-0.133205	717.023	-0.0585747	COG0574	[G] Carbohydrate transport and metabolism					PA14_41670	1	phosphoenolpyruvate synthase	PA1770	No
PA14_66410	PA14_RS27100	operon_1755	0	1	non essential gene	C5	set2		hypothetical protein	207.451	0.273041	240.481	0.803577	618.947	0.972837	COG0397	[S] Function unknown					PA14_66410	1	hypothetical protein	PA5023	No
PA14_18360	PA14_RS07370	operon_176	1	1	non essential gene	C5	set2		glycosyl transferase family protein	660.171	0.276353	695.515	0.537228	1088.57	0.713218	COG0463	[M] Cell wall/membrane/envelope biogenesis					PA14_18300, PA14_18310, PA14_18320, PA14_18330, PA14_18340, PA14_18350, PA14_18360, PA14_18370	8	putative nucleotide sugar, hypothetical protein, hypothetical protein, 4-amino-4-deoxy-L-arabinose transferase, hypothetical protein, bifunctional UDP-glucuronic acid, putative glycosyl transferase, UDP-4-amino-4-deoxy-L-arabinose--oxoglutarate	PA3559, PA3558, PA3557, PA3556, PA3555, PA3554, PA3553, PA3552	No
PA14_28680	PA14_RS11680	operon_1761	1	0	non essential gene	C5	set2	rplT	50S ribosomal protein L20	72.2758	0.704801	67.879	0.802424	164.495	1.11761	COG0292	[J] Translation, ribosomal structure and biogenesis	essential gene	essential gene	essential gene	Core	PA14_28670, PA14_28680	2	50S ribosomal protein, 50S ribosomal protein	PA2742, PA2741	Yes
PA14_28670	PA14_RS11675	operon_1762	1	0	non essential gene	C5	set2	rpmI	50S ribosomal protein L35	15.7439	-0.093604	20.4544	0.532965	20.6631	0.496751	COG0291	[J] Translation, ribosomal structure and biogenesis	essential gene	essential gene			PA14_28670, PA14_28680	2	50S ribosomal protein, 50S ribosomal protein	PA2742, PA2741	Yes
PA14_57060	PA14_RS23265	operon_1764	1	0	non essential gene	C5	set2		hypothetical protein	161.395	0.334451	162.98	-0.376705	162.547	-0.132294	COG3137	[M] Cell wall/membrane/envelope biogenesis					PA14_57060	1	hypothetical protein	PA4390	No
PA14_57070	PA14_RS23270	operon_1765	1	1	non essential gene	C5	set2		hypothetical protein	305.652	0.170302	336.976	0.383232	684.761	0.721875	COG3137	[M] Cell wall/membrane/envelope biogenesis					PA14_57070	1	hypothetical protein	PA4391	No
PA14_64480	PA14_RS26350	operon_1766	0	1	essential gene	C4	set2	osmE	DNA-binding transcriptional activator OsmE	2661.97	-0.52107	2149.6	-1.53742	2148.19	-2.30019	COG2913	[J] Translation, ribosomal structure and biogenesis					PA14_64480	1	DNA-binding transcriptional activator	PA4876	No
PA14_67410	PA14_RS27500	operon_1767	1	1	non essential gene	C5	set2		hypothetical protein	198.981	-0.179235	191.176	-0.318223	315.124	-0.21508	COG3758	[S] Function unknown					PA14_67410, PA14_67420	2	hypothetical protein, histidine utilization genes	PA5104, PA5105	No
PA14_31700	PA14_RS12975	operon_1768	1	0	non essential gene	C5	set2		CDP-alcohol phosphatidyltransferase	50.6968	0.25108	40.8416	0.196466	113.366	0.130383	COG0558	[I] Lipid transport and metabolism		essential gene			PA14_31680, PA14_31690, PA14_31700, PA14_31720, PA14_31730, PA14_31740, PA14_31750, PA14_31760	8	hypothetical protein, hypothetical protein, putative CDP-alcohol phosphatidyltransferase, hypothetical protein, hypothetical protein, hypothetical protein, putative acyltransferase, putative phosphatidate cytidylyltransferase	PA2543, PA2542, PA2541, PA2540, PA2539, PA2538, PA2537, PA2536	No
PA14_53850	PA14_RS21930	operon_1779	1	1	non essential gene	C5	set2		oxidoreductase	151.195	0.563437	158	0.563167	372.59	0.787398	COG0656	[S] Function unknown					PA14_53850, PA14_53860	2	oxidoreductase, hypothetical protein	PA0804, PA0803	No
PA14_05420	PA14_RS02205	operon_178	1	1	non essential gene	C5	set2		transcriptional regulator	1007.33	-0.130741	1049.03	-0.032129	1616.58	-0.0877819	COG2207	[K] Transcription					PA14_05360, PA14_05380, PA14_05390, PA14_05400, PA14_05410, PA14_05420, PA14_05430	7	twitching motility protein, methyltransferase PilK, ChpA, methylesterase, putative chemotaxis protein, putative transcriptional regulator, putative chemotaxis protein	PA0411, PA0412, PA0413, PA0414, PA0415, PA0416, PA0417	No
PA14_02030	PA14_RS00830	operon_1780	1	1	non essential gene	C5	set2		AraC family transcriptional regulator	485.318	-0.0602109	434.187	-0.160698	903.656	-0.249705	COG1917	[K] Transcription					PA14_02030	1	AraC family transcriptional	PA0163	No
PA14_13060	PA14_RS05260	operon_1781	1	0	non essential gene	C5	set2		transcriptional regulator	133.067	-0.229234	130.362	0.0116786	145.159	-0.344324	COG1917	[K] Transcription					PA14_13060	1	putative transcriptional regulator	PA3927	No
PA14_14480	PA14_RS05790	operon_1782	1	1	non essential gene	C5	set2		transcriptional regulator	449.54	-0.0463142	430.966	-0.0148195	884.634	-0.00985167	COG1917	[K] Transcription					PA14_14480	1	putative transcriptional regulator	PA3830	No
PA14_32460	PA14_RS13245	operon_1783	0	1	non essential gene	C5	set2		transcriptional regulator	135.85	-0.13262	129.241	-0.0897082	321.407	-0.143445	COG2207	[K] Transcription					PA14_32450, PA14_32460	2	AraC family transcriptional, putative transcriptional regulator	PA2489, PA2488	No
PA14_43820	PA14_RS17800	operon_1784	1	1	non essential gene	C5	set2		transcriptional regulator	403.59	-0.0284137	456.121	0.682996	747.548	0.590043	COG1917	[K] Transcription					PA14_43820	1	putative transcriptional regulator	PA1599	No
PA14_48310	PA14_RS19605	operon_1785	1	0	non essential gene	C5	set2		transcriptional regulator	26.3748	0.154996	31.234	0.406264	59.307	0.692565	COG1917	[K] Transcription					PA14_48310	1	putative transcriptional regulator	PA1235	No
PA14_48390	PA14_RS19635	operon_1786	1	1	non essential gene	C5	set2		AraC family transcriptional regulator	194.091	-0.169617	189.377	-0.120103	426.282	-0.0823224	COG2207	[K] Transcription					PA14_48390	1	AraC family transcriptional	PA1229	No
PA14_50040	PA14_RS20325	operon_1787	1	0	non essential gene	C5	set2		transcriptional regulator	99.1668	0.0567834	98.7932	0.0331254	113.062	0.151805	COG0662	[K] Transcription					PA14_50040	1	transcriptional regulator	PA1109	No
PA14_53090	PA14_RS21615	operon_1788	1	1	non essential gene	C5	set2		transcriptional regulator	206.381	-0.0303495	174.376	-0.535992	377.989	-0.781407	COG1917	[K] Transcription					PA14_53090, PA14_53100, PA14_53110	3	transcriptional regulator, NA, oxidoreductase	PA0864, NA, PA0863	No
PA14_54010	PA14_RS21995	operon_1789	1	1	non essential gene	C5	set2		transcriptional regulator	247.259	0.308914	270.281	0.352705	698.33	0.460305	COG1917	[K] Transcription					PA14_54010	1	transcriptional regulator	PA0791	No
PA14_07340	PA14_RS02940	operon_179	0	1	non essential gene	C5	set2		transcriptional regulator	355.374	-0.226266	333.069	-0.0344441	910.239	-0.0495778	COG1917	[K] Transcription					PA14_07340	1	putative transcriptional regulator	PA0564	No
PA14_55730	PA14_RS22740	operon_1790	0	0	non essential gene	C5	set2		AraC family transcriptional regulator	55.8705	-0.285686	48.1626	0.417638	102.568	0.0630216	COG1917	[K] Transcription					PA14_55730, PA14_55740	2	AraC family transcriptional, putative transporter	PA4288, PA4289	No
PA14_43180	PA14_RS17545	operon_18	1	1	non essential gene	C5	set2		short chain dehydrogenase	1088.67	-0.0516563	1094.41	-0.0583162	1374.7	-0.100163	COG1028	[I] Lipid transport and metabolism					PA14_43180	1	short chain dehydrogenase	PA1649	No
PA14_43180	PA14_RS17545	operon_18	1	1	non essential gene	C5	set2		short chain dehydrogenase	1088.67	-0.0516563	1094.41	-0.0583162	1374.7	-0.100163	COG1028	[Q] Secondary metabolites biosynthesis, transport and catabolism					PA14_43180	1	short chain dehydrogenase	PA1649	No
PA14_10660	PA14_RS04300	operon_180	1	1	non essential gene	C5	set2		transcriptional regulator	1145.2	0.0667582	1179.25	0.224248	2612.94	0.264521	COG0662	[K] Transcription					PA14_10660	1	putative transcriptional regulator	PA4120	No
PA14_47460	PA14_RS19305	operon_1800	1	1	non essential gene	C5	set2	rnd	ribonuclease D	330.112	0.137362	333.631	0.213113	398.681	0.369702	COG0349	[J] Translation, ribosomal structure and biogenesis					PA14_47450, PA14_47460	2	hypothetical protein, ribonuclease D	PA1295, PA1294	No
PA14_21720	PA14_RS08755	operon_181	1	1	non essential gene	C5	set2		AraC family transcriptional regulator	1601	1.03267	1658.3	0.955561	4308.69	1.34837	COG2207	[K] Transcription					PA14_21720	1	AraC family transcriptional	PA3269	No
PA14_47360	PA14_RS19255	operon_1810	0	1	essential gene	C1	set1		oligopeptidase	68.0504	-4.4127	38.7467	-7.97102	16.1667	-7.30871	COG1770	[E] Amino acid transport and metabolism					PA14_47360	1	putative oligopeptidase	PA1304	No
PA14_16370	PA14_RS06565	operon_1811	1	0	non essential gene	C5	set2		hypothetical protein	16.8725	-0.241288	14.382	-0.456744	18.9528	-0.17564	COG2979	[S] Function unknown					PA14_16370	1	hypothetical protein	PA3712	No
PA14_23090	PA14_RS09350	operon_1812	1	1	non essential gene	C5	set2		keto-hydroxyglutarate-aldolase/keto-deoxy- phosphogluconate aldolase	898.927	-0.0343167	918.381	-0.0073217	2043.88	-0.10715	COG0800	[G] Carbohydrate transport and metabolism		essential gene		Conditional	PA14_23070, PA14_23080, PA14_23090	3	glucose-6-phosphate 1-dehydrogenase, 6-phosphogluconolactonase, keto-hydroxyglutarate-aldolase/keto-deoxy-	PA3183, PA3182, PA3181	Yes
PA14_23620	PA14_RS09575	operon_1813	1	1	non essential gene	C5	set2	kdgA	aldolase	252.398	0.162142	241.847	-0.0169592	399.915	0.107238	COG0800	[G] Carbohydrate transport and metabolism					PA14_23620, PA14_23630	2	putative aldolase, hypothetical protein	PA3131, PA3130	No
PA14_04630	PA14_RS01875	operon_1814	1	1	non essential gene	C5	set2	ilvD	dihydroxy-acid dehydratase	304.094	0.0660466	276.302	-0.168744	341.359	-0.187672	COG0129	[E] Amino acid transport and metabolism				Conditional	PA14_04630	1	dihydroxy-acid dehydratase	PA0353	Yes
PA14_22910	PA14_RS09285	operon_1815	1	1	non essential gene	C5	set2	edd	phosphogluconate dehydratase	176.758	-0.157554	172.174	-0.0669961	365.952	-0.0834682	COG0129	[G] Carbohydrate transport and metabolism		essential gene			PA14_22910	1	phosphogluconate dehydratase	PA3194	No
PA14_22910	PA14_RS09285	operon_1815	1	1	non essential gene	C5	set2	edd	phosphogluconate dehydratase	176.758	-0.157554	172.174	-0.0669961	365.952	-0.0834682	COG0129	[E] Amino acid transport and metabolism		essential gene			PA14_22910	1	phosphogluconate dehydratase	PA3194	No
PA14_23070	PA14_RS09340	operon_1816	1	1	non essential gene	C5	set2	zwf	glucose-6-phosphate 1-dehydrogenase	245.837	0.330935	283.413	0.485966	612.589	0.923056	COG0364	[G] Carbohydrate transport and metabolism				Conditional	PA14_23070, PA14_23080, PA14_23090	3	glucose-6-phosphate 1-dehydrogenase, 6-phosphogluconolactonase, keto-hydroxyglutarate-aldolase/keto-deoxy-	PA3183, PA3182, PA3181	Yes
PA14_71800	PA14_RS29235	operon_1817	1	1	non essential gene	C5	set2		glucose-6-phosphate 1-dehydrogenase	487.874	-0.0332228	495.338	0.00875551	1156.37	0.0314078	COG0364	[G] Carbohydrate transport and metabolism					PA14_71800	1	glucose-6-phosphate 1-dehydrogenase	PA5439	No
PA14_51780	PA14_RS21070	operon_1818	1	1	non essential gene	C5	set2	ruvB	Holliday junction DNA helicase RuvB	494.851	0.231852	513.641	0.467705	1134.15	0.69592	COG2255	[L] Replication, recombination and repair		essential gene			PA14_51780, PA14_51790, PA14_51800	3	Holliday junction DNA, Holliday junction DNA, Holliday junction resolvase	PA0967, PA0966, PA0965	No
PA14_51790	PA14_RS21075	operon_1818	1	1	non essential gene	C5	set2	ruvA	Holliday junction DNA helicase RuvA	417.43	0.0373071	380.369	-0.215902	416.552	-0.464249	COG0632	[L] Replication, recombination and repair		essential gene			PA14_51780, PA14_51790, PA14_51800	3	Holliday junction DNA, Holliday junction DNA, Holliday junction resolvase	PA0967, PA0966, PA0965	No
PA14_51800	PA14_RS21080	operon_1819	1	1	essential gene	C4	set2	ruvC	Holliday junction resolvase	609.006	-0.287738	494.317	-1.00733	711.746	-1.47715	COG0817	[L] Replication, recombination and repair					PA14_51780, PA14_51790, PA14_51800	3	Holliday junction DNA, Holliday junction DNA, Holliday junction resolvase	PA0967, PA0966, PA0965	No
PA14_22580	PA14_RS09150	operon_182	1	0	non essential gene	C5	set2		AraC family transcriptional regulator	11.8143	0.192021	10.0796	0.401854	25.9539	-0.0972173	COG1917	[K] Transcription					PA14_22580	1	AraC family transcriptional	PA3220	No
PA14_14380	PA14_RS05750	operon_1820	1	1	non essential gene	C5	set2		ABC transporter permease	239.085	0.0997072	238.721	-0.083226	317.695	0.0828857	COG4120	[S] Function unknown					PA14_14370, PA14_14380	2	putative ABC-transporter ATP-binding, ABC transporter permease	PA3838, PA3837	No
PA14_39320	PA14_RS15965	operon_1821	1	1	non essential gene	C5	set2	rbsC	membrane protein component of ABC ribose transporter	90.7202	0.0349398	78.9617	-0.133461	203.667	-0.12215	COG1172	[G] Carbohydrate transport and metabolism					PA14_39280, PA14_39300, PA14_39320, PA14_39330, PA14_39350	5	ribokinase, ribose operon repressor, membrane protein component, ribose transporter, binding protein component	PA1950, PA1949, PA1948, PA1947, PA1946	No
PA14_50950	PA14_RS20705	operon_1822	1	1	non essential gene	C5	set2		hypothetical protein	1172.41	-0.054007	1151.54	-0.0487223	1728.23	-0.114091	COG3012	[S] Function unknown					PA14_50950	1	hypothetical protein	PA1034	No
PA14_30670	PA14_RS12505	operon_1823	0	1	essential gene	C4	set2	pgsA	CDP-diacylglycerol--glycerol-3-phosphate 3-phosphatidyltransferase	1951.42	-0.396348	1556.61	-1.34069	1557.9	-2.35651	COG0558	[I] Lipid transport and metabolism	essential gene		essential gene	Core	PA14_30650, PA14_30660, PA14_30670	3	response regulator GacA, excinuclease ABC subunit, CDP-diacylglycerol--glycerol-3-phosphate	PA2586, PA2585, PA2584	Yes
PA14_19120	PA14_RS07660	operon_1824	1	1	non essential gene	C5	set2	rhlR	transcriptional regulator RhlR	513.12	0.0322214	556.783	0.239531	1350.11	0.319189	COG2771	[K] Transcription					PA14_19120	1	transcriptional regulator RhlR	PA3477	No
PA14_50290	PA14_RS20410	operon_1825	1	1	non essential gene	C5	set2	fliC	flagellin type B	873.984	0.247995	947.594	0.461879	1211.93	0.484081	COG1344	[N] Cell motility					PA14_50290	1	flagellin type B	PA1092	No
PA14_50160	PA14_RS20370	operon_1826	1	1	non essential gene	C5	set2	fliE	flagellar hook-basal body protein FliE	2181.77	0.222376	2313.99	0.221962	2806.52	0.359519	COG1677	[N] Cell motility					PA14_50080, PA14_50100, PA14_50110, PA14_50130, PA14_50140, PA14_50160	6	flagellar biosynthesis chaperone, flagellum-specific ATP synthase, flagellar assembly protein, flagellar motor switch, flagellar MS-ring protein, flagellar hook-basal body	PA1105, PA1104, PA1103, PA1102, PA1101, PA1100	No
PA14_26330	PA14_RS10675	operon_183	0	1	non essential gene	C5	set2		AraC family transcriptional regulator	853.532	-0.073652	849.188	-0.00564606	1085.29	-0.0970815	COG2207	[K] Transcription					PA14_26330	1	AraC family transcriptional	PA2917	No
PA14_02690	PA14_RS01085	operon_1834	1	0	non essential gene	C5	set2		amino acid permease	19.4466	0.615866	23.9734	0.438055	35.0181	0.199711	COG0531	[E] Amino acid transport and metabolism					PA14_02680, PA14_02690, PA14_02700, PA14_02720	4	putative aldehyde dehydrogenase, putative amino acid, putative aminotransferase, hypothetical protein	PA0219, PA0220, PA0221, PA0222	No
PA14_04210	PA14_RS01715	operon_1835	1	1	non essential gene	C5	set2		transporter	1049.97	0.207013	1130.64	0.262845	1806.32	0.445289	COG0531	[E] Amino acid transport and metabolism					PA14_04190, PA14_04210	2	acetylpolyamine aminohydrolase, putative transporter	PA0321, PA0322	No
PA14_11210	PA14_RS04530	operon_1836	1	1	non essential gene	C5	set2		amino acid permease	549.161	-0.083354	549.586	0.00608133	658.866	-0.0841412	COG0531	[E] Amino acid transport and metabolism					PA14_11210, PA14_11230	2	putative amino acid, hypothetical protein	PA4072, PA4071	No
PA14_17740	PA14_RS07140	operon_1838	1	1	non essential gene	C5	set2		amino acid ABC transporter permease	1019.15	-0.000603603	976.255	-0.146326	1343.37	-0.0871468	COG0531	[E] Amino acid transport and metabolism					PA14_17740	1	amino acid ABC	PA3597	No
PA14_32450	PA14_RS13240	operon_184	1	0	non essential gene	C5	set2		AraC family transcriptional regulator	198.349	-0.143272	197.225	0.0169448	258.917	0.111971	COG2207	[K] Transcription					PA14_32450, PA14_32460	2	AraC family transcriptional, putative transcriptional regulator	PA2489, PA2488	No
PA14_72710	PA14_RS29595	operon_1841	1	1	non essential gene	C5	set2		transporter	1299.21	-0.0681974	1242.08	-0.142142	1870.35	-0.129283	COG0531	[E] Amino acid transport and metabolism					PA14_72650, PA14_72660, PA14_72690, PA14_72700, PA14_72710	5	hypothetical protein, hypothetical protein, putative glutamine synthetase, hypothetical protein, putative transporter	PA5506, PA5507, PA5508, PA5509, PA5510	No
PA14_43580	PA14_RS17700	operon_185	1	1	non essential gene	C5	set2		transcriptional regulator	2359.23	0.0333471	2279.65	-0.161226	4383.92	-0.168085	COG1917	[K] Transcription	essential gene				PA14_43580, PA14_43600	2	putative transcriptional regulator, hypothetical protein	PA1619, PA1618	No
PA14_47420	PA14_RS19285	operon_1855	1	1	non essential gene	C5	set2		hypothetical protein	7222.87	-0.0588198	6938.49	-0.0913156	8101.59	-0.0542255	COG1937	[S] Function unknown	essential gene				PA14_47390, PA14_47400, PA14_47410, PA14_47420	4	putative transmembrane sensor, RNA polymerase ECF-subfamily, hypothetical protein, hypothetical protein	PA1301, PA1300, PA1299, PA1298	No
PA14_19065	PA14_RS07640	operon_1856	0	1	essential gene	C4	set2		hypothetical protein	9011.21	-0.242386	7861.51	-0.620851	7910.29	-1.22425	COG0489	[D] Cell cycle control, cell division, chromosome partitioning			essential gene	Core	PA14_19065	1	hypothetical protein	PA3481	Yes
PA14_52430	PA14_RS21345	operon_1857	1	1	non essential gene	C5	set2		hypothetical protein	372.926	0.147048	368.069	-0.137164	425.981	-0.0527247	COG4807	[S] Function unknown					PA14_52430, PA14_52440	2	hypothetical protein, hypothetical protein	PA0915, PA0914	No
PA14_53020	PA14_RS21590	operon_1858	1	1	non essential gene	C5	set2	pbpG	D-alanyl-D-alanine endopeptidase	2559.45	0.0132751	2533.3	-0.177167	3444.23	-0.320204	COG1686	[M] Cell wall/membrane/envelope biogenesis					PA14_53020	1	D-alanyl-D-alanine endopeptidase	PA0869	No
PA14_36410	PA14_RS14820	operon_1859	1	0	non essential gene	C5	set2		hypothetical protein	29.9059	-0.315212	27.5632	0.37407	63.9026	0.390674	28H8Z	[S] Function unknown					PA14_36410	1	hypothetical protein	PA2178	No
PA14_49050	PA14_RS19920	operon_1860	1	1	non essential gene	C5	set2		hypothetical protein	2524.03	-0.209083	2376.26	-0.322892	2728.27	-0.580061	28H8Z	[S] Function unknown					PA14_49050	1	hypothetical protein	PA1190	No
PA14_54190	PA14_RS22060	operon_187	1	0	non essential gene	C5	set2	pruR	proline utilization regulator	55.8057	0.357575	50.7487	0.353611	113.515	0.627786	COG2207	[K] Transcription					PA14_54190	1	proline utilization regulator	PA0780	No
PA14_70530	PA14_RS28720	operon_188	0	1	non essential gene	C5	set2		AraC family transcriptional regulator	617.667	-0.0899987	596.385	-0.00510652	728.007	-0.127978	COG2207	[K] Transcription					PA14_70530, PA14_70550	2	AraC family transcriptional, hypothetical protein	PA5342, PA5343	No
PA14_39650	PA14_RS16070	operon_1897	0	1	non essential gene	C5	set2		TonB-dependent receptor	488.64	-0.0947767	498.869	-0.133293	997.55	-0.0635644	COG1629	[P] Inorganic ion transport and metabolism					PA14_39620, PA14_39630, PA14_39640, PA14_39650	4	hypothetical protein, hypothetical protein, cobaltochelatase subunit CobN, putative TonB-dependent receptor	PA1925, PA1924, PA1923, PA1922	No
PA14_44090	PA14_RS17905	operon_1898	1	1	non essential gene	C5	set2		Fe-S-cluster oxidoreductase	824.722	0.0111838	850.257	0.117293	1465.9	0.276888	COG0727	[S] Function unknown					PA14_44090	1	putative Fe-S-cluster oxidoreductase	PA1578.1	No
PA14_14220	PA14_RS05680	operon_1899	1	1	non essential gene	C5	set2		nucleoid-associated protein NdpA	258.988	0.0953014	253.243	-0.038573	617.703	-0.0585919	COG3081	[S] Function unknown					PA14_14220	1	nucleoid-associated protein NdpA	PA3849	No
PA14_44570	PA14_RS18120	operon_19	1	1	non essential gene	C5	set2		short-chain dehydrogenase	796.801	-0.0536409	758.895	-0.149825	1455.61	-0.379352	COG1028	[I] Lipid transport and metabolism					PA14_44560, PA14_44570	2	putative flavin-containing monooxygenase, putative short-chain dehydrogenase	PA1538, PA1537	No
PA14_44570	PA14_RS18120	operon_19	1	1	non essential gene	C5	set2		short-chain dehydrogenase	796.801	-0.0536409	758.895	-0.149825	1455.61	-0.379352	COG1028	[Q] Secondary metabolites biosynthesis, transport and catabolism					PA14_44560, PA14_44570	2	putative flavin-containing monooxygenase, putative short-chain dehydrogenase	PA1538, PA1537	No
PA14_13750	PA14_RS05535	operon_190	0	1	non essential gene	C5	set2	narK1	nitrite extrusion protein 1	512.313	-0.00733592	496.767	-0.0155531	795.398	-0.0899767	COG2223	[P] Inorganic ion transport and metabolism					PA14_13750, PA14_13770, PA14_13780, PA14_13800, PA14_13810, PA14_13830, PA14_13840, PA14_13850	8	nitrite extrusion protein, nitrite extrusion protein, putative respiratory nitrate, respiratory nitrate reductase, respiratory nitrate reductase, respiratory nitrate reductase, putative peptidyl-prolyl cis-trans, NA	PA3877, PA3876, PA3875, PA3874, PA3873, PA3872, PA3871, NA	No
PA14_59050	PA14_RS24100	operon_1900	1	1	non essential gene	C5	set2	NdpA2	NdpA2	347.536	-0.00959744	354.009	-0.0468565	805.118	0.10153	COG3081	[S] Function unknown		essential gene			PA14_59050	1	NA	NA	No
PA14_19470	PA14_RS07785	operon_1901	1	1	non essential gene	C5	set2	mqoA	malate:quinone oxidoreductase	222.691	-0.0490849	220.212	0.240222	302.653	0.147443	COG0579	[C] Energy production and conversion					PA14_19470, PA14_19480	2	malate:quinone oxidoreductase, hypothetical protein	PA3452, PA3451	No
PA14_61400	PA14_RS25085	operon_1902	0	1	essential gene	C3	set1	mqoB	malate:quinone oxidoreductase	12.0328	-1.87401	5.61623	-1.26822	3.49379	-2.55768	COG0579	[C] Energy production and conversion		essential gene		Conditional	PA14_61400	1	malate:quinone oxidoreductase	PA4640	Yes
PA14_58230	PA14_RS23750	operon_1903	1	1	non essential gene	C5	set2		hypothetical protein	614.439	-0.0126251	605.679	0.114744	748.113	0.0987658	COG4676	[S] Function unknown					PA14_58230	1	hypothetical protein	PA4487	No
PA14_58240	PA14_RS23755	operon_1903	0	1	non essential gene	C5	set2		hypothetical protein	477.855	0.124834	514.248	0.247413	857.053	0.347506	COG5445	[S] Function unknown					PA14_58240, PA14_58250, PA14_58260, PA14_58270	4	hypothetical protein, hypothetical protein, hypothetical protein, hypothetical protein	PA4488, PA4489, PA4490, PA4491	No
PA14_58250	PA14_RS23760	operon_1903	0	1	non essential gene	C5	set2		hypothetical protein	1664.68	-0.0750891	1607.92	-0.042335	2144.63	-0.097917	COG2373	[S] Function unknown					PA14_58240, PA14_58250, PA14_58260, PA14_58270	4	hypothetical protein, hypothetical protein, hypothetical protein, hypothetical protein	PA4488, PA4489, PA4490, PA4491	No
PA14_58260	PA14_RS23765	operon_1903	1	1	non essential gene	C5	set2		hypothetical protein	387.941	-0.174018	360.034	-0.0425644	800.08	0.0397101	COG3234	[S] Function unknown					PA14_58240, PA14_58250, PA14_58260, PA14_58270	4	hypothetical protein, hypothetical protein, hypothetical protein, hypothetical protein	PA4488, PA4489, PA4490, PA4491	No
PA14_58270	PA14_RS23770	operon_1903	1	1	non essential gene	C5	set2		hypothetical protein	1804.64	0.0232202	1831.12	0.0333424	4236.11	0.0663793	COG4685	[S] Function unknown					PA14_58240, PA14_58250, PA14_58260, PA14_58270	4	hypothetical protein, hypothetical protein, hypothetical protein, hypothetical protein	PA4488, PA4489, PA4490, PA4491	No
PA14_23260	PA14_RS09415	operon_1904	1	0	essential gene	C1	set2	gyrA	DNA gyrase subunit A	57.1838	-2.29292	36.7689	-6.02514	35.8303	-8.68827	COG0188	[L] Replication, recombination and repair	essential gene	essential gene	essential gene	Core	PA14_23260	1	DNA gyrase subunit	PA3168	Yes
PA14_56920	PA14_RS23200	operon_1905	1	1	non essential gene	C5	set2	inaA	InaA protein	1188.83	-0.078824	1182.5	-0.0605113	1625.5	-0.133672	COG3642	[T] Signal transduction mechanisms					PA14_56910, PA14_56920, PA14_56930	3	hypothetical protein, InaA protein, hypothetical protein	PA4377, PA4378, PA4379	No
PA14_66200	PA14_RS27020	operon_1906	1	1	non essential gene	C5	set2		hypothetical protein	150.883	0.0565515	146.731	-0.0944846	348.605	-0.0834614	COG0515	[T] Signal transduction mechanisms		essential gene			PA14_66190, PA14_66200, PA14_66210, PA14_66220, PA14_66230, PA14_66240, PA14_66250, PA14_66260	8	hypothetical protein, hypothetical protein, hypothetical protein, lipopolysaccharide kinase WaaP, UDP-glucose:(heptosyl) LPS alpha, lipopolysaccharide heptosyltransferase I, heptosyltransferase II, branched-chain amino acid	PA5006, PA5007, PA5008, PA5009, PA5010, PA5011, PA5012, PA5013	Yes
PA14_66200	PA14_RS27020	operon_1906	1	1	non essential gene	C5	set2		hypothetical protein	150.883	0.0565515	146.731	-0.0944846	348.605	-0.0834614	COG0515	[L] Replication, recombination and repair		essential gene			PA14_66190, PA14_66200, PA14_66210, PA14_66220, PA14_66230, PA14_66240, PA14_66250, PA14_66260	8	hypothetical protein, hypothetical protein, hypothetical protein, lipopolysaccharide kinase WaaP, UDP-glucose:(heptosyl) LPS alpha, lipopolysaccharide heptosyltransferase I, heptosyltransferase II, branched-chain amino acid	PA5006, PA5007, PA5008, PA5009, PA5010, PA5011, PA5012, PA5013	Yes
PA14_66200	PA14_RS27020	operon_1906	1	1	non essential gene	C5	set2		hypothetical protein	150.883	0.0565515	146.731	-0.0944846	348.605	-0.0834614	COG0515	[K] Transcription		essential gene			PA14_66190, PA14_66200, PA14_66210, PA14_66220, PA14_66230, PA14_66240, PA14_66250, PA14_66260	8	hypothetical protein, hypothetical protein, hypothetical protein, lipopolysaccharide kinase WaaP, UDP-glucose:(heptosyl) LPS alpha, lipopolysaccharide heptosyltransferase I, heptosyltransferase II, branched-chain amino acid	PA5006, PA5007, PA5008, PA5009, PA5010, PA5011, PA5012, PA5013	Yes
PA14_01400	PA14_RS00585	operon_1910	1	1	non essential gene	C5	set2		hypothetical protein	438.828	0.0386213	451.609	0.0674463	713.641	0.206241	COG2153	[S] Function unknown					PA14_01400	1	hypothetical protein	PA0115	No
PA14_14360	PA14_RS05740	operon_1911	1	1	non essential gene	C5	set2		sodium:sulfate symporter	125.409	-0.14038	121.303	-0.182937	290.51	-0.129171	COG0471	[P] Inorganic ion transport and metabolism					PA14_14360	1	putative sodium:sulfate symporter	PA3839	No
PA14_23890	PA14_RS09680	operon_1915	1	1	non essential gene	C5	set2		hypothetical protein	729.93	0.0176579	732.215	-0.0602588	929.289	-0.0429745	COG3147	[S] Function unknown					PA14_23860, PA14_23880, PA14_23890	3	acetyl-CoA carboxylase subunit, folylpolyglutamate synthetase, hypothetical protein	PA3112, PA3111, PA3110	Yes
PA14_23860	PA14_RS09670	operon_1916	0	0	non essential gene	C5	set2	accD	acetyl-CoA carboxylase subunit beta	48.9198	-0.694961	55.4274	-0.404325	85.3814	0.0169985	COG0777	[I] Lipid transport and metabolism	essential gene	essential gene	essential gene	Core	PA14_23860, PA14_23880, PA14_23890	3	acetyl-CoA carboxylase subunit, folylpolyglutamate synthetase, hypothetical protein	PA3112, PA3111, PA3110	Yes
PA14_23880	PA14_RS09675	operon_1916	0	1	non essential gene	C5	set2	folC	folylpolyglutamate synthetase	1150.23	-0.237471	922.967	-0.525078	1022	-0.69635	COG0285	[H] Coenzyme transport and metabolism		essential gene	essential gene	Core	PA14_23860, PA14_23880, PA14_23890	3	acetyl-CoA carboxylase subunit, folylpolyglutamate synthetase, hypothetical protein	PA3112, PA3111, PA3110	Yes
PA14_38730	PA14_RS15735	operon_1918	1	1	essential gene	C4	set1		major facilitator superfamily transporter	912.924	-0.214645	533.798	-0.799871	201.931	-1.37565	COG0477	[U] Intracellular trafficking, secretion, and vesicular transport					PA14_38730	1	major facilitator superfamily	PA1993	No
PA14_43620	PA14_RS17715	operon_1922	1	1	non essential gene	C5	set2		phosphohistidine phosphatase SixA	4247.82	-0.0793452	3766.65	-0.419481	4070.41	-0.879868	COG2062	[T] Signal transduction mechanisms					PA14_43620, PA14_43630, PA14_43640	3	putative phosphohistidine phosphatase, putative lipase, NAD(P)H-dependent glycerol-3-phosphate	PA1616, PA1615, PA1614	No
PA14_22290	PA14_RS09025	operon_1923	1	1	non essential gene	C5	set2	vacJ	hypothetical protein	157.614	0.155143	159.502	-0.0113563	388.15	0.148456	COG2853	[M] Cell wall/membrane/envelope biogenesis					PA14_22290, PA14_22310	2	hypothetical protein, hypothetical protein	PA3239, PA3238	No
PA14_27920	PA14_RS11320	operon_1924	1	0	non essential gene	C5	set2		hypothetical protein	39.6275	0.240794	40.3571	-0.91343	83.5414	-0.390206	COG2853	[M] Cell wall/membrane/envelope biogenesis					PA14_27920	1	hypothetical protein	PA2800	No
PA14_22930	PA14_RS09290	operon_1927	1	0	non essential gene	C5	set2	glk	glucokinase	64.1385	-0.182095	66.5588	0.257847	80.094	0.123556	COG0837	[G] Carbohydrate transport and metabolism					PA14_22930, PA14_22940, PA14_22960	3	glucokinase, two-component response regulator, putative two-component sensor	PA3193, PA3192, PA3191	No
PA14_53800	PA14_RS21905	operon_1928	1	1	non essential gene	C5	set2	mntH2	manganese transport protein MntH	263.719	0.0284585	248.917	-0.172983	555.393	-0.485665	COG1914	[P] Inorganic ion transport and metabolism		essential gene			PA14_53770, PA14_53780, PA14_53790, PA14_53800	4	hypothetical protein, MFS family transporter, putative haloacid dehalogenase, manganese transport protein	PA0812, PA0811, PA0810, PA0809	No
PA14_56340	PA14_RS22975	operon_1929	1	1	non essential gene	C5	set2	mntH1	manganese transport protein MntH	447.122	0.0245138	447.634	-0.167689	699.988	-0.216258	COG1914	[P] Inorganic ion transport and metabolism					PA14_56340	1	manganese transport protein	PA4334	No
PA14_44670	PA14_RS18165	operon_1932	1	1	non essential gene	C5	set2	zipA	cell division protein ZipA	324.317	-0.105064	303.195	0.0385038	758.611	0.14486	COG3115	[D] Cell cycle control, cell division, chromosome partitioning		essential gene			PA14_44670	1	cell division protein	PA1528	No
PA14_28340	PA14_RS11510	operon_1958	1	1	essential gene	C4	set1		hypothetical protein	278.099	-0.708174	136.098	-1.54983	84.5064	-2.58174	COG2837	[P] Inorganic ion transport and metabolism					PA14_28340	1	hypothetical protein	PA2765	No
PA14_66680	PA14_RS27215	operon_1959	1	1	non essential gene	C5	set2	maeB	malic enzyme	101.809	-0.0910319	102.662	-0.185551	214.834	-0.460993	COG0281	[C] Energy production and conversion					PA14_66680	1	malic enzyme	PA5046	No
PA14_68380	PA14_RS27880	operon_1960	1	0	non essential gene	C5	set2	nudE	ADP-ribose diphosphatase NudE	47.3897	0.0759688	53.049	0.64883	124.013	0.792641	COG0494	[L] Replication, recombination and repair					PA14_68370, PA14_68380	2	3'(2'),5'-bisphosphate nucleotidase, ADP-ribose diphosphatase NudE	PA5175, PA5176	No
PA14_14080	PA14_RS05630	operon_1961	1	1	non essential gene	C5	set2		carboxylesterase	238.348	-0.064984	257.363	-0.0234606	310.762	-0.0111468	COG0400	[S] Function unknown					PA14_14080	1	carboxylesterase	PA3859	No
PA14_51240	PA14_RS20825	operon_1962	1	1	non essential gene	C5	set2	purC	phosphoribosylaminoimidazole-succinocarboxamide synthase	676.019	-0.152661	720.445	0.00901305	833.266	-0.0273187	COG0152	[F] Nucleotide transport and metabolism					PA14_51240	1	phosphoribosylaminoimidazole-succinocarboxamide	PA1013	No
PA14_51260	PA14_RS20835	operon_1963	1	1	non essential gene	C5	set2		hypothetical protein	922.139	-0.300397	933.408	-0.255799	1086.93	-0.308142	COG3317	[M] Cell wall/membrane/envelope biogenesis					PA14_51250, PA14_51260, PA14_51270	3	hypothetical protein, hypothetical protein, dihydrodipicolinate synthase	PA1012, PA1011, PA1010	Yes
PA14_51270	PA14_RS20840	operon_1963	0	1	essential gene	C2	set2	dapA	dihydrodipicolinate synthase	72.257	-0.536443	46.3851	-2.87854	86.5159	-4.60831	COG0329	[E] Amino acid transport and metabolism	essential gene	essential gene	essential gene	Conditional	PA14_51250, PA14_51260, PA14_51270	3	hypothetical protein, hypothetical protein, dihydrodipicolinate synthase	PA1012, PA1011, PA1010	Yes
PA14_52010	PA14_RS21175	operon_1964	0	1	essential gene	C3	set1		DNA replication initiation factor	5.43654	-2.62303	1.4159	-3.90518	0.316628	-1.65281	COG0593	[L] Replication, recombination and repair	essential gene		essential gene	Core	PA14_52010	1	DNA replication initiation	PA0947	Yes
PA14_61470	PA14_RS25115	operon_1965	0	0	non essential gene	C5	set2	upp	uracil phosphoribosyltransferase	141.817	0.0125131	133.136	-0.283598	163.705	-0.329383	COG0035	[F] Nucleotide transport and metabolism					PA14_61470, PA14_61480	2	uracil phosphoribosyltransferase, uracil permease	PA4646, PA4647	No
PA14_14930	PA14_RS05950	operon_1968	1	1	non essential gene	C5	set2	engA	GTP-binding protein EngA	257.779	0.487193	288.706	0.942904	405.172	1.28274	COG1160	[S] Function unknown	essential gene	essential gene	essential gene	Core	PA14_14930	1	GTP-binding protein EngA	PA3799	Yes
PA14_14890	PA14_RS05935	operon_1969	1	1	non essential gene	C5	set2	hisS	histidyl-tRNA synthetase	867.632	-0.203738	844.068	-0.172024	1163.75	-0.380428	COG0124	[J] Translation, ribosomal structure and biogenesis		essential gene	essential gene	Core	PA14_14820, PA14_14830, PA14_14850, PA14_14860, PA14_14880, PA14_14890, PA14_14900, PA14_14910	8	nucleoside diphosphate kinase, hypothetical protein, type 4 fimbrial, hypothetical protein, NA, histidyl-tRNA synthetase, hypothetical protein, hypothetical protein	PA3807, PA3806, PA3805, PA3804, NA, PA3802, PA3801, PA3800	Yes
PA14_14900	PA14_RS05940	operon_1969	0	1	essential gene	C4	set2		hypothetical protein	114.45	-0.823302	99.3355	-1.74017	117.68	-1.12635	COG2976	[S] Function unknown		essential gene			PA14_14820, PA14_14830, PA14_14850, PA14_14860, PA14_14880, PA14_14890, PA14_14900, PA14_14910	8	nucleoside diphosphate kinase, hypothetical protein, type 4 fimbrial, hypothetical protein, NA, histidyl-tRNA synthetase, hypothetical protein, hypothetical protein	PA3807, PA3806, PA3805, PA3804, NA, PA3802, PA3801, PA3800	Yes
PA14_14910	PA14_RS05945	operon_1969	0	1	essential gene	C4	set2		hypothetical protein	387.783	-0.361927	323.69	-0.745717	358.987	-1.37887	COG1520	[M] Cell wall/membrane/envelope biogenesis					PA14_14820, PA14_14830, PA14_14850, PA14_14860, PA14_14880, PA14_14890, PA14_14900, PA14_14910	8	nucleoside diphosphate kinase, hypothetical protein, type 4 fimbrial, hypothetical protein, NA, histidyl-tRNA synthetase, hypothetical protein, hypothetical protein	PA3807, PA3806, PA3805, PA3804, NA, PA3802, PA3801, PA3800	Yes
PA14_14860	PA14_RS05925	operon_1970	0	0	essential gene	C1	set1		hypothetical protein	9.58418	-3.15278	5.96019	-5.9943	3.18882	-4.96955	COG1426	[S] Function unknown		essential gene			PA14_14820, PA14_14830, PA14_14850, PA14_14860, PA14_14880, PA14_14890, PA14_14900, PA14_14910	8	nucleoside diphosphate kinase, hypothetical protein, type 4 fimbrial, hypothetical protein, NA, histidyl-tRNA synthetase, hypothetical protein, hypothetical protein	PA3807, PA3806, PA3805, PA3804, NA, PA3802, PA3801, PA3800	Yes
PA14_14880	PA14_RS05930	operon_1970	1	1	essential gene	C3	set1	ispG	4-hydroxy-3-methylbut-2-en-1-yl diphosphate synthase	604.808	-1.00504	391.709	-1.9103	239.908	-2.94747	COG0821	[I] Lipid transport and metabolism	essential gene	essential gene	essential gene	Core	PA14_14820, PA14_14830, PA14_14850, PA14_14860, PA14_14880, PA14_14890, PA14_14900, PA14_14910	8	nucleoside diphosphate kinase, hypothetical protein, type 4 fimbrial, hypothetical protein, NA, histidyl-tRNA synthetase, hypothetical protein, hypothetical protein	PA3807, PA3806, PA3805, PA3804, NA, PA3802, PA3801, PA3800	Yes
PA14_14830	PA14_RS05915	operon_1971	1	1	non essential gene	C5	set2		hypothetical protein	488.796	0.676925	548.277	0.815257	953.621	1.15463	COG0820	[J] Translation, ribosomal structure and biogenesis					PA14_14820, PA14_14830, PA14_14850, PA14_14860, PA14_14880, PA14_14890, PA14_14900, PA14_14910	8	nucleoside diphosphate kinase, hypothetical protein, type 4 fimbrial, hypothetical protein, NA, histidyl-tRNA synthetase, hypothetical protein, hypothetical protein	PA3807, PA3806, PA3805, PA3804, NA, PA3802, PA3801, PA3800	Yes
PA14_40730	PA14_RS16510	operon_1972	1	0	non essential gene	C5	set2		ribosomal RNA large subunit methyltransferase N	84.9901	0.122362	90.1024	0.213749	209.903	0.458349	COG0820	[H] Coenzyme transport and metabolism					PA14_40730	1	hypothetical protein	PA1839	No
PA14_14820	PA14_RS05910	operon_1973	0	1	essential gene	C3	set1	ndk	nucleoside diphosphate kinase	31.0423	-2.32997	19.2483	-1.60022	14.8931	-1.72354	COG0105	[F] Nucleotide transport and metabolism	essential gene	essential gene	essential gene	Conditional	PA14_14820, PA14_14830, PA14_14850, PA14_14860, PA14_14880, PA14_14890, PA14_14900, PA14_14910	8	nucleoside diphosphate kinase, hypothetical protein, type 4 fimbrial, hypothetical protein, NA, histidyl-tRNA synthetase, hypothetical protein, hypothetical protein	PA3807, PA3806, PA3805, PA3804, NA, PA3802, PA3801, PA3800	Yes
PA14_14780	PA14_RS05895	operon_1974	1	1	non essential gene	C5	set2	hscA	chaperone protein HscA	1018.17	-0.852889	885.23	-0.913382	1356.2	-0.685296	COG0443	[O] Posttranslational modification, protein turnover, chaperones			essential gene	Core	PA14_14740, PA14_14750, PA14_14770, PA14_14780	4	scaffold protein, putative iron-binding protein, co-chaperone HscB, chaperone protein HscA	PA3813, PA3812, PA3811, PA3810	Yes
PA14_14800	PA14_RS05900	operon_1974	1	1	non essential gene	C5	set2	fdx2	ferredoxin 2Fe-2S	289.115	-0.0205991	310.1	0.0654981	665.899	0.15869	COG0633	[C] Energy production and conversion	essential gene	essential gene		Core	PA14_14800, PA14_14810	2	ferredoxin (2Fe-2S), hypothetical protein	PA3809, PA3808	Yes
PA14_14810	PA14_RS05905	operon_1974	1	1	non essential gene	C5	set2		hypothetical protein	477.087	0.118301	464.628	-0.104692	543.517	-0.0297581	COG2975	[S] Function unknown					PA14_14800, PA14_14810	2	ferredoxin (2Fe-2S), hypothetical protein	PA3809, PA3808	Yes
PA14_14770	PA14_RS05890	operon_1975	1	1	essential gene	C4	set2	hscB	co-chaperone HscB	1740.2	-0.573031	1459.15	-1.39484	1752.54	-2.24832	COG1076	[O] Posttranslational modification, protein turnover, chaperones	essential gene	essential gene	essential gene	Core	PA14_14740, PA14_14750, PA14_14770, PA14_14780	4	scaffold protein, putative iron-binding protein, co-chaperone HscB, chaperone protein HscA	PA3813, PA3812, PA3811, PA3810	Yes
PA14_15740	PA14_RS06305	operon_1981	0	1	non essential gene	C5	set2	purL	phosphoribosylformylglycinamidine synthase	460.219	-0.113268	397.304	-0.305101	567.952	-0.853596	COG0046	[F] Nucleotide transport and metabolism		essential gene		Conditional	PA14_15740, PA14_15750	2	phosphoribosylformylglycinamidine synthase, NA	PA3763, NA	Yes
PA14_54410	PA14_RS22140	operon_1982	1	1	essential gene	C4	set1	mucB	negative regulator for alginate biosynthesis MucB	194.596	-0.383593	117.688	-0.695999	44.7653	-1.12344	COG3026	[T] Signal transduction mechanisms					PA14_54400, PA14_54410	2	positive regulator for, negative regulator for	PA0765, PA0764	No
PA14_54420	PA14_RS22145	operon_1982	0	1	essential gene	C3	set1	mucA	anti-sigma factor MucA	132.578	-1.50474	54.2099	-2.74043	32.4107	-3.70107	COG3073	[T] Signal transduction mechanisms		essential gene		Conditional	PA14_54420, PA14_54430	2	anti-sigma factor MucA, RNA polymerase sigma	PA0763, PA0762	Yes
PA14_54430	PA14_RS22150	operon_1983	1	1	non essential gene	C5	set2	algU	RNA polymerase sigma factor AlgU	263.563	-0.073746	289.773	-0.246202	335.183	-0.142497	COG1595	[K] Transcription					PA14_54420, PA14_54430	2	anti-sigma factor MucA, RNA polymerase sigma	PA0763, PA0762	Yes
PA14_42790	PA14_RS17380	operon_1984	1	0	non essential gene	C5	set2		N5-glutamine S-adenosyl-L-methionine-dependent methyltransferase	83.9881	-0.126646	92.4346	-0.174293	105.957	-0.261945	COG2890	[J] Translation, ribosomal structure and biogenesis					PA14_42790	1	N5-glutamine S-adenosyl-L-methionine-dependent	PA1678	No
PA14_61680	PA14_RS25205	operon_1985	0	1	non essential gene	C5	set2	prmC	S-adenosylmethionine-dependent methyltransferase, PrmC	510.786	0.336474	514.186	0.49724	702.929	0.735604	COG2890	[J] Translation, ribosomal structure and biogenesis					PA14_61660, PA14_61670, PA14_61680, PA14_61700, PA14_61710	5	glutamate racemase, molybdopterin biosynthesis protein, putative methyl transferase, peptide chain release, glutamyl-tRNA reductase	PA4662, PA4663, PA4664, PA4665, PA4666	Yes
PA14_01100	PA14_RS00455	operon_1990	1	1	non essential gene	C5	set2	clpV1	ClpV1	3715.13	-0.169878	3435.6	-0.290891	5067.44	-0.561389	COG0542	[O] Posttranslational modification, protein turnover, chaperones					PA14_01100, PA14_01110	2	putative ClpA/B-type chaperone, hypothetical protein	PA0090, PA0091	No
PA14_33990	PA14_RS13865	operon_1992	0	1	non essential gene	C5	set2	clpV3	ClpV3	5932.47	-0.0734922	5367	-0.35214	6305.8	-0.564554	COG0542	[O] Posttranslational modification, protein turnover, chaperones					PA14_33940, PA14_33960, PA14_33970, PA14_33980, PA14_33990, PA14_34000, PA14_34010, PA14_34020, PA14_34030, PA14_34050, PA14_34070	11	hypothetical protein, hypothetical protein, NA, NA, putative ClpA/B-type protease, hypothetical protein, hypothetical protein, hypothetical protein, hypothetical protein, hypothetical protein, hypothetical protein	PA2374, PA2373, NA, NA, PA2371, PA2370, PA2369, PA2368, PA2367, PA2366, PA2365	No
PA14_60190	PA14_RS24560	operon_1993	0	1	non essential gene	C5	set2	clpB	clpB protein	172.153	0.579988	217.131	0.950492	420.76	1.21405	COG0542	[O] Posttranslational modification, protein turnover, chaperones					PA14_60190	1	clpB protein	PA4542	No
PA14_15970	PA14_RS06395	operon_1994	1	1	non essential gene	C5	set2	rpsP	30S ribosomal protein S16	160.083	0.175964	164.492	0.422718	376.935	0.401777	COG0228	[J] Translation, ribosomal structure and biogenesis	essential gene	essential gene		Conditional	PA14_15970, PA14_15980, PA14_15990	3	30S ribosomal protein, 16S rRNA-processing protein, tRNA (guanine-N(1)-)-methyltransferase	PA3745, PA3744, PA3743	Yes
PA14_15980	PA14_RS06400	operon_1994	1	1	essential gene	C1	set1	rimM	16S rRNA-processing protein RimM	789.605	-3.1978	409.293	-6.07315	179.975	-7.08772	COG0806	[J] Translation, ribosomal structure and biogenesis	essential gene	essential gene	essential gene	Core	PA14_15970, PA14_15980, PA14_15990	3	30S ribosomal protein, 16S rRNA-processing protein, tRNA (guanine-N(1)-)-methyltransferase	PA3745, PA3744, PA3743	Yes
PA14_15990	PA14_RS06405	operon_1994	1	0	non essential gene	C5	set2	trmD	tRNA (guanine-N(1)-)-methyltransferase	70.4734	0.305792	69.124	0.239734	168.211	0.452407	COG0336	[J] Translation, ribosomal structure and biogenesis		essential gene	essential gene	Conditional	PA14_15970, PA14_15980, PA14_15990	3	30S ribosomal protein, 16S rRNA-processing protein, tRNA (guanine-N(1)-)-methyltransferase	PA3745, PA3744, PA3743	Yes
PA14_16000	PA14_RS06410	operon_1994	1	1	essential gene	C3	set1	rplS	50S ribosomal protein L19	449.342	-1.11851	260.351	-0.839989	140.734	-0.865951	COG0335	[J] Translation, ribosomal structure and biogenesis		essential gene			PA14_16000	1	50S ribosomal protein	PA3742	No
PA14_15960	PA14_RS06390	operon_1995	1	0	essential gene	C3	set1	ffh	signal recognition particle protein Ffh	222.261	-1.70971	129.79	-2.05202	73.2562	-1.70955	COG0541	[U] Intracellular trafficking, secretion, and vesicular transport		essential gene	essential gene	Core	PA14_15960	1	signal recognition particle	PA3746	Yes
PA14_63040	PA14_RS25770	operon_1997	1	1	non essential gene	C5	set2		hypothetical protein	709.025	0.106324	769.99	0.239146	951.852	0.184538	COG2914	[S] Function unknown					PA14_63040, PA14_63050	2	hypothetical protein, hypothetical protein	PA4766, PA4767	No
PA14_63050	PA14_RS25775	operon_1997	0	1	non essential gene	C5	set2		hypothetical protein	358.517	-0.0170408	335.977	-0.150063	393.979	0.0108122	COG2867	[I] Lipid transport and metabolism		essential gene			PA14_63040, PA14_63050	2	hypothetical protein, hypothetical protein	PA4766, PA4767	No
PA14_68400	PA14_RS27890	operon_1998	1	1	non essential gene	C5	set2		LysM domain/BON superfamily protein	312.985	0.376973	364.721	0.676479	482.345	0.948923	COG1652	[S] Function unknown					PA14_68400	1	LysM domain/BON superfamily	PA5178	No
PA14_07370	PA14_RS02955	operon_1999	1	0	non essential gene	C5	set2		hypothetical protein	25.5386	-0.327251	26.5286	-0.475559	51.7664	-0.215447	COG0401	[S] Function unknown					PA14_07370	1	hypothetical protein	PA0567	No
PA14_57010	PA14_RS23240	operon_2	1	1	essential gene	C3	set2	groEL	chaperonin GroEL	341.305	-1.28662	259.443	-3.23346	571.346	-3.85015	COG0459	[O] Posttranslational modification, protein turnover, chaperones			essential gene	Core	PA14_57010, PA14_57020	2	chaperonin GroEL, co-chaperonin GroES	PA4385, PA4386	Yes
PA14_57020	PA14_RS23245	operon_2	1	1	essential gene	C4	set2	groES	co-chaperonin GroES	431.419	-0.812409	326.707	-1.92603	387.54	-2.14543	COG0234	[O] Posttranslational modification, protein turnover, chaperones	essential gene	essential gene	essential gene	Core	PA14_57010, PA14_57020	2	chaperonin GroEL, co-chaperonin GroES	PA4385, PA4386	Yes
PA14_45430	PA14_RS18455	operon_20	1	1	non essential gene	C5	set2		short chain dehydrogenase	1045.2	0.102885	1107.93	0.250318	1397.42	0.359858	COG1028	[I] Lipid transport and metabolism					PA14_45430, PA14_45440, PA14_45450, PA14_45460	4	short chain dehydrogenase, hypothetical protein, hypothetical protein, hypothetical protein	PA1470, PA1469, PA1468, PA1467	No
PA14_45430	PA14_RS18455	operon_20	1	1	non essential gene	C5	set2		short chain dehydrogenase	1045.2	0.102885	1107.93	0.250318	1397.42	0.359858	COG1028	[Q] Secondary metabolites biosynthesis, transport and catabolism					PA14_45430, PA14_45440, PA14_45450, PA14_45460	4	short chain dehydrogenase, hypothetical protein, hypothetical protein, hypothetical protein	PA1470, PA1469, PA1468, PA1467	No
PA14_68730	PA14_RS28020	operon_2000	1	0	non essential gene	C5	set2	gshA	glutamate--cysteine ligase	97.3977	-0.12006	91.8316	0.0661164	181.672	-0.0670229	COG2918	[H] Coenzyme transport and metabolism					PA14_68730	1	glutamate--cysteine ligase	PA5203	No
PA14_52570	PA14_RS21410	operon_2001	0	1	non essential gene	C5	set2	rsmA	carbon storage regulator	697.418	-0.0313633	593.452	-0.239542	649.626	-0.199693	COG1551	[J] Translation, ribosomal structure and biogenesis					PA14_52570	1	carbon storage regulator	PA0905	No
PA14_52600	PA14_RS21420	operon_2002	0	0	essential gene	C1	set1	alaS	alanyl-tRNA synthetase	2.13784	-4.4982	0.980727	-3.39017			COG0013	[J] Translation, ribosomal structure and biogenesis			essential gene	Core	PA14_52600, PA14_52610	2	alanyl-tRNA synthetase, hypothetical protein	PA0903, PA0902	Yes
PA14_17540	PA14_RS07045	operon_2003	1	1	non essential gene	C5	set2	recX	recombination regulator RecX	1042.48	-0.0227673	1051.65	0.00657973	1299.46	-0.0210473	COG2137	[S] Function unknown					PA14_17540	1	recombination regulator RecX	PA3616	No
PA14_17530	PA14_RS07040	operon_2004	1	1	essential gene	C4	set2	recA	recombinase A	286.28	-0.254579	233.545	-0.786711	461.233	-1.16671	COG0468	[L] Replication, recombination and repair		essential gene			PA14_17530	1	recombinase A	PA3617	No
PA14_12080	PA14_RS04885	operon_2007	1	1	non essential gene	C5	set2	sltB1	soluble lytic transglycosylase B	1158.79	0.0903379	1165.77	0.177519	1454.62	0.140674	COG2951	[M] Cell wall/membrane/envelope biogenesis					PA14_12080, PA14_12090	2	soluble lytic transglycosylase, RlpA family lipoprotein	PA4001, PA4000	No
PA14_12160	PA14_RS04925	operon_2008	1	1	non essential gene	C5	set2		murein transglycosylase	6990.6	-0.124476	6755.28	-0.218514	7435.29	-0.287144	COG2951	[M] Cell wall/membrane/envelope biogenesis					PA14_12160	1	putative murein transglycosylase	PA3992	No
PA14_49280	PA14_RS20015	operon_2009	1	1	non essential gene	C5	set2		transglycosylase	124.071	-0.116337	116.982	-0.138822	287.976	0.162873	COG2951	[M] Cell wall/membrane/envelope biogenesis					PA14_49280	1	transglycolase	PA1171	No
PA14_57730	PA14_RS23535	operon_2010	0	0	non essential gene	C5	set2	mltB1	murein hydrolase B	36.7964	0.089742	42.5293	0.333529	99.2385	0.504496	COG2951	[M] Cell wall/membrane/envelope biogenesis					PA14_57730	1	murein hydrolase B	PA4444	No
PA14_52180	PA14_RS21245	operon_2018	1	1	non essential gene	C5	set2	relA	GTP pyrophosphokinase	5751.06	-0.0198309	5994.81	0.0507401	8471.97	0.0423392	COG0317	[K] Transcription					PA14_52180	1	GTP pyrophosphokinase	PA0934	No
PA14_52180	PA14_RS21245	operon_2018	1	1	non essential gene	C5	set2	relA	GTP pyrophosphokinase	5751.06	-0.0198309	5994.81	0.0507401	8471.97	0.0423392	COG0317	[T] Signal transduction mechanisms					PA14_52180	1	GTP pyrophosphokinase	PA0934	No
PA14_70470	PA14_RS28700	operon_2019	1	1	non essential gene	C5	set2	spoT	guanosine-3',5'-bis(diphosphate) 3'-pyrophosphohydrolase	535.887	-0.114165	494.023	-0.225879	856.981	-0.507605	COG0317	[K] Transcription			essential gene		PA14_70470	1	guanosine-3',5'-bis(diphosphate)	PA5338	No
PA14_70470	PA14_RS28700	operon_2019	1	1	non essential gene	C5	set2	spoT	guanosine-3',5'-bis(diphosphate) 3'-pyrophosphohydrolase	535.887	-0.114165	494.023	-0.225879	856.981	-0.507605	COG0317	[T] Signal transduction mechanisms			essential gene		PA14_70470	1	guanosine-3',5'-bis(diphosphate)	PA5338	No
PA14_49350	PA14_RS20050	operon_2024	1	1	non essential gene	C5	set2		hypothetical protein	2468.9	-0.135311	2542.98	-0.129633	3018.56	0.169224	COG1179	[H] Coenzyme transport and metabolism					PA14_49350	1	hypothetical protein	PA1164	No
PA14_48520	PA14_RS19690	operon_2025	1	1	essential gene	C4	set1		membrane-bound lytic murein transglycosylase A	687.078	-0.347315	487.084	-0.973541	326.147	-1.43075	COG2821	[M] Cell wall/membrane/envelope biogenesis					PA14_48520	1	putative membrane-bound lytic	PA1222	No
PA14_73040	PA14_RS29735	operon_2026	1	1	non essential gene	C5	set2	amiA	N-acetylmuramoyl-L-alanine amidase	1131.78	0.178187	1122.5	0.226835	1735.21	0.230878	COG0860	[M] Cell wall/membrane/envelope biogenesis					PA14_73040	1	N-acetylmuramoyl-L-alanine amidase	PA5538	No
PA14_55660	PA14_RS22715	operon_2027	1	1	non essential gene	C5	set2	recD	exodeoxyribonuclease V subunit alpha	329.628	0.226945	310.246	-0.0449545	752.682	-0.0896146	COG0507	[L] Replication, recombination and repair		essential gene	essential gene	Core	PA14_55660, PA14_55670, PA14_55690, PA14_55710	4	exodeoxyribonuclease V alpha, exodeoxyribonuclease V beta, exodeoxyribonuclease V gamma, hypothetical protein	PA4283, PA4284, PA4285, PA4286	Yes
PA14_55670	PA14_RS22720	operon_2027	1	1	non essential gene	C5	set2	recB	exodeoxyribonuclease V subunit beta	2039.45	-0.110528	1893.44	-0.243256	2183.99	-0.489988	COG1074	[L] Replication, recombination and repair		essential gene		Core	PA14_55660, PA14_55670, PA14_55690, PA14_55710	4	exodeoxyribonuclease V alpha, exodeoxyribonuclease V beta, exodeoxyribonuclease V gamma, hypothetical protein	PA4283, PA4284, PA4285, PA4286	Yes
PA14_55690	PA14_RS22725	operon_2028	1	1	essential gene	C4	set2	recC	exodeoxyribonuclease V subunit gamma	233.285	0.0487995	173.767	-0.990836	171.702	-2.28132	COG1330	[L] Replication, recombination and repair				Core	PA14_55660, PA14_55670, PA14_55690, PA14_55710	4	exodeoxyribonuclease V alpha, exodeoxyribonuclease V beta, exodeoxyribonuclease V gamma, hypothetical protein	PA4283, PA4284, PA4285, PA4286	Yes
PA14_04460	PA14_RS01815	operon_2029	1	0	non essential gene	C5	set2	lgt	prolipoprotein diacylglyceryl transferase	67.1303	0.208039	66.2408	0.1287	76.8626	-0.104574	COG0682	[M] Cell wall/membrane/envelope biogenesis		essential gene	essential gene	Core	PA14_04460	1	prolipoprotein diacylglyceryl transferase	PA0341	Yes
PA14_04480	PA14_RS01820	operon_2029	0	0	non essential gene	C5	set2	thyA	thymidylate synthase	71.6667	-0.986317	59.1302	-0.696829	61.1753	0.135749	COG0207	[F] Nucleotide transport and metabolism	essential gene		essential gene	Core	PA14_04480	1	thymidylate synthase	PA0342	Yes
PA14_49390	PA14_RS20065	operon_203	1	1	non essential gene	C5	set2	rrmA	rRNA methyltransferase	3539.13	0.00496407	3408.35	-0.103873	8777.58	-0.158058	COG0500	[Q] Secondary metabolites biosynthesis, transport and catabolism					PA14_49380, PA14_49390	2	succinyl-diaminopimelate desuccinylase, rRNA methyltransferase	PA1162, PA1161	Yes
PA14_58630	PA14_RS23910	operon_2030	0	1	non essential gene	C5	set2		ornithine decarboxylase	959.284	0.0472393	963.309	-0.0158975	2138.09	0.00646316	COG0019	[E] Amino acid transport and metabolism					PA14_58630	1	ornithine decarboxylase	PA4519	No
PA14_69670	PA14_RS28400	operon_2031	1	1	non essential gene	C5	set2	lysA	diaminopimelate decarboxylase	780.178	-0.505122	726.914	-0.630084	777.554	-0.936709	COG0019	[E] Amino acid transport and metabolism				Conditional	PA14_69660, PA14_69670, PA14_69690, PA14_69700, PA14_69710, PA14_69720	6	NA, diaminopimelate decarboxylase, diaminopimelate epimerase, hypothetical protein, NA, putative hydrolase	NA, PA5277, PA5278, PA5279, NA, PA5281	Yes
PA14_18160	PA14_RS07295	operon_204	1	1	essential gene	C4	set1		oxidoreductase	819.97	-0.293747	549.72	-0.760385	335.904	-1.04426	COG0604	[C] Energy production and conversion					PA14_18160, PA14_18180	2	putative oxidoreductase, hypothetical protein	PA3567, PA3566	No
PA14_63900	PA14_RS26130	operon_2042	1	1	non essential gene	C5	set2		hemolyin III	312.085	-0.0181929	295.709	0.115631	426.182	0.0208919	COG1272	[S] Function unknown					PA14_63900	1	putative hemolyin III	PA4833	No
PA14_36660	PA14_RS14920	operon_205	1	1	non essential gene	C5	set2		alcohol dehydrogenase	339.228	-0.0221284	314.747	-0.198249	364.092	-0.112295	COG1063	[C] Energy production and conversion		essential gene			PA14_36570, PA14_36580, PA14_36590, PA14_36605, PA14_36620, PA14_36630, PA14_36650, PA14_36660, PA14_36670, PA14_36680, PA14_36690, PA14_36700	12	glycogen synthase, putative glycosyl hydrolase, putative 4-alpha-glucanotransferase, putative glycosyl hydrolase, hypothetical protein, putative glycosyl hydrolase, hypothetical protein, putative alcohol dehydrogenase, hypothetical protein, hypothetical protein, cardiolipin synthase 2, hypothetical protein	PA2165, PA2164, PA2163, PA2162, PA2161, PA2160, PA2159, PA2158, PA2157, PA2156, PA2155, PA2154	No
PA14_53110	PA14_RS21625	operon_206	1	1	non essential gene	C5	set2		oxidoreductase	444.952	0.163565	440.85	0.153611	1168.42	0.248893	COG0604	[C] Energy production and conversion					PA14_53090, PA14_53100, PA14_53110	3	transcriptional regulator, NA, oxidoreductase	PA0864, NA, PA0863	No
PA14_33000	PA14_RS13455	operon_2065	1	1	non essential gene	C5	set2	gcvP2	glycine dehydrogenase	549.175	0.111382	568.959	0.150369	685.417	0.182373	COG0403	[E] Amino acid transport and metabolism					PA14_32985, PA14_33000, PA14_33010, PA14_33030	4	glycine cleavage system, glycine dehydrogenase, serine hydroxymethyltransferase, L-serine dehydratase	PA2446, PA2445, PA2444, PA2443	No
PA14_68850	PA14_RS28070	operon_2066	1	1	non essential gene	C5	set2	gcvP1	glycine dehydrogenase	658.395	-0.128821	645.235	0.0504084	852.995	0.0672895	COG0403	[E] Amino acid transport and metabolism					PA14_68850	1	glycine dehydrogenase	PA5213	No
PA14_68860	PA14_RS28075	operon_2067	1	1	non essential gene	C5	set2	gcvH1	glycine cleavage system protein H	118.399	-0.324887	106.329	-0.393621	221.823	-0.706315	COG0509	[E] Amino acid transport and metabolism					PA14_68860	1	glycine cleavage system	PA5214	No
PA14_68870	PA14_RS28080	operon_2067	1	0	non essential gene	C5	set2	gcvT	glycine cleavage system aminomethyltransferase T	30.3216	0.215595	36.5823	0.561561	68.9625	0.498313	COG0404	[E] Amino acid transport and metabolism					PA14_68870	1	NA	NA	No
PA14_56770	PA14_RS23135	operon_2068	1	1	non essential gene	C5	set2		transporter	300.87	-0.250619	302.952	-0.053079	418.693	-0.237808	COG1279	[S] Function unknown					PA14_56750, PA14_56770	2	hypothetical protein, putative transporter	PA4364, PA4365	No
PA14_65040	PA14_RS26595	operon_2069	1	1	non essential gene	C5	set2		hypothetical protein	206.698	0.289718	219.199	0.269854	269.65	0.415162	COG0668	[M] Cell wall/membrane/envelope biogenesis					PA14_65030, PA14_65040	2	hypothetical protein, hypothetical protein	PA4924, PA4925	No
PA14_71560	PA14_RS29140	operon_207	1	1	non essential gene	C5	set2	fdhA	glutathione-independent formaldehyde dehydrogenase	174.966	-0.0565879	177.039	-0.189389	187.532	-0.326513	COG1063	[E] Amino acid transport and metabolism					PA14_71560	1	glutathione-independent formaldehyde	PA5421	No
PA14_07190	PA14_RS02880	operon_2070	1	1	non essential gene	C5	set2	pgk	phosphoglycerate kinase	845.902	0.12995	854.607	0.152421	2173.85	0.273115	COG0126	[F] Nucleotide transport and metabolism		essential gene	essential gene	Conditional	PA14_07190, PA14_07200	2	phosphoglycerate kinase, hypothetical protein	PA0552, PA0553	Yes
PA14_63990	PA14_RS26160	operon_2072	1	1	non essential gene	C5	set2	speA	arginine decarboxylase	1740.51	-0.0353642	1718.75	0.0446123	3029.96	0.0253634	COG1166	[E] Amino acid transport and metabolism					PA14_63990	1	arginine decarboxylase	PA4839	No
PA14_05180	PA14_RS02100	operon_2073	1	1	non essential gene	C5	set2	pilT	twitching motility protein PilT	584.178	-0.0736005	582.97	-0.218348	1370.59	-0.217621	COG2805	[N] Cell motility					PA14_05180, PA14_05190	2	twitching motility protein, twitching motility protein	PA0395, PA0396	No
PA14_05180	PA14_RS02100	operon_2073	1	1	non essential gene	C5	set2	pilT	twitching motility protein PilT	584.178	-0.0736005	582.97	-0.218348	1370.59	-0.217621	COG2805	[U] Intracellular trafficking, secretion, and vesicular transport					PA14_05180, PA14_05190	2	twitching motility protein, twitching motility protein	PA0395, PA0396	No
PA14_05190	PA14_RS02105	operon_2074	1	1	non essential gene	C5	set2	pilU	twitching motility protein PilU	259.989	0.00992122	250.036	-0.478067	329.507	-0.626554	COG5008	[N] Cell motility					PA14_05180, PA14_05190	2	twitching motility protein, twitching motility protein	PA0395, PA0396	No
PA14_05190	PA14_RS02105	operon_2074	1	1	non essential gene	C5	set2	pilU	twitching motility protein PilU	259.989	0.00992122	250.036	-0.478067	329.507	-0.626554	COG5008	[U] Intracellular trafficking, secretion, and vesicular transport					PA14_05180, PA14_05190	2	twitching motility protein, twitching motility protein	PA0395, PA0396	No
PA14_16020	PA14_RS06420	operon_2075	0	1	non essential gene	C5	set2		hypothetical protein	3215.47	0.0308501	3179.25	-0.0458269	3559.53	-0.0226083	2DMQV	[S] Function unknown					PA14_16020	1	hypothetical protein	PA3740	No
PA14_59340	PA14_RS24215	operon_2079	1	1	non essential gene	C5	set2	pilT2	type IV B pilus protein	2177.87	-0.0396703	2188.28	0.05142	3009.35	0.0550625	COG2805	[N] Cell motility					PA14_59240, PA14_59250, PA14_59270, PA14_59280, PA14_59290, PA14_59310, PA14_59320, PA14_59340, PA14_59350, PA14_59360	10	NA, NA, NA, NA, NA, NA, NA, NA, NA, NA	NA, NA, NA, NA, NA, NA, NA, NA, NA, NA	No
PA14_59340	PA14_RS24215	operon_2079	1	1	non essential gene	C5	set2	pilT2	type IV B pilus protein	2177.87	-0.0396703	2188.28	0.05142	3009.35	0.0550625	COG2805	[U] Intracellular trafficking, secretion, and vesicular transport					PA14_59240, PA14_59250, PA14_59270, PA14_59280, PA14_59290, PA14_59310, PA14_59320, PA14_59340, PA14_59350, PA14_59360	10	NA, NA, NA, NA, NA, NA, NA, NA, NA, NA	NA, NA, NA, NA, NA, NA, NA, NA, NA, NA	No
PA14_71630	PA14_RS29170	operon_208	1	1	non essential gene	C5	set2	adhA	alcohol dehydrogenase	293.628	-0.171253	272.817	-0.121506	454.808	-0.260079	COG1064	[S] Function unknown					PA14_71630	1	alcohol dehydrogenase	PA5427	No
PA14_68820	PA14_RS28055	operon_2080	1	1	non essential gene	C5	set2		secretion pathway ATPase	102.937	-0.0292989	88.1323	-0.0638955	209.983	-0.380322	COG2804	[U] Intracellular trafficking, secretion, and vesicular transport					PA14_68820	1	putative secretion pathway	PA5210	No
PA14_68820	PA14_RS28055	operon_2080	1	1	non essential gene	C5	set2		secretion pathway ATPase	102.937	-0.0292989	88.1323	-0.0638955	209.983	-0.380322	COG2804	[N] Cell motility					PA14_68820	1	putative secretion pathway	PA5210	No
PA14_35440	PA14_RS14420	operon_2081	0	1	non essential gene	C5	set2	ansA	L-asparaginase I	10775	-0.222457	8965.73	-0.535836	10160.1	-0.762042	COG0252	[E] Amino acid transport and metabolism					PA14_35440	1	L-asparaginase I	PA2253	No
PA14_35440	PA14_RS14420	operon_2081	0	1	non essential gene	C5	set2	ansA	L-asparaginase I	10775	-0.222457	8965.73	-0.535836	10160.1	-0.762042	COG0252	[J] Translation, ribosomal structure and biogenesis					PA14_35440	1	L-asparaginase I	PA2253	No
PA14_24700	PA14_RS10005	operon_2082	1	0	essential gene	C2	set1		hypothetical protein	936.676	-1.94336	479.154	-3.89666	246.951	-5.75268	COG3171	[S] Function unknown					PA14_24700	1	hypothetical protein	PA3046	No
PA14_40690	PA14_RS16495	operon_2083	1	1	non essential gene	C5	set2		hypothetical protein	2350.8	-0.0891477	2289.58	-0.0175503	2836.19	-0.0198452	COG3171	[S] Function unknown					PA14_40670, PA14_40690	2	B12-dependent methionine synthase, hypothetical protein	PA1843, PA1842	No
PA14_58770	PA14_RS23965	operon_2086	0	1	non essential gene	C5	set2	pilD	type 4 prepilin peptidase PilD	427.512	0.142228	431.955	0.0664458	712.246	0.216278	COG1989	[N] Cell motility					PA14_58760, PA14_58770, PA14_58780, PA14_58790	4	type 4 fimbrial, type 4 prepilin, dephospho-CoA kinase, zinc-binding protein	PA4527, PA4528, PA4529, PA4530	Yes
PA14_58770	PA14_RS23965	operon_2086	0	1	non essential gene	C5	set2	pilD	type 4 prepilin peptidase PilD	427.512	0.142228	431.955	0.0664458	712.246	0.216278	COG1989	[O] Posttranslational modification, protein turnover, chaperones					PA14_58760, PA14_58770, PA14_58780, PA14_58790	4	type 4 fimbrial, type 4 prepilin, dephospho-CoA kinase, zinc-binding protein	PA4527, PA4528, PA4529, PA4530	Yes
PA14_58770	PA14_RS23965	operon_2086	0	1	non essential gene	C5	set2	pilD	type 4 prepilin peptidase PilD	427.512	0.142228	431.955	0.0664458	712.246	0.216278	COG1989	[U] Intracellular trafficking, secretion, and vesicular transport					PA14_58760, PA14_58770, PA14_58780, PA14_58790	4	type 4 fimbrial, type 4 prepilin, dephospho-CoA kinase, zinc-binding protein	PA4527, PA4528, PA4529, PA4530	Yes
PA14_29850	PA14_RS12175	operon_209	1	1	non essential gene	C5	set2	nuoN	NADH dehydrogenase subunit N	135.286	-0.213544	108.409	-0.692443	153.642	-0.982918	COG1007	[C] Energy production and conversion					PA14_29850, PA14_29860, PA14_29880, PA14_29890, PA14_29900, PA14_29920, PA14_29930, PA14_29940	8	NADH dehydrogenase subunit, NADH dehydrogenase subunit, NADH dehydrogenase subunit, NADH dehydrogenase subunit, NADH dehydrogenase subunit, NADH dehydrogenase subunit, NADH dehydrogenase subunit, NADH dehydrogenase subunit	PA2649, PA2648, PA2647, PA2646, PA2645, PA2644, PA2643, PA2642	No
PA14_43840	PA14_RS17810	operon_2091	1	1	non essential gene	C5	set2		hypothetical protein	2205.93	0.0693717	2340.42	0.18243	3729.21	0.185943	COG0412	[Q] Secondary metabolites biosynthesis, transport and catabolism					PA14_43840, PA14_43850	2	hypothetical protein, heat shock protein	PA1597, PA1596	No
PA14_49330	PA14_RS20040	operon_2092	1	1	non essential gene	C5	set2		hypothetical protein	970.089	-0.0243534	959.457	-0.0856788	1235.33	-0.086223	COG0412	[Q] Secondary metabolites biosynthesis, transport and catabolism					PA14_49330	1	hypothetical protein	PA1166	No
PA14_60530	PA14_RS24725	operon_2093	1	1	non essential gene	C5	set2		hypothetical protein	180.204	-0.0587529	167.728	-0.0460664	365.907	-0.0782073	COG2862	[S] Function unknown					PA14_60530	1	hypothetical protein	PA4574	No
PA14_02500	PA14_RS01005	operon_2094	1	1	non essential gene	C5	set2	exbB1	transport protein ExbB	346.008	0.0564609	357.881	0.0137715	836.226	0.287374	COG0811	[U] Intracellular trafficking, secretion, and vesicular transport					PA14_02490, PA14_02500, PA14_02510	3	hypothetical protein, transport protein ExbB, transport protein ExbD	PA0197, PA0198, PA0199	No
PA14_02510	PA14_RS01010	operon_2094	1	1	non essential gene	C5	set2	exbD1	transport protein ExbD	282.515	0.276812	305.563	0.392228	387.035	0.653797	COG0848	[U] Intracellular trafficking, secretion, and vesicular transport					PA14_02490, PA14_02500, PA14_02510	3	hypothetical protein, transport protein ExbB, transport protein ExbD	PA0197, PA0198, PA0199	No
PA14_51740	PA14_RS21055	operon_2095	1	1	essential gene	C2	set1	tolR	TolR protein	995.807	-1.74402	448.084	-4.30782	309.228	-6.59845	COG0848	[U] Intracellular trafficking, secretion, and vesicular transport	essential gene	essential gene	essential gene	Core	PA14_51720, PA14_51730, PA14_51740, PA14_51750, PA14_51770	5	translocation protein TolB, TolA protein, TolR protein, TolQ protein, hypothetical protein	PA0972, PA0971, PA0970, PA0969, PA0968	Yes
PA14_51750	PA14_RS21060	operon_2095	0	1	essential gene	C2	set1	tolQ	TolQ protein	41.2819	-1.67672	16.6535	-3.35068	9.60525	-5.05662	COG0811	[U] Intracellular trafficking, secretion, and vesicular transport		essential gene	essential gene	Core	PA14_51720, PA14_51730, PA14_51740, PA14_51750, PA14_51770	5	translocation protein TolB, TolA protein, TolR protein, TolQ protein, hypothetical protein	PA0972, PA0971, PA0970, PA0969, PA0968	Yes
PA14_55340	PA14_RS22555	operon_2096	1	1	non essential gene	C5	set2	exbD2	transport protein ExbD	215.437	0.102159	207.818	0.0342033	445.548	-0.178148	COG0848	[U] Intracellular trafficking, secretion, and vesicular transport		essential gene			PA14_55250, PA14_55260, PA14_55280, PA14_55290, PA14_55300, PA14_55320, PA14_55330, PA14_55340, PA14_55360, PA14_55380, PA14_55390	11	transcriptional regulator, hypothetical protein, putative peptidyl-prolyl cis-trans, hypothetical protein, hypothetical protein, hypothetical protein, hypothetical protein, transport protein ExbD, transport protein ExbB2, hypothetical protein, hypothetical protein	PA0701, PA0700, PA0699, PA0698, PA0697, PA0696, PA0695, PA0694, PA0693, PA0692, PA0691	Yes
PA14_55360	PA14_RS22560	operon_2096	0	1	non essential gene	C5	set2	exbB2	transport protein ExbB2	817.085	0.0744084	821.44	0.169395	1122.26	0.297166	COG0811	[U] Intracellular trafficking, secretion, and vesicular transport					PA14_55250, PA14_55260, PA14_55280, PA14_55290, PA14_55300, PA14_55320, PA14_55330, PA14_55340, PA14_55360, PA14_55380, PA14_55390	11	transcriptional regulator, hypothetical protein, putative peptidyl-prolyl cis-trans, hypothetical protein, hypothetical protein, hypothetical protein, hypothetical protein, transport protein ExbD, transport protein ExbB2, hypothetical protein, hypothetical protein	PA0701, PA0700, PA0699, PA0698, PA0697, PA0696, PA0695, PA0694, PA0693, PA0692, PA0691	Yes
PA14_35140	PA14_RS14305	operon_2097	1	1	non essential gene	C5	set2		AraC family transcriptional regulator	156.605	0.104154	148.936	-0.309641	263.974	-0.150909	COG2207	[K] Transcription					PA14_35140	1	AraC family transcriptional	PA2276	No
PA14_46400	PA14_RS18835	operon_2099	1	1	non essential gene	C5	set2		transcriptional regulator	1373.46	0.359547	1351.71	0.144409	1450.48	0.252135	COG2207	[K] Transcription					PA14_46400	1	putative transcriptional regulator	PA1380	No
PA14_46890	PA14_RS19055	operon_21	1	1	non essential gene	C5	set2		short-chain dehydrogenase	305.956	0.155423	308.441	0.354769	398.264	0.164543	COG1028	[I] Lipid transport and metabolism					PA14_46890	1	putative short-chain dehydrogenase	PA1344	No
PA14_46890	PA14_RS19055	operon_21	1	1	non essential gene	C5	set2		short-chain dehydrogenase	305.956	0.155423	308.441	0.354769	398.264	0.164543	COG1028	[Q] Secondary metabolites biosynthesis, transport and catabolism					PA14_46890	1	putative short-chain dehydrogenase	PA1344	No
PA14_29880	PA14_RS12185	operon_210	1	1	non essential gene	C5	set2	nuoL	NADH dehydrogenase subunit L	98.3561	-0.0649577	79.7014	-0.354458	128.102	-0.534464	COG1009	[C] Energy production and conversion					PA14_29850, PA14_29860, PA14_29880, PA14_29890, PA14_29900, PA14_29920, PA14_29930, PA14_29940	8	NADH dehydrogenase subunit, NADH dehydrogenase subunit, NADH dehydrogenase subunit, NADH dehydrogenase subunit, NADH dehydrogenase subunit, NADH dehydrogenase subunit, NADH dehydrogenase subunit, NADH dehydrogenase subunit	PA2649, PA2648, PA2647, PA2646, PA2645, PA2644, PA2643, PA2642	No
PA14_29880	PA14_RS12185	operon_210	1	1	non essential gene	C5	set2	nuoL	NADH dehydrogenase subunit L	98.3561	-0.0649577	79.7014	-0.354458	128.102	-0.534464	COG1009	[P] Inorganic ion transport and metabolism					PA14_29850, PA14_29860, PA14_29880, PA14_29890, PA14_29900, PA14_29920, PA14_29930, PA14_29940	8	NADH dehydrogenase subunit, NADH dehydrogenase subunit, NADH dehydrogenase subunit, NADH dehydrogenase subunit, NADH dehydrogenase subunit, NADH dehydrogenase subunit, NADH dehydrogenase subunit, NADH dehydrogenase subunit	PA2649, PA2648, PA2647, PA2646, PA2645, PA2644, PA2643, PA2642	No
PA14_65080	PA14_RS26610	operon_2100	1	1	non essential gene	C5	set2		hypothetical protein	145.436	-0.126488	128.724	-0.103752	245.107	-0.136246	COG1032	[C] Energy production and conversion					PA14_65080	1	hypothetical protein	PA4928	No
PA14_65605	PA14_RS26800	operon_2102	1	1	non essential gene	C5	set2	parC	DNA topoisomerase IV subunit A	4093.53	-0.0595616	3952.46	-0.125107	8432.54	-0.128817	COG0188	[L] Replication, recombination and repair		essential gene	essential gene	Core	PA14_65590, PA14_65605, PA14_65630, PA14_65640, PA14_65660	5	hypothetical protein, DNA topoisomerase IV, hypothetical protein, hypothetical protein, DNA topoisomerase IV	PA4963, PA4964, PA4965, PA4966, PA4967	Yes
PA14_65690	PA14_RS26825	operon_2103	1	1	non essential gene	C5	set2		hypothetical protein	120.055	-0.263843	115.201	-0.404818	166.521	-0.908203	COG1409	[S] Function unknown	essential gene				PA14_65690	1	hypothetical protein	PA4969	No
PA14_27390	PA14_RS11070	operon_2104	1	1	non essential gene	C5	set2		hypothetical protein	526.681	-0.0693769	538.416	-0.152172	887.155	-0.125681	COG3384	[S] Function unknown					PA14_27390	1	hypothetical protein	PA2839	No
PA14_66060	PA14_RS26965	operon_2105	1	0	essential gene	C1	set1	rfaE	bifunctional heptose 7-phosphate kinase/heptose 1-phosphate adenyltransferase	294.344	-2.52518	173.16	-5.70358	117.329	-10.1681	COG0615	[H] Coenzyme transport and metabolism	essential gene		essential gene	Core	PA14_66060	1	bifunctional heptose 7-phosphate	PA4996	Yes
PA14_39190	PA14_RS15910	operon_2106	1	1	non essential gene	C5	set2	bacA	UDP pyrophosphate phosphatase	404.416	0.0302825	372.47	-0.128575	438.126	0.0229235	COG1968	[V] Defense mechanisms					PA14_39190	1	undecaprenyl pyrophosphate phosphatase	PA1959	No
PA14_07590	PA14_RS03040	operon_2107	1	1	essential gene	C4	set1	folB	dihydroneopterin aldolase	1990	-0.488604	771.304	-1.78946	264.17	-2.60165	COG1539	[H] Coenzyme transport and metabolism	essential gene	essential gene	essential gene	Core	PA14_07590, PA14_07600	2	dihydroneopterin aldolase, putative	PA0582, PA0583	Yes
PA14_19620	PA14_RS07855	operon_2108	1	1	non essential gene	C5	set2	folX	D-erythro-7,8-dihydroneopterin triphosphate 2'-epimerase	7064.7	-0.0497459	7051.09	-0.0627384	8026.25	-0.112147	COG1539	[H] Coenzyme transport and metabolism					PA14_19620	1	D-erythro-7,8-dihydroneopterin triphosphate	PA3439	No
PA14_07570	PA14_RS03030	operon_2109	1	1	non essential gene	C5	set2	gcp	DNA-binding/iron metalloprotein/AP endonuclease	122.666	-0.270242	117.367	-0.759486	223.122	-0.632364	COG0533	[O] Posttranslational modification, protein turnover, chaperones	essential gene		essential gene	Core	PA14_07570	1	O-sialoglycoprotein endopeptidase	PA0580	Yes
PA14_50710	PA14_RS20590	operon_211	1	0	non essential gene	C5	set2	shaD	ShaD	175.462	0.363404	190.933	0.741781	298.228	0.910531	COG0651	[C] Energy production and conversion					PA14_50680, PA14_50690, PA14_50700, PA14_50710, PA14_50720, PA14_50730	6	putative monovalent cation/H+, putative monovalent cation/H+, putative monovalent cation/H+, putative monovalent cation/H+, putative monovalent cation/H+, putative monovalent cation/H+	PA1059, PA1058, PA1057, PA1056, PA1055, PA1054	No
PA14_50710	PA14_RS20590	operon_211	1	0	non essential gene	C5	set2	shaD	ShaD	175.462	0.363404	190.933	0.741781	298.228	0.910531	COG0651	[P] Inorganic ion transport and metabolism					PA14_50680, PA14_50690, PA14_50700, PA14_50710, PA14_50720, PA14_50730	6	putative monovalent cation/H+, putative monovalent cation/H+, putative monovalent cation/H+, putative monovalent cation/H+, putative monovalent cation/H+, putative monovalent cation/H+	PA1059, PA1058, PA1057, PA1056, PA1055, PA1054	No
PA14_38220	PA14_RS15535	operon_2110	1	0	non essential gene	C5	set2		hypothetical protein	21.2341	-0.0460773	15.5806	-0.290445	34.7526	0.0313935	COG2375	[P] Inorganic ion transport and metabolism					PA14_38210, PA14_38220	2	hypothetical protein, hypothetical protein	PA2034, PA2033	No
PA14_22570	PA14_RS09145	operon_2111	1	1	non essential gene	C5	set2	csaA	CsaA protein	2745.73	-0.0901304	2559.03	-0.174401	5745.51	-0.252797	COG0073	[J] Translation, ribosomal structure and biogenesis					PA14_22560, PA14_22570	2	putative permease, CsaA protein	PA3222, PA3221	No
PA14_61090	PA14_RS24955	operon_2112	0	0	non essential gene	C5	set2		hypothetical protein	33.5679	0.432248	41.1546	0.636055	85.9645	0.663226	COG2813	[J] Translation, ribosomal structure and biogenesis					PA14_61090	1	hypothetical protein	PA4617	No
PA14_61220	PA14_RS25010	operon_2113	1	1	non essential gene	C5	set2		hypothetical protein	252.789	-0.165512	278.298	0.22288	616.291	-0.00862625	COG2813	[J] Translation, ribosomal structure and biogenesis					PA14_61220	1	hypothetical protein	PA4627	No
PA14_57470	PA14_RS23425	operon_2117	1	1	non essential gene	C5	set2		hypothetical protein	500.429	-0.207503	517.198	0.0155843	581.098	-0.13145	COG0313	[H] Coenzyme transport and metabolism					PA14_57470	1	hypothetical protein	PA4422	No
PA14_62710	PA14_RS25630	operon_2119	1	0	essential gene	C4	set2	pnp	polynucleotide phosphorylase	26.6727	-0.475372	20.5211	-0.697231	26.1836	-2.03746	COG1185	[J] Translation, ribosomal structure and biogenesis				Core	PA14_62710	1	polynucleotide phosphorylase/polyadenylase	PA4740	Yes
PA14_42670	PA14_RS17320	operon_212	1	1	non essential gene	C5	set2		hypothetical protein	2074.93	0.271725	2019.03	0.156823	2060.06	0.37326	COG1368	[M] Cell wall/membrane/envelope biogenesis					PA14_42670	1	hypothetical protein	PA1689	No
PA14_62720	PA14_RS25635	operon_2120	1	1	essential gene	C2	set1	rpsO	30S ribosomal protein S15	138.068	-1.49882	146.341	-3.2919	72.05	-4.8885	COG0184	[J] Translation, ribosomal structure and biogenesis	essential gene	essential gene	essential gene	Core	PA14_62720	1	30S ribosomal protein	PA4741	Yes
PA14_62840	PA14_RS25685	operon_2121	1	0	essential gene	C4	set1	glmM	phosphoglucosamine mutase	1989.2	-0.0748508	1052.92	-0.647198	605.979	-1.49472	COG1109	[G] Carbohydrate transport and metabolism			essential gene	Core	PA14_62840, PA14_62850, PA14_62860	3	phosphoglucosamine mutase, dihydropteroate synthase, cell division protein	PA4749, PA4750, PA4751	Yes
PA14_62850	PA14_RS25690	operon_2123	1	1	non essential gene	C5	set2	folP	dihydropteroate synthase	970.051	-0.16367	940.163	-0.213495	1037.51	-0.480632	COG0294	[H] Coenzyme transport and metabolism	essential gene		essential gene	Core	PA14_62840, PA14_62850, PA14_62860	3	phosphoglucosamine mutase, dihydropteroate synthase, cell division protein	PA4749, PA4750, PA4751	Yes
PA14_62870	PA14_RS25700	operon_2125	1	1	essential gene	C2	set1	rrmJ	cell division protein FtsJ	240.78	-1.19696	93.7197	-2.1774	33.9457	-4.40187	COG0293	[J] Translation, ribosomal structure and biogenesis		essential gene	essential gene	Conditional	PA14_62870	1	cell division protein	PA4752	Yes
PA14_60445	PA14_RS24685	operon_2128	1	0	essential gene	C3	set1	obgE	GTPase ObgE	160.781	-1.2988	63.8739	-1.779	21.3102	-0.986869	COG0536	[S] Function unknown				Core	PA14_60445	1	NA	NA	Yes
PA14_60450	PA14_RS24690	operon_2129	1	0	non essential gene	C5	set2	rpmA	50S ribosomal protein L27	59.8417	0.345973	65.1985	0.630931	138.534	0.938027	COG0211	[J] Translation, ribosomal structure and biogenesis	essential gene			Conditional	PA14_60450, PA14_60460	2	50S ribosomal protein, 50S ribosomal protein	PA4567, PA4568	Yes
PA14_60460	PA14_RS24695	operon_2129	0	1	non essential gene	C5	set2	rplU	50S ribosomal protein L21	298.404	0.210027	298.614	0.434136	381.988	0.52578	COG0261	[J] Translation, ribosomal structure and biogenesis		essential gene			PA14_60450, PA14_60460	2	50S ribosomal protein, 50S ribosomal protein	PA4567, PA4568	Yes
PA14_49940	PA14_RS20285	operon_213	1	1	non essential gene	C5	set2		hypothetical protein	1250.7	-0.0644698	1200.09	-0.100038	1447.32	-0.0998955	COG1368	[M] Cell wall/membrane/envelope biogenesis					PA14_49940, PA14_49960	2	hypothetical protein, hypothetical protein	PA1115, PA1114	No
PA14_57810	PA14_RS23565	operon_2130	1	1	essential gene	C1	set1	murA	UDP-N-acetylglucosamine 1-carboxyvinyltransferase	16.2714	-3.40784	4.29893	-5.51259	0.829745	-3.00605	COG0766	[M] Cell wall/membrane/envelope biogenesis		essential gene	essential gene	Core	PA14_57800, PA14_57810, PA14_57820	3	ATP phosphoribosyltransferase catalytic, UDP-N-acetylglucosamine, hypothetical protein	PA4449, PA4450, PA4451	Yes
PA14_57820	PA14_RS23570	operon_2131	1	1	essential gene	C4	set2		hypothetical protein	302.742	-0.743737	221.58	-2.77097	376.013	-3.00844	COG5007	[K] Transcription		essential gene			PA14_57800, PA14_57810, PA14_57820	3	ATP phosphoribosyltransferase catalytic, UDP-N-acetylglucosamine, hypothetical protein	PA4449, PA4450, PA4451	Yes
PA14_57830	PA14_RS23575	operon_2132	1	1	essential gene	C3	set2		hypothetical protein	424.45	-1.443	377.174	-1.81209	559.611	-1.57376	COG1366	[T] Signal transduction mechanisms	essential gene	essential gene			PA14_57830, PA14_57840	2	hypothetical protein, hypothetical protein	PA4452, PA4453	No
PA14_57840	PA14_RS23580	operon_2132	1	0	non essential gene	C5	set2		hypothetical protein	45.0983	-0.444718	38.9939	-0.890616	47.957	-0.911689	COG2854	[Q] Secondary metabolites biosynthesis, transport and catabolism					PA14_57830, PA14_57840	2	hypothetical protein, hypothetical protein	PA4452, PA4453	No
PA14_34230	PA14_RS13955	operon_2133	1	1	non essential gene	C5	set2		hypothetical protein	286.513	-0.138178	307.223	-0.11044	409.249	-0.163472	COG1485	[S] Function unknown					PA14_34230	1	hypothetical protein	PA2353	No
PA14_57650	PA14_RS23505	operon_2134	1	1	non essential gene	C5	set2		hypothetical protein	289.348	0.393836	316.066	0.954309	774.408	1.16122	COG1485	[D] Cell cycle control, cell division, chromosome partitioning					PA14_57650	1	hypothetical protein	PA4438	No
PA14_58880	PA14_RS24020	operon_2135	0	0	essential gene	C4	set2		ATPase	106.653	-0.52991	83.9156	-2.21287	87.0378	-2.77838	COG1485	[S] Function unknown					PA14_58880	1	putative ATPase	PA4539	No
PA14_31850	PA14_RS13035	operon_2137	1	0	non essential gene	C5	set2		hypothetical protein	30.218	0.192939	25.6267	0.121652	33.3027	0.235137	COG0312	[S] Function unknown					PA14_31840, PA14_31850	2	hypothetical protein, hypothetical protein	PA2530, PA2529	No
PA14_58050	PA14_RS23675	operon_2138	1	1	non essential gene	C5	set2	pmbA	PmbA protein	435.997	0.111597	471.884	0.410956	891.672	0.452937	COG0312	[S] Function unknown					PA14_58050	1	PmbA protein	PA4472	No
PA14_58070	PA14_RS23685	operon_2139	1	1	non essential gene	C5	set2		hypothetical protein	489.775	-0.0888078	464.809	-0.190693	727.75	-0.220933	COG0312	[S] Function unknown					PA14_58070, PA14_58080	2	hypothetical protein, hypothetical protein	PA4474, PA4475	No
PA14_09710	PA14_RS03925	operon_214	1	1	non essential gene	C5	set2		aldehyde dehydrogenase	461.7	-0.0421572	467.135	0.0646656	905.316	0.168935	COG1012	[C] Energy production and conversion					PA14_09710, PA14_09730	2	putative aldehyde dehydrogenase, putative dihydrodipicolinate synthase	PA4189, PA4188	No
PA14_58090	PA14_RS23695	operon_2140	0	1	non essential gene	C5	set2		hypothetical protein	160.436	-0.150691	160.138	-0.230244	218.746	-0.0563718	COG3164	[S] Function unknown					PA14_58090, PA14_58100, PA14_58110	3	hypothetical protein, cytoplasmic axial filament, Maf-like protein	PA4476, PA4477, PA4478	No
PA14_58100	PA14_RS23700	operon_2140	1	1	non essential gene	C5	set2	cafA	cytoplasmic axial filament protein	775.873	0.300363	845.333	0.610111	1141.1	0.822143	COG1530	[J] Translation, ribosomal structure and biogenesis					PA14_58090, PA14_58100, PA14_58110	3	hypothetical protein, cytoplasmic axial filament, Maf-like protein	PA4476, PA4477, PA4478	No
PA14_58120	PA14_RS23710	operon_2143	1	0	non essential gene	C5	set2	mreD	rod shape-determining protein MreD	205.838	0.787659	235.467	1.04517	348.782	1.41599	COG2891	[M] Cell wall/membrane/envelope biogenesis	essential gene	essential gene	essential gene	Core	PA14_58120, PA14_58130	2	rod shape-determining protein, rod shape-determining protein	PA4479, PA4480	Yes
PA14_58130	PA14_RS23715	operon_2143	1	1	essential gene	C4	set2	mreC	rod shape-determining protein MreC	325.093	-0.39784	242.917	-1.07345	248.072	-2.25244	COG1792	[M] Cell wall/membrane/envelope biogenesis		essential gene	essential gene	Core	PA14_58120, PA14_58130	2	rod shape-determining protein, rod shape-determining protein	PA4479, PA4480	Yes
PA14_58150	PA14_RS23720	operon_2143	0	0	non essential gene	C5	set2	mreB	rod shape-determining protein MreB	127.39	0.124096	142.252	0.326965	167.822	0.616512	COG1077	[D] Cell cycle control, cell division, chromosome partitioning	essential gene		essential gene	Core	PA14_58150	1	rod shape-determining protein	PA4481	Yes
PA14_70140	PA14_RS28575	operon_215	1	1	essential gene	C4	set2		aldehyde dehydrogenase	2365.64	-0.862583	1988.16	-1.54874	2170.49	-2.43035	COG1012	[C] Energy production and conversion					PA14_70140	1	putative aldehyde dehydrogenase	PA5312	No
PA14_00230	PA14_RS00105	operon_2153	1	1	non essential gene	C5	set2		Rossmann fold nucleotide-binding protein	828.897	0.186011	905.613	0.418401	1478.34	0.499381	COG0758	[L] Replication, recombination and repair					PA14_00230	1	putative Rossmann fold	PA0021	No
PA14_00230	PA14_RS00105	operon_2153	1	1	non essential gene	C5	set2		Rossmann fold nucleotide-binding protein	828.897	0.186011	905.613	0.418401	1478.34	0.499381	COG0758	[U] Intracellular trafficking, secretion, and vesicular transport					PA14_00230	1	putative Rossmann fold	PA0021	No
PA14_09080	PA14_RS03690	operon_2154	1	0	non essential gene	C5	set2	rpsM	30S ribosomal protein S13	2.24041	2.23192	1.46869	-0.931421	1.41215	1.28775	COG0099	[J] Translation, ribosomal structure and biogenesis	essential gene	essential gene	essential gene	Core	PA14_09080, PA14_09090, PA14_09100, PA14_09115, PA14_09130	5	Ribosomal protein operon	PA4241, PA4240, PA4239, PA4238, PA4237	Yes
PA14_09090	PA14_RS03695	operon_2154	1	1	essential gene	C3	set1	rpsK	30S ribosomal protein S11	58.2928	-3.49385	26.3707	-3.88679	8.75606	-3.10438	COG0100	[J] Translation, ribosomal structure and biogenesis	essential gene	essential gene	essential gene	Core	PA14_09080, PA14_09090, PA14_09100, PA14_09115, PA14_09130	5	Ribosomal protein operon	PA4241, PA4240, PA4239, PA4238, PA4237	Yes
PA14_09100	PA14_RS03700	operon_2154	1	0	non essential gene	C5	set2	rpsD	30S ribosomal protein S4	94.3335	0.0098122	85.7614	0.284587	130.899	0.523631	COG0522	[J] Translation, ribosomal structure and biogenesis		essential gene	essential gene	Core	PA14_09080, PA14_09090, PA14_09100, PA14_09115, PA14_09130	5	Ribosomal protein operon	PA4241, PA4240, PA4239, PA4238, PA4237	Yes
PA14_09115	PA14_RS03705	operon_2154	0	1	non essential gene	C5	set2	rpoA	DNA-directed RNA polymerase subunit alpha	141.905	-0.079055	153.253	0.0478149	353.396	-0.0174675	COG0202	[K] Transcription		essential gene	essential gene	Core	PA14_09080, PA14_09090, PA14_09100, PA14_09115, PA14_09130	5	Ribosomal protein operon	PA4241, PA4240, PA4239, PA4238, PA4237	Yes
PA14_09130	PA14_RS03710	operon_2154	1	0	non essential gene	C5	set2	rplQ	50S ribosomal protein L17	21.7643	0.354318	30.1381	0.46849	31.2233	0.828787	COG0203	[J] Translation, ribosomal structure and biogenesis	essential gene		essential gene	Core	PA14_09080, PA14_09090, PA14_09100, PA14_09115, PA14_09130	5	Ribosomal protein operon	PA4241, PA4240, PA4239, PA4238, PA4237	Yes
PA14_09070	PA14_RS03685	operon_2155	0	0	non essential gene	C5	set2	rpmJ	50S ribosomal protein L36	54.1342	-0.443238	50.0634	-0.81599	83.5075	-0.492146	COG0257	[J] Translation, ribosomal structure and biogenesis	essential gene	essential gene			PA14_09010, PA14_09020, PA14_09030, PA14_09040, PA14_09050, PA14_09070	6	Ribosomal protein operon	PA4247, PA4246, PA4245, PA4244, PA4243, NA	Yes
PA14_09160	PA14_RS03720	operon_2157	1	0	non essential gene	C5	set2	bfrA	bacterioferritin	85.7883	0.318757	85.6141	-0.159452	102.486	-0.127334	COG2193	[P] Inorganic ion transport and metabolism					PA14_09160	1	bacterioferritin	PA4235	No
PA14_18670	PA14_RS07480	operon_2158	1	1	non essential gene	C5	set2	bfrB	bacterioferritin	218.461	-0.234605	226.799	-0.116492	393.037	-0.122369	COG2193	[P] Inorganic ion transport and metabolism					PA14_18670	1	bacterioferritin	PA3531	No
PA14_64520	PA14_RS26370	operon_2159	1	1	non essential gene	C5	set2		bacterioferritin	3912.68	-0.0665877	3855.88	-0.0412531	4880.1	-0.0552074	COG2193	[P] Inorganic ion transport and metabolism					PA14_64520	1	putative bacterioferritin	PA4880	No
PA14_70950	PA14_RS28900	operon_216	1	1	non essential gene	C5	set2	betB	betaine aldehyde dehydrogenase	617.308	0.0517314	536.676	-0.135454	615.531	0.126537	COG1012	[C] Energy production and conversion					PA14_70950, PA14_70970	2	betaine aldehyde dehydrogenase, transcriptional regulator BetI	PA5373, PA5374	No
PA14_18680	PA14_RS07485	operon_2160	1	1	non essential gene	C5	set2		hypothetical protein	2938.08	-0.10002	2876.06	-0.143672	3277.72	-0.07449	COG2906	[P] Inorganic ion transport and metabolism					PA14_18680	1	hypothetical protein	PA3530	No
PA14_08680	PA14_RS03505	operon_2161	1	1	essential gene	C1	set1	tufB	elongation factor Tu	244.167	-2.03712	117.694	-3.30658	69.7631	-4.39795	COG0050	[J] Translation, ribosomal structure and biogenesis					PA14_08680	1	NA	NA	No
PA14_08830	PA14_RS03505	operon_2161	1	0	non essential gene	C5	set2	tufA	elongation factor Tu	171.359	0.141994	161.247	0.0977823	198.359	0.442204	COG0050	[J] Translation, ribosomal structure and biogenesis		essential gene			PA14_08830	1	elongation factor Tu	PA4277	No
PA14_63530	PA14_RS25990	operon_2162	1	1	non essential gene	C5	set2	selB	selenocysteine-specific elongation factor	474.212	-0.526032	416.53	-0.92556	500.51	-0.973531	COG3276	[J] Translation, ribosomal structure and biogenesis		essential gene			PA14_63530, PA14_63540, PA14_63550	3	selenocysteine-specific elongation factor, selenocysteine synthase, formate dehydrogenase accessory	PA4807, PA4808, PA4809	No
PA14_08790	PA14_RS03555	operon_2163	1	0	non essential gene	C5	set2	rpsL	30S ribosomal protein S12	6.90568	0.0479684	9.26481	0.560977	19.5046	0.211029	COG0048	[J] Translation, ribosomal structure and biogenesis		essential gene	essential gene	Core	PA14_08790, PA14_08810, PA14_08820	3	30S ribosomal protein, 30S ribosomal protein, elongation factor G	PA4268, PA4267, PA4266	Yes
PA14_08810	PA14_RS03560	operon_2163	0	0	non essential gene	C5	set2	rpsG	30S ribosomal protein S7	106.402	-0.0222504	121.69	0.207606	150.132	0.48079	COG0049	[J] Translation, ribosomal structure and biogenesis	essential gene	essential gene	essential gene	Core	PA14_08790, PA14_08810, PA14_08820	3	30S ribosomal protein, 30S ribosomal protein, elongation factor G	PA4268, PA4267, PA4266	Yes
PA14_08380	PA14_RS03370	operon_2165	1	1	non essential gene	C5	set2		hypothetical protein	343.654	0.473186	391.995	0.571923	518.272	0.696929	COG1765	[O] Posttranslational modification, protein turnover, chaperones					PA14_08380	1	hypothetical protein	PA0653	No
PA14_22450	PA14_RS09085	operon_2166	1	1	non essential gene	C5	set2	ppiA	peptidyl-prolyl cis-trans isomerase A	98.8658	0.0569416	82.848	-0.284861	188.307	-0.616396	COG0652	[M] Cell wall/membrane/envelope biogenesis					PA14_22440, PA14_22450	2	putative ATP-binding/permease fusion, peptidyl-prolyl cis-trans isomerase	PA3228, PA3227	No
PA14_57670	PA14_RS23510	operon_2168	1	1	non essential gene	C5	set2	trpS	tryptophanyl-tRNA synthetase	124.2	-0.17367	117.496	0.037997	204.522	0.28064	COG0180	[J] Translation, ribosomal structure and biogenesis			essential gene	Core	PA14_57670	1	tryptophanyl-tRNA synthetase	PA4439	Yes
PA14_64180	PA14_RS26225	operon_217	1	0	essential gene	C1	set2		hypothetical protein	43.9132	-2.33583	39.3338	-4.03501	39.756	-5.02948	COG0042	[J] Translation, ribosomal structure and biogenesis					PA14_64180, PA14_64190, PA14_64200, PA14_64220	4	hypothetical protein, DNA-binding protein Fis, bifunctional, phosphoribosylamine--glycine ligase	PA4852, PA4853, PA4854, PA4855	Yes
PA14_02840	PA14_RS01140	operon_2170	1	1	non essential gene	C5	set2	pcaD	beta-ketoadipate enol-lactone hydrolase	444.017	-0.334573	410.854	-0.521243	559.204	-0.777944	COG0596	[S] Function unknown					PA14_02830, PA14_02840, PA14_02850	3	3-carboxy-cis,cis-muconate cycloisomerase, beta-ketoadipate enol-lactone hydrolase, gamma-carboxymuconolactone decarboxylase	PA0230, PA0231, PA0232	No
PA14_06270	PA14_RS02525	operon_2171	1	1	non essential gene	C5	set2		hydrolase	1357.47	-0.138884	1374.25	-0.0801637	2406.76	-0.157244	COG0596	[S] Function unknown					PA14_06270, PA14_06280	2	putative hydrolase, hypothetical protein	PA0480, PA0481	No
PA14_06530	PA14_RS02625	operon_2172	1	1	non essential gene	C5	set2		biotin biosynthesis protein bioH	7665.14	-0.126851	7745.4	-0.0606927	9052.04	-0.121556	COG1073	[S] Function unknown					PA14_06530, PA14_06540, PA14_06570	3	putative biotin biosynthesis, putative biotin synthesis, ion of dethiobiotin	PA0502, PA0503, PA0504	Yes
PA14_10240	PA14_RS04140	operon_2173	1	1	non essential gene	C5	set2		branched-chain alpha-keto acid dehydrogenase subunit E2	280.827	0.0726497	297.749	0.150609	351.905	-0.0536592	COG0508	[C] Energy production and conversion					PA14_10230, PA14_10240, PA14_10250, PA14_10260, PA14_10270, PA14_10280	6	2,3-butanediol dehydrogenase, branched-chain alpha-keto acid, acetoin catabolism protein, putative dehydrogenase E1, hypothetical protein, putative short-chain dehydrogenase	PA4153, PA4152, PA4151, PA4150, PA4149, PA4148	No
PA14_12150	PA14_RS04920	operon_2174	0	1	non essential gene	C5	set2		epoxide hydrolase	390.134	0.0761547	391.191	-0.0393651	861.912	-0.254182	COG2267	[I] Lipid transport and metabolism					PA14_12150	1	epoxide hydrolase	PA3994	No
PA14_19710	PA14_RS07900	operon_2175	1	1	non essential gene	C5	set2		alpha/beta hydrolase	24597.8	-0.153116	23489.6	-0.044828	30309.3	-0.219354	COG0596	[S] Function unknown					PA14_19700, PA14_19710, PA14_19720	3	aldolase II superfamily, alpha/beta family hydrolase, hypothetical protein	PA3430, PA3429, PA3428	No
PA14_22460	PA14_RS09090	operon_2176	1	0	non essential gene	C5	set2		alpha/beta hydrolase	88.1863	0.0443942	89.2635	0.0984064	136.817	-0.204222	COG0596	[S] Function unknown					PA14_22460, PA14_22470	2	alpha/beta family hydrolase, LysR family transcriptional	PA3226, PA3225	No
PA14_29020	PA14_RS11825	operon_2177	1	1	non essential gene	C5	set2	cpo	chloroperoxidase	1611.82	-0.182759	1573.47	-0.220445	1916.19	-0.243527	COG2267	[I] Lipid transport and metabolism					PA14_29020	1	chloroperoxidase precursor	PA2717	No
PA14_23800	PA14_RS09645	operon_2181	1	1	non essential gene	C5	set2	asd	aspartate-semialdehyde dehydrogenase	2884.92	0.0151252	2765.57	-0.131418	3204.34	-0.0967171	COG0136	[E] Amino acid transport and metabolism	essential gene	essential gene	essential gene	Core	PA14_23800	1	aspartate-semialdehyde dehydrogenase	PA3117	Yes
PA14_23810	PA14_RS09650	operon_2182	1	1	non essential gene	C5	set2		aspartate-semialdehyde dehydrogenase	341.805	-0.0278151	357.828	-0.0425387	547.811	0.0457278	COG0136	[E] Amino acid transport and metabolism					PA14_23810	1	aspartate-semialdehyde dehydrogenase	PA3116	No
PA14_34660	PA14_RS14100	operon_2183	1	1	non essential gene	C5	set2	gntR	transcriptional regulator GntR	585.576	0.0648821	589.188	-0.177874	1264.68	-0.228566	COG1609	[K] Transcription					PA14_34660	1	transcriptional regulator GntR	PA2320	No
PA14_20580	PA14_RS08265	operon_2184	0	1	non essential gene	C5	set2	amiC	aliphatic amidase expression-regulating protein	756.85	-0.00847258	736.623	-0.0222384	829.517	-0.0775452	COG0683	[E] Amino acid transport and metabolism					PA14_20560, PA14_20570, PA14_20580, PA14_20590	4	acylamide amidohydrolase, putative chaperone, aliphatic amidase expression-regulating, aliphatic amidase regulator	PA3366, PA3365, PA3364, PA3363	No
PA14_64270	PA14_RS26255	operon_2185	1	1	non essential gene	C5	set2		hypothetical protein	353.246	0.156986	381.755	0.215815	852.826	0.43302	COG0683	[E] Amino acid transport and metabolism					PA14_64270	1	hypothetical protein	PA4858	No
PA14_44270	PA14_RS17980	operon_2189	0	1	essential gene	C4	set2		sulfur transfer protein SirA	1095.43	-0.340677	865.566	-0.87739	1023	-1.5585	COG0425	[O] Posttranslational modification, protein turnover, chaperones	essential gene	essential gene			PA14_44270	1	sulfur transfer protein	PA1564	No
PA14_08340	PA14_RS03350	operon_219	1	1	non essential gene	C5	set2	trpG	anthranilate synthase component II	710.555	0.0670948	701.118	0.112087	882.717	0.186389	COG0512	[E] Amino acid transport and metabolism					PA14_08340, PA14_08350, PA14_08360	3	anthranilate synthase component, anthranilate phosphoribosyltransferase, indole-3-glycerol-phosphate synthase	PA0649, PA0650, PA0651	Yes
PA14_08340	PA14_RS03350	operon_219	1	1	non essential gene	C5	set2	trpG	anthranilate synthase component II	710.555	0.0670948	701.118	0.112087	882.717	0.186389	COG0512	[H] Coenzyme transport and metabolism					PA14_08340, PA14_08350, PA14_08360	3	anthranilate synthase component, anthranilate phosphoribosyltransferase, indole-3-glycerol-phosphate synthase	PA0649, PA0650, PA0651	Yes
PA14_51310	PA14_RS20860	operon_2190	1	1	non essential gene	C5	set2		hypothetical protein	488.831	0.124651	525.036	0.352366	1125.17	0.45288	COG0425	[O] Posttranslational modification, protein turnover, chaperones					PA14_51300, PA14_51310	2	hypothetical protein, hypothetical protein	PA1007, PA1006	No
PA14_07280	PA14_RS02915	operon_2192	1	1	non essential gene	C5	set2		hypothetical protein	338.466	0.0455137	349.952	0.197462	468.682	0.142506	COG2081	[S] Function unknown					PA14_07280	1	hypothetical protein	PA0559	No
PA14_12770	PA14_RS05150	operon_2193	1	1	non essential gene	C5	set2		hypothetical protein	505.438	-0.100981	491.321	-0.0544789	586.118	-0.180294	COG2081	[S] Function unknown					PA14_12770	1	hypothetical protein	PA3949	No
PA14_64510	PA14_RS26365	operon_2194	0	1	non essential gene	C5	set2		hypothetical protein	5005.73	0.042783	5031.34	0.0873507	6062.6	0.127394	COG2982	[M] Cell wall/membrane/envelope biogenesis					PA14_64510	1	hypothetical protein	PA4879	No
PA14_21210	PA14_RS08535	operon_2197	1	1	non essential gene	C5	set2		hypothetical protein	443.331	0.497832	537.406	0.644649	733.908	0.962076	COG2194	[S] Function unknown					PA14_21210	1	hypothetical protein	PA3310	No
PA14_39020	PA14_RS15840	operon_2198	1	1	non essential gene	C5	set2	eptA	lipid A phosphoethanolamine transferase, EptA	837.287	0.0528619	834.426	0.0109093	2047.63	0.0264151	COG2194	[S] Function unknown					PA14_39020	1	hypothetical protein	PA1972	No
PA14_51090	PA14_RS20760	operon_22	1	1	non essential gene	C5	set2		short-chain dehydrogenase	336.507	-0.282589	315.837	-0.288185	378.913	-0.04425	COG1028	[I] Lipid transport and metabolism					PA14_51070, PA14_51080, PA14_51090, PA14_51100, PA14_51110, PA14_51120	6	porin, putative dioxygenase, putative short-chain dehydrogenase, acyl-CoA dehydrogenase, enoyl-CoA hydratase/isomerase, acyl-CoA dehydrogenase	PA1025, PA1024, PA1023, PA1022, PA1021, PA1020	No
PA14_51090	PA14_RS20760	operon_22	1	1	non essential gene	C5	set2		short-chain dehydrogenase	336.507	-0.282589	315.837	-0.288185	378.913	-0.04425	COG1028	[Q] Secondary metabolites biosynthesis, transport and catabolism					PA14_51070, PA14_51080, PA14_51090, PA14_51100, PA14_51110, PA14_51120	6	porin, putative dioxygenase, putative short-chain dehydrogenase, acyl-CoA dehydrogenase, enoyl-CoA hydratase/isomerase, acyl-CoA dehydrogenase	PA1025, PA1024, PA1023, PA1022, PA1021, PA1020	No
PA14_51350	PA14_RS20880	operon_220	1	1	non essential gene	C5	set2	phnB	anthranilate synthase component II	803.624	-0.0566369	851.114	0.0415706	999.541	0.0983838	COG0512	[E] Amino acid transport and metabolism					PA14_51350, PA14_51360	2	anthranilate synthase component, anthranilate synthase component	PA1002, PA1001	No
PA14_51350	PA14_RS20880	operon_220	1	1	non essential gene	C5	set2	phnB	anthranilate synthase component II	803.624	-0.0566369	851.114	0.0415706	999.541	0.0983838	COG0512	[H] Coenzyme transport and metabolism					PA14_51350, PA14_51360	2	anthranilate synthase component, anthranilate synthase component	PA1002, PA1001	No
PA14_00100	PA14_RS00045	operon_2202	1	0	essential gene	C1	set1	glyQ	glycyl-tRNA synthetase subunit alpha	1251.03	-2.52275	757.974	-6.61769	517.998	-10.8871	COG0752	[J] Translation, ribosomal structure and biogenesis	essential gene		essential gene	Core	PA14_00090, PA14_00100	2	glycyl-tRNA synthetase subunit, glycyl-tRNA synthetase subunit	PA0008, PA0009	Yes
PA14_63540	PA14_RS25995	operon_2210	1	1	non essential gene	C5	set2	selA	selenocysteine synthase	200.285	-0.103911	179.359	-0.0621269	334.175	-0.296408	COG1921	[E] Amino acid transport and metabolism					PA14_63530, PA14_63540, PA14_63550	3	selenocysteine-specific elongation factor, selenocysteine synthase, formate dehydrogenase accessory	PA4807, PA4808, PA4809	No
PA14_06120	PA14_RS02460	operon_2211	1	1	non essential gene	C5	set2		hypothetical protein	3165.86	-0.0930384	3206.74	-0.0982194	3685.48	-0.139388	COG0625	[O] Posttranslational modification, protein turnover, chaperones					PA14_06120, PA14_06130	2	hypothetical protein, hypothetical protein	PA0467, PA0468	No
PA14_14290	PA14_RS05705	operon_2212	1	0	non essential gene	C5	set2		hypothetical protein	82.42	-0.0511909	79.1119	0.172039	97.0762	-0.119789	COG0625	[O] Posttranslational modification, protein turnover, chaperones					PA14_14290	1	hypothetical protein	PA3844	No
PA14_14700	PA14_RS05865	operon_2213	1	1	non essential gene	C5	set2	cysE	serine O-acetyltransferase	167.197	0.389951	170.614	0.38783	408.965	0.474138	COG1045	[E] Amino acid transport and metabolism					PA14_14690, PA14_14700	2	putative methyltransferase, serine O-acetyltransferase	PA3817, PA3816	No
PA14_07690	PA14_RS03075	operon_2215	1	1	essential gene	C4	set2	glpE	thiosulfate sulfurtransferase	268.345	-0.227645	214.081	-0.949124	375.618	-1.67627	COG0607	[P] Inorganic ion transport and metabolism					PA14_07690	1	thiosulfate sulfurtransferase	PA0589	No
PA14_30430	PA14_RS12410	operon_2216	1	1	essential gene	C4	set2		thiosulfate sulfurtransferase	1450.52	-0.383559	1165.37	-0.983914	1181.5	-2.10285	COG0607	[P] Inorganic ion transport and metabolism					PA14_30430, PA14_30440	2	thiosulfate sulfurtransferase, putative enzyme	PA2603, PA2602	No
PA14_67750	PA14_RS27630	operon_2217	0	1	essential gene	C3	set1		rhodanese-like domain-containing protein	38.9646	-1.66146	19.2461	-3.84142	11.6936	-3.93704	COG0607	[P] Inorganic ion transport and metabolism					PA14_67740, PA14_67750	2	glutaredoxin, rhodanese-like domain-containing protein	PA5129, PA5130	No
PA14_04670	PA14_RS01895	operon_2219	0	0	non essential gene	C5	set2	mutM	formamidopyrimidine-DNA glycosylase	47.2739	-0.00129984	42.3549	-0.0701899	48.8114	-0.459864	COG0266	[L] Replication, recombination and repair					PA14_04670, PA14_04680	2	formamidopyrimidine-DNA glycosylase, hypothetical protein	PA0357, PA0358	No
PA14_70180	PA14_RS28590	operon_2220	0	0	non essential gene	C5	set2	rpmG	50S ribosomal protein L33	10.6598	0.695921	11.0596	-0.290093	20.6813	0.345773	COG0267	[J] Translation, ribosomal structure and biogenesis					PA14_70180, PA14_70190	2	50S ribosomal protein, 50S ribosomal protein	PA5315, PA5316	Yes
PA14_70190	PA14_RS28595	operon_2220	0	0	non essential gene	C5	set2	rpmB	50S ribosomal protein L28	34.9461	0.539546	34.3029	0.525223	37.8418	0.312526	COG0227	[J] Translation, ribosomal structure and biogenesis	essential gene	essential gene		Conditional	PA14_70180, PA14_70190	2	50S ribosomal protein, 50S ribosomal protein	PA5315, PA5316	Yes
PA14_44660	PA14_RS18160	operon_2221	1	1	essential gene	C2	set1	ligA	NAD-dependent DNA ligase LigA	268.791	-0.818839	114.139	-4.00174	54.1728	-9.04728	COG0272	[L] Replication, recombination and repair	essential gene		essential gene	Core	PA14_44660	1	NA	NA	Yes
PA14_23160	PA14_RS09375	operon_2222	1	1	non essential gene	C5	set2	gltS	sodium/glutamate symporter	156.289	0.0782394	137.491	-0.0745631	341.604	0.0155438	COG0786	[E] Amino acid transport and metabolism					PA14_23160, PA14_23170, PA14_23190	3	sodium/glutamate symporter, formimidoylglutamase, putative transcriptional regulator	PA3176, PA3175, PA3174	No
PA14_44190	PA14_RS17955	operon_2228	0	1	non essential gene	C5	set2		sugar MFS transporter	345.111	-0.0744859	344.197	-0.00062336	437.404	0.0910503	COG2271	[G] Carbohydrate transport and metabolism					PA14_44190, PA14_44200, PA14_44210	3	putative sugar MFS, hypothetical protein, putative glycine/D-amino acid	PA1569, PA1568, PA1567	No
PA14_49610	PA14_RS20140	operon_2229	1	0	non essential gene	C5	set2		MFS family transporter	108.33	-0.10365	115.661	-0.119377	136.413	0.0165517	COG2271	[G] Carbohydrate transport and metabolism					PA14_49610, PA14_49620	2	MFS family transporter, phosphoserine phosphatase	PA1144, PA1143	No
PA14_69130	PA14_RS28180	operon_2230	1	1	non essential gene	C5	set2	glpT	sn-glycerol-3-phosphate transporter	777.239	-0.0713646	743.956	-0.116898	1834.83	-0.207555	COG2271	[G] Carbohydrate transport and metabolism					PA14_69130	1	sn-glycerol-3-phosphate transporter	PA5235	No
PA14_23680	PA14_RS09600	operon_2231	1	0	non essential gene	C5	set2	ibpA	heat-shock protein IbpA	55.7451	0.0384651	54.3759	-0.23864	156.953	0.00806045	COG0071	[O] Posttranslational modification, protein turnover, chaperones					PA14_23680	1	heat-shock protein IbpA	PA3126	No
PA14_00050	PA14_RS00020	operon_2232	1	0	essential gene	C4	set1	gyrB	DNA gyrase subunit B	11279.1	-0.932457	6129.07	-1.58598	2830.44	-1.70945	COG0187	[L] Replication, recombination and repair		essential gene	essential gene	Core	PA14_00050	1	DNA gyrase subunit	PA0004	Yes
PA14_65660	PA14_RS26815	operon_2233	0	0	essential gene	C4	set1	parE	DNA topoisomerase IV subunit B	350.199	-0.174608	173.928	-0.960779	66.9921	-1.3218	COG0187	[L] Replication, recombination and repair	essential gene	essential gene	essential gene	Core	PA14_65590, PA14_65605, PA14_65630, PA14_65640, PA14_65660	5	hypothetical protein, DNA topoisomerase IV, hypothetical protein, hypothetical protein, DNA topoisomerase IV	PA4963, PA4964, PA4965, PA4966, PA4967	Yes
PA14_73230	PA14_RS29810	operon_2237	0	1	non essential gene	C5	set2	atpC	F0F1 ATP synthase subunit epsilon	198.537	0.0929482	226.905	0.482736	287.065	0.49705	COG0355	[C] Energy production and conversion		essential gene			PA14_73230, PA14_73240, PA14_73250, PA14_73260, PA14_73280, PA14_73290, PA14_73300	7	F0F1 ATP synthase, F0F1 ATP synthase, F0F1 ATP synthase, F0F1 ATP synthase, F0F1 ATP synthase, F0F1 ATP synthase, F0F1 ATP synthase	PA5553, PA5554, PA5555, PA5556, PA5557, PA5558, PA5559	Yes
PA14_73240	PA14_RS29815	operon_2237	0	0	essential gene	C1	set1	atpD	F0F1 ATP synthase subunit beta	7.69664	-3.17339	1.67399	-4.14916	0.561745	-2.45679	COG0055	[C] Energy production and conversion		essential gene	essential gene	Core	PA14_73230, PA14_73240, PA14_73250, PA14_73260, PA14_73280, PA14_73290, PA14_73300	7	F0F1 ATP synthase, F0F1 ATP synthase, F0F1 ATP synthase, F0F1 ATP synthase, F0F1 ATP synthase, F0F1 ATP synthase, F0F1 ATP synthase	PA5553, PA5554, PA5555, PA5556, PA5557, PA5558, PA5559	Yes
PA14_73250	PA14_RS29820	operon_2237	1	0	essential gene	C2	set2	atpG	F0F1 ATP synthase subunit gamma	18.6865	-0.470687	12.4687	-2.89221	15.557	-4.39564	COG0224	[C] Energy production and conversion		essential gene	essential gene	Core	PA14_73230, PA14_73240, PA14_73250, PA14_73260, PA14_73280, PA14_73290, PA14_73300	7	F0F1 ATP synthase, F0F1 ATP synthase, F0F1 ATP synthase, F0F1 ATP synthase, F0F1 ATP synthase, F0F1 ATP synthase, F0F1 ATP synthase	PA5553, PA5554, PA5555, PA5556, PA5557, PA5558, PA5559	Yes
PA14_73260	PA14_RS29825	operon_2237	1	0	essential gene	C3	set1	atpA	F0F1 ATP synthase subunit alpha	1027.35	-1.47275	451.502	-2.43436	198.222	-2.30052	COG0056	[C] Energy production and conversion	essential gene	essential gene	essential gene	Core	PA14_73230, PA14_73240, PA14_73250, PA14_73260, PA14_73280, PA14_73290, PA14_73300	7	F0F1 ATP synthase, F0F1 ATP synthase, F0F1 ATP synthase, F0F1 ATP synthase, F0F1 ATP synthase, F0F1 ATP synthase, F0F1 ATP synthase	PA5553, PA5554, PA5555, PA5556, PA5557, PA5558, PA5559	Yes
PA14_73280	PA14_RS29830	operon_2237	1	1	essential gene	C4	set1	atpH	F0F1 ATP synthase subunit delta	2914.94	-0.52033	1773.5	-1.31876	599.159	-2.06018	COG0712	[C] Energy production and conversion		essential gene	essential gene	Core	PA14_73230, PA14_73240, PA14_73250, PA14_73260, PA14_73280, PA14_73290, PA14_73300	7	F0F1 ATP synthase, F0F1 ATP synthase, F0F1 ATP synthase, F0F1 ATP synthase, F0F1 ATP synthase, F0F1 ATP synthase, F0F1 ATP synthase	PA5553, PA5554, PA5555, PA5556, PA5557, PA5558, PA5559	Yes
PA14_73290	PA14_RS29835	operon_2237	1	1	non essential gene	C5	set2	atpF	F0F1 ATP synthase subunit B	415.641	0.0591122	437.337	0.153118	556.15	0.23515	COG0711	[C] Energy production and conversion		essential gene			PA14_73230, PA14_73240, PA14_73250, PA14_73260, PA14_73280, PA14_73290, PA14_73300	7	F0F1 ATP synthase, F0F1 ATP synthase, F0F1 ATP synthase, F0F1 ATP synthase, F0F1 ATP synthase, F0F1 ATP synthase, F0F1 ATP synthase	PA5553, PA5554, PA5555, PA5556, PA5557, PA5558, PA5559	Yes
PA14_73300	PA14_RS29840	operon_2237	0	0	non essential gene	C5	set2	atpE	F0F1 ATP synthase subunit C	169.065	0.068539	168.919	0.29711	215.028	0.549525	COG0636	[C] Energy production and conversion	essential gene	essential gene			PA14_73230, PA14_73240, PA14_73250, PA14_73260, PA14_73280, PA14_73290, PA14_73300	7	F0F1 ATP synthase, F0F1 ATP synthase, F0F1 ATP synthase, F0F1 ATP synthase, F0F1 ATP synthase, F0F1 ATP synthase, F0F1 ATP synthase	PA5553, PA5554, PA5555, PA5556, PA5557, PA5558, PA5559	Yes
PA14_73310	PA14_RS29845	operon_2237	0	1	essential gene	C1	set1	atpB	F0F1 ATP synthase subunit A	22.9964	-3.85571	9.12576	-6.61305	3.57491	-5.12851	COG0356	[C] Energy production and conversion		essential gene	essential gene	Core	PA14_73310	1	F0F1 ATP synthase	PA5560	Yes
PA14_73320	PA14_RS29850	operon_2237	1	1	non essential gene	C5	set2	atpI	F0F1 ATP synthase subunit I	197.579	-0.723942	180.871	-0.496793	231.81	0.0352079	COG3312	[C] Energy production and conversion		essential gene	essential gene	Conditional	PA14_73320	1	F0F1 ATP synthase	PA5561	Yes
PA14_30770	PA14_RS12555	operon_2239	1	1	non essential gene	C5	set2		AsnC family transcriptional regulator	218.329	0.0557322	210.41	0.0521926	347.464	0.110187	COG1522	[K] Transcription	essential gene				PA14_30760, PA14_30770	2	putative acetyltransferase, AsnC family transcriptional	PA2578, PA2577	No
PA14_66610	PA14_RS27180	operon_224	1	1	essential gene	C4	set2	aroK	shikimate kinase	1325.58	-0.419881	1123.14	-0.907137	1273.59	-1.13337	COG0703	[F] Nucleotide transport and metabolism	essential gene		essential gene	Conditional	PA14_66610, PA14_66620, PA14_66630, PA14_66640, PA14_66650, PA14_66660	6	shikimate kinase, type 4 fimbrial, type 4 fimbrial, type 4 fimbrial, type 4 fimbrial, type 4 fimbrial	PA5039, PA5040, PA5041, PA5042, PA5043, PA5044	Yes
PA14_35540	PA14_RS14455	operon_2240	1	1	non essential gene	C5	set2	bkdR	transcriptional regulator BkdR	586.244	-0.0634359	543.208	-0.117375	606.624	-0.376083	COG1522	[K] Transcription					PA14_35540	1	transcriptional regulator BkdR	PA2246	No
PA14_37580	PA14_RS15290	operon_2241	1	1	non essential gene	C5	set2		leucine-responsive regulatory protein	282.255	-0.00802469	311.304	0.0981768	394.597	0.223847	COG1522	[K] Transcription					PA14_37580	1	putative leucine-responsive regulatory	PA2082	No
PA14_38300	PA14_RS15560	operon_2242	1	1	non essential gene	C5	set2		transcriptional regulator	871.059	-0.111027	843.07	-0.00133358	1833.14	-0.0678868	COG1522	[K] Transcription					PA14_38290, PA14_38300	2	hypothetical protein, putative transcriptional regulator	PA2029, PA2028	No
PA14_58510	PA14_RS23855	operon_2243	1	1	non essential gene	C5	set2		AsnC family transcriptional regulator	1225.58	-0.0346941	1198.14	0.114979	2947.04	0.115526	COG1522	[K] Transcription					PA14_58510	1	AsnC family transcriptional	PA4508	No
PA14_63240	PA14_RS25865	operon_2244	1	1	non essential gene	C5	set2		transcriptional regulator	133.702	-0.0185314	132.995	0.236802	336.634	0.0730641	COG1522	[K] Transcription					PA14_63240	1	putative transcriptional regulator	PA4784	No
PA14_69840	PA14_RS28465	operon_2245	1	1	non essential gene	C5	set2		magnesium chelatase	801.571	0.0459923	786.265	0.0308089	950.954	-0.00664979	COG0606	[O] Posttranslational modification, protein turnover, chaperones					PA14_69840	1	putative magnesium chelatase	PA5290	No
PA14_38700	PA14_RS15720	operon_2247	1	1	non essential gene	C5	set2	ppiC1	peptidyl-prolyl cis-trans isomerase C1	173.706	-0.196866	164.714	-0.204614	311.467	-0.445817	COG0760	[O] Posttranslational modification, protein turnover, chaperones					PA14_38700	1	peptidyl-prolyl cis-trans isomerase	PA1996	No
PA14_69430	PA14_RS28300	operon_2248	1	1	non essential gene	C5	set2		hypothetical protein	483.013	-0.112886	433.632	-0.03484	495.993	-0.0705034	COG2959	[H] Coenzyme transport and metabolism					PA14_69420, PA14_69430	2	putative enzyme of, hypothetical protein	PA5257, PA5258	No
PA14_69640	PA14_RS28390	operon_2249	0	1	non essential gene	C5	set2	cyaY	frataxin-like protein	1019.99	-0.0758168	1007.14	-0.257312	1171.01	-0.404544	COG1965	[P] Inorganic ion transport and metabolism					PA14_69640	1	frataxin-like protein	PA5275	No
PA14_11680	PA14_RS04730	operon_225	1	1	non essential gene	C5	set2		two-component regulator	473.955	-0.113713	456.967	-0.0506964	563.504	-0.233076	COG0745	[T] Signal transduction mechanisms					PA14_11680	1	two-component regulator	PA4032	No
PA14_13000	PA14_RS05235	operon_226	1	1	non essential gene	C5	set2		transcriptional regulator	927.409	-0.139	956.308	-0.0114405	2140.84	0.042941	COG1221	[K] Transcription					PA14_13000, PA14_13010	2	transcriptional regulator, hypothetical protein	PA3932, PA3931	No
PA14_13000	PA14_RS05235	operon_226	1	1	non essential gene	C5	set2		transcriptional regulator	927.409	-0.139	956.308	-0.0114405	2140.84	0.042941	COG1221	[T] Signal transduction mechanisms					PA14_13000, PA14_13010	2	transcriptional regulator, hypothetical protein	PA3932, PA3931	No
PA14_25080	PA14_RS10170	operon_2261	1	1	non essential gene	C5	set2	fadB	multifunctional fatty acid oxidation complex subunit alpha	182.536	-0.150346	171.565	-0.214425	342.399	-0.373653	COG1024	[I] Lipid transport and metabolism		essential gene	essential gene	Conditional	PA14_25080, PA14_25090	2	NA, NA	NA, NA	Yes
PA14_42080	PA14_RS17075	operon_2262	1	1	non essential gene	C5	set2		3-hydroxyacyl-CoA dehydrogenase	608.915	0.204121	599.209	0.0829303	714.344	0.0274299	COG1024	[I] Lipid transport and metabolism					PA14_42080, PA14_42090	2	putative 3-hydroxyacyl-CoA dehydrogenase,	PA1737, PA1736	No
PA14_06030	PA14_RS02425	operon_2263	1	0	non essential gene	C5	set2		acyltransferase	74.4186	0.259419	78.4635	0.34368	131.98	0.315447	COG0204	[I] Lipid transport and metabolism					PA14_06030	1	putative acyltransferase	PA0461	No
PA14_53490	PA14_RS21770	operon_2264	1	0	non essential gene	C5	set2		acyltransferase	32.0166	-0.506321	36.4587	0.0626269	78.9279	0.269621	COG0204	[I] Lipid transport and metabolism					PA14_53490	1	putative acyltransferase	PA0834	No
PA14_63550	PA14_RS26000	operon_2265	1	0	non essential gene	C5	set2	fdhE	formate dehydrogenase accessory protein FdhE	76.6474	0.873013	68.9324	0.443826	210.549	0.733213	COG3058	[O] Posttranslational modification, protein turnover, chaperones					PA14_63530, PA14_63540, PA14_63550	3	selenocysteine-specific elongation factor, selenocysteine synthase, formate dehydrogenase accessory	PA4807, PA4808, PA4809	No
PA14_62830	PA14_RS25680	operon_2267	1	0	essential gene	C4	set1	tpiA	triosephosphate isomerase	908.66	-0.750314	492.279	-1.667	276.298	-2.11259	COG0149	[G] Carbohydrate transport and metabolism		essential gene		Conditional	PA14_62810, PA14_62830	2	preprotein translocase subunit, triosephosphate isomerase	PA4747, PA4748	Yes
PA14_20140	PA14_RS08070	operon_2268	1	1	essential gene	C2	set1	fpr	ferredoxin--NADP+ reductase	291.546	-1.94471	135.568	-4.57365	82.0708	-8.92688	COG1018	[C] Energy production and conversion			essential gene	Core	PA14_20140	1	ferredoxin--NADP+ reductase	PA3397	Yes
PA14_61060	PA14_RS24945	operon_2269	1	1	non essential gene	C5	set2		oxidoreductase	427.168	0.378458	470.118	0.55782	1086.39	0.947268	COG0543	[C] Energy production and conversion					PA14_61060	1	putative oxidoreductase	PA4615	No
PA14_61060	PA14_RS24945	operon_2269	1	1	non essential gene	C5	set2		oxidoreductase	427.168	0.378458	470.118	0.55782	1086.39	0.947268	COG0543	[H] Coenzyme transport and metabolism					PA14_61060	1	putative oxidoreductase	PA4615	No
PA14_41640	PA14_RS16890	operon_2271	0	1	non essential gene	C5	set2		ribonuclease activity regulator protein RraA	640.657	0.155799	704.8	0.37916	940.538	0.473479	COG0684	[H] Coenzyme transport and metabolism					PA14_41640	1	ribonuclease activity regulator	PA1772	No
PA14_66770	PA14_RS27250	operon_2272	1	1	non essential gene	C5	set2	hslV	ATP-dependent protease peptidase subunit	190.054	0.0802841	171.824	-0.339941	354.663	-0.505671	COG5405	[O] Posttranslational modification, protein turnover, chaperones					PA14_66770	1	ATP-dependent protease peptidase	PA5053	No
PA14_66790	PA14_RS27255	operon_2272	1	0	non essential gene	C5	set2	hslU	ATP-dependent protease ATP-binding subunit HslU	83.9802	0.164188	87.2753	0.223982	192.912	0.0842552	COG1220	[O] Posttranslational modification, protein turnover, chaperones					PA14_66790	1	ATP-dependent protease ATP-binding	PA5054	No
PA14_66760	PA14_RS27245	operon_2273	1	0	essential gene	C2	set1		hypothetical protein	426.719	-0.151986	163.9	-2.09687	78.1877	-5.08148	COG3087	[D] Cell cycle control, cell division, chromosome partitioning		essential gene	essential gene	Core	PA14_66750, PA14_66760	2	arginyl-tRNA synthetase, hypothetical protein	PA5051, PA5052	Yes
PA14_66720	PA14_RS27235	operon_2275	1	1	essential gene	C4	set2	priA	primosome assembly protein PriA	307.66	-0.319596	261.048	-0.881433	388.557	-1.22874	COG1198	[L] Replication, recombination and repair	essential gene		essential gene	Conditional	PA14_66720	1	primosome assembly protein	PA5050	Yes
PA14_44150	PA14_RS17935	operon_2276	1	0	non essential gene	C5	set2		hypothetical protein	54.4226	-0.305632	51.8109	-0.188771	75.659	-0.43842	COG3738	[S] Function unknown					PA14_44150, PA14_44160	2	putative periplasmic protein, putative ATP-NAD kinase	PA1573, PA1572	No
PA14_16690	PA14_RS06690	operon_2277	1	0	non essential gene	C5	set2	ppc	phosphoenolpyruvate carboxylase	95.689	-0.0732199	94.4431	0.00676919	178.21	-0.0577418	COG2352	[C] Energy production and conversion					PA14_16690	1	phosphoenolpyruvate carboxylase	PA3687	No
PA14_62450	PA14_RS25525	operon_2278	1	1	non essential gene	C5	set2	trmA	tRNA (uracil-5-)-methyltransferase	308.31	-0.153641	281.704	0.0396196	616.36	-0.165894	COG2265	[J] Translation, ribosomal structure and biogenesis					PA14_62440, PA14_62450	2	putative transporter, tRNA (uracil-5-)-methyltransferase	PA4719, PA4720	No
PA14_69390	PA14_RS28285	operon_2279	1	0	non essential gene	C5	set2	algQ	anti-RNA polymerase sigma 70 factor	0.746313	-2.05331	0.500882	-0.277941	2.4726	1.41822	COG3160	[K] Transcription					PA14_69390	1	anti-RNA polymerase sigma	PA5255	No
PA14_29730	PA14_RS12135	operon_228	1	1	non essential gene	C5	set2	bqsR	two-component response regulator BqsR	2692.27	-0.119966	2791.23	-0.0752934	3150.25	-0.0844112	COG0745	[T] Signal transduction mechanisms					PA14_29710, PA14_29720, PA14_29730, PA14_29740	4	hypothetical protein, hypothetical protein, putative two-component response, putative two-component sensor	PA2659, PA2658, PA2657, PA2656	No
PA14_29730	PA14_RS12135	operon_228	1	1	non essential gene	C5	set2	bqsR	two-component response regulator BqsR	2692.27	-0.119966	2791.23	-0.0752934	3150.25	-0.0844112	COG0745	[K] Transcription					PA14_29710, PA14_29720, PA14_29730, PA14_29740	4	hypothetical protein, hypothetical protein, putative two-component response, putative two-component sensor	PA2659, PA2658, PA2657, PA2656	No
PA14_64200	PA14_RS26235	operon_2280	1	0	essential gene	C4	set1	purH	bifunctional phosphoribosylaminoimidazolecarboxamide formyltransferase/IMP cyclohydrolase	1608.3	-0.207884	876.872	-0.616867	466.811	-1.26345	COG0138	[F] Nucleotide transport and metabolism				Conditional	PA14_64180, PA14_64190, PA14_64200, PA14_64220	4	hypothetical protein, DNA-binding protein Fis, bifunctional, phosphoribosylamine--glycine ligase	PA4852, PA4853, PA4854, PA4855	Yes
PA14_64220	PA14_RS26240	operon_2280	1	1	non essential gene	C5	set2	purD	phosphoribosylamine--glycine ligase	835.161	-0.0499941	744.439	-0.242246	873.899	-0.597165	COG0151	[F] Nucleotide transport and metabolism				Conditional	PA14_64180, PA14_64190, PA14_64200, PA14_64220	4	hypothetical protein, DNA-binding protein Fis, bifunctional, phosphoribosylamine--glycine ligase	PA4852, PA4853, PA4854, PA4855	Yes
PA14_03080	PA14_RS01230	operon_2281	0	1	non essential gene	C5	set2		acetyltransferase	292.319	0.253919	320.665	0.581217	759.766	0.783451	COG0454	[K] Transcription					PA14_03080	1	putative acetyltransferase	PA0249	No
PA14_45980	PA14_RS18665	operon_2282	1	1	non essential gene	C5	set2		acetyltransferase	1000.42	0.153554	1108.96	0.509642	1557.76	0.656166	COG0454	[K] Transcription					PA14_45980	1	putative acetyltransferase	PA1428	No
PA14_32580	PA14_RS13285	operon_229	1	1	non essential gene	C5	set2		two-component response regulator	895.389	0.29961	973.58	0.567874	1205.56	0.704047	COG0745	[T] Signal transduction mechanisms					PA14_32570, PA14_32580	2	two-component sensor, two-component response regulator	PA2480, PA2479	No
PA14_16860	PA14_RS06760	operon_2293	1	0	non essential gene	C5	set2	plsB	glycerol-3-phosphate acyltransferase	53.6333	0.37615	57.5309	0.0320103	93.9857	0.260639	COG2937	[I] Lipid transport and metabolism					PA14_16860	1	glycerol-3-phosphate acyltransferase	PA3673	No
PA14_63020	PA14_RS25760	operon_2294	0	1	non essential gene	C5	set2	fur	ferric uptake regulation protein	206.065	0.125734	201.094	0.195442	232.571	0.318555	COG0735	[K] Transcription				Core	PA14_63020	1	ferric uptake regulation	PA4764	Yes
PA14_72560	PA14_RS29540	operon_2295	1	1	non essential gene	C5	set2	np20	transcriptional regulator np20	596.901	0.0498716	581.591	-0.00460441	1283.96	0.162622	COG0735	[P] Inorganic ion transport and metabolism					PA14_72560, PA14_72580, PA14_72590	3	transcriptional regulator np20, zinc transporter, permease of ABC	PA5499, PA5500, PA5501	No
PA14_00250	PA14_RS00115	operon_2296	1	0	non essential gene	C5	set2	qor	quinone oxidoreductase	121.363	0.240576	125.415	0.213714	152.816	0.585787	COG0604	[C] Energy production and conversion					PA14_00250	1	quinone oxidoreductase	PA0023	No
PA14_29460	PA14_RS12015	operon_2297	1	1	non essential gene	C5	set2		quinone oxidoreductase	887.44	-0.0259678	871.274	-0.179637	1051.35	-0.217402	COG0604	[C] Energy production and conversion					PA14_29440, PA14_29460	2	LysR family transcriptional, putative quinone oxidoreductase	PA2681, PA2680	No
PA14_09180	PA14_RS03725	operon_2298	0	0	non essential gene	C5	set2	uvrA	excinuclease ABC subunit A	65.3862	0.0139564	58.3207	-0.0497604	80.2641	-0.0981997	COG0178	[L] Replication, recombination and repair					PA14_09180	1	excinuclease ABC subunit	PA4234	No
PA14_54700	PA14_RS22265	operon_2299	1	1	non essential gene	C5	set2		beta-lactamase	372.009	0.0705773	358.592	0.305611	896.897	0.402998	COG2015	[Q] Secondary metabolites biosynthesis, transport and catabolism					PA14_54700	1	putative beta-lactamase	PA0740	No
PA14_63270	PA14_RS25875	operon_23	1	1	non essential gene	C5	set2	fabG	3-ketoacyl-ACP reductase	229.32	-0.12096	202.016	-0.253011	429.46	-0.272798	COG1028	[I] Lipid transport and metabolism					PA14_63270	1	3-ketoacyl-(acyl-carrier-protein) reductase	PA4786	No
PA14_63270	PA14_RS25875	operon_23	1	1	non essential gene	C5	set2	fabG	3-ketoacyl-ACP reductase	229.32	-0.12096	202.016	-0.253011	429.46	-0.272798	COG1028	[Q] Secondary metabolites biosynthesis, transport and catabolism					PA14_63270	1	3-ketoacyl-(acyl-carrier-protein) reductase	PA4786	No
PA14_34150	PA14_RS13925	operon_230	0	1	non essential gene	C5	set2	sfa3	Sfa3	422.749	0.208786	466.209	0.317744	638.671	0.572501	COG3829	[K] Transcription		essential gene			PA14_34150	1	putative transcriptional regulator	PA2359	No
PA14_34150	PA14_RS13925	operon_230	0	1	non essential gene	C5	set2	sfa3	Sfa3	422.749	0.208786	466.209	0.317744	638.671	0.572501	COG3829	[T] Signal transduction mechanisms		essential gene			PA14_34150	1	putative transcriptional regulator	PA2359	No
PA14_46720	PA14_RS18985	operon_2300	1	1	non essential gene	C5	set2		hypothetical protein	2770.93	-0.949683	2682.12	0.260749	3319.58	-0.21388	COG3865	[S] Function unknown					PA14_46720	1	hypothetical protein	PA1358	No
PA14_46780	PA14_RS19010	operon_2301	1	1	non essential gene	C5	set2		hypothetical protein	482.937	-0.00515602	478.811	0.0193694	548.841	0.0574919	COG2764	[S] Function unknown					PA14_46780	1	hypothetical protein	PA1353	No
PA14_61410	PA14_RS25090	operon_2302	1	1	non essential gene	C5	set2		hypothetical protein	719	-0.126395	679.388	-0.0524751	1173.32	-0.153267	COG2764	[S] Function unknown					PA14_61410	1	NA	NA	No
PA14_01560	PA14_RS00650	operon_2303	0	0	non essential gene	C5	set2		hypothetical protein	60.3542	0.158716	62.5633	0.379162	73.4809	0.423161	COG2824	[P] Inorganic ion transport and metabolism	essential gene				PA14_01560	1	hypothetical protein	PA0128	No
PA14_41010	PA14_RS16620	operon_2308	1	1	non essential gene	C5	set2		amino acid permease	615.734	0.00742043	594.003	0.0227731	1029.64	-0.0900033	COG0531	[E] Amino acid transport and metabolism					PA14_41010	1	putative amino acid	PA1819	No
PA14_24840	PA14_RS10065	operon_2309	1	1	non essential gene	C5	set2		transcriptional regulator	153.339	-0.101115	134.469	-0.181503	265.549	-0.117579	COG1309	[K] Transcription					PA14_24840	1	putative transcriptional regulator	PA3034	No
PA14_34210	PA14_RS13950	operon_231	1	0	non essential gene	C5	set2		transcriptional regulator	40.4705	0.0499818	43.0854	0.240405	54.2168	0.292815	COG3829	[K] Transcription					PA14_34180, PA14_34190, PA14_34200, PA14_34210	4	NADH-dependent FMN reductase, methanesulfonate sulfonatase MsuD, putative FMNH2-dependent monooxygenase, putative transcriptional regulator	PA2357, PA2356, PA2355, PA2354	No
PA14_34210	PA14_RS13950	operon_231	1	0	non essential gene	C5	set2		transcriptional regulator	40.4705	0.0499818	43.0854	0.240405	54.2168	0.292815	COG3829	[T] Signal transduction mechanisms					PA14_34180, PA14_34190, PA14_34200, PA14_34210	4	NADH-dependent FMN reductase, methanesulfonate sulfonatase MsuD, putative FMNH2-dependent monooxygenase, putative transcriptional regulator	PA2357, PA2356, PA2355, PA2354	No
PA14_65400	PA14_RS26730	operon_2314	1	1	non essential gene	C5	set2		iron-sulfur cluster-binding protein	3417.59	-0.00654748	3199.48	-0.131246	3932.4	-0.25486	COG1600	[C] Energy production and conversion					PA14_65400	1	putative iron-sulfur cluster-binding	PA4950	No
PA14_66330	PA14_RS27075	operon_2319	1	1	non essential gene	C5	set2	msrA	peptide methionine sulfoxide reductase	772.089	1.01944	796	0.292003	961.858	0.547082	COG0225	[O] Posttranslational modification, protein turnover, chaperones					PA14_66330	1	peptide methionine sulfoxide	PA5018	No
PA14_49180	PA14_RS19975	operon_232	1	1	non essential gene	C5	set2	phoP	two-component response regulator PhoP	95.5661	0.132074	90.4669	-0.0072632	213.201	0.0990686	COG0745	[K] Transcription					PA14_49170, PA14_49180	2	two-component sensor PhoQ, two-component response regulator	PA1180, PA1179	No
PA14_49180	PA14_RS19975	operon_232	1	1	non essential gene	C5	set2	phoP	two-component response regulator PhoP	95.5661	0.132074	90.4669	-0.0072632	213.201	0.0990686	COG0745	[T] Signal transduction mechanisms					PA14_49170, PA14_49180	2	two-component sensor PhoQ, two-component response regulator	PA1180, PA1179	No
PA14_11690	PA14_RS04735	operon_2320	1	1	non essential gene	C5	set2	ppa	inorganic pyrophosphatase	930.682	0.034635	787.701	-0.454269	1094.3	-0.441037	COG0221	[C] Energy production and conversion			essential gene	Core	PA14_11690	1	inorganic pyrophosphatase	PA4031	Yes
PA14_67490	PA14_RS27530	operon_2321	0	0	essential gene	C2	set2	fbp	fructose-1,6-bisphosphatase	3.61941	-1.43437	2.46533	-4.88496	4.28825	-5.61886	COG0158	[G] Carbohydrate transport and metabolism	essential gene	essential gene	essential gene	Core	PA14_67470, PA14_67490	2	hypothetical protein, fructose-1,6-bisphosphatase	PA5109, PA5110	Yes
PA14_50220	PA14_RS20385	operon_233	1	0	non essential gene	C5	set2	fleQ	transcriptional regulator FleQ	118.426	0.257586	128.633	0.452878	172.354	0.292798	COG2204	[T] Signal transduction mechanisms					PA14_50220	1	transcriptional regulator FleQ	PA1097	No
PA14_52250	PA14_RS21270	operon_234	1	1	essential gene	C4	set2		two-component response regulator	579.995	-0.170776	485.628	-1.04188	551.571	-1.43518	COG0745	[T] Signal transduction mechanisms					PA14_52240, PA14_52250	2	two-component sensor, two-component response regulator	PA0930, PA0929	No
PA14_52250	PA14_RS21270	operon_234	1	1	essential gene	C4	set2		two-component response regulator	579.995	-0.170776	485.628	-1.04188	551.571	-1.43518	COG0745	[K] Transcription					PA14_52240, PA14_52250	2	two-component sensor, two-component response regulator	PA0930, PA0929	No
PA14_54510	PA14_RS22185	operon_235	1	1	non essential gene	C5	set2		two-component response regulator	973.601	0.0392389	983.292	-0.0205465	2416.27	-0.0471496	COG0745	[T] Signal transduction mechanisms					PA14_54500, PA14_54510	2	two-component sensor, two-component response regulator	PA0757, PA0756	No
PA14_12230	PA14_RS04955	operon_2350	1	1	essential gene	C1	set1	leuS	leucyl-tRNA synthetase	27.1328	-3.37027	8.39875	-5.73938	0.934746	-3.179	COG0495	[J] Translation, ribosomal structure and biogenesis		essential gene	essential gene	Core	PA14_12200, PA14_12210, PA14_12230	3	DNA polymerase III, hypothetical protein, s; in	PA3989, PA3988, PA3987	Yes
PA14_14460	PA14_RS05780	operon_2351	1	0	non essential gene	C5	set2	holC	DNA polymerase III subunit chi	25.881	-0.260388	24.6625	0.385529	39.8219	0.640697	COG2927	[L] Replication, recombination and repair		essential gene			PA14_14460, PA14_14470	2	DNA polymerase III, leucyl aminopeptidase	PA3832, PA3831	No
PA14_14470	PA14_RS05785	operon_2352	1	1	essential gene	C4	set2	pepA	leucyl aminopeptidase	172.684	-0.475481	140.994	-1.07571	148.88	-1.39525	COG0260	[E] Amino acid transport and metabolism					PA14_14460, PA14_14470	2	DNA polymerase III, leucyl aminopeptidase	PA3832, PA3831	No
PA14_60260	PA14_RS24590	operon_236	1	1	non essential gene	C5	set2	pilR	two-component response regulator PilR	6219.87	0.0367101	6147.1	-0.0391	7307.65	-0.0603905	COG2204	[T] Signal transduction mechanisms					PA14_60240, PA14_60250, PA14_60260	3	NA, two-component sensor PilS, two-component response regulator	NA, PA4546, PA4547	No
PA14_60600	PA14_RS24760	operon_237	1	1	non essential gene	C5	set2	rtcR	transcriptional regulator RtcR	159.738	0.248572	181.183	0.588433	488.588	0.695573	COG4650	[K] Transcription					PA14_60600	1	transcriptional regulator RtcR	PA4581	No
PA14_60600	PA14_RS24760	operon_237	1	1	non essential gene	C5	set2	rtcR	transcriptional regulator RtcR	159.738	0.248572	181.183	0.588433	488.588	0.695573	COG4650	[T] Signal transduction mechanisms					PA14_60600	1	transcriptional regulator RtcR	PA4581	No
PA14_63150	PA14_RS25820	operon_238	1	1	non essential gene	C5	set2	pmrA	two-component response regulator	299.74	-0.0784427	339.443	0.0548557	550.798	0.106011	COG0745	[T] Signal transduction mechanisms					PA14_63110, PA14_63120, PA14_63130, PA14_63150, PA14_63160	5	putative S-adenosylmethionine decarboxylase, hypothetical protein, hypothetical protein, two-component response regulator, PmrB: two-component regulator	PA4773, PA4774, PA4775, PA4776, PA4777	No
PA14_64190	PA14_RS26230	operon_239	1	1	essential gene	C4	set1	fis	DNA-binding protein Fis	714.405	-0.980092	397.451	-1.76003	231.531	-2.27432	COG2901	[K] Transcription		essential gene		Core	PA14_64180, PA14_64190, PA14_64200, PA14_64220	4	hypothetical protein, DNA-binding protein Fis, bifunctional, phosphoribosylamine--glycine ligase	PA4852, PA4853, PA4854, PA4855	Yes
PA14_51820	PA14_RS21090	operon_2392	1	0	non essential gene	C5	set2	aspS	aspartyl-tRNA synthetase	71.8922	0.746023	61.4703	0.490124	71.1074	0.405561	COG0173	[J] Translation, ribosomal structure and biogenesis			essential gene	Core	PA14_51820	1	aspartyl-tRNA synthetase	PA0963	Yes
PA14_17210	PA14_RS06905	operon_2394	1	1	essential gene	C1	set1	lpxA	UDP-N-acetylglucosamine acyltransferase	1974.46	-2.79364	962.635	-6.73762	251.644	-10.5448	COG1043	[I] Lipid transport and metabolism	essential gene	essential gene	essential gene	Core	PA14_17170, PA14_17180, PA14_17190, PA14_17210, PA14_17220, PA14_17230	6	hypothetical protein, UDP-3-O-[3-hydroxymyristoyl] glucosamine, (3R)-hydroxymyristoyl-ACP dehydratase, UDP-N-acetylglucosamine acyltransferase, lipid-A-disaccharide synthase, ribonuclease HII	PA3647, PA3646, PA3645, PA3644, PA3643, PA3642	Yes
PA14_58790	PA14_RS23975	operon_2399	1	1	non essential gene	C5	set2		zinc-binding protein	662.509	-0.0587848	659.602	-0.0688835	1499.14	0.00908965	COG3024	[S] Function unknown					PA14_58760, PA14_58770, PA14_58780, PA14_58790	4	type 4 fimbrial, type 4 prepilin, dephospho-CoA kinase, zinc-binding protein	PA4527, PA4528, PA4529, PA4530	Yes
PA14_68040	PA14_RS27745	operon_24	1	1	non essential gene	C5	set2		short-chain dehydrogenase	4419.71	-0.0708359	4313.5	-0.120257	4898.54	-0.131036	COG1028	[I] Lipid transport and metabolism					PA14_68040	1	putative short-chain dehydrogenase	PA5150	No
PA14_68040	PA14_RS27745	operon_24	1	1	non essential gene	C5	set2		short-chain dehydrogenase	4419.71	-0.0708359	4313.5	-0.120257	4898.54	-0.131036	COG1028	[Q] Secondary metabolites biosynthesis, transport and catabolism					PA14_68040	1	putative short-chain dehydrogenase	PA5150	No
PA14_17340	PA14_RS06960	operon_240	1	1	essential gene	C4	set1	ispD	2-C-methyl-D-erythritol 4-phosphate cytidylyltransferase	5369.79	-0.26088	3804.19	-0.711536	1814.59	-1.2166	COG1211	[I] Lipid transport and metabolism		essential gene	essential gene	Core	PA14_17330, PA14_17340	2	hypothetical protein, 2-C-methyl-D-erythritol 4-phosphate	PA3634, PA3633	Yes
PA14_11860	PA14_RS04795	operon_2401	1	1	non essential gene	C5	set2		aromatic acid decarboxylase	1221.81	-0.0211987	1136.45	0.0076422	1281.89	-0.150581	COG0163	[H] Coenzyme transport and metabolism	essential gene	essential gene	essential gene	Conditional	PA14_11845, PA14_11860, PA14_11880	3	UDP-N-acetylmuramate:L-alanyl-gamma-D-glutamyl-, aromatic acid decarboxylase, hypothetical protein	PA4020, PA4019, PA4018	Yes
PA14_00190	PA14_RS00090	operon_2403	1	1	essential gene	C4	set2	fmt	methionyl-tRNA formyltransferase	924.118	-0.658288	764.516	-1.11448	894.069	-1.01442	COG0223	[J] Translation, ribosomal structure and biogenesis	essential gene		essential gene	Core	PA14_00170, PA14_00180, PA14_00190	3	potassium transporter peripheral, putative tRNA and, methionyl-tRNA formyltransferase	PA0016, PA0017, PA0018	Yes
PA14_00200	PA14_RS00095	operon_2403	1	1	essential gene	C2	set1	def	peptide deformylase	325.678	-1.79566	152.454	-4.54726	78.7194	-8.15963	COG0242	[J] Translation, ribosomal structure and biogenesis	essential gene	essential gene	essential gene	Conditional	PA14_00200	1	peptide deformylase	PA0019	Yes
PA14_28570	PA14_RS11625	operon_2404	1	1	non essential gene	C5	set2	endA	DNA-specific endonuclease I	327.873	-0.0780905	299.755	-0.269338	468.988	0.0210091	COG2356	[L] Replication, recombination and repair					PA14_28560, PA14_28570	2	hypothetical protein, DNA-specific endonuclease I	PA2750, PA2749	No
PA14_25500	PA14_RS10335	operon_2406	1	1	non essential gene	C5	set2		hypothetical protein	199.299	-0.170289	185.857	-0.262573	405.034	-0.36922	COG0848	[U] Intracellular trafficking, secretion, and vesicular transport		essential gene		Conditional	PA14_25490, PA14_25500, PA14_25510	3	putative tolQ-type transport, hypothetical protein, tetraacyldisaccharide 4'-kinase	PA2983, PA2982, PA2981	Yes
PA14_45130	PA14_RS18350	operon_241	1	1	essential gene	C4	set2		transporter	3580.88	-0.591613	3051.72	-1.10908	3066.26	-1.59841	COG3192	[E] Amino acid transport and metabolism					PA14_45120, PA14_45130	2	hypothetical protein, putative transporter	PA1492, PA1491	No
PA14_07740	PA14_RS03095	operon_2411	0	1	non essential gene	C5	set2	pdxA	4-hydroxythreonine-4-phosphate dehydrogenase	952.415	0.112256	1045.57	0.145555	1933.57	0.275941	COG1995	[H] Coenzyme transport and metabolism			essential gene	Conditional	PA14_07740	1	NA	NA	Yes
PA14_28910	PA14_RS11770	operon_2412	1	1	non essential gene	C5	set2		radical activating enzyme	500.415	0.586455	613.984	0.921704	842.58	1.21082	COG0602	[O] Posttranslational modification, protein turnover, chaperones					PA14_28880, PA14_28895, PA14_28910, PA14_28920	4	hypothetical protein, NA, putative radical activating, putative chaperone	PA2729, NA, PA2726, PA2725	No
PA14_29110	PA14_RS11865	operon_242	0	1	non essential gene	C5	set2	cysK	cysteine synthase A	847.596	0.358547	989.58	0.631305	2062.4	0.795516	COG0031	[E] Amino acid transport and metabolism					PA14_29100, PA14_29110	2	hypothetical protein, cysteine synthase A	PA2710, PA2709	No
PA14_03860	PA14_RS01580	operon_2422	1	1	non essential gene	C5	set2		glutamine synthetase	725.713	0.324935	794.133	0.528234	1151.53	0.772311	COG0174	[E] Amino acid transport and metabolism					PA14_03860	1	putative glutamine synthetase	PA0296	No
PA14_03880	PA14_RS01590	operon_2423	1	1	non essential gene	C5	set2	spuB	glutamine synthetase	1063.33	0.0515789	1098.93	0.165094	1800.49	0.250083	COG0174	[E] Amino acid transport and metabolism					PA14_03880	1	glutamine synthetase	PA0298	No
PA14_20670	PA14_RS08305	operon_2424	1	1	non essential gene	C5	set2		glutamine synthetase	1291.27	0.000657422	1173.04	-0.0675618	2525.02	-0.204791	COG0174	[E] Amino acid transport and metabolism					PA14_20670	1	putative glutamine synthetase	PA3356	No
PA14_44240	PA14_RS17970	operon_2426	1	1	essential gene	C4	set2		glutamine synthetase	13970.8	-0.911132	10758.4	-2.385	11384.3	-3.20633	COG0174	[E] Amino acid transport and metabolism					PA14_44240, PA14_44260	2	putative glutamine synthetase, putative oxidoreductase	PA1566, PA1565	No
PA14_67600	PA14_RS27575	operon_2427	1	0	essential gene	C2	set2	glnA	glutamine synthetase	105.315	-1.96674	84.0499	-4.8644	91.668	-8.59919	COG0174	[E] Amino acid transport and metabolism	essential gene	essential gene	essential gene	Core	PA14_67600	1	glutamine synthetase	PA5119	Yes
PA14_72690	PA14_RS29585	operon_2428	1	1	non essential gene	C5	set2		glutamine synthetase	131.583	0.0252399	129.895	-0.297972	218.559	-0.120001	COG0174	[E] Amino acid transport and metabolism					PA14_72650, PA14_72660, PA14_72690, PA14_72700, PA14_72710	5	hypothetical protein, hypothetical protein, putative glutamine synthetase, hypothetical protein, putative transporter	PA5506, PA5507, PA5508, PA5509, PA5510	No
PA14_72850	PA14_RS29655	operon_2429	1	1	non essential gene	C5	set2		glutamine synthetase	909.593	0.136692	922.732	0.273322	2066.49	0.423325	COG0174	[E] Amino acid transport and metabolism					PA14_72850, PA14_72870	2	putative glutamine synthetase, aminotransferase	PA5522, PA5523	No
PA14_50660	PA14_RS20565	operon_243	0	1	non essential gene	C5	set2		hypothetical protein	1068.58	-0.0638737	1069.08	-0.0831536	1704.2	-0.103955	COG0031	[E] Amino acid transport and metabolism					PA14_50640, PA14_50650, PA14_50660, PA14_50670	4	hypothetical protein, hypothetical protein, hypothetical protein, hypothetical protein	PA1063, PA1062, PA1061, PA1060	No
PA14_56300	PA14_RS22970	operon_2430	1	1	essential gene	C3	set1		fumarase	2449.33	-1.38937	1294.72	-2.43224	723.061	-3.67674	COG1838	[C] Energy production and conversion				Conditional	PA14_56300	1	putative fumarase	PA4333	Yes
PA14_23270	PA14_RS09420	operon_2436	1	0	non essential gene	C5	set2	serC	phosphoserine aminotransferase	24.1224	0.183292	28.8684	0.233051	45.8678	0.430565	COG1932	[E] Amino acid transport and metabolism		essential gene	essential gene	Conditional	PA14_23270, PA14_23280	2	phosphoserine aminotransferase, chorismate mutase	PA3167, PA3166	Yes
PA14_54320	PA14_RS22105	operon_2439	1	1	essential gene	C4	set2	era	GTP-binding protein Era	1311.12	-0.165748	942.081	-1.31433	1234.81	-2.2881	COG1159	[S] Function unknown	essential gene	essential gene	essential gene	Core	PA14_54320, PA14_54330, PA14_54340	3	GTP-binding protein Era, ribonuclease III, hypothetical protein	PA0771, PA0770, PA0769	Yes
PA14_54330	PA14_RS22110	operon_2439	1	1	essential gene	C2	set1	rnc	ribonuclease III	810.401	-1.09789	380.814	-3.36721	203.066	-6.18432	COG0571	[J] Translation, ribosomal structure and biogenesis		essential gene	essential gene	Conditional	PA14_54320, PA14_54330, PA14_54340	3	GTP-binding protein Era, ribonuclease III, hypothetical protein	PA0771, PA0770, PA0769	Yes
PA14_52210	PA14_RS21255	operon_244	1	1	non essential gene	C5	set2	cysM	cysteine synthase B	1048.85	-0.0392975	934.647	-0.434466	642.346	-0.600222	COG0031	[E] Amino acid transport and metabolism					PA14_52190, PA14_52210	2	NA, cysteine synthase B	NA, PA0932	No
PA14_36590	PA14_RS14895	operon_2440	1	0	non essential gene	C5	set2		4-alpha-glucanotransferase	71.8518	-0.0145873	79.0842	0.240833	194.016	0.535294	COG1640	[G] Carbohydrate transport and metabolism					PA14_36570, PA14_36580, PA14_36590, PA14_36605, PA14_36620, PA14_36630, PA14_36650, PA14_36660, PA14_36670, PA14_36680, PA14_36690, PA14_36700	12	glycogen synthase, putative glycosyl hydrolase, putative 4-alpha-glucanotransferase, putative glycosyl hydrolase, hypothetical protein, putative glycosyl hydrolase, hypothetical protein, putative alcohol dehydrogenase, hypothetical protein, hypothetical protein, cardiolipin synthase 2, hypothetical protein	PA2165, PA2164, PA2163, PA2162, PA2161, PA2160, PA2159, PA2158, PA2157, PA2156, PA2155, PA2154	No
PA14_60660	PA14_RS24780	operon_245	1	1	non essential gene	C5	set2		nucleotidyltransferase	18183.4	-0.0770018	18380.1	-0.0113125	44334	-0.0885542	COG3541	[S] Function unknown					PA14_60630, PA14_60650, PA14_60660, PA14_60670, PA14_60690	5	hypothetical protein, hypothetical protein, putative nucleotidyltransferase, RNA 3'-terminal-phosphate cyclase, putative lipoprotein	PA4582, PA4583, PA4584, PA4585, PA4586	No
PA14_60330	PA14_RS24640	operon_2450	0	1	essential gene	C3	set1	ispH	4-hydroxy-3-methylbut-2-enyl diphosphate reductase	24.4668	-1.00131	8.39139	-2.93372	4.51139	-3.96023	COG0761	[M] Cell wall/membrane/envelope biogenesis	essential gene		essential gene	Core	PA14_60330	1	NA	NA	Yes
PA14_60330	PA14_RS24640	operon_2450	0	1	essential gene	C3	set1	ispH	4-hydroxy-3-methylbut-2-enyl diphosphate reductase	24.4668	-1.00131	8.39139	-2.93372	4.51139	-3.96023	COG0761	[I] Lipid transport and metabolism	essential gene		essential gene	Core	PA14_60330	1	NA	NA	Yes
PA14_60350	PA14_RS24645	operon_2450	1	1	essential gene	C4	set1		peptidyl-prolyl cis-trans isomerase, FkbP-type	805.434	-0.533143	561.984	-0.919643	261.231	-1.40412	COG1047	[G] Carbohydrate transport and metabolism	essential gene	essential gene			PA14_60350, PA14_60360, PA14_60370, PA14_60380	4	peptidyl-prolyl cis-trans isomerase,, lipoprotein signal peptidase, isoleucyl-tRNA synthetase, bifunctional riboflavin kinase/FMN	PA4558, PA4559, PA4560, PA4561	Yes
PA14_00280	PA14_RS00120	operon_2453	1	0	essential gene	C2	set2	hemF	coproporphyrinogen III oxidase	29.3454	-1.43442	23.6488	-3.15693	19.17	-4.70172	COG0408	[H] Coenzyme transport and metabolism	essential gene	essential gene	essential gene	Conditional	PA14_00280, PA14_00290	2	coproporphyrinogen III oxidase, shikimate 5-dehydrogenase	PA0024, PA0025	Yes
PA14_61700	PA14_RS25210	operon_2456	1	0	essential gene	C1	set1	prfA	peptide chain release factor 1	169.807	-2.35795	57.7651	-6.51123	12.407	-5.4623	COG0216	[J] Translation, ribosomal structure and biogenesis	essential gene	essential gene	essential gene	Core	PA14_61660, PA14_61670, PA14_61680, PA14_61700, PA14_61710	5	glutamate racemase, molybdopterin biosynthesis protein, putative methyl transferase, peptide chain release, glutamyl-tRNA reductase	PA4662, PA4663, PA4664, PA4665, PA4666	Yes
PA14_03360	PA14_RS01380	operon_2458	0	1	non essential gene	C5	set2		hypothetical protein	733.573	-0.000247932	749.068	0.156165	1215.49	0.239583	COG4735	[S] Function unknown					PA14_03350, PA14_03360	2	NA, NA	NA, NA	No
PA14_22350	PA14_RS09050	operon_246	1	1	non essential gene	C5	set2	actP	acetate permease	559.007	-0.0386692	572.566	0.0658712	758.351	0.0691387	COG4147	[S] Function unknown					PA14_22340, PA14_22350	2	hypothetical protein, acetate permease	PA3235, PA3234	No
PA14_47100	PA14_RS19145	operon_2461	0	1	non essential gene	C5	set2	ilvA2	threonine dehydratase	1416.09	0.214271	1364.25	0.0544183	2614.4	0.108854	COG1171	[E] Amino acid transport and metabolism					PA14_47100, PA14_47110	2	threonine dehydratase, hypothetical protein	PA1326, PA1325	No
PA14_54150	PA14_RS22045	operon_247	1	1	non essential gene	C5	set2	putP	sodium/proline symporter PutP	353.793	0.0249986	344.372	-0.180352	382.208	-0.297738	COG0591	[E] Amino acid transport and metabolism					PA14_54150	1	sodium/proline symporter PutP	PA0783	No
PA14_50790	PA14_RS20625	operon_248	1	1	non essential gene	C5	set2		hypothetical protein	263.211	-0.0440799	292.852	0.121732	610.336	0.0998267	COG3835	[K] Transcription					PA14_50790, PA14_50800	2	hypothetical protein, pyridoxamine 5'-phosphate oxidase	PA1050, PA1049	Yes
PA14_50790	PA14_RS20625	operon_248	1	1	non essential gene	C5	set2		hypothetical protein	263.211	-0.0440799	292.852	0.121732	610.336	0.0998267	COG3835	[T] Signal transduction mechanisms					PA14_50790, PA14_50800	2	hypothetical protein, pyridoxamine 5'-phosphate oxidase	PA1050, PA1049	Yes
PA14_64370	PA14_RS26300	operon_2482	1	1	non essential gene	C5	set2	ureB	urease subunit beta	462.116	0.249123	469.959	0.153318	537.022	0.239401	COG0832	[E] Amino acid transport and metabolism					PA14_64350, PA14_64360, PA14_64370	3	urease subunit gamma, hypothetical protein, urease subunit beta	PA4865, PA4866, PA4867	No
PA14_64390	PA14_RS26305	operon_2482	1	1	non essential gene	C5	set2	ureC	urease subunit alpha	1396.97	0.201846	1363.15	0.145504	3166.71	0.094273	COG0804	[E] Amino acid transport and metabolism					PA14_64390, PA14_64400	2	urease subunit alpha, hypothetical protein	PA4868, PA4869	No
PA14_52580	PA14_RS21415	operon_249	1	1	essential gene	C4	set1	lysC	aspartate kinase	2950.9	-0.358341	1669.24	-0.701002	576.014	-1.0628	COG0527	[E] Amino acid transport and metabolism		essential gene		Core	PA14_52580	1	aspartate kinase	PA0904	Yes
PA14_57040	PA14_RS23255	operon_2490	1	1	non essential gene	C5	set2		hypothetical protein	261.711	-0.157458	268.099	0.029853	325.691	0.173842	COG0748	[P] Inorganic ion transport and metabolism					PA14_57030, PA14_57040	2	ion of, hypothetical protein	PA4387, PA4388	No
PA14_61250	PA14_RS25015	operon_2497	1	1	non essential gene	C5	set2	lysP	APC family lysine-specific permease	549.129	0.410417	611.267	0.607305	1021.48	0.966053	COG0833	[E] Amino acid transport and metabolism					PA14_61250	1	APC family lysine-specific	PA4628	No
PA14_65850	PA14_RS26885	operon_2498	0	1	non essential gene	C5	set2		amino acid ABC transporter permease	302.482	0.359866	297.515	0.451185	395.615	0.683109	COG0833	[E] Amino acid transport and metabolism					PA14_65850	1	amino acid ABC	PA4981	No
PA14_72880	PA14_RS29665	operon_25	1	1	non essential gene	C5	set2		short-chain dehydrogenase	794.29	0.00834973	837.407	0.217696	1027.48	0.107522	COG1028	[Q] Secondary metabolites biosynthesis, transport and catabolism					PA14_72880, PA14_72890	2	putative short-chain dehydrogenase, putative transcriptional regulator	PA5524, PA5525	No
PA14_72880	PA14_RS29665	operon_25	1	1	non essential gene	C5	set2		short-chain dehydrogenase	794.29	0.00834973	837.407	0.217696	1027.48	0.107522	COG1028	[I] Lipid transport and metabolism					PA14_72880, PA14_72890	2	putative short-chain dehydrogenase, putative transcriptional regulator	PA5524, PA5525	No
PA14_15830	PA14_RS06335	operon_250	1	1	non essential gene	C5	set2		GntR family transcriptional regulator	2322.03	0.0887749	2410.24	0.116269	3128.65	0.180476	COG2188	[K] Transcription					PA14_15780, PA14_15790, PA14_15810, PA14_15820, PA14_15830	5	PTS system N-acetylglucosamine-specific, putative phosphoenolpyruvate-protein, putative aminotransferase, putative N-acetylglucosamine-6-phosphate, GntR family transcriptional	PA3761, PA3760, PA3759, PA3758, PA3757	No
PA14_25490	PA14_RS10330	operon_2508	1	0	essential gene	C1	set1		tolQ-type transport protein	133.087	-2.70662	73.9998	-6.39049	36.1324	-8.46037	COG0811	[U] Intracellular trafficking, secretion, and vesicular transport		essential gene			PA14_25490, PA14_25500, PA14_25510	3	putative tolQ-type transport, hypothetical protein, tetraacyldisaccharide 4'-kinase	PA2983, PA2982, PA2981	Yes
PA14_21970	PA14_RS08875	operon_251	1	1	non essential gene	C5	set2		transcriptional regulator	641.115	0.134183	625.575	-0.0259817	1440.17	-0.00426937	COG2188	[K] Transcription					PA14_21970, PA14_21980	2	transcriptional regulator, hypothetical protein	PA3249, PA3248	No
PA14_62910	PA14_RS25720	operon_2515	1	1	non essential gene	C5	set2	carB	carbamoyl phosphate synthase large subunit	225.39	-0.0503573	211.278	-0.135008	512.189	0.0313556	COG0458	[F] Nucleotide transport and metabolism		essential gene		Conditional	PA14_62910	1	ion of	PA4756	Yes
PA14_37870	PA14_RS15400	operon_2517	1	1	non essential gene	C5	set2	sppB	ABC transporter permease, SppB	2718.37	-0.0532483	2643.67	-0.130515	4054.56	-0.167908	COG4174	[P] Inorganic ion transport and metabolism					PA14_37840, PA14_37850, PA14_37870, PA14_37880, PA14_37900	5	putative ATP-binding component, putative permease of, putative peptide ABC, putative binding protein, putative TonB-dependent receptor	PA2061, PA2060, PA2059, PA2058, PA2057	No
PA14_41140	PA14_RS16670	operon_2518	1	1	non essential gene	C5	set2	nppB	peptidyl nucleoside antibiotic ABC transporter permease NppB	2636.91	-0.0944354	2609.96	-0.257453	3960.11	-0.339775	COG4174	[P] Inorganic ion transport and metabolism					PA14_41110, PA14_41130, PA14_41140, PA14_41150, PA14_41160, PA14_41170	6	putative solute-binding protein, putative binding protein, ABC transporter permease, putative permease of, putative ATP-binding component, NADH-dependent enoyl-ACP reductase	PA1811, PA1810, PA1809, PA1808, PA1807, PA1806	No
PA14_27900	PA14_RS11310	operon_252	1	1	non essential gene	C5	set2		transcriptional regulator	184.674	0.343046	219.965	0.698208	463.95	0.873139	COG2188	[K] Transcription					PA14_27900	1	putative transcriptional regulator	PA2802	No
PA14_26910	PA14_RS10885	operon_2523	1	1	non essential gene	C5	set2		hypothetical protein	1664.4	0.180047	1722.19	0.0841794	2112.82	0.188406	COG0714	[S] Function unknown					PA14_26910, PA14_26920, PA14_26930	3	hypothetical protein, hypothetical protein, transglutaminase-like domain-containing	PA2875, PA2874, PA2873	No
PA14_26930	PA14_RS10895	operon_2523	1	1	non essential gene	C5	set2		transglutaminase	231.291	0.0923324	263.293	0.532023	659.611	0.600609	COG1305	[E] Amino acid transport and metabolism					PA14_26910, PA14_26920, PA14_26930	3	hypothetical protein, hypothetical protein, transglutaminase-like domain-containing	PA2875, PA2874, PA2873	No
PA14_71940	PA14_RS29295	operon_2524	0	1	non essential gene	C5	set2	wzt	ABC subunit of A-band LPS efflux transporter	211.68	0.466725	225.783	0.509046	532.481	0.669805	COG1134	[M] Cell wall/membrane/envelope biogenesis					PA14_71910, PA14_71920, PA14_71930, PA14_71940, PA14_71960, PA14_71970, PA14_71990, PA14_72000	8	glycosyltransferase WbpZ, glycosyltransferase WbpY, glycosyltransferase WbpX, ABC subunit of, membrane subunit of, GDP-mannose pyrophosphorylase, GDP-mannose 4,6-dehydratase, oxidoreductase Rmd	PA5447, PA5448, PA5449, PA5450, PA5451, PA5452, PA5453, PA5454	No
PA14_71940	PA14_RS29295	operon_2524	0	1	non essential gene	C5	set2	wzt	ABC subunit of A-band LPS efflux transporter	211.68	0.466725	225.783	0.509046	532.481	0.669805	COG1134	[G] Carbohydrate transport and metabolism					PA14_71910, PA14_71920, PA14_71930, PA14_71940, PA14_71960, PA14_71970, PA14_71990, PA14_72000	8	glycosyltransferase WbpZ, glycosyltransferase WbpY, glycosyltransferase WbpX, ABC subunit of, membrane subunit of, GDP-mannose pyrophosphorylase, GDP-mannose 4,6-dehydratase, oxidoreductase Rmd	PA5447, PA5448, PA5449, PA5450, PA5451, PA5452, PA5453, PA5454	No
PA14_71960	PA14_RS29300	operon_2524	1	1	non essential gene	C5	set2	wzm	membrane subunit of A-band LPS efflux transporter	214.92	-0.154917	202.852	-0.12984	456.387	-0.117226	COG1682	[G] Carbohydrate transport and metabolism					PA14_71910, PA14_71920, PA14_71930, PA14_71940, PA14_71960, PA14_71970, PA14_71990, PA14_72000	8	glycosyltransferase WbpZ, glycosyltransferase WbpY, glycosyltransferase WbpX, ABC subunit of, membrane subunit of, GDP-mannose pyrophosphorylase, GDP-mannose 4,6-dehydratase, oxidoreductase Rmd	PA5447, PA5448, PA5449, PA5450, PA5451, PA5452, PA5453, PA5454	No
PA14_71960	PA14_RS29300	operon_2524	1	1	non essential gene	C5	set2	wzm	membrane subunit of A-band LPS efflux transporter	214.92	-0.154917	202.852	-0.12984	456.387	-0.117226	COG1682	[M] Cell wall/membrane/envelope biogenesis					PA14_71910, PA14_71920, PA14_71930, PA14_71940, PA14_71960, PA14_71970, PA14_71990, PA14_72000	8	glycosyltransferase WbpZ, glycosyltransferase WbpY, glycosyltransferase WbpX, ABC subunit of, membrane subunit of, GDP-mannose pyrophosphorylase, GDP-mannose 4,6-dehydratase, oxidoreductase Rmd	PA5447, PA5448, PA5449, PA5450, PA5451, PA5452, PA5453, PA5454	No
PA14_28690	PA14_RS11685	operon_2525	1	1	essential gene	C2	set2	pheS	phenylalanyl-tRNA synthetase subunit alpha	211.248	-1.22045	155.959	-3.10747	176.116	-4.20628	COG0016	[J] Translation, ribosomal structure and biogenesis	essential gene	essential gene	essential gene	Core	PA14_28690, PA14_28710	2	phenylalanyl-tRNA synthetase subunit, phenylalanyl-tRNA synthetase subunit	PA2740, PA2739	Yes
PA14_28710	PA14_RS11690	operon_2525	1	1	essential gene	C3	set1	pheT	phenylalanyl-tRNA synthetase subunit beta	161.641	-2.73877	100.852	-2.97518	29.9249	-3.40159	COG0072	[J] Translation, ribosomal structure and biogenesis		essential gene	essential gene	Core	PA14_28690, PA14_28710	2	phenylalanyl-tRNA synthetase subunit, phenylalanyl-tRNA synthetase subunit	PA2740, PA2739	Yes
PA14_17100	PA14_RS06860	operon_2526	0	1	essential gene	C3	set2	frr	ribosome recycling factor	601.06	-1.8606	562.225	-2.44058	673.497	-2.3477	COG0233	[J] Translation, ribosomal structure and biogenesis	essential gene	essential gene	essential gene	Core	PA14_17100, PA14_17110, PA14_17120, PA14_17130, PA14_17140, PA14_17150	6	ribosome recycling factor, undecaprenyl pyrophosphate synthetase, phosphatidate cytidylyltransferase, 1-deoxy-D-xylulose 5-phosphate, putative membrane-associated zinc, putative outer membrane	PA3653, PA3652, PA3651, PA3650, PA3649, PA3648	Yes
PA14_07550	PA14_RS03020	operon_2527	0	1	essential gene	C2	set1		hypothetical protein	9.36983	-1.19545	3.50085	-3.70491	2.45412	-4.56868	COG1610	[S] Function unknown		essential gene			PA14_07550	1	hypothetical protein	PA0578	No
PA14_07560	PA14_RS03025	operon_2527	1	0	non essential gene	C5	set2	rpsU	30S ribosomal protein S21	31.3093	0.390098	31.1203	0.568832	71.0265	0.346392	COG0828	[J] Translation, ribosomal structure and biogenesis		essential gene		Core	PA14_07560	1	30S ribosomal protein	PA0579	Yes
PA14_34880	PA14_RS14200	operon_253	0	0	essential gene	C4	set1		GntR family transcriptional regulator	52.2688	-0.669838	34.0059	-0.554673	18.0036	-1.37872	COG2188	[K] Transcription					PA14_34880, PA14_34900, PA14_34920	3	GntR family transcriptional, putative oxidoreductase, putative ferredoxin	PA2299, PA2298, PA2297	No
PA14_70440	PA14_RS28690	operon_2532	0	1	essential gene	C1	set1	gmk	guanylate kinase	62.4986	-2.97196	33.1507	-7.74421	16.0158	-7.29859	COG0194	[F] Nucleotide transport and metabolism		essential gene	essential gene	Core	PA14_70440	1	guanylate kinase	PA5336	Yes
PA14_70450	PA14_RS28695	operon_2532	1	1	essential gene	C4	set2	rpoZ	DNA-directed RNA polymerase subunit omega	301.208	-0.50019	261.372	-1.00432	489.758	-1.31576	COG1758	[K] Transcription		essential gene			PA14_70450	1	DNA-directed RNA polymerase	PA5337	No
PA14_68800	PA14_RS28045	operon_2536	1	1	non essential gene	C5	set2		hypothetical protein	282.111	0.331067	297.675	0.602075	403.369	0.709662	COG1392	[P] Inorganic ion transport and metabolism					PA14_68800	1	hypothetical protein	PA5208	No
PA14_72620	PA14_RS29560	operon_2537	0	1	non essential gene	C5	set2	metN	DL-methionine transporter ATP-binding subunit	12479.2	-0.166492	11949.5	-0.158568	22318.5	-0.200942	COG1135	[P] Inorganic ion transport and metabolism					PA14_72620, PA14_72630	2	putative ATP-binding component, putative permease of	PA5503, PA5504	No
PA14_72630	PA14_RS29565	operon_2537	1	1	non essential gene	C5	set2		ABC transporter permease	2457.3	-0.113789	2212.56	-0.226679	3079.81	-0.198563	COG2011	[P] Inorganic ion transport and metabolism					PA14_72620, PA14_72630	2	putative ATP-binding component, putative permease of	PA5503, PA5504	No
PA14_72640	PA14_RS29570	operon_2537	1	1	non essential gene	C5	set2		TonB-dependent receptor	1112.76	-0.0225288	1117.83	0.137704	2704.7	0.079711	COG1464	[P] Inorganic ion transport and metabolism					PA14_72640	1	putative TonB-dependent receptor	PA5505	No
PA14_57580	PA14_RS23475	operon_2538	1	1	essential gene	C1	set1	rpsI	30S ribosomal protein S9	203.821	-2.09789	109.097	-3.88354	45.0931	-5.81684	COG0103	[J] Translation, ribosomal structure and biogenesis			essential gene	Core	PA14_57580, PA14_57590	2	30S ribosomal protein, 50S ribosomal protein	PA4432, PA4433	Yes
PA14_57590	PA14_RS23480	operon_2538	1	0	essential gene	C1	set2	rplM	50S ribosomal protein L13	5.46247	-5.15959	1.5589	-4.22298	1.92681	-4.47811	COG0102	[J] Translation, ribosomal structure and biogenesis	essential gene	essential gene	essential gene	Core	PA14_57580, PA14_57590	2	30S ribosomal protein, 50S ribosomal protein	PA4432, PA4433	Yes
PA14_49630	PA14_RS20150	operon_254	1	1	non essential gene	C5	set2		transcriptional regulator	515.92	0.0367986	554.277	0.193288	674.554	0.305813	COG2188	[K] Transcription					PA14_49630, PA14_49640	2	transcriptional regulator, transcriptional regulator	PA1142, PA1141	No
PA14_04590	PA14_RS01865	operon_2543	1	1	non essential gene	C5	set2		hypothetical protein	172.832	-0.0665857	173.081	-0.082412	207.398	0.134152	COG0622	[S] Function unknown					PA14_04590	1	hypothetical protein	PA0351	No
PA14_00420	PA14_RS00170	operon_2545	0	1	non essential gene	C5	set2		histidine phosphotransfer domain-containing protein	190.64	-0.0957706	180.024	-0.223234	376.766	-0.175416	COG2198	[T] Signal transduction mechanisms					PA14_00420, PA14_00430	2	histidine phosphotransfer domain-containing, putative two-component response	PA0033, PA0034	No
PA14_30840	PA14_RS12585	operon_2546	1	1	non essential gene	C5	set2		signal transduction histidine kinase	699.278	-0.0424097	618.797	0.0472502	1418.19	-0.202747	COG4191	[T] Signal transduction mechanisms					PA14_30840	1	putative signal transduction	PA2571	No
PA14_51480	PA14_RS20935	operon_2547	1	1	non essential gene	C5	set2		hypothetical protein	886.78	0.343906	977.287	0.571193	1228.03	0.859359	COG0642	[T] Signal transduction mechanisms					PA14_51480	1	hypothetical protein	PA0991	No
PA14_37610	PA14_RS15300	operon_255	1	0	non essential gene	C5	set2		kynureninase	108.563	0.275515	117.593	0.176056	250.817	0.700202	COG3844	[E] Amino acid transport and metabolism					PA14_37590, PA14_37610	2	kynurenine formamidase, KynB, kynureninase	PA2081, PA2080	No
PA14_31760	PA14_RS13000	operon_2554	0	1	non essential gene	C5	set2		phosphatidate cytidylyltransferase	215.057	0.168626	238.295	0.359054	536.325	0.834578	COG4589	[S] Function unknown					PA14_31680, PA14_31690, PA14_31700, PA14_31720, PA14_31730, PA14_31740, PA14_31750, PA14_31760	8	hypothetical protein, hypothetical protein, putative CDP-alcohol phosphatidyltransferase, hypothetical protein, hypothetical protein, hypothetical protein, putative acyltransferase, putative phosphatidate cytidylyltransferase	PA2543, PA2542, PA2541, PA2540, PA2539, PA2538, PA2537, PA2536	No
PA14_08560	PA14_RS03445	operon_2555	1	1	non essential gene	C5	set2	tyrZ	tyrosyl-tRNA synthetase	1068.54	0.2937	1197.12	0.618587	2082.91	0.90096	COG0162	[J] Translation, ribosomal structure and biogenesis					PA14_08560	1	tyrosyl-tRNA synthetase	PA0668	No
PA14_10420	PA14_RS04210	operon_2556	1	1	non essential gene	C5	set2	tyrS	tyrosyl-tRNA synthetase	3029.6	-0.00795105	3027.27	-0.112217	3738.67	-0.116576	COG0162	[J] Translation, ribosomal structure and biogenesis					PA14_10420	1	tyrosyl-tRNA synthetase	PA4138	No
PA14_17250	PA14_RS06920	operon_256	0	1	non essential gene	C5	set2		amino acid permease	123.828	-0.133093	130.097	-0.0307693	234.16	-0.317042	COG1115	[U] Intracellular trafficking, secretion, and vesicular transport					PA14_17250	1	putative amino acid	PA3641	No
PA14_59690	PA14_RS24340	operon_2566	0	1	non essential gene	C5	set2		hypothetical protein	719.17	0.497883	843.703	0.841112	1220.21	1.10138	COG3505	[U] Intracellular trafficking, secretion, and vesicular transport					PA14_59640, PA14_59650, PA14_59660, PA14_59670, PA14_59680, PA14_59690, PA14_59700	7	NA, NA, NA, NA, NA, NA, NA	NA, NA, NA, NA, NA, NA, NA	No
PA14_31800	PA14_RS13015	operon_257	1	0	non essential gene	C5	set2		sodium:alanine symporter	142.424	0.129423	145.989	0.153895	202.108	0.357591	COG1115	[E] Amino acid transport and metabolism					PA14_31800	1	putative sodium:alanine symporter	PA2533	No
PA14_17230	PA14_RS06915	operon_2575	1	0	non essential gene	C5	set2	rnhB	ribonuclease HII	87.9438	0.237531	98.7602	0.277193	119.188	0.672562	COG0164	[L] Replication, recombination and repair					PA14_17170, PA14_17180, PA14_17190, PA14_17210, PA14_17220, PA14_17230	6	hypothetical protein, UDP-3-O-[3-hydroxymyristoyl] glucosamine, (3R)-hydroxymyristoyl-ACP dehydratase, UDP-N-acetylglucosamine acyltransferase, lipid-A-disaccharide synthase, ribonuclease HII	PA3647, PA3646, PA3645, PA3644, PA3643, PA3642	Yes
PA14_20560	PA14_RS08255	operon_2578	1	0	non essential gene	C5	set2	amiE	acylamide amidohydrolase	70.5729	0.25374	63.0599	-0.107588	120.49	-0.0405923	COG0388	[S] Function unknown					PA14_20560, PA14_20570, PA14_20580, PA14_20590	4	acylamide amidohydrolase, putative chaperone, aliphatic amidase expression-regulating, aliphatic amidase regulator	PA3366, PA3365, PA3364, PA3363	No
PA14_20570	PA14_RS08260	operon_2579	1	1	non essential gene	C5	set2		chaperone	4045.14	-0.145114	3925.72	-0.184582	4793.31	-0.30651	COG0542	[O] Posttranslational modification, protein turnover, chaperones					PA14_20560, PA14_20570, PA14_20580, PA14_20590	4	acylamide amidohydrolase, putative chaperone, aliphatic amidase expression-regulating, aliphatic amidase regulator	PA3366, PA3365, PA3364, PA3363	No
PA14_35460	PA14_RS14425	operon_258	1	1	non essential gene	C5	set2		AGCS sodium/alanine/glycine symporter	2207.34	0.0213421	2075.07	-0.0494874	2429.83	-0.0920918	COG1115	[E] Amino acid transport and metabolism					PA14_35460	1	putative AGCS sodium/alanine/glycine	PA2252	No
PA14_68330	PA14_RS27855	operon_2581	1	1	essential gene	C3	set1	arcA	arginine deiminase	2732.94	-1.13497	1523.04	-2.17241	986.94	-3.21174	COG2235	[E] Amino acid transport and metabolism					PA14_68330, PA14_68340, PA14_68350	3	arginine deiminase, ornithine carbamoyltransferase, carbamate kinase	PA5171, PA5172, PA5173	No
PA14_68350	PA14_RS27865	operon_2581	1	1	non essential gene	C5	set2	arcC	carbamate kinase	1026.19	-0.0526727	1000.48	-0.107971	1193.71	-0.150521	COG0549	[E] Amino acid transport and metabolism					PA14_68330, PA14_68340, PA14_68350	3	arginine deiminase, ornithine carbamoyltransferase, carbamate kinase	PA5171, PA5172, PA5173	No
PA14_58010	PA14_RS23660	operon_2582	1	0	non essential gene	C5	set2		hypothetical protein	28.7837	-0.112015	33.5968	0.0299806	54.7793	0.0463345	2EGCE						PA14_57990, PA14_58000, PA14_58010, PA14_58030, PA14_58040	5	hypothetical protein, superoxide dismutase, hypothetical protein, NA, hypothetical protein	PA4467, PA4468, PA4469, NA, PA4471	No
PA14_29360	PA14_RS11975	operon_2583	1	0	non essential gene	C5	set2	pfeS	two-component sensor PfeS	104.856	0.326674	107.346	0.112698	187.261	0.0429721	COG0642	[T] Signal transduction mechanisms					PA14_29340, PA14_29350, PA14_29360, PA14_29375	4	hypothetical protein, outer membrane receptor, two-component sensor PfeS, NA	PA2689, PA2688, PA2687, NA	No
PA14_52240	PA14_RS21265	operon_2584	1	1	non essential gene	C5	set2		two-component sensor	601.626	-0.322856	608.554	0.0195501	1035.98	-0.0782981	COG0642	[T] Signal transduction mechanisms					PA14_52240, PA14_52250	2	two-component sensor, two-component response regulator	PA0930, PA0929	No
PA14_19100	PA14_RS07650	operon_2586	1	1	non essential gene	C5	set2	rhlA	rhamnosyltransferase chain A	1044.94	0.0802602	1080.04	0.196619	1269.76	0.245662	COG2267	[I] Lipid transport and metabolism					PA14_19100, PA14_19110	2	rhamnosyltransferase chain A, rhamnosyltransferase chain B	PA3479, PA3478	No
PA14_19110	PA14_RS07655	operon_2586	1	0	non essential gene	C5	set2	rhlB	rhamnosyltransferase chain B	29.0274	0.530673	30.3502	0.403593	44.5935	0.290646	COG1819	[C] Energy production and conversion					PA14_19100, PA14_19110	2	rhamnosyltransferase chain A, rhamnosyltransferase chain B	PA3479, PA3478	No
PA14_19110	PA14_RS07655	operon_2586	1	0	non essential gene	C5	set2	rhlB	rhamnosyltransferase chain B	29.0274	0.530673	30.3502	0.403593	44.5935	0.290646	COG1819	[G] Carbohydrate transport and metabolism					PA14_19100, PA14_19110	2	rhamnosyltransferase chain A, rhamnosyltransferase chain B	PA3479, PA3478	No
PA14_52660	PA14_RS21440	operon_2587	1	0	non essential gene	C5	set2	aruB	succinylarginine dihydrolase	97.5083	-0.0411706	102.263	-0.0476777	126.822	0.173493	COG3724	[E] Amino acid transport and metabolism					PA14_52630, PA14_52640, PA14_52660, PA14_52670, PA14_52690, PA14_52700, PA14_52720	7	succinylglutamate desuccinylase, hypothetical protein, succinylarginine dihydrolase, NA, arginine/ornithine succinyltransferase AII, arginine/ornithine succinyltransferase AI, NA	PA0901, PA0900, PA0899, NA, PA0897, PA0896, NA	No
PA14_52690	PA14_RS21450	operon_2587	1	1	non essential gene	C5	set2	aruG	arginine/ornithine succinyltransferase AII subunit	694.294	-0.36016	644.182	-0.516524	1209.63	-0.87362	COG3138	[E] Amino acid transport and metabolism					PA14_52630, PA14_52640, PA14_52660, PA14_52670, PA14_52690, PA14_52700, PA14_52720	7	succinylglutamate desuccinylase, hypothetical protein, succinylarginine dihydrolase, NA, arginine/ornithine succinyltransferase AII, arginine/ornithine succinyltransferase AI, NA	PA0901, PA0900, PA0899, NA, PA0897, PA0896, NA	No
PA14_52700	PA14_RS21455	operon_2587	1	1	non essential gene	C5	set2	aruF	arginine/ornithine succinyltransferase AI subunit	747.213	0.303994	847.508	0.561514	1269.71	0.791556	COG3138	[E] Amino acid transport and metabolism					PA14_52630, PA14_52640, PA14_52660, PA14_52670, PA14_52690, PA14_52700, PA14_52720	7	succinylglutamate desuccinylase, hypothetical protein, succinylarginine dihydrolase, NA, arginine/ornithine succinyltransferase AII, arginine/ornithine succinyltransferase AI, NA	PA0901, PA0900, PA0899, NA, PA0897, PA0896, NA	No
PA14_52990	PA14_RS21575	operon_2588	1	1	non essential gene	C5	set2	phhA	phenylalanine 4-monooxygenase	2695.13	-0.263122	2417.03	-0.560539	3288.47	-0.935835	COG3186	[E] Amino acid transport and metabolism					PA14_52990	1	phenylalanine 4-monooxygenase	PA0872	No
PA14_53000	PA14_RS21580	operon_2588	1	1	non essential gene	C5	set2	phhB	pterin-4-alpha-carbinolamine dehydratase	295.434	-0.194185	282.225	-0.0390137	371.908	-0.144139	COG2154	[H] Coenzyme transport and metabolism					PA14_53000, PA14_53010	2	pterin-4-alpha-carbinolamine dehydratase, aromatic amino acid	PA0871, PA0870	No
PA14_42700	PA14_RS17335	operon_259	0	1	non essential gene	C5	set2	alkA	DNA-3-methyladenine glycosidase II	338.946	0.00996303	351.375	-0.00316873	515.04	-0.0483705	COG0122	[L] Replication, recombination and repair					PA14_42700	1	DNA-3-methyladenine glycosidase II	PA1686	No
PA14_35100	PA14_RS14290	operon_2590	1	1	non essential gene	C5	set2	arsC	arsenate reductase	488.353	-0.196754	450.196	-0.244808	725.847	-0.21029	COG0394	[T] Signal transduction mechanisms	essential gene	essential gene			PA14_35080, PA14_35100, PA14_35110, PA14_35130	4	putative arsenical resistance, arsenate reductase, ArsB protein, arsenic resistance transcriptional	PA2280, PA2279, PA2278, PA2277	No
PA14_34180	PA14_RS13935	operon_2591	0	1	non essential gene	C5	set2	msuE	NADH-dependent FMN reductase MsuE	232.768	0.214934	229.45	0.177062	509.743	0.200498	COG0431	[S] Function unknown					PA14_34180, PA14_34190, PA14_34200, PA14_34210	4	NADH-dependent FMN reductase, methanesulfonate sulfonatase MsuD, putative FMNH2-dependent monooxygenase, putative transcriptional regulator	PA2357, PA2356, PA2355, PA2354	No
PA14_34190	PA14_RS13940	operon_2591	1	1	non essential gene	C5	set2	msuD	methanesulfonate sulfonatase MsuD	1307.42	-0.109858	1304.48	0.00657844	1652.73	-0.0240314	COG2141	[C] Energy production and conversion					PA14_34180, PA14_34190, PA14_34200, PA14_34210	4	NADH-dependent FMN reductase, methanesulfonate sulfonatase MsuD, putative FMNH2-dependent monooxygenase, putative transcriptional regulator	PA2357, PA2356, PA2355, PA2354	No
PA14_35390	PA14_RS14400	operon_2593	1	1	non essential gene	C5	set2	pvcD	pyoverdine biosynthesis protein PvcD	352.142	0.0294607	368.523	-0.00956925	935.486	0.00807772	COG2863	[C] Energy production and conversion					PA14_35390, PA14_35400, PA14_35420, PA14_35430	4	pyoverdine biosynthesis protein, pyoverdine biosynthesis protein, pyoverdine biosynthesis protein, pyoverdine biosynthesis protein	PA2257, PA2256, PA2255, PA2254	No
PA14_35400	PA14_RS14405	operon_2593	1	1	essential gene	C3	set1	pvcC	pyoverdine biosynthesis protein PvcC	421	-1.07246	269.395	-2.40707	192.967	-2.68268	COG2368	[Q] Secondary metabolites biosynthesis, transport and catabolism					PA14_35390, PA14_35400, PA14_35420, PA14_35430	4	pyoverdine biosynthesis protein, pyoverdine biosynthesis protein, pyoverdine biosynthesis protein, pyoverdine biosynthesis protein	PA2257, PA2256, PA2255, PA2254	No
PA14_35420	PA14_RS14410	operon_2593	1	0	non essential gene	C5	set2	pvcB	pyoverdine biosynthesis protein PvcB	119.47	-0.164864	124.426	-0.172958	156.428	-0.200056	COG2175	[Q] Secondary metabolites biosynthesis, transport and catabolism					PA14_35390, PA14_35400, PA14_35420, PA14_35430	4	pyoverdine biosynthesis protein, pyoverdine biosynthesis protein, pyoverdine biosynthesis protein, pyoverdine biosynthesis protein	PA2257, PA2256, PA2255, PA2254	No
PA14_35430	PA14_RS14415	operon_2593	1	1	non essential gene	C5	set2	pvcA	pyoverdine biosynthesis protein PvcA	2036.89	-0.196097	2054.09	-0.0758492	2419.33	-0.191744	COG3207	[Q] Secondary metabolites biosynthesis, transport and catabolism					PA14_35390, PA14_35400, PA14_35420, PA14_35430	4	pyoverdine biosynthesis protein, pyoverdine biosynthesis protein, pyoverdine biosynthesis protein, pyoverdine biosynthesis protein	PA2257, PA2256, PA2255, PA2254	No
PA14_54300	PA14_RS22100	operon_2594	1	0	essential gene	C3	set2	recO	DNA repair protein RecO	14.7897	-1.07876	12.8212	-0.590749	37.4912	-0.590268	COG1381	[L] Replication, recombination and repair					PA14_54300	1	ion of RecA-coated	PA0772	No
PA14_50130	PA14_RS20360	operon_2597	1	1	non essential gene	C5	set2	fliG	flagellar motor switch protein G	964.032	0.339893	1104.48	0.570445	1368.5	0.780106	COG1536	[N] Cell motility					PA14_50080, PA14_50100, PA14_50110, PA14_50130, PA14_50140, PA14_50160	6	flagellar biosynthesis chaperone, flagellum-specific ATP synthase, flagellar assembly protein, flagellar motor switch, flagellar MS-ring protein, flagellar hook-basal body	PA1105, PA1104, PA1103, PA1102, PA1101, PA1100	No
PA14_50140	PA14_RS20365	operon_2597	1	0	non essential gene	C5	set2	fliF	flagellar MS-ring protein	96.1697	0.273453	100.669	0.497932	121.02	0.360792	COG1766	[N] Cell motility					PA14_50080, PA14_50100, PA14_50110, PA14_50130, PA14_50140, PA14_50160	6	flagellar biosynthesis chaperone, flagellum-specific ATP synthase, flagellar assembly protein, flagellar motor switch, flagellar MS-ring protein, flagellar hook-basal body	PA1105, PA1104, PA1103, PA1102, PA1101, PA1100	No
PA14_23560	PA14_RS09540	operon_26	1	1	essential gene	C4	set2	gltX	glutamyl-tRNA synthetase	462.197	-0.552392	322.077	-2.01087	649.975	-2.54719	COG0008	[J] Translation, ribosomal structure and biogenesis	essential gene	essential gene	essential gene	Core	PA14_23560	1	NA	NA	Yes
PA14_01710	PA14_RS00705	operon_2601	1	1	non essential gene	C5	set2		alkyl hydroperoxide reductase	2559.7	-0.0704267	2518.62	-0.0471735	3127.63	-0.084056	COG0450	[O] Posttranslational modification, protein turnover, chaperones					PA14_01710	1	alkyl hydroperoxide reductase	PA0139	No
PA14_18690	PA14_RS07490	operon_2602	1	1	non essential gene	C5	set2		peroxidase	122.933	-0.0203843	120.995	0.0154397	230.61	0.432037	COG0450	[O] Posttranslational modification, protein turnover, chaperones					PA14_18690	1	putative peroxidase	PA3529	No
PA14_19490	PA14_RS07795	operon_2603	0	0	non essential gene	C5	set2		1-Cys peroxiredoxin LsfA	40.2447	-0.359716	39.5898	-0.631253	77.7155	-0.29496	COG0450	[O] Posttranslational modification, protein turnover, chaperones					PA14_19490	1	putative antioxidant protein	PA3450	No
PA14_53300	PA14_RS21700	operon_2604	1	0	non essential gene	C5	set2		alkyl hydroperoxide reductase	85.3008	-0.203612	82.4132	-0.12716	210.707	-0.00740007	COG0450	[O] Posttranslational modification, protein turnover, chaperones					PA14_53300	1	alkyl hydroperoxide reductase	PA0848	No
PA14_42440	PA14_RS17220	operon_2605	1	1	non essential gene	C5	set2	popD	translocator outer membrane protein PopD precursor	782.605	-0.120654	706.739	-0.446421	812.535	-0.58537	2CD72	[S] Function unknown					PA14_42440, PA14_42450, PA14_42460, PA14_42470, PA14_42480, PA14_42490, PA14_42500, PA14_42510, PA14_42520, PA14_42530, PA14_42540, PA14_42550	12	translocator outer membrane, translocator protein PopB, regulatory protein PcrH, type III secretion, regulator in type, transcriptional regulator protein, type III secretory, hypothetical protein, hypothetical protein, putative type III, putative protein in, Type III secretion	PA1709, PA1708, PA1707, PA1706, PA1705, PA1704, PA1703, PA1702, PA1701, PA1700, PA1699, PA1698	No
PA14_42450	PA14_RS17225	operon_2605	1	1	non essential gene	C5	set2	popB	translocator protein PopB	955.165	0.0890178	977.633	0.05255	1209.47	0.101026	COG5613	[S] Function unknown		essential gene			PA14_42440, PA14_42450, PA14_42460, PA14_42470, PA14_42480, PA14_42490, PA14_42500, PA14_42510, PA14_42520, PA14_42530, PA14_42540, PA14_42550	12	translocator outer membrane, translocator protein PopB, regulatory protein PcrH, type III secretion, regulator in type, transcriptional regulator protein, type III secretory, hypothetical protein, hypothetical protein, putative type III, putative protein in, Type III secretion	PA1709, PA1708, PA1707, PA1706, PA1705, PA1704, PA1703, PA1702, PA1701, PA1700, PA1699, PA1698	No
PA14_42470	PA14_RS17235	operon_2605	1	0	non essential gene	C5	set2	pcrV	type III secretion protein PcrV	191.753	0.198509	186.199	0.10066	213.628	-0.00153639	298H3	[S] Function unknown					PA14_42440, PA14_42450, PA14_42460, PA14_42470, PA14_42480, PA14_42490, PA14_42500, PA14_42510, PA14_42520, PA14_42530, PA14_42540, PA14_42550	12	translocator outer membrane, translocator protein PopB, regulatory protein PcrH, type III secretion, regulator in type, transcriptional regulator protein, type III secretory, hypothetical protein, hypothetical protein, putative type III, putative protein in, Type III secretion	PA1709, PA1708, PA1707, PA1706, PA1705, PA1704, PA1703, PA1702, PA1701, PA1700, PA1699, PA1698	No
PA14_42480	PA14_RS17240	operon_2605	1	1	non essential gene	C5	set2	pcrG	regulator in type III secretion	492.294	-0.0219016	519.144	0.139792	718.008	0.236983	2ERMU	[S] Function unknown					PA14_42440, PA14_42450, PA14_42460, PA14_42470, PA14_42480, PA14_42490, PA14_42500, PA14_42510, PA14_42520, PA14_42530, PA14_42540, PA14_42550	12	translocator outer membrane, translocator protein PopB, regulatory protein PcrH, type III secretion, regulator in type, transcriptional regulator protein, type III secretory, hypothetical protein, hypothetical protein, putative type III, putative protein in, Type III secretion	PA1709, PA1708, PA1707, PA1706, PA1705, PA1704, PA1703, PA1702, PA1701, PA1700, PA1699, PA1698	No
PA14_25280	PA14_RS10245	operon_2607	1	1	non essential gene	C5	set2	nqrA	Na(+)-translocating NADH-quinone reductase subunit A	203.095	-0.166704	170.305	-0.466928	329.241	-0.671674	COG1726	[C] Energy production and conversion					PA14_25280, PA14_25305, PA14_25320, PA14_25330, PA14_25340, PA14_25350, PA14_25360, PA14_25370	8	Na(+)-translocating NADH-quinone reductase, Na(+)-translocating NADH-quinone reductase, Na(+)-translocating NADH-quinone reductase, Na(+)-translocating NADH-quinone reductase, Na(+)-translocating NADH-quinone reductase, Na(+)-translocating NADH-quinone reductase, putative thiamine biosynthesis, hypothetical protein	PA2999, PA2998, PA2997, PA2996, PA2995, PA2994, PA2993, PA2992	No
PA14_25305	PA14_RS10250	operon_2607	1	1	non essential gene	C5	set2	nqrB	Na(+)-translocating NADH-quinone reductase subunit B	452.04	0.0582232	440.925	0.0266236	661.555	0.0693118	COG1805	[C] Energy production and conversion					PA14_25280, PA14_25305, PA14_25320, PA14_25330, PA14_25340, PA14_25350, PA14_25360, PA14_25370	8	Na(+)-translocating NADH-quinone reductase, Na(+)-translocating NADH-quinone reductase, Na(+)-translocating NADH-quinone reductase, Na(+)-translocating NADH-quinone reductase, Na(+)-translocating NADH-quinone reductase, Na(+)-translocating NADH-quinone reductase, putative thiamine biosynthesis, hypothetical protein	PA2999, PA2998, PA2997, PA2996, PA2995, PA2994, PA2993, PA2992	No
PA14_25320	PA14_RS10255	operon_2607	1	1	non essential gene	C5	set2	nqrC	Na(+)-translocating NADH-quinone reductase subunit C	688.473	-0.136945	665.196	-0.127865	1010.19	-0.150961	COG2869	[C] Energy production and conversion					PA14_25280, PA14_25305, PA14_25320, PA14_25330, PA14_25340, PA14_25350, PA14_25360, PA14_25370	8	Na(+)-translocating NADH-quinone reductase, Na(+)-translocating NADH-quinone reductase, Na(+)-translocating NADH-quinone reductase, Na(+)-translocating NADH-quinone reductase, Na(+)-translocating NADH-quinone reductase, Na(+)-translocating NADH-quinone reductase, putative thiamine biosynthesis, hypothetical protein	PA2999, PA2998, PA2997, PA2996, PA2995, PA2994, PA2993, PA2992	No
PA14_25330	PA14_RS10260	operon_2607	1	1	non essential gene	C5	set2	nqrD	Na(+)-translocating NADH-quinone reductase subunit D	1444.73	-0.0665929	1360.28	-0.164274	3082	-0.100259	COG1347	[C] Energy production and conversion					PA14_25280, PA14_25305, PA14_25320, PA14_25330, PA14_25340, PA14_25350, PA14_25360, PA14_25370	8	Na(+)-translocating NADH-quinone reductase, Na(+)-translocating NADH-quinone reductase, Na(+)-translocating NADH-quinone reductase, Na(+)-translocating NADH-quinone reductase, Na(+)-translocating NADH-quinone reductase, Na(+)-translocating NADH-quinone reductase, putative thiamine biosynthesis, hypothetical protein	PA2999, PA2998, PA2997, PA2996, PA2995, PA2994, PA2993, PA2992	No
PA14_25340	PA14_RS10265	operon_2607	1	1	non essential gene	C5	set2	nqrE	Na(+)-translocating NADH-quinone reductase subunit E	751.203	-0.00674259	750.821	-0.140529	964.092	-0.162079	COG2209	[C] Energy production and conversion					PA14_25280, PA14_25305, PA14_25320, PA14_25330, PA14_25340, PA14_25350, PA14_25360, PA14_25370	8	Na(+)-translocating NADH-quinone reductase, Na(+)-translocating NADH-quinone reductase, Na(+)-translocating NADH-quinone reductase, Na(+)-translocating NADH-quinone reductase, Na(+)-translocating NADH-quinone reductase, Na(+)-translocating NADH-quinone reductase, putative thiamine biosynthesis, hypothetical protein	PA2999, PA2998, PA2997, PA2996, PA2995, PA2994, PA2993, PA2992	No
PA14_25350	PA14_RS10270	operon_2607	0	1	non essential gene	C5	set2	nqrF	Na(+)-translocating NADH-quinone reductase subunit F	161.273	-0.229487	154.019	-0.0882142	331.333	-0.0263947	COG2871	[C] Energy production and conversion					PA14_25280, PA14_25305, PA14_25320, PA14_25330, PA14_25340, PA14_25350, PA14_25360, PA14_25370	8	Na(+)-translocating NADH-quinone reductase, Na(+)-translocating NADH-quinone reductase, Na(+)-translocating NADH-quinone reductase, Na(+)-translocating NADH-quinone reductase, Na(+)-translocating NADH-quinone reductase, Na(+)-translocating NADH-quinone reductase, putative thiamine biosynthesis, hypothetical protein	PA2999, PA2998, PA2997, PA2996, PA2995, PA2994, PA2993, PA2992	No
PA14_17130	PA14_RS06875	operon_2609	1	1	essential gene	C4	set2	dxr	1-deoxy-D-xylulose 5-phosphate reductoisomerase	265.356	-0.612348	221.988	-1.29457	369.447	-1.35684	COG0743	[I] Lipid transport and metabolism	essential gene	essential gene	essential gene	Core	PA14_17100, PA14_17110, PA14_17120, PA14_17130, PA14_17140, PA14_17150	6	ribosome recycling factor, undecaprenyl pyrophosphate synthetase, phosphatidate cytidylyltransferase, 1-deoxy-D-xylulose 5-phosphate, putative membrane-associated zinc, putative outer membrane	PA3653, PA3652, PA3651, PA3650, PA3649, PA3648	Yes
PA14_14710	PA14_RS05870	operon_2612	1	0	essential gene	C3	set1		Rrf2 family protein	746.395	-1.1795	384.273	-1.80231	162.096	-1.6228	COG1959	[K] Transcription		essential gene			PA14_14710	1	putative Rrf2 family	PA3815	No
PA14_14730	PA14_RS05875	operon_2612	1	0	essential gene	C1	set1	iscS	cysteine desulfurase	130.495	-3.30602	87.0737	-9.8624	48.6055	-7.46236	COG1104	[E] Amino acid transport and metabolism		essential gene	essential gene	Core	PA14_14730	1	cysteine desulfurase	PA3814	Yes
PA14_14740	PA14_RS05880	operon_2612	0	1	non essential gene	C5	set2		scaffold protein	305.453	-0.00118816	339.483	0.101814	696.728	0.354963	COG0822	[C] Energy production and conversion	essential gene	essential gene			PA14_14740, PA14_14750, PA14_14770, PA14_14780	4	scaffold protein, putative iron-binding protein, co-chaperone HscB, chaperone protein HscA	PA3813, PA3812, PA3811, PA3810	Yes
PA14_49220	PA14_RS19990	operon_2613	1	1	non essential gene	C5	set2	napF	ferredoxin protein NapF	357.943	0.0759961	341.061	0.225805	877.884	0.250576	COG1145	[C] Energy production and conversion		essential gene			PA14_49210, PA14_49220, PA14_49230, PA14_49250, PA14_49260, PA14_49270	6	periplasmic nitrate reductase, ferredoxin protein NapF, NapD protein of, nitrate reductase catalytic, cytochrome c-type protein, cytochrome c-type protein	PA1177, PA1176, PA1175, PA1174, PA1173, PA1172	No
PA14_49230	PA14_RS19995	operon_2613	1	1	non essential gene	C5	set2	napD	NapD protein of periplasmic nitrate reductase	192.198	-0.0987464	201.912	0.0182361	351.643	0.114264	COG3062	[P] Inorganic ion transport and metabolism		essential gene			PA14_49210, PA14_49220, PA14_49230, PA14_49250, PA14_49260, PA14_49270	6	periplasmic nitrate reductase, ferredoxin protein NapF, NapD protein of, nitrate reductase catalytic, cytochrome c-type protein, cytochrome c-type protein	PA1177, PA1176, PA1175, PA1174, PA1173, PA1172	No
PA14_49250	PA14_RS20000	operon_2613	0	1	non essential gene	C5	set2	napA	nitrate reductase catalytic subunit	434.851	0.199513	456.587	0.197528	603.53	0.382093	COG0243	[C] Energy production and conversion					PA14_49210, PA14_49220, PA14_49230, PA14_49250, PA14_49260, PA14_49270	6	periplasmic nitrate reductase, ferredoxin protein NapF, NapD protein of, nitrate reductase catalytic, cytochrome c-type protein, cytochrome c-type protein	PA1177, PA1176, PA1175, PA1174, PA1173, PA1172	No
PA14_49260	PA14_RS20005	operon_2613	0	0	non essential gene	C5	set2	napB	cytochrome c-type protein NapB precursor	88.9424	0.188787	102.89	0.425453	131.608	0.665949	COG3043	[C] Energy production and conversion					PA14_49210, PA14_49220, PA14_49230, PA14_49250, PA14_49260, PA14_49270	6	periplasmic nitrate reductase, ferredoxin protein NapF, NapD protein of, nitrate reductase catalytic, cytochrome c-type protein, cytochrome c-type protein	PA1177, PA1176, PA1175, PA1174, PA1173, PA1172	No
PA14_44340	PA14_RS18010	operon_2615	1	1	non essential gene	C5	set2		cbb3-type cytochrome c oxidase subunit I	546.033	0.02337	505.149	-0.16756	579.631	-0.0914098	COG3278	[C] Energy production and conversion					PA14_44340, PA14_44350, PA14_44360	3	putative cytochrome oxidase, putative cytochrome c, putative cytochrome c	PA1557, PA1556, PA1555	No
PA14_44350	PA14_RS18015	operon_2615	1	1	non essential gene	C5	set2		cbb3-type cytochrome c oxidase subunit II	1327.44	0.0350563	1395.12	-0.00235029	1624.99	-0.00444598	COG2993	[C] Energy production and conversion					PA14_44340, PA14_44350, PA14_44360	3	putative cytochrome oxidase, putative cytochrome c, putative cytochrome c	PA1557, PA1556, PA1555	No
PA14_44360	PA14_RS18025	operon_2615	0	1	non essential gene	C5	set2		cytochrome c oxidase, cbb3-type subunit III	501.144	-0.171063	477.281	-0.214665	775.478	-0.169243	COG2010	[C] Energy production and conversion					PA14_44340, PA14_44350, PA14_44360	3	putative cytochrome oxidase, putative cytochrome c, putative cytochrome c	PA1557, PA1556, PA1555	No
PA14_44370	PA14_RS18030	operon_2616	1	1	essential gene	C4	set1		cbb3-type cytochrome c oxidase subunit I	687.458	-0.557677	563.491	-0.837173	335.599	-1.32195	COG3278	[C] Energy production and conversion		essential gene		Conditional	PA14_44370, PA14_44380, PA14_44390, PA14_44400	4	cytochrome oxidase subunit, putative cytochrome c, NA, putative cytochrome c	PA1554, PA1553, NA, PA1552	Yes
PA14_44380	PA14_RS18035	operon_2616	1	1	non essential gene	C5	set2		cbb3-type cytochrome c oxidase subunit II	254.905	0.0283666	266.313	0.125662	483.285	0.235499	COG2993	[C] Energy production and conversion					PA14_44370, PA14_44380, PA14_44390, PA14_44400	4	cytochrome oxidase subunit, putative cytochrome c, NA, putative cytochrome c	PA1554, PA1553, NA, PA1552	Yes
PA14_44400	PA14_RS18045	operon_2616	1	1	essential gene	C4	set1		cytochrome c oxidase, cbb3-type subunit III	782.734	-0.33476	490.036	-0.704886	248.435	-1.02093	COG2010	[C] Energy production and conversion		essential gene			PA14_44370, PA14_44380, PA14_44390, PA14_44400	4	cytochrome oxidase subunit, putative cytochrome c, NA, putative cytochrome c	PA1554, PA1553, NA, PA1552	Yes
PA14_30380	PA14_RS12385	operon_2619	0	1	essential gene	C4	set1		hypothetical protein	230.442	-0.45131	112.833	-0.960816	32.5191	-1.81155	COG2168	[P] Inorganic ion transport and metabolism	essential gene	essential gene		Core	PA14_30370, PA14_30380, PA14_30390, PA14_30400	4	hypothetical protein, hypothetical protein, sulfur relay protein, sulfur transfer complex	PA2608, PA2607, PA2606, PA2605	Yes
PA14_30390	PA14_RS12390	operon_2619	1	1	essential gene	C4	set2		sulfur relay protein TusC	555.032	-0.606414	434.417	-1.09181	1075.23	-0.981122	COG2923	[P] Inorganic ion transport and metabolism	essential gene	essential gene	essential gene	Core	PA14_30370, PA14_30380, PA14_30390, PA14_30400	4	hypothetical protein, hypothetical protein, sulfur relay protein, sulfur transfer complex	PA2608, PA2607, PA2606, PA2605	Yes
PA14_15780	PA14_RS06315	operon_262	1	1	non essential gene	C5	set2		PTS system N-acetylglucosamine-specific IIBC component	313.52	0.165152	312.927	0.32913	703.829	0.483173	COG1263	[G] Carbohydrate transport and metabolism					PA14_15780, PA14_15790, PA14_15810, PA14_15820, PA14_15830	5	PTS system N-acetylglucosamine-specific, putative phosphoenolpyruvate-protein, putative aminotransferase, putative N-acetylglucosamine-6-phosphate, GntR family transcriptional	PA3761, PA3760, PA3759, PA3758, PA3757	No
PA14_60370	PA14_RS24655	operon_2623	1	1	non essential gene	C5	set2	ileS	isoleucyl-tRNA synthetase	173.914	-0.184004	150.068	0.0329148	233.884	0.479507	COG0060	[J] Translation, ribosomal structure and biogenesis	essential gene		essential gene	Core	PA14_60350, PA14_60360, PA14_60370, PA14_60380	4	peptidyl-prolyl cis-trans isomerase,, lipoprotein signal peptidase, isoleucyl-tRNA synthetase, bifunctional riboflavin kinase/FMN	PA4558, PA4559, PA4560, PA4561	Yes
PA14_60380	PA14_RS24660	operon_2623	1	1	essential gene	C3	set1	ribF	bifunctional riboflavin kinase/FMN adenylyltransferase	965.82	-1.17893	557.595	-1.20727	180.464	-1.0337	COG0196	[H] Coenzyme transport and metabolism			essential gene	Core	PA14_60350, PA14_60360, PA14_60370, PA14_60380	4	peptidyl-prolyl cis-trans isomerase,, lipoprotein signal peptidase, isoleucyl-tRNA synthetase, bifunctional riboflavin kinase/FMN	PA4558, PA4559, PA4560, PA4561	Yes
PA14_50080	PA14_RS20345	operon_2626	1	1	non essential gene	C5	set2	fliJ	flagellar biosynthesis chaperone	375.966	0.0494609	394.661	0.247345	635.71	0.297879	COG2882	[N] Cell motility					PA14_50080, PA14_50100, PA14_50110, PA14_50130, PA14_50140, PA14_50160	6	flagellar biosynthesis chaperone, flagellum-specific ATP synthase, flagellar assembly protein, flagellar motor switch, flagellar MS-ring protein, flagellar hook-basal body	PA1105, PA1104, PA1103, PA1102, PA1101, PA1100	No
PA14_50100	PA14_RS20350	operon_2626	1	1	non essential gene	C5	set2	fliI	flagellum-specific ATP synthase	462.298	0.151148	479.789	0.428691	656.143	0.604302	COG1157	[N] Cell motility					PA14_50080, PA14_50100, PA14_50110, PA14_50130, PA14_50140, PA14_50160	6	flagellar biosynthesis chaperone, flagellum-specific ATP synthase, flagellar assembly protein, flagellar motor switch, flagellar MS-ring protein, flagellar hook-basal body	PA1105, PA1104, PA1103, PA1102, PA1101, PA1100	No
PA14_50100	PA14_RS20350	operon_2626	1	1	non essential gene	C5	set2	fliI	flagellum-specific ATP synthase	462.298	0.151148	479.789	0.428691	656.143	0.604302	COG1157	[U] Intracellular trafficking, secretion, and vesicular transport					PA14_50080, PA14_50100, PA14_50110, PA14_50130, PA14_50140, PA14_50160	6	flagellar biosynthesis chaperone, flagellum-specific ATP synthase, flagellar assembly protein, flagellar motor switch, flagellar MS-ring protein, flagellar hook-basal body	PA1105, PA1104, PA1103, PA1102, PA1101, PA1100	No
PA14_50110	PA14_RS20355	operon_2626	1	1	non essential gene	C5	set2	fliH	flagellar assembly protein H	258.117	0.23187	262.983	0.39216	559.174	0.238753	COG1317	[N] Cell motility					PA14_50080, PA14_50100, PA14_50110, PA14_50130, PA14_50140, PA14_50160	6	flagellar biosynthesis chaperone, flagellum-specific ATP synthase, flagellar assembly protein, flagellar motor switch, flagellar MS-ring protein, flagellar hook-basal body	PA1105, PA1104, PA1103, PA1102, PA1101, PA1100	No
PA14_45590	PA14_RS18515	operon_2628	1	1	non essential gene	C5	set2		two-component sensor	241.504	0.0971603	256.651	-0.00905986	583.984	0.130285	COG0643	[T] Signal transduction mechanisms					PA14_45480, PA14_45500, PA14_45510, PA14_45520, PA14_45540, PA14_45560, PA14_45580, PA14_45590, PA14_45610, PA14_45620, PA14_45630, PA14_45640	12	hypothetical protein, putative purine-binding chemotaxis, CheW domain-containing protein, putative plasmid partitioning, flagellar motor protein, flagellar motor protein, chemotaxis-specific methylesterase, putative two-component sensor, chemotaxis protein CheZ, two-component response regulator, flagellar biosynthesis sigma, flagellar synthesis regulator	PA1465, PA1464, PA1463, PA1462, PA1461, PA1460, PA1459, PA1458, PA1457, PA1456, PA1455, PA1454	No
PA14_45610	PA14_RS18520	operon_2628	1	1	non essential gene	C5	set2	cheZ	chemotaxis protein CheZ	212.909	0.292042	230.593	0.625049	442.442	0.91199	COG3143	[T] Signal transduction mechanisms					PA14_45480, PA14_45500, PA14_45510, PA14_45520, PA14_45540, PA14_45560, PA14_45580, PA14_45590, PA14_45610, PA14_45620, PA14_45630, PA14_45640	12	hypothetical protein, putative purine-binding chemotaxis, CheW domain-containing protein, putative plasmid partitioning, flagellar motor protein, flagellar motor protein, chemotaxis-specific methylesterase, putative two-component sensor, chemotaxis protein CheZ, two-component response regulator, flagellar biosynthesis sigma, flagellar synthesis regulator	PA1465, PA1464, PA1463, PA1462, PA1461, PA1460, PA1459, PA1458, PA1457, PA1456, PA1455, PA1454	No
PA14_45610	PA14_RS18520	operon_2628	1	1	non essential gene	C5	set2	cheZ	chemotaxis protein CheZ	212.909	0.292042	230.593	0.625049	442.442	0.91199	COG3143	[N] Cell motility					PA14_45480, PA14_45500, PA14_45510, PA14_45520, PA14_45540, PA14_45560, PA14_45580, PA14_45590, PA14_45610, PA14_45620, PA14_45630, PA14_45640	12	hypothetical protein, putative purine-binding chemotaxis, CheW domain-containing protein, putative plasmid partitioning, flagellar motor protein, flagellar motor protein, chemotaxis-specific methylesterase, putative two-component sensor, chemotaxis protein CheZ, two-component response regulator, flagellar biosynthesis sigma, flagellar synthesis regulator	PA1465, PA1464, PA1463, PA1462, PA1461, PA1460, PA1459, PA1458, PA1457, PA1456, PA1455, PA1454	No
PA14_45620	PA14_RS18525	operon_2628	1	1	non essential gene	C5	set2	cheY	two-component response regulator CheY	347.027	0.0228311	329.47	0.00485386	666.831	0.0511415	COG0745	[T] Signal transduction mechanisms	essential gene				PA14_45480, PA14_45500, PA14_45510, PA14_45520, PA14_45540, PA14_45560, PA14_45580, PA14_45590, PA14_45610, PA14_45620, PA14_45630, PA14_45640	12	hypothetical protein, putative purine-binding chemotaxis, CheW domain-containing protein, putative plasmid partitioning, flagellar motor protein, flagellar motor protein, chemotaxis-specific methylesterase, putative two-component sensor, chemotaxis protein CheZ, two-component response regulator, flagellar biosynthesis sigma, flagellar synthesis regulator	PA1465, PA1464, PA1463, PA1462, PA1461, PA1460, PA1459, PA1458, PA1457, PA1456, PA1455, PA1454	No
PA14_45620	PA14_RS18525	operon_2628	1	1	non essential gene	C5	set2	cheY	two-component response regulator CheY	347.027	0.0228311	329.47	0.00485386	666.831	0.0511415	COG0745	[K] Transcription	essential gene				PA14_45480, PA14_45500, PA14_45510, PA14_45520, PA14_45540, PA14_45560, PA14_45580, PA14_45590, PA14_45610, PA14_45620, PA14_45630, PA14_45640	12	hypothetical protein, putative purine-binding chemotaxis, CheW domain-containing protein, putative plasmid partitioning, flagellar motor protein, flagellar motor protein, chemotaxis-specific methylesterase, putative two-component sensor, chemotaxis protein CheZ, two-component response regulator, flagellar biosynthesis sigma, flagellar synthesis regulator	PA1465, PA1464, PA1463, PA1462, PA1461, PA1460, PA1459, PA1458, PA1457, PA1456, PA1455, PA1454	No
PA14_45350	PA14_RS18425	operon_2629	1	0	essential gene	C4	set2	ccmC	heme exporter protein CcmC	3.98906	-0.967657	1.07287	-1.88183	0.621069	-1.85065	COG0755	[U] Intracellular trafficking, secretion, and vesicular transport	essential gene	essential gene		Conditional	PA14_45260, PA14_45280, PA14_45290, PA14_45300, PA14_45310, PA14_45330, PA14_45340, PA14_45350	8	NA, cytochrome c-type biogenesis, cytochrome C-type biogenesis, cytochrome C biogenesis, cytochrome C-type biogenesis, cytochrome c-type biogenesis, putative heme exporter, heme exporter protein	NA, PA1483, PA1482, PA1481, PA1480, PA1479, PA1478, PA1477	Yes
PA14_45370	PA14_RS18430	operon_2629	1	1	essential gene	C3	set2	ccmB	heme exporter protein CcmB	1491.54	-1.03193	1153.93	-1.46343	1858.51	-1.315	COG2386	[U] Intracellular trafficking, secretion, and vesicular transport		essential gene			PA14_45370, PA14_45380	2	heme exporter protein, cytochrome c biogenesis	PA1476, PA1475	No
PA14_45380	PA14_RS18435	operon_2629	0	1	essential gene	C2	set1	ccmA	cytochrome c biogenesis protein CcmA	135.514	-1.79665	54.8677	-3.74031	32.3263	-4.18076	COG4133	[O] Posttranslational modification, protein turnover, chaperones	essential gene	essential gene			PA14_45370, PA14_45380	2	heme exporter protein, cytochrome c biogenesis	PA1476, PA1475	No
PA14_17050	PA14_RS06840	operon_263	1	1	non essential gene	C5	set2	map	methionine aminopeptidase	1186.9	-0.185665	1071.22	-0.337259	2127.86	-0.621075	COG0024	[E] Amino acid transport and metabolism					PA14_17050	1	methionine aminopeptidase	PA3657	No
PA14_01940	PA14_RS00795	operon_2631	1	1	non essential gene	C5	set2		RND efflux membrane fusion protein	4227.95	0.00500208	4224.53	0.0311015	5209.78	0.0650577	COG0845	[D] Cell cycle control, cell division, chromosome partitioning					PA14_01940, PA14_01960, PA14_01970	3	putative RND efflux, putative RND efflux, putative RND efflux	PA0156, PA0157, PA0158	No
PA14_01960	PA14_RS00800	operon_2631	1	1	essential gene	C4	set2		RND efflux membrane fusion protein	327.141	-0.234018	262.271	-0.990895	329.761	-1.74492	COG0845	[M] Cell wall/membrane/envelope biogenesis					PA14_01940, PA14_01960, PA14_01970	3	putative RND efflux, putative RND efflux, putative RND efflux	PA0156, PA0157, PA0158	No
PA14_01970	PA14_RS00805	operon_2631	1	0	non essential gene	C5	set2		RND efflux transporter	99.4222	-0.112289	96.3219	-0.389516	119.381	-0.478482	COG0841	[V] Defense mechanisms					PA14_01940, PA14_01960, PA14_01970	3	putative RND efflux, putative RND efflux, putative RND efflux	PA0156, PA0157, PA0158	No
PA14_18880	PA14_RS07570	operon_2632	1	1	non essential gene	C5	set2	nth	endonuclease III	323.983	-0.0231082	313.621	0.056963	392.76	-0.0249773	COG0177	[L] Replication, recombination and repair					PA14_18880	1	endonuclease III	PA3495	No
PA14_18890	PA14_RS07575	operon_2632	0	0	non essential gene	C5	set2		electron transport complex protein RsxE	19.038	0.715357	24.3786	0.916762	51.275	1.22854	COG4660	[C] Energy production and conversion		essential gene			PA14_18890, PA14_18900, PA14_18910, PA14_18920, PA14_18930, PA14_18950	6	electron transport complex, hypothetical protein, hypothetical protein, electron transport complex, electron transport complex, hypothetical protein	PA3494, PA3493, PA3492, PA3491, PA3490, PA3489	No
PA14_18900	PA14_RS07580	operon_2632	1	1	non essential gene	C5	set2		hypothetical protein	5812.88	-0.0450273	5976.08	0.0365135	7418.29	0.0463929	COG4659	[C] Energy production and conversion					PA14_18890, PA14_18900, PA14_18910, PA14_18920, PA14_18930, PA14_18950	6	electron transport complex, hypothetical protein, hypothetical protein, electron transport complex, electron transport complex, hypothetical protein	PA3494, PA3493, PA3492, PA3491, PA3490, PA3489	No
PA14_57540	PA14_RS23460	operon_2635	1	1	essential gene	C3	set2		cytochrome c1	811.418	-1.1785	667.029	-2.3145	661.302	-3.09263	COG2857	[C] Energy production and conversion		essential gene		Conditional	PA14_57540, PA14_57560, PA14_57570	3	putative cytochrome c1, putative cytochrome b, putative cytochrome c	PA4429, PA4430, PA4431	Yes
PA14_57560	PA14_RS23465	operon_2635	1	0	essential gene	C3	set1		cytochrome b	683.625	-1.01682	266.474	-2.25165	96.878	-3.16557	COG1290	[C] Energy production and conversion		essential gene		Conditional	PA14_57540, PA14_57560, PA14_57570	3	putative cytochrome c1, putative cytochrome b, putative cytochrome c	PA4429, PA4430, PA4431	Yes
PA14_57570	PA14_RS23470	operon_2635	1	1	essential gene	C3	set1		cytochrome c reductase, iron-sulfur subun	1055.65	-1.31115	472.209	-2.63138	143.89	-3.55926	COG0723	[C] Energy production and conversion		essential gene		Conditional	PA14_57540, PA14_57560, PA14_57570	3	putative cytochrome c1, putative cytochrome b, putative cytochrome c	PA4429, PA4430, PA4431	Yes
PA14_64090	PA14_RS26195	operon_2637	1	1	non essential gene	C5	set2	aroQ1	3-dehydroquinate dehydratase	259.701	-0.0462044	271.347	0.322719	593.049	0.417577	COG0757	[E] Amino acid transport and metabolism				Conditional	PA14_64090	1	3-dehydroquinate dehydratase	PA4846	Yes
PA14_69700	PA14_RS28410	operon_2638	1	1	non essential gene	C5	set2		hypothetical protein	6392.15	-0.204486	6001.08	-0.315484	6917.06	-0.537038	COG3159	[S] Function unknown					PA14_69660, PA14_69670, PA14_69690, PA14_69700, PA14_69710, PA14_69720	6	NA, diaminopimelate decarboxylase, diaminopimelate epimerase, hypothetical protein, NA, putative hydrolase	NA, PA5277, PA5278, PA5279, NA, PA5281	Yes
PA14_69710	PA14_RS28415	operon_2638	1	0	essential gene	C1	set1	xerC	site-specific tyrosine recombinase XerC	4592.51	-2.3023	2494.43	-4.62517	1256.78	-4.94217	COG4973	[D] Cell cycle control, cell division, chromosome partitioning		essential gene			PA14_69660, PA14_69670, PA14_69690, PA14_69700, PA14_69710, PA14_69720	6	NA, diaminopimelate decarboxylase, diaminopimelate epimerase, hypothetical protein, NA, putative hydrolase	NA, PA5277, PA5278, PA5279, NA, PA5281	Yes
PA14_69720	PA14_RS28420	operon_2638	1	1	non essential gene	C5	set2		hydrolase	368.249	-0.0923483	357.389	0.16034	826.277	-0.00859509	COG1011	[S] Function unknown					PA14_69660, PA14_69670, PA14_69690, PA14_69700, PA14_69710, PA14_69720	6	NA, diaminopimelate decarboxylase, diaminopimelate epimerase, hypothetical protein, NA, putative hydrolase	NA, PA5277, PA5278, PA5279, NA, PA5281	Yes
PA14_28590	PA14_RS11635	operon_264	1	1	non essential gene	C5	set2		methionine aminopeptidase	153.347	-0.0369722	147.789	-0.234169	253.992	-0.199799	COG0024	[E] Amino acid transport and metabolism					PA14_28580, PA14_28590	2	NA, putative methionine aminopeptidase	NA, PA2748	No
PA14_54260	PA14_RS22085	operon_2642	1	1	non essential gene	C5	set2		hypothetical protein	733.794	-0.109003	733.516	-0.0430926	830.686	-0.164852	COG4106	[S] Function unknown					PA14_54260, PA14_54270	2	hypothetical protein, hypothetical protein	PA0775, PA0774	No
PA14_54270	PA14_RS22090	operon_2642	0	1	non essential gene	C5	set2		hypothetical protein	105.825	-0.0427103	102.646	-0.294545	254.738	-0.457012	COG0500	[J] Translation, ribosomal structure and biogenesis					PA14_54260, PA14_54270	2	hypothetical protein, hypothetical protein	PA0775, PA0774	No
PA14_00440	PA14_RS00180	operon_2643	1	1	non essential gene	C5	set2	trpA	tryptophan synthase subunit alpha	510.672	-0.178919	488	-0.23954	891.816	-0.354953	COG0159	[E] Amino acid transport and metabolism				Conditional	PA14_00440, PA14_00450	2	tryptophan synthase subunit, tryptophan synthase subunit	PA0035, PA0036	Yes
PA14_00450	PA14_RS00185	operon_2643	1	1	non essential gene	C5	set2	trpB	tryptophan synthase subunit beta	396.109	0.0954319	392.503	0.124983	966.077	0.205733	COG0133	[E] Amino acid transport and metabolism				Conditional	PA14_00440, PA14_00450	2	tryptophan synthase subunit, tryptophan synthase subunit	PA0035, PA0036	Yes
PA14_51770	PA14_RS21065	operon_2644	1	0	non essential gene	C5	set2		hypothetical protein	141.619	0.0993828	129.209	-0.0440614	197.301	0.113164	COG0824	[S] Function unknown					PA14_51720, PA14_51730, PA14_51740, PA14_51750, PA14_51770	5	translocation protein TolB, TolA protein, TolR protein, TolQ protein, hypothetical protein	PA0972, PA0971, PA0970, PA0969, PA0968	Yes
PA14_43270	PA14_RS17580	operon_2645	1	1	non essential gene	C5	set2		tRNA 2-selenouridine synthase	432.437	-0.0608901	399.708	-0.209922	597.899	-0.353709	COG2603	[H] Coenzyme transport and metabolism					PA14_43270, PA14_43280	2	tRNA 2-selenouridine synthase, selenophosphate synthetase	PA1643, PA1642	No
PA14_43280	PA14_RS17585	operon_2645	0	1	non essential gene	C5	set2	selD	selenophosphate synthetase	189.049	0.25247	195.877	0.362375	335.836	0.384988	COG0709	[F] Nucleotide transport and metabolism					PA14_43270, PA14_43280	2	tRNA 2-selenouridine synthase, selenophosphate synthetase	PA1643, PA1642	No
PA14_69690	PA14_RS28405	operon_2648	1	1	non essential gene	C5	set2	dapF	diaminopimelate epimerase	1891.66	0.228123	1994.18	0.373148	2678.66	0.560758	COG0253	[E] Amino acid transport and metabolism			essential gene	Core	PA14_69660, PA14_69670, PA14_69690, PA14_69700, PA14_69710, PA14_69720	6	NA, diaminopimelate decarboxylase, diaminopimelate epimerase, hypothetical protein, NA, putative hydrolase	NA, PA5277, PA5278, PA5279, NA, PA5281	Yes
PA14_73170	PA14_RS29790	operon_2649	1	0	non essential gene	C5	set2	glmS	glucosamine--fructose-6-phosphate aminotransferase	60.4465	0.087292	52.1365	-0.27228	103.195	-0.378087	COG0449	[M] Cell wall/membrane/envelope biogenesis	essential gene	essential gene	essential gene	Core	PA14_73170	1	glucosamine--fructose-6-phosphate	PA5549	Yes
PA14_00360	PA14_RS00150	operon_265	1	1	non essential gene	C5	set2		hypothetical protein	1731.51	0.197834	1885.69	0.384768	3202.57	0.502061	COG2113	[E] Amino acid transport and metabolism					PA14_00340, PA14_00360, PA14_00380	3	putative sulfate transporter, hypothetical protein, choline sulfatase	PA0029, PA0030, PA0031	No
PA14_72520	PA14_RS29525	operon_2650	1	1	non essential gene	C5	set2		hypothetical protein	9910.09	-0.100181	9530.99	-0.0907653	10892.2	-0.160774	COG0209	[F] Nucleotide transport and metabolism					PA14_72520	1	hypothetical protein	PA5496	No
PA14_72540	PA14_RS29530	operon_2650	1	1	non essential gene	C5	set2		ribonucleotide reductase	264.066	0.0334929	242.096	-0.0584899	467.027	-0.114755	COG0209	[F] Nucleotide transport and metabolism					PA14_72540	1	putative ribonucleotide reductase	PA5497	No
PA14_00090	PA14_RS00040	operon_2651	1	1	essential gene	C1	set1	glyS	glycyl-tRNA synthetase subunit beta	248.086	-2.74077	135.24	-6.61401	74.3666	-9.50745	COG0751	[J] Translation, ribosomal structure and biogenesis	essential gene	essential gene	essential gene	Core	PA14_00090, PA14_00100	2	glycyl-tRNA synthetase subunit, glycyl-tRNA synthetase subunit	PA0008, PA0009	Yes
PA14_66970	PA14_RS27330	operon_2652	1	1	non essential gene	C5	set2	tatB	sec-independent translocase	572.931	-0.172196	516.346	-0.501602	793.298	-0.833769	COG1826	[U] Intracellular trafficking, secretion, and vesicular transport	essential gene	essential gene			PA14_66940, PA14_66950, PA14_66960, PA14_66970, PA14_66980, PA14_66990	6	phosphoribosyl-AMP cyclohydrolase, phosphoribosyl-ATP pyrophosphatase, twin arginine translocase, sec-independent translocase, sec-independent protein translocase, 16S ribosomal RNA	PA5066, PA5067, PA5068, PA5069, PA5070, PA5071	Yes
PA14_22330	PA14_RS09040	operon_266	1	0	non essential gene	C5	set2		glycine betaine-binding protein	3.98933	-0.964521	5.60839	-0.0482009	4.77572	-1.46487	COG2113	[E] Amino acid transport and metabolism					PA14_22330	1	putative glycine betaine-binding	PA3236	No
PA14_65700	PA14_RS26830	operon_2663	1	1	essential gene	C1	set1		hypothetical protein	272.814	-2.05372	142.47	-4.68093	97.3935	-7.18352	COG3151	[S] Function unknown					PA14_65700, PA14_65710	2	hypothetical protein, adenosine diphosphate sugar	PA4970, PA4971	No
PA14_01010	PA14_RS00420	operon_2665	0	1	non essential gene	C5	set2	hsiB1	HsiB1	1082.79	0.00665929	1131.64	0.184223	1378.55	0.204011	COG3516	[S] Function unknown					PA14_01010, PA14_01020	2	hypothetical protein, hypothetical protein	PA0083, PA0084	No
PA14_01020	PA14_RS00425	operon_2665	1	0	non essential gene	C5	set2	hsiC1	HsiC1	199.054	0.14167	212.727	0.360427	292.588	0.545949	COG3517	[S] Function unknown					PA14_01010, PA14_01020	2	hypothetical protein, hypothetical protein	PA0083, PA0084	No
PA14_34050	PA14_RS13890	operon_2666	1	1	essential gene	C4	set1	hsiC3	HsiC3	1244.62	-0.298504	749.493	-0.62958	464.018	-1.19182	COG3517	[S] Function unknown					PA14_33940, PA14_33960, PA14_33970, PA14_33980, PA14_33990, PA14_34000, PA14_34010, PA14_34020, PA14_34030, PA14_34050, PA14_34070	11	hypothetical protein, hypothetical protein, NA, NA, putative ClpA/B-type protease, hypothetical protein, hypothetical protein, hypothetical protein, hypothetical protein, hypothetical protein, hypothetical protein	PA2374, PA2373, NA, NA, PA2371, PA2370, PA2369, PA2368, PA2367, PA2366, PA2365	No
PA14_34070	PA14_RS13895	operon_2666	1	1	non essential gene	C5	set2	hsiB3	HsiB3	511.499	0.300006	568.548	0.508357	719.215	0.881147	COG3516	[S] Function unknown		essential gene			PA14_33940, PA14_33960, PA14_33970, PA14_33980, PA14_33990, PA14_34000, PA14_34010, PA14_34020, PA14_34030, PA14_34050, PA14_34070	11	hypothetical protein, hypothetical protein, NA, NA, putative ClpA/B-type protease, hypothetical protein, hypothetical protein, hypothetical protein, hypothetical protein, hypothetical protein, hypothetical protein	PA2374, PA2373, NA, NA, PA2371, PA2370, PA2369, PA2368, PA2367, PA2366, PA2365	No
PA14_67300	PA14_RS27460	operon_267	0	0	non essential gene	C5	set2		ABC transporter substrate-binding protein	49.3368	0.293186	50.8659	0.570895	119.654	0.518658	COG2113	[E] Amino acid transport and metabolism					PA14_67240, PA14_67250, PA14_67260, PA14_67270, PA14_67280, PA14_67300	6	N-formylglutamate amidohydrolase, imidazolonepropionase, putative histidine/phenylalanine ammonia-lyase, putative ATP-binding component, ABC transporter permease, putative binding protein	PA5091, PA5092, PA5093, PA5094, PA5095, PA5096	No
PA14_11420	PA14_RS04620	operon_2670	1	1	non essential gene	C5	set2	ribB	bifunctional 3,4-dihydroxy-2-butanone 4-phosphate synthase/GTP cyclohydrolase II-like protein	966.413	0.0780442	938.475	0.185728	1198.22	0.123448	COG0108	[H] Coenzyme transport and metabolism					PA14_11410, PA14_11420	2	riboflavin synthase subunit, bifunctional 3,4-dihydroxy-2-butanone	PA4055, PA4054	Yes
PA14_11560	PA14_RS04675	operon_2671	1	1	non essential gene	C5	set2	ispA	geranyltranstransferase	1013.83	-0.280272	882.024	-0.497867	1004.66	-0.824816	COG0142	[H] Coenzyme transport and metabolism		essential gene	essential gene	Conditional	PA14_11560, PA14_11570	2	geranyltranstransferase, exodeoxyribonuclease VII small	PA4043, PA4042	Yes
PA14_25360	PA14_RS10275	operon_2672	0	1	non essential gene	C5	set2		thiamine biosynthesis lipoprotein	1926.16	-0.0768941	1806.96	-0.0819391	2739.04	-0.135233	COG1477	[H] Coenzyme transport and metabolism					PA14_25280, PA14_25305, PA14_25320, PA14_25330, PA14_25340, PA14_25350, PA14_25360, PA14_25370	8	Na(+)-translocating NADH-quinone reductase, Na(+)-translocating NADH-quinone reductase, Na(+)-translocating NADH-quinone reductase, Na(+)-translocating NADH-quinone reductase, Na(+)-translocating NADH-quinone reductase, Na(+)-translocating NADH-quinone reductase, putative thiamine biosynthesis, hypothetical protein	PA2999, PA2998, PA2997, PA2996, PA2995, PA2994, PA2993, PA2992	No
PA14_25370	PA14_RS10280	operon_2672	1	1	non essential gene	C5	set2		hypothetical protein	243.15	-0.0766348	227.286	-0.0643725	378.042	-0.222634	COG2991	[S] Function unknown					PA14_25280, PA14_25305, PA14_25320, PA14_25330, PA14_25340, PA14_25350, PA14_25360, PA14_25370	8	Na(+)-translocating NADH-quinone reductase, Na(+)-translocating NADH-quinone reductase, Na(+)-translocating NADH-quinone reductase, Na(+)-translocating NADH-quinone reductase, Na(+)-translocating NADH-quinone reductase, Na(+)-translocating NADH-quinone reductase, putative thiamine biosynthesis, hypothetical protein	PA2999, PA2998, PA2997, PA2996, PA2995, PA2994, PA2993, PA2992	No
PA14_20750	PA14_RS08340	operon_2673	0	0	non essential gene	C5	set2		chemotaxis protein	59.4313	0.380088	64.4455	-0.20363	137.277	0.170158	COG0784	[N] Cell motility					PA14_20750, PA14_20760	2	putative chemotaxis protein, putative chemotaxis protein	PA3349, PA3348	No
PA14_20750	PA14_RS08340	operon_2673	0	0	non essential gene	C5	set2		chemotaxis protein	59.4313	0.380088	64.4455	-0.20363	137.277	0.170158	COG0784	[T] Signal transduction mechanisms					PA14_20750, PA14_20760	2	putative chemotaxis protein, putative chemotaxis protein	PA3349, PA3348	No
PA14_20760	PA14_RS08345	operon_2673	1	1	non essential gene	C5	set2		chemotaxis protein methyltransferase	2788.74	0.110265	2812.34	0.133375	4831.09	0.126483	COG1352	[N] Cell motility					PA14_20750, PA14_20760	2	putative chemotaxis protein, putative chemotaxis protein	PA3349, PA3348	No
PA14_20760	PA14_RS08345	operon_2673	1	1	non essential gene	C5	set2		chemotaxis protein methyltransferase	2788.74	0.110265	2812.34	0.133375	4831.09	0.126483	COG1352	[T] Signal transduction mechanisms					PA14_20750, PA14_20760	2	putative chemotaxis protein, putative chemotaxis protein	PA3349, PA3348	No
PA14_50270	PA14_RS20400	operon_2675	1	0	non essential gene	C5	set2	fliD	flagellar capping protein FliD	99.9235	0.260587	112.869	0.557678	163.851	1.10302	COG1345	[N] Cell motility					PA14_50270	1	flagellar capping protein	PA1094	No
PA14_50280	PA14_RS20405	operon_2675	1	1	non essential gene	C5	set2		hypothetical protein	623.7	0.0756814	597.112	0.136366	817.959	0.16268	COG1334	[N] Cell motility					PA14_50280	1	hypothetical protein	PA1093	No
PA14_42640	PA14_RS17310	operon_2676	1	1	non essential gene	C5	set2	pscT	translocation protein in type III secretion	228.362	0.0112721	243.71	0.117792	375.357	0.190286	COG4791	[U] Intracellular trafficking, secretion, and vesicular transport					PA14_42570, PA14_42580, PA14_42600, PA14_42610, PA14_42620, PA14_42630, PA14_42640, PA14_42660	8	type III secretion, translocation protein in, translocation protein in, type III secretion, type III secretion, putative translocation protein, translocation protein in, translocation protein in	PA1697, PA1696, PA1695, PA1694, PA1693, PA1692, PA1691, PA1690	No
PA14_42660	PA14_RS17315	operon_2676	1	1	non essential gene	C5	set2	pscU	translocation protein in type III secretion	206.029	-0.0354928	227.421	0.0323987	264.572	0.10858	COG4792	[U] Intracellular trafficking, secretion, and vesicular transport					PA14_42570, PA14_42580, PA14_42600, PA14_42610, PA14_42620, PA14_42630, PA14_42640, PA14_42660	8	type III secretion, translocation protein in, translocation protein in, type III secretion, type III secretion, putative translocation protein, translocation protein in, translocation protein in	PA1697, PA1696, PA1695, PA1694, PA1693, PA1692, PA1691, PA1690	No
PA14_45720	PA14_RS18560	operon_2677	1	1	non essential gene	C5	set2	flhB	flagellar biosynthesis protein FlhB	3381.77	0.16273	3755.83	0.324062	5436.34	0.331816	COG1377	[N] Cell motility					PA14_45720, PA14_45740, PA14_45760	3	flagellar biosynthesis protein, flagellar biosynthesis protein, flagellar biosynthesis protein	PA1449, PA1448, PA1447	No
PA14_67400	PA14_RS27495	operon_268	1	0	non essential gene	C5	set2		ABC transporter substrate-binding protein	54.1972	0.613349	64.5679	0.258288	161.401	0.609481	COG2113	[E] Amino acid transport and metabolism					PA14_67380, PA14_67400	2	putative fatty acid, putative ABC transporter,	PA5102, PA5103	No
PA14_13230	PA14_RS05320	operon_2684	1	1	non essential gene	C5	set2	moaC	molybdenum cofactor biosynthesis protein MoaC	541.918	-0.202438	504.469	-0.12797	1111.2	-0.389855	COG0315	[H] Coenzyme transport and metabolism					PA14_13230, PA14_13240, PA14_13250	3	molybdenum cofactor biosynthesis, molybdopterin converting factor,, molybdopterin converting factor,	PA3918, PA3917, PA3916	No
PA14_13240	PA14_RS05325	operon_2684	1	0	non essential gene	C5	set2	moaD	molybdopterin converting factor, small subunit	140.927	0.028149	143.344	0.1924	168.2	0.247733	COG1977	[H] Coenzyme transport and metabolism					PA14_13230, PA14_13240, PA14_13250	3	molybdenum cofactor biosynthesis, molybdopterin converting factor,, molybdopterin converting factor,	PA3918, PA3917, PA3916	No
PA14_30140	PA14_RS12285	operon_2685	1	0	non essential gene	C5	set2		hypothetical protein	81.198	0.0310428	61.8716	-0.515563	114.704	-0.327146	COG2915	[S] Function unknown					PA14_30140, PA14_30150	2	hypothetical protein, NA	PA2627, NA	Yes
PA14_30150	PA14_RS12290	operon_2685	0	1	non essential gene	C5	set2	mnmA	tRNA-specific 2-thiouridylase MnmA	479.471	0.157272	467.094	0.211543	1133.76	0.443139	COG0482	[J] Translation, ribosomal structure and biogenesis	essential gene	essential gene	essential gene	Core	PA14_30140, PA14_30150	2	hypothetical protein, NA	PA2627, NA	Yes
PA14_30310	PA14_RS12350	operon_2686	1	1	essential gene	C4	set2	lolA	outer-membrane lipoprotein carrier protein	1724.4	-0.339977	1377.88	-1.60132	2159.55	-2.81823	COG2834	[M] Cell wall/membrane/envelope biogenesis	essential gene	essential gene	essential gene	Core	PA14_30290, PA14_30310	2	cell division protein, outer-membrane lipoprotein carrier	PA2615, PA2614	Yes
PA14_25710	PA14_RS10425	operon_2687	1	1	non essential gene	C5	set2	pabC	4-amino-4-deoxychorismate lyase	1998.71	0.0643219	2036.71	-0.0300681	2563.34	-0.0120296	COG0115	[E] Amino acid transport and metabolism					PA14_25690, PA14_25710, PA14_25730, PA14_25740, PA14_25760	5	3-oxoacyl-(acyl carrier protein), 4-amino-4-deoxychorismate lyase, hypothetical protein, thymidylate kinase, DNA polymerase III	PA2965, PA2964, PA2963, PA2962, PA2961	Yes
PA14_25710	PA14_RS10425	operon_2687	1	1	non essential gene	C5	set2	pabC	4-amino-4-deoxychorismate lyase	1998.71	0.0643219	2036.71	-0.0300681	2563.34	-0.0120296	COG0115	[H] Coenzyme transport and metabolism					PA14_25690, PA14_25710, PA14_25730, PA14_25740, PA14_25760	5	3-oxoacyl-(acyl carrier protein), 4-amino-4-deoxychorismate lyase, hypothetical protein, thymidylate kinase, DNA polymerase III	PA2965, PA2964, PA2963, PA2962, PA2961	Yes
PA14_25730	PA14_RS10430	operon_2687	1	1	essential gene	C1	set1		hypothetical protein	600.094	-2.43987	347.084	-7.62515	113.9	-9.40204	COG1559	[S] Function unknown					PA14_25690, PA14_25710, PA14_25730, PA14_25740, PA14_25760	5	3-oxoacyl-(acyl carrier protein), 4-amino-4-deoxychorismate lyase, hypothetical protein, thymidylate kinase, DNA polymerase III	PA2965, PA2964, PA2963, PA2962, PA2961	Yes
PA14_28820	PA14_RS11735	operon_2688	1	1	non essential gene	C5	set2		hypothetical protein	1940.92	-0.0246661	1873.02	-0.00506135	2253	-0.0292297	COG4103	[S] Function unknown					PA14_28820, PA14_28830, PA14_28840	3	NA, NA, NA	NA, NA, NA	No
PA14_28830	PA14_RS11740	operon_2688	1	1	non essential gene	C5	set2		hypothetical protein	232.247	0.117599	258.475	0.410334	489.637	0.581023	COG1135	[P] Inorganic ion transport and metabolism					PA14_28820, PA14_28830, PA14_28840	3	NA, NA, NA	NA, NA, NA	No
PA14_71030	PA14_RS28925	operon_269	0	1	non essential gene	C5	set2		hypothetical protein	5885.58	-0.0568062	5475.38	-0.100812	6328.81	-0.152544	COG2113	[E] Amino acid transport and metabolism					PA14_71000, PA14_71020, PA14_71030	3	putative lycine betaine/L-proline, putative BC-type proline/glycine, hypothetical protein	PA5376, PA5377, PA5378	No
PA14_30660	PA14_RS12500	operon_2691	1	0	non essential gene	C5	set2	uvrC	excinuclease ABC subunit C	67.7088	0.0125938	63.7455	0.0948587	109.442	-0.0841764	COG0322	[L] Replication, recombination and repair					PA14_30650, PA14_30660, PA14_30670	3	response regulator GacA, excinuclease ABC subunit, CDP-diacylglycerol--glycerol-3-phosphate	PA2586, PA2585, PA2584	Yes
PA14_23900	PA14_RS09685	operon_2695	1	1	non essential gene	C5	set2	cvpA	hypothetical protein	425.848	-0.0805386	410.507	-0.225144	813.531	-0.570401	COG1286	[S] Function unknown					PA14_23900	1	hypothetical protein	PA3109	No
PA14_23920	PA14_RS09690	operon_2695	1	1	non essential gene	C5	set2	purF	amidophosphoribosyltransferase	1982.26	-0.178325	1986.16	-0.191019	3213.78	-0.324743	COG0034	[F] Nucleotide transport and metabolism				Conditional	PA14_23920, PA14_23930, PA14_23950	3	amidophosphoribosyltransferase, O-succinylhomoserine sulfhydrylase, oxidoreductase	PA3108, PA3107, PA3106	Yes
PA14_09530	PA14_RS03865	operon_2697	1	1	non essential gene	C5	set2	mexH	RND efflux membrane fusion protein	1436.73	-0.0390713	1460.24	-0.0702385	2252.67	-0.0629297	COG0845	[M] Cell wall/membrane/envelope biogenesis					PA14_09500, PA14_09520, PA14_09530, PA14_09540	4	outer membrane protein, RND efflux transporter, RND efflux membrane, hypothetical protein	PA4208, PA4207, PA4206, PA4205	No
PA14_56880	PA14_RS23180	operon_2698	0	1	non essential gene	C5	set2		membrane fusion protein	855.67	0.455752	989.333	0.663752	2145.86	1.01946	COG0845	[M] Cell wall/membrane/envelope biogenesis					PA14_56880	1	putative membrane fusion	PA4374	No
PA14_62510	PA14_RS25545	operon_27	1	1	non essential gene	C5	set2		glutamyl-Q tRNA(Asp) synthetase	941.647	-0.0554099	928.004	-0.0907023	1043	-0.129767	COG0008	[J] Translation, ribosomal structure and biogenesis					PA14_62510	1	glutamyl-Q tRNA(Asp) synthetase	PA4724	No
PA14_71160	PA14_RS28975	operon_270	1	1	non essential gene	C5	set2		hypothetical protein	403.057	0.155996	419.209	0.199468	709.369	0.100286	COG2113	[E] Amino acid transport and metabolism					PA14_71110, PA14_71120, PA14_71140, PA14_71150, PA14_71160	5	putative lipolytic enzyme, hypothetical protein, 3-hydroxybutyryl-CoA dehydrogenase, hypothetical protein, hypothetical protein	PA5384, PA5385, PA5386, PA5387, PA5388	No
PA14_12310	PA14_RS04980	operon_2700	1	1	non essential gene	C5	set2		metalloprotease	352.748	-0.0198702	316.237	0.0578489	776.512	0.0362153	COG0319	[J] Translation, ribosomal structure and biogenesis	essential gene	essential gene	essential gene	Core	PA14_12300, PA14_12310, PA14_12330	3	hypothetical protein, putative metalloprotease, hypothetical protein	PA3983, PA3982, PA3981	Yes
PA14_12060	PA14_RS04875	operon_2701	1	0	non essential gene	C5	set2	pbpA	penicillin-binding protein 2	140.991	0.200349	134.419	-0.0508984	169.274	0.194262	COG0768	[M] Cell wall/membrane/envelope biogenesis		essential gene	essential gene	Core	PA14_12030, PA14_12050, PA14_12060, PA14_12070	4	hypothetical protein, rRNA large subunit, penicillin-binding protein 2, rod shape-determining protein	PA4005, PA4004, PA4003, PA4002	Yes
PA14_12070	PA14_RS04880	operon_2701	1	1	non essential gene	C5	set2	rodA	rod shape-determining protein	184.839	-0.198681	177.046	-0.395129	206.585	-0.328952	COG0772	[M] Cell wall/membrane/envelope biogenesis			essential gene	Core	PA14_12030, PA14_12050, PA14_12060, PA14_12070	4	hypothetical protein, rRNA large subunit, penicillin-binding protein 2, rod shape-determining protein	PA4005, PA4004, PA4003, PA4002	Yes
PA14_51280	PA14_RS20845	operon_2704	1	0	non essential gene	C5	set2		hypothetical protein	120.157	0.405758	122.074	0.295629	217.85	0.518201	COG2716	[E] Amino acid transport and metabolism					PA14_51280	1	hypothetical protein	PA1009	No
PA14_51290	PA14_RS20850	operon_2704	1	1	non essential gene	C5	set2	bcp	bacterioferritin comigratory protein	363.254	0.068945	337.146	-0.126293	429.742	-0.3069	COG1225	[O] Posttranslational modification, protein turnover, chaperones					PA14_51290	1	bacterioferritin comigratory protein	PA1008	No
PA14_51990	PA14_RS21165	operon_2705	1	1	essential gene	C4	set2	wrbA	Trp repressor binding protein WrbA	483.441	-0.159548	405.904	-0.689667	569.934	-1.16871	COG0655	[S] Function unknown					PA14_51980, PA14_51990, PA14_52000	3	putative arsenate reductase, Trp repressor binding, hypothetical protein	PA0950, PA0949, PA0948	No
PA14_52000	PA14_RS21170	operon_2705	1	1	non essential gene	C5	set2		hypothetical protein	734.986	0.133007	729.148	0.184168	1337.08	0.367388	COG3308	[S] Function unknown					PA14_51980, PA14_51990, PA14_52000	3	putative arsenate reductase, Trp repressor binding, hypothetical protein	PA0950, PA0949, PA0948	No
PA14_17220	PA14_RS06910	operon_2707	0	0	non essential gene	C5	set2	lpxB	lipid-A-disaccharide synthase	70.2376	-0.426669	56.5155	-0.163203	132.19	-0.0661141	COG0763	[M] Cell wall/membrane/envelope biogenesis	essential gene		essential gene	Core	PA14_17170, PA14_17180, PA14_17190, PA14_17210, PA14_17220, PA14_17230	6	hypothetical protein, UDP-3-O-[3-hydroxymyristoyl] glucosamine, (3R)-hydroxymyristoyl-ACP dehydratase, UDP-N-acetylglucosamine acyltransferase, lipid-A-disaccharide synthase, ribonuclease HII	PA3647, PA3646, PA3645, PA3644, PA3643, PA3642	Yes
PA14_16930	PA14_RS06790	operon_2708	1	1	non essential gene	C5	set2		pyridoxal-phosphate dependent protein	1108.35	0.0452993	1118.4	-0.00741309	1680.54	-0.0171516	COG0520	[E] Amino acid transport and metabolism					PA14_16920, PA14_16930	2	hypothetical protein, putative pyridoxal-phosphate dependent	PA3668, PA3667	No
PA14_51920	PA14_RS21135	operon_271	0	1	essential gene	C4	set1		acylphosphatase	100.35	-0.612082	61.0646	-0.760204	43.9495	-1.1493	COG1254	[C] Energy production and conversion					PA14_51920, PA14_51930	2	acylphosphatase, thioredoxin	PA0954, PA0953	No
PA14_05040	PA14_RS02050	operon_2714	1	1	non essential gene	C5	set2		coproporphyrinogen III oxidase	453.596	0.109732	444.298	0.180334	562.552	0.258786	COG0635	[H] Coenzyme transport and metabolism					PA14_05040	1	coproporphyrinogen III oxidase	PA0386	No
PA14_05050	PA14_RS02055	operon_2714	1	1	non essential gene	C5	set2		deoxyribonucleotide triphosphate pyrophosphatase	399.268	0.0405409	380.71	0.0552533	802.156	0.0956838	COG0127	[F] Nucleotide transport and metabolism					PA14_05050, PA14_05060	2	putative deoxyribonucleotide triphosphate, hypothetical protein	PA0387, PA0388	No
PA14_72760	PA14_RS29615	operon_272	1	1	non essential gene	C5	set2		beta-lactamase	432.874	0.0111623	389.149	-0.17491	896.385	-0.150834	COG2602	[V] Defense mechanisms					PA14_72760	1	putative beta-lactamase	PA5514	No
PA14_27100	PA14_RS10950	operon_273	1	1	non essential gene	C5	set2	lipA	lactonizing lipase	4436.38	-0.052947	4381.51	-0.0412937	10902.8	-0.0413503	COG1075	[S] Function unknown					PA14_27100	1	lactonizing lipase precursor	PA2862	No
PA14_63620	PA14_RS26025	operon_274	1	0	non essential gene	C5	set2	lipC	lipase LipC	6.04222	0.753243	7.90536	0.292956	11.1999	0.136827	COG1075	[S] Function unknown					PA14_63620	1	lipase LipC	PA4813	No
PA14_24040	PA14_RS09730	operon_2740	1	1	non essential gene	C5	set2	xcpU	general secretion pathway outer membrane protein H precursor	712.997	0.00946619	724.554	0.00956466	1480.53	0.135701	COG2165	[U] Intracellular trafficking, secretion, and vesicular transport					PA14_24020, PA14_24040, PA14_24050, PA14_24060, PA14_24070, PA14_24080, PA14_24100	7	general secretion pathway, general secretion pathway, general secretion pathway, general secretion pathway, general secretion pathway, general secretion pathway, general secretion pathway	PA3101, PA3100, PA3099, PA3098, PA3097, PA3096, PA3095	No
PA14_24050	PA14_RS09735	operon_2740	1	1	non essential gene	C5	set2	xcpV	general secretion pathway protein I	545.983	0.195692	578.804	0.361278	1016.56	0.481488	COG2165	[U] Intracellular trafficking, secretion, and vesicular transport		essential gene			PA14_24020, PA14_24040, PA14_24050, PA14_24060, PA14_24070, PA14_24080, PA14_24100	7	general secretion pathway, general secretion pathway, general secretion pathway, general secretion pathway, general secretion pathway, general secretion pathway, general secretion pathway	PA3101, PA3100, PA3099, PA3098, PA3097, PA3096, PA3095	No
PA14_24050	PA14_RS09735	operon_2740	1	1	non essential gene	C5	set2	xcpV	general secretion pathway protein I	545.983	0.195692	578.804	0.361278	1016.56	0.481488	COG2165	[N] Cell motility		essential gene			PA14_24020, PA14_24040, PA14_24050, PA14_24060, PA14_24070, PA14_24080, PA14_24100	7	general secretion pathway, general secretion pathway, general secretion pathway, general secretion pathway, general secretion pathway, general secretion pathway, general secretion pathway	PA3101, PA3100, PA3099, PA3098, PA3097, PA3096, PA3095	No
PA14_24060	PA14_RS09740	operon_2740	1	1	non essential gene	C5	set2	xcpW	general secretion pathway protein J	475.533	-0.166747	484.977	-0.201568	784.016	-0.19321	COG4795	[U] Intracellular trafficking, secretion, and vesicular transport					PA14_24020, PA14_24040, PA14_24050, PA14_24060, PA14_24070, PA14_24080, PA14_24100	7	general secretion pathway, general secretion pathway, general secretion pathway, general secretion pathway, general secretion pathway, general secretion pathway, general secretion pathway	PA3101, PA3100, PA3099, PA3098, PA3097, PA3096, PA3095	No
PA14_24070	PA14_RS09745	operon_2740	1	1	non essential gene	C5	set2	xcpX	general secretion pathway protein K	3506.75	0.0108162	3436.06	-0.0817536	4209.33	-0.155507	COG3156	[U] Intracellular trafficking, secretion, and vesicular transport					PA14_24020, PA14_24040, PA14_24050, PA14_24060, PA14_24070, PA14_24080, PA14_24100	7	general secretion pathway, general secretion pathway, general secretion pathway, general secretion pathway, general secretion pathway, general secretion pathway, general secretion pathway	PA3101, PA3100, PA3099, PA3098, PA3097, PA3096, PA3095	No
PA14_15680	PA14_RS06285	operon_275	1	1	non essential gene	C5	set2		hypothetical protein	592.423	0.0182518	617.265	-0.0220313	917.803	-0.0116199	COG0590	[F] Nucleotide transport and metabolism	essential gene		essential gene	Core	PA14_15670, PA14_15680	2	putative metallo-oxidoreductase, hypothetical protein	PA3768, PA3767	Yes
PA14_15680	PA14_RS06285	operon_275	1	1	non essential gene	C5	set2		hypothetical protein	592.423	0.0182518	617.265	-0.0220313	917.803	-0.0116199	COG0590	[J] Translation, ribosomal structure and biogenesis	essential gene		essential gene	Core	PA14_15670, PA14_15680	2	putative metallo-oxidoreductase, hypothetical protein	PA3768, PA3767	Yes
PA14_13250	PA14_RS05330	operon_2751	1	0	non essential gene	C5	set2	moaE	molybdopterin converting factor, large subunit	81.5627	-0.0898063	76.5346	0.19429	187.814	0.0205272	COG0314	[H] Coenzyme transport and metabolism					PA14_13230, PA14_13240, PA14_13250	3	molybdenum cofactor biosynthesis, molybdopterin converting factor,, molybdopterin converting factor,	PA3918, PA3917, PA3916	No
PA14_44620	PA14_RS18140	operon_276	0	1	non essential gene	C5	set2		hypothetical protein	237.147	0.212694	257.654	0.328099	308.684	0.336048	COG0718	[S] Function unknown		essential gene			PA14_44620	1	hypothetical protein	PA1533	No
PA14_14310	PA14_RS05715	operon_277	1	1	non essential gene	C5	set2		transcriptional regulator	1456.49	-0.261129	1346.94	-0.363001	1619.51	-0.50135	COG0640	[K] Transcription		essential gene			PA14_14310	1	NA	NA	No
PA14_35130	PA14_RS14300	operon_278	1	1	essential gene	C2	set2	arsR	arsenic resistance transcriptional regulator	104.166	-1.29911	83.3461	-3.03004	126.413	-4.35376	COG0640	[K] Transcription					PA14_35080, PA14_35100, PA14_35110, PA14_35130	4	putative arsenical resistance, arsenate reductase, ArsB protein, arsenic resistance transcriptional	PA2280, PA2279, PA2278, PA2277	No
PA14_41710	PA14_RS16920	operon_2780	1	0	non essential gene	C5	set2		hypothetical protein	24.6381	-0.124317	29.117	-0.0468004	31.8836	-0.374723	COG1305	[E] Amino acid transport and metabolism					PA14_41690, PA14_41710, PA14_41730	3	hypothetical protein, hypothetical protein, hypothetical protein	PA1768, PA1767, PA1766	No
PA14_41730	PA14_RS16925	operon_2780	1	1	non essential gene	C5	set2		hypothetical protein	1687.59	0.113183	1692.98	0.0301827	2088.91	-0.0223107	COG0189	[H] Coenzyme transport and metabolism					PA14_41690, PA14_41710, PA14_41730	3	hypothetical protein, hypothetical protein, hypothetical protein	PA1768, PA1767, PA1766	No
PA14_41730	PA14_RS16925	operon_2780	1	1	non essential gene	C5	set2		hypothetical protein	1687.59	0.113183	1692.98	0.0301827	2088.91	-0.0223107	COG0189	[J] Translation, ribosomal structure and biogenesis					PA14_41690, PA14_41710, PA14_41730	3	hypothetical protein, hypothetical protein, hypothetical protein	PA1768, PA1767, PA1766	No
PA14_25650	PA14_RS10405	operon_2786	1	1	essential gene	C2	set1	fabD	malonyl-CoA-ACP transacylase	329.207	-1.4486	140.829	-3.17142	38.9456	-5.15611	COG0331	[I] Lipid transport and metabolism			essential gene	Core	PA14_25650	1	malonyl-CoA-[acyl-carrier-protein]	PA2968	Yes
PA14_71990	PA14_RS29310	operon_279	1	1	non essential gene	C5	set2	gmd	GDP-mannose 4,6-dehydratase	495.338	0.205703	522.457	0.388919	1206.03	0.602397	COG1089	[M] Cell wall/membrane/envelope biogenesis					PA14_71910, PA14_71920, PA14_71930, PA14_71940, PA14_71960, PA14_71970, PA14_71990, PA14_72000	8	glycosyltransferase WbpZ, glycosyltransferase WbpY, glycosyltransferase WbpX, ABC subunit of, membrane subunit of, GDP-mannose pyrophosphorylase, GDP-mannose 4,6-dehydratase, oxidoreductase Rmd	PA5447, PA5448, PA5449, PA5450, PA5451, PA5452, PA5453, PA5454	No
PA14_16800	PA14_RS06740	operon_2790	1	0	essential gene	C4	set1		efflux transmembrane protein	1179.31	-0.590495	636.467	-1.3184	208.445	-2.23999	COG0845	[M] Cell wall/membrane/envelope biogenesis					PA14_16800, PA14_16820	2	putative efflux transmembrane, putative efflux transmembrane	PA3677, PA3676	No
PA14_16820	PA14_RS06745	operon_2790	1	1	non essential gene	C5	set2		efflux transmembrane protein	184.677	-0.205568	171.418	-0.422904	209.803	-0.980635	COG0841	[V] Defense mechanisms					PA14_16800, PA14_16820	2	putative efflux transmembrane, putative efflux transmembrane	PA3677, PA3676	No
PA14_46580	PA14_RS18915	operon_2791	0	1	non essential gene	C5	set2		multidrug efflux gene product	1241.4	0.240031	1196.84	0.0996601	3164.02	0.120811	COG0845	[M] Cell wall/membrane/envelope biogenesis					PA14_46580, PA14_46590, PA14_46600	3	NA, NA, NA	NA, NA, NA	No
PA14_46590	PA14_RS18920	operon_2791	1	1	non essential gene	C5	set2		AcrB/AcrD/AcrF family protein	992.98	0.00135239	1002.43	0.0390673	2266.3	0.0776653	COG0841	[V] Defense mechanisms					PA14_46580, PA14_46590, PA14_46600	3	NA, NA, NA	NA, NA, NA	No
PA14_15310	PA14_RS06100	operon_28	1	1	essential gene	C1	set2	guaB	inosine 5'-monophosphate dehydrogenase	145.407	-2.06008	118.284	-5.05708	127.981	-8.08073	COG0516	[F] Nucleotide transport and metabolism	essential gene		essential gene	Core	PA14_15310	1	inosine 5'-monophosphate dehydrogenase	PA3770	Yes
PA14_66980	PA14_RS27335	operon_2846	1	1	essential gene	C4	set2	tatC	sec-independent protein translocase TatC	983.227	-0.452899	883.36	-0.965123	977.62	-1.44936	COG0805	[U] Intracellular trafficking, secretion, and vesicular transport		essential gene		Conditional	PA14_66940, PA14_66950, PA14_66960, PA14_66970, PA14_66980, PA14_66990	6	phosphoribosyl-AMP cyclohydrolase, phosphoribosyl-ATP pyrophosphatase, twin arginine translocase, sec-independent translocase, sec-independent protein translocase, 16S ribosomal RNA	PA5066, PA5067, PA5068, PA5069, PA5070, PA5071	Yes
PA14_57760	PA14_RS23545	operon_285	1	1	non essential gene	C5	set2	algW	AlgW protein	235.688	-0.156989	236.567	-0.0636893	340.792	0.0439783	COG0265	[O] Posttranslational modification, protein turnover, chaperones					PA14_57760	1	AlgW protein	PA4446	No
PA14_12100	PA14_RS04895	operon_286	0	0	non essential gene	C5	set2	dacC	D-ala-D-ala-carboxypeptidase	63.2737	-0.0747016	58.3712	-0.237199	73.1605	-0.450116	COG1686	[M] Cell wall/membrane/envelope biogenesis					PA14_12100	1	D-ala-D-ala-carboxypeptidase	PA3999	No
PA14_06210	PA14_RS02500	operon_287	1	1	non essential gene	C5	set2		transcriptional regulator	552.254	0.49895	597.152	0.848861	880.408	1.19216	COG1309	[K] Transcription					PA14_06210	1	putative transcriptional regulator	PA0475	No
PA14_23590	PA14_RS09565	operon_288	1	1	essential gene	C4	set2	sawR	SawR	8405.22	-0.363283	7377.76	-0.78447	7773.47	-1.28931	COG1309	[K] Transcription					PA14_23590, PA14_23610	2	putative transcriptional regulator, putative hydrolase	PA3133, PA3132	No
PA14_28320	PA14_RS11505	operon_289	1	1	non essential gene	C5	set2		TetR family transcriptional regulator	153.728	-0.397716	144.076	-0.624538	231.094	-0.809882	COG1309	[K] Transcription					PA14_28320	1	TetR family transcriptional	PA2766	No
PA14_18275	PA14_RS07335	operon_2896	1	0	non essential gene	C5	set2	fruA	phosphotransferase system, fructose-specific IIBC component	30.8862	-0.0574298	29.1907	0.879739	43.4805	0.200568	COG1299	[G] Carbohydrate transport and metabolism					PA14_18250, PA14_18260, PA14_18275	3	putative phosphotransferase system, 1-phosphofructokinase, phosphotransferase system, fructose-specific	PA3562, PA3561, PA3560	No
PA14_38350	PA14_RS15585	operon_29	1	1	non essential gene	C5	set2	galU	UTP-glucose-1-phosphate uridylyltransferase	304.612	0.0219091	294.035	0.0172956	453.237	-0.024323	COG1210	[M] Cell wall/membrane/envelope biogenesis					PA14_38350	1	UTP-glucose-1-phosphate uridylyltransferase	PA2023	No
PA14_36300	PA14_RS14765	operon_290	1	1	non essential gene	C5	set2		TetR family transcriptional regulator	1717.68	0.0570211	1756.55	0.117645	3267.82	0.14707	COG1309	[K] Transcription					PA14_36300	1	TetR family transcriptional	PA2196	No
PA14_48190	PA14_RS19575	operon_291	1	0	non essential gene	C5	set2		transcriptional regulator	30.7153	-0.299203	23.5571	-0.56387	49.1634	-0.66022	COG1309	[K] Transcription					PA14_48170, PA14_48190	2	hypothetical protein, putative transcriptional regulator	PA1242, PA1241	No
PA14_53410	PA14_RS21745	operon_292	1	1	non essential gene	C5	set2		transcriptional regulator	330.828	0.0329484	320.959	0.0615663	407.383	-0.0592004	COG1309	[K] Transcription					PA14_53400, PA14_53410	2	oxidoreductase, transcriptional regulator	PA0840, PA0839	No
PA14_57710	PA14_RS23525	operon_2926	1	0	non essential gene	C5	set2	cysN	bifunctional sulfate adenylyltransferase subunit 1/adenylylsulfate kinase	134.224	0.566464	163.921	1.12369	293.703	1.26514	COG0529	[H] Coenzyme transport and metabolism					PA14_57710, PA14_57720	2	bifunctional sulfate adenylyltransferase, sulfate adenylyltransferase subunit	PA4442, PA4443	No
PA14_57720	PA14_RS23530	operon_2926	1	1	non essential gene	C5	set2	cysD	sulfate adenylyltransferase subunit 2	503.775	0.0132103	516.162	0.231595	1147.72	0.2805	COG0175	[H] Coenzyme transport and metabolism					PA14_57710, PA14_57720	2	bifunctional sulfate adenylyltransferase, sulfate adenylyltransferase subunit	PA4442, PA4443	No
PA14_63880	PA14_RS26120	operon_293	0	0	non essential gene	C5	set2		transcriptional regulator	7.3015	-0.959911	8.13939	-0.72097	7.69112	-0.0760312	COG1309	[K] Transcription					PA14_63880	1	putative transcriptional regulator	PA4831	No
[truncated: 5,209 more rows]
