# Supplementary material for: Genome-wide CRISPRi-seq identified ferredoxin-NADP reductase FprB as a synergistic target for gallium therapy in Pseudomonas aeruginosa
Source: bioRxiv preprint, doi:10.1101/2024.09.01.610675, version 1 (2024-09-01)
Supplement: Supplementary Table S7 [file 610675_file08.xlsx]

## Sheet: All
No.	Locus.Tag in PA14	Locus.Tag in PAO1	Gene.Name	baseMean	log2FoldChange	lfcSE	stat	pvalue	padj	group	Product.Name.y	Subcellular.Localization..Confidence.Class..y
1	PA14_30270	PA2617	aat	671.913	0.00901434	0.0710882	0.126805	0.899095	0.946328	NOT_CHANGE	leucyl/phenylalanyl-tRNA--protein transferase	Cytoplasmic [Class 3]
2	PA14_17270	PA3639	accA	5.19052	2.6218	0.799381	3.27979	0.00103886	0.00444778	UP	acetyl-CoA carboxylase carboxyltransferase subunit alpha	Cytoplasmic [Class 3]
3	PA14_64100	PA4847	accB	1106.53	2.0609	0.329406	6.25642	3.93911e-10	4.11257e-09	UP	acetyl-CoA carboxylase biotin carboxyl carrier protein subunit	Unknown (This protein may have multiple localization sites) [Class 3]
4	PA14_64110	PA4848	accC	459.28	1.10401	0.209207	5.27712	1.31227e-07	1.06669e-06	NOT_CHANGE	acetyl-CoA carboxylase biotin carboxylase subunit	Cytoplasmic [Class 3]
5	PA14_23860	PA3112	accD	23.1717	0.320781	0.313389	1.02359	0.306031	0.465264	NOT_CHANGE	acetyl-CoA carboxylase subunit beta	Cytoplasmic [Class 3]
6	PA14_66290	PA5015	aceE	272.757	-0.247319	0.14982	-1.65077	0.0987851	0.197848	NOT_CHANGE	pyruvate dehydrogenase subunit E1	Cytoplasmic [Class 3]
7	PA14_66310	PA5016	aceF	20.2057	-0.770699	0.404488	-1.90537	0.0567322	0.129174	NOT_CHANGE	dihydrolipoamide acetyltransferase	Cytoplasmic [Class 3]
8	PA14_46450	PA1376	aceK	1113.33	-0.356572	0.057828	-6.16609	7.00001e-10	7.11251e-09	NOT_CHANGE	bifunctional isocitrate dehydrogenase kinase/phosphatase	Cytoplasmic [Class 3]
9	PA14_44290	PA1562	acnA	142.603	-0.0684614	0.134466	-0.509136	0.610657	0.742844	NOT_CHANGE	aconitate hydratase	Cytoplasmic [Class 3]
10	PA14_41470	PA1787	acnB	1781.83	0.226022	0.0899673	2.51227	0.0119958	0.0366574	NOT_CHANGE	bifunctional aconitate hydratase 2/2-methylisocitrate dehydratase	Cytoplasmic [Class 3]
11	PA14_10250	PA4151	acoB	6695.07	-1.05572	0.061861	-17.0659	2.66061e-65	2.32906e-63	NOT_CHANGE	acetoin catabolism protein AcoB	Cytoplasmic [Class 3]
12	PA14_10290	PA4147	acoR	1510.56	-0.0292386	0.0693836	-0.421405	0.67346	0.790752	NOT_CHANGE	transcriptional regulator AcoR	Cytoplasmic [Class 3]
13	PA14_22490	NA	acpD	571.683	-0.0116895	0.0834925	-0.140007	0.888655	0.940034	NOT_CHANGE	ACP phosphodieterase	Cytoplasmic [Class 3]
14	PA14_25670	PA2966	acpP	29.4013	1.34684	0.289254	4.65625	3.22019e-06	2.20492e-05	NOT_CHANGE	acyl carrier protein	Cytoplasmic [Class 3]
15	PA14_52800	PA0887	acsA	1297.93	0.336769	0.0833555	4.04015	5.34171e-05	0.000299157	NOT_CHANGE	acetyl-CoA synthetase	Cytoplasmic [Class 3]
16	PA14_62630	PA4733	acsB	515.269	-0.055535	0.0814116	-0.682151	0.495143	0.643675	NOT_CHANGE	acetyl-CoA synthetase	Cytoplasmic [Class 3]
17	PA14_23540	NA	act	638.575	0.315209	0.105414	2.99021	0.00278786	0.0105127	NOT_CHANGE	transcriptional regulator	Cytoplasmic [Class 3]
18	PA14_22350	NA	actP	439.076	-0.0878754	0.0823837	-1.06666	0.286126	0.442286	NOT_CHANGE	acetate permease	Cytoplasmic Membrane [Class 3]
19	PA14_37190	PA2118	ada	908.997	-0.0604378	0.075924	-0.79603	0.426015	0.58158	NOT_CHANGE	O6-methylguanine-DNA methyltransferase	Cytoplasmic [Class 3]
20	PA14_10230	NA	adh	1325.01	-0.00579862	0.0633493	-0.0915341	0.927068	0.963366	NOT_CHANGE	2,3-butanediol dehydrogenase	Cytoplasmic [Class 3]
21	PA14_71630	PA5427	adhA	516.289	0.204389	0.105449	1.93828	0.0525888	0.121589	NOT_CHANGE	alcohol dehydrogenase	Cytoplasmic [Class 3]
22	PA14_17400	PA3629	adhC	190.412	0.165457	0.149014	1.11034	0.266853	0.420258	NOT_CHANGE	alcohol dehydrogenase	Cytoplasmic [Class 3]
23	PA14_16700	PA3686	adk	7.84925	0.607277	0.490656	1.23768	0.215834	0.36025	NOT_CHANGE	adenylate kinase	Cytoplasmic [Class 3]
24	PA14_44300	PA1561	aer	10109.5	0.0774228	0.161547	0.47926	0.631754	0.757412	NOT_CHANGE	aerotaxis receptor Aer	Cytoplasmic Membrane [Class 3]
25	PA14_03810	PA0292	aguA	1120.79	-0.0998483	0.0625771	-1.5956	0.110577	0.216215	NOT_CHANGE	agmatine deiminase	Cytoplasmic [Class 3]
26	PA14_03830	PA0293	aguB	598.537	0.11019	0.100697	1.09427	0.273835	0.428526	NOT_CHANGE	N-carbamoylputrescine amidohydrolase	Cytoplasmic [Class 3]
27	PA14_03840	PA0294	aguR	135.454	-0.1143	0.135772	-0.841852	0.399871	0.557526	NOT_CHANGE	transcriptional regulator AguR	Cytoplasmic [Class 3]
28	PA14_01710	PA0139	ahpC	2383.84	0.220177	0.0884243	2.49	0.0127742	0.0385188	NOT_CHANGE	alkyl hydroperoxide reductase	Cytoplasmic [Class 3]
29	PA14_01720	PA0140	ahpF	2738.85	0.424429	0.131058	3.23848	0.00120169	0.00506491	NOT_CHANGE	alkyl hydroperoxide reductase	Cytoplasmic Membrane [Class 3]
30	PA14_52600	PA0903	alaS	0.834853	0.478284	1.62807	0.293773	0.768931	0.858728	NOT_CHANGE	alanyl-tRNA synthetase	Cytoplasmic [Class 3]
31	PA14_44850	PA1515	alc	153.769	-0.124585	0.12615	-0.987598	0.323349	0.482771	NOT_CHANGE	allantoicase	Cytoplasmic [Class 3]
32	PA14_18550	PA3542	alg44	449.878	-0.0334964	0.0798857	-0.419304	0.674994	0.7919	NOT_CHANGE	alginate biosynthesis protein Alg44	Periplasmic [Class 3]
33	PA14_18565	PA3541	alg8	62.7462	-0.0601806	0.24151	-0.249185	0.803218	0.884006	NOT_CHANGE	alginate biosynthesis protein Alg8	Cytoplasmic Membrane [Class 3]
34	PA14_18380	PA3551	algA	389.054	-0.0871051	0.0897312	-0.970734	0.331681	0.49094	NOT_CHANGE	mannose-1-phosphate guanylyltransferase	Cytoplasmic [Class 3]
35	PA14_72380	PA5483	algB	1137.97	-0.0708274	0.0741691	-0.954945	0.339606	0.498415	NOT_CHANGE	two-component response regulator AlgB	Cytoplasmic [Class 3]
36	PA14_70270	PA5322	algC	438.068	0.606373	0.0903636	6.71036	1.94143e-11	2.23618e-10	NOT_CHANGE	phosphomannomutase	Unknown (This protein may have multiple localization sites) [Class 3]
37	PA14_18580	PA3540	algD	3625.14	-0.376894	0.110468	-3.41178	0.000645396	0.0029053	NOT_CHANGE	GDP-mannose 6-dehydrogenase AlgD	Cytoplasmic [Class 3]
38	PA14_18500	PA3545	algG	349.926	0.109096	0.0866801	1.2586	0.208174	0.350966	NOT_CHANGE	alginate-c5-mannuronan-epimerase AlgG	Periplasmic [Class 3]
39	PA14_18450	PA3548	algI	115.173	0.256709	0.147416	1.74139	0.0816148	0.169919	NOT_CHANGE	alginate o-acetyltransferase AlgI	Cytoplasmic Membrane [Class 3]
40	PA14_18520	PA3543	algK	132.523	0.0965469	0.137868	0.700287	0.483748	0.632911	NOT_CHANGE	alginate biosynthetic protein AlgK	Periplasmic [Class 3]
41	PA14_18470	PA3547	algL	3195.92	-0.132125	0.134758	-0.980461	0.326858	0.485829	NOT_CHANGE	poly(beta-D-mannuronate) lyase	Periplasmic [Class 3]
42	PA14_69370	PA5253	algP	1230.51	-0.310528	0.0586082	-5.29837	1.16839e-07	9.57948e-07	NOT_CHANGE	alginate regulatory protein AlgP	Unknown [Class 3]
43	PA14_69390	PA5255	algQ	673.992	-0.237901	0.079949	-2.97566	0.00292359	0.0109846	NOT_CHANGE	anti-RNA polymerase sigma 70 factor	Cytoplasmic [Class 3]
44	PA14_69470	PA5261	algR	311.511	0.0108261	0.0993866	0.108929	0.913259	0.955264	NOT_CHANGE	alginate biosynthesis regulatory protein AlgR	Cytoplasmic [Class 3]
45	PA14_54430	PA0762	algU	1484.73	0.543109	0.071445	7.60178	2.92074e-14	4.07329e-13	NOT_CHANGE	RNA polymerase sigma factor AlgU	Cytoplasmic [Class 3]
46	PA14_57760	PA4446	algW	733.372	-0.236989	0.0755013	-3.13888	0.00169595	0.00684059	NOT_CHANGE	AlgW protein	Unknown (This protein may have multiple localization sites) [Class 3]
47	PA14_18480	PA3546	algX	346.724	0.0333248	0.101347	0.328817	0.742294	0.838858	NOT_CHANGE	alginate biosynthesis protein AlgX	Periplasmic [Class 3]
48	PA14_69480	NA	algZ	894.728	0.0456613	0.0857568	0.532451	0.594414	0.727793	NOT_CHANGE	alginate biosynthesis protein AlgZ/FimS	Cytoplasmic Membrane [Class 3]
49	PA14_42700	PA1686	alkA	103.836	0.0254681	0.144105	0.176733	0.859718	0.920896	NOT_CHANGE	DNA-3-methyladenine glycosidase II	Unknown [Class 3]
50	PA14_21250	NA	alkB	765.586	-0.148695	0.0985063	-1.5095	0.131172	0.248159	NOT_CHANGE	hypothetical protein	Unknown [Class 3]
51	PA14_30810	PA2574	alkB1	4259.83	0.13488	0.0942697	1.43078	0.152492	0.27846	NOT_CHANGE	alkane-1 monooxygenase	Cytoplasmic Membrane [Class 3]
52	PA14_44700	PA1525	alkB2	4528.26	0.226554	0.0420603	5.38639	7.18859e-08	6.03291e-07	NOT_CHANGE	alkane-1 monooxygenase	Cytoplasmic Membrane [Class 3]
53	PA14_65110	PA4930	alr	28.4463	-0.506721	0.275654	-1.83825	0.066026	0.144662	NOT_CHANGE	biosynthetic alanine racemase	Cytoplasmic [Class 3]
54	PA14_05810	PA1027	amaB	92.2848	-0.168158	0.162867	-1.03248	0.301845	0.460703	NOT_CHANGE	allantoate amidohydrolase	Cytoplasmic [Class 3]
55	PA14_73040	PA5538	amiA	400.913	0.832577	0.0985592	8.44748	2.97653e-17	4.93774e-16	NOT_CHANGE	N-acetylmuramoyl-L-alanine amidase	Unknown [Class 3]
56	PA14_65370	PA4947	amiB	546.981	0.340186	0.12865	2.64426	0.0081869	0.0265433	NOT_CHANGE	N-acetylmuramoyl-L-alanine amidase	Unknown [Class 3]
57	PA14_20580	PA3364	amiC	8.76282	-0.0942579	0.470322	-0.200411	0.841159	0.911532	NOT_CHANGE	aliphatic amidase expression-regulating protein	Cytoplasmic [Class 3]
58	PA14_20560	PA3366	amiE	1338.65	-0.0811732	0.0595301	-1.36357	0.172704	0.305308	NOT_CHANGE	acylamide amidohydrolase	Cytoplasmic [Class 3]
59	PA14_20590	PA3363	amiR	3.5005	-0.330592	0.790534	-0.418188	0.67581	0.792204	NOT_CHANGE	aliphatic amidase regulator	Cytoplasmic [Class 3]
60	PA14_10790	PA4110	ampC	70.6384	0.0147245	0.179026	0.0822478	0.93445	0.966008	NOT_CHANGE	beta-lactamase	Periplasmic [Class 3]
61	PA14_58670	PA4522	ampD	188.993	-0.0191452	0.125973	-0.151979	0.879203	0.934341	NOT_CHANGE	N-acetyl-anhydromuranmyl-L-alanine amidase	Cytoplasmic [Class 3]
62	PA14_10800	PA4109	ampR	150.257	0.205635	0.143622	1.43178	0.152208	0.278086	NOT_CHANGE	transcriptional regulator AmpR	Cytoplasmic [Class 3]
63	PA14_38410	NA	amrB	21.5811	0.00960204	0.344319	0.027887	0.977752	0.987821	NOT_CHANGE	multidrug efflux protein	Cytoplasmic Membrane [Class 3]
64	PA14_20290	PA3385	amrZ	1383.71	-0.0312942	0.0775418	-0.403578	0.686523	0.798659	NOT_CHANGE	DNA binding-protein	Cytoplasmic [Class 3]
65	PA14_69795	PA5287	amtB	173.024	0.163716	0.143625	1.13988	0.254334	0.405254	NOT_CHANGE	ammonium transporter	Cytoplasmic Membrane [Class 3]
66	PA14_08520	NA	anmK	1402.75	-0.306629	0.0581998	-5.26856	1.375e-07	1.11449e-06	NOT_CHANGE	anhydro-N-acetylmuramic acid kinase	Cytoplasmic [Class 3]
67	PA14_44490	PA1544	anr	803.068	0.168672	0.106611	1.58212	0.113622	0.220802	NOT_CHANGE	transcriptional regulator Anr	Cytoplasmic [Class 3]
68	PA14_46970	PA1337	ansB	31.3676	-0.0455049	0.262877	-0.173104	0.86257	0.922824	NOT_CHANGE	glutaminase-asparaginase	Periplasmic [Class 3]
69	PA14_32160	PA2512	antA	2050.17	-0.3511	0.0594833	-5.90251	3.58015e-09	3.41224e-08	NOT_CHANGE	anthranilate dioxygenase large subunit	Cytoplasmic [Class 3]
70	PA14_32150	PA2513	antB	39.6796	0.640728	0.250396	2.55886	0.0105017	0.0328143	NOT_CHANGE	anthranilate dioxygenase small subunit	Cytoplasmic [Class 3]
71	PA14_32140	PA2514	antC	570.378	0.0367941	0.108204	0.340045	0.733823	0.833046	NOT_CHANGE	anthranilate dioxygenase reductase	Cytoplasmic [Class 3]
72	PA14_52790	PA0888	aotJ	723.051	-0.192534	0.0945773	-2.03573	0.0417773	0.101068	NOT_CHANGE	arginine/ornithine binding protein AotJ	Periplasmic [Class 3]
73	PA14_52770	PA0890	aotM	1618.78	-0.253225	0.107874	-2.34743	0.0189036	0.0530382	NOT_CHANGE	arginine/ornithine transport protein AotM	Cytoplasmic Membrane [Class 3]
74	PA14_52750	PA0892	aotP	454.243	0.248923	0.190917	1.30383	0.192292	0.331357	NOT_CHANGE	arginine/ornithine transport protein AotP	Cytoplasmic Membrane [Class 3]
75	PA14_52780	PA0889	aotQ	1467.8	0.520152	0.0926902	5.61173	2.00314e-08	1.77814e-07	NOT_CHANGE	arginine/ornithine transport protein AotQ	Cytoplasmic Membrane [Class 3]
76	PA14_07710	NA	apaG	2844.59	-0.0200793	0.0932522	-0.215323	0.829516	0.903511	NOT_CHANGE	ApaG protein	Unknown [Class 3]
77	PA14_07700	PA0590	apaH	119.478	0.151472	0.154368	0.981236	0.326476	0.485676	NOT_CHANGE	diadenosine tetraphosphatase	Cytoplasmic [Class 3]
78	PA14_57160	NA	apbA	102.515	-0.262274	0.196012	-1.33805	0.18088	0.315804	NOT_CHANGE	2-dehydropantoate 2-reductase	Unknown [Class 3]
79	PA14_46230	PA1409	aphA	174.597	-0.167127	0.114063	-1.46522	0.142861	0.265387	NOT_CHANGE	acetylpolyamine aminohydrolase	Cytoplasmic [Class 3]
80	PA14_48060	PA1249	aprA	201.709	0.00224772	0.120158	0.0187063	0.985075	0.99232	NOT_CHANGE	alkaline metalloproteinase	Extracellular [Class 3]
81	PA14_48115	PA1246	aprD	928.304	0.257799	0.0805326	3.20117	0.00136869	0.00569401	NOT_CHANGE	alkaline protease secretion protein AprD	Cytoplasmic Membrane [Class 3]
82	PA14_48100	PA1247	aprE	1933.45	-0.0469424	0.0740333	-0.634071	0.526035	0.671408	NOT_CHANGE	alkaline protease secretion protein AprE	Cytoplasmic Membrane [Class 3]
83	PA14_48090	PA1248	aprF	70.3228	0.231722	0.207988	1.11412	0.26523	0.418165	NOT_CHANGE	alkaline protease secretion outer membrane protein AprF precursor	Outer Membrane [Class 3]
84	PA14_48040	PA1250	aprI	158.372	0.00928984	0.130492	0.071191	0.943246	0.969794	NOT_CHANGE	alkaline proteinase inhibitor AprI	Periplasmic [Class 3]
85	PA14_44500	PA1543	apt	4.65392	0.0403782	0.741803	0.0544326	0.956591	0.976871	NOT_CHANGE	adenine phosphoribosyltransferase	Cytoplasmic [Class 3]
86	PA14_01620	NA	aptA	1010.4	-0.126214	0.0637439	-1.98001	0.0477024	0.112299	NOT_CHANGE	beta alanine--pyruvate transaminase	Cytoplasmic [Class 3]
87	PA14_11660	PA4034	aqpZ	985.793	0.0184604	0.0732295	0.252089	0.800972	0.882729	NOT_CHANGE	aquaporin Z	Cytoplasmic Membrane [Class 3]
88	PA14_68330	PA5171	arcA	2507.31	1.53728	0.108888	14.1181	2.94011e-45	1.46748e-43	NOT_CHANGE	arginine deiminase	Cytoplasmic [Class 3]
89	PA14_68340	PA5172	arcB	604.79	0.00155196	0.0950248	0.0163321	0.986969	0.993254	NOT_CHANGE	ornithine carbamoyltransferase	Cytoplasmic [Class 3]
90	PA14_68350	PA5173	arcC	543.727	-0.0688647	0.104547	-0.658694	0.510092	0.657699	NOT_CHANGE	carbamate kinase	Cytoplasmic [Class 3]
91	PA14_68300	PA5170	arcD	428.189	0.0302358	0.0824659	0.366646	0.713883	0.817961	NOT_CHANGE	arginine/ornithine antiporter	Cytoplasmic Membrane [Class 3]
92	PA14_68740	PA5204	argA	131.393	1.56516	0.149651	10.4588	1.33588e-25	3.40859e-24	NOT_CHANGE	N-acetylglutamate synthase	Cytoplasmic [Class 3]
93	PA14_70280	PA5323	argB	70.584	0.565558	0.177494	3.18635	0.00144081	0.00595368	NOT_CHANGE	acetylglutamate kinase	Cytoplasmic [Class 3]
94	PA14_08480	PA0662	argC	1755.41	-0.342204	0.0916751	-3.73279	0.000189372	0.000956951	NOT_CHANGE	N-acetyl-gamma-glutamyl-phosphate reductase	Cytoplasmic [Class 3]
95	PA14_52720	NA	argD	448.909	0.25603	0.10881	2.35299	0.018623	0.0524014	NOT_CHANGE	bifunctional N-succinyldiaminopimelate-aminotransferase/acetylornithine transaminase	Cytoplasmic [Class 3]
96	PA14_68770	PA5206	argE	99.8509	0.315695	0.158552	1.99111	0.0464686	0.10994	NOT_CHANGE	acetylornithine deacetylase	Cytoplasmic [Class 3]
97	PA14_18610	PA3537	argF	1289.87	0.738992	0.127247	5.80754	6.33985e-09	5.86565e-08	NOT_CHANGE	ornithine carbamoyltransferase	Cytoplasmic [Class 3]
98	PA14_18740	PA3525	argG	112.934	0.851144	0.184089	4.62354	3.77251e-06	2.56459e-05	NOT_CHANGE	argininosuccinate synthase	Cytoplasmic [Class 3]
99	PA14_69500	PA5263	argH	48.9327	1.19899	0.214144	5.599	2.15587e-08	1.90776e-07	NOT_CHANGE	argininosuccinate lyase	Cytoplasmic [Class 3]
100	PA14_57210	PA4402	argJ	2508.93	0.24689	0.0816394	3.02416	0.00249326	0.00959854	NOT_CHANGE	bifunctional ornithine acetyltransferase/N-acetylglutamate synthase	Cytoplasmic [Class 3]
101	PA14_52740	PA0893	argR	502.51	0.180033	0.162881	1.1053	0.269029	0.422983	NOT_CHANGE	transcriptional regulator ArgR	Cytoplasmic [Class 3]
102	PA14_66750	PA5051	argS	48.2772	1.27447	0.28055	4.54277	5.55198e-06	3.65211e-05	NOT_CHANGE	arginyl-tRNA synthetase	Cytoplasmic [Class 3]
103	PA14_18330	PA3556	arnT	244.204	-0.00862895	0.106386	-0.0811102	0.935354	0.966261	NOT_CHANGE	4-amino-4-deoxy-L-arabinose transferase	Cytoplasmic Membrane [Class 3]
104	PA14_66600	PA5038	aroB	64.436	0.890233	0.227692	3.90982	9.23666e-05	0.00049535	NOT_CHANGE	3-dehydroquinate synthase	Cytoplasmic [Class 3]
105	PA14_42760	PA1681	aroC	118.928	-0.214986	0.139021	-1.54643	0.122	0.234918	NOT_CHANGE	chorismate synthase	Cytoplasmic [Class 3]
106	PA14_00290	PA0025	aroE	53.1189	1.56704	0.231186	6.77827	1.21626e-11	1.42691e-10	NOT_CHANGE	shikimate 5-dehydrogenase	Cytoplasmic [Class 3]
107	PA14_25980	NA	aroF	2353.3	-0.145168	0.0886948	-1.63671	0.10169	0.203024	NOT_CHANGE	phospho-2-dehydro-3-deoxyheptonate aldolase	Unknown (This protein may have multiple localization sites) [Class 3]
108	PA14_41920	NA	aroF-1	774.613	0.317815	0.0736152	4.31725	1.57988e-05	9.70789e-05	NOT_CHANGE	phospho-2-dehydro-3-deoxyheptonate aldolase	Cytoplasmic [Class 3]
109	PA14_66610	PA5039	aroK	246.049	1.32252	0.129652	10.2005	1.97218e-24	4.715e-23	NOT_CHANGE	shikimate kinase	Cytoplasmic [Class 3]
110	PA14_25270	PA3000	aroP1	570.353	-0.238245	0.117055	-2.03533	0.0418181	0.101124	NOT_CHANGE	aromatic amino acid transport protein AroP1	Cytoplasmic Membrane [Class 3]
111	PA14_53050	PA0866	aroP2	533.788	-0.415755	0.136923	-3.03642	0.00239403	0.00924782	NOT_CHANGE	aromatic amino acid transport protein AroP2	Cytoplasmic Membrane [Class 3]
112	PA14_64090	PA4846	aroQ1	1403.4	0.754292	0.0854328	8.82907	1.05546e-18	1.86557e-17	NOT_CHANGE	3-dehydroquinate dehydratase	Cytoplasmic [Class 3]
113	PA14_03030	PA0245	aroQ2	182.193	0.246208	0.132967	1.85164	0.0640768	0.141262	NOT_CHANGE	3-dehydroquinate dehydratase	Cytoplasmic [Class 3]
114	PA14_35110	PA2278	arsB	104.937	0.177383	0.182975	0.969437	0.332327	0.491281	NOT_CHANGE	arsenite-antimonite efflux pump ArsB	Cytoplasmic Membrane [Class 3]
115	PA14_35100	PA2279	arsC	2423.05	-0.587415	0.0589461	-9.96528	2.16261e-23	4.84458e-22	NOT_CHANGE	arsenate reductase	Cytoplasmic [Class 3]
116	PA14_35130	PA2277	arsR	1599.62	-0.787931	0.0664405	-11.8592	1.92787e-32	6.26835e-31	NOT_CHANGE	arsenic resistance transcriptional regulator	Unknown [Class 3]
117	PA14_52660	PA0899	aruB	744.996	0.110774	0.0890774	1.24357	0.213657	0.358349	NOT_CHANGE	succinylarginine dihydrolase	Cytoplasmic [Class 3]
118	PA14_52630	PA0901	aruE	117.292	0.236486	0.183129	1.29136	0.196577	0.336989	NOT_CHANGE	succinylglutamate desuccinylase	Cytoplasmic [Class 3]
119	PA14_52700	PA0896	aruF	2797.5	0.343998	0.0978462	3.5157	0.000438588	0.00206075	NOT_CHANGE	arginine/ornithine succinyltransferase AI subunit	Cytoplasmic [Class 3]
120	PA14_52690	PA0897	aruG	326.839	0.00170544	0.115765	0.014732	0.988246	0.993989	NOT_CHANGE	arginine/ornithine succinyltransferase AII subunit	Cytoplasmic [Class 3]
121	PA14_23800	PA3117	asd	91.8418	0.714913	0.154431	4.62933	3.66852e-06	2.49687e-05	NOT_CHANGE	aspartate-semialdehyde dehydrogenase	Cytoplasmic [Class 3]
122	PA14_71650	PA5429	aspA	173.79	-0.485584	0.160025	-3.03442	0.00240996	0.00929674	NOT_CHANGE	aspartate ammonia-lyase	Cytoplasmic [Class 3]
123	PA14_65770	NA	aspC	65.9122	-0.172563	0.213627	-0.807777	0.419219	0.576211	NOT_CHANGE	aspartate transaminase	Cytoplasmic [Class 3]
124	PA14_51820	PA0963	aspS	178.748	-0.000186861	0.114756	-0.00162834	0.998701	0.998876	NOT_CHANGE	aspartyl-tRNA synthetase	Cytoplasmic [Class 3]
125	PA14_52670	NA	astD	2569.29	0.250012	0.0793142	3.15218	0.00162057	0.00659095	NOT_CHANGE	succinylglutamic semialdehyde dehydrogenase	Cytoplasmic [Class 3]
126	PA14_38630	PA2001	atoB	623.931	-0.0322766	0.0975896	-0.330738	0.740842	0.837884	NOT_CHANGE	acetyl-CoA acetyltransferase	Cytoplasmic [Class 3]
127	PA14_73260	PA5556	atpA	292.955	0.711431	0.105906	6.71754	1.84815e-11	2.13914e-10	NOT_CHANGE	F0F1 ATP synthase subunit alpha	Cytoplasmic [Class 3]
128	PA14_73310	PA5560	atpB	2.73036	2.02928	1.00337	2.02248	0.0431273	0.103849	NOT_CHANGE	F0F1 ATP synthase subunit A	Cytoplasmic Membrane [Class 3]
129	PA14_73230	PA5553	atpC	49.0525	0.0228418	0.260663	0.0876297	0.930171	0.964584	NOT_CHANGE	F0F1 ATP synthase subunit epsilon	Cytoplasmic [Class 3]
130	PA14_73240	PA5554	atpD	2.96374	1.98071	1.00173	1.97729	0.048009	0.112834	NOT_CHANGE	F0F1 ATP synthase subunit beta	Cytoplasmic [Class 3]
131	PA14_73300	PA5559	atpE	21.5436	-0.121605	0.303489	-0.400688	0.68865	0.800494	NOT_CHANGE	F0F1 ATP synthase subunit C	Cytoplasmic Membrane [Class 3]
132	PA14_73290	PA5558	atpF	530.84	0.0217314	0.099655	0.218066	0.827378	0.901873	NOT_CHANGE	F0F1 ATP synthase subunit B	Cytoplasmic Membrane [Class 3]
133	PA14_73250	PA5555	atpG	355.618	0.378965	0.0936643	4.04599	5.21033e-05	0.000292952	NOT_CHANGE	F0F1 ATP synthase subunit gamma	Cytoplasmic [Class 3]
134	PA14_73280	PA5557	atpH	1022.11	0.165641	0.092762	1.78565	0.0741559	0.157678	NOT_CHANGE	F0F1 ATP synthase subunit delta	Cytoplasmic [Class 3]
135	PA14_73320	PA5561	atpI	250.402	-0.273256	0.127903	-2.13643	0.032644	0.0830066	NOT_CHANGE	F0F1 ATP synthase subunit I	Cytoplasmic Membrane [Class 3]
136	PA14_02310	PA0183	atsA	272.741	-0.0448794	0.108667	-0.412999	0.679607	0.795267	NOT_CHANGE	arylsulfatase	Cytoplasmic [Class 3]
137	PA14_26570	PA2899	atvR	197.212	-0.390415	0.133195	-2.93115	0.00337705	0.0124452	NOT_CHANGE	atypical virulence-related response regulator AtvR	Cytoplasmic [Class 3]
138	PA14_65000	PA4922	azu	1364.01	-0.192037	0.0838113	-2.29131	0.0219457	0.0599764	NOT_CHANGE	azurin	Periplasmic [Class 3]
139	PA14_39190	PA1959	bacA	1532.25	-0.239735	0.12035	-1.99199	0.0463722	0.109758	NOT_CHANGE	UDP pyrophosphate phosphatase	Cytoplasmic Membrane [Class 3]
140	PA14_51290	PA1008	bcp	2572.85	0.10862	0.0485948	2.23522	0.0254029	0.0677966	NOT_CHANGE	bacterioferritin comigratory protein	Cytoplasmic [Class 3]
141	PA14_38590	PA2003	bdhA	682.335	0.0576927	0.0798568	0.722451	0.470017	0.622532	NOT_CHANGE	3-hydroxybutyrate dehydrogenase	Cytoplasmic [Class 3]
142	PA14_32130	NA	benD	1618.82	0.168838	0.0995832	1.69544	0.0899915	0.183137	NOT_CHANGE	1,6-dihydroxycyclohexa-2,4-diene-1-carboxylate dehydrogenase	Cytoplasmic [Class 3]
143	PA14_70940	PA5372	betA	53.5097	0.314356	0.193653	1.6233	0.104526	0.207159	NOT_CHANGE	choline dehydrogenase	Cytoplasmic Membrane [Class 3]
144	PA14_70950	PA5373	betB	428.408	0.119803	0.0974063	1.22993	0.218722	0.363684	NOT_CHANGE	betaine aldehyde dehydrogenase	Cytoplasmic [Class 3]
145	PA14_00380	PA0031	betC	538.018	0.111822	0.0878759	1.2725	0.203197	0.344617	NOT_CHANGE	choline sulfatase	Cytoplasmic [Class 3]
146	PA14_70970	PA5374	betI	676.838	-0.23023	0.081379	-2.82911	0.00466775	0.0163645	NOT_CHANGE	transcriptional regulator BetI	Unknown [Class 3]
147	PA14_70980	PA5375	betT1	1217.71	0.0181448	0.0610009	0.297451	0.766122	0.856432	NOT_CHANGE	choline transporter BetT	Cytoplasmic Membrane [Class 3]
148	PA14_09160	NA	bfrA	306.998	0.606637	0.103128	5.88236	4.04446e-09	3.82275e-08	NOT_CHANGE	bacterioferritin	Cytoplasmic [Class 3]
149	PA14_18670	PA3531	bfrB	5024.81	2.69633	0.153895	17.5206	9.97737e-69	9.30676e-67	UP	bacterioferritin	Cytoplasmic [Class 3]
150	PA14_56790	PA4367	bifA	344.136	-0.113212	0.125451	-0.902443	0.366822	0.525482	NOT_CHANGE	BifA	Cytoplasmic Membrane [Class 3]
151	PA14_05460	PA0420	bioA	287.565	-0.218414	0.0907873	-2.40578	0.0161381	0.0465176	NOT_CHANGE	adenosylmethionine-8-amino-7-oxononanoate aminotransferase	Cytoplasmic [Class 3]
152	PA14_06500	PA0500	bioB	2361.43	0.729242	0.259385	2.81143	0.00493219	0.0172067	NOT_CHANGE	biotin synthase	Cytoplasmic [Class 3]
153	PA14_06570	PA0504	bioD	152.327	0.134942	0.124172	1.08673	0.277157	0.432298	NOT_CHANGE	dithiobiotin synthetase	Cytoplasmic [Class 3]
154	PA14_06510	PA0501	bioF	15.0859	0.524129	0.442656	1.18405	0.236391	0.384415	NOT_CHANGE	8-amino-7-oxononanoate synthase	Cytoplasmic [Class 3]
155	PA14_08620	PA4280	birA	86.046	0.473981	0.160422	2.95459	0.00313081	0.0116662	NOT_CHANGE	biotin--protein ligase	Cytoplasmic [Class 3]
156	PA14_35530	PA2247	bkdA1	1636.28	0.0913451	0.125983	0.72506	0.468415	0.621278	NOT_CHANGE	2-oxoisovalerate dehydrogenase subunit alpha	Cytoplasmic [Class 3]
157	PA14_35520	PA2248	bkdA2	204.287	0.0886842	0.111824	0.793072	0.427736	0.58323	NOT_CHANGE	2-oxoisovalerate dehydrogenase subunit beta	Cytoplasmic [Class 3]
158	PA14_35500	PA2249	bkdB	1872.97	-0.112351	0.0573055	-1.96057	0.0499297	0.116435	NOT_CHANGE	branched-chain alpha-keto acid dehydrogenase subunit E2	Cytoplasmic [Class 3]
159	PA14_35540	PA2246	bkdR	227.559	0.128964	0.118225	1.09084	0.275343	0.430131	NOT_CHANGE	transcriptional regulator BkdR	Cytoplasmic [Class 3]
160	PA14_67450	PA5107	blc	231.288	-0.102894	0.113689	-0.905047	0.365441	0.523965	NOT_CHANGE	outer membrane lipoprotein Blc	Outer Membrane [Class 3]
161	PA14_53190	PA0857	bolA	1002.25	-0.142006	0.0948054	-1.49786	0.134169	0.252286	NOT_CHANGE	morphogene protein BolA	Unknown [Class 3]
162	PA14_29730	PA2657	bqsR	1360.33	-0.290964	0.0929041	-3.13188	0.00173693	0.00697961	NOT_CHANGE	two-component response regulator BqsR	Cytoplasmic [Class 3]
163	PA14_29740	PA2656	bqsS	919.389	-0.26513	0.0855626	-3.09866	0.00194397	0.00769741	NOT_CHANGE	two-component sensor BqsS	Cytoplasmic Membrane [Class 3]
164	PA14_43920	PA1590	braB	305.49	0.0477012	0.108141	0.441101	0.65914	0.779407	NOT_CHANGE	branched chain amino acid transporter	Cytoplasmic Membrane [Class 3]
165	PA14_50520	PA1074	braC	369.204	0.105536	0.109994	0.959473	0.33732	0.496527	NOT_CHANGE	branched-chain amino acid transport protein BraC	Periplasmic [Class 3]
166	PA14_50530	PA1073	braD	11.0644	-0.211873	0.47265	-0.448267	0.653961	0.775377	NOT_CHANGE	branched-chain amino acid transport protein BraD	Cytoplasmic Membrane [Class 3]
167	PA14_50560	PA1070	braG	1032.38	0.356668	0.0825134	4.32255	1.54237e-05	9.49796e-05	NOT_CHANGE	branched-chain amino acid transport protein BraG	Cytoplasmic Membrane [Class 3]
168	PA14_39050	PA1971	braZ	915.263	-0.824096	0.093501	-8.81377	1.21011e-18	2.12516e-17	NOT_CHANGE	branched-chain amino acid transport carrier	Cytoplasmic Membrane [Class 3]
169	PA14_26880	NA	bvlR	299.15	-0.253976	0.124657	-2.0374	0.0416104	0.100922	NOT_CHANGE	BvlR	Cytoplasmic [Class 3]
170	PA14_58100	PA4477	cafA	1113	-0.0171116	0.111893	-0.152928	0.878455	0.933933	NOT_CHANGE	cytoplasmic axial filament protein	Cytoplasmic [Class 3]
171	PA14_21760	PA3266	capB	919.444	0.110549	0.0978003	1.13036	0.258325	0.409891	NOT_CHANGE	cold acclimation protein B	Cytoplasmic [Class 3]
172	PA14_62930	PA4758	carA	102.825	1.0691	0.221113	4.83509	1.33087e-06	9.53734e-06	NOT_CHANGE	carbamoyl phosphate synthase small subunit	Cytoplasmic [Class 3]
173	PA14_62910	PA4756	carB	744.604	0.508981	0.18022	2.82422	0.00473957	0.0165856	NOT_CHANGE	carbamoyl phosphate synthase large subunit	Cytoplasmic [Class 3]
174	PA14_55170	PA0706	cat	66.5219	-0.214224	0.181927	-1.17753	0.238985	0.386973	NOT_CHANGE	chloramphenicol acetyltransferase	Unknown [Class 3]
175	PA14_32240	PA2507	catA	409.779	0.116183	0.0890764	1.30431	0.192129	0.331278	NOT_CHANGE	catechol 1,2-dioxygenase	Cytoplasmic [Class 3]
176	PA14_32220	PA2509	catB	2134.89	-0.0722436	0.0731632	-0.987431	0.323431	0.482771	NOT_CHANGE	muconate cycloisomerase I	Cytoplasmic [Class 3]
177	PA14_32230	PA2508	catC	2777.73	-0.0743885	0.0520178	-1.43006	0.1527	0.278478	NOT_CHANGE	muconolactone delta-isomerase	Cytoplasmic [Class 3]
178	PA14_32200	PA2510	catR	1022.66	-0.449226	0.0887894	-5.05945	4.20465e-07	3.25503e-06	NOT_CHANGE	transcriptional regulator CatR	Cytoplasmic [Class 3]
179	PA14_26470	PA2908	cbiD	4807.44	2.29589	0.0949433	24.1816	3.4712e-129	8.58745e-127	UP	cobalt-precorrin-6A synthase	Cytoplasmic [Class 3]
180	PA14_62530	PA4725	cbrA	487.92	0.132005	0.0826204	1.59773	0.110104	0.215437	NOT_CHANGE	two-component sensor CbrA	Cytoplasmic Membrane [Class 3]
181	PA14_62540	PA4726	cbrB	141.326	0.00358606	0.161635	0.0221861	0.982299	0.990657	NOT_CHANGE	two-component response regulator CbrB	Cytoplasmic [Class 3]
182	PA14_72460	PA5490	cc4	195.782	0.683771	0.116903	5.84906	4.94367e-09	4.63418e-08	NOT_CHANGE	cytochrome c4	Periplasmic [Class 3]
183	PA14_07620	PA0584	cca	1673.15	0.959095	0.0778613	12.318	7.24709e-35	2.67766e-33	NOT_CHANGE	multifunctional tRNA nucleotidyl transferase/2'3'-cyclic phosphodiesterase/2'nucleotidase/phosphatase	Cytoplasmic [Class 3]
184	PA14_45380	PA1475	ccmA	77.7314	1.49556	0.248722	6.01297	1.82154e-09	1.7778e-08	NOT_CHANGE	cytochrome c biogenesis protein CcmA	Cytoplasmic Membrane [Class 3]
185	PA14_45370	PA1476	ccmB	858.852	0.0633018	0.0793003	0.798254	0.424723	0.580792	NOT_CHANGE	heme exporter protein CcmB	Cytoplasmic Membrane [Class 3]
186	PA14_45350	PA1477	ccmC	56.6822	0.59808	0.246013	2.43109	0.0150534	0.0441061	NOT_CHANGE	heme exporter protein CcmC	Cytoplasmic Membrane [Class 3]
187	PA14_45330	PA1479	ccmE	401.405	1.09423	0.131624	8.31332	9.30641e-17	1.52165e-15	NOT_CHANGE	cytochrome c-type biogenesis protein CcmE	Unknown [Class 3]
188	PA14_45300	PA1481	ccmG	1071.19	-0.341322	0.0893037	-3.82204	0.000132354	0.000687759	NOT_CHANGE	cytochrome C biogenesis protein CcmG	Cytoplasmic Membrane [Class 3]
189	PA14_45290	PA1482	ccmH	172.384	1.52582	0.132344	11.5291	9.40838e-31	2.86276e-29	NOT_CHANGE	cytochrome C-type biogenesis protein CcmH	Cytoplasmic Membrane [Class 3]
190	PA14_40510	NA	ccoN-2	787.614	0.11744	0.0709569	1.65508	0.0979077	0.196368	NOT_CHANGE	cbb3-type cytochrome c oxidase subunit I	Cytoplasmic Membrane [Class 3]
191	PA14_60700	PA4587	ccpR	263.357	-0.240221	0.111008	-2.16401	0.0304639	0.0784342	NOT_CHANGE	cytochrome c551 peroxidase	Periplasmic [Class 3]
192	PA14_17120	PA3651	cdsA	432.707	-0.406943	0.0986523	-4.12502	3.70699e-05	0.000212415	NOT_CHANGE	phosphatidate cytidylyltransferase	Cytoplasmic Membrane [Class 3]
193	PA14_02250	NA	cheA	894.799	-0.0833052	0.0648328	-1.28492	0.198819	0.339417	NOT_CHANGE	two-component sensor	Cytoplasmic [Class 3]
194	PA14_02180	NA	cheB	2829.65	-0.079515	0.0640069	-1.24229	0.214131	0.35875	NOT_CHANGE	chemotaxis-specific methylesterase	Cytoplasmic [Class 3]
195	PA14_02230	NA	cheW	2298.24	-0.364763	0.0966814	-3.77284	0.000161402	0.000827366	NOT_CHANGE	purine-binding chemotaxis protein	Cytoplasmic [Class 3]
196	PA14_45620	PA1456	cheY	1401.33	1.19582	0.462011	2.58829	0.00964531	0.0304208	NOT_CHANGE	two-component response regulator CheY	Cytoplasmic [Class 3]
197	PA14_45610	PA1457	cheZ	3892.94	0.0940783	0.165672	0.56786	0.57013	0.708229	NOT_CHANGE	chemotaxis protein CheZ	Cytoplasmic [Class 3]
198	PA14_34870	PA2300	chiC	443.711	-0.227303	0.0857046	-2.65216	0.00799778	0.0259894	NOT_CHANGE	chitinase	Extracellular [Class 3]
199	PA14_05390	PA0413	chpA	1346.22	0.0673558	0.0930831	0.72361	0.469305	0.622023	NOT_CHANGE	ChpA	Cytoplasmic [Class 3]
200	PA14_13030	PA3930	cioA	66.2159	0.102055	0.187669	0.543803	0.586577	0.722158	NOT_CHANGE	CioA, cyanide insensitive terminal oxidase	Cytoplasmic Membrane [Class 3]
201	PA14_13040	PA3929	cioB	517.385	0.274856	0.0800503	3.43354	0.000595757	0.00270755	NOT_CHANGE	CioB, cyanide insensitive terminal oxidase	Cytoplasmic Membrane [Class 3]
202	PA14_72280	PA5476	citA	7.93297	0.47389	0.539262	0.878776	0.379523	0.538525	NOT_CHANGE	citrate transporter	Cytoplasmic Membrane [Class 3]
203	PA14_30230	PA2620	clpA	230.227	0.150418	0.108786	1.3827	0.166756	0.298097	NOT_CHANGE	ATP-dependent Clp protease, ATP-binding subunit ClpA	Cytoplasmic [Class 3]
204	PA14_41240	PA1801	clpP	23.8522	0.688099	0.279382	2.46293	0.0137808	0.040968	NOT_CHANGE	ATP-dependent Clp protease proteolytic subunit	Cytoplasmic [Class 3]
205	PA14_30210	PA2621	clpS	1069.22	0.271214	0.0763921	3.55029	0.000384808	0.0018338	NOT_CHANGE	ATP-dependent Clp protease adaptor protein ClpS	Cytoplasmic [Class 3]
206	PA14_01100	PA0090	clpV1	2741.72	0.38034	0.116184	3.2736	0.00106185	0.00452919	NOT_CHANGE	ClpV1	Cytoplasmic [Class 3]
207	PA14_42980	PA1662	clpV2	141.605	0.0660535	0.131657	0.501711	0.615871	0.746232	NOT_CHANGE	ClpV2	Cytoplasmic [Class 3]
208	PA14_41230	PA1802	clpX	649.209	-0.177539	0.0749941	-2.36738	0.0179147	0.0506991	NOT_CHANGE	ATP-dependent protease ATP-binding subunit ClpX	Cytoplasmic [Class 3]
209	PA14_71220	PA5394	cls	1355.58	0.697881	0.071405	9.77355	1.46229e-22	3.15168e-21	NOT_CHANGE	cardiolipin synthetase	Cytoplasmic Membrane [Class 3]
210	PA14_23320	PA3163	cmk	1.49052	-0.45365	1.13863	-0.398418	0.690322	0.801344	NOT_CHANGE	cytidylate kinase	Cytoplasmic [Class 3]
211	PA14_38040	PA2047	cmrA	800.412	0.202354	0.0953613	2.12197	0.0338404	0.0855787	NOT_CHANGE	chloramphenicol resistance activator CmrA	Cytoplasmic [Class 3]
212	PA14_63910	PA4834	cntI	2360.39	-0.121714	0.0815326	-1.49283	0.135482	0.253898	NOT_CHANGE	CntI	Cytoplasmic Membrane [Class 3]
213	PA14_63940	PA4836	cntL	1738.97	0.441876	0.0605304	7.30007	2.87625e-13	3.70269e-12	NOT_CHANGE	CntL	Cytoplasmic [Class 3]
214	PA14_63920	PA4835	cntM	3.77711	1.06385	0.827083	1.28627	0.19835	0.339024	NOT_CHANGE	CntM	Unknown [Class 3]
215	PA14_63960	PA4837	cntO	2598.96	-0.132411	0.0589905	-2.24462	0.0247924	0.0665554	NOT_CHANGE	CntO	Outer Membrane [Class 3]
216	PA14_48940	PA0723	coaB	1285.75	0.782719	0.068198	11.4772	1.71829e-30	5.20056e-29	NOT_CHANGE	coat protein B of bacteriophage Pf1)	Unknown [Class 3]
217	PA14_70240	PA5320	coaC	663.261	0.404577	0.0990918	4.08285	4.44864e-05	0.000251868	NOT_CHANGE	bifunctional phosphopantothenoylcysteine decarboxylase/phosphopantothenate synthase	Cytoplasmic [Class 3]
218	PA14_04760	PA0363	coaD	158.803	0.521522	0.123228	4.23215	2.31464e-05	0.000137477	NOT_CHANGE	phosphopantetheine adenylyltransferase	Cytoplasmic [Class 3]
219	PA14_58780	PA4529	coaE	5.6028	0.570926	0.614225	0.929506	0.352627	0.510706	NOT_CHANGE	dephospho-CoA kinase	Cytoplasmic [Class 3]
220	PA14_41563	PA1778	cobA	138.267	-0.0944907	0.128199	-0.737064	0.461084	0.614706	NOT_CHANGE	uroporphyrin-III C-methyltransferase	Cytoplasmic [Class 3]
221	PA14_47760	PA1273	cobB	383.764	-0.077855	0.0937321	-0.830612	0.406193	0.563729	NOT_CHANGE	cobyrinic acid a,c-diamide synthase	Cytoplasmic [Class 3]
222	PA14_47720	PA1276	cobC	239.507	0.0211706	0.113517	0.186497	0.852055	0.916962	NOT_CHANGE	threonine-phosphate decarboxylase	Cytoplasmic [Class 3]
223	PA14_47730	PA1275	cobD	443.05	-0.17121	0.091678	-1.86752	0.0618296	0.138031	NOT_CHANGE	cobalamin biosynthesis protein	Cytoplasmic Membrane [Class 3]
224	PA14_26500	PA2905	cobH	578.075	-0.632268	0.0992208	-6.37233	1.86178e-10	1.99502e-09	NOT_CHANGE	precorrin-8X methylmutase	Cytoplasmic [Class 3]
225	PA14_26510	PA2904	cobI	845.666	-0.160744	0.0846484	-1.89897	0.057569	0.130661	NOT_CHANGE	precorrin-2 C(20)-methyltransferase	Cytoplasmic [Class 3]
226	PA14_26530	PA2903	cobJ	499.608	-0.286368	0.0872754	-3.28119	0.00103369	0.00443231	NOT_CHANGE	precorrin-3 methylase CobJ	Cytoplasmic [Class 3]
227	PA14_26460	NA	cobK	1868.12	-0.362861	0.120213	-3.01849	0.00254036	0.00973378	NOT_CHANGE	cobalt-precorrin-6x reductase	Cytoplasmic [Class 3]
228	PA14_26480	PA2907	cobL	352.373	0.153837	0.0879295	1.74955	0.0801965	0.167641	NOT_CHANGE	precorrin-6y-dependent methyltransferase CobL	Cytoplasmic [Class 3]
229	PA14_25920	PA2948	cobM	1445.37	0.160802	0.0599144	2.68387	0.00727753	0.0240192	NOT_CHANGE	precorrin-3 methylase	Cytoplasmic [Class 3]
230	PA14_25970	PA2944	cobN	885.005	0.216076	0.0931553	2.31952	0.0203668	0.0561741	NOT_CHANGE	cobaltochelatase subunit CobN	Cytoplasmic [Class 3]
231	PA14_39640	PA2944	cobN	717.328	0.051986	0.0708274	0.733982	0.46296	0.616341	NOT_CHANGE	cobaltochelatase subunit CobN	Unknown (This protein may have multiple localization sites) [Class 3]
232	PA14_47790	PA1272	cobO	3301.94	0.55782	0.135091	4.12923	3.63978e-05	0.000208984	NOT_CHANGE	cob(I)yrinic acid a,c-diamide adenosyltransferase	Cytoplasmic [Class 3]
233	PA14_47690	PA1277	cobQ	2.15214	-0.408074	0.93769	-0.435191	0.663424	0.783008	NOT_CHANGE	cobyric acid synthase	Cytoplasmic [Class 3]
234	PA14_47650	NA	cobS	443.648	-0.114992	0.103477	-1.11128	0.266449	0.419854	NOT_CHANGE	cobalamin synthase	Cytoplasmic Membrane [Class 3]
235	PA14_47670	NA	cobT	923.85	-0.115963	0.085408	-1.35775	0.174542	0.308047	NOT_CHANGE	nicotinate-nucleotide--dimethylbenzimidazole phosphoribosyltransferase	Cytoplasmic [Class 3]
236	PA14_47680	PA1279	cobU	29.9285	-0.178787	0.260031	-0.68756	0.49173	0.640345	NOT_CHANGE	adenosylcobinamide kinase/adenosylcobinamide-phosphate guanylyltransferase	Cytoplasmic [Class 3]
237	PA14_05690	PA0437	codA	1328.22	-0.0584988	0.118835	-0.49227	0.622528	0.750611	NOT_CHANGE	cytosine deaminase	Cytoplasmic [Class 3]
238	PA14_05700	PA0438	codB	1419.2	0.0268575	0.0644252	0.416879	0.676767	0.792836	NOT_CHANGE	cytosine permease	Cytoplasmic Membrane [Class 3]
239	PA14_01320	PA0108	coIII	506.464	0.394053	0.123598	3.18818	0.00143173	0.00592906	NOT_CHANGE	cytochrome c oxidase subunit III	Cytoplasmic Membrane [Class 3]
240	PA14_60230	PA4545	comL	449.9	-0.343333	0.164821	-2.08307	0.037245	0.0925029	NOT_CHANGE	competence protein ComL	Outer Membrane [Class 3]
241	PA14_69570	PA5268	corA	1105.65	0.239244	0.0824556	2.90149	0.00371395	0.0134641	NOT_CHANGE	magnesium/cobalt transport protein	Cytoplasmic Membrane [Class 3]
242	PA14_01290	PA0105	coxB	661.357	-0.0809286	0.078349	-1.03292	0.301639	0.460511	NOT_CHANGE	cytochrome c oxidase subunit II	Cytoplasmic Membrane [Class 3]
243	PA14_53250	NA	cpbD	72.1395	0.386978	0.172094	2.24865	0.0245348	0.0660063	NOT_CHANGE	chitin-binding protein CbpD	Extracellular [Class 3]
244	PA14_28060	PA2787	cpg2	9.20215	0.707888	0.588757	1.20234	0.22923	0.375993	NOT_CHANGE	glutamate carboxypeptidase	Unknown (This protein may have multiple localization sites) [Class 3]
245	PA14_29020	PA2717	cpo	1467.51	-0.485244	0.0913851	-5.30988	1.09696e-07	9.03284e-07	NOT_CHANGE	chloroperoxidase	Cytoplasmic [Class 3]
246	PA14_22760	PA3204	cpxR	213.359	-0.0619051	0.115195	-0.537395	0.590995	0.725672	NOT_CHANGE	two-component response regulator	Cytoplasmic [Class 3]
247	PA14_22730	PA3206	cpxS	386.919	0.195539	0.106925	1.82875	0.067437	0.147074	NOT_CHANGE	CpxS	Cytoplasmic Membrane [Class 3]
248	PA14_70390	PA5332	crc	376.11	-1.33465	0.184433	-7.23649	4.6046e-13	5.80936e-12	NOT_CHANGE	catabolite repression control protein	Cytoplasmic [Class 3]
249	PA14_06060	PA0463	creB	531.878	0.100021	0.0895597	1.11681	0.264077	0.416578	NOT_CHANGE	DNA-binding response regulator CreB	Cytoplasmic [Class 3]
250	PA14_06070	PA0464	creC	1471.31	-0.00452782	0.0765413	-0.0591552	0.952828	0.975107	NOT_CHANGE	sensory histidine kinase CreC	Cytoplasmic Membrane [Class 3]
251	PA14_06080	PA0465	creD	295.083	-0.0483604	0.103523	-0.467148	0.640394	0.76487	NOT_CHANGE	hypothetical protein	Cytoplasmic Membrane [Class 3]
252	PA14_59160	NA	crpP	468.044	0.0516165	0.0786764	0.656061	0.511785	0.659283	NOT_CHANGE	CrpP	Unknown [Class 3]
253	PA14_22570	PA3221	csaA	460.002	0.306185	0.0973602	3.14487	0.00166161	0.00673401	NOT_CHANGE	CsaA protein	Cytoplasmic [Class 3]
254	PA14_30200	PA2622	cspD	565.691	-0.312332	0.0828991	-3.76761	0.000164817	0.000843352	NOT_CHANGE	cold-shock protein CspD	Cytoplasmic [Class 3]
255	PA14_40640	PA1846	cti	1905.68	0.00497316	0.071675	0.0693849	0.944683	0.969911	NOT_CHANGE	cis/trans isomerase	Unknown [Class 3]
256	PA14_37060	PA2128	cupA1	407.486	0.0597523	0.0846719	0.705693	0.480379	0.629951	NOT_CHANGE	fimbrial subunit CupA1	Extracellular [Class 3]
257	PA14_37040	PA2129	cupA2	1278.58	0.0277568	0.0649152	0.427586	0.668953	0.786922	NOT_CHANGE	chaperone CupA2	Periplasmic [Class 3]
258	PA14_37030	PA2130	cupA3	982.732	0.0889894	0.0710773	1.25201	0.210567	0.35437	NOT_CHANGE	usher	Outer Membrane [Class 3]
259	PA14_37010	PA2131	cupA4	218.209	0.186187	0.114232	1.6299	0.103122	0.205305	NOT_CHANGE	fimbrial subunit CupA4	Unknown [Class 3]
260	PA14_37000	PA2132	cupA5	615.789	-0.281828	0.0730185	-3.85967	0.00011354	0.000597632	NOT_CHANGE	chaperone CupA5	Periplasmic [Class 3]
261	PA14_11060	PA4086	cupB1	239.275	0.0114883	0.11477	0.100099	0.920266	0.959559	NOT_CHANGE	fimbrial subunit CupB1	Extracellular [Class 3]
262	PA14_11070	PA4085	cupB2	7.2292	0.115197	0.591423	0.19478	0.845565	0.913703	NOT_CHANGE	chaperone CupB2	Periplasmic [Class 3]
263	PA14_11080	PA4084	cupB3	1373.04	-0.164605	0.0813031	-2.02458	0.04291	0.103369	NOT_CHANGE	usher CupB3	Outer Membrane [Class 3]
264	PA14_11090	PA4083	cupB4	1118.55	-0.106625	0.0618894	-1.72284	0.0849178	0.174749	NOT_CHANGE	chaperone CupB4	Periplasmic [Class 3]
265	PA14_11100	PA4082	cupB5	247.372	-0.880829	0.114177	-7.7146	1.21364e-14	1.76164e-13	NOT_CHANGE	adhesive protein CupB5	Extracellular [Class 3]
266	PA14_11110	PA4081	cupB6	84.0252	-0.36972	0.167157	-2.21181	0.02698	0.0711712	NOT_CHANGE	fimbrial protein cupB6	Unknown [Class 3]
267	PA14_51470	PA0992	cupC1	297.981	0.00826529	0.100724	0.082059	0.9346	0.966008	NOT_CHANGE	fimbrial subunit CupC1	Extracellular [Class 3]
268	PA14_51460	PA0993	cupC2	19.2595	-0.112956	0.321845	-0.350966	0.725614	0.826907	NOT_CHANGE	chaperone CupC	Periplasmic [Class 3]
269	PA14_51450	PA0994	cupC3	318.295	0.194631	0.0964662	2.01761	0.0436318	0.104857	NOT_CHANGE	usher CupC3	Outer Membrane [Class 3]
270	PA14_59710	NA	cupD1	844.558	0.183789	0.0793142	2.31723	0.0204912	0.0564624	NOT_CHANGE	fimbrial protein	Extracellular [Class 3]
271	PA14_59720	NA	cupD2	1525.08	-0.118088	0.0870508	-1.35655	0.174925	0.308532	NOT_CHANGE	pili assembly chaperone	Periplasmic [Class 3]
272	PA14_59735	NA	cupD3	1035.14	-0.162913	0.0739609	-2.20268	0.027617	0.0724819	NOT_CHANGE
273	PA14_59760	NA	cupD5	2708.94	1.15799	0.0645658	17.9351	6.27333e-72	6.26232e-70	NOT_CHANGE	pili assembly chaperone	Periplasmic [Class 3]
274	PA14_23900	NA	cvpA	1732.67	0.7496	0.0804287	9.32005	1.1628e-20	2.29734e-19	NOT_CHANGE	hypothetical protein	Cytoplasmic Membrane [Class 3]
275	PA14_69610	PA5272	cyaA	200.608	-0.580463	0.151591	-3.82913	0.000128595	0.000671291	NOT_CHANGE	adenylate cyclase	Cytoplasmic [Class 3]
276	PA14_22620	PA3217	cyaB	69.8182	-0.332587	0.207596	-1.60209	0.109136	0.213911	NOT_CHANGE	hypothetical protein	Cytoplasmic Membrane [Class 3]
277	PA14_69640	NA	cyaY	5.29129	-0.665543	0.584022	-1.13958	0.254459	0.40534	NOT_CHANGE	frataxin-like protein	Unknown [Class 3]
278	PA14_69970	PA5300	cycB	1033.04	-0.122883	0.0955967	-1.28543	0.198642	0.339217	NOT_CHANGE	cytochrome c5	Unknown [Class 3]
279	PA14_45280	PA1483	cycH	93.8731	0.259042	0.18273	1.41762	0.156302	0.283145	NOT_CHANGE	cytochrome c-type biogenesis protein	Unknown [Class 3]
280	PA14_37940	PA2054	cynR	646.893	0.1919	0.082539	2.32497	0.0200737	0.0554194	NOT_CHANGE	DNA-binding transcriptional regulator CynR	Cytoplasmic [Class 3]
281	PA14_37950	PA2053	cynT	214.909	-0.365391	0.107167	-3.40955	0.000650697	0.00292223	NOT_CHANGE	carbonate dehydratase	Cytoplasmic [Class 3]
282	PA14_47210	PA1317	cyoA	1367.58	0.0408465	0.0761857	0.536144	0.591859	0.725949	NOT_CHANGE	cytochrome o ubiquinol oxidase subunit II	Cytoplasmic Membrane [Class 3]
283	PA14_47190	PA1318	cyoB	1118.1	0.0783472	0.0878501	0.891828	0.372485	0.531454	NOT_CHANGE	cytochrome o ubiquinol oxidase subunit I	Cytoplasmic Membrane [Class 3]
284	PA14_47180	PA1319	cyoC	161.538	-0.441908	0.15079	-2.93062	0.00338287	0.0124586	NOT_CHANGE	cytochrome o ubiquinol oxidase subunit III	Cytoplasmic Membrane [Class 3]
285	PA14_47160	PA1320	cyoD	213	-1.34775	0.136348	-9.88463	4.85383e-23	1.05413e-21	NOT_CHANGE	cytochrome o ubiquinol oxidase subunit IV	Cytoplasmic Membrane [Class 3]
286	PA14_47150	PA1321	cyoE	1994.27	-0.11256	0.0592441	-1.89993	0.0574422	0.130477	NOT_CHANGE	protoheme IX farnesyltransferase	Cytoplasmic Membrane [Class 3]
287	PA14_20970	NA	cyp23	1760.48	0.333945	0.1293	2.58271	0.00980289	0.0308168	NOT_CHANGE	cytochrome P450	Cytoplasmic Membrane [Class 3]
288	PA14_03650	PA0280	cysA	811.847	-1.70914	0.0889675	-19.2108	3.00464e-82	3.7992e-80	NOT_CHANGE	sulfate transport protein CysA	Cytoplasmic Membrane [Class 3]
289	PA14_41870	PA1754	cysB	649.991	-0.98746	0.106228	-9.29567	1.46283e-20	2.8603e-19	NOT_CHANGE	transcriptional regulator CysB	Cytoplasmic [Class 3]
290	PA14_57720	PA4443	cysD	78.7889	0.120593	0.248093	0.486079	0.626911	0.753671	NOT_CHANGE	sulfate adenylyltransferase subunit 2	Cytoplasmic [Class 3]
291	PA14_14700	PA3816	cysE	273.105	-1.61231	0.111407	-14.4723	1.81234e-47	9.82113e-46	NOT_CHANGE	serine O-acetyltransferase	Cytoplasmic [Class 3]
292	PA14_30340	PA2611	cysG	1632.98	-0.194146	0.0677021	-2.86765	0.00413533	0.0147684	NOT_CHANGE	siroheme synthase	Cytoplasmic [Class 3]
293	PA14_40770	PA1838	cysI	163.13	-1.15489	0.129042	-8.94971	3.56416e-19	6.52092e-18	NOT_CHANGE	sulfite reductase	Cytoplasmic [Class 3]
294	PA14_29110	PA2709	cysK	40.8125	-0.164987	0.223392	-0.738555	0.460178	0.613901	NOT_CHANGE	cysteine synthase A	Cytoplasmic [Class 3]
295	PA14_52210	PA0932	cysM	114.443	-1.8253	0.177338	-10.2927	7.59847e-25	1.84766e-23	NOT_CHANGE	cysteine synthase B	Cytoplasmic [Class 3]
296	PA14_57710	PA4442	cysN	145.446	-0.135461	0.174382	-0.77681	0.437271	0.593104	NOT_CHANGE	bifunctional sulfate adenylyltransferase subunit 1/adenylylsulfate kinase	Cytoplasmic [Class 3]
297	PA14_45110	PA1493	cysP	329.147	-0.498433	0.158856	-3.13764	0.00170315	0.0068584	NOT_CHANGE	sulfate-binding protein of ABC transporter	Periplasmic [Class 3]
298	PA14_68370	PA5175	cysQ	712.837	-0.465356	0.0682035	-6.82305	8.91257e-12	1.04995e-10	NOT_CHANGE	3'(2'),5'-bisphosphate nucleotidase	Cytoplasmic [Class 3]
299	PA14_41360	PA1795	cysS	204.85	0.287708	0.120008	2.39742	0.0165111	0.0474486	NOT_CHANGE	cysteinyl-tRNA synthetase	Cytoplasmic [Class 3]
300	PA14_03680	PA0282	cysT	154.416	-1.10029	0.153944	-7.14738	8.84504e-13	1.10369e-11	NOT_CHANGE	sulfate transport protein CysT	Cytoplasmic Membrane [Class 3]
301	PA14_03670	PA0281	cysW	209.608	-0.882829	0.12568	-7.02443	2.14946e-12	2.63587e-11	NOT_CHANGE	sulfate transport protein CysW	Cytoplasmic Membrane [Class 3]
302	PA14_31990	PA2521	czcB	1521.79	0.00354225	0.0791927	0.0447295	0.964323	0.981356	NOT_CHANGE	cobalt/zinc/cadmium efflux RND transporter, membrane fusion protein, CzcB famil	Cytoplasmic [Class 3]
303	PA14_31970	PA2522	czcC	492.743	0.0694023	0.0844358	0.821953	0.411103	0.568175	NOT_CHANGE	CzcC family cobalt/zinc/cadmium efflux transporter outer membrane protein	Outer Membrane [Class 3]
304	PA14_12100	PA3999	dacC	0.0916512	0.148207	3.53381	0.0419396	0.966547	0.981356	NOT_CHANGE	D-ala-D-ala-carboxypeptidase	Cytoplasmic Membrane [Class 3]
305	PA14_70040	PA5304	dadA	2581.46	-0.227299	0.0815631	-2.78679	0.00532332	0.0183463	NOT_CHANGE	D-amino acid dehydrogenase small subunit	Cytoplasmic Membrane [Class 3]
306	PA14_69990	PA5302	dadX	360.905	0.878379	0.135199	6.49691	8.1986e-11	9.0407e-10	NOT_CHANGE	alanine racemase	Cytoplasmic [Class 3]
307	PA14_51270	PA1010	dapA	28.0441	2.06231	0.32705	6.3058	2.86709e-10	3.02107e-09	UP	dihydrodipicolinate synthase	Cytoplasmic [Class 3]
308	PA14_62940	PA4759	dapB	357.816	1.15307	0.199961	5.76649	8.09382e-09	7.40415e-08	NOT_CHANGE	dihydrodipicolinate reductase	Cytoplasmic [Class 3]
309	PA14_16950	PA3666	dapD	628.266	1.07828	0.183564	5.87416	4.24987e-09	4.0036e-08	NOT_CHANGE	tetrahydrodipicolinate succinylase	Unknown [Class 3]
310	PA14_49380	PA1162	dapE	66.5314	-0.0374837	0.191563	-0.195673	0.844866	0.913586	NOT_CHANGE	succinyl-diaminopimelate desuccinylase	Cytoplasmic [Class 3]
311	PA14_69690	PA5278	dapF	361.872	-0.0424278	0.130138	-0.326022	0.744408	0.840287	NOT_CHANGE	diaminopimelate epimerase	Cytoplasmic [Class 3]
312	PA14_05950	PA0455	dbpA	150.127	0.114842	0.12848	0.893855	0.371399	0.530571	NOT_CHANGE	ATP-dependent RNA helicase DbpA	Cytoplasmic [Class 3]
313	PA14_19090	NA	dcd	672.758	0.813272	0.108121	7.52188	5.3996e-14	7.38552e-13	NOT_CHANGE	deoxycytidine triphosphate deaminase	Cytoplasmic [Class 3]
314	PA14_60120	NA	dcd2	2374.19	0.0159523	0.0519493	0.307075	0.758786	0.85057	NOT_CHANGE	deoxycytidine deaminase	Unknown [Class 3]
315	PA14_49130	PA1183	dctA	199.264	-0.130091	0.111503	-1.1667	0.243333	0.392562	NOT_CHANGE	C4-dicarboxylate transporter DctA	Cytoplasmic Membrane [Class 3]
316	PA14_57320	NA	ddl	1584.78	-0.0972384	0.0630916	-1.54123	0.123261	0.236513	NOT_CHANGE	D-alanine--D-alanine ligase	Cytoplasmic [Class 3]
317	PA14_09600	PA4201	ddlA	30.6089	-0.456683	0.281021	-1.62508	0.104145	0.20662	NOT_CHANGE	D-alanine--D-alanine ligase	Cytoplasmic [Class 3]
318	PA14_00200	PA0019	def	114.741	-0.0296347	0.161519	-0.183475	0.854425	0.918439	NOT_CHANGE	peptide deformylase	Cytoplasmic [Class 3]
319	PA14_49840	PA1124	dgt	2843.59	-0.0811597	0.064474	-1.2588	0.208103	0.350951	NOT_CHANGE	deoxyguanosinetriphosphate triphosphohydrolase	Cytoplasmic [Class 3]
320	PA14_05770	NA	dhT	850.238	-0.0743447	0.0906321	-0.820291	0.41205	0.569052	NOT_CHANGE	phenylhydantoinase	Cytoplasmic [Class 3]
321	PA14_50840	NA	dinG	4375.28	0.141147	0.0481996	2.9284	0.00340716	0.0125237	NOT_CHANGE	ATP-dependent DNA helicase DinG	Cytoplasmic [Class 3]
322	PA14_52310	NA	dinP	541.06	0.249602	0.0974817	2.5605	0.0104522	0.0326953	NOT_CHANGE	DNA polymerase IV	Cytoplasmic [Class 3]
323	PA14_64080	PA4845	dipZ	793.994	0.523781	0.0960647	5.45238	4.97005e-08	4.23733e-07	NOT_CHANGE	thiol:disulfide interchange protein	Cytoplasmic Membrane [Class 3]
324	PA14_09980	NA	dkgB	11.9063	0.287626	0.44374	0.648186	0.516865	0.663574	NOT_CHANGE	2,5-diketo-D-gluconate reductase B	Cytoplasmic [Class 3]
325	PA14_62490	PA4723	dksA	714.297	0.43013	0.358054	1.2013	0.229635	0.376549	NOT_CHANGE	suppressor protein DksA	Cytoplasmic [Class 3]
326	PA14_65130	PA4931	dnaB	193.674	0.559766	0.156313	3.58106	0.000342205	0.00165292	NOT_CHANGE	replicative DNA helicase	Cytoplasmic [Class 3]
327	PA14_17260	PA3640	dnaE	218.432	0.279079	0.113522	2.45837	0.0139568	0.04134	NOT_CHANGE	DNA polymerase III subunit alpha	Cytoplasmic [Class 3]
328	PA14_55610	NA	dnaE2	135.09	-0.3567	0.143381	-2.48779	0.012854	0.0387186	NOT_CHANGE	error-prone DNA polymerase	Cytoplasmic [Class 3]
329	PA14_07530	PA0577	dnaG	182.757	0.136967	0.141686	0.966697	0.333696	0.492792	NOT_CHANGE	DNA primase	Cytoplasmic [Class 3]
330	PA14_62960	PA4760	dnaJ	3069.05	1.11488	0.15056	7.40486	1.3129e-13	1.75361e-12	NOT_CHANGE	chaperone protein DnaJ	Cytoplasmic [Class 3]
331	PA14_00020	PA0002	dnaN	126.226	0.440974	0.169317	2.60442	0.00920292	0.0293195	NOT_CHANGE	DNA polymerase III subunit beta	Cytoplasmic [Class 3]
332	PA14_41050	PA1816	dnaQ	608.27	-0.189198	0.102933	-1.83807	0.0660525	0.144665	NOT_CHANGE	DNA polymerase III subunit epsilon	Cytoplasmic [Class 3]
333	PA14_44630	PA1532	dnaX	1.41944	-0.367997	1.45371	-0.253144	0.800157	0.882515	NOT_CHANGE	DNA polymerase III subunits gamma and tau	Cytoplasmic [Class 3]
334	PA14_66140	PA5002	dnpA	817.929	0.216437	0.0784608	2.75854	0.00580603	0.0198178	NOT_CHANGE	de-N-acetylase involved in persistence, DnpA	Cytoplasmic [Class 3]
335	PA14_06870	PA0527	dnr	506.008	-0.323284	0.107462	-3.00835	0.00262669	0.0100173	NOT_CHANGE	transcriptional regulator Dnr	Cytoplasmic [Class 3]
336	PA14_42910	PA1668	dotU2	125.228	-0.248457	0.141823	-1.75188	0.0797942	0.166984	NOT_CHANGE	DotU2	Cytoplasmic [Class 3]
337	PA14_34110	PA2362	dotU3	2144.52	-0.103556	0.0587986	-1.7612	0.0782041	0.164443	NOT_CHANGE	DotU3	Unknown [Class 3]
338	PA14_58350	PA4496	dppA1	525.345	1.62909	0.140774	11.5724	5.68821e-31	1.7401e-29	NOT_CHANGE	dipeptide ABC transporter substrate-binding protein DppA1	Periplasmic [Class 3]
339	PA14_58360	PA4497	dppA2	9057.51	0.422661	0.145356	2.90776	0.00364023	0.0132351	NOT_CHANGE	dipeptide ABC transporter substrate-binding protein DppA2	Periplasmic [Class 3]
340	PA14_58390	PA4500	dppA3	301.312	0.420645	0.151478	2.77693	0.00548754	0.018821	NOT_CHANGE	dipeptide ABC transporter substrate-binding protein DppA3	Periplasmic [Class 3]
341	PA14_58420	PA4502	dppA4	423.485	0.0756792	0.110086	0.687458	0.491794	0.640345	NOT_CHANGE	dipeptide ABC transporter substrate-binding protein DppA4	Periplasmic [Class 3]
342	PA14_70200	PA5317	dppA5	319.933	-0.36771	0.0938109	-3.9197	8.86604e-05	0.000477273	NOT_CHANGE	dipeptide ABC transporter substrate-binding protein DppA5	Periplasmic [Class 3]
343	PA14_58440	PA4503	dppB	5.91441	-0.435853	0.602824	-0.723019	0.469668	0.62236	NOT_CHANGE	dipeptide ABC transporter permease DppB	Cytoplasmic Membrane [Class 3]
344	PA14_58450	PA4504	dppC	1112.63	-0.15108	0.0713729	-2.11677	0.0342795	0.0864586	NOT_CHANGE	dipeptide ABC transporter permease DppC	Cytoplasmic Membrane [Class 3]
345	PA14_58470	PA4505	dppD	370.446	0.157629	0.100179	1.57348	0.115607	0.223886	NOT_CHANGE	dipeptide ABC transporter ATP-binding protein DppD	Cytoplasmic Membrane [Class 3]
346	PA14_58490	PA4506	dppF	2151.1	-0.347273	0.0900214	-3.85767	0.000114473	0.000601338	NOT_CHANGE	dipeptide ABC transporter ATP-binding protein DppF	Cytoplasmic Membrane [Class 3]
347	PA14_72450	NA	dsbA1	1534.55	0.117801	0.0783439	1.50364	0.132673	0.250301	NOT_CHANGE	DsbA1	Periplasmic [Class 3]
348	PA14_59960	NA	dsbA2	141.971	0.00183281	0.150572	0.0121723	0.990288	0.994483	NOT_CHANGE	DsbA2	Unknown [Class 3]
349	PA14_07000	NA	dsbB1	1353.74	0.52795	0.097978	5.38845	7.10684e-08	5.97311e-07	NOT_CHANGE	DsbB1	Cytoplasmic Membrane [Class 3]
350	PA14_69400	NA	dsbB2	2390.98	-0.665398	0.0554135	-12.0079	3.23111e-33	1.1009e-31	NOT_CHANGE	DsbB2	Cytoplasmic Membrane [Class 3]
351	PA14_16050	PA3737	dsbC	304.221	-0.268644	0.116163	-2.31265	0.0207417	0.0570974	NOT_CHANGE	thiol:disulfide interchange protein DsbC	Periplasmic [Class 3]
352	PA14_32610	PA2476	dsbG	2448.33	0.142118	0.103705	1.37041	0.17056	0.302615	NOT_CHANGE	disulfide isomerase/thiol-disulfide oxidase	Periplasmic [Class 3]
353	PA14_20650	PA3357	dsdA	53.3018	-0.328863	0.220831	-1.48921	0.136433	0.255027	NOT_CHANGE	D-serine dehydratase	Cytoplasmic [Class 3]
354	PA14_54640	PA0745	dspI	250.495	0.119522	0.184733	0.646998	0.517633	0.663961	NOT_CHANGE	DspI	Cytoplasmic [Class 3]
355	PA14_60100	NA	dtd	271.796	0.13686	0.118689	1.1531	0.24887	0.39836	NOT_CHANGE	deoxycytidine triphosphate deaminase	Unknown [Class 3]
356	PA14_70260	PA5321	dut	716.813	0.132897	0.0943352	1.40878	0.158901	0.286757	NOT_CHANGE	deoxyuridine 5'-triphosphate nucleotidohydrolase	Unknown [Class 3]
357	PA14_17130	PA3650	dxr	2074.87	-0.585299	0.0735674	-7.95595	1.77759e-15	2.71891e-14	NOT_CHANGE	1-deoxy-D-xylulose 5-phosphate reductoisomerase	Unknown [Class 3]
358	PA14_11550	PA4044	dxs	90.3609	-0.362426	0.176336	-2.05532	0.0398485	0.0975637	NOT_CHANGE	1-deoxy-D-xylulose-5-phosphate synthase	Cytoplasmic [Class 3]
359	PA14_01150	PA0094	eagT6	570.418	-0.0919086	0.0732021	-1.25555	0.209281	0.352727	NOT_CHANGE	EagT6	Unknown [Class 3]
360	PA14_28450	PA2755	eco	197.31	-0.0251616	0.124158	-0.202659	0.839402	0.910445	NOT_CHANGE	ecotin	Periplasmic [Class 3]
361	PA14_22910	PA3194	edd	200.628	-0.246794	0.121112	-2.03773	0.0415771	0.100885	NOT_CHANGE	phosphogluconate dehydratase	Cytoplasmic [Class 3]
362	PA14_27210	PA2851	efp	316.108	0.0926142	0.097382	0.95104	0.341584	0.500544	NOT_CHANGE	elongation factor P	Cytoplasmic [Class 3]
363	PA14_09870	PA4178	eftM	741.939	0.107227	0.0865729	1.23858	0.215503	0.360015	NOT_CHANGE	SAM-dependent methyltransferase , EftM	Cytoplasmic [Class 3]
364	PA14_28570	PA2749	endA	596.882	0.107199	0.0796731	1.34548	0.178469	0.313236	NOT_CHANGE	DNA-specific endonuclease I	Extracellular [Class 3]
365	PA14_14930	NA	engA	310.986	-0.0625667	0.130687	-0.478752	0.632115	0.757609	NOT_CHANGE	GTP-binding protein EngA	Cytoplasmic Membrane [Class 3]
366	PA14_72480	NA	engB	388.22	1.80251	0.193571	9.3119	1.25563e-20	2.47217e-19	NOT_CHANGE	ribosome biogenesis GTP-binding protein YsxC	Unknown [Class 3]
367	PA14_17320	PA3635	eno	237.426	0.475518	0.106673	4.4577	8.28441e-06	5.35055e-05	NOT_CHANGE	phosphopyruvate hydratase	Cytoplasmic [Class 3]
368	PA14_68680	NA	envZ	321.012	-0.243448	0.117315	-2.07517	0.0379706	0.0939621	NOT_CHANGE	two-component sensor EnvZ	Cytoplasmic Membrane [Class 3]
369	PA14_07170	PA0551	epd	158.212	0.149788	0.15984	0.93711	0.348702	0.506843	NOT_CHANGE	D-erythrose 4-phosphate dehydrogenase	Cytoplasmic [Class 3]
370	PA14_54320	PA0771	era	1510.4	-0.0619749	0.0854755	-0.72506	0.468415	0.621278	NOT_CHANGE	GTP-binding protein Era	Cytoplasmic Membrane [Class 3]
371	PA14_72485	PA5492.1	ersA	297.517	-0.0172186	0.0934167	-0.184321	0.853762	0.918145	NOT_CHANGE	ErsA
372	PA14_67510	PA5112	estA	761.729	-0.0754041	0.0689462	-1.09367	0.274102	0.428708	NOT_CHANGE	esterase EstA	Outer Membrane [Class 3]
373	PA14_25880	PA2951	etfA	537.958	-0.120646	0.0930259	-1.2969	0.194664	0.334546	NOT_CHANGE	electron transfer flavoprotein subunit alpha	Unknown [Class 3]
374	PA14_25860	PA2952	etfB	587.09	0.0412838	0.113082	0.36508	0.715052	0.818424	NOT_CHANGE	electron transfer flavoprotein subunit beta	Unknown [Class 3]
375	PA14_11770	PA4024	eutB	2294.86	-0.380551	0.057048	-6.67072	2.54549e-11	2.89099e-10	NOT_CHANGE	ethanolamine ammonia-lyase large subunit	Cytoplasmic [Class 3]
376	PA14_38860	PA1982	exaA	822.428	-0.392609	0.0667304	-5.88352	4.01632e-09	3.80247e-08	NOT_CHANGE	quinoprotein alcohol dehydrogenase	Periplasmic [Class 3]
377	PA14_38850	PA1983	exaB	1481.95	-0.211438	0.083446	-2.53383	0.0112825	0.0348792	NOT_CHANGE	cytochrome c550	Unknown [Class 3]
378	PA14_02500	PA0198	exbB1	147.401	-0.140426	0.140502	-0.999457	0.317574	0.477157	NOT_CHANGE	transport protein ExbB	Cytoplasmic Membrane [Class 3]
379	PA14_55360	PA0693	exbB2	11.615	0.072416	0.49462	0.146407	0.8836	0.936121	NOT_CHANGE	transport protein ExbB2	Cytoplasmic Membrane [Class 3]
380	PA14_02510	PA0199	exbD1	1204.09	-0.116983	0.067208	-1.74061	0.0817514	0.170101	NOT_CHANGE	transport protein ExbD	Cytoplasmic Membrane [Class 3]
381	PA14_55340	PA0694	exbD2	1059.37	-0.114712	0.087427	-1.31209	0.18949	0.32762	NOT_CHANGE	transport protein ExbD	Cytoplasmic Membrane [Class 3]
382	PA14_00560	PA0044	exoT	1439.64	-0.0948775	0.0852454	-1.11299	0.265712	0.418809	NOT_CHANGE	exoenzyme T	Extracellular [Class 3]
383	PA14_51530	NA	exoU	7.10229	2.91251	0.723376	4.02627	5.66691e-05	0.000315506	UP	ExoU	Extracellular [Class 3]
384	PA14_36345	PA2191	exoY	88.9084	-0.025042	0.165469	-0.15134	0.879708	0.934392	NOT_CHANGE	adenylate cyclase	Extracellular [Class 3]
385	PA14_42390	PA1713	exsA	805.205	-0.142294	0.0852197	-1.66973	0.0949736	0.191153	NOT_CHANGE	transcriptional regulator ExsA	Cytoplasmic [Class 3]
386	PA14_42400	PA1712	exsB	888.007	-0.218479	0.0944934	-2.3121	0.0207719	0.057153	NOT_CHANGE	exoenzyme S synthesis protein B	Unknown [Class 3]
387	PA14_42430	PA1710	exsC	774.447	-0.25912	0.090182	-2.8733	0.00406209	0.014555	NOT_CHANGE	exoenzyme S synthesis protein C	Cytoplasmic [Class 3]
388	PA14_43680	PA1610	fabA	731.488	0.464774	0.0977436	4.75503	1.98418e-06	1.39383e-05	NOT_CHANGE	3-hydroxydecanoyl-ACP dehydratase	Cytoplasmic [Class 3]
389	PA14_43690	PA1609	fabB	5.09998	0.12047	0.63882	0.188582	0.850421	0.916008	NOT_CHANGE	3-oxoacyl-ACP synthase	Cytoplasmic [Class 3]
390	PA14_25650	PA2968	fabD	132.381	0.923616	0.146077	6.32281	2.56844e-10	2.72149e-09	NOT_CHANGE	malonyl-CoA-ACP transacylase	Cytoplasmic [Class 3]
391	PA14_25690	PA2965	fabF1	691.189	1.5547	0.111588	13.9325	4.02155e-44	1.95578e-42	NOT_CHANGE	3-oxoacyl-ACP synthase	Cytoplasmic [Class 3]
392	PA14_46490	PA1373	fabF2	1773.97	-0.242712	0.076518	-3.17196	0.00151414	0.00621156	NOT_CHANGE	3-oxoacyl-ACP synthase	Cytoplasmic [Class 3]
393	PA14_25660	PA2967	fabG	22.11	0.964093	0.347269	2.77622	0.00549954	0.0188508	NOT_CHANGE	3-ketoacyl-ACP reductase	Cytoplasmic [Class 3]
394	PA14_02300	PA2967	fabG	251.305	-0.109221	0.100054	-1.09162	0.275001	0.429759	NOT_CHANGE	3-ketoacyl-ACP reductase	Cytoplasmic [Class 3]
395	PA14_63270	PA2967	fabG	794.264	-0.0236615	0.0780322	-0.303227	0.761717	0.852544	NOT_CHANGE	3-ketoacyl-ACP reductase	Cytoplasmic Membrane [Class 3]
396	PA14_57050	PA2967	fabG	1290.02	-0.232159	0.103177	-2.2501	0.0244428	0.0658209	NOT_CHANGE	3-ketoacyl-ACP reductase	Cytoplasmic [Class 3]
397	PA14_20950	PA3333	fabH2	1546.03	-0.0860524	0.0534094	-1.61118	0.10714	0.210724	NOT_CHANGE	3-oxoacyl-ACP synthase	Cytoplasmic [Class 3]
398	PA14_41170	PA1806	fabI	452.696	-0.110553	0.0889591	-1.24273	0.213966	0.358711	NOT_CHANGE	NADH-dependent enoyl-ACP reductase	Cytoplasmic Membrane [Class 3]
399	PA14_17190	PA3645	fabZ	818.269	0.14085	0.0786469	1.79092	0.0733058	0.156455	NOT_CHANGE	(3R)-hydroxymyristoyl-ACP dehydratase	Cytoplasmic [Class 3]
400	PA14_25090	NA	fadA	1538.68	0.221666	0.0736719	3.00883	0.00262253	0.010014	NOT_CHANGE	3-ketoacyl-CoA thiolase	Cytoplasmic [Class 3]
401	PA14_25080	NA	fadB	7640.37	0.496952	0.0472949	10.5075	7.97567e-26	2.05346e-24	NOT_CHANGE	multifunctional fatty acid oxidation complex subunit alpha	Cytoplasmic [Class 3]
402	PA14_21370	PA3299	fadD1	968.195	-0.467821	0.130545	-3.5836	0.000338889	0.0016383	NOT_CHANGE	long-chain-fatty-acid--CoA ligase	Cytoplasmic [Class 3]
403	PA14_21340	PA3300	fadD2	961.289	0.14302	0.0661473	2.16215	0.0306069	0.0786956	NOT_CHANGE	long-chain-fatty-acid--CoA ligase	Cytoplasmic [Class 3]
404	PA14_27730	NA	fadE	456.13	-0.188534	0.0955272	-1.97362	0.0484251	0.113577	NOT_CHANGE	acyl-CoA dehydrogenase	Cytoplasmic Membrane [Class 3]
405	PA14_24170	PA3092	fadH1	18.2362	2.05402	0.384553	5.34132	9.22733e-08	7.68719e-07	UP	2,4-dienoyl-CoA reductase	Cytoplasmic [Class 3]
406	PA14_63640	PA4814	fadH2	775.716	0.405918	0.0837956	4.84415	1.27155e-06	9.14678e-06	NOT_CHANGE	2,4-dienoyl-CoA reductase	Cytoplasmic [Class 3]
407	PA14_38530	PA2008	fahA	1041	0.196607	0.0910765	2.1587	0.0308734	0.0792732	NOT_CHANGE	fumarylacetoacetase	Cytoplasmic [Class 3]
408	PA14_67490	PA5110	fbp	0.394652	0.709148	2.16315	0.327831	0.74304	0.839201	NOT_CHANGE	fructose-1,6-bisphosphatase	Cytoplasmic [Class 3]
409	PA14_07230	PA0555	fda	4.91567	-0.246965	0.637569	-0.387354	0.698494	0.807811	NOT_CHANGE	fructose-1,6-bisphosphate aldolase	Cytoplasmic [Class 3]
410	PA14_71560	PA5421	fdhA	666.883	-0.0687426	0.0760129	-0.904354	0.365808	0.524294	NOT_CHANGE	glutathione-independent formaldehyde dehydrogenase	Cytoplasmic [Class 3]
411	PA14_63550	PA4809	fdhE	290.213	-0.101874	0.0959833	-1.06138	0.288519	0.445502	NOT_CHANGE	formate dehydrogenase accessory protein FdhE	Cytoplasmic [Class 3]
412	PA14_63605	PA4812	fdnG	1309.64	0.283454	0.0845407	3.35287	0.000799787	0.00351684	NOT_CHANGE	formate dehydrogenase-O, major subunit	Extracellular [Class 3]
413	PA14_63580	PA4811	fdnH	370.446	-0.478939	0.110689	-4.32689	1.51227e-05	9.33279e-05	NOT_CHANGE	nitrate-inducible formate dehydrogenase subunit beta	Cytoplasmic Membrane [Class 3]
414	PA14_63570	PA4810	fdnI	1086.35	-0.0101618	0.061003	-0.166579	0.867701	0.926481	NOT_CHANGE	nitrate-inducible formate dehydrogenase subunit gamma	Cytoplasmic Membrane [Class 3]
415	PA14_04750	PA0362	fdx1	194.972	-0.173251	0.14117	-1.22725	0.219729	0.365145	NOT_CHANGE	ferredoxin (4Fe-4S)	Unknown [Class 3]
416	PA14_14800	PA3809	fdx2	441.392	-2.20696	0.100482	-21.9636	6.41768e-107	1.25919e-104	DOWN	ferredoxin 2Fe-2S	Cytoplasmic [Class 3]
417	PA14_17490	PA3621	fdxA	133.024	0.435452	0.185643	2.34565	0.0189941	0.053161	NOT_CHANGE	ferredoxin I	Cytoplasmic [Class 3]
418	PA14_13430	PA3901	fecA	660.958	-0.379692	0.120743	-3.14462	0.00166302	0.00673493	NOT_CHANGE	Fe(III) dicitrate transport protein FecA	Outer Membrane [Class 3]
419	PA14_56680	PA4358	feoB	87.5872	0.0264068	0.150842	0.175063	0.86103	0.921607	NOT_CHANGE	ferrous iron transport protein B	Cytoplasmic Membrane [Class 3]
420	PA14_10170	PA4159	fepB	21.2562	-0.421109	0.290704	-1.44858	0.147454	0.271834	NOT_CHANGE	iron-enterobactin transporter periplasmic binding protein	Periplasmic [Class 3]
421	PA14_10180	PA4158	fepC	307.803	-0.234296	0.0979703	-2.3915	0.0167799	0.0480752	NOT_CHANGE	ferric enterobactin transport protein FepC	Cytoplasmic Membrane [Class 3]
422	PA14_10160	PA4160	fepD	98.9339	0.0406312	0.160634	0.252942	0.800313	0.882515	NOT_CHANGE	ferric enterobactin transport protein FepD	Cytoplasmic Membrane [Class 3]
423	PA14_10140	PA4161	fepG	268.179	-0.600072	0.1268	-4.73242	2.21862e-06	1.55276e-05	NOT_CHANGE	ferric enterobactin transport protein FepG	Cytoplasmic Membrane [Class 3]
424	PA14_15960	PA3746	ffh	226.485	1.94297	0.131457	14.7803	1.96211e-49	1.15097e-47	NOT_CHANGE	signal recognition particle protein Ffh	Cytoplasmic Membrane [Class 3]
425	PA14_00980	PA0081	fha1	1224.75	-0.0724492	0.0762358	-0.95033	0.341944	0.500943	NOT_CHANGE	Fha1	Unknown [Class 3]
426	PA14_42950	PA1665	fha2	3293.52	-0.0600353	0.0535788	-1.1205	0.262499	0.415009	NOT_CHANGE	Fha2	Cytoplasmic [Class 3]
427	PA14_29640	PA2664	fhp	586.623	0.215485	0.105848	2.0358	0.0417708	0.101068	NOT_CHANGE	nitric oxide dioxygenase	Cytoplasmic [Class 3]
428	PA14_60280	PA4550	fimU	302.382	-0.357512	0.105843	-3.37775	0.000730802	0.00323852	NOT_CHANGE	type 4 fimbrial biogenesis protein FimU	Unknown [Class 3]
429	PA14_23830	PA3115	fimV	2026.4	0.23756	0.126846	1.87281	0.0610941	0.136914	NOT_CHANGE	pilus assembly protein	Unknown [Class 3]
430	PA14_64190	PA4853	fis	484.085	2.71387	0.150617	18.0183	1.39856e-72	1.42104e-70	UP	DNA-binding protein Fis	Cytoplasmic [Class 3]
431	PA14_60500	PA4572	fklB	1275.94	-0.149615	0.0798228	-1.87434	0.0608838	0.13655	NOT_CHANGE	peptidyl-prolyl cis-trans isomerase FklB	Cytoplasmic [Class 3]
432	PA14_45640	PA1454	fleN	474.782	1.85596	0.459664	4.03766	5.39877e-05	0.000302055	NOT_CHANGE	flagellar synthesis regulator FleN	Cytoplasmic Membrane [Class 3]
433	PA14_50220	PA1097	fleQ	1825.8	1.45888	0.542055	2.69138	0.00711563	0.0236219	NOT_CHANGE	transcriptional regulator FleQ	Cytoplasmic [Class 3]
434	PA14_50180	PA1099	fleR	1986.96	1.21797	0.495005	2.46052	0.0138734	0.0411789	NOT_CHANGE	two-component response regulator	Cytoplasmic [Class 3]
435	PA14_50200	PA1098	fleS	2501.38	0.876282	0.442422	1.98065	0.0476308	0.112177	NOT_CHANGE	two-component sensor	Cytoplasmic Membrane [Class 3]
436	PA14_20740	NA	flgA	56.6061	-0.171786	0.232711	-0.738192	0.460397	0.613935	NOT_CHANGE	flagellar basal body P-ring biosynthesis protein FlgA	Cytoplasmic [Class 3]
437	PA14_50480	PA1077	flgB	1395.14	0.792139	0.303511	2.60992	0.00905626	0.0289821	NOT_CHANGE	flagellar basal body rod protein FlgB	Periplasmic [Class 3]
438	PA14_50470	PA1078	flgC	178.452	0.131467	0.116947	1.12415	0.260947	0.41305	NOT_CHANGE	flagellar basal body rod protein FlgC	Periplasmic [Class 3]
439	PA14_50460	PA1079	flgD	952.184	0.533974	0.172929	3.08783	0.00201625	0.00796144	NOT_CHANGE	flagellar basal body rod modification protein	Extracellular [Class 3]
440	PA14_50450	PA1080	flgE	376.31	0.317782	0.201688	1.57561	0.115116	0.22302	NOT_CHANGE	flagellar hook protein FlgE	Extracellular [Class 3]
441	PA14_50440	PA1081	flgF	2888.1	1.22828	0.440607	2.78771	0.00530819	0.0183163	NOT_CHANGE	flagellar basal body rod protein FlgF	Periplasmic [Class 3]
442	PA14_50420	PA1083	flgH	9562.52	1.5319	0.50792	3.01603	0.00256105	0.00979985	NOT_CHANGE	flagellar basal body L-ring protein	Outer Membrane [Class 3]
443	PA14_50410	PA1084	flgI	3512.09	1.31936	0.449453	2.93548	0.00333035	0.0122811	NOT_CHANGE	flagellar basal body P-ring protein	Periplasmic [Class 3]
444	PA14_50380	PA1085	flgJ	687.178	1.34938	0.41613	3.24269	0.00118406	0.00499798	NOT_CHANGE	flagellar rod assembly protein/muramidase FlgJ	Periplasmic [Class 3]
445	PA14_50360	PA1086	flgK	6835.75	0.928052	0.327867	2.83057	0.00464651	0.0163101	NOT_CHANGE	flagellar hook-associated protein FlgK	Extracellular [Class 3]
446	PA14_50340	PA1087	flgL	1289.18	2.52343	0.326139	7.73727	1.01577e-14	1.48476e-13	UP	flagellar hook-associated protein FlgL	Extracellular [Class 3]
447	PA14_20730	PA3351	flgM	1683.37	1.734	0.436389	3.97352	7.08187e-05	0.000388473	NOT_CHANGE	hypothetical protein	Unknown [Class 3]
448	PA14_20720	NA	flgN	716.213	2.47735	0.514896	4.81136	1.49907e-06	1.07023e-05	UP	hypothetical protein	Cytoplasmic [Class 3]
449	PA14_20700	PA3353	flgZ	123.827	-0.00441121	0.161411	-0.027329	0.978197	0.987981	NOT_CHANGE	FlgZ	Cytoplasmic [Class 3]
450	PA14_45680	PA1452	flhA	1884.07	0.780198	0.110969	7.03078	2.05377e-12	2.52396e-11	NOT_CHANGE	flagellar biosynthesis protein FlhA	Cytoplasmic Membrane [Class 3]
451	PA14_45720	PA1449	flhB	12667.6	0.456668	0.302805	1.50813	0.131522	0.24846	NOT_CHANGE	flagellar biosynthesis protein FlhB	Cytoplasmic Membrane [Class 3]
452	PA14_45660	PA1453	flhF	548.66	0.830233	0.367063	2.26183	0.023708	0.0642067	NOT_CHANGE	flagellar biosynthesis regulator FlhF	Cytoplasmic [Class 3]
453	PA14_45630	PA1455	fliA	1589.82	0.405295	0.309171	1.31091	0.189889	0.328011	NOT_CHANGE	flagellar biosynthesis sigma factor	Cytoplasmic [Class 3]
454	PA14_50290	PA1092	fliC	2703.58	1.55553	0.52884	2.94141	0.00326723	0.0121032	NOT_CHANGE	flagellin type B	Extracellular [Class 3]
455	PA14_50270	PA1094	fliD	495.081	0.374039	0.125567	2.97881	0.00289369	0.0108824	NOT_CHANGE	flagellar capping protein FliD	Extracellular [Class 3]
456	PA14_50160	PA1100	fliE	2917.5	1.34938	0.484627	2.78437	0.00536315	0.01845	NOT_CHANGE	flagellar hook-basal body protein FliE	Periplasmic [Class 3]
457	PA14_50140	PA1101	fliF	1656.12	1.149	0.485922	2.36457	0.0180511	0.0509983	NOT_CHANGE	flagellar MS-ring protein	Cytoplasmic Membrane [Class 3]
458	PA14_50130	PA1102	fliG	18595.5	1.48545	0.484891	3.06348	0.00218779	0.00853224	NOT_CHANGE	flagellar motor switch protein G	Cytoplasmic [Class 3]
459	PA14_50110	NA	fliH	653.662	0.214064	0.107602	1.9894	0.0466566	0.110238	NOT_CHANGE	flagellar assembly protein H	Cytoplasmic [Class 3]
460	PA14_50100	PA1104	fliI	997.047	-0.0674494	0.0630882	-1.06913	0.285012	0.441283	NOT_CHANGE	flagellum-specific ATP synthase	Cytoplasmic [Class 3]
461	PA14_50080	PA1105	fliJ	961.709	0.949554	0.300301	3.16201	0.00156685	0.00640012	NOT_CHANGE	flagellar biosynthesis chaperone	Cytoplasmic [Class 3]
462	PA14_45810	NA	fliL	3343.51	0.855356	0.31841	2.68633	0.00722408	0.0238844	NOT_CHANGE	flagellar basal body-associated protein FliL	Cytoplasmic Membrane [Class 3]
463	PA14_45800	PA1443	fliM	3167.93	1.09719	0.469422	2.33733	0.0194222	0.0540667	NOT_CHANGE	flagellar motor switch protein FliM	Cytoplasmic [Class 3]
464	PA14_45790	PA1444	fliN	2312.13	1.24167	0.501817	2.47434	0.0133483	0.0398696	NOT_CHANGE	flagellar motor switch protein	Cytoplasmic Membrane [Class 3]
465	PA14_45780	PA1445	fliO	1119.12	0.669159	0.125636	5.32616	1.00309e-07	8.30799e-07	NOT_CHANGE	flagellar protein FliO	Cytoplasmic Membrane [Class 3]
466	PA14_45770	PA1446	fliP	643.399	-0.84629	0.0840017	-10.0747	7.14986e-24	1.65377e-22	NOT_CHANGE	flagellar biosynthesis protein FliP	Cytoplasmic Membrane [Class 3]
467	PA14_45760	PA1447	fliQ	1557.25	0.982148	0.385942	2.54481	0.0109339	0.033978	NOT_CHANGE	flagellar biosynthesis protein FliQ	Cytoplasmic Membrane [Class 3]
468	PA14_45740	PA1448	fliR	1783.55	0.439645	0.169298	2.59687	0.00940772	0.0298883	NOT_CHANGE	flagellar biosynthesis protein FliR	Cytoplasmic Membrane [Class 3]
469	PA14_50250	NA	fliS	1371.65	1.02212	0.383148	2.66767	0.00763783	0.0250341	NOT_CHANGE	flagellar protein FliS	Cytoplasmic [Class 3]
470	PA14_00190	PA0018	fmt	471.441	-0.0516981	0.115217	-0.448702	0.653647	0.775167	NOT_CHANGE	methionyl-tRNA formyltransferase	Periplasmic [Class 3]
471	PA14_07590	PA0582	folB	512.199	-0.0346188	0.103925	-0.333113	0.739049	0.836521	NOT_CHANGE	dihydroneopterin aldolase	Cytoplasmic [Class 3]
472	PA14_23880	PA3111	folC	65.9405	-0.0697286	0.207074	-0.336732	0.736319	0.83434	NOT_CHANGE	folylpolyglutamate synthetase	Cytoplasmic [Class 3]
473	PA14_41350	PA1796	folD	1071.5	0.0415479	0.0860046	0.48309	0.629032	0.755144	NOT_CHANGE	bifunctional 5,10-methylene-tetrahydrofolate dehydrogenase/ 5,10-methylene-tetrahydrofolate cyclohydrolase	Cytoplasmic [Class 3]
474	PA14_42850	NA	folE	1201.02	0.243573	0.0748748	3.25306	0.00114167	0.00483703	NOT_CHANGE	GTP cyclohydrolase I	Cytoplasmic [Class 3]
475	PA14_19630	PA3438	folE1	669.021	0.219576	0.076644	2.86489	0.00417156	0.0148816	NOT_CHANGE	GTP cyclohydrolase I	Cytoplasmic [Class 3]
476	PA14_62570	PA4728	folK	1252.48	-0.168605	0.0926502	-1.8198	0.0687889	0.149222	NOT_CHANGE	2-amino-4-hydroxy-6- hydroxymethyldihydropteridine pyrophosphokinase	Cytoplasmic [Class 3]
477	PA14_62850	PA4750	folP	247.736	0.463086	0.180251	2.56911	0.0101959	0.0319639	NOT_CHANGE	dihydropteroate synthase	Cytoplasmic [Class 3]
478	PA14_19620	PA3439	folX	456.526	0.062623	0.0923239	0.678298	0.497583	0.646109	NOT_CHANGE	D-erythro-7,8-dihydroneopterin triphosphate 2'-epimerase	Cytoplasmic [Class 3]
479	PA14_20140	NA	fpr	27.0397	-0.227063	0.28177	-0.805848	0.420331	0.576897	NOT_CHANGE	ferredoxin--NADP+ reductase	Cytoplasmic [Class 3]
480	PA14_09340	PA4221	fptA	171.061	0.231726	0.171545	1.35081	0.176756	0.311278	NOT_CHANGE	Fe(III)-pyochelin outer membrane receptor	Outer Membrane [Class 3]
481	PA14_33680	PA2398	fpvA	462.451	-0.403681	0.086979	-4.64113	3.46508e-06	2.36407e-05	NOT_CHANGE	ferripyoverdine receptor	Outer Membrane [Class 3]
482	PA14_09970	PA4168	fpvB	962.634	0.0912972	0.0808618	1.12905	0.258876	0.410307	NOT_CHANGE	type I ferripyoverdine receptor, FpvB	Outer Membrane [Class 3]
483	PA14_17100	PA3653	frr	133.251	-0.667955	0.143199	-4.66452	3.09344e-06	2.13095e-05	NOT_CHANGE	ribosome recycling factor	Cytoplasmic [Class 3]
484	PA14_18275	PA3560	fruA	2991.49	0.105157	0.0575646	1.82676	0.0677354	0.147442	NOT_CHANGE	phosphotransferase system, fructose-specific IIBC component	Cytoplasmic Membrane [Class 3]
485	PA14_18260	PA3561	fruK	18.5543	-0.362848	0.332664	-1.09073	0.27539	0.430131	NOT_CHANGE	1-phosphofructokinase	Cytoplasmic [Class 3]
486	PA14_18230	PA3563	fruR	144.447	0.931872	0.128713	7.23994	4.48867e-13	5.67568e-12	NOT_CHANGE	DNA-binding transcriptional regulator FruR	Cytoplasmic [Class 3]
487	PA14_57290	PA4408	ftsA	17.3656	1.6493	0.432688	3.81175	0.000137986	0.000713116	NOT_CHANGE	cell division protein FtsA	Cytoplasmic [Class 3]
488	PA14_04910	PA0374	ftsE	1218.14	-0.214755	0.0629726	-3.41029	0.000648928	0.00291659	NOT_CHANGE	cell division ATP-binding protein FtsE	Cytoplasmic Membrane [Class 3]
489	PA14_62860	PA4751	ftsH	1428.01	4.10476	0.130753	31.3932	2.50172e-216	3.55869e-213	UP	cell division protein FtsH	Cytoplasmic Membrane [Class 3]
490	PA14_57425	PA4418	ftsI	116.256	1.08243	0.266732	4.05812	4.94688e-05	0.000278967	NOT_CHANGE	penicillin-binding protein 3	Cytoplasmic Membrane [Class 3]
491	PA14_30290	PA2615	ftsK	827.274	0.758034	0.164645	4.60406	4.14342e-06	2.79669e-05	NOT_CHANGE	cell division protein FtsK	Cytoplasmic Membrane [Class 3]
492	PA14_57440	PA4419	ftsL	1792.71	0.470959	0.169051	2.78589	0.00533806	0.0183859	NOT_CHANGE	cell division protein FtsL	Cytoplasmic Membrane [Class 3]
493	PA14_57300	PA4409	ftsQ	33.9162	1.19482	0.278942	4.2834	1.84062e-05	0.000111298	NOT_CHANGE	cell division protein FtsQ	Cytoplasmic Membrane [Class 3]
494	PA14_57360	PA4413	ftsW	469.857	-0.110416	0.0876219	-1.26014	0.207619	0.350426	NOT_CHANGE	cell division protein FtsW	Cytoplasmic Membrane [Class 3]
495	PA14_04920	PA0375	ftsX	4.52726	0.749456	0.737384	1.01637	0.309453	0.468861	NOT_CHANGE	cell division protein FtsX	Cytoplasmic Membrane [Class 3]
496	PA14_04900	PA0373	ftsY	156.649	2.92261	0.26654	10.965	5.63012e-28	1.5627e-26	UP	signal recognition particle receptor FtsY	Cytoplasmic [Class 3]
497	PA14_57275	PA4407	ftsZ	70.0167	1.18285	0.198297	5.96507	2.44536e-09	2.35832e-08	NOT_CHANGE	cell division protein FtsZ	Cytoplasmic [Class 3]
498	PA14_58030	NA	fumC	288.973	0.284963	0.105021	2.71339	0.00665985	0.0223435	NOT_CHANGE	fumarate hydratase	Cytoplasmic [Class 3]
499	PA14_53220	PA0854	fumC2	283.001	0.0198931	0.139002	0.143114	0.8862	0.938154	NOT_CHANGE	fumarate hydratase	Cytoplasmic [Class 3]
500	PA14_63020	PA4764	fur	104.708	1.81441	0.23373	7.76285	8.30392e-15	1.22407e-13	NOT_CHANGE	ferric uptake regulation protein	Cytoplasmic [Class 3]
501	PA14_08820	PA4266	fusA1	205.53	0.152521	0.106448	1.43282	0.15191	0.277665	NOT_CHANGE	elongation factor G	Cytoplasmic [Class 3]
502	PA14_37710	PA2071	fusA2	1892.66	-0.0834328	0.0547827	-1.52298	0.127764	0.243136	NOT_CHANGE	elongation factor G	Cytoplasmic [Class 3]
503	PA14_57030	NA	fxsA	715.156	0.0697759	0.0729752	0.95616	0.338991	0.497642	NOT_CHANGE	FxsA protein	Cytoplasmic Membrane [Class 3]
504	PA14_03430	NA	gabD	20.3949	-0.0771243	0.305703	-0.252285	0.800821	0.882729	NOT_CHANGE	succinate-semialdehyde dehydrogenase I	Cytoplasmic [Class 3]
505	PA14_01580	NA	gabP	160.991	0.094611	0.120759	0.78347	0.433351	0.589474	NOT_CHANGE	gamma-aminobutyrate permease	Cytoplasmic Membrane [Class 3]
506	PA14_03450	NA	gabT	2867.41	-0.10708	0.0488058	-2.19399	0.0282359	0.0736646	NOT_CHANGE	4-aminobutyrate aminotransferase	Cytoplasmic [Class 3]
507	PA14_30650	PA2586	gacA	2136.86	-0.507275	0.0965849	-5.25212	1.50359e-07	1.21353e-06	NOT_CHANGE	response regulator GacA	Cytoplasmic [Class 3]
508	PA14_38350	PA2023	galU	477.186	-0.24034	0.115421	-2.08229	0.037316	0.0926389	NOT_CHANGE	UTP-glucose-1-phosphate uridylyltransferase	Cytoplasmic [Class 3]
509	PA14_22890	PA3195	gapA	502.39	-0.0150967	0.107328	-0.14066	0.888139	0.940013	NOT_CHANGE	glyceraldehyde-3-phosphate dehydrogenase	Cytoplasmic [Class 3]
510	PA14_58180	PA4483	gatA	425.239	0.915287	0.125012	7.32162	2.44996e-13	3.18271e-12	NOT_CHANGE	aspartyl/glutamyl-tRNA amidotransferase subunit A	Cytoplasmic [Class 3]
511	PA14_58170	PA4482	gatC	174.968	0.19184	0.124856	1.53649	0.124419	0.238284	NOT_CHANGE	aspartyl/glutamyl-tRNA amidotransferase subunit C	Cytoplasmic [Class 3]
512	PA14_24290	PA3082	gbt	829.939	-0.162768	0.0802087	-2.02931	0.0424266	0.102378	NOT_CHANGE	glycine betaine transmethylase	Outer Membrane [Class 3]
513	PA14_46070	PA1421	gbuA	20.058	3.02233	0.46471	6.50369	7.83742e-11	8.68988e-10	UP	guanidinobutyrase	Cytoplasmic [Class 3]
514	PA14_46060	PA1422	gbuR	834.695	-0.185569	0.107798	-1.72144	0.0851701	0.175142	NOT_CHANGE	transcriptional regulator	Cytoplasmic Membrane [Class 3]
515	PA14_34970	PA2290	gcd	245.487	-0.254104	0.129269	-1.96569	0.0493341	0.115282	NOT_CHANGE	glucose dehydrogenase	Cytoplasmic Membrane [Class 3]
516	PA14_05840	PA0447	gcdH	1957.02	0.322249	0.12311	2.61757	0.00885596	0.028421	NOT_CHANGE	glutaryl-CoA dehydrogenase	Cytoplasmic [Class 3]
517	PA14_45000	PA1502	gcl	253.121	0.114073	0.138842	0.821603	0.411303	0.568175	NOT_CHANGE	glyoxylate carboligase	Cytoplasmic [Class 3]
518	PA14_07570	PA0580	gcp	117.01	0.0254651	0.154938	0.164356	0.869451	0.927479	NOT_CHANGE	DNA-binding/iron metalloprotein/AP endonuclease	Extracellular [Class 3]
519	PA14_68860	PA5214	gcvH1	398.302	0.390107	0.0887585	4.39515	1.10694e-05	6.97507e-05	NOT_CHANGE	glycine cleavage system protein H	Unknown [Class 3]
520	PA14_32985	PA2446	gcvH2	1494.02	0.0819683	0.0573754	1.42863	0.153111	0.278963	NOT_CHANGE	glycine cleavage system protein H	Unknown [Class 3]
521	PA14_68850	PA5213	gcvP1	257.635	0.0441581	0.107957	0.409034	0.682515	0.796141	NOT_CHANGE	glycine dehydrogenase	Cytoplasmic [Class 3]
522	PA14_33000	PA2445	gcvP2	103.77	-0.0241371	0.148202	-0.162866	0.870624	0.928383	NOT_CHANGE	glycine dehydrogenase	Cytoplasmic [Class 3]
523	PA14_68870	NA	gcvT	572.114	0.185825	0.121116	1.53428	0.124961	0.238761	NOT_CHANGE	glycine cleavage system aminomethyltransferase T	Cytoplasmic [Class 3]
524	PA14_33040	PA2442	gcvT2	1293.22	-0.137455	0.0622919	-2.20663	0.0273401	0.0719543	NOT_CHANGE	glycine cleavage system protein T2	Cytoplasmic [Class 3]
525	PA14_24445	PA3068	gdhB	650.343	0.345685	0.0794525	4.35084	1.35618e-05	8.38765e-05	NOT_CHANGE	NAD-dependent glutamate dehydrogenase	Cytoplasmic [Class 3]
526	PA14_17380	PA3630	gfnR	557.474	0.06587	0.0924576	0.712435	0.476195	0.627356	NOT_CHANGE	glutathione-dependent formaldehyde neutralization regulator GfnR	Cytoplasmic [Class 3]
527	PA14_46960	PA1338	ggt	324.411	-0.429744	0.0939965	-4.57192	4.83284e-06	3.23516e-05	NOT_CHANGE	gamma-glutamyltranspeptidase	Periplasmic [Class 3]
528	PA14_73370	PA5565	gidA	570.165	1.79988	0.146066	12.3224	6.86546e-35	2.55323e-33	NOT_CHANGE	tRNA uridine 5-carboxymethylaminomethyl modification protein GidA	Cytoplasmic [Class 3]
529	PA14_73360	PA5564	gidB	1287.15	-0.369856	0.13779	-2.68419	0.00727049	0.0240192	NOT_CHANGE	16S rRNA methyltransferase GidB	Unknown [Class 3]
530	PA14_06290	PA0482	glcB	614.063	-0.391811	0.0850342	-4.60769	4.07176e-06	2.75485e-05	NOT_CHANGE	malate synthase G	Cytoplasmic [Class 3]
531	PA14_70710	PA5356	glcC	536.339	0.368812	0.0759518	4.85587	1.19859e-06	8.66581e-06	NOT_CHANGE	DNA-binding transcriptional regulator GlcC	Cytoplasmic [Class 3]
532	PA14_70690	PA5355	glcD	1735.86	-0.0811657	0.0867918	-0.935176	0.349697	0.507596	NOT_CHANGE	glycolate oxidase subunit GlcD	Cytoplasmic [Class 3]
533	PA14_70680	PA5354	glcE	297.955	-0.183266	0.101331	-1.80859	0.0705146	0.151865	NOT_CHANGE	glycolate oxidase FAD binding subunit	Unknown [Class 3]
534	PA14_36570	NA	glgA	397.352	-0.106374	0.185462	-0.573561	0.566265	0.705805	NOT_CHANGE	glycogen synthase	Cytoplasmic [Class 3]
535	PA14_36710	PA2153	glgB	613.572	-0.0734522	0.0885145	-0.829833	0.406633	0.563912	NOT_CHANGE	glycogen branching protein	Cytoplasmic [Class 3]
536	PA14_36840	PA2144	glgP	198.331	-0.0774629	0.12396	-0.624905	0.532033	0.67706	NOT_CHANGE	glycogen phosphorylase	Cytoplasmic [Class 3]
537	PA14_22930	PA3193	glk	457.248	-0.357763	0.0923084	-3.87573	0.000106304	0.000564244	NOT_CHANGE	glucokinase	Cytoplasmic [Class 3]
538	PA14_62840	PA4749	glmM	1312.38	1.23564	0.120936	10.2173	1.65904e-24	3.9831e-23	NOT_CHANGE	phosphoglucosamine mutase	Cytoplasmic [Class 3]
539	PA14_73190	PA5550	glmR	928.313	2.57411	0.0987432	26.0687	8.2559e-150	3.13174e-147	UP	GlmR transcriptional regulator	Cytoplasmic [Class 3]
540	PA14_73170	PA5549	glmS	796.99	0.203105	0.0867092	2.34237	0.0191616	0.0534459	NOT_CHANGE	glucosamine--fructose-6-phosphate aminotransferase	Cytoplasmic [Class 3]
541	PA14_73220	PA5552	glmU	164.117	1.50205	0.191345	7.84995	4.16208e-15	6.25624e-14	NOT_CHANGE	glucosamine-1-phosphate acetyltransferase/N-acetylglucosamine-1-phosphate uridyltransferase	Cytoplasmic [Class 3]
542	PA14_67600	PA5119	glnA	271.994	0.108157	0.115027	0.940275	0.347076	0.505468	NOT_CHANGE	glutamine synthetase	Cytoplasmic [Class 3]
543	PA14_17040	PA3658	glnD	371.763	-0.0607721	0.102983	-0.59012	0.55511	0.695721	NOT_CHANGE	PII uridylyl-transferase	Cytoplasmic [Class 3]
544	PA14_66270	PA5014	glnE	419.8	-0.0368833	0.0813306	-0.453498	0.65019	0.772356	NOT_CHANGE	bifunctional glutamine-synthetase adenylyltransferase/deadenyltransferase	Cytoplasmic [Class 3]
545	PA14_69810	PA5288	glnK	100.486	0.0324479	0.182843	0.177463	0.859145	0.920455	NOT_CHANGE	nitrogen regulatory protein P-II 2	Cytoplasmic Membrane [Class 3]
546	PA14_41380	PA1794	glnS	101.472	0.0741791	0.145784	0.50883	0.610872	0.742844	NOT_CHANGE	glutaminyl-tRNA synthetase	Cytoplasmic [Class 3]
547	PA14_18750	PA3524	gloA1	658.961	0.261564	0.0931528	2.8079	0.00498658	0.0173645	NOT_CHANGE	lactoylglutathione lyase	Cytoplasmic [Class 3]
548	PA14_55130	PA0710	gloA2	671.987	-0.24664	0.0848364	-2.90724	0.00364632	0.0132488	NOT_CHANGE	lactoylglutathione lyase	Cytoplasmic [Class 3]
549	PA14_67500	PA5111	gloA3	1028.83	-0.108313	0.0611237	-1.77204	0.0763887	0.16158	NOT_CHANGE	lactoylglutathione lyase	Cytoplasmic [Class 3]
550	PA14_17930	PA3584	glpD	262.369	-0.424884	0.102871	-4.13027	3.62344e-05	0.000208257	NOT_CHANGE	glycerol-3-phosphate dehydrogenase	Cytoplasmic [Class 3]
551	PA14_07690	NA	glpE	579.632	-0.13615	0.0769899	-1.76841	0.0769921	0.162555	NOT_CHANGE	thiosulfate sulfurtransferase	Cytoplasmic [Class 3]
552	PA14_17960	PA3582	glpK	3160.63	0.220452	0.281893	0.782042	0.43419	0.590243	NOT_CHANGE	glycerol kinase	Cytoplasmic [Class 3]
553	PA14_17920	PA3585	glpM	160.655	-0.239925	0.133012	-1.80378	0.0712653	0.153134	NOT_CHANGE	membrane protein GlpM	Cytoplasmic Membrane [Class 3]
554	PA14_04550	PA0347	glpQ	312.917	-0.230403	0.116679	-1.97468	0.0483045	0.113435	NOT_CHANGE	glycerophosphoryl diester phosphodiesterase, periplasmic	Periplasmic [Class 3]
555	PA14_17940	PA3583	glpR	3278.77	2.24901	0.118876	18.9189	7.96643e-80	9.25081e-78	UP	glycerol-3-phosphate regulon repressor	Cytoplasmic [Class 3]
556	PA14_69130	PA5235	glpT	808.885	0.0717148	0.114293	0.627462	0.530357	0.675561	NOT_CHANGE	sn-glycerol-3-phosphate transporter	Cytoplasmic Membrane [Class 3]
557	PA14_44070	PA1580	gltA	572.494	0.710449	0.0781813	9.08719	1.01629e-19	1.90848e-18	NOT_CHANGE	type II citrate synthase	Cytoplasmic [Class 3]
558	PA14_66570	PA5036	gltB	294.689	0.355295	0.108887	3.26296	0.00110254	0.00468518	NOT_CHANGE	glutamate synthase subunit alpha	Cytoplasmic [Class 3]
559	PA14_66560	PA5035	gltD	857.395	0.483088	0.111008	4.35185	1.34996e-05	8.35827e-05	NOT_CHANGE	glutamate synthase subunit beta	Cytoplasmic [Class 3]
560	PA14_23010	NA	gltK	255.416	-0.0734747	0.117685	-0.624332	0.53241	0.67706	NOT_CHANGE	ABC transporter ATP-binding protein	Cytoplasmic Membrane [Class 3]
561	PA14_72340	PA5479	gltP	1004.64	-0.283026	0.0780322	-3.62704	0.000286685	0.0014111	NOT_CHANGE	glutamate/aspartate:proton symporter	Cytoplasmic Membrane [Class 3]
562	PA14_22940	PA3192	gltR	1421.47	-0.0698316	0.0692102	-1.00898	0.312985	0.472885	NOT_CHANGE	two-component response regulator GltR	Cytoplasmic [Class 3]
563	PA14_23160	PA3176	gltS	424.162	0.0674412	0.122223	0.551789	0.581093	0.717539	NOT_CHANGE	sodium/glutamate symporter	Cytoplasmic Membrane [Class 3]
564	PA14_23560	PA3134	gltX	367.665	0.519231	0.111245	4.66747	3.04926e-06	2.10306e-05	NOT_CHANGE	glutamyl-tRNA synthetase	Cytoplasmic [Class 3]
565	PA14_60890	NA	glyA	2.39565	1.93027	1.04235	1.85184	0.0640486	0.141254	NOT_CHANGE	serine hydroxymethyltransferase	Cytoplasmic [Class 3]
566	PA14_71460	PA5415	glyA1	4162.55	-0.523042	0.0680599	-7.68502	1.52969e-14	2.18692e-13	NOT_CHANGE	serine hydroxymethyltransferase	Cytoplasmic [Class 3]
567	PA14_33010	PA2444	glyA2	209.528	-0.0457059	0.11881	-0.384696	0.700463	0.809101	NOT_CHANGE	serine hydroxymethyltransferase	Cytoplasmic [Class 3]
568	PA14_00100	PA0009	glyQ	246.34	1.06451	0.149308	7.12967	1.00611e-12	1.24723e-11	NOT_CHANGE	glycyl-tRNA synthetase subunit alpha	Cytoplasmic [Class 3]
569	PA14_00090	PA0008	glyS	114.303	1.26254	0.18118	6.9684	3.20562e-12	3.89743e-11	NOT_CHANGE	glycyl-tRNA synthetase subunit beta	Cytoplasmic [Class 3]
570	PA14_71990	PA5453	gmd	1109.29	-0.170193	0.068913	-2.46968	0.0135235	0.0403295	NOT_CHANGE	GDP-mannose 4,6-dehydratase	Cytoplasmic [Class 3]
571	PA14_57500	NA	gmhA	108.345	0.374712	0.167475	2.23742	0.0252592	0.0675717	NOT_CHANGE	phosphoheptose isomerase	Cytoplasmic [Class 3]
572	PA14_70440	PA5336	gmk	12.0224	0.545325	0.388664	1.40307	0.160595	0.289448	NOT_CHANGE	guanylate kinase	Cytoplasmic [Class 3]
573	PA14_35290	NA	gnd	4021.84	-0.272214	0.0830604	-3.27731	0.00104802	0.00448365	NOT_CHANGE	gluconate dehydrogenase	Unknown [Class 3]
574	PA14_34660	PA2320	gntR	3879.27	0.310559	0.099564	3.11919	0.00181346	0.00724622	NOT_CHANGE	transcriptional regulator GntR	Cytoplasmic [Class 3]
575	PA14_34630	NA	gnuT	1876.29	0.516719	0.124738	4.14244	3.43629e-05	0.000198301	NOT_CHANGE	gluconate permease	Cytoplasmic Membrane [Class 3]
576	PA14_38480	NA	gnyA	995.598	-0.088081	0.0760064	-1.15886	0.246512	0.395783	NOT_CHANGE	alpha subunit of geranoyl-CoA carboxylase, GnyA	Cytoplasmic [Class 3]
577	PA14_38460	NA	gnyB	211.621	0.0881786	0.118821	0.742113	0.458019	0.61263	NOT_CHANGE	acyl-CoA carboxyltransferase subunit beta	Cytoplasmic [Class 3]
578	PA14_38440	NA	gnyD	308.872	0.171667	0.118244	1.45181	0.146554	0.270831	NOT_CHANGE	citronelloyl-CoA dehydrogenase, GnyD	Cytoplasmic [Class 3]
579	PA14_38470	NA	gnyH	496.961	0.30919	0.0769263	4.0193	5.83707e-05	0.000324345	NOT_CHANGE	gamma-carboxygeranoyl-CoA hydratase	Cytoplasmic [Class 3]
580	PA14_38490	NA	gnyL	1400.33	0.0716619	0.0811508	0.883071	0.377198	0.536148	NOT_CHANGE	hydroxymethylglutaryl-CoA lyase	Cytoplasmic [Class 3]
581	PA14_38430	NA	gnyR	1026.78	0.05296	0.10492	0.504765	0.613724	0.744582	NOT_CHANGE	regulatory gene of gnyRDBHAL cluster, GnyR	Cytoplasmic [Class 3]
582	PA14_38330	PA2025	gor	40.844	0.482706	0.255105	1.89219	0.0584659	0.132378	NOT_CHANGE	glutathione reductase	Cytoplasmic [Class 3]
583	PA14_43640	PA1614	gpsA	444.004	0.783849	0.131534	5.95929	2.53337e-09	2.43906e-08	NOT_CHANGE	NAD(P)H-dependent glycerol-3-phosphate dehydrogenase	Cytoplasmic [Class 3]
584	PA14_62900	PA4755	greA	109.159	-0.0578148	0.165702	-0.348909	0.727158	0.828168	NOT_CHANGE	transcription elongation factor GreA	Cytoplasmic [Class 3]
585	PA14_27130	PA2859	greB	874.439	-0.390956	0.0692537	-5.64528	1.64915e-08	1.47629e-07	NOT_CHANGE	transcription elongation factor GreB	Cytoplasmic [Class 3]
586	PA14_57010	PA4385	groEL	281.859	-1.22605	0.116738	-10.5026	8.40423e-26	2.15406e-24	NOT_CHANGE	chaperonin GroEL	Cytoplasmic [Class 3]
587	PA14_57020	PA4386	groES	250.822	-0.539915	0.126224	-4.27742	1.8907e-05	0.000113842	NOT_CHANGE	co-chaperonin GroES	Cytoplasmic [Class 3]
588	PA14_62990	PA4762	grpE	229.244	0.11831	0.15948	0.74185	0.458178	0.612699	NOT_CHANGE	heat shock protein GrpE	Cytoplasmic [Class 3]
589	PA14_67740	NA	grx	157.242	0.604452	0.137751	4.388	1.14399e-05	7.1926e-05	NOT_CHANGE	glutaredoxin	Unknown [Class 3]
590	PA14_68730	PA5203	gshA	113.075	-1.64431	0.151465	-10.8561	1.86619e-27	5.08067e-26	NOT_CHANGE	glutamate--cysteine ligase	Cytoplasmic [Class 3]
591	PA14_05310	PA0407	gshB	97.6742	-1.07132	0.166993	-6.41539	1.40458e-10	1.52812e-09	NOT_CHANGE	glutathione synthetase	Cytoplasmic [Class 3]
592	PA14_32690	PA2470	gtdA	173.855	0.076289	0.137141	0.55628	0.578019	0.71514	NOT_CHANGE	gentisate 1,2-dioxygenase	Cytoplasmic [Class 3]
593	PA14_15340	PA3769	guaA	79.6875	-0.0732322	0.161062	-0.454684	0.649337	0.771664	NOT_CHANGE	GMP synthase	Cytoplasmic [Class 3]
594	PA14_15310	PA3770	guaB	16.8033	-0.139115	0.364423	-0.381739	0.702655	0.809919	NOT_CHANGE	inosine 5'-monophosphate dehydrogenase	Cytoplasmic [Class 3]
595	PA14_23260	PA3168	gyrA	7.81184	1.01682	0.544542	1.8673	0.0618594	0.138031	NOT_CHANGE	DNA gyrase subunit A	Cytoplasmic [Class 3]
596	PA14_00050	PA0004	gyrB	3098	-0.170012	0.0710068	-2.3943	0.016652	0.0478052	NOT_CHANGE	DNA gyrase subunit B	Cytoplasmic [Class 3]
597	PA14_20020	PA3407	hasAp	790.184	0.0271977	0.073347	0.370809	0.71078	0.81572	NOT_CHANGE	heme acquisition protein HasAp	Extracellular [Class 3]
598	PA14_20030	PA3406	hasD	1250.21	-0.829224	0.0671694	-12.3453	5.16633e-35	1.95976e-33	NOT_CHANGE	transport protein HasD	Cytoplasmic Membrane [Class 3]
599	PA14_20040	PA3405	hasE	977.126	-1.00241	0.120944	-8.28821	1.14967e-16	1.86372e-15	NOT_CHANGE	metalloprotease secretion protein	Cytoplasmic Membrane [Class 3]
600	PA14_20010	PA3408	hasR	3987.2	-0.234233	0.0748616	-3.12887	0.00175478	0.00704637	NOT_CHANGE	heme uptake outer membrane receptor HasR	Outer Membrane [Class 3]
601	PA14_36330	PA2193	hcnA	433.779	0.0132581	0.0806399	0.164411	0.869408	0.927479	NOT_CHANGE	hydrogen cyanide synthase HcnA	Unknown [Class 3]
602	PA14_36320	PA2194	hcnB	115.103	-2.80331	0.435584	-6.43575	1.22868e-10	1.34433e-09	DOWN	hydrogen cyanide synthase HcnB	Cytoplasmic [Class 3]
603	PA14_36310	PA2195	hcnC	418.53	-0.0744417	0.0866286	-0.859319	0.390164	0.549106	NOT_CHANGE	hydrogen cyanide synthase HcnC	Cytoplasmic [Class 3]
604	PA14_01030	PA0085	hcp1	2066.15	-0.0892565	0.0748022	-1.19323	0.232778	0.380059	NOT_CHANGE	Hcp1	Extracellular [Class 3]
605	PA14_43070	NA	hcp2	249.246	-0.149685	0.10319	-1.45057	0.146899	0.271198	NOT_CHANGE	Hcp2	Extracellular [Class 3]
606	PA14_34030	PA2367	hcp3	3008.22	-0.962307	0.399348	-2.40969	0.0159659	0.046138	NOT_CHANGE	Hcp3	Extracellular [Class 3]
607	PA14_69560	PA5267	hcpB	1187.87	0.223733	0.10473	2.13628	0.0326568	0.0830066	NOT_CHANGE	secreted protein Hcp	Extracellular [Class 3]
608	PA14_03240	PA0263	hcpC	46.5105	0.181441	0.220814	0.821693	0.411252	0.568175	NOT_CHANGE	secreted protein Hcp	Extracellular [Class 3]
609	PA14_61710	PA4666	hemA	54.0119	0.661261	0.247067	2.67645	0.00744076	0.0245011	NOT_CHANGE	glutamyl-tRNA reductase	Cytoplasmic [Class 3]
610	PA14_69450	PA5260	hemC	1.91574	0.675314	0.984186	0.686165	0.492609	0.641042	NOT_CHANGE	porphobilinogen deaminase	Cytoplasmic [Class 3]
611	PA14_69440	PA5259	hemD	700.868	-0.589176	0.28854	-2.04192	0.0411596	0.100127	NOT_CHANGE	uroporphyrinogen-III synthase	Unknown [Class 3]
612	PA14_66550	PA5034	hemE	7.73284	3.10562	0.695537	4.46507	8.00423e-06	5.18725e-05	UP	uroporphyrinogen decarboxylase	Cytoplasmic [Class 3]
613	PA14_00280	PA0024	hemF	856.658	-0.0107304	0.0931436	-0.115203	0.908284	0.952275	NOT_CHANGE	coproporphyrinogen III oxidase	Cytoplasmic [Class 3]
614	PA14_61580	PA4655	hemH	16.4122	0.798742	0.354419	2.25367	0.0242171	0.0653987	NOT_CHANGE	ferrochelatase	Cytoplasmic [Class 3]
615	PA14_12390	PA3977	hemL	35.899	0.435248	0.250375	1.73839	0.0821423	0.170518	NOT_CHANGE	glutamate-1-semialdehyde aminotransferase	Cytoplasmic [Class 3]
616	PA14_44470	PA1546	hemN	549.27	-0.0901873	0.103323	-0.872864	0.382737	0.541698	NOT_CHANGE	coproporphyrinogen III oxidase	Cytoplasmic [Class 3]
617	PA14_21230	PA3308	hepA	1115.37	-0.0146183	0.0683429	-0.213896	0.830629	0.904377	NOT_CHANGE	ATP-dependent helicase HepA	Cytoplasmic [Class 3]
618	PA14_23430	NA	hepP	3749.4	0.334737	0.0835957	4.00424	6.22185e-05	0.000344381	NOT_CHANGE	HepP	Unknown [Class 3]
619	PA14_23060	NA	hexR	350.497	0.102668	0.101929	1.00724	0.313819	0.473757	NOT_CHANGE	DNA-binding transcriptional regulator HexR	Cytoplasmic [Class 3]
620	PA14_65270	PA4941	hflC	751.993	0.651595	0.160944	4.04857	5.15306e-05	0.000290306	NOT_CHANGE	protease subunit HflC	Cytoplasmic [Class 3]
621	PA14_65280	PA4942	hflK	1899.84	2.17639	0.109047	19.9582	1.27213e-88	1.90484e-86	UP	protease subunit HflK	Unknown [Class 3]
622	PA14_65300	NA	hflX	6862.3	1.41877	0.0873684	16.239	2.67387e-59	2.00189e-57	NOT_CHANGE	GTP-binding protein	Cytoplasmic [Class 3]
623	PA14_65310	PA4944	hfq	583.414	2.21625	0.170176	13.0233	9.01447e-39	3.85187e-37	UP	RNA-binding protein Hfq	Cytoplasmic [Class 3]
624	PA14_61845	PA4674.1	higB	1154.76	-0.43242	0.162012	-2.66907	0.00760623	0.0249449	NOT_CHANGE	HigB	Cytoplasmic [Class 3]
625	PA14_67890	PA5141	hisA	124.494	1.093	0.16346	6.68665	2.28342e-11	2.60897e-10	NOT_CHANGE	1-(5-phosphoribosyl)-5-[(5- phosphoribosylamino)methylideneamino] imidazole-4-carboxamide isomerase	Cytoplasmic [Class 3]
626	PA14_67930	PA5143	hisB	45.1613	0.794141	0.273502	2.9036	0.00368897	0.0133866	NOT_CHANGE	imidazoleglycerol-phosphate dehydratase	Cytoplasmic [Class 3]
627	PA14_57770	PA4447	hisC1	109.192	0.398935	0.138152	2.88765	0.00388133	0.0139866	NOT_CHANGE	histidinol-phosphate aminotransferase	Cytoplasmic [Class 3]
628	PA14_23290	PA3165	hisC2	41.6394	0.461962	0.220286	2.0971	0.0359845	0.0899993	NOT_CHANGE	histidinol-phosphate aminotransferase	Cytoplasmic [Class 3]
629	PA14_57780	PA4448	hisD	803.516	1.11107	0.0939055	11.8318	2.6741e-32	8.50034e-31	NOT_CHANGE	histidinol dehydrogenase	Cytoplasmic [Class 3]
630	PA14_66950	PA5067	hisE	292.068	1.60089	0.126332	12.6721	8.441e-37	3.45534e-35	NOT_CHANGE	phosphoribosyl-ATP pyrophosphatase	Cytoplasmic [Class 3]
631	PA14_67880	PA5140	hisF1	1254.97	0.542464	0.090097	6.02089	1.73464e-09	1.69882e-08	NOT_CHANGE	imidazole glycerol phosphate synthase subunit HisF	Cytoplasmic [Class 3]
632	PA14_57800	PA4449	hisG	453.328	2.01427	0.13156	15.3107	6.49032e-53	3.97096e-51	UP	ATP phosphoribosyltransferase	Cytoplasmic [Class 3]
633	PA14_67920	NA	hisH	215.196	0.890191	0.150525	5.91392	3.34058e-09	3.18925e-08	NOT_CHANGE	imidazole glycerol phosphate synthase subunit HisH	Cytoplasmic [Class 3]
634	PA14_66940	PA5066	hisI	87.0235	0.947528	0.209749	4.51743	6.25939e-06	4.10322e-05	NOT_CHANGE	phosphoribosyl-AMP cyclohydrolase	Cytoplasmic [Class 3]
635	PA14_26240	PA2923	hisJ	178.091	-0.238958	0.116324	-2.05424	0.0399521	0.0977014	NOT_CHANGE	periplasmic histidine-binding protein HisJ	Periplasmic [Class 3]
636	PA14_26210	PA2926	hisP	733.12	-0.160797	0.0862933	-1.86338	0.0624085	0.138821	NOT_CHANGE	histidine transport	Cytoplasmic Membrane [Class 3]
637	PA14_26230	PA2924	hisQ	656.091	-0.125364	0.0771201	-1.62557	0.104042	0.206486	NOT_CHANGE	histidine transport system permease	Cytoplasmic Membrane [Class 3]
638	PA14_14890	PA3802	hisS	1132.81	0.324726	0.0681207	4.76693	1.87058e-06	1.31891e-05	NOT_CHANGE	histidyl-tRNA synthetase	Cytoplasmic [Class 3]
639	PA14_65250	NA	hisZ	1721.01	1.66951	0.0808051	20.6609	7.78437e-95	1.26552e-92	NOT_CHANGE	ATP phosphoribosyltransferase	Cytoplasmic [Class 3]
640	PA14_62000	PA4687	hitA	11194.6	5.51219	0.170485	32.3325	2.44731e-229	4.64173e-226	UP	ferric iron-binding periplasmic protein HitA	Periplasmic [Class 3]
641	PA14_62010	PA4688	hitB	13254.2	5.02744	0.152559	32.954	3.70684e-238	1.0546e-234	UP	iron ABC transporter, permease	Cytoplasmic Membrane [Class 3]
642	PA14_38510	PA2009	hmgA	863.12	-0.00679507	0.0703048	-0.0966515	0.923003	0.960828	NOT_CHANGE	homogentisate 1,2-dioxygenase	Unknown [Class 3]
643	PA14_38500	PA2010	hmgR	692.397	0.121242	0.0740443	1.63743	0.101541	0.202955	NOT_CHANGE	HmgR	Cytoplasmic [Class 3]
644	PA14_62280	NA	hmuV	310.158	-0.259078	0.121296	-2.13591	0.0326865	0.0830295	NOT_CHANGE	hemin importer ATP-binding subunit	Cytoplasmic Membrane [Class 3]
645	PA14_12200	PA3989	holA	852.559	0.136273	0.0824216	1.65337	0.098256	0.196997	NOT_CHANGE	DNA polymerase III subunit delta	Unknown [Class 3]
646	PA14_25760	PA2961	holB	477.825	0.511992	0.101996	5.01975	5.17391e-07	3.93051e-06	NOT_CHANGE	DNA polymerase III subunit delta'	Cytoplasmic [Class 3]
647	PA14_14460	PA3832	holC	775.725	-0.0955335	0.0739357	-1.29212	0.196317	0.336865	NOT_CHANGE	DNA polymerase III subunit chi	Cytoplasmic [Class 3]
648	PA14_16070	PA3736	hom	230.369	0.882355	0.108618	8.12348	4.52998e-16	7.10072e-15	NOT_CHANGE	homoserine dehydrogenase	Cytoplasmic [Class 3]
649	PA14_11000	PA4091	hpaA	84.0141	0.0144669	0.185282	0.0780804	0.937764	0.967696	NOT_CHANGE	4-hydroxyphenylacetate 3-monooxygenase large chain	Cytoplasmic [Class 3]
650	PA14_10990	PA4092	hpaC	3317.62	0.474778	0.0936339	5.07058	3.96613e-07	3.08296e-06	NOT_CHANGE	4-hydroxyphenylacetate 3-monooxygenase small subunit	Unknown [Class 3]
651	PA14_10620	PA4124	hpcB	661.654	1.56849	0.134089	11.6974	1.31433e-31	4.08664e-30	NOT_CHANGE	homoprotocatechuate 2,3-dioxygenase	Unknown [Class 3]
652	PA14_10630	PA4123	hpcC	1009.29	-0.0360124	0.0744517	-0.483702	0.628597	0.755144	NOT_CHANGE	5-carboxy-2-hydroxymuconate semialdehyde dehydrogenase	Cytoplasmic [Class 3]
653	PA14_10610	PA4125	hpcD	817.085	-0.0375645	0.101867	-0.368762	0.712305	0.816889	NOT_CHANGE	5-carboxymethyl-2-hydroxymuconate isomerase	Unknown [Class 3]
654	PA14_10590	PA4127	hpcG	884.194	0.0485241	0.0669675	0.724591	0.468703	0.621515	NOT_CHANGE	2-oxo-hepta-3-ene-1,7-dioic acid hydratase	Cytoplasmic [Class 3]
655	PA14_53070	PA0865	hpd	513.218	0.221186	0.0774376	2.85631	0.00428598	0.0152325	NOT_CHANGE	4-hydroxyphenylpyruvate dioxygenase	Cytoplasmic [Class 3]
656	PA14_61210	PA4626	hprA	1245.68	-0.117857	0.0557426	-2.1143	0.0344896	0.0869114	NOT_CHANGE	glycerate dehydrogenase	Cytoplasmic [Class 3]
657	PA14_21400	NA	hrpA	831.936	-0.114257	0.0860485	-1.32782	0.184237	0.320289	NOT_CHANGE	ATP-dependent helicase	Cytoplasmic Membrane [Class 3]
658	PA14_14780	PA3810	hscA	254.619	-0.515147	0.14481	-3.5574	0.000374543	0.00179239	NOT_CHANGE	chaperone protein HscA	Cytoplasmic [Class 3]
659	PA14_14770	PA3811	hscB	675.615	-1.26222	0.0969231	-13.0229	9.0712e-39	3.85187e-37	NOT_CHANGE	co-chaperone HscB	Cytoplasmic [Class 3]
660	PA14_43050	PA1656	hsiA2	1539.67	-0.121355	0.0711289	-1.70612	0.087985	0.18002	NOT_CHANGE	HsiA2	Cytoplasmic [Class 3]
661	PA14_34140	PA2360	hsiA3	234.295	0.115325	0.128886	0.89478	0.370905	0.53013	NOT_CHANGE	HsiA3	Cytoplasmic [Class 3]
662	PA14_01010	NA	hsiB1	119.387	-0.120929	0.208726	-0.579368	0.562341	0.702401	NOT_CHANGE	HsiB1	Cytoplasmic [Class 3]
663	PA14_43040	PA1657	hsiB2	430.825	-0.106523	0.0916379	-1.16244	0.245058	0.394338	NOT_CHANGE	HsiB2	Cytoplasmic [Class 3]
664	PA14_34070	PA2365	hsiB3	1951.58	-0.122151	0.0917942	-1.3307	0.183286	0.318929	NOT_CHANGE	HsiB3	Cytoplasmic [Class 3]
665	PA14_01020	NA	hsiC1	636.573	-0.0489803	0.0769304	-0.636683	0.524331	0.669985	NOT_CHANGE	HsiC1	Cytoplasmic [Class 3]
666	PA14_43030	PA1658	hsiC2	1752.43	-0.28917	0.0578343	-4.99998	5.7336e-07	4.33833e-06	NOT_CHANGE	HsiC2	Cytoplasmic [Class 3]
667	PA14_34050	PA2366	hsiC3	364.528	1.06258	0.0985259	10.7848	4.06189e-27	1.0902e-25	NOT_CHANGE	HsiC3	Cytoplasmic Membrane [Class 3]
668	PA14_43020	PA1659	hsiF2	119.155	0.0467201	0.17264	0.270621	0.786682	0.872413	NOT_CHANGE	HsiF2	Unknown [Class 3]
669	PA14_34020	PA2368	hsiF3	338.785	-1.00762	0.122483	-8.22664	1.92541e-16	3.0948e-15	NOT_CHANGE	HsiF3	Cytoplasmic [Class 3]
670	PA14_43000	PA1660	hsiG2	585.863	0.0993251	0.0811265	1.22432	0.22083	0.366227	NOT_CHANGE	HsiG2	Cytoplasmic [Class 3]
671	PA14_34010	PA2369	hsiG3	2095.71	0.259316	0.104307	2.48609	0.0129155	0.0388832	NOT_CHANGE	HsiG3	Cytoplasmic [Class 3]
672	PA14_42990	PA1661	hsiH2	1602.17	0.340614	0.347455	0.980313	0.326932	0.485829	NOT_CHANGE	HsiH2	Cytoplasmic Membrane [Class 3]
673	PA14_34000	PA2370	hsiH3	204.642	-0.371022	0.121781	-3.04664	0.00231414	0.00895745	NOT_CHANGE	HsiH3	Unknown [Class 3]
674	PA14_42920	PA1667	hsiJ2	761.152	0.0876248	0.12626	0.694001	0.487681	0.636885	NOT_CHANGE	HsiJ2	Cytoplasmic [Class 3]
675	PA14_34100	PA2363	hsiJ3	1305.9	-0.118584	0.0801765	-1.47904	0.139129	0.259385	NOT_CHANGE	HsiJ3	Cytoplasmic [Class 3]
676	PA14_68610	NA	hslO	2623.96	0.0274136	0.0702371	0.390301	0.696314	0.806298	NOT_CHANGE	Hsp33-like chaperonin	Cytoplasmic [Class 3]
677	PA14_66790	PA5054	hslU	279.466	0.086442	0.132793	0.650952	0.515078	0.662176	NOT_CHANGE	ATP-dependent protease ATP-binding subunit HslU	Cytoplasmic [Class 3]
678	PA14_66770	PA5053	hslV	794.989	0.375905	0.0989463	3.79909	0.000145231	0.000747166	NOT_CHANGE	ATP-dependent protease peptidase subunit	Cytoplasmic [Class 3]
679	PA14_43850	PA1596	htpG	2441.62	-0.0361152	0.0747187	-0.48335	0.628847	0.755144	NOT_CHANGE	heat shock protein 90	Cytoplasmic [Class 3]
680	PA14_27480	PA2830	htpX	257.602	3.74746	0.189349	19.7913	3.53795e-87	4.90998e-85	UP	heat shock protein HtpX	Cytoplasmic Membrane [Class 3]
681	PA14_22050	NA	htrB	279.618	0.357519	0.119251	2.99805	0.0027171	0.0102958	NOT_CHANGE	lipid A biosynthesis lauroyl acyltransferase	Cytoplasmic Membrane [Class 3]
682	PA14_41210	PA1804	hupB	46.7145	1.75266	0.286022	6.12769	8.91623e-10	8.96349e-09	NOT_CHANGE	DNA-binding protein HU	Cytoplasmic [Class 3]
683	PA14_67420	PA5105	hutC	122.742	-0.0270532	0.173328	-0.156081	0.875969	0.932161	NOT_CHANGE	histidine utilization genes repressor protein	Cytoplasmic [Class 3]
684	PA14_67240	PA5091	hutG	1121.26	-0.541232	0.173664	-3.11655	0.00182983	0.00729626	NOT_CHANGE	N-formylglutamate amidohydrolase	Cytoplasmic [Class 3]
685	PA14_67320	PA5098	hutH	181.551	0.115789	0.139405	0.830596	0.406202	0.563729	NOT_CHANGE	histidine ammonia-lyase	Cytoplasmic [Class 3]
686	PA14_67250	PA5092	hutI	2810.29	0.125985	0.129739	0.971061	0.331518	0.49094	NOT_CHANGE	imidazolonepropionase	Cytoplasmic [Class 3]
687	PA14_67350	PA5100	hutU	185.485	0.2023	0.119726	1.6897	0.091086	0.185034	NOT_CHANGE	urocanate hydratase	Cytoplasmic [Class 3]
688	PA14_55510	PA0679	hxcP	315.449	0.312418	0.091392	3.41844	0.000629804	0.00284411	NOT_CHANGE	HxcP	Cytoplasmic Membrane [Class 3]
689	PA14_55450	PA0685	hxcQ	143.01	2.341	0.167171	14.0037	1.47995e-44	7.25939e-43	UP	HxcQ	Outer Membrane [Class 1] ; Outer Membrane [Class 3]
690	PA14_55440	PA0686	hxcR	15.093	0.0209003	0.372893	0.056049	0.955303	0.976585	NOT_CHANGE	HxcR	Cytoplasmic [Class 3]
691	PA14_55430	PA0687	hxcS	1881.92	-0.149658	0.0727259	-2.05784	0.0396057	0.0970526	NOT_CHANGE	HxcS	Cytoplasmic Membrane [Class 3]
692	PA14_55490	PA0681	hxcT	1228.69	0.0741069	0.0615149	1.2047	0.228319	0.374932	NOT_CHANGE	HxcT	Cytoplasmic Membrane [Class 3]
693	PA14_55500	PA0680	hxcV	132.728	0.343745	0.147187	2.33542	0.0195214	0.0541837	NOT_CHANGE	HxcV	Unknown [Class 3]
694	PA14_55530	PA0677	hxcW	912.275	-0.0696067	0.0908477	-0.766191	0.443563	0.59891	NOT_CHANGE	HxcW	Unknown [Class 3]
695	PA14_55480	PA0682	hxcX	1842.51	-0.0586013	0.0548964	-1.06749	0.285751	0.442162	NOT_CHANGE	HxcX	Cytoplasmic Membrane [Class 3]
696	PA14_55470	PA0683	hxcY	555.636	-0.176169	0.0833887	-2.11262	0.0346334	0.087235	NOT_CHANGE	HxcY	Unknown [Class 3]
697	PA14_55460	PA0684	hxcZ	8.25181	0.208149	0.544066	0.38258	0.702031	0.809919	NOT_CHANGE	HxcZ	Unknown [Class 3]
698	PA14_23680	PA3126	ibpA	387.004	0.139931	0.109824	1.27414	0.202613	0.344139	NOT_CHANGE	heat-shock protein IbpA	Cytoplasmic [Class 3]
699	PA14_30190	PA2623	icd	1494.79	-0.215706	0.116199	-1.85635	0.0634035	0.140376	NOT_CHANGE	isocitrate dehydrogenase	Cytoplasmic [Class 3]
700	PA14_56740	PA4363	iciA	1389.37	-0.0853966	0.0978748	-0.872508	0.382931	0.541698	NOT_CHANGE	chromosome replication initiation inhibitor protein	Cytoplasmic [Class 3]
701	PA14_00910	PA0077	icmF1	554.654	-0.411083	0.109017	-3.7708	0.000162724	0.000833394	NOT_CHANGE	IcmF1	Cytoplasmic Membrane [Class 3]
702	PA14_42900	PA1669	icmF2	151.929	0.088917	0.159733	0.556659	0.577761	0.714976	NOT_CHANGE	IcmF2	Cytoplasmic Membrane [Class 3]
703	PA14_34130	PA2361	icmF3	272.363	-0.569582	0.116752	-4.87855	1.0687e-06	7.78605e-06	NOT_CHANGE	IcmF3	Unknown (This protein may have multiple localization sites) [Class 3]
704	PA14_56830	PA4370	icmP	413.659	-0.892717	0.104968	-8.50463	1.8217e-17	3.04868e-16	NOT_CHANGE	metalloproteinase outer membrane	Outer Membrane [Class 3]
705	PA14_54220	PA0778	icp	191.898	0.17439	0.141228	1.23482	0.216898	0.361535	NOT_CHANGE	inhibitor of cysteine peptidase	Unknown [Class 3]
706	PA14_30180	PA2624	idh	668.567	-0.0374018	0.0891175	-0.419691	0.674711	0.791732	NOT_CHANGE	monomeric isocitrate dehydrogenase	Unknown (This protein may have multiple localization sites) [Class 3]
707	PA14_28720	NA	ihfA	422.598	0.164049	0.112521	1.45794	0.144858	0.268307	NOT_CHANGE	integration host factor subunit alpha	Cytoplasmic [Class 3]
708	PA14_23340	NA	ihfB	1201.03	-0.417278	0.10969	-3.80415	0.000142293	0.000732714	NOT_CHANGE	integration host factor subunit beta	Cytoplasmic [Class 3]
709	PA14_60370	PA4560	ileS	176.588	0.765665	0.152328	5.02642	4.99721e-07	3.80135e-06	NOT_CHANGE	isoleucyl-tRNA synthetase	Cytoplasmic [Class 3]
710	PA14_04320	PA0331	ilvA1	672.515	-0.618374	0.0827903	-7.46916	8.07068e-14	1.09079e-12	NOT_CHANGE	threonine dehydratase	Cytoplasmic [Class 3]
711	PA14_62130	PA4694	ilvC	274.047	3.025	0.152336	19.8574	9.50438e-88	1.352e-85	UP	ketol-acid reductoisomerase	Cytoplasmic [Class 3]
712	PA14_04630	PA0353	ilvD	16.0223	1.32005	0.37989	3.47482	0.000511197	0.00237059	NOT_CHANGE	dihydroxy-acid dehydratase	Cytoplasmic [Class 3]
713	PA14_66260	PA5013	ilvE	1880.09	-0.473806	0.0532302	-8.90108	5.53068e-19	9.95872e-18	NOT_CHANGE	branched-chain amino acid aminotransferase	Cytoplasmic [Class 3]
714	PA14_62150	PA4695	ilvH	942.973	0.974169	0.0936482	10.4024	2.41687e-25	6.11199e-24	NOT_CHANGE	acetolactate synthase 3 regulatory subunit	Cytoplasmic [Class 3]
715	PA14_62160	PA4696	ilvI	110.508	1.61259	0.162134	9.94604	2.62423e-23	5.85562e-22	NOT_CHANGE	acetolactate synthase 3 catalytic subunit	Cytoplasmic [Class 3]
716	PA14_56920	NA	inaA	307.058	0.269395	0.10877	2.47674	0.013259	0.0396862	NOT_CHANGE	InaA protein	Cytoplasmic [Class 3]
717	PA14_30240	PA2619	infA	134.883	-0.13805	0.135819	-1.01643	0.309425	0.468861	NOT_CHANGE	translation initiation factor IF-1	Cytoplasmic [Class 3]
718	PA14_62760	PA4744	infB	413.729	-0.454143	0.0914732	-4.96477	6.87822e-07	5.11595e-06	NOT_CHANGE	translation initiation factor IF-2	Cytoplasmic [Class 3]
719	PA14_28660	PA2743	infC	428.652	-0.00900298	0.107284	-0.0839172	0.933122	0.965541	NOT_CHANGE	translation initiation factor IF-3	Cytoplasmic [Class 3]
720	PA14_64570	PA4885	irlR	362.913	-0.0708967	0.0972193	-0.729246	0.465851	0.619195	NOT_CHANGE	two-component response regulator	Cytoplasmic [Class 3]
721	PA14_14730	PA3814	iscS	13.0101	-0.52835	0.462198	-1.14313	0.252987	0.403446	NOT_CHANGE	cysteine desulfurase	Cytoplasmic [Class 3]
722	PA14_11560	PA4043	ispA	1126.49	-0.291663	0.0693276	-4.20703	2.58745e-05	0.000152724	NOT_CHANGE	geranyltranstransferase	Cytoplasmic [Class 3]
723	PA14_60470	PA4569	ispB	576.507	0.176061	0.117707	1.49576	0.134716	0.252898	NOT_CHANGE	octaprenyl-diphosphate synthase	Cytoplasmic [Class 3]
724	PA14_17340	NA	ispD	1340.98	-1.43163	0.0784976	-18.2379	2.58412e-74	2.7229e-72	NOT_CHANGE	2-C-methyl-D-erythritol 4-phosphate cytidylyltransferase	Cytoplasmic [Class 3]
725	PA14_17420	NA	ispF	348.179	-0.437837	0.0979303	-4.4709	7.78896e-06	5.0535e-05	NOT_CHANGE	2-C-methyl-D-erythritol 2,4-cyclodiphosphate synthase	Cytoplasmic [Class 3]
726	PA14_14880	NA	ispG	275.527	0.570063	0.11442	4.98221	6.28609e-07	4.72495e-06	NOT_CHANGE	4-hydroxy-3-methylbut-2-en-1-yl diphosphate synthase	Cytoplasmic [Class 3]
727	PA14_60330	NA	ispH	6.29915	-1.20483	0.572586	-2.10419	0.0353622	0.0887173	NOT_CHANGE	4-hydroxy-3-methylbut-2-enyl diphosphate reductase	Cytoplasmic [Class 3]
728	PA14_09150	PA4236	katA	1235.26	0.200597	0.0858728	2.33597	0.0194927	0.0541524	NOT_CHANGE	catalase	Unknown (This protein may have multiple localization sites) [Class 3]
729	PA14_61040	PA4613	katB	50.0518	-0.0995018	0.225356	-0.441531	0.658829	0.779407	NOT_CHANGE	catalase	Periplasmic [Class 3]
730	PA14_36810	PA2147	katE	98.9352	-0.45131	0.187186	-2.41103	0.0159077	0.0460168	NOT_CHANGE	hydroperoxidase II	Cytoplasmic [Class 3]
731	PA14_43405	NA	kdbF	913.686	0.00641365	0.0645508	0.0993582	0.920854	0.959874	NOT_CHANGE	potassium-transporting ATPase subunit F	Cytoplasmic Membrane [Class 3]
732	PA14_23620	NA	kdgA	1712.95	-0.234194	0.0755294	-3.10069	0.00193068	0.00765285	NOT_CHANGE	aldolase	Cytoplasmic [Class 3]
733	PA14_43400	PA1633	kdpA	1540.25	0.130865	0.0804692	1.62627	0.103892	0.206266	NOT_CHANGE	potassium-transporting ATPase subunit A	Cytoplasmic Membrane [Class 3]
734	PA14_43380	PA1634	kdpB	186.099	-0.0734338	0.121728	-0.60326	0.546336	0.687803	NOT_CHANGE	potassium-transporting ATPase subunit B	Cytoplasmic Membrane [Class 3]
735	PA14_43370	PA1635	kdpC	117.828	0.14673	0.147576	0.994274	0.32009	0.479545	NOT_CHANGE	potassium-transporting ATPase subunit C	Cytoplasmic Membrane [Class 3]
736	PA14_43350	PA1636	kdpD	5470.22	-0.480608	0.0963479	-4.98826	6.09264e-07	4.58559e-06	NOT_CHANGE	two-component sensor KdpD	Cytoplasmic Membrane [Class 3]
737	PA14_43340	PA1637	kdpE	157.347	0.220162	0.121515	1.81182	0.0700143	0.15098	NOT_CHANGE	two-component response regulator KdpE	Cytoplasmic [Class 3]
738	PA14_25530	PA2979	kdsB	37.6535	1.00464	0.287026	3.50017	0.000464955	0.00217565	NOT_CHANGE	3-deoxy-manno-octulosonate cytidylyltransferase	Cytoplasmic [Class 3]
739	PA14_48700	PA1207	kefB	580.347	0.596325	0.0813572	7.32971	2.30645e-13	3.01694e-12	NOT_CHANGE	glutathione-regulated potassium-efflux system protein KefB	Cytoplasmic Membrane [Class 3]
740	PA14_07730	PA0592	ksgA	432.402	-0.383375	0.0891387	-4.30088	1.70119e-05	0.000103972	NOT_CHANGE	dimethyladenosine transferase	Cytoplasmic [Class 3]
741	PA14_52400	PA0917	kup	2006.03	-0.276275	0.0806066	-3.42744	0.000609296	0.00276247	NOT_CHANGE	potassium uptake protein Kup	Cytoplasmic Membrane [Class 3]
742	PA14_37590	PA2081	kynB	201.489	0.0108862	0.126791	0.085859	0.931578	0.96534	NOT_CHANGE	kynurenine formamidase, KynB	Cytoplasmic [Class 3]
743	PA14_04780	PA0364	laoA	246.614	-0.0697791	0.119723	-0.582836	0.560004	0.700466	NOT_CHANGE	LaoA	Unknown [Class 3]
744	PA14_04790	PA0365	laoB	1249.6	0.0907936	0.0773409	1.17394	0.240419	0.388742	NOT_CHANGE	LaoB	Cytoplasmic Membrane [Class 3]
745	PA14_04810	PA0366	laoC	2471.1	-0.172929	0.0844159	-2.04854	0.0405076	0.0988371	NOT_CHANGE	LaoC	Cytoplasmic [Class 3]
746	PA14_04820	PA0367	laoR	1544.11	0.0831915	0.0605789	1.37328	0.169667	0.301628	NOT_CHANGE	LaoR	Cytoplasmic [Class 3]
747	PA14_55410	NA	lapC	599.551	-0.376409	0.088812	-4.23827	2.25253e-05	0.000134349	NOT_CHANGE	LapC	Extracellular [Class 1] ; Extracellular [Class 3]
748	PA14_40290	PA1871	lasA	7.13921	-1.0461	0.524611	-1.99405	0.0461461	0.109288	NOT_CHANGE	LasA protease	Outer Membrane [Class 3]
749	PA14_16250	PA3724	lasB	888.268	-0.118484	0.0693823	-1.7077	0.087692	0.179614	NOT_CHANGE	elastase LasB	Extracellular [Class 3]
750	PA14_45940	PA1432	lasI	739.706	0.182235	0.0817792	2.22838	0.0258552	0.0687137	NOT_CHANGE	autoinducer synthesis protein LasI	Cytoplasmic [Class 3]
751	PA14_45960	PA1430	lasR	417.861	0.208688	0.176864	1.17993	0.238027	0.386259	NOT_CHANGE	transcriptional regulator LasR	Cytoplasmic [Class 3]
752	PA14_19870	PA3418	ldh	366.363	-0.0716285	0.0938622	-0.763123	0.44539	0.600471	NOT_CHANGE	leucine dehydrogenase	Cytoplasmic [Class 3]
753	PA14_52270	PA0927	ldhA	1349.29	-0.125889	0.111497	-1.12908	0.258863	0.410307	NOT_CHANGE	D-lactate dehydrogenase	Cytoplasmic [Class 3]
754	PA14_20610	PA3361	lecB	64.9849	1.76024	0.231925	7.58969	3.20672e-14	4.45031e-13	NOT_CHANGE	fucose-binding lectin PA-IIL	Unknown [Class 3]
755	PA14_54370	PA0767	lepA	653.506	1.58931	0.16763	9.48107	2.5168e-21	5.06029e-20	NOT_CHANGE	GTP-binding protein LepA	Cytoplasmic Membrane [Class 3]
756	PA14_54370	PA4541	lepA	653.506	1.58931	0.16763	9.48107	2.5168e-21	5.06029e-20	NOT_CHANGE	GTP-binding protein LepA	Cytoplasmic Membrane [Class 3]
757	PA14_54350	PA0768	lepB	315.649	1.03871	0.162243	6.40217	1.53183e-10	1.65705e-09	NOT_CHANGE	signal peptidase I	Cytoplasmic Membrane [Class 3]
758	PA14_15030	PA3792	leuA	1755.24	0.334758	0.0814015	4.11242	3.91528e-05	0.000224124	NOT_CHANGE	2-isopropylmalate synthase	Cytoplasmic [Class 3]
759	PA14_23790	PA3118	leuB	1842.14	-0.153817	0.0593615	-2.59119	0.00956459	0.0301992	NOT_CHANGE	3-isopropylmalate dehydrogenase	Cytoplasmic [Class 3]
760	PA14_23750	PA3121	leuC	127.986	2.01602	0.210728	9.56694	1.10115e-21	2.27837e-20	UP	isopropylmalate isomerase large subunit	Cytoplasmic [Class 3]
761	PA14_23760	PA3120	leuD	82.7179	0.518246	0.200712	2.58204	0.00982178	0.0308592	NOT_CHANGE	isopropylmalate isomerase small subunit	Cytoplasmic [Class 3]
762	PA14_12230	PA3987	leuS	9.87566	1.38206	0.532478	2.59553	0.00944462	0.0299721	NOT_CHANGE	leucyl-tRNA synthetase	Cytoplasmic [Class 3]
763	PA14_25160	PA3007	lexA	10.4815	0.478846	0.461151	1.03837	0.299097	0.45749	NOT_CHANGE	LexA repressor	Cytoplasmic [Class 3]
764	PA14_04460	PA0341	lgt	1237.97	0.146777	0.0657243	2.23323	0.0255338	0.0680821	NOT_CHANGE	prolipoprotein diacylglyceryl transferase	Cytoplasmic Membrane [Class 3]
765	PA14_44660	NA	ligA	83.5802	-1.15268	0.17757	-6.49141	8.50339e-11	9.35867e-10	NOT_CHANGE	NAD-dependent DNA ligase LigA	Cytoplasmic [Class 3]
766	PA14_36910	PA2138	ligD	484.394	-0.626365	0.0926728	-6.75888	1.39061e-11	1.6281e-10	NOT_CHANGE	ATP-dependent DNA ligase	Cytoplasmic [Class 3]
767	PA14_27110	PA2861	ligT	459.494	0.00944631	0.104102	0.0907411	0.927698	0.9636	NOT_CHANGE	2'-5' RNA ligase	Unknown [Class 3]
768	PA14_42960	NA	lip2.2	13.3803	-0.0139307	0.400512	-0.0347822	0.972253	0.984714	NOT_CHANGE	Lip2.2	Unknown [Class 3]
769	PA14_34080	PA2364	lip3	455.556	0.0776792	0.0910558	0.853094	0.393607	0.552857	NOT_CHANGE	Lip3	Unknown [Class 3]
770	PA14_27100	PA2862	lipA	626.086	-0.00486778	0.113979	-0.0427076	0.965935	0.981356	NOT_CHANGE	lactonizing lipase	Outer Membrane [Class 3]
771	PA14_12120	PA3997	lipB	846.668	-0.045653	0.0812192	-0.562096	0.574051	0.711873	NOT_CHANGE	lipoate-protein ligase B	Cytoplasmic [Class 3]
772	PA14_63620	PA4813	lipC	482.174	0.485164	0.117149	4.14144	3.45135e-05	0.000198968	NOT_CHANGE	lipase LipC	Unknown (This protein may have multiple localization sites) [Class 3]
773	PA14_12130	PA3996	lis	1038.84	-0.48548	0.0880913	-5.5111	3.56589e-08	3.10719e-07	NOT_CHANGE	lipoyl synthase	Cytoplasmic [Class 3]
774	PA14_50550	NA	livG	2450.74	0.0386589	0.0710193	0.544343	0.586205	0.722128	NOT_CHANGE	leucine/isoleucine/valine transporter ATP-binding subunit	Cytoplasmic Membrane [Class 3]
775	PA14_50540	NA	livM	638.009	-0.121541	0.148769	-0.816977	0.413942	0.571127	NOT_CHANGE	leucine/isoleucine/valine transporter permease subunit	Cytoplasmic Membrane [Class 3]
776	PA14_33860	PA2382	lldA	334.461	1.4172	0.174293	8.13111	4.25361e-16	6.70444e-15	NOT_CHANGE	L-lactate dehydrogenase	Cytoplasmic [Class 3]
777	PA14_63080	PA4770	lldP	46.4992	0.429537	0.232864	1.84458	0.0650983	0.143015	NOT_CHANGE	L-lactate permease	Cytoplasmic Membrane [Class 3]
778	PA14_12280	PA3984	lnt	1257.16	1.0816	0.105756	10.2274	1.49544e-24	3.60553e-23	NOT_CHANGE	apolipoprotein N-acyltransferase	Cytoplasmic Membrane [Class 3]
779	PA14_30310	PA2614	lolA	210.799	-0.102276	0.120842	-0.846361	0.397351	0.555784	NOT_CHANGE	outer-membrane lipoprotein carrier protein	Periplasmic [Class 3]
780	PA14_61740	PA4668	lolB	52.8944	0.617236	0.248557	2.48328	0.0130179	0.0391088	NOT_CHANGE	outer membrane lipoprotein LolB	Unknown [Class 3]
781	PA14_41220	PA1803	lon	393.693	-0.16051	0.105787	-1.5173	0.129192	0.245525	NOT_CHANGE	Lon protease	Cytoplasmic [Class 3]
782	PA14_63850	PA4829	lpd3	615.186	-0.592998	0.0977282	-6.06782	1.29654e-09	1.29108e-08	NOT_CHANGE	dihydrolipoamide dehydrogenase	Cytoplasmic [Class 3]
783	PA14_43970	NA	lpdG	406.984	-1.0377	0.086822	-11.952	6.33681e-33	2.12097e-31	NOT_CHANGE	dihydrolipoamide dehydrogenase	Cytoplasmic [Class 3]
784	PA14_35490	PA2250	lpdV	767.055	-0.095619	0.13341	-0.716728	0.473542	0.625453	NOT_CHANGE	dihydrolipoamide dehydrogenase	Cytoplasmic [Class 3]
785	PA14_69660	PA5276	lppL	40.5144	1.34473	0.267328	5.03028	4.89763e-07	3.73559e-06	NOT_CHANGE	lipopeptide LppL	Unknown [Class 3]
786	PA14_17210	PA3644	lpxA	470.382	1.53496	0.184979	8.29801	1.05872e-16	1.72117e-15	NOT_CHANGE	UDP-N-acetylglucosamine acyltransferase	Cytoplasmic [Class 3]
787	PA14_57260	PA4406	lpxC	544.089	0.277825	0.0882958	3.14653	0.00165221	0.0067007	NOT_CHANGE	UDP-3-O-[3-hydroxymyristoyl] N-acetylglucosamine deacetylase	Cytoplasmic [Class 3]
788	PA14_17180	PA3646	lpxD	131.937	0.642085	0.201687	3.18357	0.00145472	0.00598941	NOT_CHANGE	UDP-3-O-[3-hydroxymyristoyl] glucosamine N-acyltransferase	Cytoplasmic [Class 3]
789	PA14_25510	PA2981	lpxK	777.858	0.661259	0.089726	7.36976	1.7093e-13	2.25137e-12	NOT_CHANGE	tetraacyldisaccharide 4'-kinase	Cytoplasmic [Class 3]
790	PA14_58550	PA4512	lpxO1	867.438	-0.296208	0.0726798	-4.07552	4.59118e-05	0.00025968	NOT_CHANGE	lipopolysaccharide biosynthetic protein LpxO1	Cytoplasmic Membrane [Class 3]
791	PA14_52150	PA0936	lpxO2	2975.92	0.162856	0.0747813	2.17776	0.0294238	0.0762959	NOT_CHANGE	lipopolysaccharide biosynthetic protein LpxO2	Cytoplasmic Membrane [Class 3]
792	PA14_70080	PA5308	lrp	876.474	-0.0282534	0.0831853	-0.339644	0.734125	0.833046	NOT_CHANGE	leucine-responsive regulatory protein	Cytoplasmic [Class 3]
793	PA14_19490	PA3450	lsfA	82.9038	0.0453415	0.171093	0.265011	0.791001	0.875301	NOT_CHANGE	1-Cys peroxiredoxin LsfA	Cytoplasmic [Class 3]
794	PA14_60360	PA4559	lspA	1742.39	0.352623	0.0773669	4.5578	5.16925e-06	3.42012e-05	NOT_CHANGE	lipoprotein signal peptidase	Cytoplasmic Membrane [Class 3]
795	PA14_71440	PA5413	ltaA	217.603	0.120995	0.161042	0.751327	0.452456	0.607187	NOT_CHANGE	low specificity l-threonine aldolase	Unknown [Class 3]
796	PA14_69670	PA5277	lysA	703.766	0.138332	0.108208	1.2784	0.20111	0.342301	NOT_CHANGE	diaminopimelate decarboxylase	Cytoplasmic [Class 3]
797	PA14_52580	PA0904	lysC	797.269	0.016015	0.080015	0.20015	0.841363	0.911532	NOT_CHANGE	aspartate kinase	Cytoplasmic [Class 3]
798	PA14_61250	PA4981	lysP	332.671	-0.0917903	0.114023	-0.805019	0.420809	0.577084	NOT_CHANGE	APC family lysine-specific permease	Cytoplasmic Membrane [Class 3]
799	PA14_61250	PA4628	lysP	332.671	-0.0917903	0.114023	-0.805019	0.420809	0.577084	NOT_CHANGE	APC family lysine-specific permease	Cytoplasmic Membrane [Class 3]
800	PA14_16530	PA3700	lysS	17.3667	1.75188	0.393204	4.4554	8.37382e-06	5.40216e-05	NOT_CHANGE	lysyl-tRNA synthetase	Cytoplasmic [Class 3]
801	PA14_66680	NA	maeB	194.313	0.542408	0.118685	4.57014	4.87403e-06	3.2589e-05	NOT_CHANGE	malic enzyme	Cytoplasmic [Class 3]
802	PA14_17050	PA3657	map	556.833	0.224984	0.133647	1.68342	0.0922935	0.18682	NOT_CHANGE	methionine aminopeptidase	Cytoplasmic [Class 3]
803	PA14_42720	PA1685	masA	110.542	1.28559	0.183656	7.00001	2.55947e-12	3.1252e-11	NOT_CHANGE	enolase-phosphatase	Cytoplasmic [Class 3]
804	PA14_02550	PA0208	mdcA	576.801	-0.135691	0.0760036	-1.78532	0.0742095	0.157733	NOT_CHANGE	malonate decarboxylase subunit alpha	Cytoplasmic [Class 3]
805	PA14_02570	PA0210	mdcC	98.8178	0.412991	0.162172	2.54663	0.010877	0.0338382	NOT_CHANGE	malonate decarboxylase subunit delta	Cytoplasmic [Class 3]
806	PA14_02580	PA0211	mdcD	49.119	-0.589648	0.248717	-2.37076	0.0177518	0.0503528	NOT_CHANGE	malonate decarboxylase subunit beta	Cytoplasmic [Class 3]
807	PA14_02590	PA0212	mdcE	160.384	0.0662304	0.146451	0.452235	0.6511	0.773113	NOT_CHANGE	malonate decarboxylase subunit gamma	Cytoplasmic [Class 3]
808	PA14_64770	PA4901	mdlC	175.319	0.329235	0.121099	2.71873	0.00655338	0.0220513	NOT_CHANGE	benzoylformate decarboxylase	Cytoplasmic [Class 3]
809	PA14_67090	NA	mdoG	93.2297	0.0730532	0.149271	0.489401	0.624558	0.751636	NOT_CHANGE	glucan biosynthesis protein G	Periplasmic [Class 3]
810	PA14_67065	NA	mdoH	296.136	0.177944	0.106581	1.66957	0.0950054	0.191153	NOT_CHANGE	glucosyltransferase MdoH	Cytoplasmic Membrane [Class 3]
811	PA14_58375	PA4498	mdpA	705.684	-0.320378	0.0953749	-3.35915	0.00078184	0.00344858	NOT_CHANGE	metallopeptidase MdpA	Cytoplasmic [Class 3]
812	PA14_15460	NA	merA	3225.4	0.280539	0.0899468	3.11895	0.00181498	0.00724717	NOT_CHANGE	mercuric reductase	Cytoplasmic [Class 3]
813	PA14_15450	NA	merD	2318.26	-0.381051	0.0729018	-5.22691	1.72366e-07	1.38526e-06	NOT_CHANGE	transcriptional regulator MerD	Unknown [Class 3]
814	PA14_15445	NA	merE	1708.97	-0.170729	0.0910807	-1.87448	0.0608643	0.13655	NOT_CHANGE	mercury resistance protein	Cytoplasmic Membrane [Class 3]
815	PA14_15470	NA	merP	38.9521	0.222184	0.259623	0.855794	0.392112	0.551301	NOT_CHANGE	periplasmic mercuric ion binding protein, MerP	Cytoplasmic Membrane [Class 3]
816	PA14_15480	NA	merR	89.867	0.0347825	0.156649	0.22204	0.824283	0.899016	NOT_CHANGE	transcriptional regulator MerR	Cytoplasmic [Class 3]
817	PA14_15475	NA	merT	346.499	-0.067047	0.0997995	-0.671817	0.5017	0.649823	NOT_CHANGE	mercuric transport protein	Cytoplasmic Membrane [Class 3]
818	PA14_39590	PA1927	metE	947.186	0.0747731	0.0700659	1.06718	0.28589	0.442162	NOT_CHANGE	5- methyltetrahydropteroyltriglutamate/homocysteine S-methyltransferase	Cytoplasmic [Class 3]
819	PA14_05590	PA0430	metF	1310.14	0.739188	0.0726108	10.1801	2.43213e-24	5.76616e-23	NOT_CHANGE	5,10-methylenetetrahydrofolate reductase	Cytoplasmic [Class 3]
820	PA14_19050	PA3482	metG	13.1918	2.15611	0.454733	4.74149	2.12157e-06	1.4885e-05	UP	methionyl-tRNA synthetase	Cytoplasmic [Class 3]
821	PA14_40670	PA1843	metH	17.771	0.640927	0.376964	1.70023	0.089087	0.181719	NOT_CHANGE	B12-dependent methionine synthase	Cytoplasmic [Class 3]
822	PA14_07090	PA0546	metK	786.258	-0.148321	0.111919	-1.32525	0.185087	0.321277	NOT_CHANGE	S-adenosylmethionine synthetase	Cytoplasmic [Class 3]
823	PA14_72620	NA	metN	134.701	0.0440654	0.128773	0.342195	0.732204	0.832582	NOT_CHANGE	DL-methionine transporter ATP-binding subunit	Cytoplasmic Membrane [Class 3]
824	PA14_17900	PA3587	metR	1119.52	0.228854	0.0784072	2.91878	0.003514	0.0128089	NOT_CHANGE	transcriptional regulator MetR	Cytoplasmic [Class 3]
825	PA14_05080	PA0390	metX	61.3635	1.45054	0.243058	5.96789	2.40345e-09	2.32184e-08	NOT_CHANGE	homoserine O-acetyltransferase	Cytoplasmic [Class 3]
826	PA14_66440	PA5025	metY	117.369	-0.0880538	0.147919	-0.595284	0.551654	0.692458	NOT_CHANGE	O-acetylhomoserine aminocarboxypropyltransferase	Cytoplasmic [Class 3]
827	PA14_23930	PA3107	metZ	230.7	1.12885	0.219046	5.1535	2.55676e-07	2.02336e-06	NOT_CHANGE	O-succinylhomoserine sulfhydrylase	Cytoplasmic [Class 3]
828	PA14_05530	PA0425	mexA	407.161	0.720017	0.0976174	7.3759	1.63235e-13	2.16002e-12	NOT_CHANGE	RND multidrug efflux membrane fusion protein MexA	Cytoplasmic Membrane [Class 3]
829	PA14_05540	PA0426	mexB	187.703	0.657287	0.136231	4.82481	1.40138e-06	1.003e-05	NOT_CHANGE	RND multidrug efflux transporter MexB	Cytoplasmic Membrane [Class 3]
830	PA14_60850	PA4599	mexC	1288.77	-0.194746	0.10083	-1.93143	0.05343	0.123099	NOT_CHANGE	multidrug efflux RND membrane fusion protein	Cytoplasmic Membrane [Class 3]
831	PA14_60830	PA4598	mexD	1278.86	-0.0417331	0.0923856	-0.451727	0.651466	0.773386	NOT_CHANGE	multidrug efflux RND transporter MexD	Cytoplasmic Membrane [Class 3]
832	PA14_32390	PA2494	mexF	624.556	-0.0178085	0.0890676	-0.199944	0.841525	0.911532	NOT_CHANGE	RND multidrug efflux transporter MexF	Cytoplasmic Membrane [Class 3]
833	PA14_09540	PA4205	mexG	451.755	0.145949	0.0974058	1.49836	0.134039	0.252209	NOT_CHANGE	hypothetical protein	Cytoplasmic Membrane [Class 3]
834	PA14_09530	PA4206	mexH	742.894	0.0677712	0.0758923	0.892993	0.371861	0.530708	NOT_CHANGE	RND efflux membrane fusion protein	Cytoplasmic Membrane [Class 3]
835	PA14_09520	PA4207	mexI	310.436	0.185692	0.0909935	2.04072	0.041279	0.100332	NOT_CHANGE	RND efflux transporter	Cytoplasmic Membrane [Class 3]
836	PA14_05520	PA0424	mexR	2681.19	-0.119143	0.0470952	-2.52984	0.0114115	0.0351933	NOT_CHANGE	multidrug resistance operon repressor MexR	Cytoplasmic [Class 3]
837	PA14_32410	PA2492	mexT	201.253	-0.109496	0.116061	-0.943431	0.34546	0.503889	NOT_CHANGE	transcriptional regulator MexT	Cytoplasmic Membrane [Class 3]
838	PA14_25230	PA3002	mfd	433.058	-0.0327215	0.140424	-0.233019	0.815747	0.892531	NOT_CHANGE	transcription-repair coupling factor	Cytoplasmic [Class 3]
839	PA14_63800	PA4825	mgtA	1852.98	0.155187	0.0763603	2.03229	0.0421238	0.101734	NOT_CHANGE	Mg(2+) transport ATPase, P-type 2	Cytoplasmic Membrane [Class 3]
840	PA14_52460	PA0913	mgtE	210.465	0.916169	0.121662	7.53045	5.05671e-14	6.94992e-13	NOT_CHANGE	Mg transporter MgtE	Cytoplasmic Membrane [Class 3]
841	PA14_65320	PA4945	miaA	120.074	0.368992	0.168084	2.19529	0.0281428	0.0735095	NOT_CHANGE	tRNA delta(2)-isopentenylpyrophosphate transferase	Cytoplasmic [Class 3]
842	PA14_22040	PA3243	minC	2162.28	-0.258556	0.0688414	-3.75583	0.00017277	0.000882459	NOT_CHANGE	septum formation inhibitor	Cytoplasmic [Class 3]
843	PA14_22020	PA3244	minD	35.0147	-0.340367	0.246623	-1.38011	0.167553	0.298676	NOT_CHANGE	cell division inhibitor MinD	Cytoplasmic [Class 3]
844	PA14_22010	PA3245	minE	119.369	-0.000265478	0.143849	-0.00184553	0.998527	0.998876	NOT_CHANGE	cell division topological specificity factor MinE	Cytoplasmic [Class 3]
845	PA14_57730	PA4444	mltB1	111.41	-0.411214	0.15321	-2.68399	0.00727492	0.0240192	NOT_CHANGE	murein hydrolase B	Cytoplasmic Membrane [Class 3]
846	PA14_18120	PA3570	mmsA	220.674	-1.413	0.131782	-10.7222	8.0041e-27	2.13818e-25	NOT_CHANGE	methylmalonate-semialdehyde dehydrogenase	Cytoplasmic [Class 3]
847	PA14_18140	PA3569	mmsB	1158.72	-0.158087	0.0750376	-2.10677	0.0351379	0.0882714	NOT_CHANGE	3-hydroxyisobutyrate dehydrogenase	Cytoplasmic [Class 3]
848	PA14_18110	PA3571	mmsR	285.293	-0.0745893	0.0934715	-0.79799	0.424877	0.580795	NOT_CHANGE	transcriptional regulator MmsR	Cytoplasmic [Class 3]
849	PA14_30150	NA	mnmA	43.3007	-0.548686	0.221373	-2.47856	0.0131912	0.0395251	NOT_CHANGE	tRNA-specific 2-thiouridylase MnmA	Cytoplasmic [Class 3]
850	PA14_19400	NA	mnmC	521.192	-0.140875	0.0804656	-1.75075	0.0799886	0.167329	NOT_CHANGE	5-methylaminomethyl-2-thiouridine methyltransferase	Cytoplasmic [Class 3]
851	PA14_56340	NA	mntH1	1001.04	-0.262068	0.0972868	-2.69376	0.00706503	0.0234813	NOT_CHANGE	manganese transport protein MntH	Cytoplasmic Membrane [Class 3]
852	PA14_53800	NA	mntH2	757.546	-0.630832	0.0827579	-7.62262	2.48585e-14	3.48387e-13	NOT_CHANGE	manganese transport protein MntH	Cytoplasmic Membrane [Class 3]
853	PA14_13850	NA	moaA	382.802	-0.102322	0.111362	-0.918827	0.358186	0.516623	NOT_CHANGE	molybdenum cofactor biosynthesis protein A	Cytoplasmic [Class 3]
854	PA14_44970	PA1505	moaA2	116.579	-0.360936	0.165252	-2.18415	0.0289509	0.0752196	NOT_CHANGE	molybdenum cofactor biosynthesis protein A	Cytoplasmic [Class 3]
855	PA14_13260	PA3915	moaB1	92.1577	0.105218	0.152356	0.690606	0.489813	0.638642	NOT_CHANGE	MoaB1	Cytoplasmic [Class 3]
856	PA14_24900	PA3029	moaB2	285.974	0.145855	0.119344	1.22214	0.221655	0.367166	NOT_CHANGE	molybdopterin biosynthetic protein B2	Cytoplasmic [Class 3]
857	PA14_13230	PA3918	moaC	352.337	-0.00418656	0.101874	-0.0410955	0.96722	0.981356	NOT_CHANGE	molybdenum cofactor biosynthesis protein MoaC	Cytoplasmic [Class 3]
858	PA14_13240	PA3917	moaD	952.719	0.0437602	0.0711981	0.614625	0.538802	0.681285	NOT_CHANGE	molybdopterin converting factor, small subunit	Unknown [Class 3]
859	PA14_13250	PA3916	moaE	2222.11	-0.198028	0.0781917	-2.53259	0.0113222	0.0349746	NOT_CHANGE	molybdopterin converting factor, large subunit	Cytoplasmic [Class 3]
860	PA14_24890	PA3030	mobA	94.5643	-0.0132009	0.148034	-0.0891752	0.928943	0.963843	NOT_CHANGE	molybdopterin-guanine dinucleotide biosynthesis protein MobA	Cytoplasmic [Class 3]
861	PA14_40390	PA1863	modA	7.15541	0.417703	0.522938	0.798762	0.424429	0.580529	NOT_CHANGE	molybdate-binding periplasmic protein precursor modA	Periplasmic [Class 3]
862	PA14_40410	PA1862	modB	857.261	-0.170028	0.0668989	-2.54156	0.0110358	0.0342518	NOT_CHANGE	molybdenum transport protein ModB	Cytoplasmic Membrane [Class 3]
863	PA14_40420	PA1861	modC	445.602	-0.143625	0.0984634	-1.45866	0.144659	0.268026	NOT_CHANGE	molybdenum transport protein ModC	Cytoplasmic [Class 3]
864	PA14_13280	PA3914	moeA1	620.61	-0.243193	0.117642	-2.06723	0.0387123	0.0954288	NOT_CHANGE	molybdenum cofactor biosynthetic protein A1	Cytoplasmic [Class 3]
865	PA14_60870	PA4601	morA	208.78	0.534839	0.147089	3.63616	0.000276728	0.00136327	NOT_CHANGE	motility regulator	Cytoplasmic Membrane [Class 3]
866	PA14_26130	PA2932	morB	1188.19	1.21663	0.102302	11.8925	1.29418e-32	4.28134e-31	NOT_CHANGE	morphinone reductase	Cytoplasmic [Class 3]
867	PA14_65450	PA4954	motA	790.939	0.427303	0.173163	2.46764	0.0136008	0.0404964	NOT_CHANGE	flagellar motor protein MotA	Cytoplasmic Membrane [Class 3]
868	PA14_65430	PA4953	motB	1582.2	0.86631	0.345013	2.51095	0.0120407	0.0367749	NOT_CHANGE	flagellar motor protein MotB	Unknown (This protein may have multiple localization sites) [Class 3]
869	PA14_45560	PA1460	motC	701.695	-0.292196	0.0930229	-3.14112	0.00168301	0.00679986	NOT_CHANGE	flagellar motor protein	Cytoplasmic Membrane [Class 3]
870	PA14_45540	PA1461	motD	692.106	-0.212798	0.0967365	-2.19977	0.0278231	0.0728593	NOT_CHANGE	flagellar motor protein MotD	Cytoplasmic Membrane [Class 3]
871	PA14_11845	PA4020	mpl	481.438	-0.00623306	0.0902311	-0.0690788	0.944927	0.969986	NOT_CHANGE	UDP-N-acetylmuramate:L-alanyl-gamma-D-glutamyl- meso-diaminopimelate ligase	Cytoplasmic [Class 3]
872	PA14_19470	PA3452	mqoA	3165.51	0.151764	0.0735624	2.06306	0.0391069	0.0960372	NOT_CHANGE	malate:quinone oxidoreductase	Cytoplasmic [Class 3]
873	PA14_61400	PA4640	mqoB	6.98515	0.0574954	0.52479	0.109559	0.912759	0.955233	NOT_CHANGE	malate:quinone oxidoreductase	Cytoplasmic [Class 3]
874	PA14_57450	NA	mraW	268.617	0.244078	0.14263	1.71126	0.0870323	0.178649	NOT_CHANGE	S-adenosyl-methyltransferase MraW	Cytoplasmic [Class 3]
875	PA14_57380	PA4415	mraY	78.0508	0.648186	0.265162	2.44449	0.0145057	0.0427655	NOT_CHANGE	phospho-N-acetylmuramoyl-pentapeptide- transferase	Cytoplasmic Membrane [Class 3]
876	PA14_62200	PA4700	mrcB	177.911	-0.0667007	0.150647	-0.442762	0.657938	0.778795	NOT_CHANGE	penicillin-binding protein 1B	Cytoplasmic Membrane [Class 3]
877	PA14_58130	PA4480	mreC	1256.52	0.283837	0.0798419	3.55498	0.000378002	0.00180742	NOT_CHANGE	rod shape-determining protein MreC	Unknown [Class 3]
878	PA14_58120	PA4479	mreD	1059.58	0.429176	0.0816304	5.25755	1.45989e-07	1.17994e-06	NOT_CHANGE	rod shape-determining protein MreD	Cytoplasmic Membrane [Class 3]
879	PA14_66080	PA4997	msbA	0.820971	-0.0415953	1.39071	-0.0299093	0.976139	0.986893	NOT_CHANGE	transport protein MsbA	Cytoplasmic Membrane [Class 3]
880	PA14_61050	PA4614	mscL	1600.8	0.091032	0.0632506	1.43923	0.150086	0.27516	NOT_CHANGE	large-conductance mechanosensitive channel	Cytoplasmic Membrane [Class 3]
881	PA14_66330	PA5018	msrA	216.439	0.633013	0.157327	4.02354	5.73303e-05	0.000318875	NOT_CHANGE	peptide methionine sulfoxide reductase	Unknown [Class 3]
882	PA14_34190	PA2356	msuD	2672.17	0.176516	0.0687957	2.5658	0.0102939	0.0322356	NOT_CHANGE	methanesulfonate sulfonatase MsuD	Cytoplasmic [Class 3]
883	PA14_04950	NA	mtgA	26.5405	0.712599	0.290586	2.45229	0.0141952	0.041937	NOT_CHANGE	monofunctional biosynthetic peptidoglycan transglycosylase	Cytoplasmic Membrane [Class 3]
884	PA14_34360	PA2342	mtlD	565.873	-0.0915957	0.0886177	-1.0336	0.301321	0.460273	NOT_CHANGE	mannitol dehydrogenase	Cytoplasmic [Class 3]
885	PA14_34440	PA2337	mtlR	4238.09	-0.0252083	0.0512264	-0.492096	0.622651	0.750611	NOT_CHANGE	transcriptional regulator MtlR	Cytoplasmic [Class 3]
886	PA14_34350	PA2343	mtlY	1938.74	-0.0722509	0.0722866	-0.999507	0.317549	0.477157	NOT_CHANGE	xylulose kinase	Cytoplasmic [Class 3]
887	PA14_34340	PA2344	mtlZ	675.244	-0.234655	0.0731263	-3.2089	0.00133244	0.0055706	NOT_CHANGE	fructokinase	Unknown [Class 3]
888	PA14_23250	NA	mtnA	2810.21	-0.476923	0.069464	-6.86575	6.61416e-12	7.92307e-11	NOT_CHANGE	methylthioribose-1-phosphate isomerase	Cytoplasmic [Class 3]
889	PA14_71710	PA5434	mtr	455.982	0.510801	0.132125	3.86604	0.000110615	0.00058386	NOT_CHANGE	tryptophan permease	Cytoplasmic Membrane [Class 3]
890	PA14_27020	PA2866	mttC	1050.22	1.78052	0.0930152	19.1422	1.12409e-81	1.39045e-79	NOT_CHANGE	secretion protein MttC	Cytoplasmic [Class 3]
891	PA14_54420	PA0763	mucA	6.06772	1.16441	0.601959	1.93437	0.0530673	0.122481	NOT_CHANGE	anti-sigma factor MucA	Cytoplasmic Membrane [Class 3]
892	PA14_54410	PA0764	mucB	71.7737	0.157462	0.171308	0.919175	0.358004	0.516492	NOT_CHANGE	negative regulator for alginate biosynthesis MucB	Periplasmic [Class 3]
893	PA14_54400	PA0765	mucC	601.306	0.119547	0.141755	0.843335	0.399041	0.556779	NOT_CHANGE	positive regulator for alginate biosynthesis MucC	Cytoplasmic Membrane [Class 3]
894	PA14_54390	PA0766	mucD	63.6947	1.17304	0.215404	5.44576	5.15849e-08	4.38741e-07	NOT_CHANGE	serine protease MucD	Periplasmic [Class 3]
895	PA14_51150	PA1019	mucK	1061.86	0.0983983	0.0768802	1.27989	0.200583	0.34167	NOT_CHANGE	cis,cis-muconate transporter MucK	Cytoplasmic Membrane [Class 3]
896	PA14_57810	PA4450	murA	4.09275	1.01079	0.862506	1.17193	0.241227	0.389606	NOT_CHANGE	UDP-N-acetylglucosamine 1-carboxyvinyltransferase	Cytoplasmic [Class 3]
897	PA14_25550	PA2977	murB	651.317	0.968331	0.118968	8.13942	3.97161e-16	6.27735e-15	NOT_CHANGE	UDP-N-acetylenolpyruvoylglucosamine reductase	Cytoplasmic [Class 3]
898	PA14_57330	PA4411	murC	12.9614	-0.246451	0.39919	-0.617378	0.536986	0.680198	NOT_CHANGE	UDP-N-acetylmuramate--L-alanine ligase	Cytoplasmic [Class 3]
899	PA14_57370	PA4414	murD	101.141	-0.166316	0.193139	-0.86112	0.389172	0.548388	NOT_CHANGE	UDP-N-acetylmuramoyl-L-alanyl-D-glutamate synthetase	Cytoplasmic [Class 3]
900	PA14_57410	PA4417	murE	534.185	0.289876	0.117799	2.46078	0.0138635	0.0411789	NOT_CHANGE	UDP-N-acetylmuramoylalanyl-D-glutamate--2, 6-diaminopimelate ligase	Cytoplasmic [Class 3]
901	PA14_57390	PA4416	murF	366.997	0.304025	0.198686	1.53018	0.125972	0.24045	NOT_CHANGE	UDP-N-acetylmuramoylalanyl-D-glutamyl-2,6- diaminopimelate--D-alanyl-D-alanine ligase	Cytoplasmic [Class 3]
902	PA14_57340	PA4412	murG	797.825	1.46554	0.376599	3.89151	9.96218e-05	0.000531254	NOT_CHANGE	UDPdiphospho-muramoylpentapeptide beta-N- acetylglucosaminyltransferase	Cytoplasmic Membrane [Class 3]
903	PA14_61660	PA4662	murI	724.3	-0.263174	0.0900301	-2.92317	0.00346482	0.0126702	NOT_CHANGE	glutamate racemase	Cytoplasmic [Class 3]
904	PA14_65350	PA4946	mutL	525.531	-0.221722	0.0932433	-2.37789	0.017412	0.0495123	NOT_CHANGE	DNA mismatch repair protein	Cytoplasmic [Class 3]
905	PA14_04670	PA0357	mutM	30.6366	-0.0934856	0.245629	-0.380597	0.703502	0.810473	NOT_CHANGE	formamidopyrimidine-DNA glycosylase	Cytoplasmic [Class 3]
906	PA14_17500	PA3620	mutS	1899.53	-0.215736	0.0633435	-3.4058	0.000659696	0.00295797	NOT_CHANGE	DNA mismatch repair protein MutS	Cytoplasmic [Class 3]
907	PA14_67990	PA5147	mutY	1528.66	0.0973726	0.0945398	1.02996	0.303027	0.46201	NOT_CHANGE	A/G-specific adenine glycosylase	Cytoplasmic [Class 3]
908	PA14_56070	PA4315	mvaT	105.882	-0.0440165	0.138196	-0.318508	0.750099	0.843991	NOT_CHANGE	transcriptional regulator MvaT, P16 subunit	Cytoplasmic [Class 3]
909	PA14_51340	PA1003	mvfR	1635.42	-0.158079	0.120437	-1.31254	0.189337	0.327455	NOT_CHANGE	transcriptional regulator MvfR	Cytoplasmic Membrane [Class 1] ; Cytoplasmic [Class 3]
910	PA14_51330	PA1004	nadA	19.7264	-1.4272	0.335298	-4.25651	2.07647e-05	0.00012437	NOT_CHANGE	quinolinate synthetase	Cytoplasmic [Class 3]
911	PA14_54450	PA0761	nadB	612.431	-0.488908	0.0964718	-5.06788	4.02266e-07	3.12264e-06	NOT_CHANGE	L-aspartate oxidase	Cytoplasmic [Class 3]
912	PA14_58700	PA4524	nadC	104.722	-1.10659	0.170017	-6.50868	7.58143e-11	8.44194e-10	NOT_CHANGE	nicotinate-nucleotide pyrophosphorylase	Cytoplasmic [Class 3]
913	PA14_12020	NA	nadD	354.989	-0.41194	0.140842	-2.92483	0.00344648	0.0126438	NOT_CHANGE	nicotinic acid mononucleotide adenylyltransferase	Cytoplasmic [Class 3]
914	PA14_64980	PA4920	nadE	403.641	-0.264781	0.0817559	-3.23868	0.00120085	0.00506491	NOT_CHANGE	NAD synthetase	Cytoplasmic [Class 3]
915	PA14_25195	PA3005	nagZ	666.022	-0.442875	0.103105	-4.29539	1.74383e-05	0.000106122	NOT_CHANGE	beta-hexosaminidase	Cytoplasmic [Class 3]
916	PA14_49250	PA1174	napA	37.7676	0.403397	0.271889	1.48368	0.137893	0.257334	NOT_CHANGE	nitrate reductase catalytic subunit	Periplasmic [Class 3]
917	PA14_49260	PA1173	napB	152.134	-0.454357	0.130738	-3.47533	0.000510224	0.00236801	NOT_CHANGE	cytochrome c-type protein NapB precursor	Periplasmic [Class 3]
918	PA14_49270	NA	napc	722.585	-0.176077	0.0729979	-2.41208	0.0158617	0.0459302	NOT_CHANGE	cytochrome c-type protein NapC	Cytoplasmic Membrane [Class 3]
919	PA14_49230	PA1175	napD	476.514	-0.57555	0.0877564	-6.55849	5.43547e-11	6.08815e-10	NOT_CHANGE	NapD protein of periplasmic nitrate reductase	Cytoplasmic [Class 3]
920	PA14_49210	PA1177	napE	1518.44	-0.159982	0.065745	-2.43337	0.0149589	0.0438682	NOT_CHANGE	periplasmic nitrate reductase NapE	Cytoplasmic Membrane [Class 3]
921	PA14_49220	PA1176	napF	2193.31	0.0254459	0.0674026	0.377522	0.705786	0.811789	NOT_CHANGE	ferredoxin protein NapF	Cytoplasmic [Class 3]
922	PA14_13780	PA3875	narG	295.315	0.13748	0.108122	1.27152	0.203543	0.345101	NOT_CHANGE	respiratory nitrate reductase alpha subun	Cytoplasmic Membrane [Class 3]
923	PA14_13800	PA3874	narH	136.089	0.169516	0.159679	1.0616	0.288416	0.445464	NOT_CHANGE	respiratory nitrate reductase beta subuni	Cytoplasmic Membrane [Class 3]
924	PA14_13830	PA3872	narI	168.184	-0.244821	0.14153	-1.72981	0.0836633	0.17273	NOT_CHANGE	respiratory nitrate reductase gamma chain	Cytoplasmic Membrane [Class 3]
925	PA14_13810	PA3873	narJ	368.787	0.0703336	0.0865288	0.812834	0.416313	0.573703	NOT_CHANGE	respiratory nitrate reductase delta chain	Cytoplasmic [Class 3]
926	PA14_13750	PA3877	narK1	3.17835	-1.32279	0.890049	-1.4862	0.137225	0.25634	NOT_CHANGE	nitrite extrusion protein 1	Cytoplasmic Membrane [Class 3]
927	PA14_13770	PA3876	narK2	1619.59	0.126499	0.0884682	1.42988	0.152751	0.278478	NOT_CHANGE	nitrite extrusion protein 2	Cytoplasmic Membrane [Class 3]
928	PA14_13730	PA3879	narL	6.11979	-0.873246	0.583764	-1.49589	0.134682	0.252898	NOT_CHANGE	transcriptional regulator NarL	Cytoplasmic [Class 3]
929	PA14_13740	PA3878	narX	2617.36	0.20301	0.0640397	3.17006	0.00152405	0.00624322	NOT_CHANGE	two-component sensor NarX	Cytoplasmic Membrane [Class 3]
930	PA14_41510	PA1783	nasA	268.166	-0.653651	0.0990406	-6.59983	4.11636e-11	4.62887e-10	NOT_CHANGE	nitrate transporter	Cytoplasmic Membrane [Class 3]
931	PA14_41480	PA1786	nasS	2580.93	0.407342	0.0525936	7.74508	9.5518e-15	1.40077e-13	NOT_CHANGE	hypothetical protein	Cytoplasmic Membrane [Class 3]
932	PA14_41490	PA1785	nasT	2524.55	-0.216905	0.126295	-1.71745	0.0858973	0.176446	NOT_CHANGE	hypothetical protein	Cytoplasmic [Class 3]
933	PA14_58870	PA4538	ndh	435.676	-1.09539	0.125524	-8.72655	2.62567e-18	4.55489e-17	NOT_CHANGE	NADH dehydrogenase	Cytoplasmic Membrane [Class 3]
934	PA14_14820	PA3807	ndk	23.2878	0.478306	0.299171	1.59877	0.109872	0.215131	NOT_CHANGE	nucleoside diphosphate kinase	Extracellular [Class 3]
935	PA14_55580	NA	nemO	15.0891	0.403921	0.376279	1.07346	0.283064	0.438985	NOT_CHANGE	heme oxygenase	Unknown [Class 3]
936	PA14_60860	PA4600	nfxB	537.141	0.38987	0.0926037	4.21009	2.55265e-05	0.000150826	NOT_CHANGE	transcriptional regulator NfxB	Cytoplasmic [Class 3]
937	PA14_41000	PA1820	nhaB	673.292	-0.0526198	0.07414	-0.709735	0.477868	0.628067	NOT_CHANGE	sodium/proton antiporter	Cytoplasmic Membrane [Class 3]
938	PA14_13620	PA3887	nhaP	196.19	-0.013343	0.115965	-0.115061	0.908397	0.952275	NOT_CHANGE	Na+/H+ antiporter NhaP	Cytoplasmic Membrane [Class 3]
939	PA14_41530	PA1781	nirB	207.261	-0.205947	0.111193	-1.85216	0.0640024	0.141207	NOT_CHANGE	assimilatory nitrite reductase large subunit	Cytoplasmic [Class 3]
940	PA14_06730	PA0517	nirC	144.717	-0.335076	0.121829	-2.75038	0.00595271	0.0202577	NOT_CHANGE	c-type cytochrome	Periplasmic [Class 3]
941	PA14_41540	PA1780	nirD	709.365	0.0919364	0.0778972	1.18023	0.23791	0.386222	NOT_CHANGE	assimilatory nitrite reductase small subunit	Unknown [Class 3]
942	PA14_06660	PA0510	nirE	319.613	0.0206927	0.10181	0.203248	0.838941	0.910119	NOT_CHANGE	uroporphyrin-III c-methyltransferase	Cytoplasmic [Class 3]
943	PA14_06720	PA0516	nirF	539.629	0.389532	0.0936978	4.15732	3.22002e-05	0.000186958	NOT_CHANGE	heme d1 biosynthesis protein NirF	Cytoplasmic [Class 3]
944	PA14_06690	PA0513	nirG	498.073	0.654944	0.179176	3.65531	0.000256869	0.00126984	NOT_CHANGE	transcriptional regulator	Cytoplasmic [Class 3]
945	PA14_06680	PA0512	nirH	78.0314	-0.586796	0.189832	-3.09114	0.00199389	0.00788957	NOT_CHANGE	hypothetical protein	Unknown [Class 3]
946	PA14_06670	PA0511	nirJ	1624.04	0.486537	0.0791807	6.14464	8.01454e-10	8.08559e-09	NOT_CHANGE	heme d1 biosynthesis protein NirJ	Cytoplasmic [Class 3]
947	PA14_06700	PA0514	nirL	239.438	0.22466	0.105986	2.11971	0.0340307	0.0859452	NOT_CHANGE	heme d1 biosynthesis protein NirL	Cytoplasmic [Class 3]
948	PA14_06740	PA0518	nirM	564.997	0.0238969	0.0823795	0.290083	0.771753	0.861203	NOT_CHANGE	cytochrome c-551	Periplasmic [Class 3]
949	PA14_06650	PA0509	nirN	623.934	-0.269469	0.0995758	-2.70617	0.00680643	0.0227815	NOT_CHANGE	c-type cytochrome	Unknown (This protein may have multiple localization sites) [Class 3]
950	PA14_06770	PA0520	nirQ	1401.38	-0.15028	0.0829473	-1.81176	0.0700238	0.15098	NOT_CHANGE	regulatory protein NirQ	Cytoplasmic [Class 3]
951	PA14_06750	PA0519	nirS	1210.8	0.0164607	0.0697353	0.236046	0.813397	0.891537	NOT_CHANGE	nitrite reductase	Periplasmic [Class 3]
952	PA14_06810	PA0523	norC	265.27	-0.101979	0.17995	-0.566704	0.570915	0.708971	NOT_CHANGE	nitric-oxide reductase subunit C	Cytoplasmic Membrane [Class 3]
953	PA14_20190	PA3393	nosD	1810.15	-0.00138071	0.0571851	-0.0241447	0.980737	0.989432	NOT_CHANGE	copper ABC transporter periplasmic substrate-binding protein	Periplasmic [Class 3]
954	PA14_20180	PA3394	nosF	721.391	0.37942	0.10807	3.51086	0.000446661	0.0020935	NOT_CHANGE	NosF protein	Cytoplasmic [Class 3]
955	PA14_20150	PA3396	nosL	461.209	1.00242	0.103734	9.66342	4.31241e-22	9.19012e-21	NOT_CHANGE	NosL protein	Unknown [Class 3]
956	PA14_20230	PA3391	nosR	303.802	-0.0519947	0.108404	-0.47964	0.631483	0.757407	NOT_CHANGE	regulatory protein NosR	Cytoplasmic Membrane [Class 3]
957	PA14_20170	PA3395	nosY	325.83	-0.14213	0.107302	-1.32459	0.185308	0.321563	NOT_CHANGE	NosY protein	Cytoplasmic Membrane [Class 3]
958	PA14_20200	PA3392	nosZ	498.024	0.15129	0.109786	1.37805	0.168189	0.299528	NOT_CHANGE	nitrous-oxide reductase	Periplasmic [Class 3]
959	PA14_72560	NA	np20	252.819	-0.914006	0.136172	-6.71214	1.91794e-11	2.21361e-10	NOT_CHANGE	transcriptional regulator np20	Cytoplasmic [Class 3]
960	PA14_41110	PA1811	nppA1	164.092	-0.172539	0.125717	-1.37244	0.169927	0.301963	NOT_CHANGE	ABC transporter substrate-binding protein NppA1	Periplasmic [Class 3]
961	PA14_41130	PA1810	nppA2	772.056	0.186051	0.0779219	2.38767	0.0169557	0.0484571	NOT_CHANGE	ABC transporter substrate-binding protein NppA2	Periplasmic [Class 3]
962	PA14_41140	PA1809	nppB	209.536	0.261319	0.12462	2.09693	0.0359997	0.0899993	NOT_CHANGE	peptidyl nucleoside antibiotic ABC transporter permease NppB	Cytoplasmic Membrane [Class 3]
963	PA14_41150	PA1808	nppC	7.46768	0.729521	0.55026	1.32578	0.184914	0.321172	NOT_CHANGE	peptidyl nucleoside antibiotic ABC transporter permease NppC	Cytoplasmic Membrane [Class 3]
964	PA14_41160	PA1807	nppD	196.01	0.107174	0.118429	0.904961	0.365486	0.523965	NOT_CHANGE	peptidyl nucleoside antibiotic ABC transporter ATP-binding protein NppD	Cytoplasmic Membrane [Class 3]
965	PA14_25280	PA2999	nqrA	80.0291	-0.469858	0.209277	-2.24514	0.0247589	0.0665147	NOT_CHANGE	Na(+)-translocating NADH-quinone reductase subunit A	Cytoplasmic [Class 3]
966	PA14_25305	PA2998	nqrB	303.871	-0.41747	0.123176	-3.38921	0.000700934	0.00312564	NOT_CHANGE	Na(+)-translocating NADH-quinone reductase subunit B	Cytoplasmic Membrane [Class 3]
967	PA14_25320	PA2997	nqrC	335.728	-0.615168	0.128928	-4.77139	1.82962e-06	1.29484e-05	NOT_CHANGE	Na(+)-translocating NADH-quinone reductase subunit C	Unknown [Class 3]
968	PA14_25330	PA2996	nqrD	379.305	-0.535917	0.0901428	-5.9452	2.76116e-09	2.65389e-08	NOT_CHANGE	Na(+)-translocating NADH-quinone reductase subunit D	Cytoplasmic Membrane [Class 3]
969	PA14_25340	PA2995	nqrE	540.11	-0.891347	0.0960061	-9.28428	1.62808e-20	3.17253e-19	NOT_CHANGE	Na(+)-translocating NADH-quinone reductase subunit E	Cytoplasmic Membrane [Class 3]
970	PA14_25350	PA2994	nqrF	82.873	-0.890652	0.181613	-4.90412	9.38449e-07	6.8723e-06	NOT_CHANGE	Na(+)-translocating NADH-quinone reductase subunit F	Cytoplasmic [Class 3]
971	PA14_49460	PA1156	nrdA	610.609	-0.120857	0.120046	-1.00676	0.314052	0.473791	NOT_CHANGE	ribonucleotide-diphosphate reductase subunit alpha	Cytoplasmic [Class 3]
972	PA14_49470	PA1155	nrdB	70.3171	2.76171	0.374454	7.37529	1.63985e-13	2.1649e-12	UP	ribonucleotide-diphosphate reductase subunit beta	Cytoplasmic [Class 3]
973	PA14_11380	PA4057	nrdR	28.9961	-0.806604	0.269286	-2.99534	0.00274138	0.0103644	NOT_CHANGE	transcriptional regulator NrdR	Cytoplasmic [Class 3]
974	PA14_18880	PA3495	nth	465.396	0.0846099	0.165067	0.512578	0.608247	0.741256	NOT_CHANGE	endonuclease III	Cytoplasmic [Class 3]
975	PA14_67670	PA5124	ntrB	289.133	-0.0715858	0.143224	-0.499816	0.617204	0.74737	NOT_CHANGE	two-component sensor NtrB	Cytoplasmic Membrane [Class 3]
976	PA14_67680	PA5125	ntrC	529.037	-0.168151	0.0940936	-1.78706	0.0739279	0.157299	NOT_CHANGE	two-component response regulator NtrC	Cytoplasmic [Class 3]
977	PA14_40950	PA1823	nudC	415.097	-0.196467	0.0872967	-2.25056	0.0244131	0.0658012	NOT_CHANGE	NADH pyrophosphatase	Cytoplasmic [Class 3]
978	PA14_68380	NA	nudE	3774.07	-0.285491	0.0872728	-3.27125	0.00107074	0.00456027	NOT_CHANGE	ADP-ribose diphosphatase NudE	Cytoplasmic [Class 3]
979	PA14_01760	PA0143	nuh	6.03975	0.272733	0.674302	0.404467	0.685869	0.79824	NOT_CHANGE	nonspecific ribonucleoside hydrolase	Unknown [Class 3]
980	PA14_30020	PA2637	nuoA	279.719	-0.407048	0.0996452	-4.08498	4.40814e-05	0.000250284	NOT_CHANGE	NADH dehydrogenase subunit A	Cytoplasmic Membrane [Class 3]
981	PA14_30010	PA2638	nuoB	235.771	-0.470365	0.121229	-3.87996	0.000104474	0.000555047	NOT_CHANGE	NADH dehydrogenase subunit B	Cytoplasmic Membrane [Class 3]
982	PA14_29990	PA2639	nuoD	82.2705	-0.407906	0.170861	-2.38736	0.0169699	0.0484733	NOT_CHANGE	bifunctional NADH:ubiquinone oxidoreductase subunit C/D	Cytoplasmic [Class 3]
983	PA14_29980	PA2640	nuoE	55.6264	-0.494558	0.204628	-2.41686	0.0156548	0.0454006	NOT_CHANGE	NADH dehydrogenase subunit E	Cytoplasmic [Class 3]
984	PA14_29970	PA2641	nuoF	127.593	-0.377771	0.143138	-2.63921	0.00831002	0.0268812	NOT_CHANGE	NADH dehydrogenase I subunit F	Cytoplasmic [Class 3]
985	PA14_29940	PA2642	nuoG	23.2407	-0.281994	0.363751	-0.77524	0.438198	0.593795	NOT_CHANGE	NADH dehydrogenase subunit G	Cytoplasmic [Class 3]
986	PA14_29930	PA2643	nuoH	19.2247	-0.485538	0.3604	-1.34722	0.17791	0.312546	NOT_CHANGE	NADH dehydrogenase subunit H	Cytoplasmic Membrane [Class 3]
987	PA14_29920	PA2644	nuoI	63.2102	-0.671459	0.244223	-2.74937	0.00597102	0.0203079	NOT_CHANGE	NADH dehydrogenase subunit I	Cytoplasmic [Class 3]
988	PA14_29900	PA2645	nuoJ	111.594	-1.22779	0.163302	-7.51856	5.53834e-14	7.55712e-13	NOT_CHANGE	NADH dehydrogenase subunit J	Cytoplasmic Membrane [Class 3]
989	PA14_29890	PA2646	nuoK	323.418	-0.447154	0.11982	-3.73188	0.000190053	0.000958689	NOT_CHANGE	NADH dehydrogenase subunit K	Cytoplasmic Membrane [Class 3]
990	PA14_29880	PA2647	nuoL	64.3029	0.650577	0.177252	3.67036	0.000242213	0.00120156	NOT_CHANGE	NADH dehydrogenase subunit L	Cytoplasmic Membrane [Class 3]
991	PA14_29860	PA2648	nuoM	34.0101	0.0339154	0.243108	0.139508	0.889049	0.940277	NOT_CHANGE	NADH dehydrogenase subunit M	Cytoplasmic Membrane [Class 3]
992	PA14_29850	PA2649	nuoN	145.95	0.311483	0.136084	2.2889	0.0220849	0.0602702	NOT_CHANGE	NADH dehydrogenase subunit N	Cytoplasmic Membrane [Class 3]
993	PA14_62770	PA4745	nusA	4.25951	-0.452272	0.650662	-0.695095	0.486995	0.636281	NOT_CHANGE	transcription elongation factor NusA	Cytoplasmic [Class 3]
994	PA14_11450	PA4052	nusB	147.273	0.112587	0.134443	0.837433	0.402349	0.559496	NOT_CHANGE	transcription antitermination protein NusB	Unknown [Class 3]
995	PA14_60445	NA	obgE	97.3632	1.2336	0.182568	6.75695	1.40924e-11	1.64652e-10	NOT_CHANGE	GTPase ObgE	Cytoplasmic [Class 3]
996	PA14_51440	PA0995	ogt	4975.19	0.0137948	0.0490054	0.281495	0.778331	0.866504	NOT_CHANGE	methylated-DNA--protein-cysteine methyltransferase	Cytoplasmic [Class 3]
997	PA14_27220	PA2850	ohr	163.459	0.224453	0.131999	1.70041	0.0890537	0.181719	NOT_CHANGE	organic hydroperoxide resistance protein	Cytoplasmic [Class 3]
998	PA14_63030	PA4765	omlA	1529.16	4.18608	0.271055	15.4437	8.32046e-54	5.26038e-52	UP	outer membrane lipoprotein OmlA precursor	Outer Membrane [Class 3]
999	PA14_68700	NA	ompR	5.42191	-0.843248	0.666528	-1.26513	0.205823	0.348242	NOT_CHANGE	osmolarity response regulator	Cytoplasmic [Class 3]
1000	PA14_58410	NA	opdP	83.214	0.00929439	0.181605	0.0511793	0.959183	0.977741	NOT_CHANGE	glycine-glutamate dipeptide porin OpdP	Outer Membrane [Class 3]
1001	PA14_09500	PA4208	opmD	2886.29	0.208197	0.071286	2.92058	0.00349375	0.0127514	NOT_CHANGE	outer membrane protein	Outer Membrane [Class 3]
1002	PA14_23030	PA3186	oprB	14.1109	0.424527	0.372596	1.13938	0.254547	0.405347	NOT_CHANGE	glucose/carbohydrate outer membrane porin OprB precursor	Outer Membrane [Class 3]
1003	PA14_15070	PA3790	oprC	237.398	-0.21849	0.114762	-1.90385	0.0569294	0.12952	NOT_CHANGE	outer membrane copper receptor OprC	Outer Membrane [Class 3]
1004	PA14_51880	PA0958	oprD	672.925	0.434782	0.0712434	6.10276	1.04251e-09	1.04435e-08	NOT_CHANGE	basic amino acid, basic peptide and imipenem outer membrane porin OprD precursor	Outer Membrane [Class 3]
1005	PA14_03800	PA0291	oprE	637.319	-0.104838	0.0849049	-1.23476	0.216918	0.361535	NOT_CHANGE	anaerobically-induced outer membrane porin OprE precursor	Outer Membrane [Class 3]
1006	PA14_41570	PA1777	oprF	376.545	0.248887	0.0963154	2.58408	0.00976386	0.0307281	NOT_CHANGE	major porin and structural outer membrane porin OprF precursor	Outer Membrane [Class 3]
1007	PA14_11270	PA4067	oprG	983.345	0.0267876	0.0682442	0.392526	0.69467	0.805353	NOT_CHANGE	outer membrane protein OprG precursor	Outer Membrane [Class 3]
1008	PA14_49200	PA1178	oprH	290.461	0.275957	0.0971884	2.8394	0.00451983	0.0159244	NOT_CHANGE	PhoP/Q and low Mg2+ inducible outer membrane prote	Outer Membrane [Class 3]
1009	PA14_60820	PA4597	oprJ	1036.3	-0.184989	0.0856119	-2.16078	0.0307122	0.0789305	NOT_CHANGE	outer membrane protein OprJ	Outer Membrane [Class 3]
1010	PA14_51710	PA0973	oprL	279.56	0.810854	0.177178	4.57649	4.72852e-06	3.17279e-05	NOT_CHANGE	peptidoglycan associated lipoprotein OprL precursor	Outer Membrane [Class 3]
1011	PA14_05550	PA0427	oprM	41.1446	0.314507	0.215141	1.46186	0.143779	0.266657	NOT_CHANGE	major intrinsic multiple antibiotic resistance efflux outer membrane protein OprM precursor	Outer Membrane [Class 3]
1012	PA14_32380	PA2495	oprN	325.961	-0.204208	0.125392	-1.62856	0.103405	0.205654	NOT_CHANGE	multidrug efflux outer membrane protein OprN precursor	Outer Membrane [Class 3]
1013	PA14_21610	PA3280	oprO	2030.17	-0.0604103	0.054836	-1.10165	0.270612	0.425119	NOT_CHANGE	pyrophosphate-specific outer membrane porin OprO precursor	Outer Membrane [Class 3]
1014	PA14_21620	PA3279	oprP	610.913	-0.142891	0.0942553	-1.516	0.12952	0.245984	NOT_CHANGE	phosphate-specific outer membrane porin OprP precursor	Outer Membrane [Class 3]
1015	PA14_23390	NA	orfE	210.041	-0.0836816	0.129703	-0.645179	0.518811	0.664274	NOT_CHANGE	polysaccharide biosynthesis protein	Cytoplasmic Membrane [Class 3]
1016	PA14_23380	NA	orfH	605.174	-0.202468	0.114157	-1.77359	0.0761316	0.161157	NOT_CHANGE	UDP-N-acetyl-D-mannosaminuronate dehydrogenase	Cytoplasmic [Class 3]
1017	PA14_23410	NA	orfJ	1465.22	-0.101256	0.0841346	-1.2035	0.228781	0.375473	NOT_CHANGE	glycosyl transferase family protein	Unknown [Class 3]
1018	PA14_23370	NA	orfK	38.9795	0.150772	0.232912	0.647332	0.517417	0.663961	NOT_CHANGE	UDP-N-acetylglucosamine 2-epimerase	Cytoplasmic [Class 3]
1019	PA14_23440	NA	orfL	1200.45	-0.437724	0.104195	-4.20101	2.65722e-05	0.000156517	NOT_CHANGE	group 1 glycosyl transferase	Cytoplasmic [Class 3]
1020	PA14_23450	NA	orfM	1199.12	-0.165346	0.0623768	-2.65076	0.00803104	0.0260825	NOT_CHANGE	NAD dependent epimerase/dehydratase	Cytoplasmic [Class 3]
1021	PA14_23460	NA	orfN	465.724	-0.116568	0.0867701	-1.34341	0.179139	0.314042	NOT_CHANGE	group 4 glycosyl transferase	Cytoplasmic Membrane [Class 3]
1022	PA14_65410	PA4951	orn	144.016	0.516042	0.266075	1.93946	0.0524455	0.121356	NOT_CHANGE	oligoribonuclease	Cytoplasmic [Class 3]
1023	PA14_53520	PA0831	oruR	768.512	0.156289	0.113977	1.37123	0.170304	0.302444	NOT_CHANGE	transcriptional regulator OruR	Cytoplasmic [Class 3]
1024	PA14_00710	PA0059	osmC	1351.44	0.229841	0.0576496	3.98686	6.69542e-05	0.000368799	NOT_CHANGE	osmotically inducible protein OsmC	Cytoplasmic [Class 3]
1025	PA14_64480	PA4876	osmE	152.776	-0.380071	0.126559	-3.0031	0.00267246	0.0101511	NOT_CHANGE	DNA-binding transcriptional activator OsmE	Unknown [Class 3]
1026	PA14_07770	NA	ostA	696.765	0.583574	0.103204	5.65456	1.56245e-08	1.40226e-07	NOT_CHANGE	organic solvent tolerance protein OstA	Outer Membrane [Class 3]
1027	PA14_00060	NA	PA14_00060	457.275	-0.132759	0.0912083	-1.45556	0.145516	0.269175	NOT_CHANGE	acyltransferase	Cytoplasmic Membrane [Class 3]
1028	PA14_00070	NA	PA14_00070	171.816	-0.459521	0.118681	-3.87192	0.000107983	0.000571557	NOT_CHANGE	D,D-heptose 1,7-bisphosphate phosphatase	Cytoplasmic [Class 3]
1029	PA14_00080	NA	PA14_00080	331.659	0.12484	0.136978	0.911387	0.362091	0.520804	NOT_CHANGE	hypothetical protein	Unknown (This protein may have multiple localization sites) [Class 3]
1030	PA14_00130	NA	PA14_00130	2017.46	1.32104	0.109938	12.0163	2.91853e-33	1.00645e-31	NOT_CHANGE	hypothetical protein	Unknown [Class 3]
1031	PA14_00140	NA	PA14_00140	1249.17	-0.228673	0.0778471	-2.93746	0.00330917	0.0122188	NOT_CHANGE	hypothetical protein	Cytoplasmic Membrane [Class 3]
1032	PA14_00150	NA	PA14_00150	1227.93	0.596065	0.105854	5.63098	1.79184e-08	1.59806e-07	NOT_CHANGE	hypothetical protein	Unknown [Class 3]
1033	PA14_00160	NA	PA14_00160	559.186	2.23501	0.57573	3.88205	0.000103581	0.000550819	UP	hypothetical protein	Unknown [Class 3]
1034	PA14_00180	NA	PA14_00180	1069.64	-0.20061	0.067043	-2.99225	0.00276928	0.0104629	NOT_CHANGE	tRNA and rRNA cytosine-C5-methylases	Cytoplasmic [Class 3]
1035	PA14_00210	NA	PA14_00210	101.015	0.280937	0.15128	1.85707	0.0633011	0.140258	NOT_CHANGE	lysin domain-containing protein	Unknown [Class 3]
1036	PA14_00230	NA	PA14_00230	382.373	0.100548	0.116495	0.863112	0.388076	0.54725	NOT_CHANGE	Rossmann fold nucleotide-binding protein	Unknown (This protein may have multiple localization sites) [Class 3]
1037	PA14_00240	NA	PA14_00240	114.474	0.17082	0.169619	1.00708	0.313895	0.473757	NOT_CHANGE	hypothetical protein	Cytoplasmic [Class 3]
1038	PA14_00310	NA	PA14_00310	3369.19	-0.44105	0.118809	-3.71225	0.000205427	0.00102894	NOT_CHANGE	peptidyl-prolyl isomerase	Unknown (This protein may have multiple localization sites) [Class 3]
1039	PA14_00320	NA	PA14_00320	1195.64	-0.48749	0.0904328	-5.39063	7.02101e-08	5.9097e-07	NOT_CHANGE	hypothetical protein	Unknown [Class 3]
1040	PA14_00340	NA	PA14_00340	17.3808	-0.550567	0.348788	-1.57852	0.114447	0.222102	NOT_CHANGE	sulfate transporter	Cytoplasmic Membrane [Class 3]
1041	PA14_00360	NA	PA14_00360	893.67	-0.42486	0.0752607	-5.64518	1.65013e-08	1.47629e-07	NOT_CHANGE	hypothetical protein	Unknown [Class 3]
1042	PA14_00400	NA	PA14_00400	260.618	-0.148404	0.0993472	-1.49379	0.13523	0.253695	NOT_CHANGE	LysR family transcriptional regulator	Cytoplasmic [Class 3]
1043	PA14_00410	NA	PA14_00410	166.095	-0.0298888	0.126399	-0.236464	0.813072	0.891403	NOT_CHANGE	dioxygenase	Cytoplasmic [Class 3]
1044	PA14_00420	NA	PA14_00420	3.16849	0.652694	0.868346	0.751652	0.452261	0.607068	NOT_CHANGE	histidine phosphotransfer domain-containing protein	Unknown [Class 3]
1045	PA14_00430	NA	PA14_00430	705.322	-0.0619829	0.0726916	-0.852683	0.393835	0.552904	NOT_CHANGE	two-component response regulator	Cytoplasmic [Class 3]
1046	PA14_00470	NA	PA14_00470	4745.43	-0.13851	0.260297	-0.532122	0.594641	0.727793	NOT_CHANGE	hypothetical protein	Unknown [Class 3]
1047	PA14_00480	NA	PA14_00480	975.593	-0.320174	0.0758076	-4.2235	2.40534e-05	0.000142566	NOT_CHANGE	hypothetical protein	Unknown [Class 3]
1048	PA14_00490	NA	PA14_00490	713.484	1.02404	0.0756962	13.5282	1.06552e-41	4.88938e-40	NOT_CHANGE	hemolysin activation/secretion protein	Outer Membrane [Class 3]
1049	PA14_00510	NA	PA14_00510	2600.57	-0.71412	0.0954527	-7.4814	7.35364e-14	9.9862e-13	NOT_CHANGE	hemagglutinin	Outer Membrane [Class 3]
1050	PA14_00520	NA	PA14_00520	4949.4	0.0216632	0.060151	0.360147	0.718737	0.821537	NOT_CHANGE	hypothetical protein	Unknown [Class 3]
1051	PA14_00530	NA	PA14_00530	131.955	0.178758	0.153283	1.16619	0.243536	0.392778	NOT_CHANGE	hypothetical protein	Unknown [Class 3]
1052	PA14_00550	NA	PA14_00550	1007.34	-0.0126431	0.0802945	-0.15746	0.874883	0.931179	NOT_CHANGE	hypothetical protein	Cytoplasmic Membrane [Class 3]
1053	PA14_00570	NA	PA14_00570	1177.16	0.117889	0.0903462	1.30486	0.191942	0.331055	NOT_CHANGE	lipoprotein	Unknown [Class 3]
1054	PA14_00580	NA	PA14_00580	1450.1	-0.199823	0.0755855	-2.64367	0.00820116	0.0265744	NOT_CHANGE	lipoprotein	Unknown [Class 3]
1055	PA14_00590	NA	PA14_00590	1102.32	-0.19229	0.0615772	-3.12275	0.00179173	0.00717259	NOT_CHANGE	lipoprotein	Unknown [Class 3]
1056	PA14_00600	NA	PA14_00600	1964.35	-0.00389301	0.100058	-0.0389076	0.968964	0.982432	NOT_CHANGE	transcriptional regulator	Unknown [Class 3]
1057	PA14_00620	NA	PA14_00620	161.562	0.497405	0.132628	3.75036	0.000176578	0.000899488	NOT_CHANGE	hypothetical protein	Unknown [Class 3]
1058	PA14_00630	NA	PA14_00630	2600.87	0.152687	0.0792932	1.9256	0.054154	0.124399	NOT_CHANGE	hypothetical protein	Unknown [Class 3]
1059	PA14_00650	NA	PA14_00650	628.997	0.0860473	0.0696876	1.23476	0.216921	0.361535	NOT_CHANGE	hypothetical protein	Unknown [Class 3]
1060	PA14_00660	NA	PA14_00660	983.937	1.15095	0.0968592	11.8827	1.4553e-32	4.78649e-31	NOT_CHANGE	RNA 2'-phosphotransferase-like protein	Unknown [Class 3]
1061	PA14_00670	NA	PA14_00670	1185.47	0.364389	0.0604758	6.02537	1.68721e-09	1.65807e-08	NOT_CHANGE	hypothetical protein	Cytoplasmic [Class 3]
1062	PA14_00680	NA	PA14_00680	1316.64	0.18112	0.0716873	2.52652	0.0115198	0.0354696	NOT_CHANGE	LysR family transcriptional regulator	Cytoplasmic [Class 3]
1063	PA14_00690	NA	PA14_00690	196.073	0.105475	0.11201	0.941656	0.346369	0.504826	NOT_CHANGE	hypothetical protein	Unknown [Class 3]
1064	PA14_00700	NA	PA14_00700	701.917	-0.126155	0.160745	-0.784815	0.432562	0.589016	NOT_CHANGE	hypothetical protein	Cytoplasmic [Class 3]
1065	PA14_00720	NA	PA14_00720	458.536	-0.335854	0.32212	-1.04264	0.297117	0.455564	NOT_CHANGE	hypothetical protein	Unknown [Class 3]
1066	PA14_00730	NA	PA14_00730	1341.95	-0.0611888	0.0691714	-0.884596	0.376375	0.535661	NOT_CHANGE	hypothetical protein	Unknown [Class 3]
1067	PA14_00740	NA	PA14_00740	972.524	0.263937	0.0677765	3.89423	9.85129e-05	0.000525833	NOT_CHANGE	lipoprotein	Unknown [Class 3]
1068	PA14_00750	NA	PA14_00750	852.237	-0.491814	0.0775478	-6.34207	2.26693e-10	2.41552e-09	NOT_CHANGE	hypothetical protein	Unknown [Class 3]
1069	PA14_00760	NA	PA14_00760	111.892	0.116002	0.142349	0.81491	0.415124	0.572342	NOT_CHANGE	hypothetical protein	Cytoplasmic Membrane [Class 3]
1070	PA14_00770	NA	PA14_00770	896.314	0.0617309	0.163372	0.377854	0.705539	0.81167	NOT_CHANGE	hypothetical protein	Cytoplasmic [Class 3]
1071	PA14_00780	NA	PA14_00780	817.687	0.162986	0.102533	1.58959	0.111927	0.218329	NOT_CHANGE	hypothetical protein	Cytoplasmic [Class 3]
1072	PA14_00800	NA	PA14_00800	88.6444	0.0116155	0.177093	0.0655901	0.947704	0.97161	NOT_CHANGE	hypothetical protein	Unknown [Class 3]
1073	PA14_00810	NA	PA14_00810	7871.51	-0.203932	0.0632258	-3.22545	0.00125774	0.00529329	NOT_CHANGE	DNA repair photolyase	Cytoplasmic [Class 3]
1074	PA14_00970	NA	PA14_00970	50.6628	-0.0851533	0.211086	-0.403405	0.68665	0.798659	NOT_CHANGE	hypothetical protein	Cytoplasmic [Class 3]
1075	PA14_01130	NA	PA14_01130	549.431	0.190013	0.0905722	2.09791	0.0359127	0.0898608	NOT_CHANGE	hypothetical protein	Cytoplasmic [Class 3]
1076	PA14_01160	NA	PA14_01160	9735.01	0.479115	0.0958657	4.99778	5.79952e-07	4.38237e-06	NOT_CHANGE	hypothetical protein	Cytoplasmic [Class 3]
1077	PA14_01170	NA	PA14_01170	1491.18	0.141501	0.0760498	1.86064	0.0627948	0.139462	NOT_CHANGE	hypothetical protein	Unknown [Class 3]
1078	PA14_01180	NA	PA14_01180	100.094	-0.222545	0.161131	-1.38114	0.167236	0.298456	NOT_CHANGE	hypothetical protein	Cytoplasmic [Class 3]
1079	PA14_01190	NA	PA14_01190	706.676	-0.205491	0.0661954	-3.10431	0.00190724	0.00757834	NOT_CHANGE	3-oxoacyl-ACP synthase	Cytoplasmic [Class 3]
1080	PA14_01200	NA	PA14_01200	315.435	-0.265466	0.105027	-2.5276	0.0114844	0.0353796	NOT_CHANGE	hypothetical protein	Unknown [Class 3]
1081	PA14_01220	NA	PA14_01220	3240.57	-0.0632686	0.0454912	-1.39079	0.16429	0.294707	NOT_CHANGE	hypothetical protein	Unknown [Class 3]
1082	PA14_01230	NA	PA14_01230	261.183	-0.429804	0.146965	-2.92453	0.00344973	0.0126475	NOT_CHANGE	hypothetical protein	Cytoplasmic Membrane [Class 3]
1083	PA14_01240	NA	PA14_01240	572.792	-0.273525	0.0924264	-2.95938	0.0030826	0.0115243	NOT_CHANGE	carbonic anhydrase	Cytoplasmic [Class 3]
1084	PA14_01250	NA	PA14_01250	215.269	-0.0859623	0.117526	-0.731432	0.464515	0.618122	NOT_CHANGE	sulfate transporter	Cytoplasmic Membrane [Class 3]
1085	PA14_01270	NA	PA14_01270	334.378	0.0893887	0.0882889	1.01246	0.31132	0.470994	NOT_CHANGE	hypothetical protein	Cytoplasmic [Class 3]
1086	PA14_01310	NA	PA14_01310	602.142	-0.398663	0.0909106	-4.38522	1.15867e-05	7.26084e-05	NOT_CHANGE	cytochrome C oxidase assembly protein	Unknown [Class 3]
1087	PA14_01330	NA	PA14_01330	1264.66	-0.245768	0.097141	-2.53001	0.0114058	0.0351933	NOT_CHANGE	hypothetical protein	Cytoplasmic Membrane [Class 3]
1088	PA14_01340	NA	PA14_01340	1290.24	-0.154891	0.0830607	-1.86479	0.0622106	0.138489	NOT_CHANGE	hypothetical protein	Outer Membrane [Class 3]
1089	PA14_01350	NA	PA14_01350	514.212	0.228282	0.0953645	2.39378	0.0166756	0.0478487	NOT_CHANGE	hypothetical protein	Unknown [Class 3]
1090	PA14_01360	NA	PA14_01360	1262.04	0.221796	0.0787105	2.81787	0.00483437	0.0168862	NOT_CHANGE	hypothetical protein	Cytoplasmic Membrane [Class 3]
1091	PA14_01380	NA	PA14_01380	1193.26	-0.121286	0.0869471	-1.39494	0.163035	0.29301	NOT_CHANGE	protoheme IX farnesyltransferase	Cytoplasmic Membrane [Class 3]
1092	PA14_01390	NA	PA14_01390	737.156	-0.27785	0.0806742	-3.4441	0.000572959	0.00261858	NOT_CHANGE	hypothetical protein	Cytoplasmic Membrane [Class 3]
1093	PA14_01400	NA	PA14_01400	532.142	-0.161822	0.0867503	-1.86538	0.0621289	0.138459	NOT_CHANGE	hypothetical protein	Cytoplasmic [Class 3]
1094	PA14_01410	NA	PA14_01410	574.155	-0.206421	0.113683	-1.81575	0.0694081	0.150107	NOT_CHANGE	hypothetical protein	Cytoplasmic [Class 3]
1095	PA14_01430	NA	PA14_01430	2030.62	0.0579614	0.0767472	0.755225	0.450114	0.605043	NOT_CHANGE	short chain dehydrogenase	Cytoplasmic [Class 3]
1096	PA14_01440	NA	PA14_01440	1716.48	-0.0173624	0.0718353	-0.241698	0.809014	0.888152	NOT_CHANGE	hypothetical protein	Unknown [Class 3]
1097	PA14_01460	NA	PA14_01460	797.192	-0.00565327	0.0842455	-0.0671047	0.946498	0.97103	NOT_CHANGE	C4-dicarboxylate transporter DctA	Cytoplasmic Membrane [Class 3]
1098	PA14_01470	NA	PA14_01470	2006.92	-0.264241	0.0841849	-3.13882	0.00169632	0.00684059	NOT_CHANGE	transcriptional regulator	Cytoplasmic [Class 3]
1099	PA14_01480	NA	PA14_01480	582.452	0.110985	0.169297	0.655564	0.512105	0.659538	NOT_CHANGE	hypothetical protein	Cytoplasmic [Class 3]
1100	PA14_01490	NA	PA14_01490	671.937	0.130091	0.0748811	1.7373	0.0823351	0.170736	NOT_CHANGE	hemolysin	Extracellular [Class 3]
1101	PA14_01500	NA	PA14_01500	1708.78	-0.0649066	0.0590149	-1.09983	0.271405	0.426129	NOT_CHANGE	transcriptional regulator	Unknown (This protein may have multiple localization sites) [Class 3]
1102	PA14_01510	NA	PA14_01510	2626.67	-0.0418254	0.0779898	-0.536293	0.591756	0.725949	NOT_CHANGE	hypothetical protein	Unknown [Class 3]
1103	PA14_01520	NA	PA14_01520	332.68	-0.085437	0.0956764	-0.892979	0.371869	0.530708	NOT_CHANGE	hypothetical protein	Unknown [Class 3]
1104	PA14_01540	NA	PA14_01540	1078.7	-0.332748	0.0727225	-4.57559	4.74881e-06	3.18265e-05	NOT_CHANGE	hypothetical protein	Periplasmic [Class 3]
1105	PA14_01550	NA	PA14_01550	138.117	-1.64687	0.140663	-11.7079	1.16118e-31	3.6303e-30	NOT_CHANGE	lipoprotein	Unknown [Class 3]
1106	PA14_01600	NA	PA14_01600	296.823	1.00192	0.114989	8.71319	2.95445e-18	5.10967e-17	NOT_CHANGE	aldehyde dehydrogenase	Cytoplasmic [Class 3]
1107	PA14_01610	NA	PA14_01610	126.586	0.0338953	0.136705	0.247946	0.804176	0.884205	NOT_CHANGE	hypothetical protein	Unknown [Class 3]
1108	PA14_01640	NA	PA14_01640	43.9688	0.738718	0.241817	3.05487	0.00225158	0.008751	NOT_CHANGE	LysR family transcriptional regulator	Cytoplasmic [Class 3]
1109	PA14_01660	NA	PA14_01660	56.1947	-0.0122613	0.183156	-0.0669445	0.946626	0.97103	NOT_CHANGE	guanine deaminase	Cytoplasmic [Class 3]
1110	PA14_01670	NA	PA14_01670	150.173	-0.172674	0.131079	-1.31732	0.187731	0.325136	NOT_CHANGE	ABC transporter ATP-binding protein	Cytoplasmic Membrane [Class 3]
1111	PA14_01680	NA	PA14_01680	655.612	0.173304	0.082105	2.11076	0.0347933	0.0874987	NOT_CHANGE	ABC transporter permease	Cytoplasmic Membrane [Class 3]
1112	PA14_01690	NA	PA14_01690	622.024	-0.102119	0.112119	-0.910807	0.362397	0.52098	NOT_CHANGE	ABC transporter permease	Cytoplasmic Membrane [Class 3]
1113	PA14_01730	NA	PA14_01730	736.379	-0.0725877	0.0775407	-0.936123	0.34921	0.507277	NOT_CHANGE	hypothetical protein	Cytoplasmic [Class 3]
1114	PA14_01750	NA	PA14_01750	561.717	-0.172513	0.157028	-1.09861	0.271937	0.42673	NOT_CHANGE	hydroxydechloroatrazine ethylaminohydrolase	Cytoplasmic [Class 3]
1115	PA14_01770	NA	PA14_01770	11664.8	-0.229041	0.0495408	-4.62327	3.77733e-06	2.5648e-05	NOT_CHANGE	nucleoside-binding outer membrane protein	Outer Membrane [Class 3]
1116	PA14_01780	NA	PA14_01780	266.575	0.0803622	0.102762	0.782024	0.4342	0.590243	NOT_CHANGE	nucleoside 2-deoxyribosyltransferase	Unknown [Class 3]
1117	PA14_01790	NA	PA14_01790	447.478	0.173288	0.0819047	2.11573	0.034368	0.0866434	NOT_CHANGE	nucleoside 2-deoxyribosyltransferase	Cytoplasmic [Class 3]
1118	PA14_01800	NA	PA14_01800	550.888	0.264023	0.0913425	2.89047	0.00384662	0.0138791	NOT_CHANGE	hypothetical protein	Unknown [Class 3]
1119	PA14_01810	NA	PA14_01810	1640.39	0.0842673	0.0666769	1.26381	0.206297	0.348627	NOT_CHANGE	oxidoreductase	Cytoplasmic [Class 3]
1120	PA14_01830	NA	PA14_01830	693.713	0.0542843	0.0757022	0.717076	0.473327	0.625315	NOT_CHANGE	adenosine deaminase	Cytoplasmic [Class 3]
1121	PA14_01840	NA	PA14_01840	532.974	-0.619735	0.106999	-5.79196	6.95694e-09	6.38467e-08	NOT_CHANGE	RNA polymerase ECF-subfamily sigma-70 factor	Cytoplasmic [Class 3]
1122	PA14_01860	NA	PA14_01860	928.833	-0.19471	0.0798261	-2.43918	0.0147206	0.0433093	NOT_CHANGE	transmembrane sensor	Periplasmic [Class 3]
1123	PA14_01870	NA	PA14_01870	638.786	0.476189	0.0942719	5.05122	4.38986e-07	3.37089e-06	NOT_CHANGE	TonB-dependent receptor	Outer Membrane [Class 3]
1124	PA14_01940	NA	PA14_01940	326.537	0.235282	0.105279	2.23485	0.0254275	0.0678305	NOT_CHANGE	RND efflux membrane fusion protein	Unknown (This protein may have multiple localization sites) [Class 3]
1125	PA14_01960	NA	PA14_01960	203.79	0.190143	0.124278	1.52998	0.126021	0.240462	NOT_CHANGE	RND efflux membrane fusion protein	Cytoplasmic Membrane [Class 3]
1126	PA14_01970	NA	PA14_01970	512.289	-0.0115826	0.0863301	-0.134166	0.893271	0.942465	NOT_CHANGE	RND efflux transporter	Cytoplasmic Membrane [Class 3]
1127	PA14_01980	NA	PA14_01980	1529.13	-0.777395	0.0878105	-8.8531	8.51242e-19	1.51836e-17	NOT_CHANGE	LysR family transcriptional regulator	Cytoplasmic [Class 3]
1128	PA14_01990	NA	PA14_01990	288.907	0.0244447	0.109963	0.2223	0.82408	0.898968	NOT_CHANGE	hypothetical protein	Unknown [Class 3]
1129	PA14_02010	NA	PA14_02010	1686.37	0.0682543	0.0652233	1.04647	0.295344	0.453455	NOT_CHANGE	hypothetical protein	Unknown [Class 3]
1130	PA14_02020	NA	PA14_02020	787.453	-0.112954	0.0933727	-1.20971	0.226389	0.372473	NOT_CHANGE	outer membrane porin	Outer Membrane [Class 3]
1131	PA14_02030	NA	PA14_02030	681.348	-0.0407359	0.0726733	-0.560535	0.575115	0.712942	NOT_CHANGE	AraC family transcriptional regulator	Cytoplasmic [Class 3]
1132	PA14_02060	NA	PA14_02060	140.383	-0.168235	0.144769	-1.16209	0.245197	0.394339	NOT_CHANGE	hypothetical protein	Outer Membrane [Class 3]
1133	PA14_02070	NA	PA14_02070	1935.92	0.313807	0.0778422	4.03132	5.54634e-05	0.000309399	NOT_CHANGE	transporter	Cytoplasmic Membrane [Class 3]
1134	PA14_02090	NA	PA14_02090	1077.82	0.0208773	0.0653552	0.319443	0.74939	0.843528	NOT_CHANGE	TetR family transcriptional regulator	Cytoplasmic [Class 3]
1135	PA14_02100	NA	PA14_02100	1694.28	0.347833	0.0618456	5.62422	1.86343e-08	1.65671e-07	NOT_CHANGE	hypothetical protein	Cytoplasmic [Class 3]
1136	PA14_02110	NA	PA14_02110	1.20023	1.12512	1.47595	0.762302	0.44588	0.600709	NOT_CHANGE	diguanylate cyclase	Cytoplasmic [Class 3]
1137	PA14_02130	NA	PA14_02130	527.869	-0.129763	0.109581	-1.18418	0.236342	0.384415	NOT_CHANGE	hypothetical protein	Cytoplasmic [Class 3]
1138	PA14_02140	NA	PA14_02140	1474.26	-0.112137	0.078785	-1.42333	0.154641	0.281121	NOT_CHANGE	hypothetical protein	Cytoplasmic [Class 3]
1139	PA14_02150	NA	PA14_02150	842.724	-0.0199506	0.0759815	-0.262572	0.79288	0.876698	NOT_CHANGE	hypothetical protein	Unknown (This protein may have multiple localization sites) [Class 3]
1140	PA14_02190	NA	PA14_02190	704.507	-0.391071	0.140122	-2.79094	0.0052556	0.0181459	NOT_CHANGE	hypothetical protein	Cytoplasmic [Class 3]
1141	PA14_02200	NA	PA14_02200	1712.46	-0.0122745	0.0672578	-0.182499	0.855191	0.918467	NOT_CHANGE	chemotaxis protein methyltransferase	Cytoplasmic [Class 3]
1142	PA14_02220	NA	PA14_02220	278.193	-0.267492	0.108866	-2.45708	0.0140073	0.0414681	NOT_CHANGE	chemotaxis transducer	Cytoplasmic Membrane [Class 3]
1143	PA14_02260	NA	PA14_02260	26.3178	0.281768	0.286532	0.983375	0.325423	0.484854	NOT_CHANGE	two-component response regulator	Cytoplasmic [Class 3]
1144	PA14_02270	NA	PA14_02270	339.611	-0.00308313	0.0931589	-0.0330954	0.973599	0.985024	NOT_CHANGE	chemotaxis transducer	Cytoplasmic Membrane [Class 3]
1145	PA14_02290	NA	PA14_02290	246.519	0.232651	0.0997331	2.33274	0.0196619	0.0545473	NOT_CHANGE	LysR family transcriptional regulator	Cytoplasmic [Class 3]
1146	PA14_02330	NA	PA14_02330	1546.97	0.361165	0.0572487	6.3087	2.81383e-10	2.97596e-09	NOT_CHANGE	ABC transporter ATP-binding protein	Cytoplasmic Membrane [Class 3]
1147	PA14_02340	NA	PA14_02340	94.496	1.10456	0.160888	6.86542	6.62962e-12	7.92491e-11	NOT_CHANGE	ABC transporter permease	Cytoplasmic Membrane [Class 3]
1148	PA14_02360	NA	PA14_02360	531.158	-0.0202287	0.100571	-0.201139	0.84059	0.911387	NOT_CHANGE	ABC transporter substrate-binding protein	Unknown [Class 3]
1149	PA14_02370	NA	PA14_02370	351.285	0.0643651	0.115217	0.558642	0.576406	0.713765	NOT_CHANGE	porin	Outer Membrane [Class 3]
1150	PA14_02380	NA	PA14_02380	668.865	-0.00282954	0.0997966	-0.028353	0.977381	0.987621	NOT_CHANGE	acid phosphatase	Periplasmic [Class 3]
1151	PA14_02390	NA	PA14_02390	78.865	0.0163863	0.159546	0.102706	0.918196	0.958279	NOT_CHANGE	transcriptional regulator	Cytoplasmic [Class 3]
1152	PA14_02410	NA	PA14_02410	970.862	-0.0522941	0.071712	-0.729223	0.465865	0.619195	NOT_CHANGE	TonB-dependent receptor	Outer Membrane [Class 3]
1153	PA14_02420	NA	PA14_02420	572.664	-0.301629	0.116842	-2.58151	0.00983696	0.0308727	NOT_CHANGE	hypothetical protein	Cytoplasmic [Class 3]
1154	PA14_02450	NA	PA14_02450	1762.7	-0.163687	0.0544268	-3.00747	0.00263428	0.0100313	NOT_CHANGE	NAD(P) transhydrogenase subunit alpha part 1	Cytoplasmic Membrane [Class 3]
1155	PA14_02460	NA	PA14_02460	4126.11	0.878251	0.166291	5.2814	1.28202e-07	1.04359e-06	NOT_CHANGE	NAD(P) transhydrogenase subunit alpha part 2	Cytoplasmic Membrane [Class 3]
1156	PA14_02520	NA	PA14_02520	211.157	-0.0327428	0.170602	-0.191925	0.847801	0.9145	NOT_CHANGE	hypothetical protein	Unknown [Class 3]
1157	PA14_02530	NA	PA14_02530	30.0183	0.107338	0.255019	0.420902	0.673827	0.79102	NOT_CHANGE	hypothetical protein	Unknown [Class 3]
1158	PA14_02560	NA	PA14_02560	2609.64	-0.135837	0.0563452	-2.41079	0.0159179	0.0460229	NOT_CHANGE	triphosphoribosyl-dephospho-CoA synthase	Unknown [Class 3]
1159	PA14_02610	NA	PA14_02610	445.353	-0.203998	0.101456	-2.0107	0.0443576	0.106004	NOT_CHANGE	phosphoribosyl-dephospho-CoA transferase	Cytoplasmic [Class 3]
1160	PA14_02620	NA	PA14_02620	120.569	-0.0740708	0.166665	-0.444428	0.656733	0.777928	NOT_CHANGE	epsilon subunit of malonate decarboxylase	Cytoplasmic [Class 3]
1161	PA14_02630	NA	PA14_02630	432.538	0.16744	0.0951545	1.75966	0.0784653	0.164809	NOT_CHANGE	malonate carrier protein	Cytoplasmic Membrane [Class 3]
1162	PA14_02640	NA	PA14_02640	551.071	0.174688	0.107651	1.62273	0.104647	0.207179	NOT_CHANGE	malonate transporter subunit MadM	Cytoplasmic Membrane [Class 3]
1163	PA14_02650	NA	PA14_02650	78.1177	0.140501	0.170691	0.823133	0.410432	0.567799	NOT_CHANGE	malonate utilization transcriptional regulator	Cytoplasmic [Class 3]
1164	PA14_02660	NA	PA14_02660	939.653	-0.00805808	0.0799645	-0.100771	0.919732	0.959509	NOT_CHANGE	LysR family transcriptional regulator	Cytoplasmic [Class 3]
1165	PA14_02680	NA	PA14_02680	218.152	0.305216	0.124142	2.4586	0.013948	0.0413356	NOT_CHANGE	aldehyde dehydrogenase	Cytoplasmic [Class 3]
1166	PA14_02690	NA	PA14_02690	500.479	-0.145292	0.0882691	-1.64601	0.0997615	0.199663	NOT_CHANGE	amino acid permease	Cytoplasmic Membrane [Class 3]
1167	PA14_02700	NA	PA14_02700	250.585	-0.147143	0.0980818	-1.5002	0.133562	0.251562	NOT_CHANGE	aminotransferase	Cytoplasmic [Class 3]
1168	PA14_02720	NA	PA14_02720	1999.33	-0.105955	0.0611818	-1.73181	0.0833071	0.172307	NOT_CHANGE	hypothetical protein	Periplasmic [Class 3]
1169	PA14_02730	NA	PA14_02730	715.451	0.0899494	0.0919322	0.978432	0.327861	0.486955	NOT_CHANGE	dihydrodipicolinate synthetase	Cytoplasmic [Class 3]
1170	PA14_02740	NA	PA14_02740	179.145	-0.419935	0.170231	-2.46686	0.0136305	0.0405636	NOT_CHANGE	class II aldolase/adducin domain-containing protein	Cytoplasmic [Class 3]
1171	PA14_02750	NA	PA14_02750	2752.9	0.249424	0.0482209	5.17252	2.3096e-07	1.83286e-06	NOT_CHANGE	transcriptional regulator	Cytoplasmic [Class 3]
1172	PA14_02760	NA	PA14_02760	859.444	-0.582877	0.0631536	-9.22951	2.71873e-20	5.22621e-19	NOT_CHANGE	CoA transferase, subunit A	Cytoplasmic [Class 3]
1173	PA14_02770	NA	PA14_02770	596.176	-0.263615	0.0768552	-3.43002	0.000603538	0.00274073	NOT_CHANGE	CoA transferase subunit B	Cytoplasmic [Class 3]
1174	PA14_02870	NA	PA14_02870	768.769	-0.0420635	0.0638793	-0.658483	0.510227	0.657724	NOT_CHANGE	transcriptional regulator	Cytoplasmic [Class 3]
1175	PA14_02890	NA	PA14_02890	955.404	-0.141654	0.0832443	-1.70166	0.0888188	0.181399	NOT_CHANGE	hypothetical protein	Unknown [Class 3]
1176	PA14_02910	NA	PA14_02910	120.356	-1.99157	0.161349	-12.3433	5.2973e-35	1.99613e-33	NOT_CHANGE	IclR family transcriptional regulator	Cytoplasmic [Class 3]
1177	PA14_02930	NA	PA14_02930	4262.51	-0.0439315	0.0648696	-0.677228	0.498261	0.646694	NOT_CHANGE	oxidoreductase	Periplasmic [Class 3]
1178	PA14_02960	NA	PA14_02960	68.2137	-0.0654615	0.17618	-0.371561	0.710219	0.815241	NOT_CHANGE	hypothetical protein	Cytoplasmic [Class 3]
1179	PA14_02970	NA	PA14_02970	421.001	-0.515759	0.124224	-4.15186	3.2979e-05	0.000190896	NOT_CHANGE	hypothetical protein	Cytoplasmic Membrane [Class 3]
1180	PA14_02980	NA	PA14_02980	391.771	-0.224987	0.0987483	-2.27839	0.0227032	0.0618387	NOT_CHANGE	porin	Outer Membrane [Class 3]
1181	PA14_02990	NA	PA14_02990	717.738	-0.102737	0.0829956	-1.23786	0.215767	0.360245	NOT_CHANGE	MFS transporter	Cytoplasmic Membrane [Class 3]
1182	PA14_03000	NA	PA14_03000	602.172	-0.765993	0.0917256	-8.35092	6.77326e-17	1.11387e-15	NOT_CHANGE	hypothetical protein	Cytoplasmic [Class 3]
1183	PA14_03010	NA	PA14_03010	2387.89	0.288415	0.0725212	3.97697	6.9799e-05	0.000383355	NOT_CHANGE	TetR family transcriptional regulator	Cytoplasmic [Class 3]
1184	PA14_03020	NA	PA14_03020	146.111	-0.273152	0.151516	-1.80279	0.0714208	0.153353	NOT_CHANGE	shikimate 5-dehydrogenase	Cytoplasmic [Class 3]
1185	PA14_03070	NA	PA14_03070	163.578	-0.166105	0.124658	-1.33248	0.182701	0.318398	NOT_CHANGE	transcriptional regulator	Cytoplasmic [Class 3]
1186	PA14_03080	NA	PA14_03080	143.4	-0.0901739	0.128595	-0.701224	0.483163	0.63229	NOT_CHANGE	acetyltransferase	Unknown [Class 3]
1187	PA14_03090	NA	PA14_03090	325.526	-0.0442125	0.0929367	-0.475727	0.634269	0.759788	NOT_CHANGE	hypothetical protein	Unknown [Class 3]
1188	PA14_03100	NA	PA14_03100	186.792	-0.249157	0.130455	-1.90991	0.0561443	0.128143	NOT_CHANGE	hypothetical protein	Cytoplasmic [Class 3]
1189	PA14_03110	NA	PA14_03110	1355.14	-0.153629	0.0696868	-2.20457	0.0274843	0.0722656	NOT_CHANGE	hypothetical protein	Unknown [Class 3]
1190	PA14_03120	NA	PA14_03120	3258.66	-0.208125	0.0916776	-2.27018	0.0231967	0.0630321	NOT_CHANGE	transcriptional regulator	Cytoplasmic [Class 3]
1191	PA14_03130	NA	PA14_03130	497.176	0.625757	0.0803954	7.78349	7.05512e-15	1.04814e-13	NOT_CHANGE	hypothetical protein	Cytoplasmic [Class 3]
1192	PA14_03150	NA	PA14_03150	715.388	-0.130469	0.0738024	-1.76782	0.0770918	0.162705	NOT_CHANGE	hypothetical protein	Cytoplasmic Membrane [Class 3]
1193	PA14_03160	NA	PA14_03160	893.402	-0.173413	0.0626119	-2.76965	0.00561162	0.0192234	NOT_CHANGE	hypothetical protein	Cytoplasmic [Class 3]
1194	PA14_03163	NA	PA14_03163	289.137	0.750547	0.13558	5.53582	3.09776e-08	2.71591e-07	NOT_CHANGE	hypothetical protein	Cytoplasmic [Class 3]
1195	PA14_03166	NA	PA14_03166	305.215	0.0340846	0.0904113	0.376995	0.706177	0.811911	NOT_CHANGE	hypothetical protein	Unknown [Class 3]
1196	PA14_03170	NA	PA14_03170	1644	-0.0765154	0.057139	-1.33911	0.180535	0.315686	NOT_CHANGE	hypothetical protein	Cytoplasmic [Class 3]
1197	PA14_03180	NA	PA14_03180	399.56	-0.277224	0.0924494	-2.99865	0.00271175	0.0102866	NOT_CHANGE	hypothetical protein	Cytoplasmic [Class 3]
1198	PA14_03210	NA	PA14_03210	399.808	0.0954042	0.0900597	1.05934	0.289443	0.446323	NOT_CHANGE	hypothetical protein	Unknown [Class 3]
1199	PA14_03250	NA	PA14_03250	205.77	-0.146454	0.109219	-1.34092	0.179946	0.315044	NOT_CHANGE	hypothetical protein	Cytoplasmic [Class 3]
1200	PA14_03265	NA	PA14_03265	2375.74	-0.266658	0.078938	-3.37807	0.000729957	0.0032373	NOT_CHANGE	hypothetical protein	Cytoplasmic [Class 3]
1201	PA14_03270	NA	PA14_03270	353.652	-0.0147738	0.113049	-0.130685	0.896024	0.944826	NOT_CHANGE	hypothetical protein	Cytoplasmic [Class 3]
1202	PA14_03285	NA	PA14_03285	1060.65	0.0457076	0.125147	0.36523	0.71494	0.818424	NOT_CHANGE	hypothetical protein	Cytoplasmic [Class 3]
1203	PA14_03290	NA	PA14_03290	1107.08	-0.0660643	0.0737477	-0.895815	0.370352	0.529473	NOT_CHANGE	hypothetical protein	Unknown [Class 3]
1204	PA14_03300	NA	PA14_03300	4062.5	-0.209333	0.0781764	-2.6777	0.00741302	0.0244381	NOT_CHANGE	hypothetical protein	Unknown [Class 3]
1205	PA14_03310	NA	PA14_03310	629.074	-0.0158366	0.0802211	-0.197412	0.843505	0.912461	NOT_CHANGE	hypothetical protein	Cytoplasmic [Class 3]
1206	PA14_03320	NA	PA14_03320	1854.74	0.262688	0.101298	2.59322	0.00950816	0.0300898	NOT_CHANGE	hypothetical protein	Unknown [Class 3]
1207	PA14_03330	NA	PA14_03330	12.6805	-0.295679	0.371867	-0.795121	0.426543	0.582022	NOT_CHANGE	hypothetical protein	Cytoplasmic [Class 3]
1208	PA14_03340	NA	PA14_03340	427.487	0.0266836	0.083453	0.319744	0.749162	0.843438	NOT_CHANGE	hypothetical protein	Cytoplasmic [Class 3]
1209	PA14_03350	NA	PA14_03350	3336.05	0.021574	0.0813042	0.26535	0.79074	0.875182	NOT_CHANGE	hypothetical protein	Cytoplasmic [Class 3]
1210	PA14_03360	NA	PA14_03360	104.095	0.100008	0.160011	0.625006	0.531967	0.67706	NOT_CHANGE	hypothetical protein	Unknown [Class 3]
1211	PA14_03370	NA	PA14_03370	48.3552	-0.665401	0.21031	-3.16391	0.00155665	0.00636761	NOT_CHANGE	hypothetical protein	Cytoplasmic Membrane [Class 3]
1212	PA14_03380	NA	PA14_03380	381.672	-0.0561777	0.110089	-0.510295	0.609845	0.742567	NOT_CHANGE	hypothetical protein	Unknown [Class 3]
1213	PA14_03390	NA	PA14_03390	280.278	0.255701	0.0941404	2.71617	0.00660426	0.0221832	NOT_CHANGE	hypothetical protein	Cytoplasmic [Class 3]
1214	PA14_03400	NA	PA14_03400	223.943	0.350702	0.121043	2.89733	0.00376357	0.0136139	NOT_CHANGE	hypothetical protein	Cytoplasmic [Class 3]
1215	PA14_03410	NA	PA14_03410	96.1908	1.08337	0.179491	6.03578	1.58192e-09	1.55999e-08	NOT_CHANGE	tRNA-Arg
1216	PA14_03420	NA	PA14_03420	1144.16	-0.0393551	0.120876	-0.325584	0.744739	0.840287	NOT_CHANGE	hypothetical protein	Unknown [Class 3]
1217	PA14_03470	NA	PA14_03470	3.09184	-0.305184	0.809498	-0.377004	0.70617	0.811911	NOT_CHANGE	hypothetical protein	Cytoplasmic [Class 3]
1218	PA14_03480	NA	PA14_03480	211.489	-0.228496	0.144928	-1.57661	0.114885	0.222725	NOT_CHANGE	GntR family transcriptional regulator	Cytoplasmic [Class 3]
1219	PA14_03490	NA	PA14_03490	160.138	0.0441284	0.131258	0.336196	0.736723	0.834479	NOT_CHANGE	hypothetical protein	Unknown [Class 3]
1220	PA14_03510	NA	PA14_03510	3192.6	-0.0425604	0.0738486	-0.57632	0.564399	0.704106	NOT_CHANGE	hypothetical protein	Unknown [Class 3]
1221	PA14_03520	NA	PA14_03520	791.892	0.0266178	0.0747781	0.355957	0.721872	0.824128	NOT_CHANGE	hypothetical protein	Unknown [Class 3]
1222	PA14_03530	NA	PA14_03530	2503.31	0.129743	0.0794076	1.63388	0.102283	0.203921	NOT_CHANGE	transcriptional regulator	Cytoplasmic [Class 3]
1223	PA14_03550	NA	PA14_03550	720.783	-0.279181	0.0894214	-3.12208	0.00179578	0.00718058	NOT_CHANGE	MFS transporter	Cytoplasmic Membrane [Class 3]
1224	PA14_03560	NA	PA14_03560	92.1691	-0.154776	0.183071	-0.845443	0.397864	0.55609	NOT_CHANGE	hypothetical protein	Outer Membrane [Class 3]
1225	PA14_03580	NA	PA14_03580	487.981	0.0183037	0.0809861	0.22601	0.821193	0.896162	NOT_CHANGE	transcriptional regulator	Cytoplasmic [Class 3]
1226	PA14_03590	NA	PA14_03590	649.717	-0.110225	0.0735518	-1.49861	0.133976	0.252174	NOT_CHANGE	hypothetical protein	Cytoplasmic Membrane [Class 3]
1227	PA14_03610	NA	PA14_03610	483.32	-0.2026	0.124487	-1.62748	0.103636	0.205969	NOT_CHANGE	Zn-dependent protease with chaperone function	Unknown [Class 3]
1228	PA14_03620	NA	PA14_03620	1586.9	0.50547	0.0975661	5.1808	2.20939e-07	1.75824e-06	NOT_CHANGE	hypothetical protein	Cytoplasmic Membrane [Class 3]
1229	PA14_03630	NA	PA14_03630	296.872	-0.0105078	0.11181	-0.0939795	0.925125	0.96208	NOT_CHANGE	ArsR family transcriptional regulator	Unknown [Class 3]
1230	PA14_03710	NA	PA14_03710	66.8573	-0.335801	0.183872	-1.82627	0.0678091	0.147546	NOT_CHANGE	hypothetical protein	Unknown [Class 3]
1231	PA14_03720	NA	PA14_03720	130.898	0.317309	0.131804	2.40742	0.0160655	0.0463789	NOT_CHANGE	sensory box GGDEF domain-containing protein	Cytoplasmic Membrane [Class 3]
1232	PA14_03730	NA	PA14_03730	50.6067	1.09705	0.261966	4.18775	2.81728e-05	0.000165261	NOT_CHANGE	fatty acid desaturase	Cytoplasmic Membrane [Class 3]
1233	PA14_03760	NA	PA14_03760	141.772	-2.3383	0.186341	-12.5485	4.05127e-36	1.60081e-34	DOWN	sodium:solute symporter	Cytoplasmic Membrane [Class 3]
1234	PA14_03780	NA	PA14_03780	1542.57	-0.163436	0.0583132	-2.80273	0.00506721	0.0175915	NOT_CHANGE	transcriptional regulator	Cytoplasmic [Class 3]
1235	PA14_03790	NA	PA14_03790	21.6322	-0.53839	0.309649	-1.73871	0.0820856	0.170518	NOT_CHANGE	sensory box GGDEF domain-containing protein	Cytoplasmic Membrane [Class 3]
1236	PA14_03855	NA	PA14_03855	338.742	-0.128485	0.123829	-1.03761	0.299453	0.457911	NOT_CHANGE	periplasmic polyamine binding protein	Periplasmic [Class 3]
1237	PA14_03860	NA	PA14_03860	934.934	-0.0758836	0.0737964	-1.02828	0.303817	0.462719	NOT_CHANGE	glutamine synthetase	Cytoplasmic [Class 3]
1238	PA14_03980	NA	PA14_03980	3000.37	-0.234004	0.0688494	-3.39878	0.000676872	0.00302783	NOT_CHANGE	hypothetical protein	Periplasmic [Class 3]
1239	PA14_04000	NA	PA14_04000	45.686	-0.204186	0.231983	-0.880179	0.378762	0.537983	NOT_CHANGE	transcriptional regulator	Cytoplasmic [Class 3]
1240	PA14_04010	NA	PA14_04010	359.297	-0.141355	0.0966848	-1.46202	0.143736	0.266657	NOT_CHANGE	hypothetical protein	Unknown (This protein may have multiple localization sites) [Class 3]
1241	PA14_04020	NA	PA14_04020	8.95646	0.523231	0.498392	1.04984	0.293793	0.45144	NOT_CHANGE	hypothetical protein	Unknown [Class 3]
1242	PA14_04030	NA	PA14_04030	1393.11	-0.014237	0.0569038	-0.250194	0.802437	0.88383	NOT_CHANGE	hypothetical protein	Cytoplasmic [Class 3]
1243	PA14_04040	NA	PA14_04040	1726.12	0.37702	0.0694911	5.42545	5.78097e-08	4.90219e-07	NOT_CHANGE	hypothetical protein	Unknown [Class 3]
1244	PA14_04050	NA	PA14_04050	2102.52	-0.0250564	0.0677305	-0.369942	0.711426	0.816296	NOT_CHANGE	proline hydroxylase	Cytoplasmic [Class 3]
1245	PA14_04060	NA	PA14_04060	97.0295	-0.125717	0.163249	-0.770098	0.441242	0.596925	NOT_CHANGE	hypothetical protein	Unknown [Class 3]
1246	PA14_04070	NA	PA14_04070	412.368	-0.358732	0.101682	-3.52798	0.000418745	0.0019724	NOT_CHANGE	hypothetical protein	Cytoplasmic [Class 3]
1247	PA14_04080	NA	PA14_04080	3485.76	-0.270114	0.0854838	-3.15982	0.00157865	0.00643445	NOT_CHANGE	ABC transporter permease	Cytoplasmic Membrane [Class 3]
1248	PA14_04090	NA	PA14_04090	69.0406	-1.93866	0.204385	-9.48537	2.41534e-21	4.89084e-20	NOT_CHANGE	ABC transporter substrate-binding protein	Periplasmic [Class 3]
1249	PA14_04100	NA	PA14_04100	442.145	-0.156772	0.0892488	-1.75658	0.0789899	0.165592	NOT_CHANGE	hypothetical protein	Unknown [Class 3]
1250	PA14_04140	NA	PA14_04140	1035.01	-0.0983362	0.0767339	-1.28152	0.20001	0.34094	NOT_CHANGE	hypothetical protein	Cytoplasmic [Class 3]
1251	PA14_04150	NA	PA14_04150	937.057	0.325071	0.0988273	3.28929	0.00100442	0.00432312	NOT_CHANGE	hypothetical protein	Cytoplasmic [Class 3]
1252	PA14_04180	NA	PA14_04180	9.96588	-0.225696	0.417771	-0.540238	0.589033	0.72416	NOT_CHANGE	hypothetical protein	Unknown (This protein may have multiple localization sites) [Class 3]
1253	PA14_04190	NA	PA14_04190	762.409	-0.470708	0.0931344	-5.05407	4.32494e-07	3.33454e-06	NOT_CHANGE	acetylpolyamine aminohydrolase	Cytoplasmic [Class 3]
1254	PA14_04210	NA	PA14_04210	239.156	-0.0277359	0.155107	-0.178818	0.858081	0.919661	NOT_CHANGE	transporter	Cytoplasmic Membrane [Class 3]
1255	PA14_04220	NA	PA14_04220	1869.08	-0.00958444	0.0939419	-0.102025	0.918737	0.958667	NOT_CHANGE	ABC transporter substrate-binding protein	Periplasmic [Class 3]
1256	PA14_04230	NA	PA14_04230	2223.76	0.152089	0.0814355	1.8676	0.0618182	0.138031	NOT_CHANGE	ABC transporter permease	Cytoplasmic Membrane [Class 3]
1257	PA14_04240	NA	PA14_04240	1209.4	0.102487	0.0884736	1.1584	0.246703	0.395879	NOT_CHANGE	ABC transporter permease	Cytoplasmic Membrane [Class 3]
1258	PA14_04250	NA	PA14_04250	448.786	0.0863728	0.104474	0.82674	0.408384	0.565792	NOT_CHANGE	ABC transporter ATP-binding protein	Cytoplasmic Membrane [Class 3]
1259	PA14_04270	NA	PA14_04270	1224.3	0.133653	0.0823886	1.62223	0.104755	0.207238	NOT_CHANGE	transcriptional regulator	Cytoplasmic Membrane [Class 3]
1260	PA14_04290	NA	PA14_04290	160.123	-0.0626876	0.117547	-0.533299	0.593827	0.727578	NOT_CHANGE	hypothetical protein	Outer Membrane [Class 3]
1261	PA14_04300	NA	PA14_04300	1216.08	-0.0105391	0.0860145	-0.122527	0.902482	0.948664	NOT_CHANGE	hypothetical protein	Unknown [Class 3]
1262	PA14_04330	NA	PA14_04330	70.5673	0.113571	0.178825	0.635094	0.525367	0.671008	NOT_CHANGE	hypothetical protein	Cytoplasmic Membrane [Class 3]
1263	PA14_04340	NA	PA14_04340	665.189	-0.277988	0.0978853	-2.83994	0.00451227	0.0159076	NOT_CHANGE	hypothetical protein	Cytoplasmic Membrane [Class 3]
1264	PA14_04350	NA	PA14_04350	508.339	0.222041	0.115007	1.93068	0.0535223	0.123246	NOT_CHANGE	integral membrane protein	Cytoplasmic Membrane [Class 3]
1265	PA14_04370	NA	PA14_04370	625.211	-1.48401	0.10737	-13.8214	1.89327e-43	9.05271e-42	NOT_CHANGE	MFS transporter	Cytoplasmic Membrane [Class 3]
1266	PA14_04380	NA	PA14_04380	4.72505	2.15743	0.770619	2.79961	0.00511649	0.0177301	UP	hypothetical protein	Cytoplasmic [Class 3]
1267	PA14_04420	NA	PA14_04420	694.944	0.0075022	0.0903294	0.0830538	0.933809	0.965541	NOT_CHANGE	hypothetical protein	Cytoplasmic [Class 3]
1268	PA14_04430	NA	PA14_04430	14.8597	-1.18992	0.380937	-3.12366	0.00178618	0.00715732	NOT_CHANGE	hypothetical protein	Unknown [Class 3]
1269	PA14_04440	NA	PA14_04440	78.5165	-0.168313	0.198047	-0.849862	0.395402	0.554147	NOT_CHANGE	permease	Cytoplasmic Membrane [Class 3]
1270	PA14_04490	NA	PA14_04490	614.504	0.0732097	0.0834028	0.877784	0.380061	0.53902	NOT_CHANGE	hypothetical protein	Cytoplasmic [Class 3]
1271	PA14_04510	NA	PA14_04510	607.087	0.20346	0.0756657	2.68893	0.00716819	0.023741	NOT_CHANGE	hypothetical protein	Cytoplasmic [Class 3]
1272	PA14_04520	NA	PA14_04520	68.4519	-0.234421	0.166197	-1.4105	0.158392	0.286202	NOT_CHANGE	hypothetical protein	Cytoplasmic Membrane [Class 3]
1273	PA14_04530	NA	PA14_04530	72.5416	-1.61154	0.179496	-8.97812	2.75433e-19	5.07188e-18	NOT_CHANGE	hypothetical protein	Unknown [Class 3]
1274	PA14_04560	NA	PA14_04560	1922.78	0.282154	0.108302	2.60525	0.00918061	0.0292976	NOT_CHANGE	hypothetical protein	Unknown [Class 3]
1275	PA14_04570	NA	PA14_04570	797.587	-0.21379	0.0962013	-2.22232	0.0262619	0.0695442	NOT_CHANGE	hypothetical protein	Unknown [Class 3]
1276	PA14_04590	NA	PA14_04590	1170.28	-0.155238	0.125206	-1.23986	0.215026	0.35943	NOT_CHANGE	hypothetical protein	Cytoplasmic [Class 3]
1277	PA14_04610	NA	PA14_04610	649.007	-0.0474828	0.0700612	-0.677733	0.497941	0.646426	NOT_CHANGE	transporter	Cytoplasmic Membrane [Class 3]
1278	PA14_04640	NA	PA14_04640	2170.12	0.308408	0.107553	2.8675	0.00413723	0.0147684	NOT_CHANGE	hypothetical protein	Cytoplasmic [Class 3]
1279	PA14_04660	NA	PA14_04660	224.066	0.531793	0.183115	2.90415	0.00368253	0.0133718	NOT_CHANGE	hypothetical protein	Unknown [Class 3]
1280	PA14_04690	NA	PA14_04690	17.6629	0.0288656	0.376348	0.0766991	0.938863	0.968479	NOT_CHANGE	hypothetical protein	Cytoplasmic Membrane [Class 3]
1281	PA14_04700	NA	PA14_04700	423.929	-0.0329777	0.0938187	-0.351504	0.72521	0.826612	NOT_CHANGE	hypothetical protein	Extracellular [Class 3]
1282	PA14_04710	NA	PA14_04710	276.869	0.0115061	0.105887	0.108664	0.913469	0.955264	NOT_CHANGE	hypothetical protein	Unknown [Class 3]
1283	PA14_04730	NA	PA14_04730	1677.06	-0.0276496	0.0657357	-0.420618	0.674034	0.7911	NOT_CHANGE	gamma-glutamyltranspeptidase	Periplasmic [Class 3]
1284	PA14_04830	NA	PA14_04830	2254.79	0.261249	0.175229	1.4909	0.135988	0.254446	NOT_CHANGE	acetyltransferase	Unknown [Class 3]
1285	PA14_04860	NA	PA14_04860	979.575	-0.208748	0.090833	-2.29815	0.0215532	0.059131	NOT_CHANGE	methyltransferase	Unknown [Class 3]
1286	PA14_04870	NA	PA14_04870	342.339	-0.210416	0.0974122	-2.16006	0.0307682	0.0790388	NOT_CHANGE	hypothetical protein	Unknown (This protein may have multiple localization sites) [Class 3]
1287	PA14_04940	NA	PA14_04940	1479.18	-0.0793684	0.075479	-1.05153	0.293016	0.450611	NOT_CHANGE	hypothetical protein	Unknown [Class 3]
1288	PA14_04960	NA	PA14_04960	16.4969	-0.012172	0.337882	-0.0360243	0.971263	0.984236	NOT_CHANGE	hypothetical protein	Cytoplasmic Membrane [Class 3]
1289	PA14_04970	NA	PA14_04970	595.579	-0.763534	0.204395	-3.73558	0.000187282	0.000948072	NOT_CHANGE	sulfur carrier protein ThiS	Unknown [Class 3]
1290	PA14_05010	NA	PA14_05010	469.03	-0.0862811	0.0756369	-1.14073	0.253983	0.404808	NOT_CHANGE	hypothetical protein	Unknown [Class 3]
1291	PA14_05020	NA	PA14_05020	1685.59	0.039398	0.079959	0.492727	0.622205	0.750534	NOT_CHANGE	hypothetical protein	Unknown [Class 3]
1292	PA14_05030	NA	PA14_05030	0.778198	1.09788	1.67927	0.653787	0.513249	0.660571	NOT_CHANGE	hypothetical protein	Cytoplasmic Membrane [Class 3]
1293	PA14_05040	NA	PA14_05040	310.689	0.227098	0.101404	2.23953	0.0251215	0.0672983	NOT_CHANGE	coproporphyrinogen III oxidase	Cytoplasmic [Class 3]
1294	PA14_05050	NA	PA14_05050	1088.13	0.372218	0.120774	3.08194	0.00205659	0.00809268	NOT_CHANGE	deoxyribonucleotide triphosphate pyrophosphatase	Cytoplasmic [Class 3]
1295	PA14_05060	NA	PA14_05060	927.784	-0.683327	0.070856	-9.6439	5.21697e-22	1.10763e-20	NOT_CHANGE	hypothetical protein	Unknown [Class 3]
1296	PA14_05070	NA	PA14_05070	1867.04	1.76516	0.132185	13.3537	1.1272e-40	5.01075e-39	NOT_CHANGE	methionine biosynthesis protein	Cytoplasmic [Class 3]
1297	PA14_05110	NA	PA14_05110	353.319	0.252308	0.150796	1.67317	0.0942934	0.190191	NOT_CHANGE	hypothetical protein	Cytoplasmic [Class 3]
1298	PA14_05120	NA	PA14_05120	438.948	-0.0894993	0.0850547	-1.05226	0.292683	0.45022	NOT_CHANGE	hypothetical protein	Unknown [Class 3]
1299	PA14_05130	NA	PA14_05130	1351.27	0.317651	0.0650279	4.88484	1.03513e-06	7.56083e-06	NOT_CHANGE	hypothetical protein	Cytoplasmic Membrane [Class 3]
1300	PA14_05160	NA	PA14_05160	1200.46	0.601605	0.178079	3.3783	0.000729347	0.00323712	NOT_CHANGE	hypothetical protein	Cytoplasmic [Class 3]
1301	PA14_05200	NA	PA14_05200	804.996	-0.157153	0.0762268	-2.06165	0.0392413	0.0962427	NOT_CHANGE	cation efflux system protein	Cytoplasmic Membrane [Class 3]
1302	PA14_05210	NA	PA14_05210	446.394	0.161431	0.0949513	1.70015	0.0891029	0.181719	NOT_CHANGE	hypothetical protein	Cytoplasmic Membrane [Class 3]
1303	PA14_05220	NA	PA14_05220	401.037	-0.353694	0.101545	-3.48314	0.000495572	0.00230753	NOT_CHANGE	cystathionine beta-synthase	Cytoplasmic [Class 3]
1304	PA14_05230	NA	PA14_05230	2150.95	-0.444134	0.0664764	-6.68108	2.37193e-11	2.70466e-10	NOT_CHANGE	cystathionine gamma-lyase	Cytoplasmic [Class 3]
1305	PA14_05290	NA	PA14_05290	176.214	0.0606626	0.131259	0.462158	0.643968	0.767479	NOT_CHANGE	hypothetical protein	Unknown [Class 3]
1306	PA14_05300	NA	PA14_05300	316.99	0.244908	0.162164	1.51025	0.13098	0.248012	NOT_CHANGE	TonB domain-containing protein	Unknown [Class 3]
1307	PA14_05400	NA	PA14_05400	1787.86	-0.0261376	0.0770747	-0.33912	0.734519	0.833217	NOT_CHANGE	methylesterase	Cytoplasmic [Class 3]
1308	PA14_05410	NA	PA14_05410	201.393	0.121048	0.121619	0.995304	0.319589	0.479299	NOT_CHANGE	chemotaxis protein	Unknown [Class 3]
1309	PA14_05420	NA	PA14_05420	528.951	0.380826	0.0827118	4.60425	4.13951e-06	2.79669e-05	NOT_CHANGE	transcriptional regulator	Cytoplasmic [Class 3]
1310	PA14_05430	NA	PA14_05430	12.0704	-1.13152	0.402706	-2.80979	0.00495745	0.0172736	NOT_CHANGE	chemotaxis protein	Cytoplasmic Membrane [Class 3]
1311	PA14_05440	NA	PA14_05440	405.029	1.17935	0.487685	2.41826	0.015595	0.0452501	NOT_CHANGE	hypothetical protein	Cytoplasmic [Class 3]
1312	PA14_05480	NA	PA14_05480	1165.99	-0.113831	0.0601298	-1.89309	0.0583465	0.132182	NOT_CHANGE	hypothetical protein	Unknown [Class 3]
1313	PA14_05510	NA	PA14_05510	492.859	0.0304571	0.0902498	0.337475	0.735759	0.834217	NOT_CHANGE	hypothetical protein	Unknown [Class 3]
1314	PA14_05560	NA	PA14_05560	23.3287	2.41616	0.392224	6.16014	7.26785e-10	7.3715e-09	UP	ATP-dependent RNA helicase	Cytoplasmic [Class 3]
1315	PA14_05580	NA	PA14_05580	638.232	0.425306	0.0795149	5.34876	8.85577e-08	7.42111e-07	NOT_CHANGE	hypothetical protein	Cytoplasmic [Class 3]
1316	PA14_05600	NA	PA14_05600	138.374	1.47831	0.20536	7.19862	6.08238e-13	7.62307e-12	NOT_CHANGE	hypothetical protein	Unknown [Class 3]
1317	PA14_05630	NA	PA14_05630	983.16	-0.27653	0.0888519	-3.11226	0.00185663	0.00739275	NOT_CHANGE	hypothetical protein	Cytoplasmic Membrane [Class 3]
1318	PA14_05650	NA	PA14_05650	509.597	-0.141134	0.0801845	-1.76012	0.0783875	0.164706	NOT_CHANGE	hypothetical protein	Cytoplasmic Membrane [Class 3]
1319	PA14_05660	NA	PA14_05660	895.897	-0.0610027	0.0956106	-0.638033	0.523452	0.669313	NOT_CHANGE	transcriptional regulator	Cytoplasmic [Class 3]
1320	PA14_05740	NA	PA14_05740	479.115	-0.745642	0.0852894	-8.74249	2.2802e-18	3.96769e-17	NOT_CHANGE	dihydropyrimidine dehydrogenase	Cytoplasmic [Class 3]
1321	PA14_05750	NA	PA14_05750	389.918	0.112987	0.0827274	1.36578	0.172009	0.304507	NOT_CHANGE	oxidoreductase	Cytoplasmic [Class 3]
1322	PA14_05775	NA	PA14_05775	199.619	0.341696	0.128258	2.66413	0.0077187	0.0252221	NOT_CHANGE	hypothetical protein	Unknown [Class 3]
1323	PA14_05790	NA	PA14_05790	617.198	-0.216909	0.0967035	-2.24304	0.0248946	0.0667845	NOT_CHANGE	transporter	Cytoplasmic Membrane [Class 3]
1324	PA14_05820	NA	PA14_05820	29.2979	-0.179399	0.344065	-0.52141	0.602081	0.734214	NOT_CHANGE	hypothetical protein	Cytoplasmic [Class 3]
1325	PA14_05850	NA	PA14_05850	449.651	0.0664964	0.0852614	0.779913	0.435442	0.591328	NOT_CHANGE	LysR family transcriptional regulator	Cytoplasmic [Class 3]
1326	PA14_05860	NA	PA14_05860	701.247	0.158335	0.0674492	2.34747	0.0189012	0.0530382	NOT_CHANGE	hypothetical protein	Cytoplasmic [Class 3]
1327	PA14_05870	NA	PA14_05870	141.152	-0.611985	0.139617	-4.3833	1.16897e-05	7.31731e-05	NOT_CHANGE	phosphate transporter	Cytoplasmic Membrane [Class 3]
1328	PA14_05880	NA	PA14_05880	679.994	0.0160487	0.0778268	0.206211	0.836626	0.908647	NOT_CHANGE	membrane-bound protease	Cytoplasmic Membrane [Class 3]
1329	PA14_05890	NA	PA14_05890	1390.77	-0.0832489	0.0628081	-1.32545	0.185023	0.321264	NOT_CHANGE	stomatin-like protein	Unknown [Class 3]
1330	PA14_05910	NA	PA14_05910	242.432	-0.0443054	0.102879	-0.430656	0.666718	0.78543	NOT_CHANGE	periplasmic transport system	Unknown (This protein may have multiple localization sites) [Class 3]
1331	PA14_05920	NA	PA14_05920	44.8451	2.58339	0.289899	8.91134	5.04202e-19	9.13666e-18	UP	hypothetical protein	Cytoplasmic Membrane [Class 3]
1332	PA14_05960	NA	PA14_05960	300.053	-0.507449	0.125847	-4.03228	5.5238e-05	0.000308444	NOT_CHANGE	cold-shock protein	Cytoplasmic [Class 3]
1333	PA14_05970	NA	PA14_05970	202.705	-0.454891	0.112494	-4.0437	5.2615e-05	0.000295246	NOT_CHANGE	hypothetical protein	Unknown [Class 3]
1334	PA14_05990	NA	PA14_05990	464.977	0.0156488	0.0865735	0.180757	0.856558	0.918908	NOT_CHANGE	EmrB/QacA family drug resistance transporter	Cytoplasmic Membrane [Class 3]
1335	PA14_06010	NA	PA14_06010	8.56048	0.316674	0.4711	0.672201	0.501456	0.649803	NOT_CHANGE	hypothetical protein	Unknown [Class 3]
1336	PA14_06030	NA	PA14_06030	898.223	0.965792	0.111976	8.62499	6.40991e-18	1.09527e-16	NOT_CHANGE	acyltransferase	Cytoplasmic Membrane [Class 3]
1337	PA14_06040	NA	PA14_06040	231.454	0.197841	0.181052	1.09273	0.274511	0.42923	NOT_CHANGE	hypothetical protein	Unknown [Class 3]
1338	PA14_06090	NA	PA14_06090	61.0646	0.70857	0.200701	3.53047	0.00041482	0.00195553	NOT_CHANGE	hypothetical protein	Cytoplasmic Membrane [Class 3]
1339	PA14_06120	NA	PA14_06120	359.947	0.0423709	0.0986213	0.429632	0.667463	0.786145	NOT_CHANGE	hypothetical protein	Cytoplasmic [Class 3]
1340	PA14_06130	NA	PA14_06130	418.96	-0.0995167	0.102323	-0.972576	0.330764	0.490756	NOT_CHANGE	hypothetical protein	Unknown [Class 3]
1341	PA14_06150	NA	PA14_06150	2060.12	0.0133284	0.0789649	0.168789	0.865963	0.925008	NOT_CHANGE	hypothetical protein	Cytoplasmic [Class 3]
1342	PA14_06160	NA	PA14_06160	1625.92	-0.0858835	0.0704706	-1.21871	0.222953	0.368351	NOT_CHANGE	hydroxamate-type ferrisiderophore receptor	Outer Membrane [Class 3]
1343	PA14_06170	NA	PA14_06170	699.215	0.0185546	0.0706043	0.262797	0.792707	0.876677	NOT_CHANGE	transmembrane sensor	Periplasmic [Class 3]
1344	PA14_06180	NA	PA14_06180	7.25898	-1.22412	0.560108	-2.1855	0.0288519	0.0750307	NOT_CHANGE	RNA polymerase sigma factor	Cytoplasmic [Class 3]
1345	PA14_06190	NA	PA14_06190	433.56	-0.00123786	0.0915567	-0.0135201	0.989213	0.9943	NOT_CHANGE	glutathione S-transferase	Cytoplasmic [Class 3]
1346	PA14_06200	NA	PA14_06200	896.803	0.75219	0.0768772	9.7843	1.315e-22	2.845e-21	NOT_CHANGE	hypothetical protein	Unknown [Class 3]
1347	PA14_06210	NA	PA14_06210	1236.15	1.65245	0.0965236	17.1197	1.05832e-65	9.40913e-64	NOT_CHANGE	transcriptional regulator	Cytoplasmic [Class 3]
1348	PA14_06230	NA	PA14_06230	241.103	-0.0496802	0.100042	-0.496592	0.619477	0.74837	NOT_CHANGE	permease	Cytoplasmic Membrane [Class 3]
1349	PA14_06240	NA	PA14_06240	3954.04	3.8332	0.123514	31.0345	1.84422e-211	2.09872e-208	UP	LysR family transcriptional regulator	Cytoplasmic [Class 3]
1350	PA14_06250	NA	PA14_06250	1413.66	-0.166103	0.0844406	-1.9671	0.0491713	0.114996	NOT_CHANGE	GNAT family acetyltransferase	Cytoplasmic [Class 3]
1351	PA14_06260	NA	PA14_06260	622.386	0.360317	0.0860491	4.18734	2.82241e-05	0.000165392	NOT_CHANGE	LysR family transcriptional regulator	Cytoplasmic [Class 3]
1352	PA14_06270	NA	PA14_06270	1290.83	0.147894	0.0735277	2.0114	0.0442828	0.105869	NOT_CHANGE	hydrolase	Cytoplasmic [Class 3]
1353	PA14_06280	NA	PA14_06280	927.7	-0.130096	0.0752794	-1.72818	0.0839557	0.173145	NOT_CHANGE	hypothetical protein	Unknown [Class 3]
1354	PA14_06300	NA	PA14_06300	167.507	0.0140553	0.168243	0.0835416	0.933421	0.965541	NOT_CHANGE	GNAT family acetyltransferase	Cytoplasmic [Class 3]
1355	PA14_06310	NA	PA14_06310	183.69	-0.544318	0.138117	-3.94099	8.1146e-05	0.000439734	NOT_CHANGE	ACT domain-containing protein	Cytoplasmic [Class 3]
1356	PA14_06320	NA	PA14_06320	263.236	1.29232	0.176742	7.31187	2.63454e-13	3.40694e-12	NOT_CHANGE	hypothetical protein	Cytoplasmic Membrane [Class 3]
1357	PA14_06330	NA	PA14_06330	290.665	0.488299	0.111606	4.37523	1.21306e-05	7.56834e-05	NOT_CHANGE	serine/threonine protein kinase	Cytoplasmic [Class 3]
1358	PA14_06340	NA	PA14_06340	1539.95	0.0843709	0.066961	1.26	0.207669	0.350426	NOT_CHANGE	molybdenum transport regulator	Cytoplasmic [Class 3]
1359	PA14_06350	NA	PA14_06350	137.177	-0.267013	0.168282	-1.5867	0.112581	0.219379	NOT_CHANGE	hypothetical protein	Cytoplasmic Membrane [Class 3]
1360	PA14_06360	NA	PA14_06360	1065.42	0.0523941	0.0794586	0.659389	0.509646	0.657272	NOT_CHANGE	phosphoribosyl transferase	Cytoplasmic [Class 3]
1361	PA14_06390	NA	PA14_06390	770.84	-0.192734	0.07474	-2.57873	0.00991635	0.0311048	NOT_CHANGE	hypothetical protein	Cytoplasmic Membrane [Class 3]
1362	PA14_06400	NA	PA14_06400	357.966	-0.0128936	0.100947	-0.127726	0.898366	0.945977	NOT_CHANGE	LysR family transcriptional regulator	Cytoplasmic [Class 3]
1363	PA14_06420	NA	PA14_06420	5775.32	0.457427	0.136139	3.35999	0.00077944	0.00344601	NOT_CHANGE	hypothetical protein	Cytoplasmic [Class 3]
1364	PA14_06430	NA	PA14_06430	1781.24	0.0424527	0.090535	0.468909	0.639135	0.764168	NOT_CHANGE	hypothetical protein	Unknown [Class 3]
1365	PA14_06450	NA	PA14_06450	1746.93	-0.327568	0.111168	-2.94661	0.00321275	0.0119356	NOT_CHANGE	acetyl-CoA carboxylase biotin carboxylase subunit	Cytoplasmic [Class 3]
1366	PA14_06460	NA	PA14_06460	1521.7	-0.213651	0.0625323	-3.41665	0.00063396	0.00286061	NOT_CHANGE	hypothetical protein	Cytoplasmic [Class 3]
1367	PA14_06480	NA	PA14_06480	177.103	-0.107585	0.11394	-0.944223	0.345056	0.503556	NOT_CHANGE	hydrolase	Cytoplasmic [Class 3]
1368	PA14_06530	NA	PA14_06530	406.763	0.0642256	0.0818607	0.784572	0.432705	0.589016	NOT_CHANGE	biotin biosynthesis protein bioH	Cytoplasmic [Class 3]
1369	PA14_06540	NA	PA14_06540	562.848	0.726039	0.158487	4.58106	4.62618e-06	3.10779e-05	NOT_CHANGE	biotin synthesis protein BioC	Cytoplasmic [Class 3]
1370	PA14_06580	NA	PA14_06580	220.657	0.0443544	0.115287	0.384732	0.700436	0.809101	NOT_CHANGE	hypothetical protein	Unknown [Class 3]
1371	PA14_06600	NA	PA14_06600	38.6441	-0.485279	0.231082	-2.10003	0.0357265	0.0894445	NOT_CHANGE	acyl-CoA dehydrogenase	Cytoplasmic [Class 3]
1372	PA14_06620	NA	PA14_06620	993.092	-0.354038	0.0718699	-4.92609	8.38899e-07	6.17685e-06	NOT_CHANGE	acyl-CoA dehydrogenase	Cytoplasmic [Class 3]
1373	PA14_06640	NA	PA14_06640	1009.42	0.00635115	0.0676729	0.0938507	0.925228	0.96208	NOT_CHANGE	acyl-CoA dehydrogenase	Cytoplasmic [Class 3]
1374	PA14_06710	NA	PA14_06710	775.589	-0.0745301	0.0680878	-1.09462	0.273684	0.428525	NOT_CHANGE	transcriptional regulator	Cytoplasmic [Class 3]
1375	PA14_06790	NA	PA14_06790	2025.57	-0.0497139	0.0529845	-0.938271	0.348105	0.506318	NOT_CHANGE	cytochrome c oxidase subunit	Cytoplasmic Membrane [Class 3]
1376	PA14_06800	NA	PA14_06800	439.39	-0.160417	0.123941	-1.2943	0.195564	0.335774	NOT_CHANGE	hypothetical protein	Cytoplasmic Membrane [Class 3]
1377	PA14_06840	NA	PA14_06840	2363.64	-0.10709	0.066154	-1.61881	0.105489	0.208125	NOT_CHANGE	dinitrification protein NorD	Cytoplasmic [Class 3]
1378	PA14_06860	NA	PA14_06860	693.475	0.362635	0.08656	4.1894	2.79693e-05	0.000164237	NOT_CHANGE	hypothetical protein	Cytoplasmic Membrane [Class 3]
1379	PA14_06875	NA	PA14_06875	5340.05	-0.102007	0.0648458	-1.57307	0.115702	0.223926	NOT_CHANGE	rsmYregulatoryRNA
1380	PA14_06880	NA	PA14_06880	168.759	-0.151197	0.129239	-1.1699	0.24204	0.390697	NOT_CHANGE	LysR family transcriptional regulator	Cytoplasmic [Class 3]
1381	PA14_06890	NA	PA14_06890	709.938	-0.0666573	0.0907103	-0.734838	0.462438	0.616079	NOT_CHANGE	hypothetical protein	Cytoplasmic [Class 3]
1382	PA14_06900	NA	PA14_06900	828.707	0.609781	0.0766479	7.95562	1.78234e-15	2.71891e-14	NOT_CHANGE	hypothetical protein	Unknown [Class 3]
1383	PA14_06920	NA	PA14_06920	278.493	-0.687952	0.224405	-3.06567	0.00217181	0.0084757	NOT_CHANGE	class III pyridoxal phosphate-dependent aminotransferase	Cytoplasmic Membrane [Class 3]
1384	PA14_06930	NA	PA14_06930	350.649	0.0631268	0.110553	0.571009	0.567993	0.706861	NOT_CHANGE	glutamine amidotransferase	Cytoplasmic [Class 3]
1385	PA14_06940	NA	PA14_06940	1973.41	-0.109288	0.066	-1.65587	0.0977478	0.196116	NOT_CHANGE	hypothetical protein	Cytoplasmic [Class 3]
1386	PA14_06960	NA	PA14_06960	1364.44	-0.00979281	0.0707862	-0.138343	0.889969	0.940751	NOT_CHANGE	hypothetical protein	Unknown (This protein may have multiple localization sites) [Class 3]
1387	PA14_06970	NA	PA14_06970	551.15	-0.303562	0.101111	-3.00226	0.00267984	0.0101723	NOT_CHANGE	Cro/CI family transcriptional regulator	Cytoplasmic [Class 3]
1388	PA14_06980	NA	PA14_06980	342.007	0.108334	0.129476	0.836714	0.402753	0.559625	NOT_CHANGE	hypothetical protein	Cytoplasmic Membrane [Class 3]
1389	PA14_06990	NA	PA14_06990	476.611	0.065282	0.0979472	0.666501	0.505091	0.653026	NOT_CHANGE	hypothetical protein	Unknown [Class 3]
1390	PA14_07010	NA	PA14_07010	19.331	0.273754	0.353249	0.774961	0.438362	0.593877	NOT_CHANGE	hypothetical protein	Cytoplasmic Membrane [Class 3]
1391	PA14_07020	NA	PA14_07020	2857.41	0.00512329	0.0544918	0.0940194	0.925094	0.96208	NOT_CHANGE	hypothetical protein	Cytoplasmic Membrane [Class 3]
1392	PA14_07030	NA	PA14_07030	1255.15	-0.401982	0.146122	-2.751	0.00594137	0.0202312	NOT_CHANGE	cytochrome c'	Periplasmic [Class 3]
1393	PA14_07040	NA	PA14_07040	626.945	0.037432	0.0811605	0.461209	0.644648	0.767856	NOT_CHANGE	hypothetical protein	Unknown [Class 3]
1394	PA14_07050	NA	PA14_07050	292.109	0.147996	0.110671	1.33726	0.181138	0.316157	NOT_CHANGE	hypothetical protein	Cytoplasmic Membrane [Class 3]
1395	PA14_07060	NA	PA14_07060	723.991	-0.20014	0.0793395	-2.52258	0.0116498	0.0357982	NOT_CHANGE	hypothetical protein	Cytoplasmic [Class 3]
1396	PA14_07070	NA	PA14_07070	719.468	0.10774	0.0726961	1.48206	0.138323	0.258052	NOT_CHANGE	hypothetical protein	Cytoplasmic Membrane [Class 3]
1397	PA14_07110	NA	PA14_07110	44.988	0.239677	0.222458	1.0774	0.2813	0.437216	NOT_CHANGE	ArsR family transcriptional regulator	Cytoplasmic [Class 3]
1398	PA14_07140	NA	PA14_07140	1515.96	0.755526	0.0943234	8.00996	1.14746e-15	1.7646e-14	NOT_CHANGE	hypothetical protein	Cytoplasmic [Class 3]
1399	PA14_07150	NA	PA14_07150	800.701	0.940085	0.0855433	10.9896	4.28919e-28	1.19635e-26	NOT_CHANGE	hypothetical protein	Cytoplasmic [Class 3]
1400	PA14_07200	NA	PA14_07200	2493.34	0.199608	0.0704447	2.83355	0.00460343	0.0161688	NOT_CHANGE	hypothetical protein	Unknown [Class 3]
1401	PA14_07210	NA	PA14_07210	75.3091	-0.109712	0.224115	-0.489533	0.624464	0.751636	NOT_CHANGE	hypothetical protein	Unknown [Class 3]
1402	PA14_07240	NA	PA14_07240	2047.71	-0.156124	0.0838182	-1.86265	0.0625111	0.138941	NOT_CHANGE	hypothetical protein	Unknown [Class 3]
1403	PA14_07250	NA	PA14_07250	969.164	-0.00130186	0.0751277	-0.0173286	0.986174	0.99298	NOT_CHANGE	hypothetical protein	Periplasmic [Class 3]
1404	PA14_07260	NA	PA14_07260	157.902	-0.097834	0.12172	-0.803762	0.421535	0.577681	NOT_CHANGE	hypothetical protein	Cytoplasmic [Class 3]
1405	PA14_07280	NA	PA14_07280	996.508	-0.359425	0.09565	-3.75771	0.000171473	0.000876622	NOT_CHANGE	hypothetical protein	Cytoplasmic [Class 3]
1406	PA14_07290	NA	PA14_07290	1320.02	0.247701	0.0909993	2.72201	0.00648868	0.0218724	NOT_CHANGE	hypothetical protein	Cytoplasmic [Class 3]
1407	PA14_07300	NA	PA14_07300	354.15	0.19961	0.0908401	2.19737	0.0279937	0.0731668	NOT_CHANGE	hypothetical protein	Cytoplasmic Membrane [Class 3]
1408	PA14_07310	NA	PA14_07310	765.449	0.0116726	0.0686363	0.170065	0.864959	0.924595	NOT_CHANGE	hydrolase	Cytoplasmic [Class 3]
1409	PA14_07330	NA	PA14_07330	923.872	0.297588	0.0957237	3.10883	0.00187832	0.00746865	NOT_CHANGE	hypothetical protein	Cytoplasmic Membrane [Class 3]
1410	PA14_07340	NA	PA14_07340	19.6679	-0.0891577	0.313386	-0.284498	0.776029	0.865126	NOT_CHANGE	transcriptional regulator	Cytoplasmic [Class 3]
1411	PA14_07355	NA	PA14_07355	215.162	1.63792	0.160805	10.1858	2.29566e-24	5.46539e-23	NOT_CHANGE	hypothetical protein	Unknown [Class 3]
1412	PA14_07360	NA	PA14_07360	216.718	-0.867199	0.137497	-6.30705	2.84407e-10	3.00237e-09	NOT_CHANGE	hypothetical protein	Cytoplasmic Membrane [Class 3]
1413	PA14_07370	NA	PA14_07370	500.984	0.241969	0.0816205	2.96456	0.00303115	0.0113496	NOT_CHANGE	hypothetical protein	Cytoplasmic Membrane [Class 3]
1414	PA14_07380	NA	PA14_07380	640.772	0.162061	0.0801455	2.02209	0.0431673	0.103857	NOT_CHANGE	hypothetical protein	Cytoplasmic [Class 3]
1415	PA14_07400	NA	PA14_07400	504.41	-0.0327156	0.0879975	-0.371779	0.710057	0.815241	NOT_CHANGE	hypothetical protein	Cytoplasmic [Class 3]
1416	PA14_07410	NA	PA14_07410	696.311	0.0720387	0.0765882	0.940599	0.346911	0.505468	NOT_CHANGE	hypothetical protein	Unknown [Class 3]
1417	PA14_07420	NA	PA14_07420	36.7011	-0.0089075	0.329474	-0.0270355	0.978431	0.987981	NOT_CHANGE	hypothetical protein	Unknown [Class 3]
1418	PA14_07430	NA	PA14_07430	100.999	-0.0689548	0.178162	-0.387035	0.698731	0.80792	NOT_CHANGE	hypothetical protein	Unknown (This protein may have multiple localization sites) [Class 3]
1419	PA14_07440	NA	PA14_07440	2698.42	0.0728413	0.058737	1.24013	0.214928	0.35943	NOT_CHANGE	hypothetical protein	Cytoplasmic Membrane [Class 3]
1420	PA14_07450	NA	PA14_07450	620.938	0.279683	0.113075	2.47343	0.0133824	0.0399507	NOT_CHANGE	hypothetical protein	Cytoplasmic [Class 3]
1421	PA14_07460	NA	PA14_07460	220.445	0.100663	0.10503	0.958423	0.33785	0.496863	NOT_CHANGE	hypothetical protein	Unknown [Class 3]
1422	PA14_07470	NA	PA14_07470	363.322	-0.578591	0.147285	-3.92836	8.55256e-05	0.000462586	NOT_CHANGE	tRNA-Met
1423	PA14_07480	NA	PA14_07480	580.812	-0.0729089	0.0706688	-1.0317	0.302214	0.461053	NOT_CHANGE	reverse transcriptase	Cytoplasmic [Class 3]
1424	PA14_07550	NA	PA14_07550	7.3851	1.88328	0.57659	3.26623	0.0010899	0.00463837	NOT_CHANGE	hypothetical protein	Cytoplasmic [Class 3]
1425	PA14_07580	NA	PA14_07580	793.929	0.929313	0.0925775	10.0382	1.03529e-23	2.36578e-22	NOT_CHANGE	glycerol-3-phosphate acyltransferase PlsY	Cytoplasmic Membrane [Class 3]
1426	PA14_07600	NA	PA14_07600	160.595	-0.0341136	0.120785	-0.282432	0.777612	0.866192	NOT_CHANGE	2-amino-4-hydroxy-6- hydroxymethyldihydropteridine pyrophosphokinase	Cytoplasmic [Class 3]
1427	PA14_07630	NA	PA14_07630	275.907	0.345923	0.0928224	3.72671	0.000193992	0.000975964	NOT_CHANGE	hypothetical protein	Unknown [Class 3]
1428	PA14_07650	NA	PA14_07650	342.604	-0.148116	0.142552	-1.03903	0.298791	0.457144	NOT_CHANGE	SpoVR family protein	Cytoplasmic [Class 3]
1429	PA14_07660	NA	PA14_07660	747.049	0.241662	0.0897088	2.69385	0.00706326	0.0234813	NOT_CHANGE	hypothetical protein	Cytoplasmic [Class 3]
1430	PA14_07680	NA	PA14_07680	36.0378	0.933758	0.297282	3.14098	0.00168383	0.00679986	NOT_CHANGE	hypothetical protein	Cytoplasmic [Class 3]
1431	PA14_07780	NA	PA14_07780	297.579	0.290877	0.130892	2.22226	0.0262655	0.0695442	NOT_CHANGE	hypothetical protein	Cytoplasmic [Class 3]
1432	PA14_07790	NA	PA14_07790	33.7074	-0.347761	0.233204	-1.49123	0.1359	0.254366	NOT_CHANGE	nucleotidyl transferase	Cytoplasmic [Class 3]
1433	PA14_07800	NA	PA14_07800	736.981	-0.0799807	0.106534	-0.75075	0.452803	0.60751	NOT_CHANGE	hypothetical protein	Cytoplasmic Membrane [Class 3]
1434	PA14_07810	NA	PA14_07810	485.215	0.0089063	0.0902943	0.0986364	0.921427	0.960242	NOT_CHANGE	hypothetical protein	Unknown [Class 3]
1435	PA14_07820	NA	PA14_07820	230.999	-0.42177	0.122667	-3.43832	0.000585338	0.00266873	NOT_CHANGE	histidine kinase	Unknown (This protein may have multiple localization sites) [Class 3]
1436	PA14_07840	NA	PA14_07840	461.763	-0.0973575	0.110633	-0.880002	0.378858	0.537984	NOT_CHANGE	two-component response regulator	Cytoplasmic [Class 3]
1437	PA14_07850	NA	PA14_07850	228.124	-0.209804	0.102416	-2.04855	0.0405064	0.0988371	NOT_CHANGE	ABC transporter substrate-binding protein	Periplasmic [Class 3]
1438	PA14_07860	NA	PA14_07860	2054.67	0.0131047	0.0644756	0.20325	0.83894	0.910119	NOT_CHANGE	ABC transporter ATP-binding protein	Cytoplasmic Membrane [Class 3]
1439	PA14_07870	NA	PA14_07870	16.7945	0.260086	0.328633	0.791416	0.428701	0.584266	NOT_CHANGE	ABC transporter substrate-binding protein	Periplasmic [Class 3]
1440	PA14_07890	NA	PA14_07890	980.917	-0.305408	0.0699684	-4.36495	1.27153e-05	7.89846e-05	NOT_CHANGE	ABC transporter permease	Cytoplasmic Membrane [Class 3]
1441	PA14_07900	NA	PA14_07900	359.093	0.416439	0.120558	3.45425	0.000551826	0.00253217	NOT_CHANGE	ABC transporter permease	Cytoplasmic Membrane [Class 3]
1442	PA14_07930	NA	PA14_07930	798.213	-0.0844653	0.0777627	-1.08619	0.277394	0.432548	NOT_CHANGE	phosphoglycolate phosphatase	Cytoplasmic [Class 3]
1443	PA14_07970	NA	PA14_07970	527.913	-0.470454	0.0978709	-4.80689	1.53297e-06	1.09169e-05	NOT_CHANGE	hypothetical protein	Unknown [Class 3]
1444	PA14_07980	NA	PA14_07980	969.633	0.10271	0.0660833	1.55426	0.120123	0.231539	NOT_CHANGE	hypothetical protein	Cytoplasmic [Class 3]
1445	PA14_07990	NA	PA14_07990	13.0266	-0.861866	0.385072	-2.23819	0.0252085	0.0674996	NOT_CHANGE	hypothetical protein	Cytoplasmic Membrane [Class 3]
1446	PA14_08000	NA	PA14_08000	4217.54	-0.0379924	0.0536133	-0.708638	0.478549	0.628415	NOT_CHANGE	hypothetical protein	Unknown [Class 3]
1447	PA14_08010	NA	PA14_08010	241.589	0.0750901	0.113639	0.660778	0.508754	0.656271	NOT_CHANGE	hypothetical protein	Unknown [Class 3]
1448	PA14_08020	NA	PA14_08020	247.43	0.00764147	0.134547	0.0567941	0.954709	0.976337	NOT_CHANGE	bacteriophage protein	Unknown [Class 3]
1449	PA14_08030	NA	PA14_08030	1524.85	0.263129	0.309949	0.848942	0.395913	0.554591	NOT_CHANGE	phage baseplate assembly protein	Cytoplasmic [Class 3]
1450	PA14_08040	NA	PA14_08040	1039.17	-0.354611	0.0722438	-4.90853	9.1762e-07	6.72842e-06	NOT_CHANGE	phage tail protein	Cytoplasmic [Class 3]
1451	PA14_08050	NA	PA14_08050	141.076	-0.197442	0.143003	-1.38068	0.167376	0.298456	NOT_CHANGE	tail fiber protein	Extracellular [Class 3]
1452	PA14_08060	NA	PA14_08060	929.649	0.267901	0.0792723	3.3795	0.000726181	0.00322558	NOT_CHANGE	tail fiber assembly protein	Unknown [Class 3]
1453	PA14_08070	NA	PA14_08070	2495.06	0.00449025	0.064099	0.0700517	0.944152	0.969877	NOT_CHANGE	phage tail sheath protein	Unknown [Class 3]
1454	PA14_08090	NA	PA14_08090	970.682	0.440118	0.151856	2.89825	0.0037525	0.0135825	NOT_CHANGE	phage tail tube protein	Unknown [Class 3]
1455	PA14_08100	NA	PA14_08100	88.5277	0.643965	0.23337	2.75942	0.00579038	0.0197808	NOT_CHANGE	hypothetical protein	Unknown [Class 3]
1456	PA14_08110	NA	PA14_08110	353.849	-0.547433	0.0943658	-5.80118	6.58515e-09	6.08271e-08	NOT_CHANGE	hypothetical protein	Unknown [Class 3]
1457	PA14_08120	NA	PA14_08120	354.808	0.000839557	0.10211	0.00822205	0.99344	0.996702	NOT_CHANGE	tail length determinator protein	Outer Membrane [Class 3]
1458	PA14_08130	NA	PA14_08130	440.331	0.00108832	0.122396	0.00889179	0.992905	0.996408	NOT_CHANGE	hypothetical protein	Unknown [Class 3]
1459	PA14_08140	NA	PA14_08140	18.9277	-0.753724	0.317592	-2.37325	0.0176325	0.0500394	NOT_CHANGE	hypothetical protein	Unknown [Class 3]
1460	PA14_08150	NA	PA14_08150	463.128	0.09142	0.0835376	1.09436	0.273798	0.428526	NOT_CHANGE	phage late control gene D protein	Cytoplasmic [Class 3]
1461	PA14_08160	NA	PA14_08160	236.881	0.123789	0.140725	0.879651	0.379049	0.53812	NOT_CHANGE	lytic enzyme	Unknown [Class 3]
1462	PA14_08180	NA	PA14_08180	557.148	-0.209126	0.0798393	-2.61933	0.0088102	0.0282901	NOT_CHANGE	hypothetical protein	Unknown [Class 3]
1463	PA14_08190	NA	PA14_08190	1339.42	-0.246346	0.0862088	-2.85755	0.00426924	0.015192	NOT_CHANGE	hypothetical protein	Unknown [Class 3]
1464	PA14_08200	NA	PA14_08200	1611.73	0.0653447	0.0640577	1.02009	0.307685	0.467234	NOT_CHANGE	hypothetical protein	Unknown [Class 3]
1465	PA14_08210	NA	PA14_08210	1410.46	0.179391	0.0902036	1.98874	0.0467299	0.110238	NOT_CHANGE	hypothetical protein	Unknown [Class 3]
1466	PA14_08220	NA	PA14_08220	166.783	-0.239245	0.195904	-1.22124	0.221997	0.367483	NOT_CHANGE	hypothetical protein	Cytoplasmic [Class 3]
1467	PA14_08230	NA	PA14_08230	19.6915	-0.348024	0.328181	-1.06047	0.288933	0.445657	NOT_CHANGE	hypothetical protein	Unknown [Class 3]
1468	PA14_08250	NA	PA14_08250	360.626	-0.21258	0.131282	-1.61926	0.105392	0.208005	NOT_CHANGE	hypothetical protein	Unknown [Class 3]
1469	PA14_08260	NA	PA14_08260	347.157	-0.0899256	0.0901988	-0.996971	0.318778	0.47822	NOT_CHANGE	minor tail protein L	Unknown [Class 3]
1470	PA14_08270	NA	PA14_08270	659.368	-0.101895	0.0932982	-1.09214	0.274772	0.429521	NOT_CHANGE	hypothetical protein	Cytoplasmic [Class 3]
1471	PA14_08280	NA	PA14_08280	174.288	-0.0407176	0.117204	-0.347409	0.728284	0.829119	NOT_CHANGE	bacteriophage protein	Cytoplasmic Membrane [Class 3]
1472	PA14_08300	NA	PA14_08300	442.897	-0.920884	0.0908172	-10.14	3.67211e-24	8.59849e-23	NOT_CHANGE	phage-related protein, tail component	Outer Membrane [Class 3]
1473	PA14_08310	NA	PA14_08310	1630.09	-0.21704	0.0725856	-2.99012	0.00278869	0.0105127	NOT_CHANGE	hypothetical protein	Extracellular [Class 3]
1474	PA14_08320	NA	PA14_08320	1138.11	-0.00383506	0.0774972	-0.0494865	0.960532	0.978415	NOT_CHANGE	hypothetical protein	Unknown [Class 3]
1475	PA14_08330	NA	PA14_08330	1500.3	-0.541906	0.085978	-6.30285	2.92228e-10	3.07352e-09	NOT_CHANGE	hypothetical protein	Unknown [Class 3]
1476	PA14_08380	NA	PA14_08380	1066.53	-0.0275693	0.103535	-0.26628	0.790024	0.874559	NOT_CHANGE	hypothetical protein	Cytoplasmic [Class 3]
1477	PA14_08400	NA	PA14_08400	141.702	0.192111	0.134342	1.43001	0.152714	0.278478	NOT_CHANGE	hypothetical protein	Unknown [Class 3]
1478	PA14_08420	NA	PA14_08420	1308.6	0.0176186	0.0658649	0.267496	0.789087	0.873962	NOT_CHANGE	HIT family protein	Cytoplasmic [Class 3]
1479	PA14_08430	NA	PA14_08430	319.394	-0.153183	0.101015	-1.51643	0.129411	0.245859	NOT_CHANGE	ATPase	Cytoplasmic Membrane [Class 3]
1480	PA14_08440	NA	PA14_08440	1636.27	-0.0173337	0.0686634	-0.252444	0.800698	0.882729	NOT_CHANGE	short chain alcohol dehydrogenase	Cytoplasmic [Class 3]
1481	PA14_08450	NA	PA14_08450	1607.86	0.230778	0.082636	2.79271	0.00522691	0.0180797	NOT_CHANGE	hypothetical protein	Cytoplasmic Membrane [Class 3]
1482	PA14_08460	NA	PA14_08460	453.533	-0.147173	0.0784611	-1.87574	0.060691	0.136318	NOT_CHANGE	hypothetical protein	Cytoplasmic [Class 3]
1483	PA14_08470	NA	PA14_08470	471.704	0.983143	0.0906228	10.8487	2.0221e-27	5.47894e-26	NOT_CHANGE	hypothetical protein	Cytoplasmic Membrane [Class 3]
1484	PA14_08490	NA	PA14_08490	932.058	0.42195	0.0728785	5.78977	7.04821e-09	6.45802e-08	NOT_CHANGE	hypothetical protein	Cytoplasmic [Class 3]
1485	PA14_08500	NA	PA14_08500	102.917	0.372766	0.147369	2.52948	0.0114233	0.0352105	NOT_CHANGE	hypothetical protein	Cytoplasmic [Class 3]
1486	PA14_08510	NA	PA14_08510	97.3965	-0.00679685	0.16552	-0.0410636	0.967245	0.981356	NOT_CHANGE	iron-sulfur cluster insertion protein ErpA	Cytoplasmic [Class 3]
1487	PA14_08540	NA	PA14_08540	1443.09	-0.426516	0.0685311	-6.22369	4.85585e-10	5.0236e-09	NOT_CHANGE	hypothetical protein	Unknown [Class 3]
1488	PA14_08630	NA	PA14_08630	834.767	-0.189387	0.0745458	-2.54055	0.0110678	0.0343004	NOT_CHANGE	pantothenate kinase	Cytoplasmic [Class 3]
1489	PA14_08640	NA	PA14_08640	1562.42	0.115678	0.0691169	1.67366	0.0941973	0.190149	NOT_CHANGE	hypothetical protein	Unknown [Class 3]
1490	PA14_08650	NA	PA14_08650	154.722	0.0129465	0.173356	0.0746819	0.940468	0.968604	NOT_CHANGE	tRNA-Tyr
1491	PA14_08690	NA	PA14_08690	221.99	1.84375	0.153902	11.98	4.52168e-33	1.53145e-31	NOT_CHANGE	tRNA-Trp
1492	PA14_09195	NA	PA14_09195	1244.09	0.109704	0.114388	0.95905	0.337534	0.496527	NOT_CHANGE	major facilitator transporter	Cytoplasmic Membrane [Class 3]
1493	PA14_09300	NA	PA14_09300	2056.29	-0.128395	0.0545263	-2.35473	0.0185361	0.0522649	NOT_CHANGE	ABC transporter ATP-binding protein	Cytoplasmic Membrane [Class 3]
1494	PA14_09320	NA	PA14_09320	256.972	0.0172524	0.106921	0.161356	0.871813	0.92878	NOT_CHANGE	ABC transporter ATP-binding protein	Cytoplasmic Membrane [Class 3]
1495	PA14_09350	NA	PA14_09350	713.746	0.415715	0.116462	3.56954	0.000357611	0.00172149	NOT_CHANGE	hypothetical protein	Cytoplasmic Membrane [Class 3]
1496	PA14_09370	NA	PA14_09370	1080.61	0.0632713	0.0878284	0.720398	0.47128	0.623436	NOT_CHANGE	hypothetical protein	Cytoplasmic Membrane [Class 3]
1497	PA14_09380	NA	PA14_09380	45.2325	0.616905	0.234673	2.62878	0.00856912	0.0276251	NOT_CHANGE	transporter	Cytoplasmic Membrane [Class 3]
1498	PA14_09550	NA	PA14_09550	251.855	0.0700309	0.15308	0.457478	0.647328	0.77008	NOT_CHANGE	hypothetical protein	Periplasmic [Class 3]
1499	PA14_09570	NA	PA14_09570	75.9798	0.292622	0.180423	1.62186	0.104832	0.207261	NOT_CHANGE	LysR family transcriptional regulator	Cytoplasmic [Class 3]
1500	PA14_09580	NA	PA14_09580	1399.53	-0.428149	0.0623837	-6.86316	6.73555e-12	8.03465e-11	NOT_CHANGE	hypothetical protein	Cytoplasmic [Class 3]
1501	PA14_09610	NA	PA14_09610	35.5356	1.28934	0.28116	4.58579	4.52279e-06	3.04552e-05	NOT_CHANGE	hypothetical protein	Cytoplasmic [Class 3]
1502	PA14_09630	NA	PA14_09630	367.262	0.0184776	0.10197	0.181206	0.856206	0.918908	NOT_CHANGE	acyl-CoA dehydrogenase	Cytoplasmic [Class 3]
1503	PA14_09680	NA	PA14_09680	1675.34	0.995098	0.0968861	10.2708	9.53983e-25	2.30986e-23	NOT_CHANGE	two-component sensor	Cytoplasmic Membrane [Class 3]
1504	PA14_09690	NA	PA14_09690	1883.39	0.147179	0.0713669	2.06229	0.0391801	0.0961339	NOT_CHANGE	two-component response regulator	Cytoplasmic [Class 3]
1505	PA14_09700	NA	PA14_09700	2016.35	-0.0307245	0.0529812	-0.579913	0.561973	0.702312	NOT_CHANGE	monooxygenase	Cytoplasmic [Class 3]
1506	PA14_09710	NA	PA14_09710	597.005	-0.103924	0.107527	-0.966486	0.333801	0.49282	NOT_CHANGE	aldehyde dehydrogenase	Cytoplasmic [Class 3]
1507	PA14_09730	NA	PA14_09730	2544.29	-1.24743	0.0672576	-18.5471	8.61478e-77	9.42655e-75	NOT_CHANGE	dihydrodipicolinate synthase	Cytoplasmic [Class 3]
1508	PA14_09740	NA	PA14_09740	1150.9	-0.137152	0.0624787	-2.19518	0.0281507	0.0735095	NOT_CHANGE	MFS transporter	Cytoplasmic Membrane [Class 3]
1509	PA14_09750	NA	PA14_09750	0.0983586	0.148207	3.53381	0.0419396	0.966547	0.981356	NOT_CHANGE	oxidoreductase	Cytoplasmic [Class 3]
1510	PA14_09760	NA	PA14_09760	252.604	0.0821967	0.126613	0.649195	0.516213	0.663036	NOT_CHANGE	GntR family transcriptional regulator	Cytoplasmic [Class 3]
1511	PA14_09780	NA	PA14_09780	228.274	-0.716439	0.132852	-5.39276	6.93822e-08	5.84866e-07	NOT_CHANGE	hypothetical protein	Unknown [Class 3]
1512	PA14_09790	NA	PA14_09790	1208.68	0.0703704	0.0753024	0.934505	0.350043	0.50784	NOT_CHANGE	transcriptional regulator	Cytoplasmic [Class 3]
1513	PA14_09810	NA	PA14_09810	1207.14	0.0861043	0.0711242	1.21062	0.226041	0.372262	NOT_CHANGE	hypothetical protein	Unknown [Class 3]
1514	PA14_09820	NA	PA14_09820	1464.79	-0.076768	0.0736833	-1.04186	0.297475	0.455599	NOT_CHANGE	acetolactate synthase	Cytoplasmic [Class 3]
1515	PA14_09850	NA	PA14_09850	26.9447	0.286292	0.286992	0.997561	0.318492	0.47822	NOT_CHANGE	porin	Outer Membrane [Class 3]
1516	PA14_09880	NA	PA14_09880	1599.1	-0.045541	0.0608422	-0.74851	0.454153	0.609033	NOT_CHANGE	hypothetical protein	Unknown [Class 3]
1517	PA14_09910	NA	PA14_09910	2521.23	0.450312	0.379074	1.18793	0.234861	0.382364	NOT_CHANGE	transcriptional regulator	Cytoplasmic [Class 3]
1518	PA14_09920	NA	PA14_09920	21.8261	0.0623332	0.300613	0.207354	0.835734	0.908198	NOT_CHANGE	translation initiation inhibitor	Unknown [Class 3]
1519	PA14_09930	NA	PA14_09930	147.481	-0.474723	0.157901	-3.00646	0.00264312	0.0100463	NOT_CHANGE	exonuclease III	Cytoplasmic [Class 3]
1520	PA14_09940	NA	PA14_09940	95.8343	0.181825	0.145756	1.24746	0.21223	0.356492	NOT_CHANGE	protease	Cytoplasmic [Class 3]
1521	PA14_09950	NA	PA14_09950	27.8201	0.144975	0.263028	0.551176	0.581513	0.717746	NOT_CHANGE	oxidoreductase	Cytoplasmic Membrane [Class 3]
1522	PA14_09960	NA	PA14_09960	127.898	-0.0734233	0.178125	-0.412201	0.680192	0.795267	NOT_CHANGE	hypothetical protein	Unknown [Class 3]
1523	PA14_09990	NA	PA14_09990	1897.53	-0.0108443	0.0681159	-0.159203	0.873509	0.930065	NOT_CHANGE	acetyltransferase	Cytoplasmic [Class 3]
1524	PA14_10010	NA	PA14_10010	727.453	-0.0487761	0.0863635	-0.564777	0.572225	0.709979	NOT_CHANGE	transcriptional regulator	Unknown (This protein may have multiple localization sites) [Class 3]
1525	PA14_10020	NA	PA14_10020	138.715	0.0256912	0.136444	0.188292	0.850648	0.916008	NOT_CHANGE	hypothetical protein	Unknown [Class 3]
1526	PA14_10040	NA	PA14_10040	373.318	1.32569	0.147704	8.97535	2.82443e-19	5.18419e-18	NOT_CHANGE	amidase	Cytoplasmic [Class 3]
1527	PA14_10050	NA	PA14_10050	354.197	0.208505	0.109269	1.90818	0.0563679	0.128526	NOT_CHANGE	hypothetical protein	Unknown [Class 3]
1528	PA14_10070	NA	PA14_10070	1635.9	0.0584208	0.141686	0.412327	0.680099	0.795267	NOT_CHANGE	zinc-dependent oxidoreductase	Cytoplasmic [Class 3]
1529	PA14_10080	NA	PA14_10080	1469.88	-0.0584251	0.0560718	-1.04197	0.297426	0.455599	NOT_CHANGE	hypothetical protein	Unknown [Class 3]
1530	PA14_10090	NA	PA14_10090	424.756	-0.129406	0.0809598	-1.5984	0.109953	0.215216	NOT_CHANGE	LysR family transcriptional regulator	Unknown (This protein may have multiple localization sites) [Class 3]
1531	PA14_10110	NA	PA14_10110	562.882	0.0918637	0.10574	0.868768	0.384974	0.543549	NOT_CHANGE	transporter	Cytoplasmic Membrane [Class 3]
1532	PA14_10120	NA	PA14_10120	523.448	0.028146	0.0834286	0.337366	0.735841	0.834217	NOT_CHANGE	LysR family transcriptional regulator	Cytoplasmic [Class 3]
1533	PA14_10130	NA	PA14_10130	394.647	0.000798573	0.133407	0.00598598	0.995224	0.997193	NOT_CHANGE	short chain dehydrogenase	Cytoplasmic [Class 3]
1534	PA14_10190	NA	PA14_10190	1417.28	-1.1956	0.0763404	-15.6614	2.77704e-55	1.8597e-53	NOT_CHANGE	transcriptional regulator	Unknown [Class 3]
1535	PA14_10200	NA	PA14_10200	991.339	-0.144582	0.0754797	-1.9155	0.0554283	0.126712	NOT_CHANGE	TonB-dependent receptor protein	Outer Membrane [Class 3]
1536	PA14_10210	NA	PA14_10210	507.608	0.0863199	0.118763	0.726828	0.467332	0.620709	NOT_CHANGE	oxidoreductase	Cytoplasmic [Class 3]
1537	PA14_10220	NA	PA14_10220	183.163	-0.274476	0.128966	-2.12828	0.033314	0.0843223	NOT_CHANGE	SH3 domain-containing protein	Unknown [Class 3]
1538	PA14_10240	NA	PA14_10240	186.099	0.104912	0.125209	0.837894	0.40209	0.559496	NOT_CHANGE	branched-chain alpha-keto acid dehydrogenase subunit E2	Cytoplasmic [Class 3]
1539	PA14_10260	NA	PA14_10260	32.3469	0.23666	0.272728	0.86775	0.385531	0.544065	NOT_CHANGE	dehydrogenase E1 component	Cytoplasmic [Class 3]
1540	PA14_10270	NA	PA14_10270	1695.36	-0.477623	0.117481	-4.06554	4.79207e-05	0.000270716	NOT_CHANGE	hypothetical protein	Unknown [Class 3]
1541	PA14_10280	NA	PA14_10280	850.244	0.166905	0.0624587	2.67224	0.00753463	0.0247244	NOT_CHANGE	short-chain dehydrogenase	Cytoplasmic [Class 3]
1542	PA14_10300	NA	PA14_10300	356.726	-0.0125906	0.104893	-0.120032	0.904458	0.949945	NOT_CHANGE	efflux protein	Cytoplasmic Membrane [Class 3]
1543	PA14_10320	NA	PA14_10320	146.587	-0.102442	0.146549	-0.699029	0.484534	0.633502	NOT_CHANGE	transcriptional regulator	Cytoplasmic [Class 3]
1544	PA14_10330	NA	PA14_10330	673.252	-0.0296244	0.0687396	-0.430966	0.666493	0.785327	NOT_CHANGE	outer membrane protein	Outer Membrane [Class 3]
1545	PA14_10340	NA	PA14_10340	669.823	-0.345876	0.117131	-2.9529	0.00314802	0.0117227	NOT_CHANGE	toxin transporter	Cytoplasmic Membrane [Class 3]
1546	PA14_10350	NA	PA14_10350	1019.51	-0.0967216	0.071181	-1.35881	0.174206	0.30755	NOT_CHANGE	secretion protein	Cytoplasmic Membrane [Class 3]
1547	PA14_10360	NA	PA14_10360	736.767	-0.279467	0.0806542	-3.46501	0.000530221	0.00244288	NOT_CHANGE	hypothetical protein	Unknown [Class 3]
1548	PA14_10370	NA	PA14_10370	1558.59	-0.356129	0.111167	-3.20355	0.00135745	0.00565439	NOT_CHANGE	hypothetical protein	Unknown [Class 3]
1549	PA14_10380	NA	PA14_10380	353.094	0.16423	0.0905226	1.81424	0.0696403	0.150438	NOT_CHANGE	hypothetical protein	Unknown [Class 3]
1550	PA14_10400	NA	PA14_10400	19.6128	1.14973	0.427494	2.68947	0.00715665	0.0237304	NOT_CHANGE	hypothetical protein	Unknown [Class 3]
1551	PA14_10410	NA	PA14_10410	2208.69	0.00104093	0.062826	0.0165684	0.986781	0.99324	NOT_CHANGE	hypothetical protein	Unknown [Class 3]
1552	PA14_10440	NA	PA14_10440	310.378	-0.194979	0.120916	-1.61251	0.106851	0.210302	NOT_CHANGE	porin	Outer Membrane [Class 3]
1553	PA14_10470	NA	PA14_10470	2644.5	-0.200291	0.0721247	-2.77701	0.00548607	0.018821	NOT_CHANGE	MFS transporter	Cytoplasmic Membrane [Class 3]
1554	PA14_10480	NA	PA14_10480	51.4927	-1.20662	0.204727	-5.89379	3.77429e-09	3.58526e-08	NOT_CHANGE	transcriptional regulator	Cytoplasmic [Class 3]
1555	PA14_10490	NA	PA14_10490	1110.91	0.0406254	0.119367	0.340339	0.733601	0.833046	NOT_CHANGE	hypothetical protein	Unknown [Class 3]
1556	PA14_10500	NA	PA14_10500	1295.89	0.122553	0.150687	0.813299	0.416046	0.573475	NOT_CHANGE	cbb3-type cytochrome c oxidase subunit I	Cytoplasmic Membrane [Class 3]
1557	PA14_10530	NA	PA14_10530	650.329	-0.107477	0.157616	-0.681891	0.495308	0.643742	NOT_CHANGE	GntR family transcriptional regulator	Cytoplasmic [Class 3]
1558	PA14_10540	NA	PA14_10540	69.0405	0.177511	0.200886	0.883638	0.376892	0.536148	NOT_CHANGE	iron-sulfur cluster-binding protein	Cytoplasmic Membrane [Class 3]
1559	PA14_10550	NA	PA14_10550	1005.73	0.253851	0.113333	2.23987	0.0250995	0.0672709	NOT_CHANGE	sulfite or nitrite reductas	Cytoplasmic [Class 3]
1560	PA14_10560	NA	PA14_10560	725.24	-0.00429252	0.091939	-0.0466888	0.962761	0.98051	NOT_CHANGE	hypothetical protein	Cytoplasmic [Class 3]
1561	PA14_10570	NA	PA14_10570	448.92	-0.0611601	0.092038	-0.664509	0.506364	0.653965	NOT_CHANGE	2,4-dihydroxyhept-2-ene-1,7-dioic acid aldolase	Cytoplasmic [Class 3]
1562	PA14_10600	NA	PA14_10600	171.893	0.00709126	0.13146	0.0539424	0.956981	0.976871	NOT_CHANGE	MFS transporter	Cytoplasmic Membrane [Class 3]
1563	PA14_10640	NA	PA14_10640	194.181	-0.529067	0.140893	-3.75511	0.000173269	0.000884215	NOT_CHANGE	hypothetical protein	Cytoplasmic [Class 3]
1564	PA14_10650	NA	PA14_10650	3175.12	-0.103904	0.0458847	-2.26445	0.0235462	0.0638294	NOT_CHANGE	hypothetical protein	Cytoplasmic [Class 3]
1565	PA14_10660	NA	PA14_10660	255.867	0.409492	0.190858	2.14554	0.0319098	0.0813837	NOT_CHANGE	transcriptional regulator	Cytoplasmic [Class 3]
1566	PA14_10680	NA	PA14_10680	1379.17	-0.211076	0.0774718	-2.72455	0.00643893	0.0217304	NOT_CHANGE	hypothetical protein	Unknown [Class 3]
1567	PA14_10700	NA	PA14_10700	228.225	-0.315363	0.16909	-1.86506	0.0621725	0.138459	NOT_CHANGE	bacteriophytochrome	Cytoplasmic Membrane [Class 3]
1568	PA14_10710	NA	PA14_10710	443.996	-0.3527	0.0841525	-4.1912	2.77483e-05	0.000163107	NOT_CHANGE	hypothetical protein	Cytoplasmic [Class 3]
1569	PA14_10730	NA	PA14_10730	370.549	0.225151	0.107715	2.09024	0.0365961	0.0912098	NOT_CHANGE	hypothetical protein	Cytoplasmic [Class 3]
1570	PA14_10740	NA	PA14_10740	769.079	-0.0300727	0.0926099	-0.324725	0.745389	0.84052	NOT_CHANGE	spermidine acetyltransferase	Unknown [Class 3]
1571	PA14_10750	NA	PA14_10750	1124.42	0.159649	0.0780605	2.0452	0.0408352	0.0994659	NOT_CHANGE	sugar efflux transporter	Cytoplasmic Membrane [Class 3]
1572	PA14_10770	NA	PA14_10770	1902.89	-0.18187	0.0600396	-3.02916	0.00245234	0.0094538	NOT_CHANGE	sensor/response regulator hybrid	Cytoplasmic Membrane [Class 3]
1573	PA14_10780	NA	PA14_10780	2199.27	-0.526511	0.0697774	-7.54557	4.50298e-14	6.20387e-13	NOT_CHANGE	hypothetical protein	Cytoplasmic [Class 3]
1574	PA14_10820	NA	PA14_10820	2514.58	1.20966	0.0688749	17.5631	4.72248e-69	4.47849e-67	NOT_CHANGE	HDIG domain-containing protein	Cytoplasmic [Class 3]
1575	PA14_10830	NA	PA14_10830	289.269	-0.326233	0.103205	-3.16101	0.00157224	0.00641296	NOT_CHANGE	LysR family transcriptional regulator	Cytoplasmic [Class 3]
1576	PA14_10840	NA	PA14_10840	7848.44	1.78554	0.0814103	21.9327	1.26819e-106	2.40533e-104	NOT_CHANGE	dehydrogenase	Cytoplasmic [Class 3]
1577	PA14_10850	NA	PA14_10850	3552.4	0.95943	0.0726657	13.2033	8.39202e-40	3.7016e-38	NOT_CHANGE	dehydrogenase	Cytoplasmic Membrane [Class 3]
1578	PA14_10870	NA	PA14_10870	1439.95	-0.255116	0.116051	-2.19831	0.0279272	0.0730603	NOT_CHANGE	hypothetical protein	Outer Membrane [Class 3]
1579	PA14_10890	NA	PA14_10890	862.96	-0.75249	0.147555	-5.09974	3.40115e-07	2.66564e-06	NOT_CHANGE	short-chain dehydrogenase	Cytoplasmic [Class 3]
1580	PA14_10900	NA	PA14_10900	868.891	-0.275477	0.0911999	-3.02059	0.00252284	0.00967314	NOT_CHANGE	alcohol dehydrogenase	Cytoplasmic [Class 3]
1581	PA14_10910	NA	PA14_10910	813.147	0.252022	0.0984709	2.55935	0.0104867	0.0327855	NOT_CHANGE	major facilitator transporter	Cytoplasmic Membrane [Class 3]
1582	PA14_10920	NA	PA14_10920	667.848	-0.072931	0.0845963	-0.862106	0.388629	0.547894	NOT_CHANGE	hypothetical protein	Unknown [Class 3]
1583	PA14_10940	NA	PA14_10940	667.807	-0.505641	0.096849	-5.22092	1.78034e-07	1.4248e-06	NOT_CHANGE	AraC family transcriptional regulator	Cytoplasmic [Class 3]
1584	PA14_10950	NA	PA14_10950	1222.23	-0.00151068	0.0787935	-0.0191727	0.984703	0.99232	NOT_CHANGE	hypothetical protein	Cytoplasmic [Class 3]
1585	PA14_10970	NA	PA14_10970	44.4166	0.177212	0.250821	0.706526	0.479861	0.62954	NOT_CHANGE	flavodoxin reductase	Cytoplasmic [Class 3]
1586	PA14_11010	NA	PA14_11010	708.645	-1.92689	0.0773104	-24.9241	4.07972e-137	1.28965e-134	NOT_CHANGE	hypothetical protein	Unknown [Class 3]
1587	PA14_11020	NA	PA14_11020	687.407	-0.0991885	0.0712543	-1.39204	0.163912	0.294214	NOT_CHANGE	3-ketoacyl-ACP reductase	Cytoplasmic [Class 3]
1588	PA14_11030	NA	PA14_11030	536.216	-0.506697	0.076736	-6.60312	4.02601e-11	4.53624e-10	NOT_CHANGE	aminotransferase	Cytoplasmic [Class 3]
1589	PA14_11050	NA	PA14_11050	766.919	0.10357	0.0727839	1.42299	0.15474	0.281121	NOT_CHANGE	hypothetical protein	Cytoplasmic [Class 3]
1590	PA14_11120	NA	PA14_11120	901.305	0.181266	0.0730274	2.48216	0.0130589	0.0392112	NOT_CHANGE	response regulator	Cytoplasmic [Class 3]
1591	PA14_11130	NA	PA14_11130	2344.4	1.0917	0.0640089	17.0555	3.18286e-65	2.70306e-63	NOT_CHANGE	short chain dehydrogenase	Extracellular [Class 3]
1592	PA14_11140	NA	PA14_11140	43.3348	-0.0459672	0.229187	-0.200567	0.841037	0.911532	NOT_CHANGE	nonribosomal peptide synthetase	Cytoplasmic [Class 3]
1593	PA14_11150	NA	PA14_11150	1690.65	-0.175483	0.0701963	-2.49988	0.0124234	0.0377209	NOT_CHANGE	transcriptional regulator	Unknown [Class 3]
1594	PA14_11160	NA	PA14_11160	1127.55	0.171889	0.073036	2.35348	0.0185986	0.0523891	NOT_CHANGE	hypothetical protein	Cytoplasmic Membrane [Class 3]
1595	PA14_11170	NA	PA14_11170	68.5462	0.127607	0.195744	0.651907	0.514461	0.661832	NOT_CHANGE	hypothetical protein	Cytoplasmic [Class 3]
1596	PA14_11180	NA	PA14_11180	1254.83	-0.296533	0.0803087	-3.69241	0.00022214	0.00110488	NOT_CHANGE	transcriptional regulator	Cytoplasmic [Class 3]
1597	PA14_11190	NA	PA14_11190	392.025	-0.205079	0.0822365	-2.49377	0.0126395	0.0381938	NOT_CHANGE	aldehyde dehydrogenase	Cytoplasmic [Class 3]
1598	PA14_11210	NA	PA14_11210	829.367	0.0769774	0.0695618	1.1066	0.268465	0.422213	NOT_CHANGE	amino acid permease	Cytoplasmic Membrane [Class 3]
1599	PA14_11230	NA	PA14_11230	363.394	1.16502	0.170496	6.8331	8.30963e-12	9.8095e-11	NOT_CHANGE	hypothetical protein	Unknown [Class 3]
1600	PA14_11240	NA	PA14_11240	34.0888	0.104895	0.24464	0.428775	0.668087	0.786554	NOT_CHANGE	DNA-binding transcriptional activator FeaR	Cytoplasmic [Class 3]
1601	PA14_11250	NA	PA14_11250	62.7943	0.436087	0.189307	2.3036	0.0212451	0.0583702	NOT_CHANGE	hypothetical protein	Cytoplasmic [Class 3]
1602	PA14_11280	NA	PA14_11280	270.805	-0.448619	0.107374	-4.17811	2.93937e-05	0.000171715	NOT_CHANGE	hypothetical protein	Unknown [Class 3]
1603	PA14_11290	NA	PA14_11290	1771.84	0.0279411	0.103341	0.270377	0.78687	0.872413	NOT_CHANGE	permease	Cytoplasmic Membrane [Class 3]
1604	PA14_11310	NA	PA14_11310	76.3259	-0.0227378	0.1685	-0.134943	0.892657	0.942166	NOT_CHANGE	ABC transporter ATP-binding protein	Cytoplasmic Membrane [Class 3]
1605	PA14_11320	NA	PA14_11320	1392.2	-0.124739	0.107032	-1.16543	0.243844	0.393163	NOT_CHANGE	hypothetical protein	Unknown [Class 3]
1606	PA14_11330	NA	PA14_11330	1301.73	-0.334813	0.0609791	-5.49061	4.00545e-08	3.45843e-07	NOT_CHANGE	hypothetical protein	Cytoplasmic [Class 3]
1607	PA14_11340	NA	PA14_11340	1005.47	-0.327926	0.0639187	-5.13037	2.89178e-07	2.28214e-06	NOT_CHANGE	thioredoxin	Cytoplasmic [Class 3]
1608	PA14_11350	NA	PA14_11350	566.39	0.0787033	0.111853	0.703631	0.481663	0.631053	NOT_CHANGE	hypothetical protein	Unknown [Class 3]
1609	PA14_11370	NA	PA14_11370	882.615	0.11087	0.0684373	1.62002	0.105228	0.207754	NOT_CHANGE	lipoprotein	Unknown [Class 3]
1610	PA14_11480	NA	PA14_11480	316.548	-0.604102	0.0928895	-6.50345	7.84991e-11	8.68988e-10	NOT_CHANGE	hypothetical protein	Unknown [Class 3]
1611	PA14_11490	NA	PA14_11490	894.072	0.144978	0.0748596	1.93666	0.0527869	0.121997	NOT_CHANGE	hypothetical protein	Unknown [Class 3]
1612	PA14_11520	NA	PA14_11520	668.669	-0.817847	0.089293	-9.15914	5.23129e-20	9.88905e-19	NOT_CHANGE	hypothetical protein	Cytoplasmic Membrane [Class 3]
1613	PA14_11530	NA	PA14_11530	193.97	3.36755	0.232687	14.4724	1.81029e-47	9.82113e-46	UP	hypothetical protein	Periplasmic [Class 3]
1614	PA14_11580	NA	PA14_11580	852.95	0.379103	0.116626	3.25058	0.0011517	0.00487586	NOT_CHANGE	hypothetical protein	Cytoplasmic [Class 3]
1615	PA14_11590	NA	PA14_11590	947.75	0.000531018	0.0682567	0.00777973	0.993793	0.996702	NOT_CHANGE	hypothetical protein	Unknown [Class 3]
1616	PA14_11600	NA	PA14_11600	640.934	0.0867655	0.0866925	1.00084	0.316903	0.47658	NOT_CHANGE	ABC transporter	Cytoplasmic Membrane [Class 3]
1617	PA14_11610	NA	PA14_11610	329.986	0.819235	0.147522	5.5533	2.80326e-08	2.46531e-07	NOT_CHANGE	ABC transporter permease	Cytoplasmic Membrane [Class 3]
1618	PA14_11620	NA	PA14_11620	115.2	0.937508	0.193147	4.85385	1.21085e-06	8.74331e-06	NOT_CHANGE	ABC transporter	Cytoplasmic [Class 3]
1619	PA14_11630	NA	PA14_11630	739.193	0.0622292	0.0778499	0.799349	0.424088	0.580202	NOT_CHANGE	two-component sensor	Cytoplasmic Membrane [Class 3]
1620	PA14_11650	NA	PA14_11650	328.726	0.997459	0.115596	8.62887	6.19625e-18	1.06195e-16	NOT_CHANGE	hypothetical protein	Unknown (This protein may have multiple localization sites) [Class 3]
1621	PA14_11670	NA	PA14_11670	141.268	-0.174781	0.140556	-1.24349	0.213687	0.358349	NOT_CHANGE	hypothetical protein	Unknown [Class 3]
1622	PA14_11680	NA	PA14_11680	2571.49	0.125835	0.129797	0.969475	0.332308	0.491281	NOT_CHANGE	two-component regulator	Cytoplasmic [Class 3]
1623	PA14_11720	NA	PA14_11720	816.388	1.6111	0.124878	12.9014	4.42017e-38	1.84932e-36	NOT_CHANGE	hypothetical protein	Cytoplasmic Membrane [Class 3]
1624	PA14_11730	NA	PA14_11730	267.019	0.168459	0.112616	1.49587	0.134687	0.252898	NOT_CHANGE	protein kinase	Unknown [Class 3]
1625	PA14_11740	NA	PA14_11740	1491.46	3.12839	0.129029	24.2457	7.34102e-130	1.89865e-127	UP	hypothetical protein	Unknown (This protein may have multiple localization sites) [Class 3]
1626	PA14_11750	NA	PA14_11750	36.1045	-0.431639	0.249755	-1.72825	0.0839433	0.173145	NOT_CHANGE	acetyltransferase	Cytoplasmic [Class 3]
1627	PA14_11760	NA	PA14_11760	1576.82	-0.566978	0.0912028	-6.21667	5.07825e-10	5.24415e-09	NOT_CHANGE	ethanolamine ammonia-lyase small subunit	Cytoplasmic [Class 3]
1628	PA14_11790	NA	PA14_11790	1655.42	0.247709	0.119596	2.07121	0.0383392	0.0946422	NOT_CHANGE	amino acid transporter	Cytoplasmic Membrane [Class 3]
1629	PA14_11830	NA	PA14_11830	979.407	-0.118046	0.0714228	-1.65277	0.098377	0.19717	NOT_CHANGE	transcriptional regulator	Cytoplasmic [Class 3]
1630	PA14_11860	NA	PA14_11860	394.78	0.22853	0.0905427	2.524	0.0116027	0.0356862	NOT_CHANGE	aromatic acid decarboxylase	Cytoplasmic [Class 3]
1631	PA14_11880	NA	PA14_11880	2977.37	-0.721875	0.0839012	-8.60387	7.70703e-18	1.31296e-16	NOT_CHANGE	hypothetical protein	Unknown [Class 3]
1632	PA14_11890	NA	PA14_11890	757.816	-0.254843	0.0755844	-3.37163	0.000747241	0.0033088	NOT_CHANGE	hypothetical protein	Cytoplasmic [Class 3]
1633	PA14_11900	NA	PA14_11900	135.092	0.00650378	0.12555	0.0518024	0.958686	0.977436	NOT_CHANGE	hypothetical protein	Unknown [Class 3]
1634	PA14_11910	NA	PA14_11910	1019.83	-0.161507	0.068875	-2.34493	0.0190308	0.0532114	NOT_CHANGE	hypothetical protein	Cytoplasmic [Class 3]
1635	PA14_11920	NA	PA14_11920	654.799	0.422655	0.139815	3.02295	0.00250321	0.00961734	NOT_CHANGE	hypothetical protein	Cytoplasmic Membrane [Class 3]
1636	PA14_11930	NA	PA14_11930	1353.21	-0.202662	0.080743	-2.50997	0.0120742	0.0368574	NOT_CHANGE	hypothetical protein	Cytoplasmic Membrane [Class 3]
1637	PA14_11940	NA	PA14_11940	63.5692	0.421462	0.203034	2.07582	0.0379109	0.0938699	NOT_CHANGE	hypothetical protein	Cytoplasmic [Class 3]
1638	PA14_11960	NA	PA14_11960	186.214	-0.424397	0.118043	-3.59529	0.000324028	0.00157609	NOT_CHANGE	hypothetical protein	Cytoplasmic Membrane [Class 3]
1639	PA14_11970	NA	PA14_11970	649.829	0.417676	0.12077	3.45845	0.00054329	0.00249534	NOT_CHANGE	3-methyladenine DNA glycosylase	Cytoplasmic [Class 3]
1640	PA14_11980	NA	PA14_11980	290.372	-0.150274	0.121046	-1.24146	0.214436	0.35897	NOT_CHANGE	hypothetical protein	Cytoplasmic [Class 3]
1641	PA14_11990	NA	PA14_11990	1505.88	-0.0203808	0.0585358	-0.348177	0.727708	0.828628	NOT_CHANGE	hydrolase	Cytoplasmic [Class 3]
1642	PA14_12030	NA	PA14_12030	321.01	0.931827	0.123803	7.52666	5.20532e-14	7.13694e-13	NOT_CHANGE	hypothetical protein	Cytoplasmic [Class 3]
1643	PA14_12050	NA	PA14_12050	390.404	1.06142	0.128484	8.26115	1.44274e-16	2.33216e-15	NOT_CHANGE	rRNA large subunit methyltransferase	Cytoplasmic [Class 3]
1644	PA14_12090	NA	PA14_12090	4.71091	0.735125	0.832612	0.882915	0.377282	0.536148	NOT_CHANGE	RlpA family lipoprotein	Periplasmic [Class 3]
1645	PA14_12110	NA	PA14_12110	51.4597	-0.468389	0.208083	-2.25097	0.0243872	0.0657956	NOT_CHANGE	hypothetical protein	Cytoplasmic [Class 3]
1646	PA14_12140	NA	PA14_12140	178.267	1.04963	0.164662	6.37445	1.83621e-10	1.97505e-09	NOT_CHANGE	transcriptional regulator	Cytoplasmic [Class 3]
1647	PA14_12160	NA	PA14_12160	947.99	-0.195622	0.0819267	-2.38777	0.0169511	0.0484571	NOT_CHANGE	murein transglycosylase	Cytoplasmic Membrane [Class 3]
1648	PA14_12170	NA	PA14_12170	739.548	0.0250608	0.0686108	0.365261	0.714917	0.818424	NOT_CHANGE	hypothetical protein	Unknown [Class 3]
1649	PA14_12180	NA	PA14_12180	824.831	-0.132625	0.0982254	-1.35021	0.176949	0.311522	NOT_CHANGE	hypothetical protein	Unknown [Class 3]
1650	PA14_12210	NA	PA14_12210	393.197	0.439952	0.105212	4.18157	2.895e-05	0.000169296	NOT_CHANGE	hypothetical protein	Unknown [Class 3]
1651	PA14_12260	NA	PA14_12260	1230.96	0.37957	0.0740765	5.12403	2.99081e-07	2.35703e-06	NOT_CHANGE	hypothetical protein	Unknown [Class 3]
1652	PA14_12270	NA	PA14_12270	540.754	0.0805198	0.0740438	1.08746	0.276833	0.432029	NOT_CHANGE	hypothetical protein	Cytoplasmic Membrane [Class 3]
1653	PA14_12300	NA	PA14_12300	6041.68	0.0282409	0.0665532	0.424335	0.671322	0.7889	NOT_CHANGE	hypothetical protein	Cytoplasmic Membrane [Class 3]
1654	PA14_12310	NA	PA14_12310	2574.87	-0.285237	0.0842084	-3.38727	0.00070592	0.00314295	NOT_CHANGE	metalloprotease	Cytoplasmic [Class 3]
1655	PA14_12330	NA	PA14_12330	1505.32	0.0327459	0.136592	0.239735	0.810536	0.889431	NOT_CHANGE	hypothetical protein	Cytoplasmic [Class 3]
1656	PA14_12350	NA	PA14_12350	197.804	-0.0619684	0.121198	-0.511297	0.609143	0.74219	NOT_CHANGE	(dimethylallyl)adenosine tRNA methylthiotransferase	Cytoplasmic [Class 3]
1657	PA14_12360	NA	PA14_12360	245.684	0.446273	0.10619	4.2026	2.63869e-05	0.000155587	NOT_CHANGE	hypothetical protein	Cytoplasmic [Class 3]
1658	PA14_12370	NA	PA14_12370	54.126	2.12732	0.23133	9.19604	3.71389e-20	7.09129e-19	UP	hypothetical protein	Unknown [Class 3]
1659	PA14_12430	NA	PA14_12430	11976.4	-0.0263672	0.0432951	-0.609011	0.542517	0.684007	NOT_CHANGE
1660	PA14_12440	NA	PA14_12440	2220.69	-0.038472	0.0936012	-0.411021	0.681057	0.795569	NOT_CHANGE	AcrR family transcriptional regulator	Cytoplasmic [Class 3]
1661	PA14_12450	NA	PA14_12450	408.786	0.178044	0.0890738	1.99884	0.0456261	0.108294	NOT_CHANGE	acyl-CoA dehydrogenase	Cytoplasmic [Class 3]
1662	PA14_12470	NA	PA14_12470	3664.22	-0.137893	0.067623	-2.03915	0.0414353	0.100626	NOT_CHANGE	hypothetical protein	Cytoplasmic [Class 3]
1663	PA14_12490	NA	PA14_12490	842.926	-0.529732	0.0859045	-6.16652	6.98086e-10	7.10574e-09	NOT_CHANGE	AMP nucleosidase	Cytoplasmic [Class 3]
1664	PA14_12530	NA	PA14_12530	12143.4	0.288054	0.0898003	3.20772	0.00133793	0.00558535	NOT_CHANGE	hypothetical protein	Unknown [Class 3]
1665	PA14_12540	NA	PA14_12540	35.2784	-0.154417	0.284756	-0.542278	0.587627	0.722627	NOT_CHANGE	pseudouridine synthase	Cytoplasmic [Class 3]
1666	PA14_12550	NA	PA14_12550	1717.4	-0.253339	0.0731431	-3.46361	0.000532988	0.00245364	NOT_CHANGE	hypothetical protein	Unknown [Class 3]
1667	PA14_12560	NA	PA14_12560	1742.07	0.0169551	0.0497725	0.340652	0.733366	0.833046	NOT_CHANGE	hypothetical protein	Cytoplasmic Membrane [Class 3]
1668	PA14_12570	NA	PA14_12570	3020.17	-0.0337142	0.0678445	-0.496934	0.619235	0.748237	NOT_CHANGE	transcription regulator AsnC	Cytoplasmic [Class 3]
1669	PA14_12590	NA	PA14_12590	1039.58	0.034211	0.0783329	0.436739	0.662301	0.782007	NOT_CHANGE	hypothetical protein	Unknown [Class 3]
1670	PA14_12620	NA	PA14_12620	2481.07	-0.134626	0.0669215	-2.0117	0.0442514	0.105839	NOT_CHANGE	hypothetical protein	Unknown [Class 3]
1671	PA14_12640	NA	PA14_12640	191.769	-0.321549	0.116529	-2.75939	0.00579096	0.0197808	NOT_CHANGE	hypothetical protein	Unknown [Class 3]
1672	PA14_12650	NA	PA14_12650	23.0872	-0.347479	0.369509	-0.940379	0.347023	0.505468	NOT_CHANGE	hypothetical protein	Unknown [Class 3]
1673	PA14_12670	NA	PA14_12670	155.08	-0.16209	0.117296	-1.38189	0.167006	0.29845	NOT_CHANGE	hypothetical protein	Cytoplasmic Membrane [Class 3]
1674	PA14_12680	NA	PA14_12680	1072.14	-0.264584	0.0744352	-3.55456	0.000378616	0.00180884	NOT_CHANGE	short chain dehydrogenase	Cytoplasmic [Class 3]
1675	PA14_12690	NA	PA14_12690	252.258	0.292137	0.117059	2.49564	0.0125731	0.0380334	NOT_CHANGE	hypothetical protein	Unknown [Class 3]
1676	PA14_12700	NA	PA14_12700	483.436	0.104204	0.0816662	1.27597	0.201966	0.343451	NOT_CHANGE	hypothetical protein	Cytoplasmic Membrane [Class 3]
1677	PA14_12710	NA	PA14_12710	635.054	-0.138278	0.0801643	-1.72493	0.0845405	0.174225	NOT_CHANGE	hypothetical protein	Cytoplasmic [Class 3]
1678	PA14_12730	NA	PA14_12730	1083.34	0.602713	0.0651734	9.24784	2.29072e-20	4.41836e-19	NOT_CHANGE	hypothetical protein	Periplasmic [Class 3]
1679	PA14_12750	NA	PA14_12750	673.662	-0.0495386	0.072892	-0.679617	0.496747	0.645465	NOT_CHANGE	hypothetical protein	Unknown [Class 3]
1680	PA14_12760	NA	PA14_12760	517.709	0.667651	0.114265	5.84302	5.1263e-09	4.78174e-08	NOT_CHANGE	ATP-dependent RNA helicase	Cytoplasmic [Class 3]
1681	PA14_12770	NA	PA14_12770	701.356	-0.0550555	0.0758909	-0.725456	0.468172	0.621246	NOT_CHANGE	hypothetical protein	Unknown [Class 3]
1682	PA14_12780	NA	PA14_12780	74.0243	0.262807	0.185422	1.41735	0.156382	0.2832	NOT_CHANGE	two-component response regulator	Cytoplasmic [Class 3]
1683	PA14_12810	NA	PA14_12810	14126.6	0.123279	0.0495057	2.49021	0.0127669	0.0385172	NOT_CHANGE	two-component response regulator	Cytoplasmic Membrane [Class 3]
1684	PA14_12820	NA	PA14_12820	684.1	-0.67222	0.110906	-6.06118	1.35129e-09	1.33718e-08	NOT_CHANGE	two-component sensor	Cytoplasmic Membrane [Class 3]
1685	PA14_12840	NA	PA14_12840	1638.34	0.128749	0.0694784	1.85308	0.0638714	0.141032	NOT_CHANGE	acetyltransferase	Cytoplasmic [Class 3]
1686	PA14_12850	NA	PA14_12850	1.32049	0.102242	1.12548	0.0908426	0.927618	0.9636	NOT_CHANGE	acetyltransferase	Unknown [Class 3]
1687	PA14_12860	NA	PA14_12860	235.304	0.00962104	0.146152	0.0658292	0.947514	0.97159	NOT_CHANGE	hypothetical protein	Cytoplasmic [Class 3]
1688	PA14_12890	NA	PA14_12890	452.173	0.173138	0.0940972	1.83999	0.0657691	0.144377	NOT_CHANGE	hypothetical protein	Cytoplasmic [Class 3]
1689	PA14_12900	NA	PA14_12900	797.216	-0.00983132	0.0957118	-0.102718	0.918187	0.958279	NOT_CHANGE	DNA binding protein	Cytoplasmic [Class 3]
1690	PA14_12910	NA	PA14_12910	17.1112	-0.156639	0.338859	-0.462254	0.643899	0.767479	NOT_CHANGE	hypothetical protein	Unknown [Class 3]
1691	PA14_12920	NA	PA14_12920	2062.29	0.0738707	0.108032	0.683785	0.494111	0.642626	NOT_CHANGE	taurine ABC transporter periplasmic protein	Unknown [Class 3]
1692	PA14_12940	NA	PA14_12940	1191.18	-0.397581	0.127115	-3.12772	0.00176168	0.00706909	NOT_CHANGE	taurine ABC transporter ATP-binding protein	Cytoplasmic Membrane [Class 3]
1693	PA14_12960	NA	PA14_12960	717.408	-0.120039	0.0706832	-1.69827	0.0894575	0.182246	NOT_CHANGE	taurine ABC transporter permease	Cytoplasmic Membrane [Class 3]
1694	PA14_12980	NA	PA14_12980	204.904	0.00676896	0.106157	0.0637637	0.949158	0.972575	NOT_CHANGE	hypothetical protein	Cytoplasmic Membrane [Class 3]
1695	PA14_12990	NA	PA14_12990	552.72	0.0417621	0.0930126	0.448994	0.653436	0.775149	NOT_CHANGE	choline transporter	Cytoplasmic Membrane [Class 3]
1696	PA14_13000	NA	PA14_13000	205.13	0.0553828	0.111796	0.495392	0.620324	0.748916	NOT_CHANGE	transcriptional regulator	Cytoplasmic [Class 3]
1697	PA14_13010	NA	PA14_13010	581.915	-0.124469	0.0816773	-1.52391	0.12753	0.242935	NOT_CHANGE	hypothetical protein	Unknown (This protein may have multiple localization sites) [Class 3]
1698	PA14_13050	NA	PA14_13050	397.397	-0.238666	0.10775	-2.21501	0.0267596	0.0706226	NOT_CHANGE	hypothetical protein	Cytoplasmic Membrane [Class 3]
1699	PA14_13060	NA	PA14_13060	2915.14	-0.203619	0.0759993	-2.67922	0.00737934	0.0243411	NOT_CHANGE	transcriptional regulator	Cytoplasmic [Class 3]
1700	PA14_13070	NA	PA14_13070	233.36	0.108258	0.109983	0.984314	0.324961	0.484516	NOT_CHANGE	MFS family transporter	Cytoplasmic Membrane [Class 3]
1701	PA14_13090	NA	PA14_13090	326.375	0.130227	0.106765	1.21975	0.22256	0.367809	NOT_CHANGE	acyl-CoA thiolase	Cytoplasmic [Class 3]
1702	PA14_13110	NA	PA14_13110	480.19	-0.102634	0.08335	-1.23136	0.218186	0.363006	NOT_CHANGE	long-chain-fatty-acid--CoA ligase	Cytoplasmic [Class 3]
1703	PA14_13130	NA	PA14_13130	1121.43	0.0623459	0.0672796	0.92667	0.354098	0.511895	NOT_CHANGE	hypothetical protein	Outer Membrane [Class 3]
1704	PA14_13140	NA	PA14_13140	276.537	-0.349561	0.10764	-3.24751	0.00116418	0.00492504	NOT_CHANGE	hypothetical protein	Unknown [Class 3]
1705	PA14_13150	NA	PA14_13150	534.267	-0.227795	0.0812003	-2.80534	0.00502631	0.0174815	NOT_CHANGE	transcriptional regulator	Unknown (This protein may have multiple localization sites) [Class 3]
1706	PA14_13170	NA	PA14_13170	2133.18	-0.0873836	0.101171	-0.863721	0.387741	0.546913	NOT_CHANGE	metal transporting P-type ATPase	Cytoplasmic Membrane [Class 3]
1707	PA14_13200	NA	PA14_13200	109.877	-0.1357	0.140299	-0.96722	0.333434	0.492533	NOT_CHANGE	hypothetical protein	Cytoplasmic [Class 3]
1708	PA14_13210	NA	PA14_13210	1400.99	0.107764	0.0786656	1.3699	0.170719	0.302802	NOT_CHANGE	hypothetical protein	Unknown [Class 3]
1709	PA14_13220	NA	PA14_13220	1035.68	-0.00174519	0.0642792	-0.0271502	0.97834	0.987981	NOT_CHANGE	protein-tyrosine-phosphatase	Cytoplasmic [Class 3]
1710	PA14_13290	NA	PA14_13290	63.3416	-0.109485	0.200754	-0.545369	0.5855	0.721415	NOT_CHANGE	protease	Cytoplasmic [Class 3]
1711	PA14_13300	NA	PA14_13300	496.357	0.107499	0.151457	0.709769	0.477847	0.628067	NOT_CHANGE	hypothetical protein	Cytoplasmic [Class 3]
1712	PA14_13320	NA	PA14_13320	2589.91	0.0448276	0.0718038	0.624307	0.532426	0.67706	NOT_CHANGE	hypothetical protein	Unknown [Class 3]
1713	PA14_13330	NA	PA14_13330	2557	1.0295	0.109327	9.41672	4.65377e-21	9.32393e-20	NOT_CHANGE	hypothetical protein	Extracellular [Class 3]
1714	PA14_13340	NA	PA14_13340	522.879	-0.1211	0.0824891	-1.46807	0.142084	0.264289	NOT_CHANGE	extracellular nuclease	Unknown [Class 3]
1715	PA14_13350	NA	PA14_13350	571.956	0.77034	0.0886851	8.68624	3.74649e-18	6.44034e-17	NOT_CHANGE	hypothetical protein	Cytoplasmic [Class 3]
1716	PA14_13360	NA	PA14_13360	412.807	-1.54308	0.156084	-9.88616	4.77995e-23	1.04607e-21	NOT_CHANGE	hypothetical protein	Cytoplasmic [Class 3]
1717	PA14_13370	NA	PA14_13370	3069.9	-0.205587	0.0726382	-2.83028	0.00465069	0.0163147	NOT_CHANGE	hypothetical protein	Cytoplasmic [Class 3]
1718	PA14_13380	NA	PA14_13380	18.614	0.539778	0.312917	1.72499	0.0845292	0.174225	NOT_CHANGE	hypothetical protein	Unknown [Class 3]
1719	PA14_13390	NA	PA14_13390	312.831	-0.131966	0.093942	-1.40476	0.160092	0.288633	NOT_CHANGE	hypothetical protein	Unknown [Class 3]
1720	PA14_13420	NA	PA14_13420	931.723	0.0561659	0.071577	0.784692	0.432634	0.589016	NOT_CHANGE	hypothetical protein	Periplasmic [Class 3]
1721	PA14_13450	NA	PA14_13450	761.735	-0.144056	0.0742539	-1.94004	0.0523747	0.121242	NOT_CHANGE	transmembrane sensor	Unknown (This protein may have multiple localization sites) [Class 3]
1722	PA14_13460	NA	PA14_13460	57.8057	-0.302353	0.210017	-1.43966	0.149963	0.275077	NOT_CHANGE	RNA polymerase sigma factor	Cytoplasmic [Class 3]
1723	PA14_13470	NA	PA14_13470	1434.96	0.00200751	0.0813496	0.0246776	0.980312	0.989178	NOT_CHANGE	AraC family transcriptional regulator	Cytoplasmic [Class 3]
1724	PA14_13490	NA	PA14_13490	1410.89	0.536615	0.143606	3.73672	0.000186436	0.000944631	NOT_CHANGE	hypothetical protein	Cytoplasmic Membrane [Class 3]
1725	PA14_13500	NA	PA14_13500	1972.65	0.063908	0.062556	1.02161	0.306964	0.466264	NOT_CHANGE	2-hydroxyacid dehydrogenase	Cytoplasmic [Class 3]
1726	PA14_13510	NA	PA14_13510	794.609	0.0645146	0.107276	0.601387	0.547582	0.688866	NOT_CHANGE	LysR family transcriptional regulator	Cytoplasmic [Class 3]
1727	PA14_13520	NA	PA14_13520	739.492	-0.12712	0.107929	-1.17781	0.238871	0.386907	NOT_CHANGE	outer membrane protein	Outer Membrane [Class 3]
1728	PA14_13530	NA	PA14_13530	1214.21	-0.0599347	0.0715929	-0.83716	0.402503	0.559496	NOT_CHANGE	outer membrane protein	Cytoplasmic Membrane [Class 3]
1729	PA14_13560	NA	PA14_13560	809.708	-0.00473863	0.0743118	-0.0637669	0.949156	0.972575	NOT_CHANGE	hypothetical protein	Cytoplasmic Membrane [Class 3]
1730	PA14_13580	NA	PA14_13580	1313.43	0.243911	0.14952	1.63129	0.102829	0.204794	NOT_CHANGE	ABC transporter ATP-binding protein	Cytoplasmic Membrane [Class 3]
1731	PA14_13590	NA	PA14_13590	895.242	-0.233035	0.0818777	-2.84613	0.00442536	0.0156691	NOT_CHANGE	ABC transporter permease	Cytoplasmic Membrane [Class 3]
1732	PA14_13600	NA	PA14_13600	340.819	-0.0549495	0.0943908	-0.582149	0.560466	0.700737	NOT_CHANGE	ABC transporter substrate-binding protein	Cytoplasmic Membrane [Class 3]
1733	PA14_13610	NA	PA14_13610	2435.05	2.77025	0.167467	16.542	1.82731e-61	1.46442e-59	UP	ABC transporter permease	Cytoplasmic Membrane [Class 3]
1734	PA14_13630	NA	PA14_13630	367.901	0.191517	0.128675	1.48838	0.13665	0.255348	NOT_CHANGE	hypothetical protein	Cytoplasmic Membrane [Class 3]
1735	PA14_13650	NA	PA14_13650	256.201	-0.11525	0.105213	-1.09539	0.273344	0.428229	NOT_CHANGE	hypothetical protein	Cytoplasmic [Class 3]
1736	PA14_13670	NA	PA14_13670	93.7974	0.359395	0.152749	2.35284	0.0186306	0.0524014	NOT_CHANGE	hypothetical protein	Cytoplasmic Membrane [Class 3]
1737	PA14_13680	NA	PA14_13680	526.537	0.470963	0.130754	3.60191	0.000315894	0.00154022	NOT_CHANGE	short chain dehydrogenase	Cytoplasmic [Class 3]
1738	PA14_13690	NA	PA14_13690	1016.69	-0.0191235	0.0827011	-0.231237	0.817131	0.893442	NOT_CHANGE	methyltransferase	Cytoplasmic [Class 3]
1739	PA14_13710	NA	PA14_13710	901.302	0.102688	0.0758423	1.35396	0.175748	0.309749	NOT_CHANGE	hypothetical protein	Unknown [Class 3]
1740	PA14_13720	NA	PA14_13720	418.728	-0.205902	0.147728	-1.39379	0.16338	0.293537	NOT_CHANGE	hypothetical protein	Cytoplasmic [Class 3]
1741	PA14_13840	NA	PA14_13840	2970.53	0.232828	0.0608026	3.82924	0.000128539	0.000671291	NOT_CHANGE	peptidyl-prolyl cis-trans isomerase, PpiC-type	Unknown (This protein may have multiple localization sites) [Class 3]
1742	PA14_13860	NA	PA14_13860	315.662	-0.00532786	0.0997844	-0.0533937	0.957418	0.976871	NOT_CHANGE	hypothetical protein	Unknown [Class 3]
1743	PA14_13870	NA	PA14_13870	1876.41	-0.151733	0.064033	-2.36961	0.0178068	0.0504837	NOT_CHANGE	hypothetical protein	Cytoplasmic [Class 3]
1744	PA14_13880	NA	PA14_13880	634.147	0.359414	0.0844281	4.25704	2.07147e-05	0.000124201	NOT_CHANGE	hypothetical protein	Unknown [Class 3]
1745	PA14_13890	NA	PA14_13890	1100.7	-0.00967	0.0932938	-0.103651	0.917446	0.958199	NOT_CHANGE	integrase	Cytoplasmic [Class 3]
1746	PA14_13900	NA	PA14_13900	1358.46	0.12446	0.0635097	1.9597	0.0500305	0.116622	NOT_CHANGE
1747	PA14_13910	NA	PA14_13910	1459.76	0.113803	0.083463	1.36351	0.172722	0.305308	NOT_CHANGE
1748	PA14_13920	NA	PA14_13920	734.253	0.168923	0.0817924	2.06526	0.0388982	0.0956485	NOT_CHANGE	hypothetical protein	Unknown [Class 3]
1749	PA14_13940	NA	PA14_13940	2098.23	-0.160075	0.0641983	-2.49344	0.0126511	0.0382083	NOT_CHANGE	S-type pyocin protein	Extracellular [Class 3]
1750	PA14_13950	NA	PA14_13950	1078.97	0.229953	0.077642	2.96171	0.00305932	0.0114448	NOT_CHANGE	hypothetical protein	Unknown [Class 3]
1751	PA14_13960	NA	PA14_13960	562.313	0.346209	0.100083	3.45923	0.00054172	0.00249182	NOT_CHANGE	hypothetical protein	Unknown [Class 3]
1752	PA14_13970	NA	PA14_13970	3491.75	-0.0750395	0.065917	-1.13839	0.254956	0.405677	NOT_CHANGE	hypothetical protein	Unknown [Class 3]
1753	PA14_13990	NA	PA14_13990	1423.65	0.988477	0.136325	7.25086	4.14121e-13	5.25971e-12	NOT_CHANGE	amino acid ABC transporter	Periplasmic [Class 3]
1754	PA14_14000	NA	PA14_14000	2751.59	-0.0802687	0.0546118	-1.46981	0.141614	0.263576	NOT_CHANGE	hypothetical protein	Unknown [Class 3]
1755	PA14_14010	NA	PA14_14010	624.142	-0.172945	0.0999666	-1.73003	0.083625	0.172714	NOT_CHANGE	amino acid oxidase	Cytoplasmic [Class 3]
1756	PA14_14020	NA	PA14_14020	358.746	0.440538	0.144447	3.04983	0.00228973	0.00888716	NOT_CHANGE	hypothetical protein	Cytoplasmic [Class 3]
1757	PA14_14060	NA	PA14_14060	1497.67	0.225271	0.0869168	2.5918	0.00954758	0.0301642	NOT_CHANGE	AMP-binding protein	Cytoplasmic [Class 3]
1758	PA14_14080	NA	PA14_14080	1020.77	-0.171744	0.0679896	-2.52604	0.0115358	0.0354995	NOT_CHANGE	carboxylesterase	Unknown [Class 3]
1759	PA14_14100	NA	PA14_14100	132.23	-1.76406	0.144245	-12.2296	2.15936e-34	7.77643e-33	NOT_CHANGE	amino acid-binding protein	Periplasmic [Class 3]
1760	PA14_14130	NA	PA14_14130	858.598	-0.258033	0.117685	-2.19258	0.0283377	0.0738625	NOT_CHANGE	hypothetical protein	Unknown [Class 3]
1761	PA14_14140	NA	PA14_14140	67.463	-0.0935105	0.177575	-0.526597	0.598474	0.731697	NOT_CHANGE	hypothetical protein	Cytoplasmic [Class 3]
1762	PA14_14150	NA	PA14_14150	1464.32	0.57067	0.306739	1.86044	0.0628235	0.139472	NOT_CHANGE	GIY-YIG nuclease superfamily protein	Unknown [Class 3]
1763	PA14_14160	NA	PA14_14160	526.422	0.0752042	0.0891627	0.84345	0.398977	0.556779	NOT_CHANGE	acetyltransferase	Cytoplasmic [Class 3]
1764	PA14_14170	NA	PA14_14170	358.478	0.0402579	0.0939688	0.428417	0.668348	0.786686	NOT_CHANGE	hypothetical protein	Periplasmic [Class 3]
1765	PA14_14210	NA	PA14_14210	113.752	-0.0602095	0.160618	-0.374862	0.707763	0.813406	NOT_CHANGE	hypothetical protein	Unknown [Class 3]
1766	PA14_14220	NA	PA14_14220	475.039	0.304271	0.0903904	3.36618	0.000762163	0.00337225	NOT_CHANGE	nucleoid-associated protein NdpA	Cytoplasmic [Class 3]
1767	PA14_14230	NA	PA14_14230	81.9869	-0.313172	0.157384	-1.98985	0.0466071	0.110176	NOT_CHANGE	hypothetical protein	Cytoplasmic [Class 3]
1768	PA14_14250	NA	PA14_14250	262.366	-0.139444	0.130255	-1.07054	0.284375	0.440537	NOT_CHANGE	hypothetical protein	Unknown [Class 3]
1769	PA14_14270	NA	PA14_14270	369.417	-0.178087	0.123133	-1.4463	0.148093	0.272525	NOT_CHANGE	isochorismatase family hydrolase	Cytoplasmic [Class 3]
1770	PA14_14280	NA	PA14_14280	53.7287	0.0315297	0.212168	0.148607	0.881864	0.935983	NOT_CHANGE	LysR family transcriptional regulator	Cytoplasmic [Class 3]
1771	PA14_14290	NA	PA14_14290	993.568	-0.1444	0.0623532	-2.31583	0.0205674	0.0566449	NOT_CHANGE	hypothetical protein	Cytoplasmic Membrane [Class 3]
1772	PA14_14300	NA	PA14_14300	1748.29	0.154757	0.0932393	1.65979	0.0969577	0.194668	NOT_CHANGE	zinc-binding oxidoreductase	Cytoplasmic [Class 3]
1773	PA14_14310	NA	PA14_14310	777.618	0.116726	0.0959814	1.21613	0.223935	0.369438	NOT_CHANGE	transcriptional regulator	Unknown [Class 3]
1774	PA14_14320	NA	PA14_14320	55.3586	0.207189	0.194123	1.06731	0.285833	0.442162	NOT_CHANGE	hypothetical protein	Cytoplasmic Membrane [Class 3]
1775	PA14_14330	NA	PA14_14330	100.286	0.16848	0.142639	1.18116	0.237539	0.385839	NOT_CHANGE	chaperone	Cytoplasmic [Class 3]
1776	PA14_14340	NA	PA14_14340	1504.44	-0.080048	0.065427	-1.22347	0.221152	0.366654	NOT_CHANGE	SAM-dependent methyltransferase	Cytoplasmic [Class 3]
1777	PA14_14360	NA	PA14_14360	292.349	0.148916	0.138034	1.07883	0.280662	0.436688	NOT_CHANGE	sodium:sulfate symporter	Cytoplasmic Membrane [Class 3]
1778	PA14_14370	NA	PA14_14370	863.579	-0.080273	0.085695	-0.936729	0.348898	0.506953	NOT_CHANGE	ABC-transporter ATP-binding component	Cytoplasmic Membrane [Class 3]
1779	PA14_14380	NA	PA14_14380	1397.08	0.0960863	0.0754566	1.2734	0.202877	0.344382	NOT_CHANGE	ABC transporter permease	Cytoplasmic Membrane [Class 3]
1780	PA14_14390	NA	PA14_14390	117.03	0.102918	0.138858	0.741177	0.458586	0.612712	NOT_CHANGE	ABC-type transport protein, periplasmic c	Unknown [Class 3]
1781	PA14_14420	NA	PA14_14420	747.177	0.000757577	0.0736993	0.0102793	0.991798	0.995648	NOT_CHANGE	hypothetical protein	Cytoplasmic Membrane [Class 3]
1782	PA14_14430	NA	PA14_14430	330.486	-0.0725737	0.144922	-0.500779	0.616527	0.746868	NOT_CHANGE	hypothetical protein	Unknown [Class 3]
1783	PA14_14450	NA	PA14_14450	996.232	0.396515	0.162476	2.44045	0.014669	0.0432023	NOT_CHANGE	hypothetical protein	Unknown [Class 3]
1784	PA14_14480	NA	PA14_14480	1881.32	0.0478063	0.0660487	0.723804	0.469186	0.622011	NOT_CHANGE	transcriptional regulator	Cytoplasmic [Class 3]
1785	PA14_14490	NA	PA14_14490	880.006	-0.484127	0.0784263	-6.17301	6.70009e-10	6.84443e-09	NOT_CHANGE	hydrolase	Cytoplasmic [Class 3]
1786	PA14_14500	NA	PA14_14500	0.431726	1.9218	2.05586	0.934792	0.349896	0.507755	NOT_CHANGE	hypothetical protein	Cytoplasmic Membrane [Class 3]
1787	PA14_14510	NA	PA14_14510	668.102	0.341999	0.082136	4.16381	3.12979e-05	0.000182091	NOT_CHANGE	hypothetical protein	Cytoplasmic Membrane [Class 3]
1788	PA14_14520	NA	PA14_14520	402.388	0.808613	0.0970444	8.3324	7.92183e-17	1.299e-15	NOT_CHANGE	hypothetical protein	Cytoplasmic Membrane [Class 3]
1789	PA14_14530	NA	PA14_14530	1167.09	-0.0996314	0.0818773	-1.21684	0.223666	0.369315	NOT_CHANGE	hypothetical protein	Cytoplasmic Membrane [Class 3]
1790	PA14_14540	NA	PA14_14540	1154.72	0.228839	0.0622281	3.67742	0.000235608	0.00116981	NOT_CHANGE	hypothetical protein	Unknown [Class 3]
1791	PA14_14550	NA	PA14_14550	398.464	0.24104	0.14756	1.6335	0.102363	0.204009	NOT_CHANGE	hypothetical protein	Unknown [Class 3]
1792	PA14_14560	NA	PA14_14560	694.582	0.0532121	0.0852347	0.624301	0.53243	0.67706	NOT_CHANGE	hypothetical protein	Unknown [Class 3]
1793	PA14_14570	NA	PA14_14570	2205.05	2.77665	0.262325	10.5848	3.50642e-26	9.19426e-25	UP	tRNA-Leu
1794	PA14_14660	NA	PA14_14660	930.281	-0.382249	0.087054	-4.39094	1.1286e-05	7.1037e-05	NOT_CHANGE	hypothetical protein	Unknown [Class 3]
1795	PA14_14680	NA	PA14_14680	294.271	2.25147	0.154469	14.5755	4.01956e-48	2.28713e-46	UP	extragenic suppressor protein SuhB	Cytoplasmic [Class 3]
1796	PA14_14690	NA	PA14_14690	594.548	-1.13159	0.102269	-11.0648	1.85823e-28	5.28665e-27	NOT_CHANGE	methyltransferase	Cytoplasmic [Class 3]
1797	PA14_14710	NA	PA14_14710	129.835	-0.565196	0.171143	-3.30249	0.000958309	0.00414345	NOT_CHANGE	Rrf2 family protein	Unknown [Class 3]
1798	PA14_14740	NA	PA14_14740	0.102876	0.148207	3.53381	0.0419396	0.966547	0.981356	NOT_CHANGE	scaffold protein	Cytoplasmic [Class 3]
1799	PA14_14750	NA	PA14_14750	259.84	-1.48522	0.132718	-11.1908	4.52184e-29	1.29946e-27	NOT_CHANGE	iron-binding protein IscA	Cytoplasmic [Class 3]
1800	PA14_14810	NA	PA14_14810	1121.15	-0.951835	0.0862691	-11.0333	2.63928e-28	7.43439e-27	NOT_CHANGE	hypothetical protein	Unknown [Class 3]
1801	PA14_14830	NA	PA14_14830	498.114	0.219711	0.0898949	2.44409	0.014522	0.0427914	NOT_CHANGE	hypothetical protein	Cytoplasmic [Class 3]
1802	PA14_14860	NA	PA14_14860	2.91751	2.08307	1.00804	2.06645	0.0387859	0.0954628	NOT_CHANGE	hypothetical protein	Unknown [Class 3]
1803	PA14_14900	NA	PA14_14900	0.687538	1.69803	1.68433	1.00814	0.313388	0.473368	NOT_CHANGE	hypothetical protein	Unknown [Class 3]
1804	PA14_14940	NA	PA14_14940	50.7295	-1.59407	0.244787	-6.51207	7.41218e-11	8.26967e-10	NOT_CHANGE	aminotransferase	Cytoplasmic [Class 3]
1805	PA14_14960	NA	PA14_14960	1052.58	0.114651	0.0600772	1.9084	0.0563401	0.128526	NOT_CHANGE	hypothetical protein	Cytoplasmic [Class 3]
1806	PA14_14975	NA	PA14_14975	1724.18	0.502954	0.0609178	8.25627	1.50298e-16	2.42265e-15	NOT_CHANGE	hypothetical protein	Cytoplasmic Membrane [Class 3]
1807	PA14_14990	NA	PA14_14990	1367.48	0.0281932	0.192759	0.146262	0.883715	0.936121	NOT_CHANGE	oxidoreductase	Cytoplasmic [Class 3]
1808	PA14_15000	NA	PA14_15000	707.662	-0.138358	0.101237	-1.36667	0.171728	0.304213	NOT_CHANGE	hypothetical protein	Cytoplasmic Membrane [Class 3]
1809	PA14_15020	NA	PA14_15020	1665.39	-0.212211	0.107232	-1.979	0.0478159	0.112514	NOT_CHANGE	hypothetical protein	Unknown [Class 3]
1810	PA14_15050	NA	PA14_15050	203.888	0.170512	0.13947	1.22257	0.221493	0.367005	NOT_CHANGE	hypothetical protein	Cytoplasmic Membrane [Class 3]
1811	PA14_15080	NA	PA14_15080	844.809	0.127544	0.0897063	1.4218	0.155085	0.281478	NOT_CHANGE	hypothetical protein	Cytoplasmic Membrane [Class 3]
1812	PA14_15090	NA	PA14_15090	830.71	1.5422	0.121888	12.6526	1.08243e-36	4.3993e-35	NOT_CHANGE	hypothetical protein	Cytoplasmic Membrane [Class 3]
1813	PA14_15100	NA	PA14_15100	1017.69	0.147013	0.081604	1.80154	0.0716178	0.153602	NOT_CHANGE	hypothetical protein	Unknown [Class 3]
1814	PA14_15110	NA	PA14_15110	205.076	-0.086197	0.11653	-0.739695	0.459485	0.613437	NOT_CHANGE	hypothetical protein	Cytoplasmic Membrane [Class 3]
1815	PA14_15120	NA	PA14_15120	276.505	-0.109297	0.143404	-0.762159	0.445965	0.600709	NOT_CHANGE	hypothetical protein	Unknown [Class 3]
1816	PA14_15130	NA	PA14_15130	89.6064	-0.219669	0.183208	-1.19901	0.230523	0.377495	NOT_CHANGE	hypothetical protein	Unknown [Class 3]
1817	PA14_15140	NA	PA14_15140	331.917	0.284765	0.191092	1.4902	0.136171	0.254705	NOT_CHANGE	hypothetical protein	Unknown [Class 3]
1818	PA14_15150	NA	PA14_15150	1477.25	-0.151537	0.0817765	-1.85306	0.0638736	0.141032	NOT_CHANGE	transcriptional regulator	Cytoplasmic Membrane [Class 3]
1819	PA14_15160	NA	PA14_15160	186.578	0.0182926	0.209882	0.0871563	0.930547	0.964798	NOT_CHANGE	hypothetical protein	Unknown [Class 3]
1820	PA14_15180	NA	PA14_15180	71.2709	-0.0505783	0.194757	-0.259699	0.795096	0.878124	NOT_CHANGE	transporter	Cytoplasmic Membrane [Class 3]
1821	PA14_15190	NA	PA14_15190	1.2322	-0.460766	1.33132	-0.346098	0.729269	0.829908	NOT_CHANGE	hypothetical protein	Cytoplasmic Membrane [Class 3]
1822	PA14_15200	NA	PA14_15200	554.562	-0.10777	0.0834801	-1.29096	0.196716	0.336989	NOT_CHANGE	hypothetical protein	Periplasmic [Class 3]
1823	PA14_15210	NA	PA14_15210	3478.09	0.103262	0.113998	0.905826	0.365028	0.523965	NOT_CHANGE	LysR family transcriptional regulator	Cytoplasmic [Class 3]
1824	PA14_15240	NA	PA14_15240	909.497	0.124298	0.0638107	1.94792	0.0514241	0.119235	NOT_CHANGE	LysR family transcriptional regulator	Cytoplasmic [Class 3]
1825	PA14_15250	NA	PA14_15250	8749.91	-0.148568	0.0504864	-2.94274	0.00325322	0.012067	NOT_CHANGE	hypothetical protein	Cytoplasmic Membrane [Class 3]
1826	PA14_15260	NA	PA14_15260	111.326	0.0820076	0.153366	0.534719	0.592844	0.726687	NOT_CHANGE	acetylpolyamine aminohydrolase	Cytoplasmic [Class 3]
1827	PA14_15270	NA	PA14_15270	329.955	0.177928	0.10138	1.75506	0.0792496	0.165966	NOT_CHANGE	hypothetical protein	Cytoplasmic Membrane [Class 3]
1828	PA14_15280	NA	PA14_15280	1504.48	-0.290781	0.0654317	-4.44403	8.82879e-06	5.67637e-05	NOT_CHANGE	hypothetical protein	Unknown [Class 3]
1829	PA14_15290	NA	PA14_15290	156.941	-0.0181046	0.135537	-0.133577	0.893737	0.942782	NOT_CHANGE	transcriptional regulator	Unknown [Class 3]
1830	PA14_15350	NA	PA14_15350	69.9899	-0.0979041	0.180378	-0.542771	0.587288	0.722627	NOT_CHANGE	integrase	Unknown [Class 3]
1831	PA14_15360	NA	PA14_15360	601.569	-0.0115758	0.09886	-0.117093	0.906786	0.951715	NOT_CHANGE	hypothetical protein	Unknown [Class 3]
1832	PA14_15370	NA	PA14_15370	1298.62	0.240121	0.0656069	3.66	0.00025222	0.00124794	NOT_CHANGE	hypothetical protein	Unknown [Class 3]
1833	PA14_15400	NA	PA14_15400	1368.31	-0.0673168	0.0855687	-0.786699	0.431458	0.587741	NOT_CHANGE	replication protein, RepC	Cytoplasmic [Class 3]
1834	PA14_15410	NA	PA14_15410	4649.51	1.91434	0.157297	12.1702	4.47882e-34	1.6028e-32	NOT_CHANGE
1835	PA14_15420	NA	PA14_15420	58.7189	-0.204618	0.190784	-1.07251	0.283491	0.439407	NOT_CHANGE
1836	PA14_15430	NA	PA14_15430	759.964	0.285735	0.135747	2.10491	0.0352995	0.0885991	NOT_CHANGE	resolvase, essential for transposition	Cytoplasmic [Class 3]
1837	PA14_15435	NA	PA14_15435	208.955	0.0407313	0.119555	0.340691	0.733337	0.833046	NOT_CHANGE	hypothetical protein	Cytoplasmic Membrane [Class 3]
1838	PA14_15490	NA	PA14_15490	747.102	-0.0254919	0.0782045	-0.325965	0.744451	0.840287	NOT_CHANGE	hypothetical protein	Cytoplasmic Membrane [Class 3]
1839	PA14_15500	NA	PA14_15500	3706.98	-0.160429	0.0765821	-2.09487	0.0361829	0.0902985	NOT_CHANGE	oriT-binding protein, TraK	Unknown [Class 3]
1840	PA14_15530	NA	PA14_15530	748.765	-0.396969	0.118353	-3.3541	0.00079623	0.00350662	NOT_CHANGE	entry/exclusion protein TrbK	Unknown [Class 3]
1841	PA14_15540	NA	PA14_15540	571.664	-0.115508	0.0930064	-1.24194	0.214259	0.358779	NOT_CHANGE	mating pair formation protein TrbL	Cytoplasmic Membrane [Class 3]
1842	PA14_15560	NA	PA14_15560	2611.64	0.0488128	0.0534802	0.912727	0.361386	0.520059	NOT_CHANGE	hypothetical protein	Unknown [Class 3]
1843	PA14_15570	NA	PA14_15570	7000.35	0.237946	0.0662214	3.59319	0.000326655	0.00158589	NOT_CHANGE	hypothetical protein	Unknown [Class 3]
1844	PA14_15580	NA	PA14_15580	38.8425	0.43092	0.252669	1.70547	0.0881068	0.180139	NOT_CHANGE	Type II restriction enzyme, methylase subunit	Cytoplasmic [Class 3]
1845	PA14_15590	NA	PA14_15590	4420.51	-0.299209	0.0764882	-3.91183	9.15996e-05	0.0004917	NOT_CHANGE	hypothetical protein	Cytoplasmic [Class 3]
1846	PA14_15600	NA	PA14_15600	142.216	0.339228	0.17639	1.92317	0.0544585	0.124947	NOT_CHANGE	hypothetical protein	Cytoplasmic [Class 3]
1847	PA14_15610	NA	PA14_15610	3380.04	-0.169872	0.0608523	-2.79154	0.00524572	0.0181227	NOT_CHANGE	hypothetical protein	Cytoplasmic [Class 3]
1848	PA14_15620	NA	PA14_15620	2052.26	0.170147	0.0883739	1.92531	0.0541907	0.124433	NOT_CHANGE	oxidoreductase	Cytoplasmic [Class 3]
1849	PA14_15630	NA	PA14_15630	40.1134	1.14072	0.239558	4.76177	1.91905e-06	1.34974e-05	NOT_CHANGE	hypothetical protein	Cytoplasmic Membrane [Class 3]
1850	PA14_15650	NA	PA14_15650	774.526	-0.254143	0.0953081	-2.66654	0.00766361	0.0250897	NOT_CHANGE	hypothetical protein	Unknown [Class 3]
1851	PA14_15660	NA	PA14_15660	450.403	-0.154611	0.101568	-1.52224	0.127949	0.243407	NOT_CHANGE	oxidoreductase	Cytoplasmic [Class 3]
1852	PA14_15670	NA	PA14_15670	486.137	-1.38322	0.215665	-6.41375	1.41987e-10	1.54181e-09	NOT_CHANGE	metallo-oxidoreductase	Unknown (This protein may have multiple localization sites) [Class 3]
1853	PA14_15680	NA	PA14_15680	361.565	0.11709	0.0854379	1.37047	0.17054	0.302615	NOT_CHANGE	hypothetical protein	Cytoplasmic [Class 3]
1854	PA14_15700	NA	PA14_15700	1023.19	-0.0203228	0.0652277	-0.311568	0.755369	0.847883	NOT_CHANGE	amino acid permease	Cytoplasmic Membrane [Class 3]
1855	PA14_15710	NA	PA14_15710	538.409	0.130492	0.121283	1.07593	0.281957	0.437864	NOT_CHANGE	hypothetical protein	Unknown [Class 3]
1856	PA14_15720	NA	PA14_15720	278.904	-0.0652485	0.105679	-0.617421	0.536957	0.680198	NOT_CHANGE	transglycosylase	Cytoplasmic [Class 3]
1857	PA14_15750	NA	PA14_15750	157.415	-0.0131436	0.175913	-0.0747166	0.94044	0.968604	NOT_CHANGE	hypothetical protein	Unknown [Class 3]
1858	PA14_15770	NA	PA14_15770	521.145	-0.141187	0.108704	-1.29882	0.194005	0.333602	NOT_CHANGE	hypothetical protein	Unknown [Class 3]
1859	PA14_15780	NA	PA14_15780	791.352	0.173306	0.0753184	2.30098	0.021393	0.0587481	NOT_CHANGE	PTS system N-acetylglucosamine-specific IIBC component	Cytoplasmic Membrane [Class 3]
1860	PA14_15790	NA	PA14_15790	6.73719	0.505207	0.539147	0.93705	0.348733	0.506843	NOT_CHANGE	phosphoenolpyruvate-protein phosphotransferase	Cytoplasmic [Class 3]
1861	PA14_15810	NA	PA14_15810	3078.9	0.837015	0.106524	7.85754	3.91763e-15	5.92849e-14	NOT_CHANGE	aminotransferase	Cytoplasmic [Class 3]
1862	PA14_15820	NA	PA14_15820	20.4443	-0.280568	0.31252	-0.897762	0.369313	0.528781	NOT_CHANGE	N-acetylglucosamine-6-phosphate deacetylase	Cytoplasmic [Class 3]
1863	PA14_15830	NA	PA14_15830	1712.28	-0.367064	0.0633346	-5.79564	6.80603e-09	6.2664e-08	NOT_CHANGE	GntR family transcriptional regulator	Cytoplasmic [Class 3]
1864	PA14_15840	NA	PA14_15840	374.674	-0.197456	0.116197	-1.69932	0.0892583	0.181971	NOT_CHANGE	hypothetical protein	Unknown [Class 3]
1865	PA14_15850	NA	PA14_15850	23.0295	-0.307495	0.309585	-0.993249	0.320589	0.480166	NOT_CHANGE	hypothetical protein	Cytoplasmic [Class 3]
1866	PA14_15860	NA	PA14_15860	565.025	-0.0109426	0.112334	-0.0974112	0.9224	0.960552	NOT_CHANGE	hypothetical protein	Cytoplasmic [Class 3]
1867	PA14_15870	NA	PA14_15870	259.811	0.310883	0.117724	2.64079	0.00827128	0.0267711	NOT_CHANGE	hypothetical protein	Cytoplasmic [Class 3]
1868	PA14_15880	NA	PA14_15880	75.3887	1.08617	0.185659	5.85034	4.90556e-09	4.60605e-08	NOT_CHANGE	hypothetical protein	Unknown [Class 3]
1869	PA14_15910	NA	PA14_15910	2564.11	-0.0209378	0.0552015	-0.379297	0.704467	0.81117	NOT_CHANGE	hypothetical protein	Unknown [Class 3]
1870	PA14_15920	NA	PA14_15920	838.339	-0.69861	0.113428	-6.15904	7.31865e-10	7.40981e-09	NOT_CHANGE	major facilitator transporter	Cytoplasmic Membrane [Class 3]
1871	PA14_15930	NA	PA14_15930	331.077	-0.000469958	0.0940282	-0.00499805	0.996012	0.997414	NOT_CHANGE	hemolysin	Cytoplasmic Membrane [Class 3]
1872	PA14_16010	NA	PA14_16010	3816.37	0.0658202	0.0677644	0.971308	0.331395	0.49094	NOT_CHANGE	hypothetical protein	Unknown [Class 3]
1873	PA14_16020	NA	PA14_16020	41.1606	0.178276	0.250637	0.711291	0.476904	0.627537	NOT_CHANGE	hypothetical protein	Unknown [Class 3]
1874	PA14_16030	NA	PA14_16030	31.4808	0.185232	0.273747	0.676655	0.498625	0.646871	NOT_CHANGE	sodium/hydrogen antiporter	Cytoplasmic Membrane [Class 3]
1875	PA14_16100	NA	PA14_16100	707.472	-0.0930405	0.0959258	-0.969922	0.332085	0.491187	NOT_CHANGE	hypothetical protein	Unknown [Class 3]
1876	PA14_16110	NA	PA14_16110	3083.78	0.0427548	0.0747576	0.571913	0.567381	0.706433	NOT_CHANGE	hypothetical protein	Unknown [Class 3]
1877	PA14_16130	NA	PA14_16130	665.266	-0.0165494	0.0853489	-0.193903	0.846252	0.913869	NOT_CHANGE	hypothetical protein	Cytoplasmic [Class 3]
1878	PA14_16140	NA	PA14_16140	319.529	-0.142187	0.100146	-1.4198	0.155667	0.282264	NOT_CHANGE	hypothetical protein	Unknown [Class 3]
1879	PA14_16150	NA	PA14_16150	2300.85	-0.17725	0.0759964	-2.33235	0.0196825	0.0545778	NOT_CHANGE	hypothetical protein	Cytoplasmic [Class 3]
1880	PA14_16160	NA	PA14_16160	179.77	-0.265583	0.146583	-1.81183	0.0700124	0.15098	NOT_CHANGE	hypothetical protein	Cytoplasmic Membrane [Class 3]
1881	PA14_16180	NA	PA14_16180	469.584	-0.23392	0.0968583	-2.41508	0.0157317	0.0456004	NOT_CHANGE	hypothetical protein	Cytoplasmic Membrane [Class 3]
1882	PA14_16190	NA	PA14_16190	666.397	0.313402	0.103655	3.02352	0.0024985	0.00960571	NOT_CHANGE	hypothetical protein	Cytoplasmic Membrane [Class 3]
1883	PA14_16200	NA	PA14_16200	1432.2	-0.17543	0.121348	-1.44568	0.148268	0.27276	NOT_CHANGE	hypothetical protein	Cytoplasmic [Class 3]
1884	PA14_16210	NA	PA14_16210	762.568	0.33269	0.0976045	3.40855	0.000653088	0.00293066	NOT_CHANGE	hypothetical protein	Cytoplasmic [Class 3]
1885	PA14_16260	NA	PA14_16260	255.17	0.466573	0.212568	2.19494	0.0281681	0.0735214	NOT_CHANGE	FMN oxidoreductase	Cytoplasmic [Class 3]
1886	PA14_16270	NA	PA14_16270	320.953	1.08954	0.140821	7.73703	1.01768e-14	1.48476e-13	NOT_CHANGE	hypothetical protein	Unknown [Class 3]
1887	PA14_16280	NA	PA14_16280	158.423	-0.0543693	0.136599	-0.398022	0.690614	0.801467	NOT_CHANGE	transcriptional regulator	Cytoplasmic [Class 3]
1888	PA14_16290	NA	PA14_16290	2423.19	0.0362153	0.102049	0.354879	0.72268	0.824776	NOT_CHANGE	hypothetical protein	Cytoplasmic [Class 3]
1889	PA14_16300	NA	PA14_16300	1425.22	0.708216	0.265785	2.66462	0.0077075	0.0252044	NOT_CHANGE	hypothetical protein	Unknown [Class 3]
1890	PA14_16310	NA	PA14_16310	604.007	-0.202988	0.08651	-2.34641	0.0189555	0.0531288	NOT_CHANGE	MFS permease	Cytoplasmic Membrane [Class 3]
1891	PA14_16320	NA	PA14_16320	625.683	0.093313	0.0821854	1.1354	0.256209	0.407292	NOT_CHANGE	peptidyl-prolyl cis-trans isomerase, FkbP-type	Unknown (This protein may have multiple localization sites) [Class 3]
1892	PA14_16330	NA	PA14_16330	1399.81	-0.0106992	0.0597984	-0.178921	0.858	0.919661	NOT_CHANGE	hypothetical protein	Unknown [Class 3]
1893	PA14_16350	NA	PA14_16350	397.307	-0.280293	0.103452	-2.7094	0.00674053	0.0226008	NOT_CHANGE	two-component response regulator	Cytoplasmic [Class 3]
1894	PA14_16360	NA	PA14_16360	2746.73	1.60468	0.187659	8.55103	1.22e-17	2.05988e-16	NOT_CHANGE	hypothetical protein	Cytoplasmic [Class 3]
1895	PA14_16370	NA	PA14_16370	956.42	-0.000121588	0.0712706	-0.001706	0.998639	0.998876	NOT_CHANGE	hypothetical protein	Cytoplasmic Membrane [Class 3]
1896	PA14_16380	NA	PA14_16380	764.569	-0.222301	0.101676	-2.18636	0.0287895	0.0749026	NOT_CHANGE	LysR family transcriptional regulator	Cytoplasmic [Class 3]
1897	PA14_16390	NA	PA14_16390	386.381	-0.00766271	0.0969804	-0.079013	0.937022	0.967282	NOT_CHANGE	GMC-type oxidoreductase	Cytoplasmic Membrane [Class 3]
1898	PA14_16410	NA	PA14_16410	505.825	-0.126306	0.075619	-1.6703	0.0948602	0.191131	NOT_CHANGE	MFS transporter	Cytoplasmic Membrane [Class 3]
1899	PA14_16440	NA	PA14_16440	160.908	-0.0812831	0.146299	-0.555596	0.578487	0.715564	NOT_CHANGE	hypothetical protein	Cytoplasmic [Class 3]
1900	PA14_16470	NA	PA14_16470	1157.46	0.00203418	0.392012	0.00518907	0.99586	0.997414	NOT_CHANGE	chemotaxis sensor/effector fusion protein	Cytoplasmic [Class 3]
1901	PA14_16510	NA	PA14_16510	615.535	1.96973	0.100703	19.5599	3.39873e-85	4.49739e-83	NOT_CHANGE	peptide chain release factor 2	Cytoplasmic [Class 3]
1902	PA14_16550	NA	PA14_16550	1136.71	-0.141969	0.0724817	-1.95868	0.0501498	0.116756	NOT_CHANGE	TetR family transcriptional regulator	Cytoplasmic [Class 3]
1903	PA14_16560	NA	PA14_16560	3339.02	-0.144731	0.0764956	-1.89202	0.0584882	0.132378	NOT_CHANGE	lipoprotein	Unknown [Class 3]
1904	PA14_16580	NA	PA14_16580	1315.98	0.255574	0.118857	2.15026	0.0315345	0.0806433	NOT_CHANGE	hypothetical protein	Cytoplasmic [Class 3]
1905	PA14_16590	NA	PA14_16590	91.4768	-0.0624849	0.152516	-0.409694	0.682031	0.796047	NOT_CHANGE	hypothetical protein	Unknown [Class 3]
1906	PA14_16600	NA	PA14_16600	317.662	-0.229053	0.0960532	-2.38465	0.0170953	0.0487826	NOT_CHANGE	alpha/beta hydrolase	Unknown [Class 3]
1907	PA14_16610	NA	PA14_16610	682.104	0.0055394	0.0809572	0.0684239	0.945448	0.970346	NOT_CHANGE	hypothetical protein	Unknown [Class 3]
1908	PA14_16620	NA	PA14_16620	2388.9	-0.246249	0.0718072	-3.4293	0.000605138	0.0027458	NOT_CHANGE	hypothetical protein	Unknown [Class 3]
1909	PA14_16630	NA	PA14_16630	1343.29	0.13728	0.0642442	2.13685	0.03261	0.0830066	NOT_CHANGE	outer membrane protein, OmpA	Outer Membrane [Class 3]
1910	PA14_16640	NA	PA14_16640	77.1887	-0.326793	0.17101	-1.91096	0.0560099	0.127888	NOT_CHANGE	lipoprotein	Unknown [Class 3]
1911	PA14_16660	NA	PA14_16660	681.899	0.34103	0.0771798	4.41864	9.93241e-06	6.3005e-05	NOT_CHANGE	metal-transporting P-type ATPase	Cytoplasmic Membrane [Class 3]
1912	PA14_16670	NA	PA14_16670	1142.79	0.296951	0.0753445	3.94125	8.10587e-05	0.00043968	NOT_CHANGE	transcriptional regulator CadR	Cytoplasmic [Class 3]
1913	PA14_16680	NA	PA14_16680	1293.08	0.184584	0.0925009	1.99549	0.0459898	0.109034	NOT_CHANGE	hypothetical protein	Unknown [Class 3]
1914	PA14_16710	NA	PA14_16710	276.061	0.696864	0.127518	5.46483	4.63338e-08	3.95855e-07	NOT_CHANGE	hypothetical protein	Cytoplasmic Membrane [Class 3]
1915	PA14_16730	NA	PA14_16730	30.1411	-0.324306	0.274922	-1.17963	0.238148	0.386259	NOT_CHANGE	hypothetical protein	Cytoplasmic [Class 3]
1916	PA14_16740	NA	PA14_16740	190.234	-0.142823	0.156984	-0.909791	0.362932	0.521375	NOT_CHANGE	hypothetical protein	Unknown [Class 3]
1917	PA14_16750	NA	PA14_16750	170.172	0.22452	0.121426	1.84903	0.0644535	0.141927	NOT_CHANGE	hypothetical protein	Unknown [Class 3]
1918	PA14_16770	NA	PA14_16770	82.4019	-0.619501	0.166976	-3.71013	0.000207153	0.00103577	NOT_CHANGE	hypothetical protein	Cytoplasmic [Class 3]
1919	PA14_16780	NA	PA14_16780	2701.43	-0.0444627	0.0464182	-0.957871	0.338128	0.497144	NOT_CHANGE	hypothetical protein	Cytoplasmic [Class 3]
1920	PA14_16790	NA	PA14_16790	16722.5	-0.00463477	0.055271	-0.0838553	0.933171	0.965541	NOT_CHANGE	TetR family transcriptional regulator	Cytoplasmic [Class 3]
1921	PA14_16800	NA	PA14_16800	417.96	0.467579	0.146113	3.20011	0.00137375	0.00570558	NOT_CHANGE	efflux transmembrane protein	Cytoplasmic Membrane [Class 3]
1922	PA14_16820	NA	PA14_16820	986.26	-0.00509901	0.0919689	-0.0554427	0.955786	0.976726	NOT_CHANGE	efflux transmembrane protein	Cytoplasmic Membrane [Class 3]
1923	PA14_16830	NA	PA14_16830	2047.07	-0.161147	0.0630371	-2.55638	0.0105767	0.0330256	NOT_CHANGE	hypothetical protein	Unknown [Class 3]
1924	PA14_16840	NA	PA14_16840	98.4348	-0.275441	0.172961	-1.59251	0.11127	0.217271	NOT_CHANGE	lipoprotein	Unknown [Class 3]
1925	PA14_16870	NA	PA14_16870	187.726	0.123095	0.114082	1.07901	0.280584	0.436686	NOT_CHANGE	ABC transporter ATP-binding protein	Cytoplasmic [Class 3]
1926	PA14_16880	NA	PA14_16880	1226.74	0.0166424	0.0672791	0.247363	0.804627	0.88453	NOT_CHANGE	ABC transporter permease	Cytoplasmic Membrane [Class 3]
1927	PA14_16890	NA	PA14_16890	1994.32	-0.115032	0.0926824	-1.24114	0.214554	0.359062	NOT_CHANGE	auxiliary component of ABC transporter	Cytoplasmic Membrane [Class 3]
1928	PA14_16910	NA	PA14_16910	642.692	-0.366284	0.0783848	-4.67289	2.96987e-06	2.05579e-05	NOT_CHANGE	hypothetical protein	Unknown (This protein may have multiple localization sites) [Class 3]
1929	PA14_16930	NA	PA14_16930	175.463	0.185085	0.151486	1.2218	0.221784	0.367273	NOT_CHANGE	pyridoxal-phosphate dependent protein	Cytoplasmic [Class 3]
1930	PA14_16960	NA	PA14_16960	14.7178	0.43809	0.412853	1.06113	0.288632	0.445554	NOT_CHANGE	amino acid transporter LysE	Cytoplasmic Membrane [Class 3]
1931	PA14_16970	NA	PA14_16970	460.75	0.716461	0.135154	5.30106	1.15132e-07	9.45314e-07	NOT_CHANGE	arsenate reductase	Unknown [Class 3]
1932	PA14_16980	NA	PA14_16980	330.51	0.274409	0.120827	2.27108	0.023142	0.0629134	NOT_CHANGE	hypothetical protein	Unknown [Class 3]
1933	PA14_16990	NA	PA14_16990	1195.73	-0.0935449	0.0770414	-1.21422	0.224665	0.37032	NOT_CHANGE	hypothetical protein	Unknown [Class 3]
1934	PA14_17000	NA	PA14_17000	1443.79	-0.571633	0.0902198	-6.336	2.35799e-10	2.50317e-09	NOT_CHANGE	hypothetical protein	Unknown [Class 3]
1935	PA14_17010	NA	PA14_17010	853.169	-0.195555	0.107648	-1.81661	0.0692768	0.149994	NOT_CHANGE	Na(+)/H(+) exchanger protein	Cytoplasmic Membrane [Class 3]
1936	PA14_17030	NA	PA14_17030	192.042	0.141442	0.120024	1.17846	0.238615	0.386705	NOT_CHANGE	succinyldiaminopimelate transaminase	Cytoplasmic [Class 3]
1937	PA14_17140	NA	PA14_17140	398.778	-0.155464	0.116067	-1.33943	0.180431	0.315602	NOT_CHANGE	membrane-associated zinc metalloprotease	Cytoplasmic Membrane [Class 3]
1938	PA14_17150	NA	PA14_17150	17.5633	0.0713745	0.330814	0.215755	0.829179	0.903318	NOT_CHANGE	outer membrane antigen	Outer Membrane [Class 3]
1939	PA14_17170	NA	PA14_17170	211.067	0.835831	0.112587	7.42386	1.13756e-13	1.52299e-12	NOT_CHANGE	hypothetical protein	Unknown (This protein may have multiple localization sites) [Class 3]
1940	PA14_17250	NA	PA14_17250	15.2926	-1.14367	0.405848	-2.81797	0.00483285	0.0168862	NOT_CHANGE	amino acid permease	Cytoplasmic Membrane [Class 3]
1941	PA14_17280	NA	PA14_17280	1196.95	-0.0535497	0.0800753	-0.668741	0.50366	0.651621	NOT_CHANGE	hypothetical protein	Cytoplasmic [Class 3]
1942	PA14_17330	NA	PA14_17330	400.555	0.67555	0.101023	6.6871	2.2763e-11	2.60607e-10	NOT_CHANGE	hypothetical protein	Unknown [Class 3]
1943	PA14_17350	NA	PA14_17350	370.408	0.103091	0.0921518	1.11871	0.263265	0.415758	NOT_CHANGE	hypothetical protein	Unknown [Class 3]
1944	PA14_17370	NA	PA14_17370	116.815	0.318678	0.142915	2.22985	0.0257577	0.0685186	NOT_CHANGE	inner membrane protein	Cytoplasmic Membrane [Class 3]
1945	PA14_17410	NA	PA14_17410	1730.31	-0.104982	0.0585011	-1.79453	0.0727292	0.155516	NOT_CHANGE	esterase	Unknown [Class 3]
1946	PA14_17470	NA	PA14_17470	896.719	0.0850148	0.0882457	0.963388	0.335353	0.494598	NOT_CHANGE	hypothetical protein	Outer Membrane [Class 3]
1947	PA14_17510	NA	PA14_17510	268.701	0.273114	0.0959721	2.84577	0.00443048	0.0156775	NOT_CHANGE	hypothetical protein	Unknown [Class 3]
1948	PA14_17520	NA	PA14_17520	261.444	0.13486	0.101715	1.32586	0.184886	0.321172	NOT_CHANGE	hypothetical protein	Unknown [Class 3]
1949	PA14_17550	NA	PA14_17550	625.277	0.0761264	0.0830881	0.916212	0.359555	0.518204	NOT_CHANGE	hypothetical protein	Cytoplasmic [Class 3]
1950	PA14_17570	NA	PA14_17570	45.4926	0.303298	0.219799	1.37989	0.167621	0.298704	NOT_CHANGE	hypothetical protein	Cytoplasmic [Class 3]
1951	PA14_17580	NA	PA14_17580	299.863	-0.0845061	0.100929	-0.837279	0.402436	0.559496	NOT_CHANGE	hypothetical protein	Cytoplasmic [Class 3]
1952	PA14_17590	NA	PA14_17590	401.951	0.182904	0.0936589	1.95287	0.050835	0.11811	NOT_CHANGE	hypothetical protein	Unknown [Class 3]
1953	PA14_17600	NA	PA14_17600	174.63	0.518269	0.140432	3.69054	0.000223777	0.00111204	NOT_CHANGE	hypothetical protein	Unknown [Class 3]
1954	PA14_17650	NA	PA14_17650	182.549	0.202085	0.114965	1.75779	0.0787829	0.165232	NOT_CHANGE	hypothetical protein	Cytoplasmic [Class 3]
1955	PA14_17660	NA	PA14_17660	1775.77	-0.267725	0.0782118	-3.42308	0.000619159	0.00280008	NOT_CHANGE	hypothetical protein	Cytoplasmic Membrane [Class 3]
1956	PA14_17670	NA	PA14_17670	121.593	-0.621982	0.138328	-4.49645	6.90985e-06	4.50884e-05	NOT_CHANGE	LuxR family transcriptional regulator	Cytoplasmic [Class 3]
1957	PA14_17690	NA	PA14_17690	26.0356	-1.63308	0.298539	-5.47023	4.49441e-08	3.84559e-07	NOT_CHANGE	hypothetical protein	Cytoplasmic [Class 3]
1958	PA14_17720	NA	PA14_17720	777.68	-0.165123	0.0740689	-2.22931	0.0257931	0.0685807	NOT_CHANGE	LuxR family transcriptional regulator	Cytoplasmic [Class 3]
1959	PA14_17730	NA	PA14_17730	931.425	-0.586021	0.111352	-5.26281	1.41874e-07	1.14831e-06	NOT_CHANGE	hypothetical protein	Cytoplasmic [Class 3]
1960	PA14_17740	NA	PA14_17740	1403.42	-0.0361296	0.0673367	-0.536551	0.591578	0.725917	NOT_CHANGE	amino acid ABC transporter permease	Cytoplasmic Membrane [Class 3]
1961	PA14_17760	NA	PA14_17760	657.652	-0.315535	0.0736589	-4.28373	1.83787e-05	0.00011125	NOT_CHANGE	methylated-DNA--protein-cysteine methyltransferase	Cytoplasmic [Class 3]
1962	PA14_17780	NA	PA14_17780	2100.73	0.100134	0.076414	1.31041	0.190056	0.3282	NOT_CHANGE	major facilitator transporter	Cytoplasmic Membrane [Class 3]
1963	PA14_17790	NA	PA14_17790	1347.49	1.15368	0.071126	16.2202	3.63046e-59	2.68277e-57	NOT_CHANGE	LysR family transcriptional regulator	Cytoplasmic [Class 3]
1964	PA14_17810	NA	PA14_17810	674.53	0.00724697	0.0720497	0.100583	0.919881	0.959509	NOT_CHANGE	acyl-CoA dehydrogenase	Cytoplasmic [Class 3]
1965	PA14_17820	NA	PA14_17820	4257.18	0.0530222	0.0789038	0.671985	0.501593	0.649823	NOT_CHANGE	hypothetical protein	Cytoplasmic [Class 3]
1966	PA14_17850	NA	PA14_17850	516.486	0.00727203	0.0744446	0.0976838	0.922183	0.960502	NOT_CHANGE	enoyl-CoA hydratase	Cytoplasmic [Class 3]
1967	PA14_17860	NA	PA14_17860	258.021	-0.309693	0.0985885	-3.14127	0.00168218	0.00679986	NOT_CHANGE	3-hydroxyacyl-CoA dehydrogenase	Cytoplasmic [Class 3]
1968	PA14_17880	NA	PA14_17880	637.327	-0.0406647	0.0896252	-0.453719	0.650031	0.772327	NOT_CHANGE	acetyl-CoA acetyltransferase	Cytoplasmic [Class 3]
1969	PA14_17890	NA	PA14_17890	229.009	-1.04845	0.214692	-4.88354	1.042e-06	7.60125e-06	NOT_CHANGE	porin	Outer Membrane [Class 3]
1970	PA14_17910	NA	PA14_17910	41.5286	-0.0102278	0.238283	-0.042923	0.965763	0.981356	NOT_CHANGE	alpha/beta hydrolase	Unknown [Class 3]
1971	PA14_17990	NA	PA14_17990	2323.5	-0.225983	0.0511684	-4.41646	1.00332e-05	6.35735e-05	NOT_CHANGE	hypothetical protein	Cytoplasmic [Class 3]
1972	PA14_18010	NA	PA14_18010	46.5401	0.739672	0.237246	3.11774	0.00182243	0.00727183	NOT_CHANGE	glycerol kinase	Cytoplasmic [Class 3]
1973	PA14_18020	NA	PA14_18020	400.892	-0.0750015	0.0995844	-0.753145	0.451363	0.606164	NOT_CHANGE	PhzF family phenazine biosynthesis protein	Cytoplasmic Membrane [Class 3]
1974	PA14_18040	NA	PA14_18040	967.59	-0.0664755	0.170682	-0.38947	0.696929	0.806821	NOT_CHANGE	hypothetical protein	Unknown [Class 3]
1975	PA14_18050	NA	PA14_18050	1410.35	-0.162744	0.0662885	-2.45508	0.0140853	0.0416772	NOT_CHANGE	hypothetical protein	Unknown [Class 3]
1976	PA14_18060	NA	PA14_18060	235.037	-0.0626106	0.105149	-0.595445	0.551546	0.692458	NOT_CHANGE	hypothetical protein	Cytoplasmic Membrane [Class 3]
1977	PA14_18070	NA	PA14_18070	1320.6	-0.20653	0.0767497	-2.69095	0.00712484	0.0236387	NOT_CHANGE	periplasmic metal-binding protein	Unknown [Class 3]
1978	PA14_18080	NA	PA14_18080	304.414	-0.597039	0.112579	-5.30328	1.13742e-07	9.3525e-07	NOT_CHANGE	TetR family transcriptional regulator	Cytoplasmic [Class 3]
1979	PA14_18090	NA	PA14_18090	379.63	-0.0303526	0.0844913	-0.359239	0.719416	0.821984	NOT_CHANGE	major facilitator subfamily transporter protein	Cytoplasmic Membrane [Class 3]
1980	PA14_18100	NA	PA14_18100	139.9	0.0271706	0.145811	0.18634	0.852178	0.916962	NOT_CHANGE	hypothetical protein	Unknown [Class 3]
1981	PA14_18150	NA	PA14_18150	1826.82	-0.0263524	0.0563871	-0.467348	0.640251	0.76486	NOT_CHANGE	acetyl-coa synthetase	Cytoplasmic [Class 3]
1982	PA14_18160	NA	PA14_18160	282.776	-0.485681	0.120088	-4.04437	5.24651e-05	0.000294695	NOT_CHANGE	oxidoreductase	Cytoplasmic [Class 3]
1983	PA14_18180	NA	PA14_18180	219.755	-0.0891496	0.144562	-0.616686	0.537442	0.680395	NOT_CHANGE	hypothetical protein	Unknown [Class 3]
1984	PA14_18200	NA	PA14_18200	35.7061	-0.207189	0.256947	-0.80635	0.420041	0.576884	NOT_CHANGE	LysR family transcriptional regulator	Cytoplasmic [Class 3]
1985	PA14_18210	NA	PA14_18210	850.217	0.184894	0.0922567	2.00413	0.0450563	0.10728	NOT_CHANGE	TatD family deoxyribonuclease	Cytoplasmic [Class 3]
1986	PA14_18250	NA	PA14_18250	800.806	-0.291004	0.082169	-3.54153	0.000397814	0.0018863	NOT_CHANGE	phosphotransferase system enzyme I	Unknown (This protein may have multiple localization sites) [Class 3]
1987	PA14_18300	NA	PA14_18300	45.1169	0.37849	0.253548	1.49278	0.135496	0.253898	NOT_CHANGE	nucleotide sugar dehydrogenase	Cytoplasmic [Class 3]
1988	PA14_18310	NA	PA14_18310	1952.36	-0.152629	0.0840978	-1.8149	0.0695391	0.150276	NOT_CHANGE	hypothetical protein	Cytoplasmic Membrane [Class 3]
1989	PA14_18320	NA	PA14_18320	21.2445	0.260212	0.306251	0.849669	0.395509	0.554161	NOT_CHANGE	hypothetical protein	Cytoplasmic Membrane [Class 3]
1990	PA14_18340	NA	PA14_18340	361.642	-0.0928453	0.105141	-0.883058	0.377205	0.536148	NOT_CHANGE	hypothetical protein	Cytoplasmic [Class 3]
1991	PA14_18350	NA	PA14_18350	125.565	-0.203484	0.160368	-1.26886	0.204491	0.346399	NOT_CHANGE	bifunctional UDP-glucuronic acid decarboxylase/UDP-4-amino-4-deoxy-L-arabinose formyltransferase	Cytoplasmic [Class 3]
1992	PA14_18360	NA	PA14_18360	391.399	-0.195608	0.106832	-1.831	0.0671011	0.146398	NOT_CHANGE	glycosyl transferase family protein	Cytoplasmic Membrane [Class 3]
1993	PA14_18370	NA	PA14_18370	220.019	0.0714171	0.102033	0.699939	0.483966	0.633012	NOT_CHANGE	UDP-4-amino-4-deoxy-L-arabinose--oxoglutarate aminotransferase	Cytoplasmic [Class 3]
1994	PA14_18590	NA	PA14_18590	0.796921	1.10397	1.55897	0.708137	0.47886	0.628415	NOT_CHANGE	hypothetical protein	Cytoplasmic [Class 3]
1995	PA14_18600	NA	PA14_18600	20195.6	4.5293	0.121476	37.2856	2.80666e-304	1.59699e-300	UP	ABC transporter ATP-binding protein	Cytoplasmic Membrane [Class 3]
1996	PA14_18630	NA	PA14_18630	778.144	-0.25904	0.0852306	-3.03929	0.0023714	0.00916662	NOT_CHANGE	serine protease	Outer Membrane [Class 3]
1997	PA14_18640	NA	PA14_18640	238.671	1.42352	0.249523	5.70496	1.16373e-08	1.05273e-07	NOT_CHANGE	oxidoreductase	Cytoplasmic [Class 3]
1998	PA14_18650	NA	PA14_18650	543.778	-0.0519983	0.099501	-0.522591	0.601259	0.733683	NOT_CHANGE	hypothetical protein	Unknown [Class 3]
1999	PA14_18660	NA	PA14_18660	721.381	0.1528	0.0680763	2.24454	0.0247975	0.0665554	NOT_CHANGE	hypothetical protein	Cytoplasmic Membrane [Class 3]
[truncated: 3,692 more rows]

## Sheet: Up- and Down-
Locus.Tag	Gene.Name	log2FoldChange	pvalue	padj	group	Product.Name.y
PA14_65260	-	3.12784	0.00419313	0.0149492	UP	hypothetical protein
PA14_04380	-	2.15743	0.00511649	0.0177301	UP	hypothetical protein
PA14_17270	accA	2.6218	0.00103886	0.00444778	UP	acetyl-CoA carboxylase carboxyltransferase subunit alpha
PA14_25620	-	2.43706	0.000398699	0.00188892	UP	hypothetical protein
PA14_09070	rpmJ	5.15565	3.93544e-06	2.66579e-05	UP	50S ribosomal protein L36
PA14_51530	exoU	2.91251	5.66691e-05	0.000315506	UP	ExoU
PA14_66550	hemE	3.10562	8.00423e-06	5.18725e-05	UP	uroporphyrinogen decarboxylase
PA14_07520	rpoD	2.01304	0.000200032	0.00100369	UP	RNA polymerase sigma factor RpoD
PA14_19050	metG	2.15611	2.12157e-06	1.4885e-05	UP	methionyl-tRNA synthetase
PA14_73410	-	2.04424	1.85566e-05	0.000112088	UP	inner membrane protein translocase component YidC
PA14_24170	fadH1	2.05402	9.22733e-08	7.68719e-07	UP	2,4-dienoyl-CoA reductase
PA14_46070	gbuA	3.02233	7.83742e-11	8.68988e-10	UP	guanidinobutyrase
PA14_09020	rpsE	2.27463	2.33786e-10	2.48644e-09	UP	30S ribosomal protein S5
PA14_05560	-	2.41616	7.26785e-10	7.3715e-09	UP	ATP-dependent RNA helicase
PA14_67750	-	2.068	8.2321e-07	6.0832e-06	UP	rhodanese-like domain-containing protein
PA14_65960	waaA	2.14882	1.32036e-09	1.30886e-08	UP	3-deoxy-D-manno-octulosonic-acid transferase
PA14_50510	-	2.01655	4.98705e-09	4.66715e-08	UP	hypothetical protein
PA14_51270	dapA	2.06231	2.86709e-10	3.02107e-09	UP	dihydrodipicolinate synthase
PA14_09030	rpmD	2.00441	1.96649e-11	2.26047e-10	UP	50S ribosomal protein L30
PA14_73150	-	4.8662	4.01737e-10	4.1866e-09	UP	hypothetical protein
PA14_05920	-	2.58339	5.04202e-19	9.13666e-18	UP	hypothetical protein
PA14_52570	rsmA	2.15151	5.08723e-12	6.14572e-11	UP	carbon storage regulator
PA14_12370	-	2.12732	3.71389e-20	7.09129e-19	UP	hypothetical protein
PA14_25630	rpmF	2.43137	1.21356e-17	2.05511e-16	UP	50S ribosomal protein L32
PA14_39850	-	3.01737	4.25625e-08	3.66386e-07	UP	MFS transporter
PA14_49470	nrdB	2.76171	1.63985e-13	2.1649e-12	UP	ribonucleotide-diphosphate reductase subunit beta
PA14_08720	rplK	2.16836	9.52902e-24	2.18629e-22	UP	50S ribosomal protein L11
PA14_67830	-	2.79366	1.15184e-39	5.04153e-38	UP	hypothetical protein
PA14_41830	thrH	2.38271	8.66635e-28	2.39376e-26	UP	phosphoserine phosphatase
PA14_08340	trpG	2.58245	6.19643e-38	2.57356e-36	UP	anthranilate synthase component II
PA14_54550	-	2.60966	3.43311e-23	7.60092e-22	UP	hypothetical protein
PA14_23750	leuC	2.01602	1.10115e-21	2.27837e-20	UP	isopropylmalate isomerase large subunit
PA14_55450	hxcQ	2.341	1.47995e-44	7.25939e-43	UP	HxcQ
PA14_04900	ftsY	2.92261	5.63012e-28	1.5627e-26	UP	signal recognition particle receptor FtsY
PA14_39800	-	2.23655	1.33365e-53	8.33897e-52	UP	ECF subfamily RNA polymerase sigma-70 factor
PA14_11530	-	3.36755	1.81029e-47	9.82113e-46	UP	hypothetical protein
PA14_34490	-	3.15933	1.4551e-14	2.1014e-13	UP	hypothetical protein
PA14_65700	-	2.04109	1.25832e-60	9.67544e-59	UP	hypothetical protein
PA14_25420	-	2.28275	2.6266e-32	8.39625e-31	UP	hypothetical protein
PA14_27480	htpX	3.74746	3.53795e-87	4.90998e-85	UP	heat shock protein HtpX
PA14_62130	ilvC	3.025	9.50438e-88	1.352e-85	UP	ketol-acid reductoisomerase
PA14_23580	-	2.25384	4.00423e-61	3.12111e-59	UP	tRNA-Glu
PA14_14680	-	2.25147	4.01956e-48	2.28713e-46	UP	extragenic suppressor protein SuhB
PA14_54580	-	2.2139	1.13526e-23	2.57356e-22	UP	hypothetical protein
PA14_15980	rimM	2.54556	7.49491e-81	8.88459e-79	UP	16S rRNA-processing protein RimM
PA14_62870	rrmJ	2.24752	8.4956e-85	1.09864e-82	UP	cell division protein FtsJ
PA14_08680	tufB	2.52804	1.25467e-57	8.92387e-56	UP	elongation factor Tu
PA14_54520	-	2.59391	3.09985e-55	2.05095e-53	UP	porin
PA14_57800	hisG	2.01427	6.49032e-53	3.97096e-51	UP	ATP phosphoribosyltransferase
PA14_72930	-	2.80675	4.37949e-81	5.30198e-79	UP	hypothetical protein
PA14_64190	fis	2.71387	1.39856e-72	1.42104e-70	UP	DNA-binding protein Fis
PA14_00160	-	2.23501	0.000103581	0.000550819	UP	hypothetical protein
PA14_65310	hfq	2.21625	9.01447e-39	3.85187e-37	UP	RNA-binding protein Hfq
PA14_73420	rnpA	2.53	1.22107e-43	5.88803e-42	UP	ribonuclease P
PA14_20720	flgN	2.47735	1.49907e-06	1.07023e-05	UP	hypothetical protein
PA14_51420	pqsB	2.2851	7.8546e-55	5.07871e-53	UP	PqsB
PA14_55230	-	2.21763	7.30313e-115	1.59826e-112	UP	hypothetical protein
PA14_09040	rplO	2.90058	7.74263e-79	8.81111e-77	UP	50S ribosomal protein L15
PA14_73190	glmR	2.57411	8.2559e-150	3.13174e-147	UP	GlmR transcriptional regulator
PA14_32420	-	3.76772	1.4458e-100	2.49291e-98	UP	oxidoreductase
PA14_56670	-	4.78726	1.60134e-135	4.79559e-133	UP	hypothetical protein
PA14_64100	accB	2.0609	3.93911e-10	4.11257e-09	UP	acetyl-CoA carboxylase biotin carboxyl carrier protein subunit
PA14_25540	ptpA	2.105	7.23312e-55	4.73063e-53	UP	phosphotyrosine protein phosphatase
PA14_12400	thiE	5.34308	2.85532e-203	2.7078e-200	UP	thiamine-phosphate pyrophosphorylase
PA14_50340	flgL	2.52343	1.01577e-14	1.48476e-13	UP	flagellar hook-associated protein FlgL
PA14_32640	-	2.43602	1.24422e-88	1.90484e-86	UP	hypothetical protein
PA14_62860	ftsH	4.10476	2.50172e-216	3.55869e-213	UP	cell division protein FtsH
PA14_19570	-	2.30278	6.31342e-111	1.33049e-108	UP	ABC transporter permease
PA14_11740	-	3.12839	7.34102e-130	1.89865e-127	UP	hypothetical protein
PA14_63030	omlA	4.18608	8.32046e-54	5.26038e-52	UP	outer membrane lipoprotein OmlA precursor
PA14_65280	hflK	2.17639	1.27213e-88	1.90484e-86	UP	protease subunit HflK
PA14_19530	-	2.45404	1.11396e-57	8.02333e-56	UP	NAD(P)H-dependent FMN reductase
PA14_51230	-	2.28506	1.21163e-90	1.91504e-88	UP	tRNA-Ser
PA14_19560	ssuD	2.36098	1.78853e-76	1.92014e-74	UP	alkanesulfonate monooxygenase
PA14_68830	-	2.02127	8.74345e-182	5.5278e-179	UP	hypothetical protein
PA14_14570	-	2.77665	3.50642e-26	9.19426e-25	UP	tRNA-Leu
PA14_57180	-	4.11547	1.64406e-95	2.75138e-93	UP	hypothetical protein
PA14_25480	-	2.34629	4.6917e-178	2.66958e-175	UP	competence protein
PA14_13610	-	2.77025	1.82731e-61	1.46442e-59	UP	ABC transporter permease
PA14_19590	-	2.96399	7.99478e-194	6.49862e-191	UP	molybdopterin-binding protein
PA14_08780	rpoC	2.01946	8.7047e-15	1.27984e-13	UP	DNA-directed RNA polymerase subunit beta'
PA14_17940	glpR	2.24901	7.96643e-80	9.25081e-78	UP	glycerol-3-phosphate regulon repressor
PA14_47280	phnX	2.71846	6.01775e-143	2.01417e-140	UP	phosphonoacetaldehyde hydrolase
PA14_06240	-	3.8332	1.84422e-211	2.09872e-208	UP	LysR family transcriptional regulator
PA14_19540	-	2.67689	1.23369e-177	6.38153e-175	UP	hypothetical protein
PA14_26470	cbiD	2.29589	3.4712e-129	8.58745e-127	UP	cobalt-precorrin-6A synthase
PA14_46830	-	2.59828	4.11528e-132	1.11505e-129	UP	hypothetical protein
PA14_55740	-	2.00429	5.44122e-156	2.21147e-153	UP	transporter
PA14_18670	bfrB	2.69633	9.97737e-69	9.30676e-67	UP	bacterioferritin
PA14_39925	phzD2	4.15238	9.33302e-175	4.42541e-172	UP	phenazine biosynthesis protein PhzD
PA14_56380	-	4.13292	2.08102e-32	6.72784e-31	UP	hypothetical protein
PA14_38970	-	3.4984	3.09487e-118	7.04392e-116	UP	two-component sensor
PA14_67550	-	4.71628	1.63737e-173	7.16663e-171	UP	transcriptional regulator
PA14_39410	-	2.93028	4.19807e-24	9.78977e-23	UP	hypothetical protein
PA14_62000	hitA	5.51219	2.44731e-229	4.64173e-226	UP	ferric iron-binding periplasmic protein HitA
PA14_62010	hitB	5.02744	3.70684e-238	1.0546e-234	UP	iron ABC transporter, permease
PA14_18600	-	4.5293	2.80666e-304	1.59699e-300	UP	ABC transporter ATP-binding protein
PA14_43090	tap	4.19427	3.28358e-184	2.33544e-181	UP	Tap
PA14_61060	-	-2.09555	2.35006e-61	1.8572e-59	DOWN	oxidoreductase
PA14_14800	fdx2	-2.20696	6.41768e-107	1.25919e-104	DOWN	ferredoxin 2Fe-2S
PA14_22320	-	-3.11366	4.40718e-46	2.32193e-44	DOWN	hypothetical protein
PA14_03760	-	-2.3383	4.05127e-36	1.60081e-34	DOWN	sodium:solute symporter
PA14_36320	hcnB	-2.80331	1.22868e-10	1.34433e-09	DOWN	hydrogen cyanide synthase HcnB
PA14_11510	ribA	-2.2956	4.08027e-10	4.23663e-09	DOWN	GTP cyclohydrolase II
PA14_03200	tle3	-2.25624	0.000112486	0.000592632	DOWN	Type VI effector Tle3
PA14_27770	-	-3.07868	0.000702931	0.00313209	DOWN	ABC transporter ATP-binding protein
PA14_44000	sucB	-3.10288	0.00303187	0.0113496	DOWN	dihydrolipoamide succinyltransferase
