# Supplementary material for: Genome-wide CRISPRi-seq identified ferredoxin-NADP reductase FprB as a synergistic target for gallium therapy in Pseudomonas aeruginosa
Source: bioRxiv preprint, doi:10.1101/2024.09.01.610675, version 1 (2024-09-01)
Supplement: Supplementary Table S9 [file 610675_file10.xlsx]

## Sheet: Sheet1
gene_id	K1	K2	K3	C1	C2	C3	KO	WT	log2FoldChange	pvalue	padj	gene_name	gene_chr	gene_start	gene_end	gene_strand	gene_length	gene_biotype	gene_description	tf_family	significant
PA5570	2157.83	1895.93	2214.79	798.495	1629.88	1532.26	2089.52	1320.21	0.662491	0.0226655	0.112645	rpmH	NC_002516.2	6264227	6264361	-	135	protein_coding	50S ribosomal protein L34&&sp|A6VF47|RL34_PSEA7 50S ribosomal protein L34 OS=Pseudomonas aeruginosa (strain PA7) OX=381754 GN=rpmH PE=3 SV=1 && PF00468:Ribosomal protein L34	-	NOT_CHANGE
PA5569	5613.91	4704.13	4811.47	1578.97	3259.76	3765.49	5043.17	2868.07	0.814324	0.0113265	0.0723274	rnpA	NC_002516.2	6263805	6264212	-	408	protein_coding	ribonuclease P&&sp|Q02DD9|RNPA_PSEAB Ribonuclease P protein component OS=Pseudomonas aeruginosa (strain UCBPP-PA14) OX=208963 GN=rnpA PE=3 SV=1 && PF00825:Ribonuclease P	-	NOT_CHANGE
PA5568	5169.33	4220.12	4177.05	914.191	2422.41	2633.64	4522.17	1990.08	1.18428	0.00142643	0.0171423	PA5568	NC_002516.2	6261828	6263564	-	1737	protein_coding	inner membrane protein translocase subunit YidC&&sp|Q9HT06|YIDC_PSEAE Membrane protein insertase YidC OS=Pseudomonas aeruginosa (strain ATCC 15692 / DSM 22644 / CIP 104116 / JCM 14847 / LMG 12228 / 1C / PRS 101 / PAO1) OX=208964 GN=yidC PE=3 SV=1 && PF14849:YidC periplasmic domain|PF02096:60Kd inner membrane protein	-	UP
PA5567	926.615	717.695	723.429	581.327	714.324	731.449	789.246	675.7	0.224377	0.263933	0.495226	PA5567	NC_002516.2	6260390	6261757	-	1368	protein_coding	tRNA modification GTPase TrmE&&sp|Q9HT07|MNME_PSEAE tRNA modification GTPase MnmE OS=Pseudomonas aeruginosa (strain ATCC 15692 / DSM 22644 / CIP 104116 / JCM 14847 / LMG 12228 / 1C / PRS 101 / PAO1) OX=208964 GN=mnmE PE=3 SV=1 && PF12631:MnmE helical domain|PF10396:GTP-binding protein TrmE N-terminus|PF01926:50S ribosome-binding GTPase	-	NOT_CHANGE
PA5566	43.3735	44.0003	35.1882	47.4165	38.1481	31.528	40.854	39.0309	0.0637331	0.839829	0.922102	PA5566	NC_002516.2	6259671	6260054	-	384	protein_coding	hypothetical protein&&-- && -	-	NOT_CHANGE
PA5565	3171.19	2527.58	2379.35	1064.98	2103.87	2458.13	2692.7	1875.66	0.521783	0.10409	0.286353	gidA	NC_002516.2	6257305	6259197	-	1893	protein_coding	tRNA uridine 5-carboxymethylaminomethyl modification protein GidA&&sp|Q9HT09|MNMG_PSEAE tRNA uridine 5-carboxymethylaminomethyl modification enzyme MnmG OS=Pseudomonas aeruginosa (strain ATCC 15692 / DSM 22644 / CIP 104116 / JCM 14847 / LMG 12228 / 1C / PRS 101 / PAO1) OX=208964 GN=mnmG PE=3 SV=1 && PF13932:GidA associated domain|PF01134:Glucose inhibited division protein A	-	NOT_CHANGE
PA5564	899.014	896.629	904.545	228.548	765.824	773.486	900.063	589.286	0.611283	0.134912	0.33297	gidB	NC_002516.2	6256661	6257305	-	645	protein_coding	16S rRNA methyltransferase GidB&&sp|B7V7A1|RSMG_PSEA8 Ribosomal RNA small subunit methyltransferase G OS=Pseudomonas aeruginosa (strain LESB58) OX=557722 GN=rsmG PE=3 SV=1 && PF02527:rRNA small subunit methyltransferase G	-	NOT_CHANGE
PA5563	1519.06	1680.81	1633.15	1220.5	1549.77	1384.08	1611.01	1384.78	0.218307	0.193182	0.41444	soj	NC_002516.2	6255854	6256642	-	789	protein_coding	chromosome partitioning protein Soj&&sp|P0A149|Y002_PSEPK Uncharacterized protein PP_0002 OS=Pseudomonas putida (strain ATCC 47054 / DSM 6125 / NCIMB 11950 / KT2440) OX=160488 GN=PP_0002 PE=4 SV=1 && PF13614:AAA domain	-	NOT_CHANGE
PA5562	1609.75	2199.04	1965.37	970.143	1598.41	1627.89	1924.72	1398.81	0.460565	0.0777628	0.238633	spoOJ	NC_002516.2	6254972	6255844	-	873	protein_coding	chromosome partitioning protein&&sp|P0A151|PARB_PSEPK Probable chromosome-partitioning protein ParB OS=Pseudomonas putida (strain ATCC 47054 / DSM 6125 / NCIMB 11950 / KT2440) OX=160488 GN=parB PE=3 SV=1 && PF17762:HTH domain found in ParB protein|PF02195:ParB-like nuclease domain	ParBc	NOT_CHANGE
PA5561	265.17	309.958	297.03	202.943	386.25	347.859	290.719	312.35	-0.103196	0.71004	0.850394	atpI	NC_002516.2	6254428	6254808	-	381	protein_coding	ATP synthase subunit I&&sp|Q9HT13|ATPZ_PSEAE ATP synthase protein I OS=Pseudomonas aeruginosa (strain ATCC 15692 / DSM 22644 / CIP 104116 / JCM 14847 / LMG 12228 / 1C / PRS 101 / PAO1) OX=208964 GN=atpI PE=3 SV=1 && PF03899:ATP synthase I chain	-	NOT_CHANGE
PA5560	3818.84	4133.1	3866.57	1523.97	3046.13	3214.8	3939.5	2594.97	0.602373	0.0418663	0.165972	atpB	NC_002516.2	6253542	6254411	-	870	protein_coding	ATP synthase subunit A&&sp|A6VF38|ATP6_PSEA7 ATP synthase subunit a OS=Pseudomonas aeruginosa (strain PA7) OX=381754 GN=atpB PE=3 SV=1 && PF00119:ATP synthase A chain	-	NOT_CHANGE
PA5559	7144.8	12986.9	11433.1	2954.05	8695.87	6356.04	10521.6	6001.99	0.809847	0.0398118	0.160461	atpE	NC_002516.2	6253235	6253492	-	258	protein_coding	ATP synthase subunit C&&sp|A6VF37|ATPL_PSEA7 ATP synthase subunit c OS=Pseudomonas aeruginosa (strain PA7) OX=381754 GN=atpE PE=3 SV=1 && PF00137:ATP synthase subunit C	-	NOT_CHANGE
PA5558	10710.3	18213.2	16481.5	3579.95	11699.1	9857.75	15135	8378.93	0.85306	0.0390633	0.158317	atpF	NC_002516.2	6252707	6253177	-	471	protein_coding	ATP synthase subunit B&&sp|Q02DF0|ATPF_PSEAB ATP synthase subunit b OS=Pseudomonas aeruginosa (strain UCBPP-PA14) OX=208963 GN=atpF PE=3 SV=1 && PF00430:ATP synthase B/B' CF(0)	-	NOT_CHANGE
PA5557	9177.44	15151.8	13621	2710.33	9535.13	8311.83	12650	6852.43	0.884467	0.0383443	0.156975	atpH	NC_002516.2	6252159	6252695	-	537	protein_coding	ATP synthase subunit delta&&sp|A6VF35|ATPD_PSEA7 ATP synthase subunit delta OS=Pseudomonas aeruginosa (strain PA7) OX=381754 GN=atpH PE=3 SV=1 && PF00213:ATP synthase delta (OSCP) subunit	-	NOT_CHANGE
PA5556	28675.8	47005.1	42664.7	13007.3	37694.2	34853.1	39448.5	28518.2	0.46809	0.23304	0.462292	atpA	NC_002516.2	6250596	6252140	-	1545	protein_coding	ATP synthase subunit alpha&&sp|A6VF34|ATPA_PSEA7 ATP synthase subunit alpha OS=Pseudomonas aeruginosa (strain PA7) OX=381754 GN=atpA PE=3 SV=1 && PF02874:ATP synthase alpha/beta family, beta-barrel domain|PF00006:ATP synthase alpha/beta family, nucleotide-binding domain|PF00306:ATP synthase alpha/beta chain, C terminal domain	ATP-synt_ab	NOT_CHANGE
PA5555	14407.9	23048.4	20896.6	9259.5	22060.1	18999.8	19451	16773.1	0.213692	0.535328	0.731543	atpG	NC_002516.2	6249685	6250545	-	861	protein_coding	ATP synthase subunit gamma&&sp|A6VF33|ATPG_PSEA7 ATP synthase gamma chain OS=Pseudomonas aeruginosa (strain PA7) OX=381754 GN=atpG PE=3 SV=1 && PF00231:ATP synthase	-	NOT_CHANGE
PA5554	42001.3	65225.1	61071.2	35331	60441.9	64655.5	56099.2	53476.1	0.0690878	0.813875	0.909556	atpD	NC_002516.2	6248278	6249654	-	1377	protein_coding	ATP synthase subunit beta&&sp|A6VF32|ATPB_PSEA7 ATP synthase subunit beta OS=Pseudomonas aeruginosa (strain PA7) OX=381754 GN=atpD PE=3 SV=1 && PF02874:ATP synthase alpha/beta family, beta-barrel domain|PF00006:ATP synthase alpha/beta family, nucleotide-binding domain	ATP-synt_ab	NOT_CHANGE
PA5553	5212.7	7784.15	7189.78	4442.93	6774.16	6861.54	6728.88	6026.21	0.159137	0.53575	0.731841	atpC	NC_002516.2	6247811	6248236	-	426	protein_coding	ATP synthase subunit epsilon&&sp|A6VF31|ATPE_PSEA7 ATP synthase epsilon chain OS=Pseudomonas aeruginosa (strain PA7) OX=381754 GN=atpC PE=3 SV=1 && PF02823:ATP synthase, Delta/Epsilon chain, beta-sandwich domain|PF00401:ATP synthase, Delta/Epsilon chain, long alpha-helix domain	-	NOT_CHANGE
PA5552	3228.37	3358.69	3225.93	2074.95	2603.61	2914.24	3271	2530.93	0.370187	0.0466684	0.177004	glmU	NC_002516.2	6246326	6247690	-	1365	protein_coding	bifunctional glucosamine-1-phosphate acetyltransferase/N-acetylglucosamine-1-phosphate uridyltransferase&&sp|B7V789|GLMU_PSEA8 Bifunctional protein GlmU OS=Pseudomonas aeruginosa (strain LESB58) OX=557722 GN=glmU PE=3 SV=1 && PF00132:Bacterial transferase hexapeptide (six repeats)|PF12804:MobA-like NTP transferase domain	Hexapep	NOT_CHANGE
PA5551	500.767	551.471	557.837	407.782	455.87	449.799	536.692	437.817	0.293858	0.0670223	0.217304	PA5551	NC_002516.2	6245803	6246312	-	510	protein_coding	hypothetical protein&&-- && PF01551:Peptidase family M23	Peptidase_M23	NOT_CHANGE
PA5550	296.714	222.935	193.535	189.666	228.889	191.27	237.728	203.275	0.226003	0.342022	0.574363	glmR	NC_002516.2	6244962	6245735	-	774	protein_coding	GlmR transcriptional regulator&&sp|P15082|SRLR_ECOLI Glucitol operon repressor OS=Escherichia coli (strain K12) OX=83333 GN=srlR PE=1 SV=1 && PF00455:DeoR C terminal sensor domain|PF08220:DeoR-like helix-turn-helix domain	DeoR	NOT_CHANGE
PA5549	1637.35	1785.44	1723.19	862.033	1473.47	1300	1715.32	1211.84	0.501371	0.0352736	0.148827	glmS	NC_002516.2	6243111	6244946	-	1836	protein_coding	glucosamine--fructose-6-phosphate aminotransferase&&sp|Q9HT25|GLMS_PSEAE Glutamine--fructose-6-phosphate aminotransferase [isomerizing] OS=Pseudomonas aeruginosa (strain ATCC 15692 / DSM 22644 / CIP 104116 / JCM 14847 / LMG 12228 / 1C / PRS 101 / PAO1) OX=208964 GN=glmS PE=3 SV=3 && PF13522:Glutamine amidotransferase domain|PF01380:SIS domain	SIS	NOT_CHANGE
PA5548	234.611	250.313	215.269	188.718	222.213	184.964	233.398	198.632	0.232467	0.226286	0.454995	PA5548	NC_002516.2	6241851	6243056	+	1206	protein_coding	major facilitator superfamily transporter&&-- && PF07690:Major Facilitator Superfamily	MFS_1	NOT_CHANGE
PA5547	811.281	779.295	875.566	877.206	885.037	724.093	822.047	828.779	-0.0122179	0.942641	0.970758	PA5547	NC_002516.2	6240870	6241493	+	624	protein_coding	hypothetical protein&&sp|P0CAV6|CICA_CAUVC Protein CicA OS=Caulobacter vibrioides (strain ATCC 19089 / CB15) OX=190650 GN=cicA PE=4 SV=1 && PF12710:haloacid dehalogenase-like hydrolase	-	NOT_CHANGE
PA5546	2190.36	3044.82	2824.37	3697.54	2740.94	3125.47	2686.52	3187.99	-0.246928	0.246095	0.476367	PA5546	NC_002516.2	6239448	6240632	-	1185	protein_coding	hypothetical protein&&sp|P31049|FAMT_PSEPU Probable fatty acid methyltransferase OS=Pseudomonas putida OX=303 PE=3 SV=1 && PF02353:Mycolic acid cyclopropane synthetase	-	NOT_CHANGE
PA5545	777.765	1067.74	1111.53	1912.78	1377.15	1420.86	985.68	1570.26	-0.671967	0.00399764	0.035988	PA5545	NC_002516.2	6238325	6239284	-	960	protein_coding	hypothetical protein&&sp|P0A3T3|BCSP_BRUAB 31 kDa immunogenic protein OS=Brucella abortus biovar 1 (strain 9-941) OX=262698 GN=bcsP31 PE=4 SV=1 && PF16868:NMT1-like family	-	NOT_CHANGE
PA5544	168.565	332.447	357.057	460.889	350.963	320.534	286.023	377.462	-0.400722	0.210686	0.436851	PA5544	NC_002516.2	6236226	6238250	-	2025	protein_coding	hypothetical protein&&-- && PF06808:Tripartite ATP-independent periplasmic transporter, DctM component	-	NOT_CHANGE
PA5543	25.6298	39.1114	34.1533	50.2615	41.963	27.3243	32.9648	39.8496	-0.277864	0.441091	0.660091	PA5543	NC_002516.2	6235831	6236229	-	399	protein_coding	hypothetical protein&&-- && PF08905:Domain of unknown function (DUF1850)	-	NOT_CHANGE
PA5542	260.241	326.58	262.877	492.184	335.704	264.835	283.233	364.241	-0.363443	0.18931	0.408982	PA5542	NC_002516.2	6234500	6235744	-	1245	protein_coding	hypothetical protein&&-- && PF00144:Beta-lactamase	Beta-lactamase	NOT_CHANGE
PA5541	55.2026	45.9559	39.328	52.1582	41.963	36.7826	46.8289	43.6346	0.100498	0.742987	0.870199	pyrQ	NC_002516.2	6233118	6234455	+	1338	protein_coding	dihydroorotase&&sp|O27199|PYRC_METTH Dihydroorotase OS=Methanothermobacter thermautotrophicus (strain ATCC 29096 / DSM 1053 / JCM 10044 / NBRC 100330 / Delta H) OX=187420 GN=pyrC PE=3 SV=2 && PF01979:Amidohydrolase family	Amidohydro_1	NOT_CHANGE
PA5540	14.7864	13.689	14.4893	14.225	12.3981	6.3056	14.3216	10.9762	0.374011	0.455807	1	PA5540	NC_002516.2	6232555	6233115	+	561	protein_coding	hypothetical protein&&-- && PF00132:Bacterial transferase hexapeptide (six repeats)	Hexapep	NOT_CHANGE
PA5539	16.7579	17.6001	3.10484	14.225	9.53703	12.6112	12.4876	12.1244	0.0485334	0.937689	1	PA5539	NC_002516.2	6231662	6232558	+	897	protein_coding	GTP cyclohydrolase&&sp|B7V776|GCH4_PSEA8 GTP cyclohydrolase FolE2 OS=Pseudomonas aeruginosa (strain LESB58) OX=557722 GN=folE2 PE=3 SV=1 && PF02649:Type I GTP cyclohydrolase folE2	-	NOT_CHANGE
PA5538	25.6298	41.067	48.6426	39.8299	42.9167	45.1901	38.4464	42.6456	-0.150564	0.653443	0.815232	amiA	NC_002516.2	6230369	6231562	-	1194	protein_coding	N-acetylmuramoyl-L-alanine amidase&&sp|P26366|AMIB_SALTY N-acetylmuramoyl-L-alanine amidase AmiB OS=Salmonella typhimurium (strain LT2 / SGSC1412 / ATCC 700720) OX=99287 GN=amiB PE=3 SV=2 && PF11741:AMIN domain|PF01520:N-acetylmuramoyl-L-alanine amidase	-	NOT_CHANGE
PA5537	148.85	123.201	142.823	155.526	133.518	118.755	138.291	135.933	0.0232505	0.915903	0.959059	PA5537	NC_002516.2	6229975	6230391	+	417	protein_coding	hypothetical protein&&-- && -	-	NOT_CHANGE
PA5536	14.7864	13.689	14.4893	11.38	5.72222	4.20373	14.3216	7.10197	1.00087	0.0743293	1	PA5536	NC_002516.2	6229458	6229862	-	405	protein_coding	hypothetical protein&&sp|P0CAU3|DKSA_CAUVC RNA polymerase-binding transcription factor DksA OS=Caulobacter vibrioides (strain ATCC 19089 / CB15) OX=190650 GN=dksA PE=3 SV=1 && PF01258:Prokaryotic dksA/traR C4-type zinc finger	zf-dskA_traR	NOT_CHANGE
PA5535	138.007	152.535	133.508	147.94	139.241	118.755	141.35	135.312	0.0619634	0.767137	0.883889	PA5535	NC_002516.2	6228241	6229443	-	1203	protein_coding	hypothetical protein&&sp|P31521|P47K_PSECL 47 kDa protein OS=Pseudomonas chlororaphis OX=333 PE=3 SV=1 && PF07683:Cobalamin synthesis protein cobW C-terminal domain|PF02492:CobW/HypB/UreG, nucleotide-binding domain	-	NOT_CHANGE
PA5534	77.8751	81.1562	63.1318	71.1248	52.4537	44.1392	74.0544	55.9059	0.403487	0.163435	0.375942	PA5534	NC_002516.2	6227603	6228244	-	642	protein_coding	hypothetical protein&&-- && PF08856:Protein of unknown function (DUF1826)	-	NOT_CHANGE
PA5533	146.878	115.379	124.194	128.973	131.611	124.01	128.817	128.198	0.00668417	0.974823	0.988249	PA5533	NC_002516.2	6227082	6227450	+	369	protein_coding	hypothetical protein&&-- && -	-	NOT_CHANGE
PA5532	273.056	246.402	250.457	234.238	238.426	277.446	256.638	250.037	0.0385449	0.832393	0.918397	PA5532	NC_002516.2	6226018	6226979	-	962	protein_coding	--&&sp|P33030|YEIR_ECOLI Zinc-binding GTPase YeiR OS=Escherichia coli (strain K12) OX=83333 GN=yeiR PE=1 SV=2 && PF02492:CobW/HypB/UreG, nucleotide-binding domain|PF07683:Cobalamin synthesis protein cobW C-terminal domain	-	NOT_CHANGE
PA5531	176.451	227.824	255.632	382.177	329.981	405.66	219.969	372.606	-0.760499	0.000504726	0.00773042	tonB1	NC_002516.2	6224897	6225925	-	1029	protein_coding	transporter TonB&&sp|Q51368|TONB_PSEAE Protein TonB OS=Pseudomonas aeruginosa (strain ATCC 15692 / DSM 22644 / CIP 104116 / JCM 14847 / LMG 12228 / 1C / PRS 101 / PAO1) OX=208964 GN=tonB PE=1 SV=2 && PF03544:Gram-negative bacterial TonB protein C-terminal	-	NOT_CHANGE
PA5530	249.398	377.425	450.202	2516.87	4214.42	1633.15	359.008	2788.15	-2.95745	2.03e-15	7.36e-13	PA5530	NC_002516.2	6223174	6224481	+	1308	protein_coding	MFS dicarboxylate transporter&&sp|P0AEX3|KGTP_ECOLI Alpha-ketoglutarate permease OS=Escherichia coli (strain K12) OX=83333 GN=kgtP PE=1 SV=1 && PF07690:Major Facilitator Superfamily	MFS_1	DOWN
PA5529	1096.17	867.296	964.572	1542.93	1545.95	1184.4	976.011	1424.43	-0.545623	0.00575525	0.046374	PA5529	NC_002516.2	6221101	6222858	+	1758	protein_coding	sodium/proton antiporter&&sp|P39830|YBAL_ECOLI Putative cation/proton antiporter YbaL OS=Escherichia coli (strain K12) OX=83333 GN=ybaL PE=1 SV=2 && PF00999:Sodium/hydrogen exchanger family	Na_H_Exchanger	NOT_CHANGE
PA5528	3844.47	3217.89	3177.29	5093.49	5492.38	3881.09	3413.22	4822.32	-0.498646	0.0144761	0.0853369	PA5528	NC_002516.2	6219885	6220739	-	855	protein_coding	hypothetical protein&&-- && PF04280:Tim44-like domain	-	NOT_CHANGE
PA5527	467.251	498.671	462.622	486.494	556.009	509.702	476.181	517.402	-0.119734	0.450214	0.667296	PA5527	NC_002516.2	6219287	6219688	-	402	protein_coding	hypothetical protein&&-- && PF14567:SMI1-KNR4 cell-wall	-	NOT_CHANGE
PA5526	993.647	1221.25	1044.26	1944.08	1439.14	1164.43	1086.39	1515.88	-0.480772	0.0458972	0.175755	PA5526	NC_002516.2	6218857	6219069	-	213	protein_coding	hypothetical protein&&-- && PF06004:Bacterial protein of unknown function (DUF903)	-	NOT_CHANGE
PA5525	520.482	570.049	471.936	759.613	629.444	625.305	520.822	671.454	-0.366516	0.0434054	0.169483	PA5525	NC_002516.2	6218100	6218840	+	741	protein_coding	transcriptional regulator&&-- && PF00392:Bacterial regulatory proteins, gntR family|PF07729:FCD domain	FCD	NOT_CHANGE
PA5524	363.746	403.825	378.791	465.631	499.741	358.368	382.121	441.246	-0.20822	0.298416	0.530853	PA5524	NC_002516.2	6217313	6218095	+	783	protein_coding	short-chain dehydrogenase&&sp|P0AEK2|FABG_ECOLI 3-oxoacyl-[acyl-carrier-protein] reductase FabG OS=Escherichia coli (strain K12) OX=83333 GN=fabG PE=1 SV=1 && PF13561:Enoyl-(Acyl carrier protein) reductase	-	NOT_CHANGE
PA5523	596.385	788.095	712.044	923.674	1107.25	800.811	698.842	943.912	-0.433919	0.0393411	0.159206	PA5523	NC_002516.2	6215803	6217155	-	1353	protein_coding	aminotransferase&&sp|A9GDD3|GSA_SORC5 Glutamate-1-semialdehyde 2,1-aminomutase OS=Sorangium cellulosum (strain So ce56) OX=448385 GN=hemL PE=3 SV=1 && PF00202:Aminotransferase class-III	Aminotran_3	NOT_CHANGE
PA5522	507.667	532.893	516.439	843.066	815.416	615.847	519	758.11	-0.54711	0.00448415	0.0392058	PA5522	NC_002516.2	6214434	6215801	-	1368	protein_coding	glutamine synthetase&&sp|P78061|PUUA_ECOLI Gamma-glutamylputrescine synthetase PuuA OS=Escherichia coli (strain K12) OX=83333 GN=puuA PE=1 SV=2 && PF00120:Glutamine synthetase, catalytic domain	-	NOT_CHANGE
PA5521	1334.72	1062.85	1035.98	1940.29	1236	1065.65	1144.52	1413.98	-0.30515	0.263848	0.495226	PA5521	NC_002516.2	6213581	6214339	-	759	protein_coding	short-chain dehydrogenase&&sp|Q9X248|FABG_THEMA 3-oxoacyl-[acyl-carrier-protein] reductase FabG OS=Thermotoga maritima (strain ATCC 43589 / DSM 3109 / JCM 10099 / NBRC 100826 / MSB8) OX=243274 GN=fabG PE=3 SV=1 && PF13561:Enoyl-(Acyl carrier protein) reductase	-	NOT_CHANGE
PA5520	342.059	421.426	395.35	455.199	394.833	391.998	386.278	414.01	-0.100325	0.581524	0.765027	PA5520	NC_002516.2	6212790	6213533	+	744	protein_coding	hypothetical protein&&-- && -	-	NOT_CHANGE
PA5519	315.444	322.669	251.492	312.001	308.046	269.039	296.535	296.362	0.000779013	0.996822	0.997921	PA5519	NC_002516.2	6212147	6212713	-	567	protein_coding	acyl-CoA thioesterase&&sp|P0A0Q8|VDLD_HELPJ Protein VdlD OS=Helicobacter pylori (strain J99 / ATCC 700824) OX=85963 GN=vdlD PE=3 SV=1 && PF03061:Thioesterase superfamily	4HBT	NOT_CHANGE
PA5518	758.05	724.539	734.813	953.073	862.148	889.089	739.134	901.437	-0.286443	0.047505	0.177842	PA5518	NC_002516.2	6210065	6211768	-	1704	protein_coding	potassium efflux transporter&&sp|P39830|YBAL_ECOLI Putative cation/proton antiporter YbaL OS=Escherichia coli (strain K12) OX=83333 GN=ybaL PE=1 SV=2 && PF02254:TrkA-N domain|PF00999:Sodium/hydrogen exchanger family	Na_H_Exchanger	NOT_CHANGE
PA5517	267.141	243.469	254.597	238.031	313.768	294.261	255.069	282.02	-0.144614	0.458777	0.67457	PA5517	NC_002516.2	6209479	6210063	-	585	protein_coding	hypothetical protein&&-- && PF09335:SNARE associated Golgi protein	-	NOT_CHANGE
PA5516	592.442	484.004	566.117	567.102	525.491	538.078	547.521	543.557	0.0103193	0.951104	0.975092	pdxY	NC_002516.2	6208575	6209441	+	867	protein_coding	pyridoxamine kinase&&sp|Q9HT57|PDXY_PSEAE Pyridoxal kinase PdxY OS=Pseudomonas aeruginosa (strain ATCC 15692 / DSM 22644 / CIP 104116 / JCM 14847 / LMG 12228 / 1C / PRS 101 / PAO1) OX=208964 GN=pdxY PE=1 SV=1 && PF08543:Phosphomethylpyrimidine kinase	-	NOT_CHANGE
PA5515	387.404	382.314	404.665	403.989	381.481	352.062	391.461	379.178	0.045389	0.77953	0.888906	PA5515	NC_002516.2	6208042	6208542	-	501	protein_coding	hypothetical protein&&-- && PF11743:Protein of unknown function (DUF3301)	-	NOT_CHANGE
PA5514	114.348	98.7563	99.355	110.955	134.472	94.5839	104.153	113.337	-0.123359	0.60543	0.78239	PA5514	NC_002516.2	6207241	6208029	+	789	protein_coding	beta-lactamase&&sp|B3U538|BL133_ACIRA Beta-lactamase OXA-133 OS=Acinetobacter radioresistens OX=40216 GN=blaOXA-133 PE=2 SV=1 && PF00905:Penicillin binding protein transpeptidase domain	-	NOT_CHANGE
PA5513	148.85	173.068	163.522	173.545	167.852	193.372	161.813	178.256	-0.138782	0.475541	0.688903	poxA	NC_002516.2	6206292	6207170	+	879	protein_coding	hypothetical protein&&-- && PF12697:Alpha/beta hydrolase family	-	NOT_CHANGE
PA5512	346.988	251.291	291.855	181.131	242.241	208.085	296.711	210.486	0.495298	0.0269002	0.124701	mifS	NC_002516.2	6204444	6206210	-	1767	protein_coding	sensor histidine kinase MifS&&sp|P10047|DCTB_RHILE C4-dicarboxylate transport sensor protein DctB OS=Rhizobium leguminosarum OX=384 GN=dctB PE=3 SV=1 && PF02518:Histidine kinase-, DNA gyrase B-, and HSP90-like ATPase|PF00512:His Kinase A (phospho-acceptor) domain	HATPase_c	NOT_CHANGE
PA5511	706.791	737.25	747.232	427.697	673.315	642.12	730.424	581.044	0.33033	0.142547	0.345363	mifR	NC_002516.2	6203104	6204447	-	1344	protein_coding	DNA-binding response regulator MifR&&sp|Q9HU19|DCTD_PSEAE C4-dicarboxylate transport transcriptional regulatory protein DctD OS=Pseudomonas aeruginosa (strain ATCC 15692 / DSM 22644 / CIP 104116 / JCM 14847 / LMG 12228 / 1C / PRS 101 / PAO1) OX=208964 GN=dctD PE=3 SV=1 && PF00158:Sigma-54 interaction domain|PF02954:Bacterial regulatory protein, Fis family|PF00072:Response regulator receiver domain	Sigma54_activat	NOT_CHANGE
PA5510	62.1029	85.0673	113.844	75.8665	69.6204	67.2597	87.0049	70.9155	0.293032	0.318156	0.550857	PA5510	NC_002516.2	6201736	6203085	+	1350	protein_coding	transporter&&sp|P76037|PUUP_ECOLI Putrescine importer PuuP OS=Escherichia coli (strain K12) OX=83333 GN=puuP PE=1 SV=2 && PF00324:Amino acid permease	AA_permease	NOT_CHANGE
PA5509	34.5016	45.9559	33.1183	23.7083	48.6389	31.528	37.8586	34.625	0.128866	0.729928	0.865271	PA5509	NC_002516.2	6200966	6201634	+	669	protein_coding	hypothetical protein&&-- && PF05013:N-formylglutamate amidohydrolase	-	NOT_CHANGE
PA5508	60.1314	49.8671	70.3765	33.1916	72.4815	32.5789	60.125	46.084	0.380404	0.323329	0.555401	PA5508	NC_002516.2	6199567	6200898	+	1332	protein_coding	glutamine synthetase&&sp|O29313|GLNA_ARCFU Glutamine synthetase OS=Archaeoglobus fulgidus (strain ATCC 49558 / VC-16 / DSM 4304 / JCM 9628 / NBRC 100126) OX=224325 GN=glnA PE=1 SV=1 && PF16952:Glutamine synthetase N-terminal domain|PF00120:Glutamine synthetase, catalytic domain	-	NOT_CHANGE
PA5507	38.4447	62.5783	37.2581	31.2949	49.5926	45.1901	46.0937	42.0259	0.135848	0.698771	0.841522	PA5507	NC_002516.2	6198917	6199570	+	654	protein_coding	hypothetical protein&&-- && PF00857:Isochorismatase family	Isochorismatase	NOT_CHANGE
PA5506	34.5016	41.067	30.0135	20.8633	53.4074	21.0187	35.194	31.7631	0.145573	0.743192	0.870199	PA5506	NC_002516.2	6198055	6198912	+	858	protein_coding	hypothetical protein&&-- && PF01418:Helix-turn-helix domain, rpiR family|PF01380:SIS domain	SIS	NOT_CHANGE
PA5505	3903.61	5263.42	4978.1	2352.81	4402.3	4430.73	4715.04	3728.61	0.338673	0.239562	0.469712	PA5505	NC_002516.2	6197070	6197852	+	783	protein_coding	TonB-dependent receptor&&sp|Q9CK95|METQ_PASMU Probable D-methionine-binding lipoprotein MetQ OS=Pasteurella multocida (strain Pm70) OX=272843 GN=metQ PE=3 SV=1 && PF03180:NLPA lipoprotein	-	NOT_CHANGE
PA5504	669.332	589.605	624.074	242.773	451.102	548.587	627.67	414.154	0.600416	0.0494749	0.181842	PA5504	NC_002516.2	6196316	6196993	+	678	protein_coding	D-methionine ABC transporter&&sp|Q9KTJ6|METI_VIBCH Probable D-methionine transport system permease protein MetI OS=Vibrio cholerae serotype O1 (strain ATCC 39315 / El Tor Inaba N16961) OX=243277 GN=metI PE=3 SV=1 && PF00528:Binding-protein-dependent transport system inner membrane component	BPD_transp_1	NOT_CHANGE
PA5503	939.43	643.383	745.163	325.278	530.259	677.852	775.992	511.129	0.602829	0.0477877	0.17806	PA5503	NC_002516.2	6195309	6196316	+	1008	protein_coding	ABC transporter ATP-binding protein&&sp|Q02DK6|METN2_PSEAB Methionine import ATP-binding protein MetN 2 OS=Pseudomonas aeruginosa (strain UCBPP-PA14) OX=208963 GN=metN2 PE=3 SV=1 && PF00005:ABC transporter|PF09383:NIL domain	ABC_tran	NOT_CHANGE
PA5502	213.91	221.957	210.094	118.541	145.917	222.798	215.321	162.419	0.408853	0.136085	0.334739	PA5502	NC_002516.2	6194314	6195102	+	789	protein_coding	hypothetical protein&&-- && -	-	NOT_CHANGE
PA5501	269.113	226.846	205.955	185.873	163.083	183.913	233.971	177.623	0.398188	0.0504965	0.183536	znuB	NC_002516.2	6193484	6194272	+	789	protein_coding	zinc ABC transporter permease&&sp|P44691|ZNUB_HAEIN High-affinity zinc uptake system membrane protein ZnuB OS=Haemophilus influenzae (strain ATCC 51907 / DSM 11121 / KW20 / Rd) OX=71421 GN=znuB PE=3 SV=1 && PF00950:ABC 3 transport family	ABC-3	NOT_CHANGE
PA5500	521.468	569.071	516.439	431.491	293.741	325.789	535.659	350.34	0.612285	0.00375156	0.0345182	znuC	NC_002516.2	6192682	6193491	+	810	protein_coding	zinc transporter ZnuC&&sp|Q02DK9|ZNUC_PSEAB Zinc import ATP-binding protein ZnuC OS=Pseudomonas aeruginosa (strain UCBPP-PA14) OX=208963 GN=znuC PE=3 SV=1 && PF00005:ABC transporter	ABC_tran	NOT_CHANGE
PA5499	889.156	774.406	845.553	603.138	535.028	692.565	836.372	610.244	0.455173	0.0112227	0.0721723	np20	NC_002516.2	6192179	6192682	+	504	protein_coding	transcriptional regulator&&sp|P0AC51|ZUR_ECOLI Zinc uptake regulation protein OS=Escherichia coli (strain K12) OX=83333 GN=zur PE=1 SV=1 && PF01475:Ferric uptake regulator family	FUR	NOT_CHANGE
PA5498	622.015	491.826	515.404	385.022	370.037	334.197	543.082	363.085	0.5805	0.0016791	0.0193363	PA5498	NC_002516.2	6191186	6192109	-	924	protein_coding	adhesin&&sp|Q8ZEU2|ZNUA_YERPE High-affinity zinc uptake system protein ZnuA OS=Yersinia pestis OX=632 GN=znuA PE=3 SV=1 && PF01297:Zinc-uptake complex component A periplasmic	-	NOT_CHANGE
PA5497	14606	7410.64	6554.33	3081.13	6121.82	7464.78	9523.66	5555.91	0.777525	0.0526379	0.188012	nrdJa	NC_002516.2	6188872	6191076	-	2205	protein_coding	ribonucleoside-diphosphate reductase&&sp|Q9HI70|NDRZ_THEAC Vitamin B12-dependent ribonucleoside-diphosphate reductase OS=Thermoplasma acidophilum (strain ATCC 25905 / DSM 1728 / JCM 9062 / NBRC 15155 / AMRC-C165) OX=273075 GN=Ta1475 PE=1 SV=2 && PF02867:Ribonucleotide reductase, barrel domain	Ribonuc_red_lgC	NOT_CHANGE
PA5496	3731.11	1684.72	1422.02	915.139	1529.74	2148.11	2279.28	1531	0.574236	0.175637	0.390488	nrdJb	NC_002516.2	6188166	6188855	-	690	protein_coding	hypothetical protein&&-- && -	-	NOT_CHANGE
PA5495	8516.98	10983.5	9519.45	6109.15	8629.11	9055.89	9673.3	7931.38	0.286464	0.195556	0.417559	thrB	NC_002516.2	6186927	6187877	+	951	protein_coding	homoserine kinase&&sp|P29364|KHSE_PSEAE Homoserine kinase OS=Pseudomonas aeruginosa (strain ATCC 15692 / DSM 22644 / CIP 104116 / JCM 14847 / LMG 12228 / 1C / PRS 101 / PAO1) OX=208964 GN=thrB PE=3 SV=2 && PF01636:Phosphotransferase enzyme family	APH	NOT_CHANGE
PA5494	6025.96	8213.4	7298.45	5781.97	7182.34	7915.63	7179.27	6959.98	0.0447854	0.830944	0.918269	PA5494	NC_002516.2	6186603	6186893	+	291	protein_coding	hypothetical protein&&-- && PF11191:Protein of unknown function (DUF2782)	-	NOT_CHANGE
PA5493	4189.48	3511.23	3335.64	2232.37	2766.69	3051.91	3678.78	2683.66	0.455136	0.0221459	0.111263	polA	NC_002516.2	6183784	6186525	-	2742	protein_coding	DNA polymerase I&&sp|Q9HT80|DPO1_PSEAE DNA polymerase I OS=Pseudomonas aeruginosa (strain ATCC 15692 / DSM 22644 / CIP 104116 / JCM 14847 / LMG 12228 / 1C / PRS 101 / PAO1) OX=208964 GN=polA PE=3 SV=1 && PF01367:5'-3' exonuclease, C-terminal SAM fold|PF01612:3'-5' exonuclease|PF02739:5'-3' exonuclease, N-terminal resolvase-like domain|PF00476:DNA polymerase family A	3_5_exonuc	NOT_CHANGE
PA5492	1729.02	1796.19	1704.56	1193.95	1719.53	1688.85	1743.26	1534.11	0.184516	0.361198	0.589232	PA5492	NC_002516.2	6182873	6183520	+	648	protein_coding	ribosome biogenesis GTP-binding protein YsxC&&sp|Q9HT81|ENGB_PSEAE Probable GTP-binding protein EngB OS=Pseudomonas aeruginosa (strain ATCC 15692 / DSM 22644 / CIP 104116 / JCM 14847 / LMG 12228 / 1C / PRS 101 / PAO1) OX=208964 GN=engB PE=3 SV=1 && PF01926:50S ribosome-binding GTPase	-	NOT_CHANGE
PA5491	1230.23	1073.61	1217.1	715.99	1000.43	1349.4	1173.65	1021.94	0.199977	0.444381	0.662806	PA5491	NC_002516.2	6182396	6182689	-	294	protein_coding	cytochrome&&sp|Q8KG93|C555_CHLTE Cytochrome c-555 OS=Chlorobaculum tepidum (strain ATCC 49652 / DSM 12025 / NBRC 103806 / TLS) OX=194439 GN=CT0075 PE=1 SV=1 && PF13442:Cytochrome C oxidase, cbb3-type, subunit III	-	NOT_CHANGE
PA5490	4203.29	3506.34	3742.37	1833.12	2741.9	3518.52	3817.33	2697.85	0.500865	0.0596528	0.203462	cc4	NC_002516.2	6181745	6182350	-	606	protein_coding	cytochrome C4&&sp|P00106|CYC4_PSEAE Cytochrome c4 OS=Pseudomonas aeruginosa (strain ATCC 15692 / DSM 22644 / CIP 104116 / JCM 14847 / LMG 12228 / 1C / PRS 101 / PAO1) OX=208964 GN=cc4 PE=1 SV=3 && PF00034:Cytochrome c	-	NOT_CHANGE
PA5489	4203.29	4252.39	4030.09	4191.62	4153.38	3718.2	4161.92	4021.07	0.0496206	0.721595	0.85932	dsbA	NC_002516.2	6180942	6181577	-	636	protein_coding	thiol:disulfide interchange protein DsbA&&sp|Q02DM0|DSBA_PSEAB Thiol:disulfide interchange protein DsbA OS=Pseudomonas aeruginosa (strain UCBPP-PA14) OX=208963 GN=dsbA PE=3 SV=1 && PF01323:DSBA-like thioredoxin domain	DSBA	NOT_CHANGE
PA5488	2825.19	2632.2	2400.04	2165.04	2149.65	2383.52	2619.14	2232.73	0.230416	0.130839	0.326654	PA5488	NC_002516.2	6180048	6180926	-	879	protein_coding	hypothetical protein&&-- && PF03372:Endonuclease/Exonuclease/phosphatase family	Exo_endo_phos	NOT_CHANGE
PA5487	2707.89	2204.91	2203.4	1808.47	1938.88	2018.84	2372.07	1922.06	0.303582	0.0701525	0.222681	PA5487	NC_002516.2	6178036	6180051	-	2016	protein_coding	hypothetical protein&&sp|Q9HT84|DGCP_PSEAE Diguanylate cyclase DgcP OS=Pseudomonas aeruginosa (strain ATCC 15692 / DSM 22644 / CIP 104116 / JCM 14847 / LMG 12228 / 1C / PRS 101 / PAO1) OX=208964 GN=dgcP PE=1 SV=1 && PF00990:Diguanylate cyclase, GGDEF domain	GGDEF	NOT_CHANGE
PA5486	133.078	135.912	121.089	103.368	134.472	147.131	130.026	128.324	0.0208789	0.927592	0.965008	PA5486	NC_002516.2	6177325	6177918	-	594	protein_coding	hypothetical protein&&sp|P67144|YHGN_ECO57 UPF0056 inner membrane protein YhgN OS=Escherichia coli O157:H7 OX=83334 GN=yhgN PE=3 SV=1 && PF01914:MarC family integral membrane protein	-	NOT_CHANGE
PA5485	400.219	382.314	375.686	322.433	315.676	326.84	386.073	321.649	0.263602	0.0926618	0.268188	ampDh2	NC_002516.2	6176516	6177295	-	780	protein_coding	protein AmpDh2&&sp|P75820|AMID_ECOLI N-acetylmuramoyl-L-alanine amidase AmiD OS=Escherichia coli (strain K12) OX=83333 GN=amiD PE=1 SV=1 && PF01510:N-acetylmuramoyl-L-alanine amidase|PF01471:Putative peptidoglycan binding domain	PG_binding_1	NOT_CHANGE
PA5484	1130.67	922.052	863.147	1112.39	986.129	993.131	971.955	1030.55	-0.0844262	0.64342	0.807908	PA5484	NC_002516.2	6174694	6176481	+	1788	protein_coding	two-component sensor&&sp|O34206|KINB_PSEAI Alginate biosynthesis sensor protein KinB OS=Pseudomonas aeruginosa OX=287 GN=kinB PE=1 SV=1 && PF02518:Histidine kinase-, DNA gyrase B-, and HSP90-like ATPase|PF00512:His Kinase A (phospho-acceptor) domain|PF16767:Sensor domain of alginate biosynthesis sensor protein KinB|PF00672:HAMP domain|PF08448:PAS fold	HATPase_c	NOT_CHANGE
PA5483	1245.02	1188.01	1167.42	1845.45	1681.38	1551.18	1200.15	1692.67	-0.496204	0.00111596	0.0142074	algB	NC_002516.2	6173348	6174697	+	1350	protein_coding	two-component response regulator AlgB&&sp|P23747|ALGB_PSEAE Alginate biosynthesis transcriptional regulatory protein AlgB OS=Pseudomonas aeruginosa (strain ATCC 15692 / DSM 22644 / CIP 104116 / JCM 14847 / LMG 12228 / 1C / PRS 101 / PAO1) OX=208964 GN=algB PE=1 SV=1 && PF02954:Bacterial regulatory protein, Fis family|PF00158:Sigma-54 interaction domain|PF00072:Response regulator receiver domain	Sigma54_activat	NOT_CHANGE
PA5482	57.1741	69.4228	43.4678	116.645	89.6481	80.9218	56.6882	95.7382	-0.755728	0.00949922	0.0640348	PA5482	NC_002516.2	6172712	6172873	-	162	protein_coding	hypothetical protein&&-- && PF07043:Protein of unknown function (DUF1328)	-	NOT_CHANGE
PA5481	112.377	120.268	104.53	161.216	121.12	109.297	112.391	130.545	-0.217116	0.370199	0.597844	PA5481	NC_002516.2	6172223	6172690	-	468	protein_coding	hypothetical protein&&sp|Q9HT89|YID1_PSEAE Uncharacterized protein PA5481 OS=Pseudomonas aeruginosa (strain ATCC 15692 / DSM 22644 / CIP 104116 / JCM 14847 / LMG 12228 / 1C / PRS 101 / PAO1) OX=208964 GN=PA5481 PE=3 SV=1 && PF08816:Inhibitor of vertebrate lysozyme (Ivy)	-	NOT_CHANGE
PA5479	1421.47	1435.39	1444.79	549.084	1141.58	1377.77	1433.88	1022.81	0.487602	0.135572	0.333843	gltP	NC_002516.2	6170176	6171510	-	1335	protein_coding	glutamate/aspartate:proton symporter&&sp|P21345|GLTP_ECOLI Proton/glutamate-aspartate symporter OS=Escherichia coli (strain K12) OX=83333 GN=gltP PE=1 SV=2 && PF00375:Sodium:dicarboxylate symporter family	SDF	NOT_CHANGE
PA5478	395.29	341.247	363.267	355.624	415.815	375.183	366.601	382.207	-0.0602316	0.728079	0.864501	PA5478	NC_002516.2	6168842	6170071	-	1230	protein_coding	hypothetical protein&&sp|P35158|SPMB_BACSU Spore maturation protein B OS=Bacillus subtilis (strain 168) OX=224308 GN=spmB PE=1 SV=2 && PF07670:Nucleoside recognition	-	NOT_CHANGE
PA5477	259.255	298.225	279.436	244.669	254.639	254.326	278.972	251.211	0.151376	0.378125	0.604354	PA5477	NC_002516.2	6167783	6168823	+	1041	protein_coding	hypothetical protein&&-- && PF11141:Protein of unknown function (DUF2914)	-	NOT_CHANGE
PA5476	163.636	181.868	173.871	121.386	112.537	120.857	173.125	118.26	0.550151	0.00476018	0.0408326	citA	NC_002516.2	6166120	6167409	-	1290	protein_coding	citrate transporter&&sp|P07661|CITA_ECOLX Citrate-proton symporter OS=Escherichia coli OX=562 GN=citA PE=3 SV=1 && PF07690:Major Facilitator Superfamily	MFS_1	NOT_CHANGE
PA5475	19236.1	20784.8	19165.2	27550.9	22516	23946.6	19728.7	24671.1	-0.322531	0.0385357	0.157231	PA5475	NC_002516.2	6165417	6165977	-	561	protein_coding	hypothetical protein&&sp|Q9HT95|ATSE4_PSEAE Acetyltransferase PA5475 OS=Pseudomonas aeruginosa (strain ATCC 15692 / DSM 22644 / CIP 104116 / JCM 14847 / LMG 12228 / 1C / PRS 101 / PAO1) OX=208964 GN=PA5475 PE=4 SV=1 && -	-	NOT_CHANGE
PA5474	2224.86	1937.97	1982.96	2278.84	1909.31	2509.63	2048.6	2232.59	-0.123961	0.488606	0.699428	PA5474	NC_002516.2	6164038	6165411	+	1374	protein_coding	metalloprotease&&-- && PF00675:Insulinase (Peptidase family M16)|PF05193:Peptidase M16 inactive domain	-	NOT_CHANGE
PA5473	969.989	1170.41	1195.36	982.471	990.898	1301.05	1111.92	1091.47	0.0270175	0.893073	0.948444	PA5473	NC_002516.2	6162221	6163969	+	1749	protein_coding	hypothetical protein&&sp|P40730|YJBB_SALTY Uncharacterized protein YjbB OS=Salmonella typhimurium (strain LT2 / SGSC1412 / ATCC 700720) OX=99287 GN=yjbB PE=4 SV=2 && PF01895:PhoU domain|PF02690:Na+/Pi-cotransporter	Na_Pi_cotrans	NOT_CHANGE
PA5472	612.158	527.026	571.291	231.393	432.028	583.268	570.158	415.563	0.456906	0.164013	0.376636	PA5472	NC_002516.2	6161067	6161867	-	801	protein_coding	hypothetical protein&&-- && -	-	NOT_CHANGE
PA5471	1015.33	786.14	945.942	839.273	988.99	1187.55	915.805	1005.27	-0.134243	0.524698	0.723002	PA5471	NC_002516.2	6159560	6160699	-	1140	protein_coding	hypothetical protein&&sp|P75675|YKFJ_ECOLI Putative uncharacterized protein YkfJ OS=Escherichia coli (strain K12) OX=83333 GN=ykfJ PE=5 SV=1 && PF01139:tRNA-splicing ligase RtcB	-	NOT_CHANGE
PA5470	167.579	154.49	159.382	139.405	216.491	236.46	160.484	197.452	-0.297991	0.245526	0.476156	PA5470	NC_002516.2	6158949	6159563	-	615	protein_coding	peptide chain release factor-like protein&&sp|P28369|RFH_ECOLI Putative peptide chain release factor homolog OS=Escherichia coli (strain K12) OX=83333 GN=prfH PE=5 SV=2 && PF00472:RF-1 domain	-	NOT_CHANGE
PA5469	35.4874	59.6449	60.027	34.1399	54.3611	56.7504	51.7198	48.4171	0.0965566	0.78095	0.888994	PA5469	NC_002516.2	6158179	6158943	+	765	protein_coding	hypothetical protein&&sp|P43932|Y056_HAEIN UPF0053 protein HI_0056 OS=Haemophilus influenzae (strain ATCC 51907 / DSM 11121 / KW20 / Rd) OX=71421 GN=HI_0056 PE=3 SV=1 && PF03741:Integral membrane protein TerC family	-	NOT_CHANGE
PA5468	98.5761	84.0896	92.1104	106.213	105.861	81.9728	91.592	98.0156	-0.0999077	0.672398	0.826555	PA5468	NC_002516.2	6156854	6158158	+	1305	protein_coding	citrate transporter&&sp|P42308|CITN_BACSU Citrate transporter OS=Bacillus subtilis (strain 168) OX=224308 GN=citN PE=1 SV=2 && PF03600:Citrate transporter	-	NOT_CHANGE
PA5467	139.978	200.446	150.067	218.116	226.028	201.779	163.497	215.308	-0.397056	0.0733897	0.230008	PA5467	NC_002516.2	6156212	6156574	+	363	protein_coding	hypothetical protein&&-- && PF09498:Protein of unknown function (DUF2388)	-	NOT_CHANGE
PA5466	194.195	172.09	180.081	225.703	178.343	203.881	182.122	202.642	-0.154021	0.436629	0.656031	PA5466	NC_002516.2	6155271	6156215	+	945	protein_coding	hypothetical protein&&sp|P56949|MDCF_RHIME Putative malonate transporter OS=Rhizobium meliloti (strain 1021) OX=266834 GN=mdcF PE=3 SV=1 && PF03547:Membrane transport protein	-	NOT_CHANGE
PA5465	260.241	290.402	294.96	383.126	303.278	280.599	281.868	322.334	-0.194335	0.340315	0.572835	PA5465	NC_002516.2	6154784	6155203	-	420	protein_coding	hypothetical protein&&-- && PF04828:Glutathione-dependent formaldehyde-activating enzyme	-	NOT_CHANGE
PA5464	992.661	714.761	722.394	446.664	659.009	607.439	809.939	571.037	0.504437	0.0362683	0.151382	PA5464	NC_002516.2	6152718	6154676	+	1959	protein_coding	hypothetical protein&&-- && PF13387:Domain of unknown function (DUF4105)	-	NOT_CHANGE
PA5463	395.29	307.025	307.38	293.983	287.065	292.159	336.565	291.069	0.209736	0.27337	0.507168	PA5463	NC_002516.2	6152386	6152721	+	336	protein_coding	hypothetical protein&&-- && PF09498:Protein of unknown function (DUF2388)	-	NOT_CHANGE
PA5462	302.629	218.046	200.78	173.545	196.463	214.39	240.485	194.799	0.304937	0.200761	0.424347	PA5462	NC_002516.2	6152064	6152357	+	294	protein_coding	hypothetical protein&&-- && PF09498:Protein of unknown function (DUF2388)	-	NOT_CHANGE
PA5461	2365.83	2781.8	3102.77	3353.3	2379.49	2648.35	2750.13	2793.71	-0.0227492	0.91417	0.958633	PA5461	NC_002516.2	6151622	6151939	+	318	protein_coding	hypothetical protein&&-- && PF09498:Protein of unknown function (DUF2388)	-	NOT_CHANGE
PA5460	91.6758	234.669	223.549	247.514	274.667	159.742	183.298	227.308	-0.311257	0.416786	0.640223	PA5460	NC_002516.2	6151314	6151526	+	213	protein_coding	hypothetical protein&&-- && PF06568:Domain of unknown function (DUF1127)	-	NOT_CHANGE
PA5459	361.774	400.892	343.603	399.247	287.065	215.441	368.756	300.584	0.29408	0.266059	0.498529	PA5459	NC_002516.2	6150315	6151151	+	837	protein_coding	hypothetical protein&&-- && PF08241:Methyltransferase domain	Methyltransf_11	NOT_CHANGE
PA5458	257.284	221.957	229.758	199.15	226.981	172.353	236.333	199.495	0.243471	0.228296	0.457837	PA5458	NC_002516.2	6149179	6150321	+	1143	protein_coding	acyltransferase&&sp|Q2FV54|OATA_STAA8 O-acetyltransferase OatA OS=Staphylococcus aureus (strain NCTC 8325 / PS 47) OX=93061 GN=oatA PE=1 SV=1 && PF01757:Acyltransferase family	-	NOT_CHANGE
PA5457	386.418	315.825	333.253	222.858	286.111	213.339	345.165	240.769	0.519025	0.0133555	0.080888	PA5457	NC_002516.2	6148319	6149182	+	864	protein_coding	hypothetical protein&&sp|Q3SK91|UBIG_THIDA Ubiquinone biosynthesis O-methyltransferase OS=Thiobacillus denitrificans (strain ATCC 25259) OX=292415 GN=ubiG PE=3 SV=1 && PF13489:Methyltransferase domain	-	NOT_CHANGE
PA5456	1068.56	987.563	983.201	801.34	962.287	713.583	1013.11	825.737	0.294749	0.107521	0.290338	PA5456	NC_002516.2	6147021	6148322	+	1302	protein_coding	hypothetical protein&&-- && PF13692:Glycosyl transferases group 1	-	NOT_CHANGE
PA5455	1323.88	1270.14	1351.64	1358.96	1433.42	1123.45	1315.22	1305.27	0.0106758	0.949492	0.974356	PA5455	NC_002516.2	6145399	6147027	+	1629	protein_coding	hypothetical protein&&-- && PF13692:Glycosyl transferases group 1	-	NOT_CHANGE
PA5454	1100.11	1298.5	1198.47	1536.3	1525.93	1117.14	1199.03	1393.12	-0.216686	0.278405	0.512322	rmd	NC_002516.2	6144077	6144991	-	915	protein_coding	oxidoreductase Rmd&&sp|Q9HTB6|RMD_PSEAE GDP-6-deoxy-D-mannose reductase OS=Pseudomonas aeruginosa (strain ATCC 15692 / DSM 22644 / CIP 104116 / JCM 14847 / LMG 12228 / 1C / PRS 101 / PAO1) OX=208964 GN=rmd PE=1 SV=1 && PF16363:GDP-mannose 4,6 dehydratase	-	NOT_CHANGE
PA5453	1207.56	1508.72	1431.33	1589.4	1557.4	1335.74	1382.54	1494.18	-0.112202	0.525182	0.723304	gmd	NC_002516.2	6143109	6144080	-	972	protein_coding	GDP-mannose 4%2C6-dehydratase&&sp|Q51366|GM4D_PSEAE GDP-mannose 4,6-dehydratase OS=Pseudomonas aeruginosa (strain ATCC 15692 / DSM 22644 / CIP 104116 / JCM 14847 / LMG 12228 / 1C / PRS 101 / PAO1) OX=208964 GN=gmd PE=1 SV=2 && PF16363:GDP-mannose 4,6 dehydratase	-	NOT_CHANGE
PA5452	1429.35	1236.9	1216.06	1424.39	1196.9	1102.43	1294.11	1241.24	0.0600248	0.741614	0.870199	wbpW	NC_002516.2	6141666	6143105	-	1440	protein_coding	phosphomannose isomerase/mannose-1-phosphate guanylyl transferase&&sp|B0RVK6|XANB_XANCB Xanthan biosynthesis protein XanB OS=Xanthomonas campestris pv. campestris (strain B100) OX=509169 GN=xanB PE=3 SV=1 && PF00483:Nucleotidyl transferase|PF01050:Mannose-6-phosphate isomerase	-	NOT_CHANGE
PA5451	642.716	419.47	501.95	575.637	402.463	417.22	521.379	465.107	0.164519	0.512391	0.716261	wzm	NC_002516.2	6140869	6141666	-	798	protein_coding	LPS efflux transporter membrane protein&&-- && PF01061:ABC-2 type transporter	ABC2_membrane	NOT_CHANGE
PA5450	912.815	624.805	585.781	825.996	552.194	488.684	707.8	622.291	0.185542	0.516483	0.718959	wzt	NC_002516.2	6139604	6140869	-	1266	protein_coding	ABC transporter&&sp|Q07698|ABCA_AERSA ABC transporter protein AbcA OS=Aeromonas salmonicida OX=645 GN=abcA PE=3 SV=1 && PF14524:Wzt C-terminal domain|PF00005:ABC transporter	ABC_tran	NOT_CHANGE
PA5449	567.798	375.47	405.7	511.15	379.574	284.803	449.656	391.842	0.198028	0.489214	0.699498	wbpX	NC_002516.2	6138225	6139607	-	1383	protein_coding	glycosyltransferase WbpX&&-- && PF00534:Glycosyl transferases group 1	Glycos_transf_1	NOT_CHANGE
PA5448	342.059	274.758	259.772	294.931	238.426	177.608	292.196	236.988	0.301199	0.237266	0.466903	wbpY	NC_002516.2	6137114	6138241	-	1128	protein_coding	glycosyltransferase WbpY&&sp|B1VEI4|MSHA_CORU7 D-inositol 3-phosphate glycosyltransferase OS=Corynebacterium urealyticum (strain ATCC 43042 / DSM 7109) OX=504474 GN=mshA PE=3 SV=1 && PF13439:Glycosyltransferase Family 4|PF00534:Glycosyl transferases group 1	Glycos_transf_1	NOT_CHANGE
PA5447	1089.27	1123.48	1085.66	1126.62	1040.49	1002.59	1099.47	1056.57	0.0572817	0.688902	0.835924	wbpZ	NC_002516.2	6135968	6137113	-	1146	protein_coding	glycosyltransferase WbpZ&&sp|Q9HTC0|WBPZ_PSEAE D-rhamnosyltransferase WbpZ OS=Pseudomonas aeruginosa (strain ATCC 15692 / DSM 22644 / CIP 104116 / JCM 14847 / LMG 12228 / 1C / PRS 101 / PAO1) OX=208964 GN=wbpZ PE=1 SV=1 && PF13439:Glycosyltransferase Family 4|PF00534:Glycosyl transferases group 1	Glycos_transf_1	NOT_CHANGE
PA5446	4960.35	7722.55	6322.5	3278.38	6191.44	4228.95	6335.13	4566.26	0.472354	0.105209	0.2876	PA5446	NC_002516.2	6135709	6135912	+	204	protein_coding	hypothetical protein&&-- && PF06568:Domain of unknown function (DUF1127)	-	NOT_CHANGE
PA5445	519.496	629.694	709.974	745.388	590.342	520.212	619.721	618.647	0.00199838	0.992901	0.99639	PA5445	NC_002516.2	6133838	6135331	+	1494	protein_coding	coenzyme A transferase&&sp|P38946|CAT1_CLOK5 Succinyl-CoA:coenzyme A transferase OS=Clostridium kluyveri (strain ATCC 8527 / DSM 555 / NCIMB 10680) OX=431943 GN=cat1 PE=2 SV=1 && PF02550:Acetyl-CoA hydrolase/transferase N-terminal domain|PF13336:Acetyl-CoA hydrolase/transferase C-terminal domain	-	NOT_CHANGE
PA5444	142.935	108.534	135.578	110.006	130.657	105.093	129.016	115.252	0.161493	0.48355	0.694931	PA5444	NC_002516.2	6133312	6133740	+	429	protein_coding	hypothetical protein&&sp|P29939|YCB6_SINSX Uncharacterized transporter in cobO 3'region OS=Sinorhizobium sp. OX=42445 PE=3 SV=1 && PF00892:EamA-like transporter family	DUF6	NOT_CHANGE
PA5443	3503.39	3101.54	2965.13	2002.87	2750.48	2801.79	3190.02	2518.38	0.341163	0.0906969	0.264418	uvrD	NC_002516.2	6131088	6133274	+	2187	protein_coding	DNA-dependent helicase II&&sp|P03018|UVRD_ECOLI DNA helicase II OS=Escherichia coli (strain K12) OX=83333 GN=uvrD PE=1 SV=1 && PF00580:UvrD/REP helicase N-terminal domain|PF13361:UvrD-like helicase C-terminal domain	UvrD-helicase	NOT_CHANGE
PA5442	297.7	389.159	431.573	401.144	435.842	258.529	372.811	365.172	0.0289631	0.914635	0.958633	PA5442	NC_002516.2	6128056	6130911	-	2856	protein_coding	hypothetical protein&&sp|Q9HYT3|Y3311_PSEAE Uncharacterized signaling protein PA3311 OS=Pseudomonas aeruginosa (strain ATCC 15692 / DSM 22644 / CIP 104116 / JCM 14847 / LMG 12228 / 1C / PRS 101 / PAO1) OX=208964 GN=PA3311 PE=3 SV=1 && PF13426:PAS domain|PF00990:Diguanylate cyclase, GGDEF domain|PF00563:EAL domain|PF08447:PAS fold	EAL	NOT_CHANGE
PA5441	3308.21	3087.85	2848.18	2546.27	3293.14	3380.85	3081.41	3073.42	0.00383787	0.983489	0.9926	PA5441	NC_002516.2	6125796	6127997	-	2202	protein_coding	hypothetical protein&&-- && -	-	NOT_CHANGE
PA5440a	250.383	190.668	205.955	237.083	318.537	179.709	215.669	245.11	-0.185521	0.491959	0.701309	PA5440a	NC_002516.2	6120850	6121065	-	216	protein_coding	hypothetical protein&&-- && -	-	NOT_CHANGE
PA5440	1780.28	1332.72	1435.47	593.655	1161.61	1302.11	1516.16	1019.12	0.573294	0.0668364	0.217036	PA5440	NC_002516.2	6123686	6125080	+	1395	protein_coding	peptidase&&sp|P76403|TRHP_ECOLI tRNA hydroxylation protein P OS=Escherichia coli (strain K12) OX=83333 GN=trhP PE=1 SV=1 && PF01136:Peptidase family U32|PF16325:Peptidase family U32 C-terminal domain	-	NOT_CHANGE
PA5439	697.919	806.673	798.98	829.79	913.648	933.228	767.857	892.222	-0.216475	0.174553	0.389031	PA5439	NC_002516.2	6122139	6123605	+	1467	protein_coding	glucose-6-phosphate 1-dehydrogenase&&sp|Q9Z3S2|G6PD_RHIME Glucose-6-phosphate 1-dehydrogenase OS=Rhizobium meliloti (strain 1021) OX=266834 GN=zwf PE=3 SV=2 && PF02781:Glucose-6-phosphate dehydrogenase, C-terminal domain|PF00479:Glucose-6-phosphate dehydrogenase, NAD binding domain	G6PD_C	NOT_CHANGE
PA5438	1739.87	1901.79	1792.53	1257.49	1513.53	1802.35	1811.4	1524.45	0.249036	0.197777	0.420489	PA5438	NC_002516.2	6121172	6122053	-	882	protein_coding	transcriptional regulator&&sp|O68281|HEXR_PSEAE HTH-type transcriptional regulator HexR OS=Pseudomonas aeruginosa (strain ATCC 15692 / DSM 22644 / CIP 104116 / JCM 14847 / LMG 12228 / 1C / PRS 101 / PAO1) OX=208964 GN=hexR PE=3 SV=2 && PF01380:SIS domain|PF01418:Helix-turn-helix domain, rpiR family	HTH_6	NOT_CHANGE
PA5437	787.623	617.96	639.598	568.999	752.472	575.911	681.727	632.461	0.108073	0.604469	0.781891	PA5437	NC_002516.2	6119961	6120896	+	936	protein_coding	transcriptional regulator&&sp|Q9F1R2|CMPR_SYNE7 HTH-type transcriptional activator CmpR OS=Synechococcus elongatus (strain PCC 7942 / FACHB-805) OX=1140 GN=cmpR PE=1 SV=1 && PF00126:Bacterial regulatory helix-turn-helix protein, lysR family|PF03466:LysR substrate binding domain	LysR_substrate	NOT_CHANGE
PA5436	12392	13210.9	11213.7	13533.6	21646.2	14305.3	12272.2	16495	-0.426646	0.0693882	0.221755	PA5436	NC_002516.2	6118332	6119747	-	1416	protein_coding	acetyl-CoA carboxylase subunit alpha&&sp|D3DJ42|2OCS_HYDTT 2-oxoglutarate carboxylase small subunit OS=Hydrogenobacter thermophilus (strain DSM 6534 / IAM 12695 / TK-6) OX=608538 GN=cfiB PE=1 SV=1 && PF02785:Biotin carboxylase C-terminal domain|PF00289:Biotin carboxylase, N-terminal domain|PF02786:Carbamoyl-phosphate synthase L chain, ATP binding domain	CPSase_L_D2	NOT_CHANGE
PA5435	19467.8	16022	13528.8	23473.1	30067.4	23453.7	16339.5	25664.7	-0.651416	0.00240969	0.0247653	PA5435	NC_002516.2	6116493	6118316	-	1824	protein_coding	pyruvate carboxylase subunit B&&sp|Q8XGX8|DCOA_SALTI Oxaloacetate decarboxylase alpha chain OS=Salmonella typhi OX=90370 GN=oadA1 PE=3 SV=3 && PF02436:Conserved carboxylase domain|PF00364:Biotin-requiring enzyme|PF00682:HMGL-like	HMGL-like	NOT_CHANGE
PA5434	417.963	266.935	249.422	227.599	275.62	282.701	311.44	261.974	0.250107	0.342692	0.574658	mtr	NC_002516.2	6115059	6116312	-	1254	protein_coding	tryptophan permease&&sp|Q02DS7|MTR_PSEAB Tryptophan-specific transport protein OS=Pseudomonas aeruginosa (strain UCBPP-PA14) OX=208963 GN=mtr PE=1 SV=1 && PF03222:Tryptophan/tyrosine permease family	-	NOT_CHANGE
PA5433	128.149	112.445	114.879	160.268	131.611	152.385	118.491	148.088	-0.321294	0.125504	0.31865	PA5433	NC_002516.2	6114360	6115034	+	675	protein_coding	hypothetical protein&&sp|P40586|YIW2_YEAST Uncharacterized protein YIR042C OS=Saccharomyces cerevisiae (strain ATCC 204508 / S288c) OX=559292 GN=YIR042C PE=4 SV=1 && PF13302:Acetyltransferase (GNAT) domain	-	NOT_CHANGE
PA5432	65.0602	85.0673	74.5163	93.8848	64.8518	79.8709	74.8813	79.5358	-0.0869031	0.743759	0.870449	PA5432	NC_002516.2	6113902	6114351	+	450	protein_coding	acetyltransferase&&-- && PF00583:Acetyltransferase (GNAT) family	Acetyltransf_1	NOT_CHANGE
PA5431	159.693	137.868	123.159	192.511	175.481	161.844	140.24	176.612	-0.332823	0.115295	0.303682	PA5431	NC_002516.2	6112299	6113774	-	1476	protein_coding	transcriptional regulator&&sp|P49309|MOCR_RHIML Probable rhizopine catabolism regulatory protein MocR OS=Rhizobium meliloti OX=382 GN=mocR PE=3 SV=1 && PF00155:Aminotransferase class I and II|PF00392:Bacterial regulatory proteins, gntR family	GntR	NOT_CHANGE
PA5430	384.447	372.536	372.581	270.274	455.87	378.336	376.521	368.16	0.0325437	0.89121	0.947547	PA5430	NC_002516.2	6111048	6112262	-	1215	protein_coding	hypothetical protein&&sp|P31064|YEDE_ECOLI UPF0394 inner membrane protein YedE OS=Escherichia coli (strain K12) OX=83333 GN=yedE PE=1 SV=1 && PF04143:Sulphur transport	-	NOT_CHANGE
PA5429	4149.07	3964.92	3856.22	402.092	707.648	1606.88	3990.07	905.539	2.13987	7.18e-07	3.4e-05	aspA	NC_002516.2	6109260	6110684	+	1425	protein_coding	aspartate ammonia-lyase&&sp|Q9HTD7|ASPA_PSEAE Aspartate ammonia-lyase OS=Pseudomonas aeruginosa (strain ATCC 15692 / DSM 22644 / CIP 104116 / JCM 14847 / LMG 12228 / 1C / PRS 101 / PAO1) OX=208964 GN=aspA PE=3 SV=1 && PF10415:Fumarase C C-terminus|PF00206:Lyase	-	UP
PA5428	1267.69	894.674	885.915	819.358	812.555	918.515	1016.09	850.143	0.257472	0.224807	0.453192	PA5428	NC_002516.2	6108176	6109084	-	909	protein_coding	transcriptional regulator&&sp|P39376|YJIE_ECOLI HTH-type transcriptional regulator YjiE OS=Escherichia coli (strain K12) OX=83333 GN=yjiE PE=1 SV=1 && PF03466:LysR substrate binding domain|PF00126:Bacterial regulatory helix-turn-helix protein, lysR family	LysR_substrate	NOT_CHANGE
PA5427	32346.8	24511.1	22755.4	28274.5	26641.7	37491	26537.8	30802.4	-0.214984	0.349621	0.579369	adhA	NC_002516.2	6107111	6108139	+	1029	protein_coding	alcohol dehydrogenase&&sp|Q8GIX7|ADH_MORSE Alcohol dehydrogenase OS=Moraxella sp. (strain TAE123) OX=191545 GN=adh PE=1 SV=1 && PF00107:Zinc-binding dehydrogenase|PF08240:Alcohol dehydrogenase GroES-like domain	ADH_N	NOT_CHANGE
PA5426	646.659	509.426	522.649	184.925	334.75	417.22	559.578	312.298	0.842202	0.00697039	0.052399	purE	NC_002516.2	6106272	6106763	-	492	protein_coding	5-(carboxyamino)imidazole ribonucleotide mutase&&sp|P72157|PURE_PSEAE N5-carboxyaminoimidazole ribonucleotide mutase OS=Pseudomonas aeruginosa (strain ATCC 15692 / DSM 22644 / CIP 104116 / JCM 14847 / LMG 12228 / 1C / PRS 101 / PAO1) OX=208964 GN=purE PE=3 SV=2 && PF00731:AIR carboxylase	-	NOT_CHANGE
PA5425	1225.3	1075.56	1048.4	311.053	657.102	837.593	1116.42	601.916	0.891643	0.00943814	0.0637045	purK	NC_002516.2	6105159	6106241	-	1083	protein_coding	5-(carboxyamino)imidazole ribonucleotide synthase&&sp|P72158|PURK_PSEAE N5-carboxyaminoimidazole ribonucleotide synthase OS=Pseudomonas aeruginosa (strain ATCC 15692 / DSM 22644 / CIP 104116 / JCM 14847 / LMG 12228 / 1C / PRS 101 / PAO1) OX=208964 GN=purK PE=3 SV=2 && PF17769:Phosphoribosylaminoimidazole carboxylase C-terminal domain|PF02222:ATP-grasp domain	-	NOT_CHANGE
PA5424	259.255	312.891	358.092	673.315	452.055	287.956	310.08	471.109	-0.60411	0.0640721	0.212053	PA5424	NC_002516.2	6104799	6105044	-	246	protein_coding	hypothetical protein&&-- && PF04226:Transglycosylase associated protein	-	NOT_CHANGE
PA5423	561.884	518.226	567.152	550.032	518.815	469.767	549.087	512.871	0.0979198	0.54509	0.739289	PA5423	NC_002516.2	6104189	6104737	-	549	protein_coding	hypothetical protein&&-- && PF11736:Protein of unknown function (DUF3299)	-	NOT_CHANGE
PA5422	1315.99	1550.77	1523.44	1468.96	1190.22	1365.16	1463.4	1341.45	0.125529	0.465677	0.679829	PA5422	NC_002516.2	6103167	6104123	+	957	protein_coding	hypothetical protein&&sp|Q8ZPV9|YEAD_SALTY Putative glucose-6-phosphate 1-epimerase OS=Salmonella typhimurium (strain LT2 / SGSC1412 / ATCC 700720) OX=99287 GN=yeaD PE=1 SV=1 && PF01263:Aldose 1-epimerase	Aldose_epim	NOT_CHANGE
PA5421	516.539	684.45	630.283	864.878	651.379	581.166	610.424	699.141	-0.196106	0.392671	0.617637	fdhA	NC_002516.2	6101884	6103083	+	1200	protein_coding	glutathione-independent formaldehyde dehydrogenase&&sp|Q9HTE3|FADH_PSEAE Glutathione-independent formaldehyde dehydrogenase OS=Pseudomonas aeruginosa (strain ATCC 15692 / DSM 22644 / CIP 104116 / JCM 14847 / LMG 12228 / 1C / PRS 101 / PAO1) OX=208964 GN=fdhA PE=3 SV=1 && PF08240:Alcohol dehydrogenase GroES-like domain	ADH_N	NOT_CHANGE
PA5420	237.568	285.513	298.065	304.414	304.231	183.913	273.716	264.186	0.0498535	0.848316	0.926167	purU2	NC_002516.2	6100820	6101677	+	858	protein_coding	formyltetrahydrofolate deformylase&&sp|Q46339|PURU_CORS1 Formyltetrahydrofolate deformylase OS=Corynebacterium sp. (strain P-1) OX=69006 GN=purU PE=3 SV=1 && PF00551:Formyl transferase	-	NOT_CHANGE
PA5419	175.465	213.157	188.361	235.186	207.907	134.519	192.328	192.538	-0.00299147	0.990955	0.995708	soxG	NC_002516.2	6100135	6100770	+	636	protein_coding	sarcosine oxidase subunit gamma&&-- && PF04268:Sarcosine oxidase, gamma subunit family	-	NOT_CHANGE
PA5418	1230.23	1223.21	1180.88	1607.42	1505.9	916.413	1211.44	1343.24	-0.149245	0.548958	0.741718	soxA	NC_002516.2	6097024	6100041	+	3018	protein_coding	sarcosine oxidase subunit alpha&&sp|Q46337|SOXA_CORS1 Sarcosine oxidase subunit alpha OS=Corynebacterium sp. (strain P-1) OX=69006 GN=soxA PE=1 SV=1 && PF07992:Pyridine nucleotide-disulphide oxidoreductase|PF01571:Aminomethyltransferase folate-binding domain|PF08669:Glycine cleavage T-protein C-terminal barrel domain|PF13510:2Fe-2S iron-sulfur cluster binding domain|PF17806:Sarcosine oxidase A3 d…	GCV_T	NOT_CHANGE
PA5417	63.0887	107.556	121.089	230.444	168.806	112.45	97.2447	170.567	-0.812359	0.021771	0.110123	soxD	NC_002516.2	6096707	6097027	+	321	protein_coding	sarcosine oxidase subunit delta&&-- && PF04267:Sarcosine oxidase, delta subunit family	-	NOT_CHANGE
PA5416	427.82	548.538	496.775	697.023	835.444	448.748	491.044	660.405	-0.427929	0.113196	0.299456	soxB	NC_002516.2	6095363	6096613	+	1251	protein_coding	sarcosine oxidase subunit beta&&sp|P40875|SOXB_CORS1 Sarcosine oxidase subunit beta OS=Corynebacterium sp. (strain P-1) OX=69006 GN=soxB PE=1 SV=2 && PF01266:FAD dependent oxidoreductase	DAO	NOT_CHANGE
PA5415	47.3165	35.2003	50.7125	97.6781	87.7407	37.8336	44.4098	74.4175	-0.748517	0.0578015	0.200026	glyA1	NC_002516.2	6094024	6095277	+	1254	protein_coding	serine hydroxymethyltransferase&&sp|Q9HTE9|GLYA1_PSEAE Serine hydroxymethyltransferase 1 OS=Pseudomonas aeruginosa (strain ATCC 15692 / DSM 22644 / CIP 104116 / JCM 14847 / LMG 12228 / 1C / PRS 101 / PAO1) OX=208964 GN=glyA1 PE=3 SV=1 && PF00464:Serine hydroxymethyltransferase	SHMT	NOT_CHANGE
PA5414	647.645	572.982	598.2	500.719	475.898	548.587	606.276	508.401	0.2544	0.116022	0.304176	PA5414	NC_002516.2	6093167	6093808	-	642	protein_coding	hypothetical protein&&-- && -	-	NOT_CHANGE
PA5413	2302.74	2375.04	2456.97	1292.58	1503.04	1810.76	2378.25	1535.46	0.631446	0.000710107	0.0100728	ltaA	NC_002516.2	6092046	6093086	-	1041	protein_coding	low specificity l-threonine aldolase&&sp|Q9HTF1|LTAE_PSEAE Low specificity L-threonine aldolase OS=Pseudomonas aeruginosa (strain ATCC 15692 / DSM 22644 / CIP 104116 / JCM 14847 / LMG 12228 / 1C / PRS 101 / PAO1) OX=208964 GN=ltaE PE=3 SV=1 && PF01212:Beta-eliminating lyase	Beta_elim_lyase	NOT_CHANGE
PA5412	1201.64	1113.7	1097.04	1255.59	1486.82	1191.76	1137.46	1311.39	-0.205404	0.219556	0.44674	PA5412	NC_002516.2	6088193	6090706	-	2514	protein_coding	hypothetical protein&&-- && -	-	NOT_CHANGE
PA5411	210.953	307.025	250.457	440.974	543.611	263.784	256.145	416.123	-0.700592	0.0227241	0.112685	gbcB	NC_002516.2	6087099	6088199	+	1101	protein_coding	protein GbcB&&sp|Q8ETH0|HMP_OCEIH Flavohemoprotein OS=Oceanobacillus iheyensis (strain DSM 14371 / CIP 107618 / JCM 11309 / KCTC 3954 / HTE831) OX=221109 GN=hmp PE=3 SV=1 && PF00111:2Fe-2S iron-sulfur cluster binding domain|PF00970:Oxidoreductase FAD-binding domain|PF00175:Oxidoreductase NAD-binding domain	FAD_binding_6	NOT_CHANGE
PA5410	1311.06	1409.97	1623.83	2536.79	2577.86	1419.81	1448.29	2178.15	-0.588941	0.0298174	0.134006	gbcA	NC_002516.2	6085385	6086674	-	1290	protein_coding	protein GbcA&&sp|D0C9N6|CNTA_ACIB2 Carnitine monooxygenase oxygenase subunit OS=Acinetobacter baumannii (strain ATCC 19606 / DSM 30007 / CIP 70.34 / JCM 6841 / NBRC 109757 / NCIMB 12457 / NCTC 12156 / 81) OX=575584 GN=cntA PE=1 SV=1 && PF00355:Rieske [2Fe-2S] domain|PF00848:Ring hydroxylating alpha subunit (catalytic domain)	-	NOT_CHANGE
PA5409	1179.96	1584.99	1583.47	1598.89	1440.09	1500.73	1449.47	1513.24	-0.0621728	0.74214	0.870199	PA5409	NC_002516.2	6084550	6085110	-	561	protein_coding	hypothetical protein&&-- && PF03729:Short repeat of unknown function (DUF308)	-	NOT_CHANGE
PA5408	366.703	395.025	499.88	427.697	385.296	390.947	420.536	401.313	0.0669788	0.73397	0.867109	PA5408	NC_002516.2	6084369	6084545	-	177	protein_coding	hypothetical protein&&-- && -	-	NOT_CHANGE
PA5407	109.419	140.801	171.801	119.49	98.2315	119.806	140.674	112.509	0.322036	0.204666	0.429602	PA5407	NC_002516.2	6084082	6084372	+	291	protein_coding	hypothetical protein&&-- && PF05164:Cell division protein ZapA	-	NOT_CHANGE
PA5406	58.1599	108.534	109.704	36.0366	68.6666	79.8709	92.1329	61.5247	0.584382	0.128641	0.323055	PA5406	NC_002516.2	6083753	6084085	+	333	protein_coding	hypothetical protein&&-- && -	-	NOT_CHANGE
PA5405	14.7864	22.4891	14.4893	19.915	18.1204	28.3752	17.2549	22.1368	-0.352463	0.406389	0.630674	PA5405	NC_002516.2	6083523	6083756	+	234	protein_coding	hypothetical protein&&-- && -	-	NOT_CHANGE
PA5404	30.5586	12.7112	22.7689	12.3283	22.8889	12.6112	22.0129	15.9428	0.461639	0.34568	0.578112	PA5404	NC_002516.2	6083105	6083509	+	405	protein_coding	hypothetical protein&&-- && -	-	NOT_CHANGE
PA5403	110.405	128.09	109.704	123.283	125.889	102.991	116.067	117.388	-0.0173456	0.936889	0.968539	PA5403	NC_002516.2	6082867	6083073	+	207	protein_coding	transcriptional regulator&&sp|O31834|YOZG_BACSU Uncharacterized HTH-type transcriptional regulator YozG OS=Bacillus subtilis (strain 168) OX=224308 GN=yozG PE=4 SV=1 && PF13443:Cro/C1-type HTH DNA-binding domain	-	NOT_CHANGE
PA5402	61.1172	55.7338	75.5512	51.2099	63.8981	45.1901	64.1341	53.4327	0.259886	0.361013	0.589121	PA5402	NC_002516.2	6082290	6082859	+	570	protein_coding	hypothetical protein&&-- && -	-	NOT_CHANGE
PA5401	69.0033	81.1562	92.1104	91.9881	66.7592	60.9541	80.7566	73.2338	0.138259	0.617338	0.790504	PA5401	NC_002516.2	6081392	6082165	+	774	protein_coding	hypothetical protein&&-- && PF01012:Electron transfer flavoprotein domain	-	NOT_CHANGE
PA5400	127.163	83.1118	105.565	133.715	118.259	77.769	105.28	109.914	-0.064316	0.828413	0.917333	PA5400	NC_002516.2	6080124	6081356	+	1233	protein_coding	electron transfer flavoprotein subunit alpha&&sp|P53578|FIXB_CLOSA Protein FixB OS=Clostridium saccharobutylicum OX=169679 GN=fixB PE=3 SV=1 && PF00766:Electron transfer flavoprotein FAD-binding domain|PF01012:Electron transfer flavoprotein domain	-	NOT_CHANGE
PA5399	276.013	290.402	279.436	375.539	326.167	205.983	281.95	302.563	-0.102819	0.693181	0.838126	dgcB	NC_002516.2	6078044	6080005	+	1962	protein_coding	dimethylglycine catabolism protein DgcB&&sp|P45866|FADF_BACSU Probable iron-sulfur-binding oxidoreductase FadF OS=Bacillus subtilis (strain 168) OX=224308 GN=fadF PE=2 SV=1 && PF11982:Domain of unknown function (DUF3483)|PF02754:Cysteine-rich domain|PF13183:4Fe-4S dicluster domain	-	NOT_CHANGE
PA5398	926.615	1091.21	1028.74	1562.85	1613.67	905.904	1015.52	1360.81	-0.422482	0.10641	0.289371	dgcA	NC_002516.2	6075880	6077940	+	2061	protein_coding	dimethylglycine catabolism protein DgcA&&sp|O87278|STCD_RHIME Probable N-methylproline demethylase OS=Rhizobium meliloti (strain 1021) OX=266834 GN=stcD PE=2 SV=2 && PF00724:NADH:flavin oxidoreductase / NADH oxidase family|PF07992:Pyridine nucleotide-disulphide oxidoreductase	Oxidored_FMN	NOT_CHANGE
PA5397	252.355	279.647	259.772	469.424	408.185	221.747	263.924	366.452	-0.474287	0.111593	0.296673	PA5397	NC_002516.2	6075334	6075864	+	531	protein_coding	hypothetical protein&&-- && -	-	NOT_CHANGE
PA5396	488.937	748.984	733.778	1064.98	1266.52	616.898	657.233	982.797	-0.580789	0.0643367	0.212389	PA5396	NC_002516.2	6074230	6075207	+	978	protein_coding	hypothetical protein&&sp|C5PCN6|DPEP2_COCP7 Putative dipeptidase CPC735_014430 OS=Coccidioides posadasii (strain C735) OX=222929 GN=CPC735_014430 PE=3 SV=1 && PF01244:Membrane dipeptidase (Peptidase family M19)	-	NOT_CHANGE
PA5395	57.1741	58.6671	50.7125	82.5048	63.8981	66.2088	55.5179	70.8706	-0.352479	0.179069	0.394895	PA5395	NC_002516.2	6073538	6074008	+	471	protein_coding	hypothetical protein&&-- && PF07080:Protein of unknown function (DUF1348)	-	NOT_CHANGE
PA5394	389.376	352.981	347.743	523.479	447.287	345.757	363.366	438.841	-0.272905	0.20813	0.434012	cls	NC_002516.2	6071912	6073384	-	1473	protein_coding	cardiolipin synthetase&&sp|B7V5T6|CLSA_PSEA8 Cardiolipin synthase A OS=Pseudomonas aeruginosa (strain LESB58) OX=557722 GN=clsA PE=3 SV=1 && PF13091:PLD-like domain	-	NOT_CHANGE
PA5393	87.7327	83.1118	91.0754	94.8331	109.676	107.195	87.3066	103.901	-0.250954	0.255104	0.486198	PA5393	NC_002516.2	6070266	6071618	-	1353	protein_coding	hypothetical protein&&sp|A7Z1S7|CZCO_BACVZ Uncharacterized oxidoreductase CzcO OS=Bacillus velezensis (strain DSM 23117 / BGSC 10A6 / FZB42) OX=326423 GN=czcO PE=3 SV=1 && PF13738:Pyridine nucleotide-disulphide oxidoreductase	-	NOT_CHANGE
PA5392	35.4874	37.1558	16.5592	31.2949	20.0278	27.3243	29.7341	26.2156	0.185208	0.657465	0.817441	PA5392	NC_002516.2	6069844	6070266	-	423	protein_coding	hypothetical protein&&sp|Q8U308|RIDA_PYRFU 2-iminobutanoate/2-iminopropanoate deaminase OS=Pyrococcus furiosus (strain ATCC 43587 / DSM 3638 / JCM 8422 / Vc1) OX=186497 GN=yjgF PE=1 SV=1 && PF01042:Endoribonuclease L-PSP	Ribonuc_L-PSP	NOT_CHANGE
PA5391	26.6155	15.6446	17.5941	22.7599	19.0741	11.5603	19.9514	17.7981	0.159073	0.72337	0.860673	PA5391	NC_002516.2	6069156	6069830	-	675	protein_coding	hypothetical protein&&-- && PF06267:Family of unknown function (DUF1028)	-	NOT_CHANGE
PA5390	168.565	96.8008	127.299	168.803	116.352	114.552	130.888	133.235	-0.0265473	0.928502	0.965008	PA5390	NC_002516.2	6067945	6069099	-	1155	protein_coding	acetylornithine deacetylase&&sp|Q9CLT9|ARGE_PASMU Acetylornithine deacetylase OS=Pasteurella multocida (strain Pm70) OX=272843 GN=argE PE=3 SV=2 && PF01546:Peptidase family M20/M25/M40|PF07687:Peptidase dimerisation domain	Peptidase_M20	NOT_CHANGE
PA5389	115.334	125.157	185.256	217.168	186.926	180.76	141.915	194.951	-0.459627	0.071133	0.224846	cdhR	NC_002516.2	6067005	6068015	+	1011	protein_coding	CdhR family transcriptional regulator&&sp|Q9HTH5|CDHR_PSEAE HTH-type transcriptional regulator CdhR OS=Pseudomonas aeruginosa (strain ATCC 15692 / DSM 22644 / CIP 104116 / JCM 14847 / LMG 12228 / 1C / PRS 101 / PAO1) OX=208964 GN=cdhR PE=1 SV=1 && PF12833:Helix-turn-helix domain|PF01965:DJ-1/PfpI family	DJ-1_PfpI	NOT_CHANGE
PA5388	15.7722	11.7334	27.9436	40.7782	33.3796	35.7317	18.4831	36.6299	-0.992708	0.0144008	0.0850773	PA5388	NC_002516.2	6065856	6066794	-	939	protein_coding	hypothetical protein&&sp|Q9RR44|GBUC_LISM4 Glycine betaine/carnitine transport binding protein GbuC OS=Listeria monocytogenes serotype 1/2a (strain 10403S) OX=393133 GN=gbuC PE=1 SV=2 && PF04069:Substrate binding domain of ABC-type glycine betaine transport system	-	NOT_CHANGE
PA5387	14.7864	14.6668	14.4893	15.1733	20.0278	18.9168	14.6475	18.0393	-0.299172	0.482853	0.694661	cdhC	NC_002516.2	6064899	6065783	-	885	protein_coding	carnitine dehydrogenase&&sp|Q8RHX2|KCE_FUSNN 3-keto-5-aminohexanoate cleavage enzyme OS=Fusobacterium nucleatum subsp. nucleatum (strain ATCC 25586 / DSM 15643 / BCRC 10681 / CIP 101130 / JCM 8532 / KCTC 2640 / LMG 13131 / VPI 4355) OX=190304 GN=kce PE=1 SV=1 && PF05853:beta-keto acid cleavage enzyme	-	NOT_CHANGE
PA5386	12.8149	10.7556	11.3844	15.1733	13.3518	11.5603	11.6517	13.3618	-0.200542	0.675102	1	cdhA	NC_002516.2	6063883	6064848	-	966	protein_coding	3-hydroxybutyryl-CoA dehydrogenase&&sp|Q9HTH8|LCDH_PSEAE L-carnitine dehydrogenase OS=Pseudomonas aeruginosa (strain ATCC 15692 / DSM 22644 / CIP 104116 / JCM 14847 / LMG 12228 / 1C / PRS 101 / PAO1) OX=208964 GN=lcdH PE=1 SV=1 && PF02737:3-hydroxyacyl-CoA dehydrogenase, NAD binding domain|PF00725:3-hydroxyacyl-CoA dehydrogenase, C-terminal domain	3HCDH_N	NOT_CHANGE
PA5385	11.8291	3.91114	3.10484	1.89666	6.67592	5.25466	6.28171	4.60908	0.453486	0.585876	1	cdhB	NC_002516.2	6063353	6063832	-	480	protein_coding	carnitine dehydrogenase&&-- && PF13279:Thioesterase-like superfamily	-	NOT_CHANGE
PA5384	4.92881	5.86671	10.3495	6.63832	4.76852	3.1528	7.04833	4.85321	0.524613	0.461705	1	PA5384	NC_002516.2	6062352	6063347	-	996	protein_coding	lipolytic protein&&sp|P71668|LIPI_MYCTU Esterase LipI OS=Mycobacterium tuberculosis (strain ATCC 25618 / H37Rv) OX=83332 GN=lipI PE=1 SV=1 && PF07859:alpha/beta hydrolase fold	Abhydrolase_3	NOT_CHANGE
PA5383	8.87185	8.80007	15.5242	18.0183	14.3056	23.1205	11.0654	18.4815	-0.740769	0.126722	0.320304	PA5383	NC_002516.2	6061341	6062408	+	1068	protein_coding	hypothetical protein&&sp|Q9HTI1|Y5383_PSEAE UPF0324 membrane protein PA5383 OS=Pseudomonas aeruginosa (strain ATCC 15692 / DSM 22644 / CIP 104116 / JCM 14847 / LMG 12228 / 1C / PRS 101 / PAO1) OX=208964 GN=PA5383 PE=3 SV=1 && PF03601:Conserved hypothetical protein 698	-	NOT_CHANGE
PA5382	145.893	189.69	180.081	184.925	199.324	169.2	171.888	184.483	-0.102824	0.62182	0.794523	PA5382	NC_002516.2	6060340	6061233	-	894	protein_coding	transcriptional regulator&&sp|P0ACR6|YEIE_ECO57 Uncharacterized HTH-type transcriptional regulator YeiE OS=Escherichia coli O157:H7 OX=83334 GN=yeiE PE=3 SV=1 && PF00126:Bacterial regulatory helix-turn-helix protein, lysR family|PF03466:LysR substrate binding domain	LysR_substrate	NOT_CHANGE
PA5381	201.095	215.113	261.842	278.809	298.509	207.034	226.017	261.451	-0.21154	0.361022	0.589121	PA5381	NC_002516.2	6059823	6060200	-	378	protein_coding	hypothetical protein&&-- && -	-	NOT_CHANGE
PA5380	837.897	1026.67	1099.11	1277.4	1238.86	1122.4	987.895	1212.89	-0.29625	0.100704	0.281444	gbdR	NC_002516.2	6058673	6059776	+	1104	protein_coding	protein GbdR&&sp|Q9HTH5|CDHR_PSEAE HTH-type transcriptional regulator CdhR OS=Pseudomonas aeruginosa (strain ATCC 15692 / DSM 22644 / CIP 104116 / JCM 14847 / LMG 12228 / 1C / PRS 101 / PAO1) OX=208964 GN=cdhR PE=1 SV=1 && PF12833:Helix-turn-helix domain|PF01965:DJ-1/PfpI family	DJ-1_PfpI	NOT_CHANGE
PA5379	100.548	125.157	119.019	167.855	164.991	102.991	114.908	145.279	-0.340305	0.205712	0.431299	sdaB	NC_002516.2	6056877	6058253	+	1377	protein_coding	L-serine dehydratase&&sp|O86564|SDHL_STRCO L-serine dehydratase OS=Streptomyces coelicolor (strain ATCC BAA-471 / A3(2) / M145) OX=100226 GN=sdaA PE=3 SV=1 && PF03315:Serine dehydratase beta chain|PF03313:Serine dehydratase alpha chain	-	NOT_CHANGE
PA5378	1467.8	1699.39	1578.3	2826.03	2428.13	1813.91	1581.83	2356.02	-0.574895	0.00813811	0.0581736	PA5378	NC_002516.2	6055475	6056413	-	939	protein_coding	hypothetical protein&&sp|Q9L4K3|ORF1_CHRSD Uncharacterized protein ORF1 (Fragment) OS=Chromohalobacter salexigens (strain ATCC BAA-138 / DSM 3043 / CIP 106854 / NCIMB 13768 / 1H11) OX=290398 PE=3 SV=1 && PF04069:Substrate binding domain of ABC-type glycine betaine transport system	-	NOT_CHANGE
PA5377	720.591	732.361	637.528	935.054	897.435	782.945	696.827	871.811	-0.323344	0.053031	0.188305	PA5377	NC_002516.2	6054594	6055433	-	840	protein_coding	ABC transporter permease&&sp|P14176|PROW_ECOLI Glycine betaine/proline betaine transport system permease protein ProW OS=Escherichia coli (strain K12) OX=83333 GN=proW PE=1 SV=1 && PF00528:Binding-protein-dependent transport system inner membrane component	BPD_transp_1	NOT_CHANGE
PA5376	1247.97	1228.1	1134.3	1687.08	1457.26	1179.15	1203.46	1441.16	-0.26023	0.181472	0.397938	PA5376	NC_002516.2	6053412	6054590	-	1179	protein_coding	ABC transporter ATP-binding protein&&sp|P14175|PROV_ECOLI Glycine betaine/proline betaine transport system ATP-binding protein ProV OS=Escherichia coli (strain K12) OX=83333 GN=proV PE=1 SV=1 && PF00005:ABC transporter	ABC_tran	NOT_CHANGE
PA5375	387.404	546.582	770.001	805.133	781.083	518.11	567.996	701.442	-0.304928	0.32148	0.55397	betT1	NC_002516.2	6051644	6053194	+	1551	protein_coding	choline transporter BetT&&sp|Q6FDF6|BETT1_ACIAD Osmo-independent choline transporter BetT1 OS=Acinetobacter baylyi (strain ATCC 33305 / BD413 / ADP1) OX=62977 GN=betT1 PE=1 SV=1 && PF02028:BCCT, betaine/carnitine/choline family transporter	-	NOT_CHANGE
PA5374	2560.02	2325.17	2677.41	2685.67	2092.43	1681.49	2520.87	2153.2	0.227278	0.305843	0.539833	betI	NC_002516.2	6050718	6051311	-	594	protein_coding	BetI family transcriptional regulator&&sp|A6VEI5|BETI_PSEA7 HTH-type transcriptional regulator BetI OS=Pseudomonas aeruginosa (strain PA7) OX=381754 GN=betI PE=3 SV=1 && PF00440:Bacterial regulatory proteins, tetR family|PF13977:BetI-type transcriptional repressor, C-terminal	TetR_N	NOT_CHANGE
PA5373	6339.43	6759.43	7000.39	10241	6148.53	5348.2	6699.75	7245.92	-0.113098	0.679386	0.831226	betB	NC_002516.2	6049185	6050657	-	1473	protein_coding	betaine aldehyde dehydrogenase&&sp|B7V5R4|BETB_PSEA8 Betaine aldehyde dehydrogenase OS=Pseudomonas aeruginosa (strain LESB58) OX=557722 GN=betB PE=3 SV=1 && PF00171:Aldehyde dehydrogenase family	Aldedh	NOT_CHANGE
PA5372	1552.57	1573.26	1817.37	3171.22	1722.39	1427.17	1647.73	2106.92	-0.354788	0.258855	0.4906	betA	NC_002516.2	6047364	6049049	-	1686	protein_coding	choline dehydrogenase&&sp|B7V5R3|BETA_PSEA8 Oxygen-dependent choline dehydrogenase OS=Pseudomonas aeruginosa (strain LESB58) OX=557722 GN=betA PE=3 SV=1 && PF05199:GMC oxidoreductase|PF00732:GMC oxidoreductase	-	NOT_CHANGE
PA5371	1339.65	1388.46	1507.92	1508.79	1318.97	1322.07	1412.01	1383.28	0.0294892	0.848462	0.926167	PA5371	NC_002516.2	6046914	6047318	+	405	protein_coding	acyl-CoA thioesterase&&sp|P44886|Y827_HAEIN Uncharacterized acyl-CoA thioester hydrolase HI_0827 OS=Haemophilus influenzae (strain ATCC 51907 / DSM 11121 / KW20 / Rd) OX=71421 GN=HI_0827 PE=1 SV=1 && PF03061:Thioesterase superfamily	4HBT	NOT_CHANGE
PA5370	278.97	320.714	331.183	210.529	241.287	241.715	310.289	231.177	0.424826	0.0211632	0.107989	PA5370	NC_002516.2	6045310	6046626	-	1317	protein_coding	major facilitator superfamily transporter&&sp|Q5HRH0|PROP_STAEQ Putative proline/betaine transporter OS=Staphylococcus epidermidis (strain ATCC 35984 / RP62A) OX=176279 GN=proP PE=3 SV=1 && PF00083:Sugar (and other) transporter	Sugar_tr	NOT_CHANGE
PA5369_5	0	0.977785	34.1533	0.948331	0	0	11.7104	0.31611	5.05424	0.0976289	1	PA5369_5	NC_002516.2	6043208	6044743	-	1536	protein_coding	16S ribosomal RNA&&-- && -	-	NOT_CHANGE
PA5369_2	0	0.977785	66.2367	0.948331	0	2.10187	22.4048	1.01673	4.47037	0.0881954	1	PA5369_2	NC_002516.2	6039846	6042736	-	2891	protein_coding	23S ribosomal RNA&&sp|Q3BAI2|YCX91_PHAAO Uncharacterized protein ORF91 OS=Phalaenopsis aphrodite subsp. formosana OX=308872 PE=4 SV=1 && -	-	NOT_CHANGE
PA5369	930.558	1166.5	1033.91	24602.6	56499.3	9133.66	1043.66	30078.5	-4.84902	3.05e-21	1.38e-18	pstS	NC_002516.2	6038212	6039183	-	972	protein_coding	phosphate ABC transporter substrate-binding protein&&sp|Q02DZ3|PSTS_PSEAB Phosphate-binding protein PstS OS=Pseudomonas aeruginosa (strain UCBPP-PA14) OX=208963 GN=pstS PE=1 SV=1 && PF12849:PBP superfamily domain	-	DOWN
PA5368	372.618	321.691	317.729	1975.37	9472.18	2391.92	337.346	4613.16	-3.77346	3.71e-13	6.97e-11	pstC	NC_002516.2	6035756	6037789	-	2034	protein_coding	phosphate ABC transporter permease&&sp|Q9CNJ5|PSTC_PASMU Phosphate transport system permease protein PstC OS=Pasteurella multocida (strain Pm70) OX=272843 GN=pstC PE=3 SV=1 && PF00528:Binding-protein-dependent transport system inner membrane component	BPD_transp_1	DOWN
PA5367	314.458	551.471	481.251	4554.83	14229.3	2786.02	449.06	7190.04	-4.00105	1.5e-14	4.09e-12	pstA	NC_002516.2	6034060	6035736	-	1677	protein_coding	phosphate ABC transporter permease&&sp|P46339|YQGH_BACSU Probable ABC transporter permease protein YqgH OS=Bacillus subtilis (strain 168) OX=224308 GN=yqgH PE=3 SV=2 && PF00528:Binding-protein-dependent transport system inner membrane component	BPD_transp_1	DOWN
PA5366	568.784	990.497	705.835	8430.66	17263	3593.14	755.038	9762.26	-3.69259	1.94e-14	4.8e-12	pstB	NC_002516.2	6033211	6034044	-	834	protein_coding	phosphate ABC transporter ATP-binding protein&&sp|Q51546|PSTB_PSEAE Phosphate import ATP-binding protein PstB OS=Pseudomonas aeruginosa (strain ATCC 15692 / DSM 22644 / CIP 104116 / JCM 14847 / LMG 12228 / 1C / PRS 101 / PAO1) OX=208964 GN=pstB PE=3 SV=1 && PF00005:ABC transporter	ABC_tran	DOWN
PA5365	650.602	981.697	854.867	9061.3	12540.2	2996.21	829.055	8199.25	-3.30598	1.13e-13	2.27e-11	phoU	NC_002516.2	6032387	6033115	-	729	protein_coding	phosphate uptake regulatory protein PhoU&&sp|Q51547|PHOU_PSEAE Phosphate-specific transport system accessory protein PhoU homolog OS=Pseudomonas aeruginosa (strain ATCC 15692 / DSM 22644 / CIP 104116 / JCM 14847 / LMG 12228 / 1C / PRS 101 / PAO1) OX=208964 GN=phoU PE=1 SV=1 && PF01895:PhoU domain	PhoU	DOWN
PA5364	5371.41	5446.27	5279.27	4028.51	4712.25	4384.49	5365.65	4375.08	0.294452	0.0381827	0.156583	PA5364	NC_002516.2	6031366	6032268	-	903	protein_coding	two-component response regulator&&sp|Q51455|CHEY_PSEAE Chemotaxis protein CheY OS=Pseudomonas aeruginosa (strain ATCC 15692 / DSM 22644 / CIP 104116 / JCM 14847 / LMG 12228 / 1C / PRS 101 / PAO1) OX=208964 GN=cheY PE=3 SV=1 && PF00072:Response regulator receiver domain	Response_reg	NOT_CHANGE
PA5363	616.101	575.916	545.418	290.189	317.583	384.641	579.145	330.805	0.80895	1.76e-05	0.000505795	PA5363	NC_002516.2	6030351	6031250	-	900	protein_coding	hypothetical protein&&sp|P0AFT0|MEPM_ECOL6 Murein DD-endopeptidase MepM OS=Escherichia coli O6:H1 (strain CFT073 / ATCC 700928 / UPEC) OX=199310 GN=mepM PE=3 SV=1 && PF01551:Peptidase family M23|PF13511:Domain of unknown function (DUF4124)	Peptidase_M23	NOT_CHANGE
PA5362	1867.03	1418.77	1448.93	825.048	885.037	828.135	1578.24	846.073	0.89946	9.61e-07	4.44e-05	PA5362	NC_002516.2	6028976	6030316	+	1341	protein_coding	hypothetical protein&&sp|O07585|YHDP_BACSU UPF0053 protein YhdP OS=Bacillus subtilis (strain 168) OX=224308 GN=yhdP PE=3 SV=1 && PF01595:Cyclin M transmembrane N-terminal domain|PF03471:Transporter associated domain|PF00571:CBS domain	CBS	NOT_CHANGE
PA5361	183.352	176.001	169.731	375.539	1513.53	439.29	176.361	776.119	-2.13786	9.5e-06	0.000294059	phoR	NC_002516.2	6027542	6028873	+	1332	protein_coding	two-component sensor PhoR&&sp|P23621|PHOR_PSEAE Phosphate regulon sensor protein PhoR OS=Pseudomonas aeruginosa (strain ATCC 15692 / DSM 22644 / CIP 104116 / JCM 14847 / LMG 12228 / 1C / PRS 101 / PAO1) OX=208964 GN=phoR PE=3 SV=2 && PF11808:Phosphate regulon sensor protein PhoR|PF00512:His Kinase A (phospho-acceptor) domain|PF02518:Histidine kinase-, DNA gyrase B-, and HSP90-like ATPase	HATPase_c	DOWN
PA5360	527.382	600.36	534.033	1394.05	4636.91	1623.69	553.925	2551.55	-2.20364	2.61e-07	1.39e-05	phoB	NC_002516.2	6026779	6027468	+	690	protein_coding	two-component response regulator PhoB&&sp|P23620|PHOB_PSEAE Phosphate regulon transcriptional regulatory protein PhoB OS=Pseudomonas aeruginosa (strain ATCC 15692 / DSM 22644 / CIP 104116 / JCM 14847 / LMG 12228 / 1C / PRS 101 / PAO1) OX=208964 GN=phoB PE=3 SV=2 && PF00072:Response regulator receiver domain|PF00486:Transcriptional regulatory protein, C terminal	Response_reg	DOWN
PA5359	405.148	426.314	463.657	788.063	563.639	511.804	431.706	621.169	-0.52544	0.0201734	0.104652	PA5359	NC_002516.2	6026219	6026674	-	456	protein_coding	hypothetical protein&&-- && PF03640:Secreted repeat of unknown function	-	NOT_CHANGE
PA5358	523.439	490.848	540.243	496.925	428.213	534.925	518.177	486.688	0.0907724	0.600484	0.779327	ubiA	NC_002516.2	6025305	6026195	+	891	protein_coding	4-hydroxybenzoate octaprenyltransferase&&sp|B7V5P9|UBIA_PSEA8 4-hydroxybenzoate octaprenyltransferase OS=Pseudomonas aeruginosa (strain LESB58) OX=557722 GN=ubiA PE=3 SV=1 && PF01040:UbiA prenyltransferase family	UbiA	NOT_CHANGE
PA5357	193.209	143.734	151.102	123.283	141.148	162.895	162.682	142.442	0.193128	0.406631	0.630793	PA5357	NC_002516.2	6024742	6025278	+	537	protein_coding	hypothetical protein&&sp|Q9HTK1|UBIC_PSEAE Probable chorismate pyruvate-lyase OS=Pseudomonas aeruginosa (strain ATCC 15692 / DSM 22644 / CIP 104116 / JCM 14847 / LMG 12228 / 1C / PRS 101 / PAO1) OX=208964 GN=ubiC PE=3 SV=1 && PF04345:Chorismate lyase	-	NOT_CHANGE
PA5356	283.899	319.736	351.882	521.582	427.259	379.387	318.506	442.743	-0.475919	0.0219829	0.110871	glcC	NC_002516.2	6023907	6024662	+	756	protein_coding	DNA-binding transcriptional regulator GlcC&&sp|P0ACL6|GLCC_ECOL6 Glc operon transcriptional activator OS=Escherichia coli O6:H1 (strain CFT073 / ATCC 700928 / UPEC) OX=199310 GN=glcC PE=3 SV=1 && PF00392:Bacterial regulatory proteins, gntR family|PF07729:FCD domain	FCD	NOT_CHANGE
PA5355	325.301	352.003	354.987	652.452	450.148	574.86	344.097	559.153	-0.700438	0.000688797	0.00981367	glcD	NC_002516.2	6022203	6023702	-	1500	protein_coding	glycolate oxidase subunit GlcD&&sp|P0AEQ0|GLCD_ECOL6 Glycolate oxidase subunit GlcD OS=Escherichia coli O6:H1 (strain CFT073 / ATCC 700928 / UPEC) OX=199310 GN=glcD PE=3 SV=1 && PF01565:FAD binding domain|PF02913:FAD linked oxidases, C-terminal domain	FAD_binding_4	NOT_CHANGE
PA5354	86.747	96.8008	108.67	186.821	117.306	135.57	97.4058	146.566	-0.590607	0.0250599	0.119215	glcE	NC_002516.2	6021124	6022203	-	1080	protein_coding	glycolate oxidase FAD binding subunit&&sp|P52073|GLCE_ECOLI Glycolate oxidase subunit GlcE OS=Escherichia coli (strain K12) OX=83333 GN=glcE PE=1 SV=1 && PF01565:FAD binding domain	FAD_binding_4	NOT_CHANGE
PA5353	72.9463	79.2006	102.46	184.925	84.8796	109.297	84.8689	126.367	-0.575734	0.0924939	0.267844	glcF	NC_002516.2	6019888	6021114	-	1227	protein_coding	glycolate oxidase iron-sulfur subunit&&sp|P52074|GLCF_ECOLI Glycolate oxidase iron-sulfur subunit OS=Escherichia coli (strain K12) OX=83333 GN=glcF PE=1 SV=1 && PF12838:4Fe-4S dicluster domain|PF02754:Cysteine-rich domain	-	NOT_CHANGE
PA5352	42.3877	32.2669	34.1533	85.3498	36.2407	46.241	36.2693	55.9439	-0.626604	0.109141	0.292854	PA5352	NC_002516.2	6019482	6019883	-	402	protein_coding	hypothetical protein&&sp|P0AEQ2|GLCG_ECOL6 Protein GlcG OS=Escherichia coli O6:H1 (strain CFT073 / ATCC 700928 / UPEC) OX=199310 GN=glcG PE=3 SV=1 && PF03928:Haem-degrading	DUF336	NOT_CHANGE
PA5351	118.291	134.934	140.753	83.4531	145.917	125.061	131.326	118.144	0.152939	0.571849	0.756926	rubA1	NC_002516.2	6019181	6019348	-	168	protein_coding	rubredoxin&&sp|Q9HTK7|RUBR1_PSEAE Rubredoxin-1 OS=Pseudomonas aeruginosa (strain ATCC 15692 / DSM 22644 / CIP 104116 / JCM 14847 / LMG 12228 / 1C / PRS 101 / PAO1) OX=208964 GN=rubA1 PE=1 SV=1 && PF00301:Rubredoxin	Rubredoxin	NOT_CHANGE
PA5350	344.031	446.848	447.098	323.381	391.018	404.609	412.659	373.003	0.146008	0.476692	0.690099	rubA2	NC_002516.2	6018830	6018997	-	168	protein_coding	rubredoxin&&sp|Q9HTK8|RUBR2_PSEAE Rubredoxin-2 OS=Pseudomonas aeruginosa (strain ATCC 15692 / DSM 22644 / CIP 104116 / JCM 14847 / LMG 12228 / 1C / PRS 101 / PAO1) OX=208964 GN=rubA2 PE=1 SV=1 && PF00301:Rubredoxin	Rubredoxin	NOT_CHANGE
PA5349	1595.95	1955.57	1844.28	1375.08	1807.27	1586.91	1798.6	1589.75	0.178072	0.340585	0.573113	PA5349	NC_002516.2	6017624	6018778	-	1155	protein_coding	rubredoxin reductase&&sp|Q9HTK9|RURE_PSEAE Rubredoxin-NAD(+) reductase OS=Pseudomonas aeruginosa (strain ATCC 15692 / DSM 22644 / CIP 104116 / JCM 14847 / LMG 12228 / 1C / PRS 101 / PAO1) OX=208964 GN=alkT PE=1 SV=1 && PF18113:Rubredoxin binding C-terminal domain|PF07992:Pyridine nucleotide-disulphide oxidoreductase	Pyr_redox_2	NOT_CHANGE
PA5348	2559.04	3659.85	4128.41	10579.6	6484.23	3979.88	3449.1	7014.56	-1.02418	0.00473132	0.040649	PA5348	NC_002516.2	6017150	6017422	-	273	protein_coding	DNA-binding protein&&sp|Q9HTL0|DBHA_PSEAE DNA-binding protein HU-alpha OS=Pseudomonas aeruginosa (strain ATCC 15692 / DSM 22644 / CIP 104116 / JCM 14847 / LMG 12228 / 1C / PRS 101 / PAO1) OX=208964 GN=hupA PE=3 SV=1 && PF00216:Bacterial DNA-binding protein	-	DOWN
PA5347	322.344	352.003	417.084	382.177	435.842	361.521	363.81	393.18	-0.112714	0.560921	0.750568	PA5347	NC_002516.2	6016622	6017014	-	393	protein_coding	hypothetical protein&&-- && -	-	NOT_CHANGE
PA5346	4520.7	5884.31	5351.72	4345.25	4736.09	5028.71	5252.24	4703.35	0.159277	0.363009	0.5913	PA5346	NC_002516.2	6015141	6016550	+	1410	protein_coding	hypothetical protein&&-- && PF08668:HDOD domain|PF04073:Aminoacyl-tRNA editing domain	-	NOT_CHANGE
PA5345	3084.45	2340.82	2358.65	1511.64	1813.94	1747.7	2594.64	1691.09	0.617641	0.00140497	0.0169686	recG	NC_002516.2	6012976	6015051	+	2076	protein_coding	ATP-dependent DNA helicase RecG&&sp|Q8XD86|RECG_ECO57 ATP-dependent DNA helicase RecG OS=Escherichia coli O157:H7 OX=83334 GN=recG PE=3 SV=1 && PF17191:RecG wedge domain|PF00270:DEAD/DEAH box helicase|PF00271:Helicase conserved C-terminal domain	DEAD	NOT_CHANGE
PA5344	2425.96	2075.84	2141.31	2223.84	2161.09	2197.5	2214.37	2194.14	0.0132543	0.927767	0.965008	oxyR	NC_002516.2	6012047	6012979	+	933	protein_coding	transcriptional regulator&&sp|P0ACQ6|OXYR_ECO57 Hydrogen peroxide-inducible genes activator OS=Escherichia coli O157:H7 OX=83334 GN=oxyR PE=3 SV=1 && PF03466:LysR substrate binding domain|PF00126:Bacterial regulatory helix-turn-helix protein, lysR family	LysR_substrate	NOT_CHANGE
PA5343	618.072	500.626	482.286	585.12	570.315	544.383	533.661	566.606	-0.0864036	0.63003	0.800458	PA5343	NC_002516.2	6011058	6011909	-	852	protein_coding	hypothetical protein&&-- && PF01370:NAD dependent epimerase/dehydratase family	Epimerase	NOT_CHANGE
PA5342	333.187	348.092	361.197	253.204	279.435	304.77	347.492	279.137	0.316613	0.0691225	0.221346	PA5342	NC_002516.2	6010258	6011058	-	801	protein_coding	transcriptional regulator&&-- && PF12833:Helix-turn-helix domain|PF02311:AraC-like ligand binding domain	AraC_binding	NOT_CHANGE
PA5341	95.6188	93.8674	95.2152	80.6081	65.8055	81.9728	94.9005	76.1288	0.319055	0.168912	0.38228	PA5341	NC_002516.2	6009571	6010191	-	621	protein_coding	hypothetical protein&&-- && PF01810:LysE type translocator	-	NOT_CHANGE
PA5340	1681.71	1604.55	1653.85	302.518	440.611	458.207	1646.7	400.445	2.04045	7.56e-22	4.12e-19	PA5340	NC_002516.2	6008833	6009564	+	732	protein_coding	hypothetical protein&&-- && -	-	UP
PA5339	4145.13	4632.75	4625.18	1040.32	1431.51	1732.99	4467.69	1401.61	1.67266	3.21e-13	6.24e-11	PA5339	NC_002516.2	6008398	6008778	+	381	protein_coding	hypothetical protein&&sp|P40431|YVN1_AZOVI RutC family protein in vnfA 5'region OS=Azotobacter vinelandii OX=354 PE=3 SV=2 && PF01042:Endoribonuclease L-PSP	Ribonuc_L-PSP	UP
PA5338	6936.8	5151.95	5097.12	1993.39	2505.38	3026.69	5728.62	2508.49	1.19148	4.16e-07	2.14e-05	spoT	NC_002516.2	6006231	6008336	+	2106	protein_coding	guanosine-3'%2C5'-bis(diphosphate) 3'-pyrophosphohydrolase&&sp|P0AG25|SPOT_ECO57 Guanosine-3',5'-bis(diphosphate) 3'-pyrophosphohydrolase OS=Escherichia coli O157:H7 OX=83334 GN=spoT PE=3 SV=1 && PF04607:Region found in RelA / SpoT proteins|PF13291:ACT domain|PF02824:TGS domain|PF13328:HD domain	-	UP
PA5337	2170.65	1835.3	2097.84	1174.98	1250.31	1378.82	2034.6	1268.04	0.682292	2.77e-05	0.000738819	rpoZ	NC_002516.2	6005899	6006165	+	267	protein_coding	DNA-directed RNA polymerase subunit omega&&sp|A6VEE4|RPOZ_PSEA7 DNA-directed RNA polymerase subunit omega OS=Pseudomonas aeruginosa (strain PA7) OX=381754 GN=rpoZ PE=3 SV=1 && PF01192:RNA polymerase Rpb6	-	NOT_CHANGE
PA5336	759.036	536.804	626.144	289.241	475.898	552.791	640.661	439.31	0.544816	0.0572038	0.19835	gmk	NC_002516.2	6005199	6005810	+	612	protein_coding	guanylate kinase&&sp|Q9HTM2|KGUA_PSEAE Guanylate kinase OS=Pseudomonas aeruginosa (strain ATCC 15692 / DSM 22644 / CIP 104116 / JCM 14847 / LMG 12228 / 1C / PRS 101 / PAO1) OX=208964 GN=gmk PE=3 SV=1 && PF00625:Guanylate kinase	-	NOT_CHANGE
PA5335	1038.01	903.474	884.881	524.427	663.778	880.682	942.12	689.629	0.450602	0.058757	0.201422	PA5335	NC_002516.2	6004277	6005140	+	864	protein_coding	hypothetical protein&&sp|P44726|Y467_HAEIN UPF0701 protein HI_0467 OS=Haemophilus influenzae (strain ATCC 51907 / DSM 11121 / KW20 / Rd) OX=71421 GN=HI_0467 PE=1 SV=1 && PF08340:Domain of unknown function (DUF1732)|PF03755:YicC-like family, N-terminal region	-	NOT_CHANGE
PA5334	1386.97	1304.37	1380.62	1022.3	1104.39	1262.17	1357.32	1129.62	0.26517	0.0989473	0.27815	rph	NC_002516.2	6003377	6004096	-	720	protein_coding	ribonuclease PH&&sp|B7V5M5|RNPH_PSEA8 Ribonuclease PH OS=Pseudomonas aeruginosa (strain LESB58) OX=557722 GN=rph PE=3 SV=1 && PF01138:3' exoribonuclease family, domain 1|PF03725:3' exoribonuclease family, domain 2	RNase_PH	NOT_CHANGE
PA5333	358.817	455.648	479.181	402.092	392.926	404.609	431.215	399.876	0.10869	0.563952	0.752903	PA5333	NC_002516.2	6002959	6003330	-	372	protein_coding	hypothetical protein&&-- && PF09685:Domain of unknown function (DUF4870)	-	NOT_CHANGE
PA5332	3481.71	3634.43	3711.32	3494.6	3313.17	3515.37	3609.15	3441.05	0.068822	0.598492	0.777483	crc	NC_002516.2	6002121	6002900	+	780	protein_coding	catabolite repression control protein&&sp|P37454|EXOA_BACSU Exodeoxyribonuclease OS=Bacillus subtilis (strain 168) OX=224308 GN=exoA PE=1 SV=1 && PF03372:Endonuclease/Exonuclease/phosphatase family	Exo_endo_phos	NOT_CHANGE
PA5331	1875.9	1695.48	1761.48	1398.79	1525.93	1628.95	1777.62	1517.89	0.228031	0.130001	0.325421	pyrE	NC_002516.2	6001399	6002040	-	642	protein_coding	orotate phosphoribosyltransferase&&sp|Q02E31|PYRE_PSEAB Orotate phosphoribosyltransferase OS=Pseudomonas aeruginosa (strain UCBPP-PA14) OX=208963 GN=pyrE PE=3 SV=1 && PF00156:Phosphoribosyl transferase domain	Pribosyltran	NOT_CHANGE
PA5330	1371.19	1207.57	1287.48	1008.08	1191.18	1209.62	1288.74	1136.29	0.181775	0.266665	0.499386	PA5330	NC_002516.2	6000761	6001378	-	618	protein_coding	hypothetical protein&&-- && -	-	NOT_CHANGE
PA5329	457.393	445.87	416.049	522.53	428.213	463.461	439.771	471.402	-0.10017	0.557967	0.748582	PA5329	NC_002516.2	6000317	6000781	+	465	protein_coding	hypothetical protein&&-- && PF03061:Thioesterase superfamily	4HBT	NOT_CHANGE
PA5328	18.7295	45.9559	25.8737	17.07	36.2407	27.3243	30.1864	26.8783	0.169051	0.71327	0.852949	PA5328	NC_002516.2	5999754	6000143	-	390	protein_coding	mono-heme cytochrome C&&sp|Q8KG93|C555_CHLTE Cytochrome c-555 OS=Chlorobaculum tepidum (strain ATCC 49652 / DSM 12025 / NBRC 103806 / TLS) OX=194439 GN=CT0075 PE=1 SV=1 && PF13442:Cytochrome C oxidase, cbb3-type, subunit III	-	NOT_CHANGE
PA5327	43.3735	55.7338	44.5028	51.2099	65.8055	60.9541	47.87	59.3232	-0.308155	0.271513	0.504698	PA5327	NC_002516.2	5998348	5999676	-	1329	protein_coding	oxidoreductase&&sp|P9WIT2|GULDH_MYCTO L-gulono-1,4-lactone dehydrogenase OS=Mycobacterium tuberculosis (strain CDC 1551 / Oshkosh) OX=83331 GN=MT1821 PE=3 SV=1 && PF01565:FAD binding domain|PF04030:D-arabinono-1,4-lactone oxidase	ALO	NOT_CHANGE
PA5326	67.0318	45.9559	42.4329	60.6932	60.0833	62.005	51.8068	60.9272	-0.232529	0.422437	0.644903	PA5326	NC_002516.2	5997057	5998265	-	1209	protein_coding	hypothetical protein&&-- && PF01168:Alanine racemase, N-terminal domain	Ala_racemase_N	NOT_CHANGE
PA5325	31.5444	27.378	32.0834	32.2433	41.963	33.6298	30.3352	35.9454	-0.246568	0.446562	0.664959	PA5325	NC_002516.2	5996036	5996986	+	951	protein_coding	hypothetical protein&&-- && PF13557:Putative MetA-pathway of phenol degradation	-	NOT_CHANGE
PA5324	314.458	399.914	350.847	312.001	391.972	378.336	355.073	360.77	-0.022628	0.909036	0.955968	PA5324	NC_002516.2	5994741	5995811	-	1071	protein_coding	transcriptional regulator&&sp|P9WMJ0|Y1395_MYCTO Uncharacterized HTH-type transcriptional regulator MT1440 OS=Mycobacterium tuberculosis (strain CDC 1551 / Oshkosh) OX=83331 GN=MT1440 PE=4 SV=1 && PF12625:Arabinose-binding domain of AraC transcription regulator, N-term|PF12833:Helix-turn-helix domain	-	NOT_CHANGE
PA5323	2667.47	3202.25	2903.03	1403.53	2486.3	2190.14	2924.25	2026.66	0.529015	0.0355206	0.149406	argB	NC_002516.2	5993791	5994696	+	906	protein_coding	acetylglutamate kinase&&sp|B7V5L4|ARGB_PSEA8 Acetylglutamate kinase OS=Pseudomonas aeruginosa (strain LESB58) OX=557722 GN=argB PE=3 SV=1 && PF00696:Amino acid kinase family	AA_kinase	NOT_CHANGE
PA5322	5460.13	5325.02	4879.78	2759.64	4291.67	4066.06	5221.64	3705.79	0.494772	0.0244001	0.118153	algC	NC_002516.2	5991168	5993774	+	2607	protein_coding	phosphomannomutase&&sp|Q02E40|ALGC_PSEAB Phosphomannomutase/phosphoglucomutase OS=Pseudomonas aeruginosa (strain UCBPP-PA14) OX=208963 GN=algC PE=1 SV=2 && PF00408:Phosphoglucomutase/phosphomannomutase, C-terminal domain|PF02878:Phosphoglucomutase/phosphomannomutase, alpha/beta/alpha domain I|PF02880:Phosphoglucomutase/phosphomannomutase, alpha/beta/alpha domain III|PF02879:Phosphoglucomutase/pho…	PGM_PMM_II	NOT_CHANGE
PA5321	1075.47	791.028	866.251	545.29	635.166	792.403	910.915	657.62	0.470493	0.0373279	0.154367	dut	NC_002516.2	5990676	5991131	+	456	protein_coding	deoxyuridine 5'-triphosphate nucleotidohydrolase&&sp|B7V5L2|DUT_PSEA8 Deoxyuridine 5'-triphosphate nucleotidohydrolase OS=Pseudomonas aeruginosa (strain LESB58) OX=557722 GN=dut PE=3 SV=1 && PF00692:dUTPase	-	NOT_CHANGE
PA5320	1272.62	1069.7	1212.96	870.568	1036.68	1027.81	1185.09	978.352	0.276664	0.104403	0.28678	coaC	NC_002516.2	5989460	5990668	+	1209	protein_coding	bifunctional phosphopantothenoylcysteine decarboxylase/phosphopantothenate synthase&&sp|Q9KVD1|COABC_VIBCH Coenzyme A biosynthesis bifunctional protein CoaBC OS=Vibrio cholerae serotype O1 (strain ATCC 39315 / El Tor Inaba N16961) OX=243277 GN=coaBC PE=3 SV=1 && PF04127:DNA / pantothenate metabolism flavoprotein|PF02441:Flavoprotein	DFP	NOT_CHANGE
PA5319	413.034	500.626	494.705	483.649	474.944	481.327	469.455	479.973	-0.0320619	0.848864	0.92642	radC	NC_002516.2	5988646	5989320	-	675	protein_coding	DNA repair protein RadC&&sp|Q9HTN5|Y5319_PSEAE UPF0758 protein PA5319 OS=Pseudomonas aeruginosa (strain ATCC 15692 / DSM 22644 / CIP 104116 / JCM 14847 / LMG 12228 / 1C / PRS 101 / PAO1) OX=208964 GN=PA5319 PE=3 SV=1 && PF04002:RadC-like JAB domain	RadC	NOT_CHANGE
PA5318	215.882	179.913	188.361	202.943	206.954	209.136	194.718	206.344	-0.0834352	0.653772	0.815322	PA5318	NC_002516.2	5988081	5988629	+	549	protein_coding	hypothetical protein&&-- && -	-	NOT_CHANGE
PA5317	1378.09	1319.03	1242.97	1640.61	1428.65	1570.09	1313.37	1546.45	-0.23561	0.115607	0.303913	PA5317	NC_002516.2	5986475	5988055	+	1581	protein_coding	dipeptide ABC transporter substrate-binding protein&&sp|A0A0H2ZI72|DPPA5_PSEAB Probable di/tripeptide-binding protein 5 OS=Pseudomonas aeruginosa (strain UCBPP-PA14) OX=208963 GN=dppA5 PE=1 SV=1 && PF00496:Bacterial extracellular solute-binding proteins, family 5 Middle	-	NOT_CHANGE
PA5316_1	372.618	313.869	377.756	219.064	302.324	358.368	354.748	293.252	0.275409	0.252986	0.483854	PA5316_1	NC_002516.2	5986120	5986170	+	51	protein_coding	Product name confidence: class 1: Function experimentally demonstrated in P. aeruginosa.&&-- && -	-	NOT_CHANGE
PA5316	5742.06	6276.41	6892.75	3431.06	5619.22	6504.22	6303.74	5184.83	0.281951	0.289778	0.521777	rpmB	NC_002516.2	5985883	5986119	-	237	protein_coding	50S ribosomal protein L28&&sp|A6VEC3|RL28_PSEA7 50S ribosomal protein L28 OS=Pseudomonas aeruginosa (strain PA7) OX=381754 GN=rpmB PE=3 SV=1 && PF00830:Ribosomal L28 family	-	NOT_CHANGE
PA5315	241.511	314.847	349.812	153.63	320.444	256.428	302.057	243.501	0.310926	0.315284	0.5478	rpmG	NC_002516.2	5985716	5985871	-	156	protein_coding	50S ribosomal protein L33&&sp|Q9HTN9|RL33_PSEAE 50S ribosomal protein L33 OS=Pseudomonas aeruginosa (strain ATCC 15692 / DSM 22644 / CIP 104116 / JCM 14847 / LMG 12228 / 1C / PRS 101 / PAO1) OX=208964 GN=rpmG PE=1 SV=1 && PF00471:Ribosomal protein L33	-	NOT_CHANGE
PA5314	203.067	281.602	241.143	310.104	323.305	159.742	241.937	264.384	-0.128992	0.677666	0.830801	PA5314	NC_002516.2	5985219	5985581	+	363	protein_coding	hypothetical protein&&-- && PF05899:Protein of unknown function (DUF861)	Cupin_3	NOT_CHANGE
PA5313	961.117	1201.7	1097.04	1444.31	1729.06	1309.46	1086.62	1494.28	-0.459739	0.0168249	0.0941884	PA5313	NC_002516.2	5983820	5985154	+	1335	protein_coding	omega amino acid--pyruvate transaminase&&sp|Q9A3Q9|APTA_CAUVC Omega-aminotransferase OS=Caulobacter vibrioides (strain ATCC 19089 / CB15) OX=190650 GN=aptA PE=1 SV=1 && PF00202:Aminotransferase class-III	Aminotran_3	NOT_CHANGE
PA5312	7714.57	9017.14	8675.97	9372.35	9152.69	8999.14	8469.22	9174.73	-0.115445	0.418212	0.641388	PA5312	NC_002516.2	5982097	5983590	-	1494	protein_coding	aldehyde dehydrogenase&&sp|P23883|PUUC_ECOLI NADP/NAD-dependent aldehyde dehydrogenase PuuC OS=Escherichia coli (strain K12) OX=83333 GN=puuC PE=1 SV=2 && PF00171:Aldehyde dehydrogenase family	Aldedh	NOT_CHANGE
PA5311	181.38	158.401	158.347	112.851	164.991	116.654	166.043	131.499	0.33576	0.159896	0.372122	PA5311	NC_002516.2	5980787	5981950	-	1164	protein_coding	major facilitator superfamily transporter&&-- && PF07690:Major Facilitator Superfamily	MFS_1	NOT_CHANGE
PA5310	313.472	231.735	280.471	270.274	262.268	326.84	275.226	286.461	-0.0571094	0.78686	0.89178	PA5310	NC_002516.2	5979194	5980783	+	1590	protein_coding	hypothetical protein&&sp|P75919|CLSC_ECOLI Cardiolipin synthase C OS=Escherichia coli (strain K12) OX=83333 GN=clsC PE=1 SV=2 && PF13091:PLD-like domain	-	NOT_CHANGE
PA5309	734.392	533.871	570.256	642.968	673.315	565.402	612.84	627.228	-0.0336709	0.86748	0.934936	PA5309	NC_002516.2	5977789	5979108	+	1320	protein_coding	oxidoreductase&&sp|P37906|PUUB_ECOLI Gamma-glutamylputrescine oxidoreductase OS=Escherichia coli (strain K12) OX=83333 GN=puuB PE=1 SV=2 && PF01266:FAD dependent oxidoreductase	DAO	NOT_CHANGE
PA5308	538.226	537.782	610.619	569.947	473.037	464.512	562.209	502.499	0.161479	0.364671	0.592944	lrp	NC_002516.2	5977123	5977611	+	489	protein_coding	leucine-responsive regulatory protein&&sp|P0ACJ2|LRP_ECO57 Leucine-responsive regulatory protein OS=Escherichia coli O157:H7 OX=83334 GN=lrp PE=3 SV=2 && PF13412:Winged helix-turn-helix DNA-binding|PF01037:Lrp/AsnC ligand binding domain	AsnC_trans_reg	NOT_CHANGE
PA5307	1519.06	1327.83	1428.23	1993.39	1656.58	1516.5	1425.04	1722.16	-0.273374	0.128246	0.322658	PA5307	NC_002516.2	5974402	5976969	-	2568	protein_coding	hypothetical protein&&-- && PF11739:Dicarboxylate transport	-	NOT_CHANGE
PA5306	607.229	617.96	653.052	1108.6	732.444	700.972	626.08	847.338	-0.4369	0.0616969	0.208015	PA5306	NC_002516.2	5974190	5974381	-	192	protein_coding	hypothetical protein&&sp|P64449|YNBE_ECOL6 Uncharacterized protein YnbE OS=Escherichia coli O6:H1 (strain CFT073 / ATCC 700928 / UPEC) OX=199310 GN=ynbE PE=4 SV=1 && PF13617:YnbE-like lipoprotein	-	NOT_CHANGE
PA5305	2089.81	2456.2	2277.92	3255.62	2782.91	2598.96	2274.64	2879.16	-0.340083	0.0473017	0.177814	PA5305	NC_002516.2	5973833	5974177	-	345	protein_coding	hypothetical protein&&-- && PF07027:Protein of unknown function (DUF1318)	-	NOT_CHANGE
PA5304	8997.04	10583.6	10053.5	9344.85	9682.95	9666.48	9878.03	9564.76	0.0464965	0.745474	0.871354	dadA	NC_002516.2	5972178	5973476	-	1299	protein_coding	D-amino acid dehydrogenase small subunit&&sp|Q9HTQ0|DADA1_PSEAE D-amino acid dehydrogenase 1 OS=Pseudomonas aeruginosa (strain ATCC 15692 / DSM 22644 / CIP 104116 / JCM 14847 / LMG 12228 / 1C / PRS 101 / PAO1) OX=208964 GN=dadA1 PE=1 SV=1 && PF01266:FAD dependent oxidoreductase	DAO	NOT_CHANGE
PA5303	3830.67	4497.81	4029.05	3557.19	3799.55	3194.84	4119.18	3517.19	0.227877	0.155336	0.36502	PA5303	NC_002516.2	5971850	5972203	-	354	protein_coding	hypothetical protein&&sp|P0AEB8|YOAB_ECOL6 RutC family protein YoaB OS=Escherichia coli O6:H1 (strain CFT073 / ATCC 700928 / UPEC) OX=199310 GN=yoaB PE=3 SV=1 && PF01042:Endoribonuclease L-PSP	Ribonuc_L-PSP	NOT_CHANGE
PA5302	3103.18	2885.44	2830.58	2117.62	2800.07	2313.1	2939.73	2410.27	0.286476	0.103954	0.286353	dadX	NC_002516.2	5970686	5971759	-	1074	protein_coding	alanine racemase&&sp|Q9HTQ2|ALR2_PSEAE Alanine racemase, catabolic OS=Pseudomonas aeruginosa (strain ATCC 15692 / DSM 22644 / CIP 104116 / JCM 14847 / LMG 12228 / 1C / PRS 101 / PAO1) OX=208964 GN=dadX PE=1 SV=1 && PF01168:Alanine racemase, N-terminal domain|PF00842:Alanine racemase, C-terminal domain	Ala_racemase_N	NOT_CHANGE
PA5301	1529.9	1824.55	1719.05	1842.61	2411.92	1711.97	1691.17	1988.83	-0.234012	0.247202	0.477691	PA5301	NC_002516.2	5969987	5970535	-	549	protein_coding	transcriptional regulator&&sp|P0A9U6|PUUR_ECOLI HTH-type transcriptional regulator PuuR OS=Escherichia coli (strain K12) OX=83333 GN=puuR PE=1 SV=1 && PF01381:Helix-turn-helix|PF07883:Cupin domain	Cupin_2	NOT_CHANGE
PA5300	2292.88	2202.95	2696.04	1547.68	2185.89	2254.25	2397.29	1995.94	0.264396	0.219167	0.446507	cycB	NC_002516.2	5969355	5969765	-	411	protein_coding	cytochrome C5&&sp|P00121|CYC5_PSEME Cytochrome c5 OS=Pseudomonas mendocina OX=300 PE=1 SV=1 && PF13442:Cytochrome C oxidase, cbb3-type, subunit III	-	NOT_CHANGE
PA5299	392.333	381.336	400.525	464.682	393.88	454.003	391.398	437.522	-0.160616	0.333013	0.564666	PA5299	NC_002516.2	5967286	5969145	-	1860	protein_coding	hypothetical protein&&sp|P38942|CAT2_CLOK5 4-hydroxybutyrate coenzyme A transferase OS=Clostridium kluyveri (strain ATCC 8527 / DSM 555 / NCIMB 10680) OX=431943 GN=cat2 PE=3 SV=3 && PF13336:Acetyl-CoA hydrolase/transferase C-terminal domain	-	NOT_CHANGE
PA5298	961.117	762.673	782.421	340.451	570.315	691.514	835.403	534.093	0.645863	0.0249446	0.119161	PA5298	NC_002516.2	5966706	5967278	+	573	protein_coding	xanthine phosphoribosyltransferase&&sp|Q9HTQ6|XPT_PSEAE Xanthine phosphoribosyltransferase OS=Pseudomonas aeruginosa (strain ATCC 15692 / DSM 22644 / CIP 104116 / JCM 14847 / LMG 12228 / 1C / PRS 101 / PAO1) OX=208964 GN=xpt PE=3 SV=1 && PF00156:Phosphoribosyl transferase domain	Pribosyltran	NOT_CHANGE
PA5297	465.279	536.804	504.02	795.65	518.815	475.022	502.034	596.495	-0.249107	0.317448	0.550156	poxB	NC_002516.2	5964859	5966577	+	1719	protein_coding	pyruvate dehydrogenase&&sp|P07003|POXB_ECOLI Pyruvate dehydrogenase [ubiquinone] OS=Escherichia coli (strain K12) OX=83333 GN=poxB PE=1 SV=1 && PF02776:Thiamine pyrophosphate enzyme, N-terminal TPP binding domain|PF00205:Thiamine pyrophosphate enzyme, central domain|PF02775:Thiamine pyrophosphate enzyme, C-terminal TPP binding domain	TPP_enzyme_N	NOT_CHANGE
PA5296	1756.63	1457.88	1425.12	647.71	1490.64	1519.65	1546.54	1219.33	0.343099	0.301385	0.534738	rep	NC_002516.2	5962716	5964725	+	2010	protein_coding	ATP-dependent DNA helicase Rep&&sp|P09980|REP_ECOLI ATP-dependent DNA helicase Rep OS=Escherichia coli (strain K12) OX=83333 GN=rep PE=1 SV=3 && PF13361:UvrD-like helicase C-terminal domain|PF00580:UvrD/REP helicase N-terminal domain	UvrD-helicase	NOT_CHANGE
PA5295	1288.39	1329.79	1209.85	844.015	1082.45	1232.74	1276.01	1053.07	0.277355	0.16502	0.378226	PA5295	NC_002516.2	5960852	5962528	-	1677	protein_coding	hypothetical protein&&sp|Q9I310|Y1727_PSEAE Uncharacterized signaling protein PA1727 OS=Pseudomonas aeruginosa (strain ATCC 15692 / DSM 22644 / CIP 104116 / JCM 14847 / LMG 12228 / 1C / PRS 101 / PAO1) OX=208964 GN=PA1727 PE=1 SV=1 && PF00990:Diguanylate cyclase, GGDEF domain|PF00563:EAL domain	EAL	NOT_CHANGE
PA5294	99.5619	85.0673	97.2851	73.9698	67.7129	74.6162	93.9714	72.0997	0.38242	0.0985609	0.278072	PA5294	NC_002516.2	5959474	5960940	+	1467	protein_coding	multidrug efflux protein NorA&&sp|Q9HTR0|NORM_PSEAE Probable multidrug resistance protein NorM OS=Pseudomonas aeruginosa (strain ATCC 15692 / DSM 22644 / CIP 104116 / JCM 14847 / LMG 12228 / 1C / PRS 101 / PAO1) OX=208964 GN=norM PE=3 SV=1 && PF01554:MatE	MatE	NOT_CHANGE
PA5293	82.8039	142.757	116.949	122.335	117.306	122.959	114.17	120.866	-0.0820335	0.754847	0.876311	PA5293	NC_002516.2	5958408	5959325	-	918	protein_coding	transcriptional regulator&&sp|P0A9F8|GCVA_ECO57 Glycine cleavage system transcriptional activator OS=Escherichia coli O157:H7 OX=83334 GN=gcvA PE=3 SV=1 && PF03466:LysR substrate binding domain|PF00126:Bacterial regulatory helix-turn-helix protein, lysR family	LysR_substrate	NOT_CHANGE
PA5292	346.002	378.403	377.756	439.077	401.509	315.28	367.387	385.289	-0.0694926	0.727535	0.864127	pchP	NC_002516.2	5957208	5958257	-	1050	protein_coding	phosphorylcholine phosphatase&&-- && -	-	NOT_CHANGE
PA5291	2262.32	2177.53	2300.69	946.434	1133.95	1481.82	2246.85	1187.4	0.920392	1.69e-05	0.000493318	PA5291	NC_002516.2	5955180	5957165	+	1986	protein_coding	choline transporter&&sp|Q6F754|GBTR_ACIAD Glycine betaine transporter OS=Acinetobacter baylyi (strain ATCC 33305 / BD413 / ADP1) OX=62977 GN=ACIAD3460 PE=1 SV=1 && PF02028:BCCT, betaine/carnitine/choline family transporter	-	NOT_CHANGE
PA5290	292.771	274.758	292.89	242.773	332.843	353.113	286.806	309.576	-0.109585	0.607799	0.785061	PA5290	NC_002516.2	5953562	5955055	+	1494	protein_coding	hypothetical protein&&sp|P45049|COMM_HAEIN Competence protein ComM OS=Haemophilus influenzae (strain ATCC 51907 / DSM 11121 / KW20 / Rd) OX=71421 GN=comM PE=1 SV=1 && PF13335:Magnesium chelatase, subunit ChlI C-terminal|PF13541:Subunit ChlI of Mg-chelatase|PF01078:Magnesium chelatase, subunit ChlI	-	NOT_CHANGE
PA5289	501.752	444.892	528.858	541.497	456.824	487.633	491.834	495.318	-0.0104715	0.951998	0.975457	PA5289	NC_002516.2	5953261	5953521	+	261	protein_coding	hypothetical protein&&sp|Q46868|UBIK_ECOLI Ubiquinone biosynthesis accessory factor UbiK OS=Escherichia coli (strain K12) OX=83333 GN=ubiK PE=1 SV=2 && PF04380:Membrane fusogenic activity	-	NOT_CHANGE
PA5288	4614.35	5113.82	4929.46	6669.61	5570.58	5477.46	4885.87	5905.88	-0.273571	0.0888103	0.26036	glnK	NC_002516.2	5952483	5952821	-	339	protein_coding	nitrogen regulatory protein P-II 2&&sp|P0AC57|GLNK_ECO57 Nitrogen regulatory protein GlnK OS=Escherichia coli O157:H7 OX=83334 GN=glnK PE=3 SV=1 && PF00543:Nitrogen regulatory protein P-II	-	NOT_CHANGE
PA5287	999.562	982.674	890.055	979.626	1008.06	1004.69	957.43	997.461	-0.0589445	0.683271	0.833358	amtB	NC_002516.2	5951115	5952443	-	1329	protein_coding	ammonium transporter&&sp|O66515|AMT_AQUAE Ammonium transporter OS=Aquifex aeolicus (strain VF5) OX=224324 GN=amt PE=1 SV=1 && PF00909:Ammonium Transporter Family	Ammonium_transp	NOT_CHANGE
PA5286	229.682	204.357	255.632	146.043	247.009	232.256	229.891	208.436	0.141663	0.58753	0.769113	PA5286	NC_002516.2	5950429	5950854	-	426	protein_coding	hypothetical protein&&sp|P0AF49|YJBQ_ECO57 UPF0047 protein YjbQ OS=Escherichia coli O157:H7 OX=83334 GN=yjbQ PE=3 SV=1 && PF01894:Uncharacterised protein family UPF0047	-	NOT_CHANGE
PA5285	1011.39	1168.45	1227.45	923.674	1111.06	884.885	1135.76	973.208	0.222601	0.221816	0.449324	PA5285	NC_002516.2	5950034	5950351	-	318	protein_coding	hypothetical protein&&sp|A0A0H2ZJC1|SUTA_PSEAB Transcriptional regulator SutA OS=Pseudomonas aeruginosa (strain UCBPP-PA14) OX=208963 GN=sutA PE=1 SV=1 && -	-	NOT_CHANGE
PA5284	63.0887	68.445	82.7958	73.0215	61.037	98.7877	71.4432	77.6154	-0.117622	0.680597	0.831494	PA5284	NC_002516.2	5948696	5949610	-	915	protein_coding	hypothetical protein&&-- && PF00419:Fimbrial protein	-	NOT_CHANGE
PA5283	624.972	675.65	685.136	696.075	672.361	595.879	661.919	654.772	0.0152382	0.923819	0.963624	PA5283	NC_002516.2	5947295	5948671	+	1377	protein_coding	transcriptional regulator&&sp|Q2FKF1|NORG_STAA3 HTH-type transcriptional regulator NorG OS=Staphylococcus aureus (strain USA300) OX=367830 GN=norG PE=3 SV=2 && PF00155:Aminotransferase class I and II|PF00392:Bacterial regulatory proteins, gntR family	Aminotran_1_2	NOT_CHANGE
PA5282	41.402	54.756	57.9571	48.3649	43.8704	40.9864	51.3717	44.4072	0.207908	0.474429	0.687657	PA5282	NC_002516.2	5945963	5947132	-	1170	protein_coding	major facilitator superfamily transporter&&-- && PF07690:Major Facilitator Superfamily	MFS_1	NOT_CHANGE
PA5281	376.561	423.381	314.624	224.754	253.685	182.862	371.522	220.434	0.752432	0.000718976	0.0101427	PA5281	NC_002516.2	5945235	5945933	+	699	protein_coding	hydrolase&&sp|O59346|G3PP_PYRHO Glyceraldehyde 3-phosphate phosphatase OS=Pyrococcus horikoshii (strain ATCC 700860 / DSM 12428 / JCM 9974 / NBRC 100139 / OT-3) OX=70601 GN=PH1655 PE=1 SV=1 && PF13419:Haloacid dehalogenase-like hydrolase	-	NOT_CHANGE
PA5280	462.322	352.981	350.847	181.131	243.194	218.594	388.717	214.307	0.859359	0.000106886	0.00236669	sss	NC_002516.2	5944327	5945238	+	912	protein_coding	site-specific tyrosine recombinase XerC&&sp|Q51566|XERC_PSEAE Tyrosine recombinase XerC OS=Pseudomonas aeruginosa (strain ATCC 15692 / DSM 22644 / CIP 104116 / JCM 14847 / LMG 12228 / 1C / PRS 101 / PAO1) OX=208964 GN=xerC PE=3 SV=2 && PF02899:Phage integrase, N-terminal SAM-like domain|PF00589:Phage integrase family	Phage_integrase	NOT_CHANGE
PA5279	1398.79	1404.1	1215.03	1102.91	1106.3	1192.81	1339.31	1134	0.240297	0.116084	0.304176	PA5279	NC_002516.2	5943606	5944307	+	702	protein_coding	hypothetical protein&&-- && PF04340:Protein of unknown function, DUF484	-	NOT_CHANGE
PA5278	1241.07	1077.52	1081.52	725.473	760.102	903.802	1133.37	796.459	0.50935	0.00371355	0.0342263	dapF	NC_002516.2	5942745	5943575	+	831	protein_coding	diaminopimelate epimerase&&sp|B7V5G9|DAPF_PSEA8 Diaminopimelate epimerase OS=Pseudomonas aeruginosa (strain LESB58) OX=557722 GN=dapF PE=3 SV=1 && PF01678:Diaminopimelate epimerase	-	NOT_CHANGE
PA5277	3337.79	2766.16	2832.65	2648.69	2351.83	2829.11	2978.86	2609.88	0.190866	0.26159	0.492867	lysA	NC_002516.2	5941487	5942734	+	1248	protein_coding	diaminopimelate decarboxylase&&sp|P19572|DCDA_PSEAE Diaminopimelate decarboxylase OS=Pseudomonas aeruginosa (strain ATCC 15692 / DSM 22644 / CIP 104116 / JCM 14847 / LMG 12228 / 1C / PRS 101 / PAO1) OX=208964 GN=lysA PE=3 SV=2 && PF02784:Pyridoxal-dependent decarboxylase, pyridoxal binding domain|PF00278:Pyridoxal-dependent decarboxylase, C-terminal sheet domain	-	NOT_CHANGE
PA5276	84.7754	94.8452	89.0055	129.921	104.907	70.4125	89.5421	101.747	-0.186823	0.512773	0.716541	lppL	NC_002516.2	5941336	5941476	+	141	protein_coding	lipopeptide LppL&&sp|P17323|LPPL_PSEAE Lipopeptide OS=Pseudomonas aeruginosa (strain ATCC 15692 / DSM 22644 / CIP 104116 / JCM 14847 / LMG 12228 / 1C / PRS 101 / PAO1) OX=208964 GN=lppL PE=1 SV=1 && PF13627:Prokaryotic lipoprotein-attachment site	-	NOT_CHANGE
PA5275	235.597	279.647	326.009	200.098	188.833	261.682	280.417	216.871	0.371527	0.110688	0.295838	PA5275	NC_002516.2	5940747	5941082	-	336	protein_coding	frataxin-like protein&&sp|Q9HTS5|CYAY_PSEAE Iron-sulfur cluster assembly protein CyaY OS=Pseudomonas aeruginosa (strain ATCC 15692 / DSM 22644 / CIP 104116 / JCM 14847 / LMG 12228 / 1C / PRS 101 / PAO1) OX=208964 GN=cyaY PE=3 SV=2 && PF01491:Frataxin-like domain	Frataxin_Cyay	NOT_CHANGE
PA5274	1590.03	1353.26	1615.55	1058.34	1127.28	895.395	1519.61	1027	0.564955	0.00159186	0.018647	rnk	NC_002516.2	5940020	5940424	-	405	protein_coding	nucleoside diphosphate kinase regulator&&sp|P0AFW6|RNK_ECO57 Regulator of nucleoside diphosphate kinase OS=Escherichia coli O157:H7 OX=83334 GN=rnk PE=3 SV=1 && PF14760:Rnk N-terminus|PF01272:Transcription elongation factor, GreA/GreB, C-term	-	NOT_CHANGE
PA5273	212.924	176.979	185.256	197.253	231.75	184.964	191.72	204.656	-0.0948365	0.640617	0.80583	PA5273	NC_002516.2	5939263	5939976	+	714	protein_coding	hypothetical protein&&-- && -	-	NOT_CHANGE
PA5272	1605.8	1488.19	1345.43	1350.42	1080.55	1558.53	1479.81	1329.83	0.154417	0.446231	0.664831	cyaA	NC_002516.2	5936370	5939222	+	2853	protein_coding	adenylate cyclase&&sp|Q59685|CYAA_PROMI Adenylate cyclase OS=Proteus mirabilis OX=584 GN=cya PE=3 SV=1 && PF12633:Adenylate cyclase NT domain|PF01295:Adenylate cyclase, class-I	-	NOT_CHANGE
PA5271	880.285	917.163	874.531	1223.35	891.713	786.098	890.659	967.052	-0.118987	0.585848	0.768017	PA5271	NC_002516.2	5935988	5936221	+	234	protein_coding	hypothetical protein&&-- && PF06146:Phosphate-starvation-inducible E	-	NOT_CHANGE
PA5270	1256.85	1337.61	1305.07	1061.18	1054.8	1085.61	1299.84	1067.2	0.284568	0.0350896	0.148395	PA5270	NC_002516.2	5935064	5935945	+	882	protein_coding	hypothetical protein&&-- && PF00497:Bacterial extracellular solute-binding proteins, family 3	-	NOT_CHANGE
PA5269	1177.98	1366.94	1274.02	1591.3	1371.43	1202.27	1272.98	1388.33	-0.125331	0.490338	0.700281	PA5269	NC_002516.2	5934770	5935045	+	276	protein_coding	hypothetical protein&&-- && -	-	NOT_CHANGE
PA5268	636.802	493.782	519.544	633.485	575.083	529.67	550.042	579.413	-0.0752694	0.69053	0.836971	corA	NC_002516.2	5933688	5934668	-	981	protein_coding	magnesium/cobalt transporter&&sp|P0ABI6|CORA_ECO57 Magnesium transport protein CorA OS=Escherichia coli O157:H7 OX=83334 GN=corA PE=3 SV=1 && PF01544:CorA-like Mg2+ transporter protein	-	NOT_CHANGE
PA5267	22.6725	19.5557	11.3844	26.5533	23.8426	19.9677	17.8709	23.4545	-0.391109	0.349008	0.579141	hcpB	NC_002516.2	5932877	5933395	-	519	protein_coding	secreted protein Hcp&&sp|Q9HI36|MAJE_PSEAE Major exported protein OS=Pseudomonas aeruginosa (strain ATCC 15692 / DSM 22644 / CIP 104116 / JCM 14847 / LMG 12228 / 1C / PRS 101 / PAO1) OX=208964 GN=hcpA PE=1 SV=1 && PF05638:Type VI secretion system effector, Hcp	-	NOT_CHANGE
PA5266	54.2169	32.2669	49.6775	69.2282	52.4537	106.144	45.3871	75.942	-0.74061	0.0407128	0.162542	PA5266	NC_002516.2	5930602	5932677	-	2076	protein_coding	hypothetical protein&&sp|Q9HYC3|VGR4B_PSEAE Type VI secretion system spike protein VgrG4b OS=Pseudomonas aeruginosa (strain ATCC 15692 / DSM 22644 / CIP 104116 / JCM 14847 / LMG 12228 / 1C / PRS 101 / PAO1) OX=208964 GN=vgrG4b PE=3 SV=1 && PF05954:Phage late control gene D protein (GPD)	-	NOT_CHANGE
PA5265	407.119	447.826	433.643	518.737	499.741	452.952	429.529	490.477	-0.191841	0.234998	0.464977	PA5265	NC_002516.2	5927336	5930605	-	3270	protein_coding	hypothetical protein&&-- && -	-	NOT_CHANGE
PA5264	586.528	539.738	549.557	623.053	525.491	434.035	558.608	527.526	0.0820302	0.680674	0.831494	PA5264	NC_002516.2	5926134	5927105	-	972	protein_coding	hypothetical protein&&-- && -	-	NOT_CHANGE
PA5263	1859.15	1684.72	1644.53	1272.66	1350.44	1604.77	1729.47	1409.29	0.295611	0.0839904	0.249998	argH	NC_002516.2	5924596	5925990	+	1395	protein_coding	argininosuccinate lyase&&sp|P50987|ARLY_PSEAE Argininosuccinate lyase OS=Pseudomonas aeruginosa (strain ATCC 15692 / DSM 22644 / CIP 104116 / JCM 14847 / LMG 12228 / 1C / PRS 101 / PAO1) OX=208964 GN=argH PE=3 SV=2 && PF14698:Argininosuccinate lyase C-terminal|PF00206:Lyase	-	NOT_CHANGE
PA5262	855.641	997.341	892.125	1290.68	1050.98	1164.43	915.036	1168.7	-0.352971	0.037711	0.155497	algZ	NC_002516.2	5923295	5924371	-	1077	protein_coding	alginate biosynthesis protein AlgZ/FimS&&sp|P0AA94|YPDA_ECO57 Sensor histidine kinase YpdA OS=Escherichia coli O157:H7 OX=83334 GN=ypdA PE=3 SV=1 && PF06580:Histidine kinase	His_kinase	NOT_CHANGE
PA5261	2247.54	2667.4	2739.51	4030.41	3016.56	2992.01	2551.48	3346.33	-0.391321	0.0514077	0.185534	algR	NC_002516.2	5922544	5923290	-	747	protein_coding	alginate biosynthesis regulatory protein AlgR&&sp|P26275|ALGR_PSEAE Positive alginate biosynthesis regulatory protein OS=Pseudomonas aeruginosa (strain ATCC 15692 / DSM 22644 / CIP 104116 / JCM 14847 / LMG 12228 / 1C / PRS 101 / PAO1) OX=208964 GN=algR PE=3 SV=1 && PF00072:Response regulator receiver domain|PF04397:LytTr DNA-binding domain	Response_reg	NOT_CHANGE
PA5260	3044.03	3402.69	3284.92	2505.49	2673.23	3195.89	3243.88	2791.54	0.216782	0.201775	0.425675	hemC	NC_002516.2	5921494	5922435	-	942	protein_coding	porphobilinogen deaminase&&sp|B7V5F0|HEM3_PSEA8 Porphobilinogen deaminase OS=Pseudomonas aeruginosa (strain LESB58) OX=557722 GN=hemC PE=3 SV=1 && PF03900:Porphobilinogen deaminase, C-terminal domain|PF01379:Porphobilinogen deaminase, dipyromethane cofactor binding domain	-	NOT_CHANGE
PA5259	923.658	855.562	894.195	784.27	867.87	844.95	891.138	832.363	0.0984858	0.500388	0.707038	hemD	NC_002516.2	5920742	5921497	-	756	protein_coding	uroporphyrinogen-III synthase&&sp|P48246|HEM4_PSEAE Uroporphyrinogen-III synthase OS=Pseudomonas aeruginosa (strain ATCC 15692 / DSM 22644 / CIP 104116 / JCM 14847 / LMG 12228 / 1C / PRS 101 / PAO1) OX=208964 GN=hemD PE=1 SV=2 && PF02602:Uroporphyrinogen-III synthase HemD	HEM4	NOT_CHANGE
PA5258	2718.73	2719.22	2629.8	2583.25	2189.7	2595.8	2689.25	2456.25	0.13082	0.38714	0.612653	PA5258	NC_002516.2	5919585	5920715	-	1131	protein_coding	hypothetical protein&&-- && PF04375:HemX, putative uroporphyrinogen-III C-methyltransferase	-	NOT_CHANGE
PA5257	2662.54	2098.33	2130.96	1868.21	1739.56	2112.37	2297.28	1906.71	0.268969	0.144172	0.348063	PA5257	NC_002516.2	5918350	5919588	-	1239	protein_coding	hypothetical protein&&-- && PF07219:HemY protein N-terminus	HemY_N	NOT_CHANGE
PA5256	229.682	172.09	194.57	162.165	180.25	191.27	198.781	177.895	0.160805	0.444203	0.662806	dsbH	NC_002516.2	5917680	5918171	-	492	protein_coding	disulfide bond formation protein&&sp|P21482|DSBB1_PSEAE Disulfide bond formation protein B 1 OS=Pseudomonas aeruginosa (strain ATCC 15692 / DSM 22644 / CIP 104116 / JCM 14847 / LMG 12228 / 1C / PRS 101 / PAO1) OX=208964 GN=dsbB1 PE=3 SV=2 && PF02600:Disulfide bond formation protein DsbB	DsbB	NOT_CHANGE
PA5255	3961.77	4062.7	4216.38	4708.46	4001.74	3703.49	4080.28	4137.9	-0.0203045	0.901259	0.951254	algQ	NC_002516.2	5916918	5917400	-	483	protein_coding	anti-RNA polymerase sigma 70 factor&&sp|P15275|ALGQ_PSEAE Transcriptional regulatory protein AlgQ OS=Pseudomonas aeruginosa (strain ATCC 15692 / DSM 22644 / CIP 104116 / JCM 14847 / LMG 12228 / 1C / PRS 101 / PAO1) OX=208964 GN=algQ PE=3 SV=1 && PF04353:Regulator of RNA polymerase sigma(70) subunit, Rsd/AlgQ	Rsd_AlgQ	NOT_CHANGE
PA5254	157.722	191.646	200.78	220.961	209.815	168.149	183.383	199.642	-0.124007	0.569072	0.755841	PA5254	NC_002516.2	5916227	5916856	+	630	protein_coding	FkbP-type peptidyl-prolyl cis-trans isomerase&&sp|P30417|FKBZ_PSEAE Probable FKBP-type 25 kDa peptidyl-prolyl cis-trans isomerase OS=Pseudomonas aeruginosa (strain ATCC 15692 / DSM 22644 / CIP 104116 / JCM 14847 / LMG 12228 / 1C / PRS 101 / PAO1) OX=208964 GN=fkl PE=3 SV=2 && PF01346:Domain amino terminal to FKBP-type peptidyl-prolyl isomerase|PF00254:FKBP-type peptidyl-prolyl cis-trans isomerase	FKBP_C	NOT_CHANGE
PA5253	12173.2	13401.5	13410.9	14625.2	11246.1	12300.1	12995.2	12723.8	0.0304395	0.858998	0.930952	algP	NC_002516.2	5915043	5916101	-	1059	protein_coding	alginate regulatory protein AlgP&&sp|P15276|ALGP_PSEAE Transcriptional regulatory protein AlgP OS=Pseudomonas aeruginosa (strain ATCC 15692 / DSM 22644 / CIP 104116 / JCM 14847 / LMG 12228 / 1C / PRS 101 / PAO1) OX=208964 GN=algP PE=4 SV=2 && -	-	NOT_CHANGE
PA5252a	789.595	1146.94	1055.65	919.881	968.963	930.075	997.395	939.64	0.086013	0.66722	0.8233	PA5252a	NC_002516.2	5914594	5915046	+	453	protein_coding	hypothetical protein&&-- && PF09523:Protein of unknown function (DUF2390)	-	NOT_CHANGE
PA5252	2037.57	1662.24	1693.17	932.209	1614.62	1720.38	1797.66	1422.4	0.337944	0.211561	0.438259	PA5252	NC_002516.2	5912605	5914521	-	1917	protein_coding	ABC transporter ATP-binding protein&&sp|P63390|YHES_ECO57 Probable ATP-binding protein YheS OS=Escherichia coli O157:H7 OX=83334 GN=yheS PE=3 SV=1 && PF00005:ABC transporter|PF12848:ABC transporter	ABC_tran	NOT_CHANGE
PA5251	317.415	285.513	242.178	206.736	361.454	293.21	281.702	287.133	-0.0271912	0.917605	0.959894	PA5251	NC_002516.2	5912027	5912605	-	579	protein_coding	hypothetical protein&&-- && PF00924:Mechanosensitive ion channel	-	NOT_CHANGE
PA5250	554.983	615.027	568.186	357.521	692.389	457.156	579.399	502.355	0.205744	0.450478	0.667325	PA5250	NC_002516.2	5911262	5912020	-	759	protein_coding	hypothetical protein&&sp|P43932|Y056_HAEIN UPF0053 protein HI_0056 OS=Haemophilus influenzae (strain ATCC 51907 / DSM 11121 / KW20 / Rd) OX=71421 GN=HI_0056 PE=3 SV=1 && PF03741:Integral membrane protein TerC family	-	NOT_CHANGE
PA5249	306.572	408.714	436.748	432.439	384.342	376.234	384.011	397.672	-0.0508962	0.807548	0.905271	PA5249	NC_002516.2	5910403	5911032	-	630	protein_coding	hypothetical protein&&sp|Q9KVK7|Y136_VIBCH Uncharacterized membrane protein VC_0136 OS=Vibrio cholerae serotype O1 (strain ATCC 39315 / El Tor Inaba N16961) OX=243277 GN=VC_0136 PE=3 SV=1 && PF01810:LysE type translocator	-	NOT_CHANGE
PA5248	223.768	308.002	260.807	176.39	249.87	222.798	264.192	216.353	0.288516	0.21512	0.442842	PA5248	NC_002516.2	5908397	5910298	-	1902	protein_coding	hypothetical protein&&sp|P39595|EFEU_BACSU Ferrous iron permease EfeU OS=Bacillus subtilis (strain 168) OX=224308 GN=efeU PE=1 SV=2 && PF13442:Cytochrome C oxidase, cbb3-type, subunit III|PF03239:Iron permease FTR1 family	-	NOT_CHANGE
PA5247	321.358	415.559	383.966	362.262	429.167	390.947	373.628	394.125	-0.0770924	0.685798	0.834514	PA5247	NC_002516.2	5907848	5908330	-	483	protein_coding	hypothetical protein&&sp|Q9HTU7|Y5247_PSEAE UPF0178 protein PA5247 OS=Pseudomonas aeruginosa (strain ATCC 15692 / DSM 22644 / CIP 104116 / JCM 14847 / LMG 12228 / 1C / PRS 101 / PAO1) OX=208964 GN=PA5247 PE=3 SV=1 && PF02639:Uncharacterized BCR, YaiI/YqxD family COG1671	DUF188	NOT_CHANGE
PA5246	271.084	208.268	250.457	230.444	268.944	211.237	243.27	236.875	0.0376041	0.857458	0.930189	PA5246	NC_002516.2	5907390	5907863	+	474	protein_coding	hypothetical protein&&sp|P0ADP3|YIGI_ECOL6 Uncharacterized protein YigI OS=Escherichia coli O6:H1 (strain CFT073 / ATCC 700928 / UPEC) OX=199310 GN=yigI PE=4 SV=1 && PF03061:Thioesterase superfamily	4HBT	NOT_CHANGE
PA5245	1887.73	2010.33	2047.13	3411.15	2310.82	2324.66	1981.73	2682.21	-0.436752	0.0428009	0.168329	PA5245	NC_002516.2	5906626	5907294	+	669	protein_coding	glutamine amidotransferase&&sp|P0ABU5|ELBB_ECOLI Glyoxalase ElbB OS=Escherichia coli (strain K12) OX=83333 GN=elbB PE=1 SV=1 && PF01965:DJ-1/PfpI family	DJ-1_PfpI	NOT_CHANGE
PA5244	990.69	851.651	922.139	650.555	928.907	686.259	921.493	755.24	0.286861	0.166938	0.379922	PA5244	NC_002516.2	5905871	5906461	+	591	protein_coding	hypothetical protein&&sp|P33366|YOHD_ECOLI Inner membrane protein YohD OS=Escherichia coli (strain K12) OX=83333 GN=yohD PE=1 SV=1 && PF09335:SNARE associated Golgi protein	-	NOT_CHANGE
PA5243	10297.3	9475.72	9025.78	6225.79	6159.02	9355.4	9599.59	7246.74	0.405697	0.0706019	0.223761	hemB	NC_002516.2	5904614	5905627	-	1014	protein_coding	delta-aminolevulinic acid dehydratase&&sp|Q59643|HEM2_PSEAE Delta-aminolevulinic acid dehydratase OS=Pseudomonas aeruginosa (strain ATCC 15692 / DSM 22644 / CIP 104116 / JCM 14847 / LMG 12228 / 1C / PRS 101 / PAO1) OX=208964 GN=hemB PE=1 SV=1 && PF00490:Delta-aminolevulinic acid dehydratase	-	NOT_CHANGE
PA5242	13562.1	10597.2	9934.47	6973.08	8643.41	9751.6	11364.6	8456.03	0.426528	0.0490356	0.180837	ppk	NC_002516.2	5902386	5904596	-	2211	protein_coding	polyphosphate kinase&&sp|P0DP44|PPK1_PSEAE Polyphosphate kinase OS=Pseudomonas aeruginosa (strain ATCC 15692 / DSM 22644 / CIP 104116 / JCM 14847 / LMG 12228 / 1C / PRS 101 / PAO1) OX=208964 GN=ppk PE=1 SV=1 && PF13090:Polyphosphate kinase C-terminal domain 2|PF17941:Polyphosphate kinase C-terminal domain 1|PF02503:Polyphosphate kinase middle domain|PF13089:Polyphosphate kinase N-terminal domain	-	NOT_CHANGE
PA5241	2765.06	2418.06	2411.43	2321.51	2432.9	2462.34	2531.52	2405.58	0.0736728	0.613702	0.788135	ppx	NC_002516.2	5900879	5902399	+	1521	protein_coding	exopolyphosphatase&&sp|Q9ZN70|PPX_PSEAE Exopolyphosphatase OS=Pseudomonas aeruginosa (strain ATCC 15692 / DSM 22644 / CIP 104116 / JCM 14847 / LMG 12228 / 1C / PRS 101 / PAO1) OX=208964 GN=ppx PE=1 SV=1 && PF02541:Ppx/GppA phosphatase family	-	NOT_CHANGE
PA5240	5407.89	5410.09	5583.54	4844.07	4439.49	4105.99	5467.17	4463.19	0.292655	0.0421629	0.166583	trxA	NC_002516.2	5900369	5900695	-	327	protein_coding	thioredoxin&&sp|Q9X2T1|THIO_PSEAE Thioredoxin OS=Pseudomonas aeruginosa (strain ATCC 15692 / DSM 22644 / CIP 104116 / JCM 14847 / LMG 12228 / 1C / PRS 101 / PAO1) OX=208964 GN=trxA PE=3 SV=1 && PF00085:Thioredoxin	-	NOT_CHANGE
PA5239	8628.37	7014.63	7617.22	4959.77	7595.29	7292.42	7753.41	6615.83	0.228931	0.307909	0.541374	rho	NC_002516.2	5898865	5900124	-	1260	protein_coding	transcription termination factor Rho&&sp|Q9HTV1|RHO_PSEAE Transcription termination factor Rho OS=Pseudomonas aeruginosa (strain ATCC 15692 / DSM 22644 / CIP 104116 / JCM 14847 / LMG 12228 / 1C / PRS 101 / PAO1) OX=208964 GN=rho PE=3 SV=1 && PF07498:Rho termination factor, N-terminal domain|PF00006:ATP synthase alpha/beta family, nucleotide-binding domain|PF07497:Rho termination factor, RNA-bindi…	ATP-synt_ab	NOT_CHANGE
PA5238	119.277	107.556	108.67	112.851	146.87	114.552	111.834	124.758	-0.15843	0.481546	0.694462	PA5238	NC_002516.2	5896806	5898794	-	1989	protein_coding	O-antigen acetylase&&sp|O05402|YRHL_BACSU Putative peptidoglycan O-acetyltransferase YrhL OS=Bacillus subtilis (strain 168) OX=224308 GN=yrhL PE=3 SV=1 && PF01757:Acyltransferase family	-	NOT_CHANGE
PA5237	3475.79	2817	2713.63	2081.59	2621.73	2563.22	3002.14	2422.18	0.309759	0.106687	0.289508	PA5237	NC_002516.2	5895261	5896727	-	1467	protein_coding	3-octaprenyl-4-hydroxybenzoate carboxy-lyase&&sp|B7V5C7|UBID_PSEA8 3-octaprenyl-4-hydroxybenzoate carboxy-lyase OS=Pseudomonas aeruginosa (strain LESB58) OX=557722 GN=ubiD PE=3 SV=1 && PF01977:3-octaprenyl-4-hydroxybenzoate carboxy-lyase	-	NOT_CHANGE
PA5236	1184.88	943.563	899.37	440.974	792.528	697.819	1009.27	643.774	0.648877	0.0152119	0.0875893	PA5236	NC_002516.2	5894293	5895261	-	969	protein_coding	CDP-6-deoxy-delta-3%2C4-glucoseen reductase&&sp|P24273|LUXG_ALIFS Probable flavin reductase OS=Aliivibrio fischeri OX=668 GN=luxG PE=3 SV=1 && PF00175:Oxidoreductase NAD-binding domain|PF00111:2Fe-2S iron-sulfur cluster binding domain	NAD_binding_1	NOT_CHANGE
PA5235	338.116	406.759	395.35	509.254	422.491	662.088	380.075	531.277	-0.48265	0.0361193	0.150995	glpT	NC_002516.2	5892910	5894256	+	1347	protein_coding	sn-glycerol-3-phosphate transporter&&sp|P08194|GLPT_ECOLI Glycerol-3-phosphate transporter OS=Escherichia coli (strain K12) OX=83333 GN=glpT PE=1 SV=1 && PF07690:Major Facilitator Superfamily	MFS_1	NOT_CHANGE
PA5234	945.345	948.452	921.104	974.884	571.268	1126.6	938.3	890.917	0.0750205	0.783223	0.890151	PA5234	NC_002516.2	5891683	5892660	+	978	protein_coding	oxidoreductase&&sp|A7RK30|QORL2_NEMVE Quinone oxidoreductase-like protein 2 homolog OS=Nematostella vectensis OX=45351 GN=v1g238856 PE=3 SV=1 && PF00107:Zinc-binding dehydrogenase|PF08240:Alcohol dehydrogenase GroES-like domain	ADH_zinc_N	NOT_CHANGE
PA5233	459.365	475.204	511.264	628.743	517.861	522.314	481.944	556.306	-0.207419	0.232579	0.461684	PA5233	NC_002516.2	5891109	5891528	-	420	protein_coding	flagellar basal body protein FliL&&-- && PF03748:Flagellar basal body-associated protein FliL	-	NOT_CHANGE
PA5232	15125.5	18145.7	16421.5	14361.5	20639.1	19012.4	16564.3	18004.3	-0.120265	0.55248	0.743595	PA5232	NC_002516.2	5889829	5890902	-	1074	protein_coding	hypothetical protein&&sp|P37626|YHII_ECOLI Uncharacterized protein YhiI OS=Escherichia coli (strain K12) OX=83333 GN=yhiI PE=3 SV=1 && PF13437:HlyD family secretion protein|PF13533:Biotin-lipoyl like	-	NOT_CHANGE
PA5231	17945.8	15741.4	14964.3	14186.1	15389	18934.7	16217.2	16169.9	0.00423431	0.981941	0.991957	PA5231	NC_002516.2	5887082	5889832	-	2751	protein_coding	ABC transporter ATP-binding protein/permease&&sp|P37624|RBBA_ECOLI Ribosome-associated ATPase OS=Escherichia coli (strain K12) OX=83333 GN=rbbA PE=1 SV=3 && PF00005:ABC transporter|PF12698:ABC-2 family transporter protein	ABC_tran	NOT_CHANGE
PA5230	4993.87	2958.78	2914.41	2810.85	2484.4	3872.69	3622.35	3055.98	0.245377	0.400907	0.625355	PA5230	NC_002516.2	5885954	5887078	-	1125	protein_coding	ABC transporter permease&&sp|P0AGH1|YHHJ_ECOLI Inner membrane transport permease YhhJ OS=Escherichia coli (strain K12) OX=83333 GN=yhhJ PE=1 SV=3 && PF12698:ABC-2 family transporter protein	-	NOT_CHANGE
PA5229	527.382	676.628	569.221	466.579	519.768	547.536	591.077	511.294	0.20957	0.256701	0.487806	PA5229	NC_002516.2	5885486	5885944	+	459	protein_coding	hypothetical protein&&sp|Q9P016|THYN1_HUMAN Thymocyte nuclear protein 1 OS=Homo sapiens OX=9606 GN=THYN1 PE=1 SV=1 && PF01878:EVE domain	-	NOT_CHANGE
PA5228	824.096	940.63	972.851	659.09	884.083	759.824	912.526	767.666	0.24932	0.18828	0.40794	PA5228	NC_002516.2	5884508	5885119	+	612	protein_coding	5-formyltetrahydrofolate cyclo-ligase&&sp|P0AC29|5FCL_ECO57 5-formyltetrahydrofolate cyclo-ligase OS=Escherichia coli O157:H7 OX=83334 GN=ygfA PE=3 SV=1 && PF01812:5-formyltetrahydrofolate cyclo-ligase family	-	NOT_CHANGE
PA5227_1	561.884	566.138	686.171	582.275	652.333	471.869	604.731	568.826	0.0876536	0.66882	0.823974	ssrS	NC_002516.2	5884320	5884502	+	183	protein_coding	6S RNA&&-- && -	-	NOT_CHANGE
PA5227	1472.73	1716.01	1674.55	1653.89	1578.38	1275.83	1621.1	1502.7	0.109191	0.546426	0.739657	PA5227	NC_002516.2	5883972	5884286	+	315	protein_coding	hypothetical protein&&sp|Q9HTW3|ZAPA_PSEAE Cell division protein ZapA OS=Pseudomonas aeruginosa (strain ATCC 15692 / DSM 22644 / CIP 104116 / JCM 14847 / LMG 12228 / 1C / PRS 101 / PAO1) OX=208964 GN=zapA PE=1 SV=1 && PF05164:Cell division protein ZapA	-	NOT_CHANGE
PA5226	805.367	917.163	961.467	986.264	981.361	690.463	894.665	886.029	0.0135677	0.949024	0.97406	PA5226	NC_002516.2	5883664	5883975	+	312	protein_coding	hypothetical protein&&-- && -	-	NOT_CHANGE
PA5225	1193.76	1047.21	1025.63	753.923	631.352	1024.66	1088.87	803.311	0.439243	0.0576101	0.199493	PA5225	NC_002516.2	5883023	5883577	-	555	protein_coding	hypothetical protein&&sp|B7V5B5|Y5619_PSEA8 UPF0149 protein PLES_56191 OS=Pseudomonas aeruginosa (strain LESB58) OX=557722 GN=PLES_56191 PE=3 SV=1 && PF03695:Uncharacterised protein family (UPF0149)	-	NOT_CHANGE
PA5224	4812.49	3965.9	3936.94	2913.27	3408.54	4119.66	4238.44	3480.49	0.284342	0.162	0.374698	pepP	NC_002516.2	5881679	5883013	-	1335	protein_coding	aminopeptidase&&sp|P15034|AMPP_ECOLI Xaa-Pro aminopeptidase OS=Escherichia coli (strain K12) OX=83333 GN=pepP PE=1 SV=2 && PF00557:Metallopeptidase family M24|PF05195:Aminopeptidase P, N-terminal domain	Peptidase_M24	NOT_CHANGE
PA5223	2943.48	2150.15	2324.49	1355.16	1857.81	2293.14	2472.71	1835.37	0.430173	0.0897157	0.262309	ubiH	NC_002516.2	5880487	5881671	-	1185	protein_coding	2-octaprenyl-6-methoxyphenyl hydroxylase&&sp|P25534|UBIH_ECOLI 2-octaprenyl-6-methoxyphenol hydroxylase OS=Escherichia coli (strain K12) OX=83333 GN=ubiH PE=1 SV=2 && PF01494:FAD binding domain	FAD_binding_3	NOT_CHANGE
PA5222	504.71	386.225	359.127	191.563	322.352	287.956	416.687	267.29	0.641013	0.0162925	0.091964	PA5222	NC_002516.2	5880000	5880482	-	483	protein_coding	hypothetical protein&&-- && PF14539:Domain of unknown function (DUF4442)	-	NOT_CHANGE
PA5221	1215.44	866.318	950.082	478.907	656.148	745.111	1010.61	626.722	0.689703	0.00471244	0.0406149	PA5221	NC_002516.2	5878754	5879971	-	1218	protein_coding	2-octaprenyl-3-methyl-6-methoxy-1%2C4-benzoquinol hydroxylase&&sp|P25535|UBII_ECOLI 2-octaprenylphenol hydroxylase OS=Escherichia coli (strain K12) OX=83333 GN=ubiI PE=1 SV=2 && PF01494:FAD binding domain	FAD_binding_3	NOT_CHANGE
PA5220	336.145	435.115	443.993	826.945	597.972	674.699	405.084	699.872	-0.789102	0.000294577	0.00514282	PA5220	NC_002516.2	5877896	5878717	+	822	protein_coding	hypothetical protein&&-- && -	-	NOT_CHANGE
PA5219	79.8466	67.4672	49.6775	72.0732	82.9722	72.5144	65.6638	75.8532	-0.206992	0.451875	0.668523	PA5219	NC_002516.2	5876664	5877857	+	1194	protein_coding	hypothetical protein&&-- && PF07690:Major Facilitator Superfamily	MFS_1	NOT_CHANGE
PA5218	284.885	302.136	351.882	471.32	461.592	364.674	312.968	432.529	-0.467726	0.019799	0.103897	PA5218	NC_002516.2	5875653	5876567	-	915	protein_coding	transcriptional regulator&&sp|P77559|YNFL_ECOLI Uncharacterized HTH-type transcriptional regulator YnfL OS=Escherichia coli (strain K12) OX=83333 GN=ynfL PE=3 SV=1 && PF03466:LysR substrate binding domain|PF00126:Bacterial regulatory helix-turn-helix protein, lysR family	LysR_substrate	NOT_CHANGE
PA5217	250.383	281.602	428.468	412.524	557.917	389.896	320.151	453.446	-0.5029	0.0700769	0.222681	PA5217	NC_002516.2	5874587	5875585	-	999	protein_coding	iron ABC transporter substrate-binding protein&&sp|Q9HTX3|P5217_PSEAE Probable binding protein component of ABC iron transporter PA5217 OS=Pseudomonas aeruginosa (strain ATCC 15692 / DSM 22644 / CIP 104116 / JCM 14847 / LMG 12228 / 1C / PRS 101 / PAO1) OX=208964 GN=PA5217 PE=1 SV=1 && PF13343:Bacterial extracellular solute-binding protein	-	NOT_CHANGE
PA5216	138.992	115.379	152.137	116.645	151.639	152.385	135.503	140.223	-0.0492319	0.832493	0.918397	PA5216	NC_002516.2	5872900	5874519	-	1620	protein_coding	iron ABC transporter substrate-binding protein&&sp|P71338|FBPB2_HAEIN Fe(3+)-transport system permease protein FbpB 2 OS=Haemophilus influenzae (strain ATCC 51907 / DSM 11121 / KW20 / Rd) OX=71421 GN=fbpB2 PE=3 SV=2 && PF00528:Binding-protein-dependent transport system inner membrane component	BPD_transp_1	NOT_CHANGE
PA5215	1403.72	1571.3	1471.7	991.006	1511.62	1480.76	1482.24	1327.8	0.158883	0.470029	0.684193	gcvT1	NC_002516.2	5871667	5872749	-	1083	protein_coding	glycine cleavage system aminomethyltransferase T&&sp|Q9HTX5|GCST_PSEAE Aminomethyltransferase OS=Pseudomonas aeruginosa (strain ATCC 15692 / DSM 22644 / CIP 104116 / JCM 14847 / LMG 12228 / 1C / PRS 101 / PAO1) OX=208964 GN=gcvT PE=3 SV=1 && PF08669:Glycine cleavage T-protein C-terminal barrel domain|PF01571:Aminomethyltransferase folate-binding domain	GCV_T	NOT_CHANGE
PA5214	1944.91	2816.02	3057.24	2002.87	2573.09	3024.58	2606.06	2533.52	0.0407755	0.872912	0.938364	gcvH1	NC_002516.2	5871231	5871620	-	390	protein_coding	glycine cleavage system protein H&&sp|Q9HTX6|GCSH2_PSEAE Glycine cleavage system H protein 2 OS=Pseudomonas aeruginosa (strain ATCC 15692 / DSM 22644 / CIP 104116 / JCM 14847 / LMG 12228 / 1C / PRS 101 / PAO1) OX=208964 GN=gcvH2 PE=3 SV=1 && PF01597:Glycine cleavage H-protein	-	NOT_CHANGE
PA5213	559.912	646.316	636.493	643.917	624.676	732.5	614.241	667.031	-0.118656	0.479155	0.692296	gcvP1	NC_002516.2	5868181	5871057	-	2877	protein_coding	glycine dehydrogenase&&sp|Q9HTX7|GCSP2_PSEAE Glycine dehydrogenase (decarboxylating) 2 OS=Pseudomonas aeruginosa (strain ATCC 15692 / DSM 22644 / CIP 104116 / JCM 14847 / LMG 12228 / 1C / PRS 101 / PAO1) OX=208964 GN=gcvP2 PE=3 SV=1 && PF02347:Glycine cleavage system P-protein	-	NOT_CHANGE
PA5212	728.477	836.007	884.881	1909.94	988.99	874.376	816.455	1257.77	-0.623623	0.0505891	0.183706	PA5212	NC_002516.2	5867817	5868146	+	330	protein_coding	hypothetical protein&&-- && PF09498:Protein of unknown function (DUF2388)	-	NOT_CHANGE
PA5211	102.519	119.29	126.264	162.165	162.13	132.418	116.024	152.237	-0.393603	0.0711807	0.224846	PA5211	NC_002516.2	5867233	5867685	+	453	protein_coding	hypothetical protein&&-- && PF01957:NfeD-like C-terminal, partner-binding	-	NOT_CHANGE
PA5210	1953.78	1607.48	1630.04	1970.63	1859.72	2146	1730.43	1992.12	-0.203049	0.225584	0.454253	PA5210	NC_002516.2	5865227	5867011	+	1785	protein_coding	secretion pathway ATPase&&sp|Q1D098|PILB_MYXXD Type IV pilus assembly ATPase PilB OS=Myxococcus xanthus (strain DK1622) OX=246197 GN=pilB PE=1 SV=1 && PF05157:Type II secretion system (T2SS), protein E, N-terminal domain|PF00437:Type II/IV secretion system protein	-	NOT_CHANGE
PA5209	510.624	457.604	487.461	355.624	465.407	571.707	485.229	464.246	0.0644211	0.776382	0.888063	PA5209	NC_002516.2	5863825	5865189	+	1365	protein_coding	hypothetical protein&&sp|P45267|3PASE_HAEIN Inorganic triphosphatase OS=Haemophilus influenzae (strain ATCC 51907 / DSM 11121 / KW20 / Rd) OX=71421 GN=HI_1598 PE=3 SV=1 && PF01928:CYTH domain	-	NOT_CHANGE
PA5208	5462.1	5912.67	5466.6	5310.65	6378.37	5290.4	5613.79	5659.81	-0.0117981	0.940659	0.970228	PA5208	NC_002516.2	5863034	5863711	-	678	protein_coding	hypothetical protein&&sp|P44271|Y1603_HAEIN UPF0111 protein HI_1603 OS=Haemophilus influenzae (strain ATCC 51907 / DSM 11121 / KW20 / Rd) OX=71421 GN=HI_1603 PE=1 SV=1 && PF01865:Protein of unknown function DUF47	-	NOT_CHANGE
PA5207	2296.82	2013.26	1927.07	1523.97	2048.56	1737.19	2079.05	1769.9	0.232273	0.21672	0.443719	PA5207	NC_002516.2	5861721	5862989	-	1269	protein_coding	phosphate transporter&&sp|P45268|Y1604_HAEIN Putative phosphate permease HI_1604 OS=Haemophilus influenzae (strain ATCC 51907 / DSM 11121 / KW20 / Rd) OX=71421 GN=HI_1604 PE=3 SV=1 && PF01384:Phosphate transporter family	-	NOT_CHANGE
PA5206	1306.13	1416.81	1303	1631.13	1365.7	1457.64	1341.98	1484.83	-0.145933	0.349067	0.579141	argE	NC_002516.2	5860467	5861621	-	1155	protein_coding	acetylornithine deacetylase&&sp|Q9K4Z2|ARGE_MORAB Acetylornithine deacetylase OS=Moritella abyssi OX=111292 GN=argE PE=1 SV=1 && PF01546:Peptidase family M20/M25/M40|PF07687:Peptidase dimerisation domain	Peptidase_M20	NOT_CHANGE
PA5205	173.494	183.824	151.102	168.803	170.713	160.793	169.473	166.77	0.0234531	0.903994	0.952797	PA5205	NC_002516.2	5859793	5860494	+	702	protein_coding	multiple drug resistance protein MarC&&sp|A1ABA8|MARC_ECOK1 UPF0056 inner membrane protein MarC OS=Escherichia coli O1:K1 / APEC OX=405955 GN=marC PE=3 SV=1 && PF01914:MarC family integral membrane protein	-	NOT_CHANGE
PA5204	732.42	662.939	728.603	722.628	764.87	759.824	707.987	749.108	-0.081468	0.581741	0.765027	argA	NC_002516.2	5858158	5859456	-	1299	protein_coding	N-acetylglutamate synthase&&sp|B7V594|ARGA_PSEA8 Amino-acid acetyltransferase OS=Pseudomonas aeruginosa (strain LESB58) OX=557722 GN=argA PE=3 SV=1 && PF00696:Amino acid kinase family|PF00583:Acetyltransferase (GNAT) family	AA_kinase	NOT_CHANGE
PA5203	1582.15	1523.39	1494.46	1597.94	1573.61	1484.97	1533.33	1552.17	-0.0176905	0.896322	0.949672	gshA	NC_002516.2	5856532	5858115	+	1584	protein_coding	glutamate--cysteine ligase&&sp|Q9HTY6|GSH1_PSEAE Glutamate--cysteine ligase OS=Pseudomonas aeruginosa (strain ATCC 15692 / DSM 22644 / CIP 104116 / JCM 14847 / LMG 12228 / 1C / PRS 101 / PAO1) OX=208964 GN=gshA PE=3 SV=1 && PF04262:Glutamate-cysteine ligase	-	NOT_CHANGE
PA5202	157.722	221.957	183.186	52.1582	231.75	152.385	187.622	145.431	0.36771	0.421732	0.644188	PA5202	NC_002516.2	5855936	5856325	+	390	protein_coding	hypothetical protein&&sp|Q8ZXD8|Y1329_PYRAE Putative esterase PAE1329 OS=Pyrobaculum aerophilum (strain ATCC 51768 / IM2 / DSM 7523 / JCM 9630 / NBRC 100827) OX=178306 GN=PAE1329 PE=3 SV=1 && PF03061:Thioesterase superfamily	4HBT	NOT_CHANGE
PA5201	1778.31	1880.28	1690.07	586.069	1574.56	1639.46	1782.89	1266.7	0.493278	0.176138	0.391147	PA5201	NC_002516.2	5853585	5855924	+	2340	protein_coding	hypothetical protein&&sp|P46837|YHGF_ECOLI Protein YhgF OS=Escherichia coli (strain K12) OX=83333 GN=yhgF PE=1 SV=3 && PF09371:Tex-like protein N-terminal domain|PF12836:Helix-hairpin-helix motif|PF00575:S1 RNA binding domain|PF16921:Tex protein YqgF-like domain|PF17674:HHH domain	S1	NOT_CHANGE
PA5200	2604.38	2255.75	2255.15	2801.37	2580.72	2443.42	2371.76	2608.5	-0.137309	0.379092	0.605547	amgR	NC_002516.2	5852653	5853396	-	744	protein_coding	osmolarity response regulator&&sp|P0AA18|OMPR_ECO57 DNA-binding dual transcriptional regulator OmpR OS=Escherichia coli O157:H7 OX=83334 GN=ompR PE=3 SV=1 && PF00072:Response regulator receiver domain|PF00486:Transcriptional regulatory protein, C terminal	Response_reg	NOT_CHANGE
PA5199	938.445	785.162	718.254	599.345	708.602	706.227	813.953	671.391	0.278076	0.140423	0.341772	amgS	NC_002516.2	5851239	5852558	-	1320	protein_coding	protein AmgS&&sp|P0AEJ4|ENVZ_ECOLI Sensor histidine kinase EnvZ OS=Escherichia coli (strain K12) OX=83333 GN=envZ PE=1 SV=1 && PF00512:His Kinase A (phospho-acceptor) domain|PF00672:HAMP domain|PF02518:Histidine kinase-, DNA gyrase B-, and HSP90-like ATPase	HATPase_c	NOT_CHANGE
PA5198	861.555	846.762	848.657	780.476	720.046	767.181	852.325	755.901	0.173268	0.220328	0.447475	PA5198	NC_002516.2	5850239	5851162	+	924	protein_coding	LD-carboxypeptidase&&sp|Q9HTZ1|LDC_PSEAE Murein tetrapeptide carboxypeptidase OS=Pseudomonas aeruginosa (strain ATCC 15692 / DSM 22644 / CIP 104116 / JCM 14847 / LMG 12228 / 1C / PRS 101 / PAO1) OX=208964 GN=PA5198 PE=1 SV=1 && PF02016:LD-carboxypeptidase N-terminal domain|PF17676:LD-carboxypeptidase C-terminal domain	-	NOT_CHANGE
PA5197	491.895	484.004	469.866	456.147	373.852	372.03	481.922	400.676	0.266002	0.126581	0.320125	rimK	NC_002516.2	5849143	5850048	+	906	protein_coding	ribosomal protein S6 modification protein&&sp|A6VDX3|RIMK_PSEA7 Probable alpha-L-glutamate ligase OS=Pseudomonas aeruginosa (strain PA7) OX=381754 GN=rimK PE=3 SV=1 && PF08443:RimK-like ATP-grasp domain|PF18030:RimK PreATP-grasp domain	-	NOT_CHANGE
PA5196	177.437	155.468	184.221	148.888	166.898	192.321	172.375	169.369	0.0262585	0.899852	0.950788	PA5196	NC_002516.2	5848577	5849011	+	435	protein_coding	hypothetical protein&&sp|Q6AKK4|RIMK_DESPS Probable alpha-L-glutamate ligase OS=Desulfotalea psychrophila (strain LSv54 / DSM 12343) OX=177439 GN=rimK PE=3 SV=1 && PF05618:Putative ATP-dependant zinc protease	-	NOT_CHANGE
PA5195	357.831	421.426	345.673	239.928	403.417	398.304	374.976	347.216	0.111554	0.665966	0.822498	PA5195	NC_002516.2	5847972	5848367	-	396	protein_coding	heat shock protein&&sp|P0ACH0|HSLR_ECO57 Heat shock protein 15 OS=Escherichia coli O157:H7 OX=83334 GN=hslR PE=3 SV=1 && PF01479:S4 domain	S4	NOT_CHANGE
PA5194	278.97	393.07	432.608	211.478	297.555	359.419	368.216	289.484	0.347614	0.212519	0.439648	PA5194	NC_002516.2	5847131	5847934	+	804	protein_coding	hypothetical protein&&-- && PF01569:PAP2 superfamily	-	NOT_CHANGE
PA5193	698.905	524.093	625.109	337.606	468.268	531.772	616.035	445.882	0.466833	0.0512477	0.18516	yrfI	NC_002516.2	5846125	5847018	-	894	protein_coding	heat shock protein 33&&sp|B7V3U0|HSLO_PSEA8 33 kDa chaperonin OS=Pseudomonas aeruginosa (strain LESB58) OX=557722 GN=hslO PE=3 SV=1 && PF01430:Hsp33 protein	-	NOT_CHANGE
PA5192	3888.83	3682.34	3599.55	1407.32	2596.93	3304.13	3723.57	2436.13	0.612204	0.0473368	0.177818	pckA	NC_002516.2	5844468	5846009	-	1542	protein_coding	phosphoenolpyruvate carboxykinase&&sp|Q9HTZ7|PCKA_PSEAE Phosphoenolpyruvate carboxykinase (ATP) OS=Pseudomonas aeruginosa (strain ATCC 15692 / DSM 22644 / CIP 104116 / JCM 14847 / LMG 12228 / 1C / PRS 101 / PAO1) OX=208964 GN=pckA PE=3 SV=1 && PF01293:Phosphoenolpyruvate carboxykinase	-	NOT_CHANGE
PA5191	145.893	193.602	183.186	350.882	216.491	198.626	174.227	255.333	-0.552259	0.0529363	0.188182	PA5191	NC_002516.2	5844054	5844410	+	357	protein_coding	hypothetical protein&&-- && -	-	NOT_CHANGE
PA5190	535.268	564.182	516.439	587.965	556.009	509.702	538.63	551.226	-0.0336003	0.832077	0.918397	PA5190	NC_002516.2	5843198	5843800	-	603	protein_coding	nitroreductase&&sp|Q55233|DRGA_SYNY3 Protein DrgA OS=Synechocystis sp. (strain PCC 6803 / Kazusa) OX=1111708 GN=drgA PE=1 SV=1 && PF00881:Nitroreductase family	Nitroreductase	NOT_CHANGE
PA5189	235.597	283.558	290.82	317.691	266.083	285.854	269.992	289.876	-0.102864	0.591677	0.772498	PA5189	NC_002516.2	5842275	5843183	+	909	protein_coding	transcriptional regulator&&sp|P10183|NAHR_PSEPU HTH-type transcriptional activator NahR OS=Pseudomonas putida OX=303 GN=nahR PE=3 SV=2 && PF00126:Bacterial regulatory helix-turn-helix protein, lysR family|PF03466:LysR substrate binding domain	LysR_substrate	NOT_CHANGE
PA5188	255.312	192.624	204.92	262.688	197.417	232.256	217.619	230.787	-0.0846463	0.701898	0.843609	PA5188	NC_002516.2	5840897	5842132	-	1236	protein_coding	3-hydroxyacyl-CoA dehydrogenase&&sp|Q6NYL3|ECHP_DANRE Peroxisomal bifunctional enzyme OS=Danio rerio OX=7955 GN=ehhadh PE=2 SV=1 && PF02737:3-hydroxyacyl-CoA dehydrogenase, NAD binding domain|PF00725:3-hydroxyacyl-CoA dehydrogenase, C-terminal domain	3HCDH_N	NOT_CHANGE
PA5187	265.17	220.98	219.409	220.961	256.546	233.307	235.186	236.938	-0.0105775	0.955983	0.978235	PA5187	NC_002516.2	5839105	5840895	-	1791	protein_coding	acyl-CoA dehydrogenase&&sp|Q5LLW7|DMDC_RUEPO 3-methylmercaptopropionyl-CoA dehydrogenase OS=Ruegeria pomeroyi (strain ATCC 700808 / DSM 15171 / DSS-3) OX=246200 GN=dmdC PE=1 SV=1 && PF02771:Acyl-CoA dehydrogenase, N-terminal domain|PF12418:Acyl-CoA dehydrogenase N terminal|PF02770:Acyl-CoA dehydrogenase, middle domain|PF00441:Acyl-CoA dehydrogenase, C-terminal domain|PF12806:Acetyl-CoA dehydrogen…	-	NOT_CHANGE
PA5186	136.035	94.8452	106.6	146.043	131.611	143.978	112.493	140.544	-0.320846	0.165377	0.378491	PA5186	NC_002516.2	5837915	5839078	-	1164	protein_coding	iron-containing alcohol dehydrogenase&&sp|A4IP64|ADH1_GEOTN Long-chain-alcohol dehydrogenase 1 OS=Geobacillus thermodenitrificans (strain NG80-2) OX=420246 GN=adh1 PE=1 SV=1 && PF00465:Iron-containing alcohol dehydrogenase	-	NOT_CHANGE
PA5185	92.6615	120.268	121.089	166.906	120.167	99.8386	111.339	128.97	-0.213971	0.438135	0.657262	PA5185	NC_002516.2	5837449	5837892	-	444	protein_coding	hypothetical protein&&sp|P11469|YSMA_BACSU Uncharacterized protein YsmA OS=Bacillus subtilis (strain 168) OX=224308 GN=ysmA PE=4 SV=1 && PF03061:Thioesterase superfamily	4HBT	NOT_CHANGE
PA5184	284.885	261.069	292.89	353.727	336.657	273.243	279.615	321.209	-0.201112	0.294204	0.526454	PA5184	NC_002516.2	5836910	5837467	+	558	protein_coding	chorismate mutase&&sp|Q9HU05|CHMU_PSEAE Monofunctional chorismate mutase OS=Pseudomonas aeruginosa (strain ATCC 15692 / DSM 22644 / CIP 104116 / JCM 14847 / LMG 12228 / 1C / PRS 101 / PAO1) OX=208964 GN=aroQ PE=1 SV=1 && PF01817:Chorismate mutase type II	-	NOT_CHANGE
PA5183a	2755.2	3358.69	3312.87	2378.41	3956.92	2644.15	3142.25	2993.16	0.0700857	0.775635	0.887768	PA5183a	NC_002516.2	5836470	5836685	-	216	protein_coding	hypothetical protein&&-- && PF02599:Global regulator protein family	-	NOT_CHANGE
PA5183	93.6473	112.445	124.194	101.471	130.657	76.7181	110.095	102.949	0.0942824	0.733642	0.867032	PA5183	NC_002516.2	5835994	5836401	+	408	protein_coding	hypothetical protein&&-- && -	-	NOT_CHANGE
PA5182	619.058	607.205	665.472	886.689	631.352	581.166	630.578	699.736	-0.150553	0.494531	0.703081	PA5182	NC_002516.2	5835380	5835895	+	516	protein_coding	hypothetical protein&&-- && -	-	NOT_CHANGE
PA5181_1	87.7327	58.6671	82.7958	71.1248	52.4537	49.3938	76.3986	57.6575	0.403471	0.170654	0.384566	PA5181_1	NC_002516.2	5835082	5835480	-	399	protein_coding	P34&&-- && -	-	NOT_CHANGE
PA5181	232.64	235.646	357.057	161.216	252.731	227.001	275.114	213.65	0.36458	0.190162	0.409735	PA5181	NC_002516.2	5832749	5835070	+	2322	protein_coding	oxidoreductase&&sp|P9WJP8|Y2900_MYCTO Uncharacterized oxidoreductase MT2968 OS=Mycobacterium tuberculosis (strain CDC 1551 / Oshkosh) OX=83331 GN=MT2968 PE=3 SV=1 && PF00384:Molybdopterin oxidoreductase	-	NOT_CHANGE
PA5180	61.1172	74.3117	67.2716	54.0549	52.4537	47.292	67.5668	51.2668	0.397019	0.126321	0.320033	PA5180	NC_002516.2	5831902	5832741	+	840	protein_coding	hypothetical protein&&sp|A9I097|FDHD_BORPD Sulfur carrier protein FdhD OS=Bordetella petrii (strain ATCC BAA-461 / DSM 12804 / CCUG 43448) OX=340100 GN=fdhD PE=3 SV=1 && PF02634:FdhD/NarQ family	-	NOT_CHANGE
PA5179	234.611	241.513	231.828	236.134	233.657	259.58	235.984	243.124	-0.0422825	0.806304	0.905271	PA5179	NC_002516.2	5830924	5831805	+	882	protein_coding	transcriptional regulator&&sp|P71318|OXYR_PECCC Hydrogen peroxide-inducible genes activator OS=Pectobacterium carotovorum subsp. carotovorum OX=555 GN=oxyR PE=3 SV=1 && PF00126:Bacterial regulatory helix-turn-helix protein, lysR family|PF03466:LysR substrate binding domain	LysR_substrate	NOT_CHANGE
PA5178	4278.2	4624.93	4725.57	12404.2	6040.76	5964.04	4542.9	8136.32	-0.840791	0.00722782	0.053772	PA5178	NC_002516.2	5830313	5830750	-	438	protein_coding	hypothetical protein&&sp|P0ADE7|KBP_ECOL6 Potassium binding protein Kbp OS=Escherichia coli O6:H1 (strain CFT073 / ATCC 700928 / UPEC) OX=199310 GN=kbp PE=3 SV=2 && PF04972:BON domain|PF01476:LysM domain	BON	NOT_CHANGE
PA5177	453.45	425.337	436.748	409.679	368.13	484.48	438.512	420.763	0.0603033	0.742389	0.870199	PA5177	NC_002516.2	5829596	5830261	+	666	protein_coding	hydrolase&&sp|P64636|YRFG_ECOLI GMP/IMP nucleotidase YrfG OS=Escherichia coli (strain K12) OX=83333 GN=yrfG PE=1 SV=1 && PF13419:Haloacid dehalogenase-like hydrolase	-	NOT_CHANGE
PA5176	863.527	880.985	893.16	903.759	878.361	1011	879.224	931.039	-0.0823641	0.581491	0.765027	PA5176	NC_002516.2	5828904	5829470	-	567	protein_coding	ADP-ribose diphosphatase NudE&&sp|P45799|NUDE_ECOLI ADP compounds hydrolase NudE OS=Escherichia coli (strain K12) OX=83333 GN=nudE PE=1 SV=1 && PF00293:NUDIX domain	NUDIX	NOT_CHANGE
PA5175	540.197	485.959	609.584	487.442	460.639	564.351	545.247	504.144	0.113286	0.543022	0.73845	cysQ	NC_002516.2	5828086	5828907	-	822	protein_coding	3'(2')%2C5'-bisphosphate nucleotidase CysQ&&sp|Q8XCG6|CYSQ_ECO57 3'(2'),5'-bisphosphate nucleotidase CysQ OS=Escherichia coli O157:H7 OX=83334 GN=cysQ PE=3 SV=1 && PF00459:Inositol monophosphatase family	-	NOT_CHANGE
PA5174	3004.6	2743.67	2784.01	1251.8	1513.53	2357.24	2844.09	1707.52	0.73628	0.00539709	0.0443408	PA5174	NC_002516.2	5826135	5828039	+	1905	protein_coding	beta-ketoacyl synthase&&sp|Q9HU15|FABY_PSEAE Beta-ketoacyl-[acyl-carrier-protein] synthase FabY OS=Pseudomonas aeruginosa (strain ATCC 15692 / DSM 22644 / CIP 104116 / JCM 14847 / LMG 12228 / 1C / PRS 101 / PAO1) OX=208964 GN=fabY PE=1 SV=1 && PF02801:Beta-ketoacyl synthase, C-terminal domain|PF00109:Beta-ketoacyl synthase, N-terminal domain	ketoacyl-synt	NOT_CHANGE
PA5173	40905.1	14518.2	14341.3	27771.9	15183.9	54750.4	23254.9	32568.7	-0.485951	0.346199	0.578112	arcC	NC_002516.2	5824787	5825719	+	933	protein_coding	carbamate kinase&&sp|P13982|ARCC_PSEAE Carbamate kinase OS=Pseudomonas aeruginosa (strain ATCC 15692 / DSM 22644 / CIP 104116 / JCM 14847 / LMG 12228 / 1C / PRS 101 / PAO1) OX=208964 GN=arcC PE=3 SV=1 && PF00696:Amino acid kinase family	AA_kinase	NOT_CHANGE
PA5172	63537.2	25595.5	23003.8	48197	28241.1	83446.2	37378.8	53294.8	-0.511769	0.278013	0.512115	arcB	NC_002516.2	5823716	5824726	+	1011	protein_coding	ornithine carbamoyltransferase&&sp|P08308|OTCC_PSEAE Ornithine carbamoyltransferase, catabolic OS=Pseudomonas aeruginosa (strain ATCC 15692 / DSM 22644 / CIP 104116 / JCM 14847 / LMG 12228 / 1C / PRS 101 / PAO1) OX=208964 GN=arcB PE=1 SV=3 && PF00185:Aspartate/ornithine carbamoyltransferase, Asp/Orn binding domain|PF02729:Aspartate/ornithine carbamoyltransferase, carbamoyl-P binding domain	-	NOT_CHANGE
PA5171	97532.2	52329.1	44492.4	74714.3	57755.3	117369	64784.6	83279.6	-0.36231	0.326838	0.559473	arcA	NC_002516.2	5822380	5823636	+	1257	protein_coding	arginine deiminase&&sp|P13981|ARCA_PSEAE Arginine deiminase OS=Pseudomonas aeruginosa (strain ATCC 15692 / DSM 22644 / CIP 104116 / JCM 14847 / LMG 12228 / 1C / PRS 101 / PAO1) OX=208964 GN=arcA PE=1 SV=2 && PF02274:Amidinotransferase	-	NOT_CHANGE
PA5170	105768	107500	96705.5	104769	104447	120947	103324	110054	-0.0910264	0.54383	0.739083	arcD	NC_002516.2	5820910	5822358	+	1449	protein_coding	arginine/ornithine antiporter&&sp|P18275|ARCD_PSEAE Arginine/ornithine antiporter OS=Pseudomonas aeruginosa (strain ATCC 15692 / DSM 22644 / CIP 104116 / JCM 14847 / LMG 12228 / 1C / PRS 101 / PAO1) OX=208964 GN=arcD PE=1 SV=1 && PF13520:Amino acid permease	-	NOT_CHANGE
PA5169	138.992	164.268	141.788	653.4	398.648	208.085	148.349	420.044	-1.50202	9.79e-05	0.00218631	PA5169	NC_002516.2	5818831	5820114	+	1284	protein_coding	C4-dicarboxylate transporter&&sp|Q9HU16|DCTM_PSEAE C4-dicarboxylate TRAP transporter large permease protein DctM OS=Pseudomonas aeruginosa (strain ATCC 15692 / DSM 22644 / CIP 104116 / JCM 14847 / LMG 12228 / 1C / PRS 101 / PAO1) OX=208964 GN=dctM PE=1 SV=1 && PF06808:Tripartite ATP-independent periplasmic transporter, DctM component	-	DOWN
PA5168	193.209	193.602	219.409	1040.32	644.704	388.845	202.073	691.289	-1.7749	3.47e-07	1.82e-05	PA5168	NC_002516.2	5818202	5818834	+	633	protein_coding	dicarboxylate transporter&&sp|Q9HU17|DCTQ_PSEAE C4-dicarboxylate TRAP transporter small permease protein DctQ OS=Pseudomonas aeruginosa (strain ATCC 15692 / DSM 22644 / CIP 104116 / JCM 14847 / LMG 12228 / 1C / PRS 101 / PAO1) OX=208964 GN=dctQ PE=1 SV=1 && PF04290:Tripartite ATP-independent periplasmic transporters, DctQ component	-	DOWN
PA5167	1135.6	1391.39	1188.12	8699.99	3811.95	2287.88	1238.37	4933.27	-1.99414	3.21e-06	0.000126777	PA5167	NC_002516.2	5817191	5818186	+	996	protein_coding	C4-dicarboxylate-binding protein&&sp|Q9HU18|DCTP_PSEAE C4-dicarboxylate-binding periplasmic protein DctP OS=Pseudomonas aeruginosa (strain ATCC 15692 / DSM 22644 / CIP 104116 / JCM 14847 / LMG 12228 / 1C / PRS 101 / PAO1) OX=208964 GN=dctP PE=1 SV=1 && PF03480:Bacterial extracellular solute-binding protein, family 7	-	DOWN
PA5166	1142.5	991.474	922.139	692.282	851.657	908.006	1018.7	817.315	0.318104	0.0980623	0.277519	PA5166	NC_002516.2	5815562	5816950	+	1389	protein_coding	two-component response regulator&&sp|Q9HU19|DCTD_PSEAE C4-dicarboxylate transport transcriptional regulatory protein DctD OS=Pseudomonas aeruginosa (strain ATCC 15692 / DSM 22644 / CIP 104116 / JCM 14847 / LMG 12228 / 1C / PRS 101 / PAO1) OX=208964 GN=dctD PE=3 SV=1 && PF00158:Sigma-54 interaction domain|PF00072:Response regulator receiver domain|PF02954:Bacterial regulatory protein, Fis family	Sigma54_activat	NOT_CHANGE
PA5165	941.402	882.94	848.657	715.99	875.5	775.588	891	789.026	0.175379	0.286411	0.519507	PA5165	NC_002516.2	5813727	5815565	+	1839	protein_coding	two-component sensor&&sp|Q9HU20|DCTB_PSEAE C4-dicarboxylate transport sensor protein DctB OS=Pseudomonas aeruginosa (strain ATCC 15692 / DSM 22644 / CIP 104116 / JCM 14847 / LMG 12228 / 1C / PRS 101 / PAO1) OX=208964 GN=dctB PE=3 SV=1 && PF02518:Histidine kinase-, DNA gyrase B-, and HSP90-like ATPase|PF00512:His Kinase A (phospho-acceptor) domain|PF02743:Cache domain	HATPase_c	NOT_CHANGE
PA5164	1703.4	1709.17	1538.97	1114.29	1567.89	1592.16	1650.51	1424.78	0.21235	0.297384	0.529994	rmlC	NC_002516.2	5813122	5813667	+	546	protein_coding	dTDP-4-dehydrorhamnose 3%2C5-epimerase&&sp|Q9HU21|RMLC_PSEAE dTDP-4-dehydrorhamnose 3,5-epimerase OS=Pseudomonas aeruginosa (strain ATCC 15692 / DSM 22644 / CIP 104116 / JCM 14847 / LMG 12228 / 1C / PRS 101 / PAO1) OX=208964 GN=rmlC PE=1 SV=1 && PF00908:dTDP-4-dehydrorhamnose 3,5-epimerase	-	NOT_CHANGE
PA5163	2756.19	2449.35	2237.56	1576.13	2526.36	2369.85	2481.03	2157.45	0.201701	0.389574	0.614677	rmlA	NC_002516.2	5812241	5813122	+	882	protein_coding	glucose-1-phosphate thymidylyltransferase&&sp|P55254|RMLA_SALAN Glucose-1-phosphate thymidylyltransferase OS=Salmonella anatum OX=58712 GN=rmlA PE=3 SV=1 && PF00483:Nucleotidyl transferase	-	NOT_CHANGE
PA5162	1661.01	1155.74	1254.36	752.026	1178.78	1240.1	1357.04	1056.97	0.36071	0.172172	0.38657	rmlD	NC_002516.2	5811336	5812244	+	909	protein_coding	dTDP-4-dehydrorhamnose reductase&&sp|P37760|RMLD_ECOLI dTDP-4-dehydrorhamnose reductase OS=Escherichia coli (strain K12) OX=83333 GN=rfbD PE=3 SV=2 && PF04321:RmlD substrate binding domain	-	NOT_CHANGE
PA5161	3290.47	2706.51	2687.76	2118.57	2479.63	2710.36	2894.91	2436.19	0.24901	0.17817	0.394029	rmlB	NC_002516.2	5810281	5811339	+	1059	protein_coding	dTDP-D-glucose 4%2C6-dehydratase&&sp|P0C7J0|RMLB_XANCP dTDP-glucose 4,6-dehydratase OS=Xanthomonas campestris pv. campestris (strain ATCC 33913 / DSM 3586 / NCPPB 528 / LMG 568 / P 25) OX=190485 GN=rfbB PE=3 SV=1 && PF16363:GDP-mannose 4,6 dehydratase	-	NOT_CHANGE
PA5160_1	6.90033	3.91114	0	1.89666	0.953703	0	3.60382	0.950122	1.90276	0.189663	1	PA5160_1	NC_002516.2	5809970	5810045	+	76	protein_coding	tRNA-Thr&&-- && -	-	NOT_CHANGE
PA5160	177.437	163.29	172.836	66.3832	88.6944	63.056	171.188	72.7112	1.23337	1.14e-07	6.89e-06	PA5160	NC_002516.2	5808368	5809897	+	1530	protein_coding	drug efflux transporter&&sp|P0AEJ1|EMRB_ECO57 Multidrug export protein EmrB OS=Escherichia coli O157:H7 OX=83334 GN=emrB PE=3 SV=1 && PF07690:Major Facilitator Superfamily	MFS_1	UP
PA5159	127.163	196.535	210.094	66.3832	96.324	87.2274	177.931	83.3115	1.09486	0.00013442	0.00283793	PA5159	NC_002516.2	5807173	5808357	+	1185	protein_coding	multidrug resistance protein&&sp|P44928|EMRA_HAEIN Multidrug export protein EmrA OS=Haemophilus influenzae (strain ATCC 51907 / DSM 11121 / KW20 / Rd) OX=71421 GN=emrA PE=3 SV=1 && PF00529:HlyD membrane-fusion protein of T1SS|PF16576:Barrel-sandwich domain of CusB or HlyD membrane-fusion	HlyD	UP
PA5158	96.6046	138.846	126.264	96.7298	60.0833	71.4634	120.571	76.0922	0.663214	0.0190943	0.101768	PA5158	NC_002516.2	5805680	5807158	+	1479	protein_coding	hypothetical protein&&sp|P24126|FUSA_BURCE Fusaric acid resistance protein FusA OS=Burkholderia cepacia OX=292 GN=fusA PE=3 SV=2 && PF02321:Outer membrane efflux protein	OEP	NOT_CHANGE
PA5157	60.1314	85.0673	78.656	58.7965	63.8981	48.3429	74.6183	57.0125	0.385863	0.161125	0.373944	PA5157	NC_002516.2	5805206	5805676	+	471	protein_coding	transcriptional regulator&&-- && PF01047:MarR family	MarR	NOT_CHANGE
PA5156	130.12	124.179	160.417	95.7814	124.935	117.704	138.239	112.807	0.293053	0.208173	0.434012	PA5156	NC_002516.2	5803582	5804802	+	1221	protein_coding	hypothetical protein&&sp|Q6AYG0|RRNAD_RAT Protein RRNAD1 OS=Rattus norvegicus OX=10116 GN=Rrnad1 PE=2 SV=1 && PF13679:Methyltransferase domain	-	NOT_CHANGE
PA5155	187.295	220.002	216.304	221.909	254.639	184.964	207.867	220.504	-0.0863124	0.68375	0.833755	PA5155	NC_002516.2	5802821	5803513	+	693	protein_coding	amino acid ABC transporter permease&&sp|P35114|OCCM_RHIRD Octopine transport system permease protein OccM OS=Rhizobium radiobacter OX=358 GN=occM PE=2 SV=2 && PF00528:Binding-protein-dependent transport system inner membrane component	BPD_transp_1	NOT_CHANGE
PA5154	417.963	656.094	609.584	674.263	647.565	481.327	561.214	601.052	-0.0993454	0.692612	0.83781	PA5154	NC_002516.2	5802129	5802824	+	696	protein_coding	ABC transporter permease&&sp|P72295|OCCQ_RHIML Octopine transport system permease protein OccQ OS=Rhizobium meliloti OX=382 GN=occQ PE=3 SV=1 && PF00528:Binding-protein-dependent transport system inner membrane component	BPD_transp_1	NOT_CHANGE
PA5153	4563.09	7263.97	6950.71	11477.6	8705.41	7197.84	6259.26	9126.96	-0.544173	0.0431413	0.168858	PA5153	NC_002516.2	5801315	5802067	+	753	protein_coding	amino acid ABC transporter substrate-binding protein&&sp|P02910|HISJ_SALTY Histidine-binding periplasmic protein OS=Salmonella typhimurium (strain LT2 / SGSC1412 / ATCC 700720) OX=99287 GN=hisJ PE=1 SV=1 && PF00497:Bacterial extracellular solute-binding proteins, family 3	-	NOT_CHANGE
PA5152	1561.45	1966.33	2063.69	3196.82	2922.15	2081.9	1863.82	2733.62	-0.552693	0.0173937	0.096018	PA5152	NC_002516.2	5800527	5801300	+	774	protein_coding	ABC transporter ATP-binding protein&&sp|O30506|AOTP_PSEAE Arginine/ornithine transport ATP-binding protein AotP OS=Pseudomonas aeruginosa (strain ATCC 15692 / DSM 22644 / CIP 104116 / JCM 14847 / LMG 12228 / 1C / PRS 101 / PAO1) OX=208964 GN=aotP PE=3 SV=2 && PF00005:ABC transporter	ABC_tran	NOT_CHANGE
PA5151	174.48	191.646	179.046	173.545	207.907	132.418	181.724	171.29	0.0838358	0.72092	0.859064	PA5151	NC_002516.2	5799589	5800278	+	690	protein_coding	hypothetical protein&&-- && PF04367:Protein of unknown function (DUF502)	-	NOT_CHANGE
PA5150	532.311	589.605	558.872	776.683	605.602	520.212	560.263	634.165	-0.179187	0.394286	0.619394	PA5150	NC_002516.2	5798693	5799430	-	738	protein_coding	short-chain dehydrogenase&&sp|P05406|FIXR_BRADU Protein FixR OS=Bradyrhizobium diazoefficiens (strain JCM 10833 / BCRC 13528 / IAM 13628 / NBRC 14792 / USDA 110) OX=224911 GN=fixR PE=3 SV=2 && PF13561:Enoyl-(Acyl carrier protein) reductase	-	NOT_CHANGE
PA5149_1	30.5586	31.2891	30.0135	32.2433	27.6574	38.8845	30.6204	32.9284	-0.101271	0.758036	0.877768	PA5149_1	NC_002516.2	5798560	5798635	+	76	protein_coding	tRNA-Phe&&-- && -	-	NOT_CHANGE
PA5149	802.409	915.207	931.453	615.467	702.879	745.111	883.023	687.819	0.360646	0.0340956	0.14537	PA5149	NC_002516.2	5797365	5798447	+	1083	protein_coding	hypothetical protein&&sp|P77376|YDGJ_ECOLI Uncharacterized oxidoreductase YdgJ OS=Escherichia coli (strain K12) OX=83333 GN=ydgJ PE=1 SV=2 && PF02894:Oxidoreductase family, C-terminal alpha/beta domain|PF01408:Oxidoreductase family, NAD-binding Rossmann fold	GFO_IDH_MocA	NOT_CHANGE
PA5148	735.378	974.852	902.475	773.838	924.139	1006.79	870.902	901.59	-0.0497565	0.804636	0.904426	PA5148	NC_002516.2	5797065	5797337	+	273	protein_coding	hypothetical protein&&sp|A6VDR9|FETP_PSEA7 Probable Fe(2+)-trafficking protein OS=Pseudomonas aeruginosa (strain PA7) OX=381754 GN=PSPA7_5885 PE=3 SV=1 && PF04362:Bacterial Fe(2+) trafficking	-	NOT_CHANGE
PA5147	1191.79	1225.17	1206.75	862.981	1266.52	1148.67	1207.9	1092.72	0.144668	0.469799	0.684041	mutY	NC_002516.2	5795954	5797021	+	1068	protein_coding	A/G-specific adenine glycosylase&&sp|P17802|MUTY_ECOLI Adenine DNA glycosylase OS=Escherichia coli (strain K12) OX=83333 GN=mutY PE=1 SV=1 && PF00633:Helix-hairpin-helix motif|PF00730:HhH-GPD superfamily base excision DNA repair protein|PF14815:NUDIX domain	HhH-GPD	NOT_CHANGE
PA5146	2244.58	1946.77	1972.61	1825.54	2159.18	2078.74	2054.65	2021.16	0.0237756	0.882655	0.944006	PA5146	NC_002516.2	5793705	5795957	+	2253	protein_coding	hypothetical protein&&-- && PF05170:AsmA family	-	NOT_CHANGE
PA5145	301.643	302.136	301.17	238.031	202.185	243.816	301.649	228.011	0.404359	0.0233168	0.114317	PA5145	NC_002516.2	5792505	5793611	+	1107	protein_coding	hypothetical protein&&sp|Q9LES4|L2HDH_ARATH L-2-hydroxyglutarate dehydrogenase, mitochondrial OS=Arabidopsis thaliana OX=3702 GN=L2HGDH PE=1 SV=1 && PF01266:FAD dependent oxidoreductase	DAO	NOT_CHANGE
PA5144	27.6013	25.4224	23.8038	36.0366	32.4259	21.0187	25.6092	29.827	-0.224406	0.538769	0.734954	PA5144	NC_002516.2	5791837	5792235	+	399	protein_coding	hypothetical protein&&-- && PF12568:Acetyltransferase (GNAT) domain, PanZ	-	NOT_CHANGE
PA5143	1161.23	957.252	1090.84	673.315	856.426	896.446	1069.77	808.729	0.403795	0.036717	0.15267	hisB	NC_002516.2	5791083	5791676	-	594	protein_coding	imidazoleglycerol-phosphate dehydratase&&sp|A6VDR3|HIS7_PSEA7 Imidazoleglycerol-phosphate dehydratase OS=Pseudomonas aeruginosa (strain PA7) OX=381754 GN=hisB PE=3 SV=1 && PF00475:Imidazoleglycerol-phosphate dehydratase	-	NOT_CHANGE
PA5142	1308.1	1085.34	1048.4	638.227	845.935	960.553	1147.28	814.905	0.493873	0.0253676	0.119945	hisH1	NC_002516.2	5790445	5791086	-	642	protein_coding	imidazole glycerol phosphate synthase subunit HisH&&sp|Q9HU42|HIS51_PSEAE Imidazole glycerol phosphate synthase subunit HisH 1 OS=Pseudomonas aeruginosa (strain ATCC 15692 / DSM 22644 / CIP 104116 / JCM 14847 / LMG 12228 / 1C / PRS 101 / PAO1) OX=208964 GN=hisH1 PE=3 SV=1 && PF00117:Glutamine amidotransferase class-I	GATase	NOT_CHANGE
PA5141	1301.2	1071.65	1002.86	440.974	763.916	727.245	1125.24	644.045	0.805256	0.00211451	0.0226727	hisA	NC_002516.2	5789395	5790132	-	738	protein_coding	1-(5-phosphoribosyl)-5-[(5-phosphoribosylamino)methylideneamino] imidazole-4-carboxamide isomerase&&sp|A6VDR0|HIS4_PSEA7 1-(5-phosphoribosyl)-5-[(5-phosphoribosylamino)methylideneamino] imidazole-4-carboxamide isomerase OS=Pseudomonas aeruginosa (strain PA7) OX=381754 GN=hisA PE=3 SV=1 && PF00977:Histidine biosynthesis protein	-	NOT_CHANGE
PA5140	979.846	966.052	899.37	290.189	627.537	546.485	948.423	488.07	0.958676	0.00120813	0.0149222	hisF1	NC_002516.2	5788614	5789384	-	771	protein_coding	imidazole glycerol phosphate synthase subunit HisF&&sp|Q9HU44|HIS61_PSEAE Imidazole glycerol phosphate synthase subunit hisF1 OS=Pseudomonas aeruginosa (strain ATCC 15692 / DSM 22644 / CIP 104116 / JCM 14847 / LMG 12228 / 1C / PRS 101 / PAO1) OX=208964 GN=hisF1 PE=3 SV=1 && PF00977:Histidine biosynthesis protein	-	NOT_CHANGE
PA5139	277.985	184.801	213.199	62.5898	132.565	173.404	225.328	122.853	0.876772	0.0182506	0.0989162	PA5139	NC_002516.2	5787696	5788442	-	747	protein_coding	hypothetical protein&&-- && PF00497:Bacterial extracellular solute-binding proteins, family 3	-	NOT_CHANGE
PA5138	711.719	802.762	863.147	735.905	872.639	685.208	792.543	764.584	0.0514543	0.780124	0.888906	PA5138	NC_002516.2	5786853	5787605	-	753	protein_coding	hypothetical protein&&-- && PF00497:Bacterial extracellular solute-binding proteins, family 3	-	NOT_CHANGE
PA5137	280.942	572.005	488.495	438.129	491.157	476.073	447.147	468.453	-0.0671629	0.813289	0.909556	PA5137	NC_002516.2	5785948	5786703	-	756	protein_coding	hypothetical protein&&-- && PF00497:Bacterial extracellular solute-binding proteins, family 3	-	NOT_CHANGE
PA5136	1077.44	1039.39	902.475	807.03	1097.71	1172.84	1006.43	1025.86	-0.0272837	0.896805	0.949684	PA5136	NC_002516.2	5784430	5785911	+	1482	protein_coding	hypothetical protein&&-- && -	-	NOT_CHANGE
PA5135	550.055	410.67	452.272	275.964	316.63	326.84	470.999	306.478	0.620349	0.00186775	0.0207202	PA5135	NC_002516.2	5783588	5784361	+	774	protein_coding	hypothetical protein&&sp|P37691|YIBQ_ECOLI Uncharacterized protein YibQ OS=Escherichia coli (strain K12) OX=83333 GN=yibQ PE=3 SV=2 && PF04748:Divergent polysaccharide deacetylase	-	NOT_CHANGE
PA5134	3429.46	2751.49	2868.88	2756.8	2925.96	2868	3016.61	2850.25	0.0818595	0.612993	0.787865	PA5134	NC_002516.2	5782278	5783588	+	1311	protein_coding	carboxyl-terminal protease&&sp|Q44879|CTPA_BARBK Carboxy-terminal-processing protease OS=Bartonella bacilliformis (strain ATCC 35685 / NCTC 12138 / KC583) OX=360095 GN=ctpA PE=3 SV=1 && PF03572:Peptidase family S41|PF17820:PDZ domain	Peptidase_S41	NOT_CHANGE
PA5133	1262.76	1072.63	1126.02	1110.5	1307.53	1181.25	1153.8	1199.76	-0.0563529	0.730674	0.865778	PA5133	NC_002516.2	5780963	5782249	+	1287	protein_coding	hypothetical protein&&sp|P37690|ENVC_ECOLI Murein hydrolase activator EnvC OS=Escherichia coli (strain K12) OX=83333 GN=envC PE=1 SV=2 && PF01551:Peptidase family M23	Peptidase_M23	NOT_CHANGE
PA5132	85.7612	70.4006	65.2017	60.6932	67.7129	69.3616	73.7878	65.9226	0.164212	0.517551	0.719709	PA5132	NC_002516.2	5779995	5780813	+	819	protein_coding	hypothetical protein&&-- && PF02517:CPBP intramembrane metalloprotease	-	NOT_CHANGE
PA5131	2200.22	2043.57	2139.24	1517.33	1666.12	1997.82	2127.68	1727.09	0.301131	0.0833905	0.248892	pgm	NC_002516.2	5778134	5779681	+	1548	protein_coding	2%2C3-bisphosphoglycerate-independent phosphoglycerate mutase&&sp|Q9HU53|GPMI_PSEAE 2,3-bisphosphoglycerate-independent phosphoglycerate mutase OS=Pseudomonas aeruginosa (strain ATCC 15692 / DSM 22644 / CIP 104116 / JCM 14847 / LMG 12228 / 1C / PRS 101 / PAO1) OX=208964 GN=gpmI PE=3 SV=1 && PF06415:BPG-independent PGAM N-terminus (iPGM_N)|PF01676:Metalloenzyme superfamily	-	NOT_CHANGE
PA5130	540.197	437.07	575.431	362.262	439.657	454.003	517.566	418.641	0.306162	0.128713	0.323088	PA5130	NC_002516.2	5777390	5777809	-	420	protein_coding	hypothetical protein&&-- && PF00581:Rhodanese-like domain	Rhodanese	NOT_CHANGE
PA5129	456.407	439.026	461.587	198.201	304.231	415.118	452.34	305.85	0.565533	0.0472145	0.177693	grx	NC_002516.2	5777134	5777388	-	255	protein_coding	glutaredoxin&&sp|Q9HU55|GLRX_PSEAE Glutaredoxin OS=Pseudomonas aeruginosa (strain ATCC 15692 / DSM 22644 / CIP 104116 / JCM 14847 / LMG 12228 / 1C / PRS 101 / PAO1) OX=208964 GN=grx PE=3 SV=1 && PF00462:Glutaredoxin	-	NOT_CHANGE
PA5128	4069.22	5285.91	5201.65	1590.35	2835.36	3081.33	4852.26	2502.35	0.955449	0.000788069	0.0107855	secB	NC_002516.2	5776606	5777097	-	492	protein_coding	preprotein translocase subunit SecB&&sp|A6VDP6|SECB_PSEA7 Protein-export protein SecB OS=Pseudomonas aeruginosa (strain PA7) OX=381754 GN=secB PE=3 SV=1 && PF02556:Preprotein translocase subunit SecB	-	NOT_CHANGE
PA5127	159.693	129.068	193.535	146.043	127.796	158.691	160.765	144.177	0.157049	0.511439	0.715594	PA5127	NC_002516.2	5776086	5776547	+	462	protein_coding	rRNA methylase&&sp|A0KEQ6|TRML_AERHH tRNA (cytidine(34)-2'-O)-methyltransferase OS=Aeromonas hydrophila subsp. hydrophila (strain ATCC 7966 / DSM 30187 / BCRC 13018 / CCUG 14551 / JCM 1027 / KCTC 2358 / NCIMB 9240 / NCTC 8049) OX=380703 GN=trmL PE=3 SV=2 && PF00588:SpoU rRNA Methylase family	SpoU_methylase	NOT_CHANGE
PA5126	253.341	329.514	271.156	331.916	254.639	265.886	284.67	284.147	0.00247172	0.990772	0.995707	PA5126	NC_002516.2	5775620	5776087	-	468	protein_coding	hypothetical protein&&-- && -	-	NOT_CHANGE
PA5125	861.555	764.628	676.856	504.512	708.602	746.162	767.68	653.092	0.233628	0.2952	0.52737	ntrC	NC_002516.2	5773377	5774807	+	1431	protein_coding	two-component response regulator NtrC&&sp|P41789|NTRC_SALTY DNA-binding transcriptional regulator NtrC OS=Salmonella typhimurium (strain LT2 / SGSC1412 / ATCC 700720) OX=99287 GN=glnG PE=1 SV=2 && PF00158:Sigma-54 interaction domain|PF02954:Bacterial regulatory protein, Fis family|PF00072:Response regulator receiver domain	Sigma54_activat	NOT_CHANGE
PA5124	266.155	275.736	264.947	293.034	302.324	304.77	268.946	300.043	-0.157625	0.331378	0.564243	ntrB	NC_002516.2	5772298	5773374	+	1077	protein_coding	two-component sensor NtrB&&sp|P19906|NTRB_VIBAL Sensory histidine kinase/phosphatase NtrB OS=Vibrio alginolyticus OX=663 GN=ntrB PE=3 SV=1 && PF00989:PAS fold|PF02518:Histidine kinase-, DNA gyrase B-, and HSP90-like ATPase|PF00512:His Kinase A (phospho-acceptor) domain	HisKA	NOT_CHANGE
PA5123	294.743	249.335	287.716	268.378	267.991	370.979	277.264	302.449	-0.124512	0.568333	0.755584	PA5123	NC_002516.2	5771455	5772027	+	573	protein_coding	hypothetical protein&&-- && PF13511:Domain of unknown function (DUF4124)	-	NOT_CHANGE
PA5122	542.169	474.226	496.775	448.561	473.991	540.179	504.39	487.577	0.0494264	0.773455	0.886571	PA5122	NC_002516.2	5770937	5771458	+	522	protein_coding	hypothetical protein&&-- && PF13511:Domain of unknown function (DUF4124)	-	NOT_CHANGE
PA5121	535.268	510.404	510.229	520.634	548.379	514.957	518.634	527.99	-0.0258884	0.861653	0.93179	PA5121	NC_002516.2	5768442	5770649	-	2208	protein_coding	hypothetical protein&&sp|P75783|YBIO_ECOLI Moderate conductance mechanosensitive channel YbiO OS=Escherichia coli (strain K12) OX=83333 GN=ybiO PE=1 SV=2 && PF00924:Mechanosensitive ion channel	-	NOT_CHANGE
PA5120	141.95	136.89	123.159	128.025	157.361	159.742	133.999	148.376	-0.145748	0.491075	0.700598	PA5120	NC_002516.2	5768041	5768445	+	405	protein_coding	hypothetical protein&&-- && -	-	NOT_CHANGE
PA5119	22514.8	19268.2	17176	13210.3	14615.5	16974.7	19653	14933.5	0.396223	0.0383575	0.156975	glnA	NC_002516.2	5766484	5767893	+	1410	protein_coding	glutamine synthetase&&sp|Q9HU65|GLN1B_PSEAE Glutamine synthetase OS=Pseudomonas aeruginosa (strain ATCC 15692 / DSM 22644 / CIP 104116 / JCM 14847 / LMG 12228 / 1C / PRS 101 / PAO1) OX=208964 GN=glnA PE=1 SV=1 && PF00120:Glutamine synthetase, catalytic domain|PF03951:Glutamine synthetase, beta-Grasp domain	-	NOT_CHANGE
PA5118	1251.92	1073.61	1050.47	336.657	708.602	961.603	1125.33	668.954	0.75074	0.0347149	0.147089	thiI	NC_002516.2	5764693	5766147	-	1455	protein_coding	thiamine biosynthesis protein ThiI&&sp|B7V3L1|THII_PSEA8 tRNA sulfurtransferase OS=Pseudomonas aeruginosa (strain LESB58) OX=557722 GN=thiI PE=3 SV=1 && PF02926:THUMP domain|PF02568:Thiamine biosynthesis protein (ThiI)	-	NOT_CHANGE
PA5117	3569.44	3594.34	3558.15	957.814	2958.39	2829.11	3573.98	2248.44	0.668663	0.0822266	0.247043	typA	NC_002516.2	5762659	5764476	-	1818	protein_coding	regulatory protein TypA&&sp|P0A3B2|BIPA_ECO27 50S ribosomal subunit assembly factor BipA OS=Escherichia coli O127:H6 (strain E2348/69 / EPEC) OX=574521 GN=bipA PE=1 SV=1 && PF00679:Elongation factor G C-terminus|PF00009:Elongation factor Tu GTP binding domain|PF03144:Elongation factor Tu domain 2	GTP_EFTU	NOT_CHANGE
PA5116	76.8894	85.0673	112.809	100.523	112.537	95.6349	91.5887	102.898	-0.17005	0.49658	0.704577	PA5116	NC_002516.2	5762150	5762575	+	426	protein_coding	transcriptional regulator&&-- && PF13411:MerR HTH family regulatory protein	-	NOT_CHANGE
PA5115	183.352	212.179	203.885	270.274	189.787	229.103	199.805	229.722	-0.201404	0.352177	0.58201	PA5115	NC_002516.2	5761482	5762066	-	585	protein_coding	hypothetical protein&&-- && PF13649:Methyltransferase domain	-	NOT_CHANGE
PA5114	1630.45	1482.32	1529.65	1572.33	2149.65	2087.15	1547.47	1936.38	-0.323359	0.0877292	0.258202	PA5114	NC_002516.2	5757738	5761343	-	3606	protein_coding	hypothetical protein&&-- && PF10101:Predicted membrane protein (DUF2339)	-	NOT_CHANGE
PA5113	1338.66	1776.64	1600.03	1667.17	2322.27	2600.01	1571.78	2196.48	-0.48269	0.0387598	0.157909	PA5113	NC_002516.2	5756347	5757741	-	1395	protein_coding	hypothetical protein&&-- && PF13163:Protein of unknown function (DUF3999)	-	NOT_CHANGE
PA5112	4166.81	4896.75	4607.59	6338.64	5639.25	6279.32	4557.05	6085.74	-0.417318	0.00615607	0.0484872	estA	NC_002516.2	5754298	5756238	-	1941	protein_coding	esterase&&sp|O33407|ESTA_PSEAE Esterase EstA OS=Pseudomonas aeruginosa (strain ATCC 15692 / DSM 22644 / CIP 104116 / JCM 14847 / LMG 12228 / 1C / PRS 101 / PAO1) OX=208964 GN=estA PE=1 SV=1 && PF00657:GDSL-like Lipase/Acylhydrolase|PF03797:Autotransporter beta-domain	Lipase_GDSL	NOT_CHANGE
PA5111	697.919	781.251	816.574	809.875	822.092	776.639	765.248	802.869	-0.0694649	0.651956	0.814233	gloA3	NC_002516.2	5753614	5754144	-	531	protein_coding	lactoylglutathione lyase&&sp|Q9HU72|LGUL_PSEAE Lactoylglutathione lyase OS=Pseudomonas aeruginosa (strain ATCC 15692 / DSM 22644 / CIP 104116 / JCM 14847 / LMG 12228 / 1C / PRS 101 / PAO1) OX=208964 GN=gloA PE=3 SV=1 && PF00903:Glyoxalase/Bleomycin resistance protein/Dioxygenase superfamily	Glyoxalase	NOT_CHANGE
PA5110	8608.65	7253.21	7081.11	5333.41	6903.86	6537.85	7647.66	6258.38	0.289254	0.117756	0.306165	fbp	NC_002516.2	5752464	5753474	-	1011	protein_coding	fructose-1%2C6-bisphosphatase&&sp|B7V3K3|F16PA_PSEA8 Fructose-1,6-bisphosphatase class 1 OS=Pseudomonas aeruginosa (strain LESB58) OX=557722 GN=fbp PE=3 SV=1 && PF00316:Fructose-1-6-bisphosphatase, N-terminal domain	-	NOT_CHANGE
PA5109	1939.98	1419.74	1542.07	1002.39	1315.16	1523.85	1633.93	1280.47	0.35188	0.131207	0.327087	PA5109	NC_002516.2	5751857	5752459	-	603	protein_coding	hypothetical protein&&-- && PF06041:Bacterial protein of unknown function (DUF924)	-	NOT_CHANGE
PA5108	525.411	530.938	577.501	591.759	578.898	565.402	544.616	578.686	-0.0878328	0.5583	0.748845	PA5108	NC_002516.2	5751527	5751784	-	258	protein_coding	hypothetical protein&&-- && PF04355:SmpA / OmlA family	-	NOT_CHANGE
PA5107	939.43	867.296	866.251	995.748	898.389	901.7	890.992	931.945	-0.0649075	0.662721	0.820792	blc	NC_002516.2	5750961	5751530	-	570	protein_coding	outer membrane lipoprotein Blc&&sp|Q46036|BLC_CITFR Outer membrane lipoprotein Blc OS=Citrobacter freundii OX=546 PE=3 SV=1 && PF08212:Lipocalin-like domain	Lipocalin_2	NOT_CHANGE
PA5106	182.366	272.802	285.646	709.352	693.342	342.604	246.938	581.766	-1.23689	0.000192937	0.00378032	PA5106	NC_002516.2	5749453	5750814	+	1362	protein_coding	N-formimino-L-glutamate deiminase&&sp|A7I6C5|DADD_METB6 5'-deoxyadenosine deaminase OS=Methanoregula boonei (strain DSM 21154 / JCM 14090 / 6A8) OX=456442 GN=dadD PE=3 SV=1 && PF01979:Amidohydrolase family	Amidohydro_1	DOWN
PA5105	537.24	590.582	605.445	899.966	904.111	695.717	577.756	833.265	-0.52877	0.00458587	0.0399668	hutC	NC_002516.2	5748600	5749352	-	753	protein_coding	histidine utilization repressor HutC&&sp|Q9HU78|HUTC_PSEAE Histidine utilization repressor OS=Pseudomonas aeruginosa (strain ATCC 15692 / DSM 22644 / CIP 104116 / JCM 14847 / LMG 12228 / 1C / PRS 101 / PAO1) OX=208964 GN=hutC PE=3 SV=1 && PF07702:UTRA domain|PF00392:Bacterial regulatory proteins, gntR family	UTRA	NOT_CHANGE
PA5104	233.625	288.447	213.199	306.311	276.574	241.715	245.09	274.866	-0.165614	0.437936	0.657146	PA5104	NC_002516.2	5748013	5748603	-	591	protein_coding	hypothetical protein&&sp|P24696|YHUT_PSEPU Uncharacterized 21.2 kDa protein in hutC 3'region OS=Pseudomonas putida OX=303 PE=4 SV=1 && PF05962:HutD	-	NOT_CHANGE
PA5103	283.899	249.335	280.471	462.786	389.111	364.674	271.235	405.523	-0.580895	0.00209396	0.0225411	PA5103	NC_002516.2	5746849	5747871	-	1023	protein_coding	hypothetical protein&&-- && PF04069:Substrate binding domain of ABC-type glycine betaine transport system	-	NOT_CHANGE
PA5102	21.6867	21.5113	18.6291	15.1733	38.1481	17.8659	20.609	23.7291	-0.205593	0.654345	0.815424	PA5102	NC_002516.2	5745895	5746833	-	939	protein_coding	hypothetical protein&&-- && PF00487:Fatty acid desaturase	-	NOT_CHANGE
PA5101	54.2169	27.378	39.328	51.2099	49.5926	53.5976	40.3076	51.4667	-0.352295	0.285802	0.518921	PA5101	NC_002516.2	5745079	5745876	-	798	protein_coding	hypothetical protein&&-- && PF12974:ABC transporter, phosphonate, periplasmic substrate-binding protein	-	NOT_CHANGE
PA5100	152.793	175.024	186.291	567.102	332.843	213.339	171.369	371.095	-1.11545	0.00161827	0.0187149	hutU	NC_002516.2	5743074	5744753	-	1680	protein_coding	urocanate hydratase&&sp|Q9HU83|HUTU_PSEAE Urocanate hydratase OS=Pseudomonas aeruginosa (strain ATCC 15692 / DSM 22644 / CIP 104116 / JCM 14847 / LMG 12228 / 1C / PRS 101 / PAO1) OX=208964 GN=hutU PE=1 SV=1 && PF17392:Urocanase C-terminal domain|PF17391:Urocanase N-terminal domain|PF01175:Urocanase Rossmann-like domain	Urocanase	DOWN
PA5099	24.644	35.2003	41.3979	80.6081	43.8704	53.5976	33.7474	59.3587	-0.817252	0.0236858	0.115814	PA5099	NC_002516.2	5741524	5742966	-	1443	protein_coding	transporter&&sp|P94369|YXLA_BACSU Putative purine-cytosine permease YxlA OS=Bacillus subtilis (strain 168) OX=224308 GN=yxlA PE=3 SV=1 && PF02133:Permease for cytosine/purines, uracil, thiamine, allantoin	-	NOT_CHANGE
PA5098	66.046	38.1336	39.328	107.161	63.8981	75.6672	47.8359	82.2422	-0.781672	0.0229178	0.112971	hutH	NC_002516.2	5739898	5741427	-	1530	protein_coding	histidine ammonia-lyase&&sp|B7V3J1|HUTH_PSEA8 Histidine ammonia-lyase OS=Pseudomonas aeruginosa (strain LESB58) OX=557722 GN=hutH PE=3 SV=1 && PF00221:Aromatic amino acid lyase	-	NOT_CHANGE
PA5097	44.3592	44.0003	26.9086	63.5382	67.7129	74.6162	38.4227	68.6224	-0.832911	0.00567702	0.046016	PA5097	NC_002516.2	5738432	5739835	-	1404	protein_coding	amino acid permease&&sp|P37460|PROY_SALTY Proline-specific permease ProY OS=Salmonella typhimurium (strain LT2 / SGSC1412 / ATCC 700720) OX=99287 GN=proY PE=3 SV=3 && PF00324:Amino acid permease	AA_permease	NOT_CHANGE
PA5096	71.9606	69.4228	77.6211	118.541	83.9259	83.0237	73.0015	95.1637	-0.384412	0.138597	0.338841	PA5096	NC_002516.2	5737346	5738314	-	969	protein_coding	ABC transporter&&-- && PF04069:Substrate binding domain of ABC-type glycine betaine transport system	-	NOT_CHANGE
PA5095	121.249	95.823	119.019	92.9364	106.815	111.399	112.03	103.717	0.111699	0.624442	0.796006	PA5095	NC_002516.2	5736470	5737321	-	852	protein_coding	ABC transporter permease&&sp|P14176|PROW_ECOLI Glycine betaine/proline betaine transport system permease protein ProW OS=Escherichia coli (strain K12) OX=83333 GN=proW PE=1 SV=1 && PF00528:Binding-protein-dependent transport system inner membrane component	BPD_transp_1	NOT_CHANGE
PA5094	245.454	236.624	219.409	273.119	284.204	275.344	233.829	277.556	-0.247079	0.146315	0.351557	PA5094	NC_002516.2	5735643	5736473	-	831	protein_coding	ABC transporter ATP-binding protein&&sp|E0SCY1|OUSV_DICD3 Glycine betaine/choline transport system ATP-binding protein OusV OS=Dickeya dadantii (strain 3937) OX=198628 GN=ousV PE=1 SV=1 && PF00005:ABC transporter	ABC_tran	NOT_CHANGE
PA5093	330.23	266.935	211.129	235.186	286.111	347.859	269.432	289.719	-0.10362	0.686517	0.834514	PA5093	NC_002516.2	5734114	5735646	-	1533	protein_coding	histidine/phenylalanine ammonia-lyase&&sp|Q67JH4|HUTH_SYMTH Histidine ammonia-lyase OS=Symbiobacterium thermophilum (strain T / IAM 14863) OX=292459 GN=hutH PE=3 SV=1 && PF00221:Aromatic amino acid lyase	-	NOT_CHANGE
PA5092	278.97	207.291	208.025	266.481	182.157	281.65	231.428	243.429	-0.0721374	0.777886	0.888477	hutI	NC_002516.2	5732909	5734117	-	1209	protein_coding	imidazolonepropionase&&sp|Q9HU91|HUTI_PSEAE Imidazolonepropionase OS=Pseudomonas aeruginosa (strain ATCC 15692 / DSM 22644 / CIP 104116 / JCM 14847 / LMG 12228 / 1C / PRS 101 / PAO1) OX=208964 GN=hutI PE=3 SV=1 && PF01979:Amidohydrolase family	Amidohydro_1	NOT_CHANGE
PA5091	351.917	234.669	226.654	287.344	207.907	302.669	271.08	265.973	0.0281248	0.916466	0.95926	hutG	NC_002516.2	5732116	5732916	-	801	protein_coding	N-formylglutamate amidohydrolase&&-- && PF05013:N-formylglutamate amidohydrolase	-	NOT_CHANGE
PA5090	275.027	207.291	240.108	222.858	330.935	301.618	240.809	285.137	-0.243528	0.302145	0.535464	PA5090	NC_002516.2	5729473	5731845	-	2373	protein_coding	hypothetical protein&&sp|Q9HU93|VGRG5_PSEAE Type VI secretion system spike protein VgrG5 OS=Pseudomonas aeruginosa (strain ATCC 15692 / DSM 22644 / CIP 104116 / JCM 14847 / LMG 12228 / 1C / PRS 101 / PAO1) OX=208964 GN=vgrG5 PE=3 SV=1 && PF05954:Phage late control gene D protein (GPD)	-	NOT_CHANGE
PA5089	265.17	283.558	270.121	206.736	336.657	304.77	272.95	282.721	-0.0503337	0.832389	0.918397	PA5089	NC_002516.2	5727239	5729476	-	2238	protein_coding	hypothetical protein&&sp|Q70EW5|PLDA1_CYNCA Phospholipase D alpha 1 OS=Cynara cardunculus OX=4265 GN=PLD1 PE=1 SV=2 && -	-	NOT_CHANGE
PA5088	168.565	203.379	143.858	186.821	146.87	129.265	171.934	154.319	0.155369	0.531351	0.728242	PA5088	NC_002516.2	5726357	5727238	-	882	protein_coding	hypothetical protein&&-- && -	-	NOT_CHANGE
PA5087	273.056	270.847	231.828	283.551	248.917	207.034	258.577	246.5	0.0683112	0.742502	0.870199	PA5087	NC_002516.2	5725479	5726348	-	870	protein_coding	hypothetical protein&&-- && -	-	NOT_CHANGE
PA5085	207.01	251.291	295.995	335.709	294.694	243.816	251.432	291.407	-0.214012	0.354959	0.583951	PA5085	NC_002516.2	5723582	5724538	+	957	protein_coding	transcriptional regulator&&sp|Q00678|NOCR_AGRFC Regulatory protein NocR OS=Agrobacterium fabrum (strain C58 / ATCC 33970) OX=176299 GN=nocR PE=3 SV=1 && PF00126:Bacterial regulatory helix-turn-helix protein, lysR family|PF03466:LysR substrate binding domain	LysR_substrate	NOT_CHANGE
PA5084	100.548	109.512	150.067	563.309	525.491	286.905	120.042	458.568	-1.93485	9.74e-10	1.08e-07	PA5084	NC_002516.2	5722267	5723517	-	1251	protein_coding	oxidoreductase&&sp|Q9HU99|DADA2_PSEAE D-amino acid dehydrogenase 2 OS=Pseudomonas aeruginosa (strain ATCC 15692 / DSM 22644 / CIP 104116 / JCM 14847 / LMG 12228 / 1C / PRS 101 / PAO1) OX=208964 GN=dadA2 PE=3 SV=1 && PF01266:FAD dependent oxidoreductase	DAO	DOWN
PA5083	59.1457	52.8004	85.9007	403.041	292.787	174.455	65.9489	290.094	-2.13911	2.24e-09	2.22e-07	PA5083	NC_002516.2	5721892	5722242	-	351	protein_coding	hypothetical protein&&sp|O66689|Y364_AQUAE RutC family protein aq_364 OS=Aquifex aeolicus (strain VF5) OX=224324 GN=aq_364 PE=3 SV=1 && PF01042:Endoribonuclease L-PSP	Ribonuc_L-PSP	DOWN
PA5082	307.557	405.781	441.923	2165.99	1534.51	801.862	385.087	1500.79	-1.96272	3.84e-08	2.72e-06	PA5082	NC_002516.2	5720950	5721849	-	900	protein_coding	ABC transporter&&sp|P37902|GLTI_ECOLI Glutamate/aspartate import solute-binding protein OS=Escherichia coli (strain K12) OX=83333 GN=gltI PE=1 SV=2 && PF00497:Bacterial extracellular solute-binding proteins, family 3	-	DOWN
PA5081	121.249	127.112	115.914	268.378	179.296	141.876	121.425	196.517	-0.695663	0.0143785	0.0850554	PA5081	NC_002516.2	5720469	5720945	+	477	protein_coding	hypothetical protein&&-- && PF00293:NUDIX domain	NUDIX	NOT_CHANGE
PA5080	1045.89	998.319	910.754	957.814	1129.18	1061.44	984.989	1049.48	-0.0913577	0.56949	0.756035	PA5080	NC_002516.2	5719316	5720287	-	972	protein_coding	prolyl aminopeptidase&&sp|P52279|PIP_XANCI Proline iminopeptidase OS=Xanthomonas citri OX=346 GN=pip PE=1 SV=2 && PF00561:alpha/beta hydrolase fold	Abhydrolase_1	NOT_CHANGE
PA5079	358.817	430.226	432.608	380.281	430.12	397.253	407.217	402.551	0.0164365	0.925855	0.964787	PA5079	NC_002516.2	5718882	5719319	-	438	protein_coding	D-tyrosyl-tRNA(Tyr) deacylase&&sp|B7V3H2|DTD_PSEA8 D-aminoacyl-tRNA deacylase OS=Pseudomonas aeruginosa (strain LESB58) OX=557722 GN=dtd PE=3 SV=1 && PF02580:D-Tyr-tRNA(Tyr) deacylase	-	NOT_CHANGE
PA5078	6343.37	5639.87	5568.02	5537.3	6077.95	5695	5850.42	5770.09	0.0199525	0.890287	0.947547	PA5078	NC_002516.2	5716848	5718425	-	1578	protein_coding	glucan biosynthesis protein G&&sp|B7V3H1|OPGG_PSEA8 Glucans biosynthesis protein G OS=Pseudomonas aeruginosa (strain LESB58) OX=557722 GN=opgG PE=3 SV=1 && PF04349:Periplasmic glucan biosynthesis protein, MdoG	-	NOT_CHANGE
PA5077	3590.14	2953.89	3094.49	2414.45	3111.93	2839.62	3212.84	2788.67	0.204299	0.261149	0.492548	mdoH	NC_002516.2	5714270	5716855	-	2586	protein_coding	glucosyltransferase MdoH&&sp|B7V3H0|OPGH_PSEA8 Glucans biosynthesis glucosyltransferase H OS=Pseudomonas aeruginosa (strain LESB58) OX=557722 GN=opgH PE=3 SV=1 && PF00535:Glycosyl transferase family 2	Glycos_transf_2	NOT_CHANGE
PA5076	830.011	1038.41	1068.07	688.488	996.62	1292.65	978.828	992.585	-0.0198867	0.94132	0.970358	PA5076	NC_002516.2	5713232	5714032	-	801	protein_coding	ABC transporter&&sp|Q06758|HISJ_NEIGO Probable histidine-binding protein OS=Neisseria gonorrhoeae OX=485 GN=hisJ PE=3 SV=1 && PF00497:Bacterial extracellular solute-binding proteins, family 3	-	NOT_CHANGE
PA5075	596.385	636.538	712.044	337.606	660.916	634.763	648.323	544.429	0.252177	0.378234	0.604354	PA5075	NC_002516.2	5712204	5713166	-	963	protein_coding	ABC transporter permease&&sp|P0AEQ8|GLNP_ECO57 Glutamine transport system permease protein GlnP OS=Escherichia coli O157:H7 OX=83334 GN=glnP PE=3 SV=1 && PF00528:Binding-protein-dependent transport system inner membrane component	BPD_transp_1	NOT_CHANGE
PA5074	485.98	676.628	598.2	287.344	651.379	464.512	586.936	467.745	0.327502	0.301728	0.534997	PA5074	NC_002516.2	5711477	5712211	-	735	protein_coding	ABC transporter ATP-binding protein&&sp|O34677|GLNQ_BACSU Glutamine transport ATP-binding protein GlnQ OS=Bacillus subtilis (strain 168) OX=224308 GN=glnQ PE=2 SV=1 && PF00005:ABC transporter	ABC_tran	NOT_CHANGE
PA5073	483.023	514.315	505.055	584.172	552.194	460.309	500.798	532.225	-0.088377	0.613446	0.788135	PA5073	NC_002516.2	5711008	5711469	+	462	protein_coding	hypothetical protein&&sp|Q9HUB0|Y5073_PSEAE UPF0158 protein PA5073 OS=Pseudomonas aeruginosa (strain ATCC 15692 / DSM 22644 / CIP 104116 / JCM 14847 / LMG 12228 / 1C / PRS 101 / PAO1) OX=208964 GN=PA5073 PE=3 SV=1 && PF03682:Uncharacterised protein family (UPF0158)	-	NOT_CHANGE
PA5072	369.66	301.158	372.581	274.068	440.611	498.142	347.8	404.274	-0.21664	0.421072	0.643721	PA5072	NC_002516.2	5708955	5710898	+	1944	protein_coding	chemotaxis transducer&&sp|Q88D09|MCPQ_PSEPK Methyl-accepting chemotaxis protein McpQ OS=Pseudomonas putida (strain ATCC 47054 / DSM 6125 / NCIMB 11950 / KT2440) OX=160488 GN=mcpQ PE=1 SV=1 && PF00672:HAMP domain|PF16591:Helical bimodular sensor domain|PF00015:Methyl-accepting chemotaxis protein (MCP) signalling domain	HAMP	NOT_CHANGE
PA5071	337.13	223.913	193.535	131.818	177.389	198.626	251.526	169.278	0.572481	0.0484817	0.179807	PA5071	NC_002516.2	5708036	5708743	+	708	protein_coding	16S ribosomal RNA methyltransferase RsmE&&-- && PF04452:RNA methyltransferase	-	NOT_CHANGE
PA5070	1042.94	828.184	852.797	638.227	811.602	678.903	907.972	709.577	0.355643	0.0662891	0.215955	tatC	NC_002516.2	5707236	5708039	+	804	protein_coding	transporter TatC&&sp|P54085|TATC_AZOCH Sec-independent protein translocase protein TatC OS=Azotobacter chroococcum mcd 1 OX=355 GN=tatC PE=3 SV=2 && PF00902:Sec-independent protein translocase protein (TatC)	-	NOT_CHANGE
PA5069	1638.33	1487.21	1570.02	1439.57	1537.37	1473.41	1565.19	1483.45	0.0773574	0.57788	0.762214	tatB	NC_002516.2	5706814	5707239	+	426	protein_coding	sec-independent translocase&&sp|Q02EU8|TATB_PSEAB Sec-independent protein translocase protein TatB OS=Pseudomonas aeruginosa (strain UCBPP-PA14) OX=208963 GN=tatB PE=3 SV=1 && PF02416:mttA/Hcf106 family	-	NOT_CHANGE
PA5068	1355.42	1415.83	1410.63	1749.67	1579.33	1314.72	1393.96	1547.91	-0.15135	0.387493	0.612855	tatA	NC_002516.2	5706552	5706800	+	249	protein_coding	twin-arginine translocation protein TatA&&sp|B7V3G1|TATA_PSEA8 Sec-independent protein translocase protein TatA OS=Pseudomonas aeruginosa (strain LESB58) OX=557722 GN=tatA PE=3 SV=1 && PF02416:mttA/Hcf106 family	-	NOT_CHANGE
PA5067	1122.78	1088.28	993.55	1229.04	1172.1	1049.88	1068.2	1150.34	-0.106993	0.496435	0.704555	hisE	NC_002516.2	5706191	5706526	+	336	protein_coding	phosphoribosyl-ATP pyrophosphatase&&sp|B7V3G0|HIS2_PSEA8 Phosphoribosyl-ATP pyrophosphatase OS=Pseudomonas aeruginosa (strain LESB58) OX=557722 GN=hisE PE=3 SV=1 && PF01503:Phosphoribosyl-ATP pyrophosphohydrolase	-	NOT_CHANGE
PA5066	996.604	998.319	1030.81	1143.69	1028.09	965.807	1008.58	1045.86	-0.052623	0.729683	0.865169	hisI	NC_002516.2	5705794	5706198	+	405	protein_coding	phosphoribosyl-AMP cyclohydrolase&&sp|B7V3F9|HIS3_PSEA8 Phosphoribosyl-AMP cyclohydrolase OS=Pseudomonas aeruginosa (strain LESB58) OX=557722 GN=hisI PE=3 SV=1 && PF01502:Phosphoribosyl-AMP cyclohydrolase	-	NOT_CHANGE
PA5065	1225.3	1077.52	1099.11	604.087	940.352	984.724	1133.98	843.054	0.42796	0.0701157	0.222681	ubiB	NC_002516.2	5704077	5705678	+	1602	protein_coding	ubiquinone biosynthetic protein UbiB&&sp|Q9HUB8|UBIB_PSEAE Probable protein kinase UbiB OS=Pseudomonas aeruginosa (strain ATCC 15692 / DSM 22644 / CIP 104116 / JCM 14847 / LMG 12228 / 1C / PRS 101 / PAO1) OX=208964 GN=ubiB PE=3 SV=1 && PF03109:ABC1 family	ABC1	NOT_CHANGE
PA5064	663.417	494.759	494.705	320.536	373.852	571.707	550.961	422.032	0.385397	0.164186	0.376873	PA5064	NC_002516.2	5703454	5704080	+	627	protein_coding	hypothetical protein&&-- && PF02036:SCP-2 sterol transfer family	-	NOT_CHANGE
PA5063	1672.84	1482.32	1432.37	1384.56	1255.07	1454.49	1529.18	1364.71	0.164331	0.302659	0.536125	ubiE	NC_002516.2	5702669	5703439	+	771	protein_coding	ubiquinone/menaquinone biosynthesis methyltransferase&&sp|B7V3F6|UBIE_PSEA8 Ubiquinone/menaquinone biosynthesis C-methyltransferase UbiE OS=Pseudomonas aeruginosa (strain LESB58) OX=557722 GN=ubiE PE=3 SV=1 && PF01209:ubiE/COQ5 methyltransferase family	-	NOT_CHANGE
PA5062	300.657	318.758	300.135	206.736	251.778	177.608	306.517	212.04	0.530562	0.00978198	0.0652172	PA5062	NC_002516.2	5702258	5702533	-	276	protein_coding	hypothetical protein&&-- && PF09650:Putative polyhydroxyalkanoic acid system protein (PHA_gran_rgn)	-	NOT_CHANGE
PA5061	1395.84	1551.75	1442.72	3998.16	2166.81	1502.83	1463.43	2555.94	-0.804586	0.0197015	0.103685	PA5061	NC_002516.2	5701698	5702114	-	417	protein_coding	hypothetical protein&&-- && PF05597:Poly(hydroxyalcanoate) granule associated protein (phasin)	-	NOT_CHANGE
PA5060	8837.35	9317.32	9317.64	18074.2	10487.9	10496.7	9157.43	13019.6	-0.507688	0.0502243	0.182991	phaF	NC_002516.2	5700758	5701687	-	930	protein_coding	polyhydroxyalkanoate synthesis protein PhaF&&-- && PF05597:Poly(hydroxyalcanoate) granule associated protein (phasin)	-	NOT_CHANGE
PA5059	50.2738	63.5561	82.7958	56.8999	60.0833	86.1765	65.5419	67.7199	-0.045752	0.883134	0.944031	PA5059	NC_002516.2	5700097	5700714	+	618	protein_coding	transcriptional regulator&&-- && PF00440:Bacterial regulatory proteins, tetR family|PF13972:Bacterial transcriptional repressor	TetR_N	NOT_CHANGE
PA5058	219.825	211.202	172.836	267.429	242.241	240.664	201.288	250.111	-0.312973	0.108152	0.290772	phaC2	NC_002516.2	5698359	5700041	+	1683	protein_coding	poly(3-hydroxyalkanoic acid) synthase&&sp|P26496|PHAC2_PSEOL Poly(3-hydroxyalkanoate) polymerase 2 OS=Pseudomonas oleovorans OX=301 GN=phaC2 PE=3 SV=1 && PF07167:Poly-beta-hydroxybutyrate polymerase (PhaC) N-terminus	-	NOT_CHANGE
PA5057	338.116	260.091	317.729	391.661	304.231	298.465	305.312	331.452	-0.119135	0.57845	0.762214	phaD	NC_002516.2	5697198	5698055	+	858	protein_coding	poly(3-hydroxyalkanoic acid) depolymerase&&sp|P26495|PHAZ_PSEOL Poly(3-hydroxyalkanoate) depolymerase OS=Pseudomonas oleovorans OX=301 GN=phaZ PE=3 SV=1 && PF00561:alpha/beta hydrolase fold	Abhydrolase_1	NOT_CHANGE
PA5056	904.929	921.074	924.209	1487.93	1194.04	1248.51	916.737	1310.16	-0.515272	0.00174448	0.0199626	phaC1	NC_002516.2	5695366	5697045	+	1680	protein_coding	poly(3-hydroxyalkanoic acid) synthase&&sp|P26494|PHAC1_PSEOL Poly(3-hydroxyalkanoate) polymerase 1 OS=Pseudomonas oleovorans OX=301 GN=phaC1 PE=3 SV=1 && PF07167:Poly-beta-hydroxybutyrate polymerase (PhaC) N-terminus	-	NOT_CHANGE
PA5055	358.817	499.648	546.453	607.88	414.861	302.669	468.306	441.803	0.0834065	0.785438	0.890567	PA5055	NC_002516.2	5694576	5694947	+	372	protein_coding	hypothetical protein&&-- && PF06155:Protein of unknown function (DUF971)	-	NOT_CHANGE
PA5054	2941.51	6286.18	5519.38	10269.5	5447.55	2602.11	4915.69	6106.38	-0.312957	0.50187	0.70876	hslU	NC_002516.2	5693138	5694481	+	1344	protein_coding	ATP-dependent protease ATP-binding subunit HslU&&sp|B7V3E7|HSLU_PSEA8 ATP-dependent protease ATPase subunit HslU OS=Pseudomonas aeruginosa (strain LESB58) OX=557722 GN=hslU PE=3 SV=1 && PF07724:AAA domain (Cdc48 subfamily)|PF00004:ATPase family associated with various cellular activities (AAA)	AAA	NOT_CHANGE
PA5053	838.883	2496.29	2206.51	3961.18	2080.03	875.427	1847.23	2305.54	-0.319824	0.544711	0.739198	hslV	NC_002516.2	5692576	5693109	+	534	protein_coding	ATP-dependent protease peptidase subunit&&sp|A6VDH4|HSLV_PSEA7 ATP-dependent protease subunit HslV OS=Pseudomonas aeruginosa (strain PA7) OX=381754 GN=hslV PE=3 SV=1 && PF00227:Proteasome subunit	Proteasome	NOT_CHANGE
PA5052	1403.72	1204.63	1233.66	1310.59	1359.03	1827.57	1280.67	1499.06	-0.226907	0.263133	0.494635	PA5052	NC_002516.2	5691762	5692457	+	696	protein_coding	hypothetical protein&&-- && PF05036:Sporulation related domain	-	NOT_CHANGE
PA5051	6719.93	7445.84	6726.13	8369.97	8566.16	10685.9	6963.97	9207.34	-0.402829	0.0201246	0.104652	argS	NC_002516.2	5689964	5691727	+	1764	protein_coding	arginine--tRNA ligase&&sp|Q9HUC8|SYR_PSEAE Arginine--tRNA ligase OS=Pseudomonas aeruginosa (strain ATCC 15692 / DSM 22644 / CIP 104116 / JCM 14847 / LMG 12228 / 1C / PRS 101 / PAO1) OX=208964 GN=argS PE=3 SV=1 && PF05746:DALR anticodon binding domain|PF00750:tRNA synthetases class I (R)|PF03485:Arginyl tRNA synthetase N terminal domain	-	NOT_CHANGE
PA5050	626.944	501.604	506.09	333.812	406.278	423.526	544.879	387.872	0.490863	0.013365	0.080888	priA	NC_002516.2	5687496	5689715	+	2220	protein_coding	primosome assembly protein PriA&&sp|P17888|PRIA_ECOLI Primosomal protein N' OS=Escherichia coli (strain K12) OX=83333 GN=priA PE=1 SV=2 && PF18074:Primosomal protein N C-terminal domain|PF00270:DEAD/DEAH box helicase|PF18319:PriA DNA helicase Cys-rich region (CRR) domain|PF17764:3??? DNA-binding domain (3???BD)|PF00271:Helicase conserved C-terminal domain	DEAD	NOT_CHANGE
PA5049	1589.05	2234.24	2551.15	704.61	1604.13	1564.84	2124.81	1291.19	0.718704	0.0374554	0.154678	rpmE	NC_002516.2	5687105	5687320	-	216	protein_coding	50S ribosomal protein L31&&sp|B7V3E2|RL31_PSEA8 50S ribosomal protein L31 OS=Pseudomonas aeruginosa (strain LESB58) OX=557722 GN=rpmE PE=3 SV=1 && PF01197:Ribosomal protein L31	-	NOT_CHANGE
PA5048	368.675	327.558	331.183	126.128	270.852	297.414	342.472	231.465	0.566032	0.0817926	0.246282	PA5048	NC_002516.2	5686278	5687045	-	768	protein_coding	nuclease&&-- && PF00565:Staphylococcal nuclease homologue	-	NOT_CHANGE
PA5047	627.93	723.561	697.555	519.685	553.148	684.157	683.015	585.664	0.222374	0.236435	0.466278	PA5047	NC_002516.2	5684842	5686281	-	1440	protein_coding	hypothetical protein&&sp|Q3SZN3|OMA1_BOVIN Metalloendopeptidase OMA1, mitochondrial OS=Bos taurus OX=9913 GN=OMA1 PE=2 SV=2 && PF01435:Peptidase family M48	Peptidase_M48	NOT_CHANGE
PA5046	11708.9	12937.1	12538.4	3273.64	6637.78	9192.51	12394.8	6367.97	0.960865	0.00563909	0.0459135	PA5046	NC_002516.2	5683471	5684739	-	1269	protein_coding	malic enzyme&&sp|E1V8J1|MAEB_HALED NADP-dependent malic enzyme OS=Halomonas elongata (strain ATCC 33173 / DSM 2581 / NBRC 15536 / NCIMB 2198 / 1H9) OX=768066 GN=maeB PE=1 SV=1 && PF03949:Malic enzyme, NAD binding domain|PF00390:Malic enzyme, N-terminal domain	Malic_M	NOT_CHANGE
PA5045	2170.65	1891.04	2117.5	1933.65	2223.08	2069.29	2059.73	2075.34	-0.0109193	0.943301	0.970758	ponA	NC_002516.2	5680898	5683366	+	2469	protein_coding	penicillin-binding protein 1A&&sp|Q07806|PBPA_PSEAE Penicillin-binding protein 1A OS=Pseudomonas aeruginosa (strain ATCC 15692 / DSM 22644 / CIP 104116 / JCM 14847 / LMG 12228 / 1C / PRS 101 / PAO1) OX=208964 GN=mrcA PE=1 SV=2 && PF00912:Transglycosylase|PF00905:Penicillin binding protein transpeptidase domain|PF17092:Penicillin-binding protein OB-like domain	-	NOT_CHANGE
PA5044	10187.8	11608.3	10506.8	8076.93	11380.5	10084.8	10767.6	9847.41	0.128894	0.500326	0.707038	pilM	NC_002516.2	5679649	5680713	-	1065	protein_coding	type 4 fimbrial biogenesis protein PilM&&sp|G3XD28|PILM_PSEAE Type IV pilus inner membrane component PilM OS=Pseudomonas aeruginosa (strain ATCC 15692 / DSM 22644 / CIP 104116 / JCM 14847 / LMG 12228 / 1C / PRS 101 / PAO1) OX=208964 GN=pilM PE=1 SV=1 && PF11104:Type IV pilus assembly protein PilM;	-	NOT_CHANGE
PA5043	4198.36	4983.77	3936.94	2847.84	4691.27	4349.81	4373.02	3962.97	0.142095	0.558759	0.749276	pilN	NC_002516.2	5679053	5679649	-	597	protein_coding	type 4 fimbrial biogenesis protein PilN&&sp|G3XD30|PILN_PSEAE Type IV pilus inner membrane component PilN OS=Pseudomonas aeruginosa (strain ATCC 15692 / DSM 22644 / CIP 104116 / JCM 14847 / LMG 12228 / 1C / PRS 101 / PAO1) OX=208964 GN=pilN PE=1 SV=1 && PF05137:Fimbrial assembly protein (PilN)	-	NOT_CHANGE
PA5042	3868.13	4249.46	3508.47	2597.48	4172.45	3802.27	3875.35	3524.07	0.137135	0.551826	0.74309	pilO	NC_002516.2	5678433	5679056	-	624	protein_coding	type 4 fimbrial biogenesis protein PilO&&sp|G3XD51|PILO_PSEAE Type IV pilus inner membrane component PilO OS=Pseudomonas aeruginosa (strain ATCC 15692 / DSM 22644 / CIP 104116 / JCM 14847 / LMG 12228 / 1C / PRS 101 / PAO1) OX=208964 GN=pilO PE=1 SV=1 && PF04350:Pilus assembly protein, PilO	-	NOT_CHANGE
PA5041	3665.06	3450.61	3084.15	2374.62	3257.85	3311.49	3399.94	2981.32	0.189645	0.345669	0.578112	pilP	NC_002516.2	5677912	5678436	-	525	protein_coding	type 4 fimbrial biogenesis protein PilP&&sp|G3XCX7|PILP_PSEAE Type IV pilus inner membrane component PilP OS=Pseudomonas aeruginosa (strain ATCC 15692 / DSM 22644 / CIP 104116 / JCM 14847 / LMG 12228 / 1C / PRS 101 / PAO1) OX=208964 GN=pilP PE=1 SV=1 && PF04351:Pilus assembly protein, PilP	-	NOT_CHANGE
PA5040	21213.6	15284.7	13018.6	13664.5	13141.1	17182.8	16505.6	14662.8	0.17082	0.482825	0.694661	pilQ	NC_002516.2	5675714	5677858	-	2145	protein_coding	type 4 fimbrial biogenesis outer membrane protein PilQ&&sp|P34750|PILQ_PSEAE Fimbrial assembly protein PilQ OS=Pseudomonas aeruginosa (strain ATCC 15692 / DSM 22644 / CIP 104116 / JCM 14847 / LMG 12228 / 1C / PRS 101 / PAO1) OX=208964 GN=pilQ PE=1 SV=2 && PF11741:AMIN domain|PF03958:Bacterial type II/III secretion system short domain|PF07660:Secretin and TonB N terminus short domain|PF00263:Bacte…	-	NOT_CHANGE
PA5039	1940.96	1554.68	1589.68	1600.78	1532.6	1626.84	1695.11	1586.74	0.0953792	0.566056	0.75405	aroK	NC_002516.2	5675184	5675702	-	519	protein_coding	shikimate kinase&&sp|B7V3D2|AROK_PSEA8 Shikimate kinase OS=Pseudomonas aeruginosa (strain LESB58) OX=557722 GN=aroK PE=3 SV=1 && PF01202:Shikimate kinase	SKI	NOT_CHANGE
PA5038	2693.1	2589.18	2621.52	1984.86	2466.28	2523.29	2634.6	2324.81	0.180566	0.279605	0.512625	aroB	NC_002516.2	5674028	5675134	-	1107	protein_coding	3-dehydroquinate synthase&&sp|P34002|AROB_PSEAE 3-dehydroquinate synthase OS=Pseudomonas aeruginosa (strain ATCC 15692 / DSM 22644 / CIP 104116 / JCM 14847 / LMG 12228 / 1C / PRS 101 / PAO1) OX=208964 GN=aroB PE=3 SV=2 && PF01761:3-dehydroquinate synthase	-	NOT_CHANGE
PA5037	4050.49	3713.63	3680.28	2618.34	3281.69	3427.09	3814.8	3109.04	0.29522	0.0931469	0.269305	PA5037	NC_002516.2	5672366	5674021	-	1656	protein_coding	hypothetical protein&&-- && PF13401:AAA domain|PF05036:Sporulation related domain	-	NOT_CHANGE
PA5036	2404.27	2409.26	2422.81	2018.05	3371.34	2712.46	2412.12	2700.62	-0.162982	0.472826	0.686354	gltB	NC_002516.2	5667696	5672141	-	4446	protein_coding	glutamate synthase subunit alpha&&sp|E1V8I1|GLTB_HALED Glutamate synthase [NADPH] large chain OS=Halomonas elongata (strain ATCC 33173 / DSM 2581 / NBRC 15536 / NCIMB 2198 / 1H9) OX=768066 GN=gltB PE=1 SV=1 && PF01493:GXGXG motif|PF00310:Glutamine amidotransferases class-II|PF01645:Conserved region in glutamate synthase|PF04898:Glutamate synthase central domain	GATase_2	NOT_CHANGE
PA5035	765.936	1267.21	1114.64	1394.99	1635.6	1509.14	1049.26	1513.25	-0.528286	0.0240114	0.116881	gltD	NC_002516.2	5666234	5667667	-	1434	protein_coding	glutamate synthase subunit beta&&sp|E1V8I0|GLTD_HALED Glutamate synthase [NADPH] small chain OS=Halomonas elongata (strain ATCC 33173 / DSM 2581 / NBRC 15536 / NCIMB 2198 / 1H9) OX=768066 GN=gltD PE=1 SV=1 && PF07992:Pyridine nucleotide-disulphide oxidoreductase|PF14691:Dihydroprymidine dehydrogenase domain II, 4Fe-4S cluster	Pyr_redox_2	NOT_CHANGE
PA5034	816.21	631.649	750.337	424.852	540.75	940.585	732.732	635.396	0.206121	0.513104	0.716636	hemE	NC_002516.2	5664990	5666057	-	1068	protein_coding	uroporphyrinogen decarboxylase&&sp|P95458|DCUP_PSEAE Uroporphyrinogen decarboxylase OS=Pseudomonas aeruginosa (strain ATCC 15692 / DSM 22644 / CIP 104116 / JCM 14847 / LMG 12228 / 1C / PRS 101 / PAO1) OX=208964 GN=hemE PE=1 SV=2 && PF01208:Uroporphyrinogen decarboxylase (URO-D)	-	NOT_CHANGE
PA5033	85.7612	90.9341	82.7958	36.9849	62.9444	65.1578	86.497	55.0291	0.65534	0.0248311	0.118958	PA5033	NC_002516.2	5663889	5664869	+	981	protein_coding	hypothetical protein&&-- && -	-	NOT_CHANGE
PA5032	16.7579	10.7556	12.4194	24.6566	28.6111	18.9168	13.311	24.0615	-0.85724	0.0462856	0.176306	PA5032	NC_002516.2	5662742	5663815	+	1074	protein_coding	transcriptional regulator&&-- && PF12833:Helix-turn-helix domain|PF12625:Arabinose-binding domain of AraC transcription regulator, N-term	-	NOT_CHANGE
PA5031	24.644	21.5113	24.8388	32.2433	28.6111	22.0696	23.6647	27.6413	-0.228622	0.526509	0.724765	PA5031	NC_002516.2	5661701	5662630	-	930	protein_coding	short-chain dehydrogenase&&sp|Q8NBN7|RDH13_HUMAN Retinol dehydrogenase 13 OS=Homo sapiens OX=9606 GN=RDH13 PE=1 SV=2 && PF00106:short chain dehydrogenase	adh_short	NOT_CHANGE
PA5030	659.474	435.115	443.993	440.026	665.685	448.748	512.86	518.153	-0.01493	0.956145	0.978235	PA5030	NC_002516.2	5660357	5661673	+	1317	protein_coding	major facilitator superfamily transporter&&sp|P43531|YNFM_ECOLI Inner membrane transport protein YnfM OS=Escherichia coli (strain K12) OX=83333 GN=ynfM PE=1 SV=2 && PF07690:Major Facilitator Superfamily	MFS_1	NOT_CHANGE
PA5029	337.13	417.514	387.071	301.569	358.592	261.682	380.572	307.281	0.307889	0.136795	0.335792	PA5029	NC_002516.2	5659276	5660181	-	906	protein_coding	transcriptional regulator&&sp|P77559|YNFL_ECOLI Uncharacterized HTH-type transcriptional regulator YnfL OS=Escherichia coli (strain K12) OX=83333 GN=ynfL PE=3 SV=1 && PF00126:Bacterial regulatory helix-turn-helix protein, lysR family|PF03466:LysR substrate binding domain	LysR_substrate	NOT_CHANGE
PA5028	1084.34	972.897	1059.79	996.696	842.12	992.081	1039.01	943.632	0.138998	0.389923	0.614736	PA5028	NC_002516.2	5658418	5659185	-	768	protein_coding	hypothetical protein&&sp|Q60283|Y3524_METJA Uncharacterized protein MJECL24 OS=Methanocaldococcus jannaschii (strain ATCC 43067 / DSM 2661 / JAL-1 / JCM 10045 / NBRC 100440) OX=243232 GN=MJECL24 PE=3 SV=1 && PF13614:AAA domain	-	NOT_CHANGE
PA5027	8869.88	9536.34	8932.64	7694.76	8356.35	9106.33	9112.95	8385.81	0.120005	0.414153	0.637978	PA5027	NC_002516.2	5657581	5658396	+	816	protein_coding	hypothetical protein&&-- && PF00582:Universal stress protein family	Usp	NOT_CHANGE
PA5026	203.067	157.423	208.025	180.183	330.935	234.358	189.505	248.492	-0.391371	0.165142	0.37827	PA5026	NC_002516.2	5657016	5657468	+	453	protein_coding	hypothetical protein&&-- && PF14539:Domain of unknown function (DUF4442)	-	NOT_CHANGE
PA5025	1851.26	1405.08	1340.26	1125.67	1620.34	1983.11	1532.2	1576.37	-0.0408131	0.877823	0.941262	metY	NC_002516.2	5655648	5656925	+	1278	protein_coding	O-acetylhomoserine aminocarboxypropyltransferase&&sp|O13326|CYSD_SCHPO Homocysteine synthase OS=Schizosaccharomyces pombe (strain 972 / ATCC 24843) OX=284812 GN=met17 PE=1 SV=1 && PF01053:Cys/Met metabolism PLP-dependent enzyme	Cys_Met_Meta_PP	NOT_CHANGE
PA5024	45.345	41.067	37.2581	49.3132	66.7592	35.7317	41.2234	50.6014	-0.29854	0.366255	0.594675	PA5024	NC_002516.2	5654556	5655527	+	972	protein_coding	hypothetical protein&&sp|O34430|YTNM_BACSU Probable membrane transporter protein YtnM OS=Bacillus subtilis (strain 168) OX=224308 GN=ytnM PE=3 SV=1 && PF01925:Sulfite exporter TauE/SafE	-	NOT_CHANGE
PA5023	151.807	176.001	157.312	135.611	149.731	186.015	161.707	157.119	0.0433317	0.843338	0.924147	PA5023	NC_002516.2	5652945	5654405	+	1461	protein_coding	hypothetical protein&&sp|Q9HUE6|SELO_PSEAE Protein adenylyltransferase SelO OS=Pseudomonas aeruginosa (strain ATCC 15692 / DSM 22644 / CIP 104116 / JCM 14847 / LMG 12228 / 1C / PRS 101 / PAO1) OX=208964 GN=selO PE=3 SV=1 && PF02696:Uncharacterized ACR, YdiU/UPF0061 family	-	NOT_CHANGE
PA5022	1688.61	1278.94	1216.06	917.036	1186.41	1018.35	1394.54	1040.6	0.422413	0.0465691	0.177004	PA5022	NC_002516.2	5649522	5652878	+	3357	protein_coding	potassium efflux protein KefA&&sp|P77338|MSCK_ECOLI Mechanosensitive channel MscK OS=Escherichia coli (strain K12) OX=83333 GN=mscK PE=1 SV=1 && PF00924:Mechanosensitive ion channel|PF12794:Mechanosensitive ion channel inner membrane domain 1|PF12795:Mechanosensitive ion channel porin domain	-	NOT_CHANGE
PA5021	900	778.317	827.958	890.483	828.768	863.867	835.425	861.039	-0.0435677	0.774015	0.886571	PA5021	NC_002516.2	5647814	5649430	+	1617	protein_coding	sodium/hydrogen antiporter&&sp|Q9HUE8|NHAP2_PSEAE K(+)/H(+) antiporter NhaP2 OS=Pseudomonas aeruginosa (strain ATCC 15692 / DSM 22644 / CIP 104116 / JCM 14847 / LMG 12228 / 1C / PRS 101 / PAO1) OX=208964 GN=nhaP2 PE=3 SV=2 && PF00999:Sodium/hydrogen exchanger family|PF03471:Transporter associated domain|PF02080:TrkA-C domain	Na_H_Exchanger	NOT_CHANGE
PA5020	1034.06	1040.36	975.956	800.391	456.824	1321.02	1016.79	859.413	0.242938	0.49451	0.703081	PA5020	NC_002516.2	5645593	5647395	+	1803	protein_coding	acyl-CoA dehydrogenase&&sp|Q5LLW7|DMDC_RUEPO 3-methylmercaptopropionyl-CoA dehydrogenase OS=Ruegeria pomeroyi (strain ATCC 700808 / DSM 15171 / DSS-3) OX=246200 GN=dmdC PE=1 SV=1 && PF12806:Acetyl-CoA dehydrogenase C-terminal like|PF02770:Acyl-CoA dehydrogenase, middle domain|PF12418:Acyl-CoA dehydrogenase N terminal|PF00441:Acyl-CoA dehydrogenase, C-terminal domain|PF02771:Acyl-CoA dehydrogenase…	-	NOT_CHANGE
PA5019	680.175	952.363	911.789	983.419	824.953	1048.83	848.109	952.401	-0.167215	0.428816	0.648822	PA5019	NC_002516.2	5644454	5645290	-	837	protein_coding	hypothetical protein&&sp|P37634|RLMJ_ECOLI Ribosomal RNA large subunit methyltransferase J OS=Escherichia coli (strain K12) OX=83333 GN=rlmJ PE=1 SV=1 && PF04378:Ribosomal RNA large subunit methyltransferase D, RlmJ	-	NOT_CHANGE
PA5018	1815.77	1761.97	1807.02	1923.22	1565.98	1813.91	1794.92	1767.7	0.022069	0.887809	0.946797	msrA	NC_002516.2	5643803	5644450	+	648	protein_coding	peptide methionine sulfoxide reductase&&sp|Q9HUF1|MSRA_PSEAE Peptide methionine sulfoxide reductase MsrA OS=Pseudomonas aeruginosa (strain ATCC 15692 / DSM 22644 / CIP 104116 / JCM 14847 / LMG 12228 / 1C / PRS 101 / PAO1) OX=208964 GN=msrA PE=3 SV=1 && PF01625:Peptide methionine sulfoxide reductase	PMSR	NOT_CHANGE
PA5017	3034.17	2620.47	2516.99	2727.4	2595.03	3199.04	2723.88	2840.49	-0.0603536	0.729227	0.864816	PA5017	NC_002516.2	5641010	5643709	+	2700	protein_coding	hypothetical protein&&sp|Q9HYT3|Y3311_PSEAE Uncharacterized signaling protein PA3311 OS=Pseudomonas aeruginosa (strain ATCC 15692 / DSM 22644 / CIP 104116 / JCM 14847 / LMG 12228 / 1C / PRS 101 / PAO1) OX=208964 GN=PA3311 PE=3 SV=1 && PF13426:PAS domain|PF01590:GAF domain|PF00563:EAL domain|PF00990:Diguanylate cyclase, GGDEF domain	EAL	NOT_CHANGE
PA5016	30590.1	21888.7	19658.8	8114.87	19699.7	14459.8	24045.9	14091.4	0.770973	0.0237103	0.115829	aceF	NC_002516.2	5638949	5640592	+	1644	protein_coding	dihydrolipoamide acetyltransferase&&sp|Q59638|ODP2_PSEAE Dihydrolipoyllysine-residue acetyltransferase component of pyruvate dehydrogenase complex OS=Pseudomonas aeruginosa (strain ATCC 15692 / DSM 22644 / CIP 104116 / JCM 14847 / LMG 12228 / 1C / PRS 101 / PAO1) OX=208964 GN=aceF PE=2 SV=2 && PF00198:2-oxoacid dehydrogenases acyltransferase (catalytic domain)|PF02817:e3 binding domain|PF00364:Bi…	Biotin_lipoyl	NOT_CHANGE
PA5015	85213.1	62168.6	54847.1	26238.4	48678.9	41673.7	67409.6	38863.7	0.794533	0.00618328	0.0484872	aceE	NC_002516.2	5636156	5638804	+	2649	protein_coding	pyruvate dehydrogenase subunit E1&&sp|Q59637|ODP1_PSEAE Pyruvate dehydrogenase E1 component OS=Pseudomonas aeruginosa (strain ATCC 15692 / DSM 22644 / CIP 104116 / JCM 14847 / LMG 12228 / 1C / PRS 101 / PAO1) OX=208964 GN=aceE PE=3 SV=2 && PF00456:Transketolase, thiamine diphosphate binding domain|PF17831:Pyruvate dehydrogenase E1 component middle domain	-	NOT_CHANGE
PA5014	2860.68	2717.27	2768.49	2848.79	2821.05	3174.87	2782.14	2948.24	-0.0835663	0.550414	0.74231	glnE	NC_002516.2	5632926	5635874	-	2949	protein_coding	bifunctional glutamine-synthetase adenylyltransferase/deadenyltransferase&&sp|Q9HUF4|GLNE_PSEAE Bifunctional glutamine synthetase adenylyltransferase/adenylyl-removing enzyme OS=Pseudomonas aeruginosa (strain ATCC 15692 / DSM 22644 / CIP 104116 / JCM 14847 / LMG 12228 / 1C / PRS 101 / PAO1) OX=208964 GN=glnE PE=3 SV=1 && PF08335:GlnD PII-uridylyltransferase|PF03710:Glutamate-ammonia ligase adenyl…	-	NOT_CHANGE
PA5013	6028.91	5415.95	5579.4	2893.36	3851.05	4393.95	5674.76	3712.79	0.612136	0.00320806	0.0309828	ilvE	NC_002516.2	5631947	5632870	-	924	protein_coding	branched-chain amino acid aminotransferase&&sp|O86428|ILVE_PSEAE Branched-chain-amino-acid aminotransferase OS=Pseudomonas aeruginosa (strain ATCC 15692 / DSM 22644 / CIP 104116 / JCM 14847 / LMG 12228 / 1C / PRS 101 / PAO1) OX=208964 GN=ilvE PE=1 SV=2 && PF01063:Amino-transferase class IV	-	NOT_CHANGE
PA5012	1655.09	1266.23	1334.05	736.853	1089.13	1161.28	1418.46	995.754	0.510681	0.0334204	0.143826	waaF	NC_002516.2	5630850	5631887	-	1038	protein_coding	heptosyltransferase II&&sp|P37692|RFAF_ECOLI ADP-heptose--LPS heptosyltransferase 2 OS=Escherichia coli (strain K12) OX=83333 GN=rfaF PE=1 SV=1 && PF01075:Glycosyltransferase family 9 (heptosyltransferase)	-	NOT_CHANGE
PA5011	1375.14	947.474	1054.61	599.345	782.037	797.658	1125.74	726.347	0.632352	0.00530434	0.0439317	waaC	NC_002516.2	5629786	5630853	-	1068	protein_coding	heptosyltransferase I&&sp|P24173|RFAC_ECOLI Lipopolysaccharide heptosyltransferase 1 OS=Escherichia coli (strain K12) OX=83333 GN=rfaC PE=1 SV=1 && PF01075:Glycosyltransferase family 9 (heptosyltransferase)	-	NOT_CHANGE
PA5010	1870.97	1835.3	1749.06	1169.29	1351.4	1138.16	1818.45	1219.62	0.576166	0.000184714	0.00368548	waaG	NC_002516.2	5628668	5629789	-	1122	protein_coding	UDP-glucose:(heptosyl) LPS alpha 1%2C3-glucosyltransferase WaaG&&sp|P25740|RFAG_ECOLI Lipopolysaccharide core biosynthesis protein RfaG OS=Escherichia coli (strain K12) OX=83333 GN=rfaG PE=1 SV=1 && PF00534:Glycosyl transferases group 1	Glycos_transf_1	NOT_CHANGE
PA5009	735.378	712.806	736.883	388.816	522.629	417.22	728.355	442.888	0.717466	0.000111553	0.00246004	waaP	NC_002516.2	5627865	5628671	-	807	protein_coding	lipopolysaccharide kinase WaaP&&sp|Q9HUF7|RFAP_PSEAE Lipopolysaccharide core heptose(I) kinase RfaP OS=Pseudomonas aeruginosa (strain ATCC 15692 / DSM 22644 / CIP 104116 / JCM 14847 / LMG 12228 / 1C / PRS 101 / PAO1) OX=208964 GN=rfaP PE=1 SV=1 && PF06293:Lipopolysaccharide kinase (Kdo/WaaP) family	-	NOT_CHANGE
PA5008	946.331	1036.45	1004.93	619.26	675.222	647.375	995.906	647.286	0.621615	2.26e-05	0.000621621	PA5008	NC_002516.2	5627131	5627865	-	735	protein_coding	hypothetical protein&&-- && PF06293:Lipopolysaccharide kinase (Kdo/WaaP) family	-	NOT_CHANGE
PA5007	700.876	719.65	736.883	289.241	361.454	377.285	719.136	342.66	1.07007	2.95e-09	2.82e-07	PA5007	NC_002516.2	5626376	5627134	-	759	protein_coding	hypothetical protein&&-- && PF06293:Lipopolysaccharide kinase (Kdo/WaaP) family	-	UP
PA5006	1323.88	1262.32	1338.19	709.352	744.842	749.315	1308.13	734.503	0.832725	2.13e-09	2.14e-07	PA5006	NC_002516.2	5624901	5626379	-	1479	protein_coding	hypothetical protein&&-- && PF06293:Lipopolysaccharide kinase (Kdo/WaaP) family	-	NOT_CHANGE
PA5005	8837.35	6905.12	7078.01	4267.49	6092.26	6318.21	7606.83	5559.32	0.452425	0.0441594	0.171322	PA5005	NC_002516.2	5623040	5624797	-	1758	protein_coding	carbamoyl transferase&&sp|P74178|Y1178_SYNY3 Uncharacterized protein sll1178 OS=Synechocystis sp. (strain PCC 6803 / Kazusa) OX=1111708 GN=sll1178 PE=3 SV=1 && PF16861:Carbamoyltransferase C-terminus|PF02543:Carbamoyltransferase N-terminus	-	NOT_CHANGE
PA5004	3106.13	2540.29	2494.22	1200.59	2172.54	2116.58	2713.55	1829.9	0.568511	0.03569	0.149772	PA5004	NC_002516.2	5621920	5623056	-	1137	protein_coding	glycosyl transferase family protein&&sp|Q59002|Y1607_METJA Uncharacterized glycosyltransferase MJ1607 OS=Methanocaldococcus jannaschii (strain ATCC 43067 / DSM 2661 / JAL-1 / JCM 10045 / NBRC 100440) OX=243232 GN=MJ1607 PE=3 SV=1 && PF13439:Glycosyltransferase Family 4|PF00534:Glycosyl transferases group 1	Glycos_transf_1	NOT_CHANGE
PA5003	1279.52	1148.9	1170.53	426.749	908.879	806.065	1199.65	713.898	0.748984	0.010952	0.0710183	PA5003	NC_002516.2	5621030	5621926	-	897	protein_coding	hypothetical protein&&-- && PF07395:Mig-14	-	NOT_CHANGE
PA5002	1140.53	1139.12	1098.08	364.159	868.824	800.811	1125.91	677.931	0.732074	0.0235256	0.115134	PA5002	NC_002516.2	5619608	5621026	-	1419	protein_coding	hypothetical protein&&-- && PF02585:GlcNAc-PI de-N-acetylase	-	NOT_CHANGE
PA5001	1286.42	1786.41	1336.12	503.564	1120.6	927.974	1469.65	850.713	0.788841	0.0128308	0.0785276	PA5001	NC_002516.2	5618579	5619535	-	957	protein_coding	hypothetical protein&&-- && PF13524:Glycosyl transferases group 1	-	NOT_CHANGE
PA5000	2223.88	3234.51	2821.27	2092.97	2759.06	2068.24	2759.89	2306.76	0.25869	0.249232	0.479536	wapR	NC_002516.2	5617534	5618418	-	885	protein_coding	alpha-1%2C3-rhamnosyltransferase WapR&&sp|P22639|Y2836_NOSS1 Uncharacterized glycosyltransferase alr2836 OS=Nostoc sp. (strain PCC 7120 / SAG 25.82 / UTEX 2576) OX=103690 GN=alr2836 PE=3 SV=2 && PF00535:Glycosyl transferase family 2	Glycos_transf_2	NOT_CHANGE
PA4999	570.756	547.56	505.055	338.554	482.574	447.697	541.123	422.942	0.355853	0.081008	0.245026	waaL	NC_002516.2	5616310	5617515	+	1206	protein_coding	O-antigen ligase WaaL&&sp|Q9HUG6|PA99_PSEAE Putative lipopolysaccharide biosynthesis protein PA4999 OS=Pseudomonas aeruginosa (strain ATCC 15692 / DSM 22644 / CIP 104116 / JCM 14847 / LMG 12228 / 1C / PRS 101 / PAO1) OX=208964 GN=PA4999 PE=3 SV=1 && PF04932:O-Antigen ligase	-	NOT_CHANGE
PA4998	677.218	491.826	505.055	403.041	535.981	509.702	558.033	482.908	0.208865	0.348461	0.578856	PA4998	NC_002516.2	5615652	5616302	+	651	protein_coding	hypothetical protein&&-- && -	-	NOT_CHANGE
PA4997	2838.01	2387.75	2414.53	1382.67	1926.48	1988.36	2546.76	1765.84	0.52844	0.0117392	0.0740944	msbA	NC_002516.2	5613733	5615544	-	1812	protein_coding	transporter MsbA&&sp|Q9HUG8|MSBA_PSEAE ATP-dependent lipid A-core flippase OS=Pseudomonas aeruginosa (strain ATCC 15692 / DSM 22644 / CIP 104116 / JCM 14847 / LMG 12228 / 1C / PRS 101 / PAO1) OX=208964 GN=msbA PE=3 SV=1 && PF00005:ABC transporter|PF00664:ABC transporter transmembrane region	ABC_membrane	NOT_CHANGE
PA4996	4756.3	4657.19	4375.76	1937.44	2925.01	3526.93	4596.42	2796.46	0.717017	0.00407735	0.0364387	rfaE	NC_002516.2	5612268	5613692	-	1425	protein_coding	bifunctional heptose 7-phosphate kinase/heptose 1-phosphate adenyltransferase&&sp|Q9HUG9|HLDE_PSEAE Bifunctional protein HldE OS=Pseudomonas aeruginosa (strain ATCC 15692 / DSM 22644 / CIP 104116 / JCM 14847 / LMG 12228 / 1C / PRS 101 / PAO1) OX=208964 GN=hldE PE=3 SV=1 && PF00294:pfkB family carbohydrate kinase|PF01467:Cytidylyltransferase-like	PfkB	NOT_CHANGE
PA4995	214.896	220.98	196.64	108.11	144.009	126.112	210.839	126.077	0.742207	0.000384541	0.00629007	PA4995	NC_002516.2	5610851	5612140	-	1290	protein_coding	acyl-CoA dehydrogenase&&sp|P45867|ACDA_BACSU Acyl-CoA dehydrogenase OS=Bacillus subtilis (strain 168) OX=224308 GN=acdA PE=2 SV=1 && PF00441:Acyl-CoA dehydrogenase, C-terminal domain|PF02770:Acyl-CoA dehydrogenase, middle domain|PF02771:Acyl-CoA dehydrogenase, N-terminal domain	-	NOT_CHANGE
PA4994	161.665	158.401	145.928	147.94	152.593	110.348	155.331	136.96	0.179993	0.417374	0.640696	PA4994	NC_002516.2	5609594	5610802	-	1209	protein_coding	acyl-CoA dehydrogenase&&sp|P15651|ACADS_RAT Short-chain specific acyl-CoA dehydrogenase, mitochondrial OS=Rattus norvegicus OX=10116 GN=Acads PE=1 SV=2 && PF02770:Acyl-CoA dehydrogenase, middle domain|PF00441:Acyl-CoA dehydrogenase, C-terminal domain	-	NOT_CHANGE
PA4993	329.244	272.802	309.449	358.469	350.009	355.215	303.832	354.565	-0.222894	0.193765	0.415364	PA4993	NC_002516.2	5608649	5609569	+	921	protein_coding	hypothetical protein&&-- && -	-	NOT_CHANGE
PA4992	562.87	502.582	580.606	361.314	453.963	485.531	548.686	433.603	0.340001	0.0787389	0.240006	PA4992	NC_002516.2	5607668	5608480	+	813	protein_coding	hypothetical protein&&sp|P46905|YCCK_BACSU Uncharacterized oxidoreductase YccK OS=Bacillus subtilis (strain 168) OX=224308 GN=yccK PE=3 SV=2 && PF00248:Aldo/keto reductase family	Aldo_ket_red	NOT_CHANGE
PA4991	1156.3	947.474	894.195	750.13	793.481	906.955	999.322	816.855	0.291217	0.121066	0.312238	PA4991	NC_002516.2	5606496	5607671	+	1176	protein_coding	hypothetical protein&&sp|Q9HUH4|Y4991_PSEAE Probable FAD-dependent oxidoreductase PA4991 OS=Pseudomonas aeruginosa (strain ATCC 15692 / DSM 22644 / CIP 104116 / JCM 14847 / LMG 12228 / 1C / PRS 101 / PAO1) OX=208964 GN=PA4991 PE=1 SV=1 && PF01266:FAD dependent oxidoreductase	DAO	NOT_CHANGE
PA4990	24.644	30.3114	21.7339	48.3649	29.5648	50.4448	25.5631	42.7915	-0.739484	0.0407686	0.162542	PA4990	NC_002516.2	5606103	5606435	+	333	protein_coding	SMR multidrug efflux transporter&&sp|Q9HUH5|MTDTR_PSEAE Multidrug transporter PA4990 OS=Pseudomonas aeruginosa (strain ATCC 15692 / DSM 22644 / CIP 104116 / JCM 14847 / LMG 12228 / 1C / PRS 101 / PAO1) OX=208964 GN=PA4990 PE=1 SV=1 && PF00893:Small Multidrug Resistance protein	-	NOT_CHANGE
PA4989	125.192	148.623	135.578	124.231	160.222	122.959	136.464	135.804	0.00624239	0.977681	0.990144	PA4989	NC_002516.2	5605134	5606018	-	885	protein_coding	transcriptional regulator&&sp|P94403|BSDA_BACSU HTH-type transcriptional regulator BsdA OS=Bacillus subtilis (strain 168) OX=224308 GN=bsdA PE=3 SV=1 && PF03466:LysR substrate binding domain|PF00126:Bacterial regulatory helix-turn-helix protein, lysR family	LysR_substrate	NOT_CHANGE
PA4988	389.376	323.647	327.044	265.533	308.046	294.261	346.689	289.28	0.261446	0.155299	0.36502	waaA	NC_002516.2	5603821	5605098	-	1278	protein_coding	3-deoxy-D-manno-octulosonic acid transferase&&sp|P0AC77|KDTA_ECO57 3-deoxy-D-manno-octulosonic acid transferase OS=Escherichia coli O157:H7 OX=83334 GN=waaA PE=3 SV=1 && PF04413:3-Deoxy-D-manno-octulosonic-acid transferase (kdotransferase)	-	NOT_CHANGE
PA4987	143.921	115.379	155.242	127.076	128.75	139.774	138.181	131.867	0.0673582	0.758014	0.877768	PA4987	NC_002516.2	5603173	5603772	+	600	protein_coding	transcriptional regulator&&-- && PF07883:Cupin domain|PF01381:Helix-turn-helix	Cupin_2	NOT_CHANGE
PA4986	96.6046	151.557	113.844	311.053	249.87	160.793	120.669	240.572	-0.996141	0.00142878	0.0171423	PA4986	NC_002516.2	5601149	5603095	+	1947	protein_coding	oxidoreductase&&sp|A4J778|METRE_DESRM Metal reductase OS=Desulfotomaculum reducens (strain MI-1) OX=349161 GN=Dred_2421 PE=1 SV=1 && PF00724:NADH:flavin oxidoreductase / NADH oxidase family|PF07992:Pyridine nucleotide-disulphide oxidoreductase	Oxidored_FMN	NOT_CHANGE
PA4985	89.7043	132.001	111.774	244.669	236.518	131.367	111.16	204.185	-0.878426	0.00439562	0.0387083	PA4985	NC_002516.2	5599884	5600975	-	1092	protein_coding	hypothetical protein&&-- && PF13416:Bacterial extracellular solute-binding protein	-	NOT_CHANGE
PA4984	224.754	226.846	234.933	270.274	233.657	242.765	228.844	248.899	-0.121569	0.490717	0.700412	PA4984	NC_002516.2	5599160	5599807	-	648	protein_coding	transcriptional regulator&&-- && PF00440:Bacterial regulatory proteins, tetR family|PF13977:BetI-type transcriptional repressor, C-terminal	TetR_N	NOT_CHANGE
PA4983	224.754	203.379	238.038	340.451	300.417	234.358	222.057	291.742	-0.395	0.0698902	0.222367	PA4983	NC_002516.2	5598308	5599042	-	735	protein_coding	two-component response regulator&&sp|Q9HUI2|ARUR_PSEAE Transcriptional regulatory protein AruR OS=Pseudomonas aeruginosa (strain ATCC 15692 / DSM 22644 / CIP 104116 / JCM 14847 / LMG 12228 / 1C / PRS 101 / PAO1) OX=208964 GN=aruR PE=3 SV=1 && PF00486:Transcriptional regulatory protein, C terminal|PF00072:Response regulator receiver domain	Response_reg	NOT_CHANGE
PA4982	142.935	110.49	117.984	115.696	127.796	86.1765	123.803	109.89	0.170107	0.498469	0.705787	PA4982	NC_002516.2	5595279	5597531	-	2253	protein_coding	two-component sensor&&sp|Q9HUI3|ARUS_PSEAE Sensor histidine kinase AruS OS=Pseudomonas aeruginosa (strain ATCC 15692 / DSM 22644 / CIP 104116 / JCM 14847 / LMG 12228 / 1C / PRS 101 / PAO1) OX=208964 GN=aruS PE=3 SV=1 && PF00672:HAMP domain|PF00512:His Kinase A (phospho-acceptor) domain|PF00072:Response regulator receiver domain|PF17149:Periplasmic sensor domain found in signal transduction protei…	HATPase_c	NOT_CHANGE
PA4981	42.3877	53.7782	61.0619	86.2981	63.8981	52.5466	52.4093	67.581	-0.370283	0.229314	0.458207	PA4981	NC_002516.2	5593683	5595095	-	1413	protein_coding	amino acid permease&&sp|P39137|ROCE_BACSU Amino-acid permease RocE OS=Bacillus subtilis (strain 168) OX=224308 GN=rocE PE=2 SV=1 && PF00324:Amino acid permease	AA_permease	NOT_CHANGE
PA4980	52.2453	85.0673	79.691	127.076	126.843	47.292	72.3346	100.404	-0.475389	0.243631	0.474604	PA4980	NC_002516.2	5592633	5593424	-	792	protein_coding	enoyl-CoA hydratase&&sp|Q0AVM1|CRCH_SYNWW Crotonyl-CoA hydratase OS=Syntrophomonas wolfei subsp. wolfei (strain DSM 2245B / Goettingen) OX=335541 GN=Swol_1936 PE=1 SV=1 && PF00378:Enoyl-CoA hydratase/isomerase	ECH	NOT_CHANGE
PA4979	103.505	132.979	126.264	253.204	211.722	166.047	120.916	210.325	-0.799899	0.00119474	0.014824	PA4979	NC_002516.2	5591452	5592612	-	1161	protein_coding	acyl-CoA dehydrogenase&&sp|O34421|ACDC_BACSU Probable acyl-CoA dehydrogenase YngJ OS=Bacillus subtilis (strain 168) OX=224308 GN=yngJ PE=3 SV=1 && PF02771:Acyl-CoA dehydrogenase, N-terminal domain|PF02770:Acyl-CoA dehydrogenase, middle domain|PF00441:Acyl-CoA dehydrogenase, C-terminal domain	-	NOT_CHANGE
PA4978	193.209	223.913	193.535	302.518	262.268	204.932	203.552	256.573	-0.334839	0.134273	0.331879	PA4978	NC_002516.2	5589295	5591385	-	2091	protein_coding	hypothetical protein&&sp|Q58010|ACD_METJA Acetate--CoA ligase [ADP-forming] OS=Methanocaldococcus jannaschii (strain ATCC 43067 / DSM 2661 / JAL-1 / JCM 10045 / NBRC 100440) OX=243232 GN=MJ0590 PE=1 SV=1 && PF13549:ATP-grasp domain|PF13380:CoA binding domain|PF13607:Succinyl-CoA ligase like flavodoxin domain	-	NOT_CHANGE
PA4977	150.821	154.49	143.858	312.001	217.444	148.182	149.723	225.876	-0.594317	0.0466958	0.177004	aruI	NC_002516.2	5587574	5589253	-	1680	protein_coding	hypothetical protein&&sp|Q9HUI8|ARUI_PSEAE Probable 2-ketoarginine decarboxylase AruI OS=Pseudomonas aeruginosa (strain ATCC 15692 / DSM 22644 / CIP 104116 / JCM 14847 / LMG 12228 / 1C / PRS 101 / PAO1) OX=208964 GN=aruI PE=1 SV=1 && PF00205:Thiamine pyrophosphate enzyme, central domain|PF02776:Thiamine pyrophosphate enzyme, N-terminal TPP binding domain|PF02775:Thiamine pyrophosphate enzyme, C-t…	TPP_enzyme_N	NOT_CHANGE
PA4976	363.746	274.758	331.183	595.552	400.555	338.4	323.229	444.836	-0.461309	0.0862793	0.254861	aruH	NC_002516.2	5586370	5587551	-	1182	protein_coding	arginine:pyruvate transaminase AruH&&sp|Q9HUI9|ARUH_PSEAE Arginine--pyruvate transaminase AruH OS=Pseudomonas aeruginosa (strain ATCC 15692 / DSM 22644 / CIP 104116 / JCM 14847 / LMG 12228 / 1C / PRS 101 / PAO1) OX=208964 GN=aruH PE=1 SV=1 && PF00155:Aminotransferase class I and II	Aminotran_1_2	NOT_CHANGE
PA4975	183.352	153.512	182.151	319.588	168.806	186.015	173.005	224.803	-0.378654	0.199782	0.4231	PA4975	NC_002516.2	5585615	5586319	-	705	protein_coding	NAD(P)H quinone oxidoreductase&&sp|Q5RBB9|NQO2_PONAB Ribosyldihydronicotinamide dehydrogenase [quinone] OS=Pongo abelii OX=9601 GN=NQO2 PE=2 SV=3 && PF02525:Flavodoxin-like fold	Flavodoxin_2	NOT_CHANGE
PA4974	1592.99	1275.03	1352.68	1264.13	1470.61	1417.71	1406.9	1384.15	0.0235849	0.891425	0.947547	PA4974	NC_002516.2	5584101	5585549	+	1449	protein_coding	hypothetical protein&&sp|Q9K2Y1|TOLC_VIBCH Outer membrane protein TolC OS=Vibrio cholerae serotype O1 (strain ATCC 39315 / El Tor Inaba N16961) OX=243277 GN=tolC PE=1 SV=1 && PF02321:Outer membrane efflux protein	OEP	NOT_CHANGE
PA4973	737.349	964.096	840.378	1201.54	1510.67	1248.51	847.275	1320.24	-0.639929	0.000966907	0.012701	thiC	NC_002516.2	5581762	5583645	-	1884	protein_coding	thiamine biosynthesis protein ThiC&&sp|B7V362|THIC_PSEA8 Phosphomethylpyrimidine synthase OS=Pseudomonas aeruginosa (strain LESB58) OX=557722 GN=thiC PE=3 SV=1 && PF01964:Radical SAM ThiC family|PF13667:ThiC-associated domain	-	NOT_CHANGE
PA4972	1421.47	1174.32	1192.26	1123.77	1198.81	1432.42	1262.68	1251.67	0.0129021	0.944473	0.971402	PA4972	NC_002516.2	5580962	5581708	+	747	protein_coding	hypothetical protein&&-- && -	-	NOT_CHANGE
PA4971	1963.64	2327.13	2227.21	2916.12	2329.9	1966.3	2172.66	2404.1	-0.146164	0.482767	0.694661	aspP	NC_002516.2	5580102	5580719	-	618	protein_coding	adenosine diphosphate sugar pyrophosphatase&&sp|P83843|ADPP_ECO57 ADP-ribose pyrophosphatase OS=Escherichia coli O157:H7 OX=83334 GN=nudF PE=3 SV=1 && PF00293:NUDIX domain	NUDIX	NOT_CHANGE
PA4970	775.794	819.384	800.015	1052.65	887.898	741.959	798.398	894.168	-0.163789	0.394633	0.619472	PA4970	NC_002516.2	5579653	5580111	-	459	protein_coding	hypothetical protein&&-- && PF06853:Protein of unknown function (DUF1249)	-	NOT_CHANGE
PA4969	842.826	720.628	703.765	544.342	617.046	609.541	755.739	590.31	0.35665	0.0352239	0.148732	cpdA	NC_002516.2	5578681	5579499	-	819	protein_coding	cAMP phosphodiesterase&&sp|D4P095|CPDA_PSEAI 3',5'-cyclic adenosine monophosphate phosphodiesterase CpdA OS=Pseudomonas aeruginosa OX=287 GN=cpdA PE=1 SV=1 && PF00149:Calcineurin-like phosphoesterase	Metallophos	NOT_CHANGE
PA4968	1049.84	926.941	910.754	751.078	815.416	730.398	962.51	765.631	0.330066	0.0360343	0.150868	PA4968	NC_002516.2	5577929	5578549	-	621	protein_coding	hypothetical protein&&sp|P0A8Z9|YQIA_ECO57 Esterase YqiA OS=Escherichia coli O157:H7 OX=83334 GN=yqiA PE=3 SV=1 && PF05728:Uncharacterised protein family (UPF0227)	-	NOT_CHANGE
PA4967	5072.73	3996.21	3784.8	2473.25	3411.4	2900.57	4284.58	2928.41	0.549055	0.00951058	0.0640348	parE	NC_002516.2	5576028	5577917	-	1890	protein_coding	DNA topoisomerase IV subunit B&&sp|Q9HUJ8|PARE_PSEAE DNA topoisomerase 4 subunit B OS=Pseudomonas aeruginosa (strain ATCC 15692 / DSM 22644 / CIP 104116 / JCM 14847 / LMG 12228 / 1C / PRS 101 / PAO1) OX=208964 GN=parE PE=3 SV=1 && PF00204:DNA gyrase B|PF01751:Toprim domain|PF02518:Histidine kinase-, DNA gyrase B-, and HSP90-like ATPase|PF00986:DNA gyrase B subunit, carboxyl terminus	DNA_gyraseB	NOT_CHANGE
PA4966	1176.01	836.984	901.44	466.579	846.889	648.426	971.479	653.964	0.571003	0.0368376	0.152728	PA4966	NC_002516.2	5575015	5576028	-	1014	protein_coding	hypothetical protein&&-- && PF13449:Esterase-like activity of phytase	-	NOT_CHANGE
PA4965	444.578	392.092	326.009	270.274	390.065	253.275	387.56	304.538	0.347465	0.16214	0.374703	PA4965	NC_002516.2	5574494	5575018	-	525	protein_coding	hypothetical protein&&-- && PF13975:gag-polyprotein putative aspartyl protease	-	NOT_CHANGE
PA4964	4826.29	4402.97	4198.78	3031.81	3848.19	3093.95	4476.01	3324.65	0.428984	0.0144186	0.0850902	parC	NC_002516.2	5572222	5574486	-	2265	protein_coding	DNA topoisomerase IV subunit A&&sp|Q9HUK1|PARC_PSEAE DNA topoisomerase 4 subunit A OS=Pseudomonas aeruginosa (strain ATCC 15692 / DSM 22644 / CIP 104116 / JCM 14847 / LMG 12228 / 1C / PRS 101 / PAO1) OX=208964 GN=parC PE=3 SV=1 && PF00521:DNA gyrase/topoisomerase IV, subunit A	-	NOT_CHANGE
PA4963	1050.82	1001.25	1045.3	862.981	1109.16	1005.74	1032.46	992.627	0.0567854	0.737223	0.868623	PA4963	NC_002516.2	5571219	5571929	-	711	protein_coding	hypothetical protein&&-- && PF03886:ABC-type transport auxiliary lipoprotein component	-	NOT_CHANGE
PA4962	60.1314	48.8893	51.7474	38.8816	41.0092	35.7317	53.5894	38.5408	0.474299	0.0954711	0.272553	PA4962	NC_002516.2	5570625	5571161	+	537	protein_coding	hypothetical protein&&sp|P45570|YBCI_ECOLI Inner membrane protein YbcI OS=Escherichia coli (strain K12) OX=83333 GN=ybcI PE=1 SV=1 && PF04307:LexA-binding, inner membrane-associated putative hydrolase	-	NOT_CHANGE
PA4961	1757.61	1596.72	1490.33	1295.42	1415.3	1405.1	1614.89	1371.94	0.235338	0.124231	0.317246	PA4961	NC_002516.2	5569090	5570628	+	1539	protein_coding	hypothetical protein&&-- && PF10144:Bacterial virulence factor haemolysin	-	NOT_CHANGE
PA4960	2318.51	2059.22	2127.85	1298.27	1669.93	1895.88	2168.53	1621.36	0.419693	0.0361201	0.150995	PA4960	NC_002516.2	5567655	5568944	-	1290	protein_coding	phosphoserine phosphatase&&sp|Q9S281|SERB_STRCO Phosphoserine phosphatase OS=Streptomyces coelicolor (strain ATCC BAA-471 / A3(2) / M145) OX=100226 GN=SCO1808 PE=1 SV=1 && PF12710:haloacid dehalogenase-like hydrolase|PF13740:ACT domain	-	NOT_CHANGE
PA4959	3035.16	2415.13	2293.44	1597.94	2038.06	1923.21	2581.24	1853.07	0.478222	0.0159265	0.0904604	fimX	NC_002516.2	5565493	5567568	+	2076	protein_coding	protein FimX&&sp|O34311|YKOW_BACSU Signaling protein YkoW OS=Bacillus subtilis (strain 168) OX=224308 GN=ykoW PE=3 SV=2 && PF00990:Diguanylate cyclase, GGDEF domain|PF00989:PAS fold|PF00563:EAL domain	EAL	NOT_CHANGE
PA4958	2872.51	2835.58	2533.55	2566.18	2494.89	2733.48	2747.21	2598.18	0.0805755	0.578317	0.762214	fimW	NC_002516.2	5563605	5565428	+	1824	protein_coding	cyclic-di-GMP receptor FimW&&sp|Q9HUK7|FIMW_PSEAE Cyclic-di-GMP receptor FimW OS=Pseudomonas aeruginosa (strain ATCC 15692 / DSM 22644 / CIP 104116 / JCM 14847 / LMG 12228 / 1C / PRS 101 / PAO1) OX=208964 GN=fimW PE=1 SV=2 && -	-	NOT_CHANGE
PA4957	1052.79	940.63	896.265	536.755	848.796	874.376	963.229	753.309	0.354938	0.139465	0.340332	psd	NC_002516.2	5562418	5563287	+	870	protein_coding	phosphatidylserine decarboxylase&&sp|Q9HUK8|PSD_PSEAE Phosphatidylserine decarboxylase proenzyme OS=Pseudomonas aeruginosa (strain ATCC 15692 / DSM 22644 / CIP 104116 / JCM 14847 / LMG 12228 / 1C / PRS 101 / PAO1) OX=208964 GN=psd PE=3 SV=1 && PF02666:Phosphatidylserine decarboxylase	-	NOT_CHANGE
PA4956	525.411	437.07	483.321	405.886	444.426	481.327	481.934	443.88	0.119046	0.498025	0.705525	rhdA	NC_002516.2	5561599	5562414	+	816	protein_coding	thiosulfate:cyanide sulfurtransferase&&sp|Q9HUK9|THTR_PSEAE Thiosulfate sulfurtransferase OS=Pseudomonas aeruginosa (strain ATCC 15692 / DSM 22644 / CIP 104116 / JCM 14847 / LMG 12228 / 1C / PRS 101 / PAO1) OX=208964 GN=rhdA PE=1 SV=1 && PF00581:Rhodanese-like domain	Rhodanese	NOT_CHANGE
PA4955	880.285	751.917	900.405	852.55	761.055	864.918	844.202	826.174	0.0311517	0.85179	0.928419	PA4955	NC_002516.2	5560013	5561524	+	1512	protein_coding	hypothetical protein&&-- && PF08668:HDOD domain	-	NOT_CHANGE
PA4954	1978.42	1806.95	1791.5	2337.64	2005.64	2103.97	1858.95	2149.08	-0.209237	0.167502	0.380635	motA	NC_002516.2	5559021	5559872	-	852	protein_coding	flagellar motor protein MotA&&sp|P55891|MOTA_SALTY Motility protein A OS=Salmonella typhimurium (strain LT2 / SGSC1412 / ATCC 700720) OX=99287 GN=motA PE=3 SV=1 && PF01618:MotA/TolQ/ExbB proton channel family	-	NOT_CHANGE
PA4953	2301.75	1837.26	1824.61	1852.09	1963.68	2160.72	1987.87	1992.16	-0.00298093	0.986668	0.994519	motB	NC_002516.2	5557958	5559001	-	1044	protein_coding	flagellar motor protein MotB&&sp|P55892|MOTB_SALTY Motility protein B OS=Salmonella typhimurium (strain LT2 / SGSC1412 / ATCC 700720) OX=99287 GN=motB PE=1 SV=1 && PF13677:Membrane MotB of proton-channel complex MotA/MotB|PF00691:OmpA family	-	NOT_CHANGE
PA4952	721.577	661.961	682.031	461.837	566.5	562.249	688.523	530.195	0.377266	0.0272124	0.125294	PA4952	NC_002516.2	5556935	5557954	+	1020	protein_coding	ribosome-associated GTPase&&sp|Q9HUL3|RSGA_PSEAE Small ribosomal subunit biogenesis GTPase RsgA OS=Pseudomonas aeruginosa (strain ATCC 15692 / DSM 22644 / CIP 104116 / JCM 14847 / LMG 12228 / 1C / PRS 101 / PAO1) OX=208964 GN=rsgA PE=1 SV=1 && PF03193:RsgA GTPase	-	NOT_CHANGE
PA4951	1249.94	1274.05	1263.67	1362.75	1190.22	1182.3	1262.56	1245.09	0.0199662	0.892867	0.948444	orn	NC_002516.2	5556281	5556823	-	543	protein_coding	oligoribonuclease&&sp|Q02F67|ORN_PSEAB Oligoribonuclease OS=Pseudomonas aeruginosa (strain UCBPP-PA14) OX=208963 GN=orn PE=3 SV=1 && PF00929:Exonuclease	Exonuc_X-T	NOT_CHANGE
PA4950	727.492	848.718	746.198	469.424	560.778	548.587	774.136	526.263	0.557075	0.00123469	0.0151472	PA4950	NC_002516.2	5555162	5556247	+	1086	protein_coding	hypothetical protein&&sp|Q9HUL4|QUEG_PSEAE Epoxyqueuosine reductase OS=Pseudomonas aeruginosa (strain ATCC 15692 / DSM 22644 / CIP 104116 / JCM 14847 / LMG 12228 / 1C / PRS 101 / PAO1) OX=208964 GN=queG PE=3 SV=1 && PF08331:Domain of unknown function (DUF1730)|PF13484:4Fe-4S double cluster binding domain	-	NOT_CHANGE
PA4949	738.335	713.783	715.149	740.646	721	854.408	722.423	772.018	-0.0954086	0.545063	0.739289	PA4949	NC_002516.2	5553572	5555080	-	1509	protein_coding	hypothetical protein&&sp|Q83CM5|NNR_COXBU Bifunctional NAD(P)H-hydrate repair enzyme Nnr OS=Coxiella burnetii (strain RSA 493 / Nine Mile phase I) OX=227377 GN=nnr PE=3 SV=1 && PF03853:YjeF-related protein N-terminus|PF01256:Carbohydrate kinase	-	NOT_CHANGE
PA4948	276.999	291.38	249.422	278.809	406.278	385.692	272.6	356.926	-0.388249	0.0771594	0.237049	PA4948	NC_002516.2	5553117	5553584	-	468	protein_coding	hypothetical protein&&sp|P0AF68|TSAE_ECO57 tRNA threonylcarbamoyladenosine biosynthesis protein TsaE OS=Escherichia coli O157:H7 OX=83334 GN=tsaE PE=3 SV=1 && PF02367:Threonylcarbamoyl adenosine biosynthesis protein TsaE	-	NOT_CHANGE
PA4947	1956.74	2004.46	1795.63	1705.1	2054.28	1955.79	1918.94	1905.05	0.0105728	0.946831	0.972787	amiB	NC_002516.2	5551681	5553108	-	1428	protein_coding	N-acetylmuramoyl-L-alanine amidase&&sp|P63884|AMIC_ECOL6 N-acetylmuramoyl-L-alanine amidase AmiC OS=Escherichia coli O6:H1 (strain CFT073 / ATCC 700928 / UPEC) OX=199310 GN=amiC PE=3 SV=1 && PF01476:LysM domain|PF01520:N-acetylmuramoyl-L-alanine amidase|PF11741:AMIN domain	LysM	NOT_CHANGE
PA4946	3014.46	2880.56	3005.49	1698.46	2372.81	2323.61	2966.83	2131.63	0.477045	0.0131711	0.0800704	mutL	NC_002516.2	5549780	5551681	-	1902	protein_coding	DNA mismatch repair protein&&sp|B7V209|MUTL_PSEA8 DNA mismatch repair protein MutL OS=Pseudomonas aeruginosa (strain LESB58) OX=557722 GN=mutL PE=3 SV=1 && PF08676:MutL C terminal dimerisation domain|PF13589:Histidine kinase-, DNA gyrase B-, and HSP90-like ATPase|PF01119:DNA mismatch repair protein, C-terminal domain	-	NOT_CHANGE
PA4945	2626.07	2484.55	2486.98	2335.74	2671.32	2747.14	2532.53	2584.73	-0.0293483	0.843564	0.924153	miaA	NC_002516.2	5548751	5549722	-	972	protein_coding	tRNA delta(2)-isopentenylpyrophosphate transferase&&sp|B7V208|MIAA_PSEA8 tRNA dimethylallyltransferase OS=Pseudomonas aeruginosa (strain LESB58) OX=557722 GN=miaA PE=3 SV=1 && PF01715:IPP transferase	IPPT	NOT_CHANGE
PA4944	6735.71	8895.89	8115.03	11022.5	8131.28	6474.8	7915.54	8542.84	-0.11006	0.658705	0.818077	hfq	NC_002516.2	5548397	5548645	-	249	protein_coding	RNA-binding protein Hfq&&sp|A6VD57|HFQ_PSEA7 RNA-binding protein Hfq OS=Pseudomonas aeruginosa (strain PA7) OX=381754 GN=hfq PE=1 SV=1 && PF17209:Hfq protein	-	NOT_CHANGE
PA4943	10181.9	11198.6	10912.5	9542.11	8580.47	8350.71	10764.3	8824.43	0.286662	0.0461289	0.176306	PA4943	NC_002516.2	5547083	5548384	-	1302	protein_coding	GTP-binding protein&&sp|P25519|HFLX_ECOLI GTPase HflX OS=Escherichia coli (strain K12) OX=83333 GN=hflX PE=1 SV=3 && PF16360:GTP-binding GTPase Middle Region|PF13167:GTP-binding GTPase N-terminal|PF01926:50S ribosome-binding GTPase	-	NOT_CHANGE
PA4942	8165.06	7599.35	6658.86	5673.86	6453.71	5744.4	7474.42	5957.32	0.327302	0.0434995	0.169486	hflK	NC_002516.2	5545786	5546988	-	1203	protein_coding	protease subunit HflK&&sp|P44546|HFLK_HAEIN Protein HflK OS=Haemophilus influenzae (strain ATCC 51907 / DSM 11121 / KW20 / Rd) OX=71421 GN=hflK PE=3 SV=1 && PF12221:Bacterial membrane protein N terminal|PF01145:SPFH domain / Band 7 family	-	NOT_CHANGE
PA4941	5800.22	5013.11	4520.65	3794.27	4367.01	3499.61	5111.33	3886.96	0.395027	0.0314326	0.138299	hflC	NC_002516.2	5544917	5545786	-	870	protein_coding	protease subunit HflC&&sp|P44545|HFLC_HAEIN Protein HflC OS=Haemophilus influenzae (strain ATCC 51907 / DSM 11121 / KW20 / Rd) OX=71421 GN=hflC PE=3 SV=1 && PF01145:SPFH domain / Band 7 family	-	NOT_CHANGE
PA4940	438.664	348.092	417.084	266.481	363.361	320.534	401.28	316.792	0.341052	0.102376	0.28451	PA4940	NC_002516.2	5544636	5544821	-	186	protein_coding	hypothetical protein&&-- && PF09838:Uncharacterized protein conserved in bacteria (DUF2065)	-	NOT_CHANGE
PA4939	1988.28	1639.75	1772.87	873.413	1577.43	1666.78	1800.3	1372.54	0.391532	0.157527	0.368736	PA4939	NC_002516.2	5543417	5544601	-	1185	protein_coding	ATP phosphoribosyltransferase&&sp|B7V202|HISZ_PSEA8 ATP phosphoribosyltransferase regulatory subunit OS=Pseudomonas aeruginosa (strain LESB58) OX=557722 GN=hisZ PE=3 SV=1 && PF13393:Histidyl-tRNA synthetase	-	NOT_CHANGE
PA4938	5594.19	6623.52	6503.61	2662.91	5249.18	5492.17	6240.44	4468.09	0.482029	0.102587	0.284807	purA	NC_002516.2	5542073	5543365	-	1293	protein_coding	adenylosuccinate synthetase&&sp|B7V201|PURA_PSEA8 Adenylosuccinate synthetase OS=Pseudomonas aeruginosa (strain LESB58) OX=557722 GN=purA PE=3 SV=1 && PF00709:Adenylosuccinate synthetase	-	NOT_CHANGE
PA4937_2	37.4589	30.3114	36.2232	33.1916	47.6852	33.6298	34.6645	38.1689	-0.141302	0.664653	0.821877	PA4937_2	NC_002516.2	5541830	5541916	+	87	protein_coding	tRNA-Leu&&-- && -	-	NOT_CHANGE
PA4937_1	59.1457	50.8448	69.3415	46.4682	82.0185	25.2224	59.7773	51.2364	0.218324	0.603751	0.781519	PA4937_1	NC_002516.2	5541614	5541700	+	87	protein_coding	tRNA-Leu&&-- && -	-	NOT_CHANGE
PA4937	14665.2	14106.5	12972	12712.4	12098.7	12919.1	13914.6	12576.7	0.145856	0.28768	0.519538	rnr	NC_002516.2	5538696	5541410	-	2715	protein_coding	exoribonuclease R&&sp|P21499|RNR_ECOLI Ribonuclease R OS=Escherichia coli (strain K12) OX=83333 GN=rnr PE=1 SV=2 && PF00575:S1 RNA binding domain|PF08461:Ribonuclease R winged-helix domain|PF17876:Cold shock domain|PF08206:Ribonuclease B OB domain|PF00773:RNB domain	RNB	NOT_CHANGE
PA4936	2440.74	1798.15	1754.24	1534.4	1388.59	1563.79	1997.71	1495.59	0.41772	0.0363335	0.151489	PA4936	NC_002516.2	5537953	5538699	-	747	protein_coding	23S rRNA (guanosine(2251)-2'-O)-methyltransferase RlmB&&sp|Q9HUM8|RLMB_PSEAE 23S rRNA (guanosine-2'-O-)-methyltransferase RlmB OS=Pseudomonas aeruginosa (strain ATCC 15692 / DSM 22644 / CIP 104116 / JCM 14847 / LMG 12228 / 1C / PRS 101 / PAO1) OX=208964 GN=rlmB PE=3 SV=1 && PF00588:SpoU rRNA Methylase family|PF08032:RNA 2'-O ribose methyltransferase substrate binding	SpoU_methylase	NOT_CHANGE
PA4935	7769.77	15292.6	14664.2	3921.35	8517.53	10504.1	12575.5	7647.65	0.717547	0.0687403	0.220512	rpsF	NC_002516.2	5537319	5537738	-	420	protein_coding	30S ribosomal protein S6&&sp|A6VD48|RS6_PSEA7 30S ribosomal protein S6 OS=Pseudomonas aeruginosa (strain PA7) OX=381754 GN=rpsF PE=3 SV=1 && PF01250:Ribosomal protein S6	-	NOT_CHANGE
PA4934	3828.7	8173.31	8325.12	2243.75	4593.04	5383.93	6775.71	4073.57	0.734106	0.0626308	0.209222	rpsR	NC_002516.2	5537059	5537289	-	231	protein_coding	30S ribosomal protein S18&&sp|A6VD47|RS18_PSEA7 30S ribosomal protein S18 OS=Pseudomonas aeruginosa (strain PA7) OX=381754 GN=rpsR PE=3 SV=1 && PF01084:Ribosomal protein S18	-	NOT_CHANGE
PA4933	6691.35	15506.7	15616.3	3419.68	7156.59	10799.4	12604.8	7125.22	0.822987	0.0640137	0.212053	PA4933	NC_002516.2	5536153	5537022	-	870	protein_coding	hypothetical protein&&-- && -	-	NOT_CHANGE
PA4932	7297.59	15862.6	16843.8	4291.2	7861.38	10426.3	13334.7	7526.29	0.825187	0.0385933	0.157348	rplI	NC_002516.2	5535685	5536131	-	447	protein_coding	50S ribosomal protein L9&&sp|A6VD45|RL9_PSEA7 50S ribosomal protein L9 OS=Pseudomonas aeruginosa (strain PA7) OX=381754 GN=rplI PE=3 SV=1 && PF01281:Ribosomal protein L9, N-terminal domain|PF03948:Ribosomal protein L9, C-terminal domain	-	NOT_CHANGE
PA4931	1817.74	1879.3	1839.1	1351.37	1943.65	1822.32	1845.38	1705.78	0.113571	0.562593	0.751458	dnaB	NC_002516.2	5534162	5535556	-	1395	protein_coding	replicative DNA helicase&&sp|P0ACB0|DNAB_ECOLI Replicative DNA helicase OS=Escherichia coli (strain K12) OX=83333 GN=dnaB PE=1 SV=1 && PF00772:DnaB-like helicase N terminal domain|PF03796:DnaB-like helicase C terminal domain	DnaB_C	NOT_CHANGE
PA4930	444.578	402.848	443.993	295.879	360.5	364.674	430.473	340.351	0.339257	0.0589861	0.202074	alr	NC_002516.2	5533017	5534093	-	1077	protein_coding	biosynthetic alanine racemase&&sp|Q9HUN4|ALR1_PSEAE Alanine racemase, biosynthetic OS=Pseudomonas aeruginosa (strain ATCC 15692 / DSM 22644 / CIP 104116 / JCM 14847 / LMG 12228 / 1C / PRS 101 / PAO1) OX=208964 GN=alr PE=1 SV=1 && PF00842:Alanine racemase, C-terminal domain|PF01168:Alanine racemase, N-terminal domain	Ala_racemase_N	NOT_CHANGE
PA4929	244.469	215.113	180.081	256.998	234.611	239.613	213.221	243.74	-0.192543	0.339152	0.571231	PA4929	NC_002516.2	5530973	5533015	+	2043	protein_coding	hypothetical protein&&sp|Q9ABX9|Y091_CAUVC Uncharacterized signaling protein CC_0091 OS=Caulobacter vibrioides (strain ATCC 19089 / CB15) OX=190650 GN=CC_0091 PE=1 SV=1 && PF07696:7TMR-DISM extracellular 2|PF07695:7TM diverse intracellular signalling|PF00990:Diguanylate cyclase, GGDEF domain	GGDEF	NOT_CHANGE
PA4928	727.492	816.451	826.923	338.554	855.472	842.848	790.289	678.958	0.219256	0.526994	0.725075	PA4928	NC_002516.2	5528659	5530902	-	2244	protein_coding	hypothetical protein&&sp|Q9HUN6|Y4928_PSEAE UPF0313 protein PA4928 OS=Pseudomonas aeruginosa (strain ATCC 15692 / DSM 22644 / CIP 104116 / JCM 14847 / LMG 12228 / 1C / PRS 101 / PAO1) OX=208964 GN=PA4928 PE=3 SV=1 && PF08497:Radical SAM N-terminal|PF11842:Domain of unknown function (DUF3362)|PF04055:Radical SAM superfamily	Radical_SAM	NOT_CHANGE
PA4927	242.497	261.069	257.702	201.994	199.324	234.358	253.756	211.892	0.261057	0.150427	0.357295	PA4927	NC_002516.2	5525905	5528397	-	2493	protein_coding	hypothetical protein&&sp|P9WL96|Y2567_MYCTO Uncharacterized protein MT2643 OS=Mycobacterium tuberculosis (strain CDC 1551 / Oshkosh) OX=83331 GN=MT2643 PE=4 SV=1 && PF04168:A predicted alpha-helical domain with a conserved ER motif.|PF14403:Circularly permuted ATP-grasp type 2	-	NOT_CHANGE
PA4926	129.135	92.8896	103.495	111.903	109.676	94.5839	108.506	105.388	0.0410579	0.863262	0.932777	PA4926	NC_002516.2	5524970	5525905	-	936	protein_coding	hypothetical protein&&sp|P9WL92|Y2569_MYCTO Uncharacterized protein MT2645 OS=Mycobacterium tuberculosis (strain CDC 1551 / Oshkosh) OX=83331 GN=MT2645 PE=4 SV=1 && PF08379:Bacterial transglutaminase-like N-terminal region|PF01841:Transglutaminase-like superfamily	Transglut_core	NOT_CHANGE
PA4925	63.0887	71.3783	86.9356	130.87	93.4629	102.991	73.8009	109.108	-0.56578	0.0310168	0.136911	PA4925	NC_002516.2	5523868	5524719	-	852	protein_coding	hypothetical protein&&sp|Q89AB5|Y402_BUCBP Uncharacterized MscS family protein bbp_402 OS=Buchnera aphidicola subsp. Baizongia pistaciae (strain Bp) OX=224915 GN=bbp_402 PE=3 SV=1 && PF00924:Mechanosensitive ion channel	-	NOT_CHANGE
PA4924	329.244	371.558	388.106	304.414	373.852	358.368	362.969	345.545	0.0710419	0.699918	0.842531	PA4924	NC_002516.2	5522986	5523681	-	696	protein_coding	hypothetical protein&&sp|P45682|NLPD_PSEAE Lipoprotein NlpD/LppB homolog OS=Pseudomonas aeruginosa (strain ATCC 15692 / DSM 22644 / CIP 104116 / JCM 14847 / LMG 12228 / 1C / PRS 101 / PAO1) OX=208964 GN=PA3623 PE=3 SV=1 && PF01476:LysM domain|PF01551:Peptidase family M23	Peptidase_M23	NOT_CHANGE
PA4923	417.963	480.093	513.334	148.888	226.028	207.034	470.463	193.983	1.27852	1.98e-08	1.52e-06	PA4923	NC_002516.2	5522386	5522973	+	588	protein_coding	hypothetical protein&&sp|P48636|LOGH_PSEAE Cytokinin riboside 5'-monophosphate phosphoribohydrolase OS=Pseudomonas aeruginosa (strain ATCC 15692 / DSM 22644 / CIP 104116 / JCM 14847 / LMG 12228 / 1C / PRS 101 / PAO1) OX=208964 GN=PA4923 PE=1 SV=2 && PF03641:Possible lysine decarboxylase	-	UP
PA4922	30718.3	22181.1	24181.6	31117.6	21244.7	35615.1	25693.6	29325.8	-0.190751	0.45253	0.668727	azu	NC_002516.2	5521664	5522110	-	447	protein_coding	azurin&&sp|P00282|AZUR_PSEAE Azurin OS=Pseudomonas aeruginosa (strain ATCC 15692 / DSM 22644 / CIP 104116 / JCM 14847 / LMG 12228 / 1C / PRS 101 / PAO1) OX=208964 GN=azu PE=1 SV=2 && PF00127:Copper binding proteins, plastocyanin/azurin family	-	NOT_CHANGE
PA4921	1605.8	1002.23	993.55	1194.9	980.407	1311.56	1200.53	1162.29	0.0468652	0.856138	0.930189	PA4921	NC_002516.2	5520672	5521595	+	924	protein_coding	hypothetical protein&&-- && -	-	NOT_CHANGE
PA4920	15148.2	10911.1	9310.39	16019.2	9695.35	16731.9	11789.9	14148.8	-0.263115	0.363201	0.591437	nadE	NC_002516.2	5519711	5520538	+	828	protein_coding	NAD synthetase&&sp|B7V1Y3|NADE_PSEA8 NH(3)-dependent NAD(+) synthetase OS=Pseudomonas aeruginosa (strain LESB58) OX=557722 GN=nadE PE=3 SV=1 && PF02540:NAD synthase	NAD_synthase	NOT_CHANGE
PA4919	14260	13652.8	11167.1	15157.2	12934.1	18379.8	13026.6	15490.4	-0.249878	0.228608	0.457972	pncB1	NC_002516.2	5518483	5519682	+	1200	protein_coding	nicotinate phosphoribosyltransferase&&sp|Q9HUP4|PNCB1_PSEAE Nicotinate phosphoribosyltransferase 1 OS=Pseudomonas aeruginosa (strain ATCC 15692 / DSM 22644 / CIP 104116 / JCM 14847 / LMG 12228 / 1C / PRS 101 / PAO1) OX=208964 GN=pncB1 PE=3 SV=1 && PF04095:Nicotinate phosphoribosyltransferase (NAPRTase) family|PF17767:Nicotinate phosphoribosyltransferase (NAPRTase) N-terminal domain	-	NOT_CHANGE
PA4918	6710.08	8314.11	7279.82	5751.63	7045.01	8257.18	7434.67	7017.94	0.083267	0.683011	0.833228	PA4918	NC_002516.2	5517821	5518480	+	660	protein_coding	hypothetical protein&&sp|P53184|PNC1_YEAST Nicotinamidase OS=Saccharomyces cerevisiae (strain ATCC 204508 / S288c) OX=559292 GN=PNC1 PE=1 SV=1 && PF00857:Isochorismatase family	Isochorismatase	NOT_CHANGE
PA4917	2420.04	3207.14	2973.41	2756.8	3167.25	2389.82	2866.86	2771.29	0.0488295	0.807426	0.905271	PA4917	NC_002516.2	5517109	5517711	-	603	protein_coding	hypothetical protein&&-- && PF01467:Cytidylyltransferase-like	CTP_transf_2	NOT_CHANGE
PA4916	3217.52	3389	3032.4	3240.45	3349.41	3123.37	3212.98	3237.74	-0.0110804	0.935793	0.968142	PA4916	NC_002516.2	5516399	5517094	-	696	protein_coding	hypothetical protein&&-- && -	-	NOT_CHANGE
PA4915	655.531	743.117	746.198	1110.5	884.083	877.529	714.949	957.369	-0.421476	0.0207864	0.106413	PA4915	NC_002516.2	5514727	5516352	+	1626	protein_coding	chemotaxis transducer&&sp|Q9Z429|NAHY_PSEPU Methyl-accepting chemotaxis protein NahY OS=Pseudomonas putida OX=303 GN=nahY PE=4 SV=1 && PF00015:Methyl-accepting chemotaxis protein (MCP) signalling domain|PF12729:Four helix bundle sensory module for signal transduction|PF00672:HAMP domain	HAMP	NOT_CHANGE
PA4914	365.717	332.447	328.079	717.887	441.565	362.572	342.081	507.341	-0.569063	0.0462366	0.176306	PA4914	NC_002516.2	5513732	5514670	+	939	protein_coding	transcriptional regulator&&sp|P0A9F8|GCVA_ECO57 Glycine cleavage system transcriptional activator OS=Escherichia coli O157:H7 OX=83334 GN=gcvA PE=3 SV=1 && PF03466:LysR substrate binding domain|PF00126:Bacterial regulatory helix-turn-helix protein, lysR family	LysR_substrate	NOT_CHANGE
PA4913	782.694	1024.72	1011.14	2560.49	1619.39	1145.52	939.519	1775.13	-0.918097	0.00333924	0.0315231	PA4913	NC_002516.2	5511988	5513112	-	1125	protein_coding	ABC transporter&&sp|Q8FYS6|LIVB1_BRUSU Leu/Ile/Val-binding protein homolog 1 OS=Brucella suis biovar 1 (strain 1330) OX=204722 GN=BR1785 PE=3 SV=1 && PF13458:Periplasmic binding protein	-	NOT_CHANGE
PA4912	32.5301	23.4669	39.328	114.748	69.6204	42.0373	31.775	75.4686	-1.25195	0.00297687	0.0292162	PA4912	NC_002516.2	5510839	5511753	-	915	protein_coding	branched-chain amino acid ABC transporter&&sp|P0A2J2|LIVH_SALTI High-affinity branched-chain amino acid transport system permease protein LivH OS=Salmonella typhi OX=90370 GN=livH PE=3 SV=1 && PF02653:Branched-chain amino acid transport system / permease component	BPD_transp_2	DOWN
PA4911	38.4447	42.0448	27.9436	64.4865	48.6389	31.528	36.1444	48.2178	-0.41793	0.252166	0.482963	PA4911	NC_002516.2	5509551	5510828	-	1278	protein_coding	branched-chain amino acid ABC transporter permease&&sp|P21628|BRAE_PSEAE High-affinity branched-chain amino acid transport system permease protein BraE OS=Pseudomonas aeruginosa (strain ATCC 15692 / DSM 22644 / CIP 104116 / JCM 14847 / LMG 12228 / 1C / PRS 101 / PAO1) OX=208964 GN=braE PE=3 SV=1 && PF02653:Branched-chain amino acid transport system / permease component|PF11862:Domain of unknown f…	BPD_transp_2	NOT_CHANGE
PA4910	39.4304	50.8448	54.8522	109.058	48.6389	54.6485	48.3758	70.7818	-0.551349	0.146385	0.351569	PA4910	NC_002516.2	5508682	5509554	-	873	protein_coding	ABC transporter ATP-binding protein&&sp|P21629|BRAF_PSEAE High-affinity branched-chain amino acid transport ATP-binding protein BraF OS=Pseudomonas aeruginosa (strain ATCC 15692 / DSM 22644 / CIP 104116 / JCM 14847 / LMG 12228 / 1C / PRS 101 / PAO1) OX=208964 GN=braF PE=3 SV=1 && PF00005:ABC transporter|PF12399:Branched-chain amino acid ATP-binding cassette transporter	ABC_tran	NOT_CHANGE
PA4909	60.1314	49.8671	40.363	146.991	57.2222	48.3429	50.1205	84.1855	-0.749389	0.0953141	0.272247	PA4909	NC_002516.2	5507969	5508685	-	717	protein_coding	ABC transporter ATP-binding protein&&sp|P0A192|LIVF_SALTI High-affinity branched-chain amino acid transport ATP-binding protein LivF OS=Salmonella typhi OX=90370 GN=livF PE=3 SV=1 && PF00005:ABC transporter	ABC_tran	NOT_CHANGE
PA4908	48.3023	34.2225	32.0834	52.1582	39.1018	32.5789	38.2027	41.2797	-0.113782	0.738203	0.868652	PA4908	NC_002516.2	5506966	5507898	-	933	protein_coding	ornithine cyclodeaminase&&sp|A1B196|PY2CR_PARDP Delta(1)-pyrroline-2-carboxylate reductase OS=Paracoccus denitrificans (strain Pd 1222) OX=318586 GN=Pden_1185 PE=1 SV=1 && PF02423:Ornithine cyclodeaminase/mu-crystallin family	OCD_Mu_crystall	NOT_CHANGE
PA4907	1362.32	1168.45	1190.19	671.418	794.435	870.172	1240.32	778.675	0.67196	0.00021061	0.00402524	PA4907	NC_002516.2	5505848	5506609	-	762	protein_coding	short-chain dehydrogenase&&sp|Q1QU27|ISFD2_CHRSD Sulfoacetaldehyde reductase 2 OS=Chromohalobacter salexigens (strain ATCC BAA-138 / DSM 3043 / CIP 106854 / NCIMB 13768 / 1H11) OX=290398 GN=isfD2 PE=1 SV=1 && PF00106:short chain dehydrogenase	adh_short	NOT_CHANGE
PA4906	492.881	515.293	542.313	488.39	442.518	427.73	516.829	452.879	0.190105	0.235669	0.465441	PA4906	NC_002516.2	5505071	5505784	-	714	protein_coding	transcriptional regulator&&-- && PF00392:Bacterial regulatory proteins, gntR family|PF07729:FCD domain	FCD	NOT_CHANGE
PA4905	38.4447	27.378	33.1183	67.3315	27.6574	21.0187	32.9803	38.6692	-0.233518	0.619593	0.792421	vanB	NC_002516.2	5504121	5505074	+	954	protein_coding	vanillate O-demethylase&&sp|O05617|VANB_PSEUH Vanillate O-demethylase oxidoreductase OS=Pseudomonas sp. (strain HR199 / DSM 7063) OX=86003 GN=vanB PE=3 SV=1 && PF00111:2Fe-2S iron-sulfur cluster binding domain	Fer2	NOT_CHANGE
PA4904	39.4304	55.7338	43.4678	87.2464	55.3148	46.241	46.2107	62.9341	-0.447691	0.188439	0.407957	vanA	NC_002516.2	5503051	5504106	+	1056	protein_coding	vanillate O-demethylase oxygenase&&sp|O05616|VANA_PSEUH Vanillate O-demethylase oxygenase subunit OS=Pseudomonas sp. (strain HR199 / DSM 7063) OX=86003 GN=vanA PE=3 SV=1 && PF00355:Rieske [2Fe-2S] domain	-	NOT_CHANGE
PA4903	30.5586	26.4002	30.0135	36.0366	31.4722	21.0187	28.9908	29.5091	-0.0311358	0.930455	0.966289	PA4903	NC_002516.2	5501338	5502672	-	1335	protein_coding	major facilitator superfamily transporter&&sp|E8ZB61|GALT_PSEPU Gallate transporter OS=Pseudomonas putida OX=303 GN=galT PE=3 SV=1 && PF07690:Major Facilitator Superfamily	MFS_1	NOT_CHANGE
PA4902	86.747	109.512	116.949	122.335	126.843	109.297	104.403	119.491	-0.196304	0.3923	0.617411	PA4902	NC_002516.2	5500427	5501323	+	897	protein_coding	transcriptional regulator&&sp|Q52838|NODD1_RHILO Nodulation protein D 1 OS=Mesorhizobium japonicum (strain LMG 29417 / CECT 9101 / MAFF 303099) OX=266835 GN=nodD1 PE=3 SV=2 && PF03466:LysR substrate binding domain|PF00126:Bacterial regulatory helix-turn-helix protein, lysR family	LysR_substrate	NOT_CHANGE
PA4901	37.4589	29.3336	41.3979	53.1065	58.1759	46.241	36.0635	52.5078	-0.545406	0.0696927	0.222258	mdlC	NC_002516.2	5498740	5500326	-	1587	protein_coding	benzoylformate decarboxylase&&sp|Q9HUR2|MDLC_PSEAE Benzoylformate decarboxylase OS=Pseudomonas aeruginosa (strain ATCC 15692 / DSM 22644 / CIP 104116 / JCM 14847 / LMG 12228 / 1C / PRS 101 / PAO1) OX=208964 GN=mdlC PE=3 SV=1 && PF02775:Thiamine pyrophosphate enzyme, C-terminal TPP binding domain|PF02776:Thiamine pyrophosphate enzyme, N-terminal TPP binding domain|PF00205:Thiamine pyrophosphate en…	TPP_enzyme_N	NOT_CHANGE
PA4900	82.8039	54.756	55.8872	37.9332	50.5463	69.3616	64.4824	52.6137	0.297561	0.373643	0.601617	PA4900	NC_002516.2	5497313	5498653	-	1341	protein_coding	major facilitator superfamily transporter&&sp|O30513|BENK_ACIAD Benzoate transport protein OS=Acinetobacter baylyi (strain ATCC 33305 / BD413 / ADP1) OX=62977 GN=benK PE=3 SV=2 && PF07690:Major Facilitator Superfamily	MFS_1	NOT_CHANGE
PA4899	220.81	165.246	169.731	440.974	198.37	240.664	185.263	293.336	-0.663294	0.0473702	0.177818	PA4899	NC_002516.2	5495821	5497290	-	1470	protein_coding	aldehyde dehydrogenase&&sp|Q59702|PCHA_PSEPU 4-hydroxybenzaldehyde dehydrogenase (NADP(+)) OS=Pseudomonas putida OX=303 GN=pchA PE=1 SV=2 && PF00171:Aldehyde dehydrogenase family	Aldedh	NOT_CHANGE
PA4898	16.7579	26.4002	28.9785	30.3466	29.5648	25.2224	24.0456	28.3779	-0.242727	0.514148	0.717611	opdK	NC_002516.2	5494460	5495713	-	1254	protein_coding	vanillate porin OpdK&&sp|Q88JX6|GALP_PSEPK Porin-like protein GalP OS=Pseudomonas putida (strain ATCC 47054 / DSM 6125 / NCIMB 11950 / KT2440) OX=160488 GN=galP PE=3 SV=1 && PF03573:outer membrane porin, OprD family	-	NOT_CHANGE
PA4897	79.8466	80.1784	58.992	83.4531	70.5741	90.3802	73.0057	81.4691	-0.155607	0.549321	0.741718	PA4897	NC_002516.2	5491346	5494315	+	2970	protein_coding	hypothetical protein&&-- && PF07715:TonB-dependent Receptor Plug Domain|PF00593:TonB dependent receptor	TonB_dep_Rec	NOT_CHANGE
PA4896	15.7722	12.7112	25.8737	19.915	11.4444	10.5093	18.119	13.9562	0.368113	0.458107	0.673861	PA4896	NC_002516.2	5490645	5491181	-	537	protein_coding	RNA polymerase sigma factor&&sp|P23484|FECI_ECOLI Probable RNA polymerase sigma factor FecI OS=Escherichia coli (strain K12) OX=83333 GN=fecI PE=1 SV=3 && PF08281:Sigma-70, region 4|PF04542:Sigma-70 region 2	Sigma70_r4_2	NOT_CHANGE
PA4895	10.8434	18.5779	18.6291	0.948331	18.1204	10.5093	16.0168	9.85934	0.70085	0.332991	0.564666	PA4895	NC_002516.2	5489630	5490652	-	1023	protein_coding	transmembrane sensor&&sp|P23485|FECR_ECOLI Protein FecR OS=Escherichia coli (strain K12) OX=83333 GN=fecR PE=2 SV=1 && PF16220:Domain of unknown function (DUF4880)|PF04773:FecR protein	-	NOT_CHANGE
PA4894	112.377	92.8896	76.5862	24.6566	23.8426	80.9218	93.9508	43.1403	1.12895	0.0173867	0.096018	PA4894	NC_002516.2	5489041	5489613	+	573	protein_coding	hypothetical protein&&sp|P27650|HUPE_RHILV Protein HupE OS=Rhizobium leguminosarum bv. viciae OX=387 GN=hupE PE=3 SV=1 && PF04955:HupE / UreJ protein	-	NOT_CHANGE
PA4893	130.12	147.646	143.858	29.3983	51.5	91.4311	140.541	57.4431	1.29534	0.000690038	0.00981367	ureG	NC_002516.2	5488397	5489011	+	615	protein_coding	urease accessory protein UreG&&sp|B7V1V6|UREG_PSEA8 Urease accessory protein UreG OS=Pseudomonas aeruginosa (strain LESB58) OX=557722 GN=ureG PE=3 SV=1 && PF02492:CobW/HypB/UreG, nucleotide-binding domain	-	UP
PA4892	45.345	44.9781	60.027	18.9666	32.4259	35.7317	50.1167	29.0414	0.790135	0.0238107	0.116216	ureF	NC_002516.2	5487715	5488386	+	672	protein_coding	urease accessory protein UreF&&sp|B7V1V5|UREF_PSEA8 Urease accessory protein UreF OS=Pseudomonas aeruginosa (strain LESB58) OX=557722 GN=ureF PE=3 SV=1 && PF01730:UreF	-	NOT_CHANGE
PA4891	69.0033	85.0673	79.691	30.3466	38.1481	68.3106	77.9205	45.6018	0.778644	0.0253297	0.11987	ureE	NC_002516.2	5487215	5487718	+	504	protein_coding	urease accessory protein UreE&&sp|B7V1V4|UREE_PSEA8 Urease accessory protein UreE OS=Pseudomonas aeruginosa (strain LESB58) OX=557722 GN=ureE PE=3 SV=1 && PF02814:UreE urease accessory protein, N-terminal domain|PF05194:UreE urease accessory protein, C-terminal domain	-	NOT_CHANGE
PA4890	404.162	337.336	331.183	286.396	217.444	366.776	357.56	290.205	0.30216	0.223931	0.452096	desT	NC_002516.2	5486356	5486985	+	630	protein_coding	transcriptional regulator&&sp|A7FD11|FABR_YERP3 HTH-type transcriptional repressor FabR OS=Yersinia pseudotuberculosis serotype O:1b (strain IP 31758) OX=349747 GN=fabR PE=3 SV=1 && PF00440:Bacterial regulatory proteins, tetR family	TetR_N	NOT_CHANGE
PA4889	886.199	473.248	520.579	403.041	301.37	964.756	626.675	556.389	0.172106	0.696618	0.839857	PA4889	NC_002516.2	5485097	5486197	-	1101	protein_coding	oxidoreductase&&sp|P9WNE8|DESET_MYCTO NADPH oxidoreductase OS=Mycobacterium tuberculosis (strain CDC 1551 / Oshkosh) OX=83331 GN=MT3327 PE=3 SV=1 && PF00970:Oxidoreductase FAD-binding domain|PF00175:Oxidoreductase NAD-binding domain	NAD_binding_1	NOT_CHANGE
PA4888	943.373	517.249	522.649	276.913	236.518	650.527	661.09	387.986	0.769542	0.0672655	0.217465	desB	NC_002516.2	5483988	5485100	-	1113	protein_coding	acyl-CoA desaturase&&sp|P9WNZ2|DESA3_MYCTO NADPH-dependent stearoyl-CoA 9-desaturase OS=Mycobacterium tuberculosis (strain CDC 1551 / Oshkosh) OX=83331 GN=desA3 PE=3 SV=1 && PF00487:Fatty acid desaturase	-	NOT_CHANGE
PA4887	300.657	204.357	201.815	88.1948	130.657	201.779	235.61	140.21	0.750756	0.0274816	0.126009	PA4887	NC_002516.2	5482452	5483768	-	1317	protein_coding	major facilitator superfamily transporter&&-- && PF07690:Major Facilitator Superfamily|PF00083:Sugar (and other) transporter	MFS_1	NOT_CHANGE
PA4886	138.007	169.157	145.928	161.216	126.843	126.112	151.03	138.057	0.128909	0.560962	0.750568	PA4886	NC_002516.2	5481070	5482461	+	1392	protein_coding	two-component sensor&&sp|Q44007|CZCS_CUPMC Sensor protein CzcS OS=Cupriavidus metallidurans (strain ATCC 43123 / DSM 2839 / NBRC 102507 / CH34) OX=266264 GN=czcS PE=2 SV=2 && PF00512:His Kinase A (phospho-acceptor) domain|PF00672:HAMP domain|PF02518:Histidine kinase-, DNA gyrase B-, and HSP90-like ATPase	HATPase_c	NOT_CHANGE
PA4885	101.533	126.134	117.984	102.42	139.241	106.144	115.217	115.935	-0.0097585	0.967425	0.984045	irlR	NC_002516.2	5480402	5481091	+	690	protein_coding	two-component response regulator&&sp|I1WSZ4|IRLR_BURP2 Transcriptional activator protein IrlR OS=Burkholderia pseudomallei (strain 1026b) OX=884204 GN=irlR PE=3 SV=1 && PF00072:Response regulator receiver domain|PF00486:Transcriptional regulatory protein, C terminal	Trans_reg_C	NOT_CHANGE
PA4884	19.7152	23.4669	1.03495	30.3466	22.8889	26.2733	14.739	26.5029	-0.841875	0.213319	0.440967	PA4884	NC_002516.2	5479641	5480264	-	624	protein_coding	hypothetical protein&&-- && -	-	NOT_CHANGE
PA4883	13.8007	1.95557	5.17474	13.2766	3.81481	10.5093	6.97699	9.20026	-0.396672	0.613621	1	PA4883	NC_002516.2	5478973	5479587	-	615	protein_coding	hypothetical protein&&sp|G8QM62|YEDZ1_AZOOP Putative protein-methionine-sulfoxide reductase subunit YedZ1 OS=Azospira oryzae (strain ATCC BAA-33 / DSM 13638 / PS) OX=640081 GN=yedZ1 PE=2 SV=1 && PF01292:Prokaryotic cytochrome b561	Ni_hydr_CYTB	NOT_CHANGE
PA4882	21.6867	19.5557	24.8388	62.5898	33.3796	23.1205	22.0271	39.6967	-0.854803	0.0528575	0.18818	PA4882	NC_002516.2	5478209	5478976	-	768	protein_coding	hypothetical protein&&sp|G8QM63|YEDY1_AZOOP Putative protein-methionine-sulfoxide reductase subunit YedZ1 OS=Azospira oryzae (strain ATCC BAA-33 / DSM 13638 / PS) OX=640081 GN=yedY1 PE=2 SV=1 && PF00174:Oxidoreductase molybdopterin binding domain	-	NOT_CHANGE
PA4881	18.7295	15.6446	6.20969	17.07	17.1667	11.5603	13.5279	15.2656	-0.173397	0.738503	0.868745	PA4881	NC_002516.2	5477754	5478095	+	342	protein_coding	hypothetical protein&&-- && -	-	NOT_CHANGE
PA4880	894.085	1174.32	995.62	3722.2	1513.53	1376.72	1021.34	2204.15	-1.10983	0.00379864	0.0347447	PA4880	NC_002516.2	5476945	5477478	+	534	protein_coding	bacterioferritin&&sp|Q93PP9|BFR_DESDA Bacterioferritin OS=Desulfovibrio desulfuricans (strain ATCC 27774 / DSM 6949 / MB) OX=525146 GN=bfr PE=1 SV=1 && PF00210:Ferritin-like domain	Ferritin	DOWN
PA4879	746.221	847.74	781.386	1597.94	1017.6	960.553	791.782	1192.03	-0.590419	0.0170786	0.0952335	PA4879	NC_002516.2	5474580	5476649	-	2070	protein_coding	hypothetical protein&&sp|P37645|YHJG_ECOLI AsmA family protein YhjG OS=Escherichia coli (strain K12) OX=83333 GN=yhjG PE=3 SV=3 && PF05170:AsmA family	-	NOT_CHANGE
PA4878	409.091	434.137	458.482	624.002	467.315	431.933	433.903	507.75	-0.227312	0.279193	0.512625	PA4878	NC_002516.2	5473766	5474578	+	813	protein_coding	transcriptional regulator&&-- && PF13411:MerR HTH family regulatory protein|PF14526:Integron-associated effector binding protein	-	NOT_CHANGE
PA4877	147.864	158.401	134.543	396.402	217.444	164.996	146.936	259.614	-0.821859	0.0157936	0.089893	PA4877	NC_002516.2	5473212	5473619	-	408	protein_coding	hypothetical protein&&-- && PF07498:Rho termination factor, N-terminal domain	-	NOT_CHANGE
PA4876	458.379	551.471	570.256	1849.25	727.676	566.453	526.702	1047.79	-0.9925	0.016929	0.0946739	osmE	NC_002516.2	5472824	5473168	+	345	protein_coding	OsmE family transcriptional regulator&&-- && PF04355:SmpA / OmlA family	-	NOT_CHANGE
PA4875	111.391	159.379	133.508	187.77	144.009	161.844	134.759	164.541	-0.288066	0.224374	0.452486	PA4875	NC_002516.2	5472197	5472735	+	539	protein_coding	--&&-- && -	-	NOT_CHANGE
PA4874	846.769	813.518	819.679	1335.25	981.361	984.724	826.655	1100.44	-0.412907	0.0334565	0.143826	PA4874	NC_002516.2	5471626	5472042	-	417	protein_coding	hypothetical protein&&-- && PF07769:psiF repeat	-	NOT_CHANGE
PA4873	123.22	132.979	153.172	112.851	119.213	127.163	136.457	119.742	0.188598	0.372677	0.600761	PA4873	NC_002516.2	5470186	5471451	+	1266	protein_coding	heat-shock protein&&sp|P36928|YEGD_ECOLI Uncharacterized chaperone protein YegD OS=Escherichia coli (strain K12) OX=83333 GN=yegD PE=3 SV=2 && PF00012:Hsp70 protein	HSP70	NOT_CHANGE
PA4872	810.296	836.007	824.854	750.13	580.805	574.86	823.719	635.265	0.374474	0.0401268	0.161173	PA4872	NC_002516.2	5469115	5469978	-	864	protein_coding	hypothetical protein&&sp|B7V1T5|OADC_PSEA8 Oxaloacetate decarboxylase OS=Pseudomonas aeruginosa (strain LESB58) OX=557722 GN=PLES_52581 PE=3 SV=1 && PF13714:Phosphoenolpyruvate phosphomutase	-	NOT_CHANGE
PA4871	112.377	106.579	87.9706	78.7115	52.4537	108.246	102.309	79.8037	0.361792	0.247504	0.4779	PA4871	NC_002516.2	5468409	5469023	+	615	protein_coding	hypothetical protein&&-- && -	-	NOT_CHANGE
PA4870	45.345	100.712	100.39	76.8148	62.9444	36.7826	82.149	58.8473	0.478222	0.236178	0.465941	PA4870	NC_002516.2	5468017	5468283	-	267	protein_coding	hypothetical protein&&sp|P41039|YBII_ECOLI Uncharacterized protein YbiI OS=Escherichia coli (strain K12) OX=83333 GN=ybiI PE=1 SV=1 && PF01258:Prokaryotic dksA/traR C4-type zinc finger	zf-dskA_traR	NOT_CHANGE
PA4869	292.771	287.469	291.855	235.186	300.417	299.516	290.698	278.373	0.0630344	0.738934	0.868745	PA4869	NC_002516.2	5466790	5468007	+	1218	protein_coding	hypothetical protein&&-- && -	-	NOT_CHANGE
PA4868	796.495	567.116	470.901	342.347	383.389	421.424	611.504	382.387	0.67781	0.00657364	0.0504396	ureC	NC_002516.2	5464821	5466521	+	1701	protein_coding	urease subunit alpha&&sp|Q9HUU5|URE1_PSEAE Urease subunit alpha OS=Pseudomonas aeruginosa (strain ATCC 15692 / DSM 22644 / CIP 104116 / JCM 14847 / LMG 12228 / 1C / PRS 101 / PAO1) OX=208964 GN=ureC PE=3 SV=1 && PF00449:Urease alpha-subunit, N-terminal domain|PF01979:Amidohydrolase family	Amidohydro_1	NOT_CHANGE
PA4867	195.181	107.556	125.229	56.8999	85.8333	101.94	142.655	81.5579	0.80866	0.0151781	0.0874866	ureB	NC_002516.2	5464453	5464758	+	306	protein_coding	urease subunit beta&&sp|B7V1T0|URE2_PSEA8 Urease subunit beta OS=Pseudomonas aeruginosa (strain LESB58) OX=557722 GN=ureB PE=3 SV=1 && PF00699:Urease beta subunit	-	NOT_CHANGE
PA4866	232.64	144.712	158.347	73.9698	87.7407	114.552	178.566	92.0874	0.957607	0.00097358	0.0127478	PA4866	NC_002516.2	5463918	5464436	+	519	protein_coding	hypothetical protein&&sp|Q9HUU7|MDDA_PSEAE L-methionine sulfoximine/L-methionine sulfone acetyltransferase OS=Pseudomonas aeruginosa (strain ATCC 15692 / DSM 22644 / CIP 104116 / JCM 14847 / LMG 12228 / 1C / PRS 101 / PAO1) OX=208964 GN=pitA PE=1 SV=1 && PF13420:Acetyltransferase (GNAT) domain	-	NOT_CHANGE
PA4865	89.7043	57.6893	89.0055	35.0882	33.3796	42.0373	78.7997	36.8351	1.09867	0.000343651	0.00583136	ureA	NC_002516.2	5463607	5463909	+	303	protein_coding	urease subunit gamma&&sp|B7V1S8|URE3_PSEA8 Urease subunit gamma OS=Pseudomonas aeruginosa (strain LESB58) OX=557722 GN=ureA PE=3 SV=1 && PF00547:Urease, gamma subunit	-	UP
PA4864	183.352	125.157	146.963	125.18	94.4166	124.01	151.824	114.535	0.407289	0.105077	0.2876	ureD	NC_002516.2	5462763	5463605	+	843	protein_coding	urease accessory protein&&sp|Q9HUU9|URED_PSEAE Urease accessory protein UreD OS=Pseudomonas aeruginosa (strain ATCC 15692 / DSM 22644 / CIP 104116 / JCM 14847 / LMG 12228 / 1C / PRS 101 / PAO1) OX=208964 GN=ureD PE=3 SV=1 && PF01774:UreD urease accessory protein	-	NOT_CHANGE
PA4863	200.109	183.824	172.836	235.186	158.315	167.098	185.59	186.866	-0.0104278	0.964632	0.983134	PA4863	NC_002516.2	5462302	5462754	+	453	protein_coding	hypothetical protein&&-- && PF00583:Acetyltransferase (GNAT) family	Acetyltransf_1	NOT_CHANGE
PA4862	45.345	44.9781	52.7823	42.6749	49.5926	51.4957	47.7018	47.9211	-0.00623633	0.982208	0.991984	PA4862	NC_002516.2	5461520	5462218	+	699	protein_coding	ABC transporter ATP-binding protein&&sp|P21630|BRAG_PSEAE High-affinity branched-chain amino acid transport ATP-binding protein BraG OS=Pseudomonas aeruginosa (strain ATCC 15692 / DSM 22644 / CIP 104116 / JCM 14847 / LMG 12228 / 1C / PRS 101 / PAO1) OX=208964 GN=braG PE=3 SV=1 && PF00005:ABC transporter	ABC_tran	NOT_CHANGE
PA4861	12.8149	17.6001	8.27958	22.7599	16.213	16.8149	12.8982	18.5959	-0.525226	0.263163	0.494635	PA4861	NC_002516.2	5460526	5461383	+	858	protein_coding	ABC transporter ATP-binding protein&&sp|P0A9S8|LIVG_ECO57 High-affinity branched-chain amino acid transport ATP-binding protein LivG OS=Escherichia coli O157:H7 OX=83334 GN=livG PE=3 SV=1 && PF00005:ABC transporter|PF12399:Branched-chain amino acid ATP-binding cassette transporter	ABC_tran	NOT_CHANGE
PA4860	6.90033	4.88893	17.5941	17.07	10.4907	6.3056	9.79446	11.2888	-0.217865	0.739796	1	PA4860	NC_002516.2	5459450	5460529	+	1080	protein_coding	ABC transporter permease&&-- && PF02653:Branched-chain amino acid transport system / permease component	BPD_transp_2	NOT_CHANGE
PA4859	22.6725	10.7556	11.3844	15.1733	11.4444	6.3056	14.9375	10.9744	0.438174	0.427855	0.648652	PA4859	NC_002516.2	5457864	5459453	+	1590	protein_coding	ABC transporter permease&&sp|P0A2J2|LIVH_SALTI High-affinity branched-chain amino acid transport system permease protein LivH OS=Salmonella typhi OX=90370 GN=livH PE=3 SV=1 && PF02653:Branched-chain amino acid transport system / permease component	BPD_transp_2	NOT_CHANGE
PA4858	22.6725	14.6668	23.8038	24.6566	17.1667	25.2224	20.381	22.3486	-0.132812	0.744056	0.870449	PA4858	NC_002516.2	5456452	5457717	+	1266	protein_coding	hypothetical protein&&sp|Q8YBN1|LIVB7_BRUME Leu/Ile/Val-binding protein homolog 7 OS=Brucella melitensis biotype 1 (strain 16M / ATCC 23456 / NCTC 10094) OX=224914 GN=BMEII0868 PE=3 SV=2 && PF13433:Periplasmic binding protein domain	-	NOT_CHANGE
PA4857	36.4732	32.2669	25.8737	44.5716	41.963	26.2733	31.5379	37.6026	-0.256682	0.465518	0.679829	PA4857	NC_002516.2	5455434	5456027	+	594	protein_coding	hypothetical protein&&sp|P57355|Y267_BUCAI UPF0056 membrane protein BU267 OS=Buchnera aphidicola subsp. Acyrthosiphon pisum (strain APS) OX=107806 GN=BU267 PE=3 SV=1 && PF01914:MarC family integral membrane protein	-	NOT_CHANGE
PA4856	1738.88	1693.52	1711.8	1358.01	1799.64	1697.26	1714.74	1618.3	0.0835816	0.633522	0.801138	retS	NC_002516.2	5452150	5454978	+	2829	protein_coding	sensor histidine kinase MifS&&sp|P48027|GACS_PSESY Sensor protein GacS OS=Pseudomonas syringae pv. syringae OX=321 GN=gacS PE=3 SV=1 && PF00512:His Kinase A (phospho-acceptor) domain|PF02518:Histidine kinase-, DNA gyrase B-, and HSP90-like ATPase|PF07696:7TMR-DISM extracellular 2|PF07695:7TM diverse intracellular signalling|PF00072:Response regulator receiver domain	7TMR-DISM_7TM	NOT_CHANGE
PA4855	1238.12	2181.44	1958.12	266.481	1331.37	1150.77	1792.56	916.207	0.968353	0.0519001	0.186847	purD	NC_002516.2	5450757	5452046	+	1290	protein_coding	phosphoribosylamine--glycine ligase&&sp|Q9HUV8|PUR2_PSEAE Phosphoribosylamine--glycine ligase OS=Pseudomonas aeruginosa (strain ATCC 15692 / DSM 22644 / CIP 104116 / JCM 14847 / LMG 12228 / 1C / PRS 101 / PAO1) OX=208964 GN=purD PE=3 SV=1 && PF01071:Phosphoribosylglycinamide synthetase, ATP-grasp (A) domain|PF02844:Phosphoribosylglycinamide synthetase, N domain|PF02843:Phosphoribosylglycinamide s…	-	NOT_CHANGE
PA4854	1667.91	2352.55	1956.05	360.366	1465.84	1267.42	1992.17	1031.21	0.950089	0.0323067	0.140408	purH	NC_002516.2	5449046	5450653	+	1608	protein_coding	bifunctional phosphoribosylaminoimidazolecarboxamide formyltransferase/IMP cyclohydrolase&&sp|B7V1R6|PUR9_PSEA8 Bifunctional purine biosynthesis protein PurH OS=Pseudomonas aeruginosa (strain LESB58) OX=557722 GN=purH PE=3 SV=1 && PF02142:MGS-like domain|PF01808:AICARFT/IMPCHase bienzyme	-	NOT_CHANGE
PA4853	402.191	414.581	381.896	123.283	463.5	303.72	399.556	296.834	0.428835	0.297106	0.529733	fis	NC_002516.2	5448643	5448966	+	324	protein_coding	Fis family transcriptional regulator&&sp|Q9HUW0|FISL_PSEAE Putative Fis-like DNA-binding protein OS=Pseudomonas aeruginosa (strain ATCC 15692 / DSM 22644 / CIP 104116 / JCM 14847 / LMG 12228 / 1C / PRS 101 / PAO1) OX=208964 GN=PA4853 PE=1 SV=2 && PF02954:Bacterial regulatory protein, Fis family	HTH_8	NOT_CHANGE
PA4852	1312.05	1507.75	1463.42	679.005	1431.51	1452.39	1427.74	1187.63	0.265778	0.386167	0.612002	PA4852	NC_002516.2	5447648	5448646	+	999	protein_coding	hypothetical protein&&sp|Q9HUW1|DUSB_PSEAE tRNA-dihydrouridine synthase B OS=Pseudomonas aeruginosa (strain ATCC 15692 / DSM 22644 / CIP 104116 / JCM 14847 / LMG 12228 / 1C / PRS 101 / PAO1) OX=208964 GN=dusB PE=3 SV=1 && PF01207:Dihydrouridine synthase (Dus)	Dus	NOT_CHANGE
PA4851	1157.28	859.473	961.467	696.075	953.703	860.714	992.741	836.831	0.246554	0.245227	0.475968	PA4851	NC_002516.2	5446179	5447444	+	1266	protein_coding	hypothetical protein&&-- && PF11906:Protein of unknown function (DUF3426)|PF13719:zinc-ribbon domain	-	NOT_CHANGE
PA4850	690.033	585.694	652.017	415.369	475.898	597.981	642.581	496.416	0.372942	0.0712473	0.224846	prmA	NC_002516.2	5445199	5446083	+	885	protein_coding	50S ribosomal protein L11 methyltransferase&&sp|B7V1R2|PRMA_PSEA8 Ribosomal protein L11 methyltransferase OS=Pseudomonas aeruginosa (strain LESB58) OX=557722 GN=prmA PE=3 SV=1 && PF06325:Ribosomal protein L11 methyltransferase (PrmA)	-	NOT_CHANGE
PA4849	57.1741	68.445	41.3979	25.6049	41.0092	55.6994	55.6723	40.7712	0.455044	0.219196	0.446507	PA4849	NC_002516.2	5444252	5445118	+	867	protein_coding	hypothetical protein&&-- && PF07264:Etoposide-induced protein 2.4 (EI24)	-	NOT_CHANGE
PA4848	8386.85	9437.59	8874.68	2129	4217.28	5885.22	8899.71	4077.17	1.12625	0.00105736	0.0136156	accC	NC_002516.2	5442792	5444141	+	1350	protein_coding	acetyl-CoA carboxylase biotin carboxylase subunit&&sp|P37798|ACCC_PSEAE Biotin carboxylase OS=Pseudomonas aeruginosa (strain ATCC 15692 / DSM 22644 / CIP 104116 / JCM 14847 / LMG 12228 / 1C / PRS 101 / PAO1) OX=208964 GN=accC PE=1 SV=1 && PF02786:Carbamoyl-phosphate synthase L chain, ATP binding domain|PF00289:Biotin carboxylase, N-terminal domain|PF02785:Biotin carboxylase C-terminal domain	CPSase_L_D2	UP
PA4847	3902.63	4152.65	4028.02	1172.14	1914.08	2593.7	4027.77	1893.31	1.08923	0.000201572	0.00389348	accB	NC_002516.2	5442304	5442774	+	471	protein_coding	acetyl-CoA carboxylase biotin carboxyl carrier protein subunit&&sp|P37799|BCCP_PSEAE Biotin carboxyl carrier protein of acetyl-CoA carboxylase OS=Pseudomonas aeruginosa (strain ATCC 15692 / DSM 22644 / CIP 104116 / JCM 14847 / LMG 12228 / 1C / PRS 101 / PAO1) OX=208964 GN=accB PE=3 SV=1 && PF00364:Biotin-requiring enzyme	Biotin_lipoyl	UP
PA4846	849.726	794.94	718.254	458.044	527.398	561.198	787.64	515.547	0.61194	0.000468909	0.0073654	aroQ1	NC_002516.2	5441837	5442280	+	444	protein_coding	3-dehydroquinate dehydratase&&sp|O30557|AROQ1_PSEAE 3-dehydroquinate dehydratase 1 OS=Pseudomonas aeruginosa (strain ATCC 15692 / DSM 22644 / CIP 104116 / JCM 14847 / LMG 12228 / 1C / PRS 101 / PAO1) OX=208964 GN=aroQ1 PE=1 SV=1 && PF01220:Dehydroquinase class II	-	NOT_CHANGE
PA4845	425.849	376.447	482.286	267.429	481.62	410.915	428.194	386.655	0.147249	0.578325	0.762214	dipZ	NC_002516.2	5439918	5441693	+	1776	protein_coding	thiol:disulfide interchange protein&&sp|Q9HUW5|DSBD1_PSEAE Thiol:disulfide interchange protein DsbD 1 OS=Pseudomonas aeruginosa (strain ATCC 15692 / DSM 22644 / CIP 104116 / JCM 14847 / LMG 12228 / 1C / PRS 101 / PAO1) OX=208964 GN=dsbD1 PE=3 SV=1 && PF02683:Cytochrome C biogenesis protein transmembrane region|PF13899:Thioredoxin-like|PF11412:Disulphide bond corrector protein DsbC	-	NOT_CHANGE
PA4844	255.312	243.469	208.025	579.43	1573.61	482.378	235.602	878.473	-1.89873	8.08e-06	0.000262128	PA4844	NC_002516.2	5437785	5439758	+	1974	protein_coding	chemotaxis transducer&&sp|Q9HUW6|CTPL_PSEAE Methyl-accepting chemotaxis protein CtpL OS=Pseudomonas aeruginosa (strain ATCC 15692 / DSM 22644 / CIP 104116 / JCM 14847 / LMG 12228 / 1C / PRS 101 / PAO1) OX=208964 GN=ctpL PE=1 SV=1 && PF00015:Methyl-accepting chemotaxis protein (MCP) signalling domain	-	DOWN
PA4843	7023.55	7718.64	7516.83	8026.67	7919.55	9042.23	7419.67	8329.48	-0.166841	0.249165	0.479536	PA4843	NC_002516.2	5436079	5437707	+	1629	protein_coding	two-component response regulator&&sp|P45365|YPH5_THIVI Uncharacterized 76.5 kDa protein in phbC 3'region OS=Thiocystis violacea OX=13725 PE=3 SV=1 && PF00072:Response regulator receiver domain|PF00990:Diguanylate cyclase, GGDEF domain	GGDEF	NOT_CHANGE
PA4842	4364.95	4897.73	4579.64	7580.01	5218.67	4922.57	4614.11	5907.08	-0.356432	0.107556	0.290338	PA4842	NC_002516.2	5434656	5435726	-	1071	protein_coding	hypothetical protein&&-- && PF10095:Uncharacterized protein conserved in bacteria (DUF2333)	-	NOT_CHANGE
PA4841	778.751	792.006	728.603	1069.72	860.241	844.95	766.454	924.969	-0.271348	0.122849	0.314676	PA4841	NC_002516.2	5434116	5434652	-	537	protein_coding	hypothetical protein&&sp|Q9HUW9|Y4841_PSEAE Uncharacterized Nudix hydrolase PA4841 OS=Pseudomonas aeruginosa (strain ATCC 15692 / DSM 22644 / CIP 104116 / JCM 14847 / LMG 12228 / 1C / PRS 101 / PAO1) OX=208964 GN=PA4841 PE=3 SV=2 && PF00293:NUDIX domain	NUDIX	NOT_CHANGE
PA4840	128.149	116.356	142.823	117.593	137.333	147.131	129.109	134.019	-0.0534232	0.80587	0.90517	PA4840	NC_002516.2	5433541	5433912	-	372	protein_coding	translation initiation factor Sui1&&sp|P45116|Y1225_HAEIN Uncharacterized protein HI_1225 OS=Haemophilus influenzae (strain ATCC 51907 / DSM 11121 / KW20 / Rd) OX=71421 GN=HI_1225 PE=3 SV=1 && PF01253:Translation initiation factor SUI1	SUI1	NOT_CHANGE
PA4839	954.217	1038.41	1137.41	685.643	1166.38	987.877	1043.34	946.633	0.140358	0.560745	0.750568	speA	NC_002516.2	5431381	5433291	-	1911	protein_coding	arginine decarboxylase&&sp|Q9HUX1|SPEA_PSEAE Biosynthetic arginine decarboxylase OS=Pseudomonas aeruginosa (strain ATCC 15692 / DSM 22644 / CIP 104116 / JCM 14847 / LMG 12228 / 1C / PRS 101 / PAO1) OX=208964 GN=speA PE=3 SV=1 && PF17944:Arginine decarboxylase C-terminal helical extension|PF17810:Arginine decarboxylase helical bundle domain|PF02784:Pyridoxal-dependent decarboxylase, pyridoxal bind…	-	NOT_CHANGE
PA4838	145.893	114.401	114.879	98.6264	99.1852	113.501	125.058	103.771	0.27068	0.233055	0.462292	PA4838	NC_002516.2	5429984	5431138	+	1155	protein_coding	hypothetical protein&&-- && PF07786:Protein of unknown function (DUF1624)	-	NOT_CHANGE
PA4837	99.5619	111.468	97.2851	77.7631	59.1296	56.7504	102.772	64.5477	0.66938	0.00729453	0.0540589	PA4837	NC_002516.2	5427716	5429842	-	2127	protein_coding	hypothetical protein&&sp|Q9HUX3|CNTO_PSEAE Metal-pseudopaline receptor CntO OS=Pseudomonas aeruginosa (strain ATCC 15692 / DSM 22644 / CIP 104116 / JCM 14847 / LMG 12228 / 1C / PRS 101 / PAO1) OX=208964 GN=cntO PE=2 SV=1 && PF07715:TonB-dependent Receptor Plug Domain|PF00593:TonB dependent receptor	TonB_dep_Rec	NOT_CHANGE
PA4836	42.3877	56.7116	31.0484	60.6932	35.287	35.7317	43.3826	43.904	-0.0176274	0.962166	0.981813	PA4836	NC_002516.2	5426895	5427686	-	792	protein_coding	hypothetical protein&&sp|Q9HUX4|NASLL_PSEAE L-histidine 2-aminobutanoyltransferase OS=Pseudomonas aeruginosa (strain ATCC 15692 / DSM 22644 / CIP 104116 / JCM 14847 / LMG 12228 / 1C / PRS 101 / PAO1) OX=208964 GN=cntL PE=1 SV=1 && PF03059:Nicotianamine synthase protein	-	NOT_CHANGE
PA4835	62.1029	75.2895	53.8173	69.2282	43.8704	81.9728	63.7366	65.0238	-0.0253997	0.936534	0.968356	PA4835	NC_002516.2	5425597	5426898	-	1302	protein_coding	hypothetical protein&&sp|Q9HUX5|ODH_PSEAE Pseudopaline synthase OS=Pseudomonas aeruginosa (strain ATCC 15692 / DSM 22644 / CIP 104116 / JCM 14847 / LMG 12228 / 1C / PRS 101 / PAO1) OX=208964 GN=cntM PE=1 SV=1 && PF10100:Staphylopine dehydrogenase	-	NOT_CHANGE
PA4834	34.5016	44.9781	42.4329	46.4682	25.75	36.7826	40.6375	36.3336	0.161268	0.635928	0.80276	PA4834	NC_002516.2	5424761	5425615	-	855	protein_coding	hypothetical protein&&sp|Q9HUX6|CNTI_PSEAE Pseudopaline exporter CntI OS=Pseudomonas aeruginosa (strain ATCC 15692 / DSM 22644 / CIP 104116 / JCM 14847 / LMG 12228 / 1C / PRS 101 / PAO1) OX=208964 GN=cntI PE=2 SV=1 && PF00892:EamA-like transporter family	DUF6	NOT_CHANGE
PA4833	374.589	474.226	490.565	738.75	471.13	553.842	446.46	587.907	-0.397307	0.0986073	0.278072	PA4833	NC_002516.2	5424099	5424716	+	618	protein_coding	hypothetical protein&&sp|P54176|HLY3_BACCE Hemolysin-3 OS=Bacillus cereus OX=1396 PE=3 SV=1 && PF03006:Haemolysin-III related	-	NOT_CHANGE
PA4832	49.2881	77.2451	107.635	82.5048	84.8796	64.1069	78.0559	77.1638	0.0138584	0.966914	0.98371	PA4832	NC_002516.2	5423071	5423868	-	798	protein_coding	short-chain dehydrogenase&&sp|Q8CN40|Y2036_STAES Uncharacterized oxidoreductase SE_2036 OS=Staphylococcus epidermidis (strain ATCC 12228 / FDA PCI 1200) OX=176280 GN=SE_2036 PE=3 SV=1 && PF00106:short chain dehydrogenase	adh_short	NOT_CHANGE
PA4831	216.867	239.557	305.31	212.426	242.241	291.108	253.912	248.592	0.030905	0.894122	0.948818	PA4831	NC_002516.2	5422506	5423066	+	561	protein_coding	transcriptional regulator&&-- && PF00440:Bacterial regulatory proteins, tetR family	TetR_N	NOT_CHANGE
PA4830	54.2169	80.1784	124.194	86.2981	71.5278	73.5653	86.1963	77.1304	0.158438	0.640205	0.805729	PA4830	NC_002516.2	5421899	5422438	+	540	protein_coding	hypothetical protein&&-- && PF03061:Thioesterase superfamily	4HBT	NOT_CHANGE
PA4829	265.17	326.58	322.904	363.211	320.444	368.877	304.885	350.844	-0.202448	0.277117	0.511578	lpd3	NC_002516.2	5420323	5421726	-	1404	protein_coding	dihydrolipoamide dehydrogenase&&sp|Q9HUY1|DLDH3_PSEAE Dihydrolipoyl dehydrogenase 3 OS=Pseudomonas aeruginosa (strain ATCC 15692 / DSM 22644 / CIP 104116 / JCM 14847 / LMG 12228 / 1C / PRS 101 / PAO1) OX=208964 GN=lpd3 PE=3 SV=1 && PF02852:Pyridine nucleotide-disulphide oxidoreductase, dimerisation domain|PF07992:Pyridine nucleotide-disulphide oxidoreductase	Pyr_redox_2	NOT_CHANGE
PA4828	40.4162	36.1781	48.6426	51.2099	41.963	56.7504	41.7456	49.9744	-0.259151	0.384874	0.610663	PA4828	NC_002516.2	5419863	5420318	+	456	protein_coding	hypothetical protein&&-- && PF09980:Predicted membrane protein (DUF2214)	-	NOT_CHANGE
PA4827	188.28	199.468	197.675	269.326	189.787	214.39	195.141	224.501	-0.202597	0.342532	0.574658	PA4827	NC_002516.2	5418899	5419738	-	840	protein_coding	arylamine N-acetyltransferase&&sp|P77567|NHOA_ECOLI Arylamine N-acetyltransferase OS=Escherichia coli (strain K12) OX=83333 GN=nhoA PE=1 SV=1 && PF00797:N-acetyltransferase	Acetyltransf_2	NOT_CHANGE
PA4826	101.533	128.09	185.256	3039.4	4184.85	2433.96	138.293	3219.4	-4.54191	1.18e-50	1.28e-47	PA4826	NC_002516.2	5418351	5418569	-	219	protein_coding	hypothetical protein&&-- && -	-	DOWN
PA4825	844.797	1345.43	1260.57	176690	161161	115036	1150.27	150962	-7.03611	6.67e-158	1.21e-154	mgtA	NC_002516.2	5415413	5418124	-	2712	protein_coding	Mg(2+) transport ATPase&&sp|P22036|ATMB_SALTY Magnesium-transporting ATPase, P-type 1 OS=Salmonella typhimurium (strain LT2 / SGSC1412 / ATCC 700720) OX=99287 GN=mgtB PE=1 SV=3 && PF00122:E1-E2 ATPase|PF00689:Cation transporting ATPase, C-terminus|PF00690:Cation transporter/ATPase, N-terminus|PF00702:haloacid dehalogenase-like hydrolase	E1-E2_ATPase	DOWN
PA4824	147.864	211.202	190.43	9363.82	10974.3	10705.9	183.165	10348	-5.82011	7.31e-185	3.98e-181	PA4824	NC_002516.2	5414539	5415315	-	777	protein_coding	hypothetical protein&&-- && -	-	DOWN
PA4823	23.6583	25.4224	25.8737	1044.11	1603.18	1633.15	24.9848	1426.81	-5.83585	3.15e-87	4.3e-84	PA4823	NC_002516.2	5414279	5414488	-	210	protein_coding	hypothetical protein&&-- && -	-	DOWN
PA4822	257.284	281.602	295.995	8824.22	11122.1	11248.1	278.294	10398.1	-5.22376	4.79e-176	1.3e-172	PA4822	NC_002516.2	5412569	5414236	-	1668	protein_coding	hypothetical protein&&sp|Q8X5Z7|YJBB_ECO57 Uncharacterized protein YjbB OS=Escherichia coli O157:H7 OX=83334 GN=yjbB PE=4 SV=1 && PF01895:PhoU domain|PF02690:Na+/Pi-cotransporter	Na_Pi_cotrans	DOWN
PA4821	122.234	104.623	115.914	537.704	872.639	734.602	114.257	714.981	-2.64568	7.78e-27	6.05e-24	PA4821	NC_002516.2	5410876	5412237	+	1362	protein_coding	transporter&&sp|P28303|DINF_ECOLI DNA damage-inducible protein F OS=Escherichia coli (strain K12) OX=83333 GN=dinF PE=2 SV=1 && PF01554:MatE	MatE	DOWN
PA4820	20.701	19.5557	24.8388	20.8633	33.3796	28.3752	21.6985	27.5394	-0.344753	0.362123	0.590387	PA4820	NC_002516.2	5410277	5410639	-	363	protein_coding	hypothetical protein&&-- && PF04138:GtrA-like protein	-	NOT_CHANGE
PA4819	11.8291	13.689	17.5941	29.3983	25.75	27.3243	14.3707	27.4908	-0.938884	0.0182311	0.0989094	PA4819	NC_002516.2	5409306	5410280	-	975	protein_coding	glycosyl transferase family protein&&sp|Q55487|Y501_SYNY3 Uncharacterized glycosyltransferase sll0501 OS=Synechocystis sp. (strain PCC 6803 / Kazusa) OX=1111708 GN=sll0501 PE=1 SV=1 && PF00535:Glycosyl transferase family 2	Glycos_transf_2	NOT_CHANGE
PA4818	16.7579	27.378	17.5941	28.4499	33.3796	26.2733	20.5767	29.3676	-0.512865	0.178641	0.39443	PA4818	NC_002516.2	5407873	5409309	-	1437	protein_coding	hypothetical protein&&-- && PF02366:Dolichyl-phosphate-mannose-protein mannosyltransferase	-	NOT_CHANGE
PA4817	36.4732	18.5779	27.9436	12.3283	20.9815	15.764	27.6649	16.3579	0.757207	0.0815257	0.245857	PA4817	NC_002516.2	5407376	5407870	+	495	protein_coding	hypothetical protein&&-- && PF03692:Putative zinc- or iron-chelating domain	-	NOT_CHANGE
PA4816	155.75	157.423	156.277	149.836	169.759	126.112	156.484	148.569	0.0734028	0.726443	0.863018	PA4816	NC_002516.2	5406165	5407400	+	1236	protein_coding	hypothetical protein&&-- && PF08874:Domain of unknown function (DUF1835)	-	NOT_CHANGE
PA4815	128.149	85.0673	80.7259	67.3315	58.1759	74.6162	97.9807	66.7079	0.556636	0.051694	0.186228	PA4815	NC_002516.2	5405559	5406008	+	450	protein_coding	hypothetical protein&&-- && PF04657:Putative inner membrane exporter, YdcZ	-	NOT_CHANGE
PA4814	34.5016	16.6224	19.664	35.0882	12.3981	15.764	23.596	21.0835	0.159774	0.756741	0.877283	fadH2	NC_002516.2	5403305	5405350	+	2046	protein_coding	2%2C4-dienoyl-CoA reductase&&sp|P42593|FADH_ECOLI 2,4-dienoyl-CoA reductase [(2E)-enoyl-CoA-producing] OS=Escherichia coli (strain K12) OX=83333 GN=fadH PE=1 SV=3 && PF00724:NADH:flavin oxidoreductase / NADH oxidase family|PF07992:Pyridine nucleotide-disulphide oxidoreductase	Oxidored_FMN	NOT_CHANGE
PA4813	25.6298	20.5335	31.0484	44.5716	37.1944	27.3243	25.7372	36.3634	-0.50455	0.163539	0.376021	lipC	NC_002516.2	5402016	5402945	-	930	protein_coding	lipase LipC&&sp|P15493|LIP_VIBCH Triacylglycerol lipase OS=Vibrio cholerae serotype O1 (strain ATCC 39315 / El Tor Inaba N16961) OX=243277 GN=hlyC PE=1 SV=2 && PF00561:alpha/beta hydrolase fold	Abhydrolase_1	NOT_CHANGE
PA4812	11651.7	11532	11161.9	8199.27	10545.1	9865.11	11448.5	9536.49	0.263646	0.108939	0.292525	fdnG	NC_002516.2	5398628	5401708	-	3081	protein_coding	formate dehydrogenase-O major subunit&&sp|P32176|FDOG_ECOLI Formate dehydrogenase-O major subunit OS=Escherichia coli (strain K12) OX=83333 GN=fdoG PE=1 SV=5 && PF01568:Molydopterin dinucleotide binding domain|PF00384:Molybdopterin oxidoreductase|PF04879:Molybdopterin oxidoreductase Fe4S4 domain	-	NOT_CHANGE
PA4811	2459.47	2922.6	2707.42	2090.12	2448.16	2677.78	2696.5	2405.35	0.164948	0.349155	0.579141	fdnH	NC_002516.2	5397690	5398619	-	930	protein_coding	nitrate-inducible formate dehydrogenase subunit beta&&sp|P0AAJ6|FDOH_ECOL6 Formate dehydrogenase-O iron-sulfur subunit OS=Escherichia coli O6:H1 (strain CFT073 / ATCC 700928 / UPEC) OX=199310 GN=fdoH PE=3 SV=1 && PF13247:4Fe-4S dicluster domain|PF09163:Formate dehydrogenase N, transmembrane	-	NOT_CHANGE
PA4810	850.712	996.363	979.061	752.975	783.944	992.081	942.045	843	0.160622	0.398827	0.62336	fdnI	NC_002516.2	5396992	5397618	-	627	protein_coding	nitrate-inducible formate dehydrogenase subunit gamma&&sp|P0AEK8|FDNI_ECO57 Formate dehydrogenase, nitrate-inducible, cytochrome b556(Fdn) subunit OS=Escherichia coli O157:H7 OX=83334 GN=fdnI PE=3 SV=1 && PF01292:Prokaryotic cytochrome b561	Ni_hydr_CYTB	NOT_CHANGE
PA4809	565.827	478.137	501.95	350.882	274.667	405.66	515.305	343.736	0.58487	0.00621282	0.0484872	fdhE	NC_002516.2	5395930	5396859	-	930	protein_coding	formate dehydrogenase subunit epsilon&&sp|Q9HV00|FDHE_PSEAE Protein FdhE homolog OS=Pseudomonas aeruginosa (strain ATCC 15692 / DSM 22644 / CIP 104116 / JCM 14847 / LMG 12228 / 1C / PRS 101 / PAO1) OX=208964 GN=fdhE PE=1 SV=1 && PF04216:Protein involved in formate dehydrogenase formation	-	NOT_CHANGE
PA4808	1504.27	1418.77	1334.05	1396.89	1358.07	1661.52	1419.03	1472.16	-0.0527733	0.750351	0.874165	selA	NC_002516.2	5394445	5395851	-	1407	protein_coding	selenocysteine synthase&&sp|Q9HV01|SELA_PSEAE L-seryl-tRNA(Sec) selenium transferase OS=Pseudomonas aeruginosa (strain ATCC 15692 / DSM 22644 / CIP 104116 / JCM 14847 / LMG 12228 / 1C / PRS 101 / PAO1) OX=208964 GN=selA PE=3 SV=1 && PF12390:Selenocysteine synthase N terminal|PF03841:L-seryl-tRNA selenium transferase	-	NOT_CHANGE
PA4807	989.704	908.363	901.44	824.1	803.018	996.284	933.169	874.467	0.0941321	0.58082	0.76474	selB	NC_002516.2	5392523	5394448	-	1926	protein_coding	selenocysteine-specific elongation factor&&sp|P14081|SELB_ECOLI Selenocysteine-specific elongation factor OS=Escherichia coli (strain K12) OX=83333 GN=selB PE=1 SV=3 && PF09107:Elongation factor SelB, winged helix|PF09106:Elongation factor SelB, winged helix|PF00009:Elongation factor Tu GTP binding domain	GTP_EFTU	NOT_CHANGE
PA4806	140.964	127.112	179.046	165.958	185.018	170.251	149.041	173.742	-0.222385	0.313059	0.545635	PA4806	NC_002516.2	5391836	5392519	+	684	protein_coding	transcriptional regulator&&-- && PF00196:Bacterial regulatory proteins, luxR family	GerE	NOT_CHANGE
PA4805	56.1884	63.5561	70.3765	75.8665	73.4352	63.056	63.3736	70.7859	-0.162063	0.523242	0.722533	PA4805	NC_002516.2	5390148	5391554	-	1407	protein_coding	hypothetical protein&&sp|Q9I6J2|SPUC_PSEAE Putrescine--pyruvate aminotransferase OS=Pseudomonas aeruginosa (strain ATCC 15692 / DSM 22644 / CIP 104116 / JCM 14847 / LMG 12228 / 1C / PRS 101 / PAO1) OX=208964 GN=spuC PE=1 SV=1 && PF00202:Aminotransferase class-III	Aminotran_3	NOT_CHANGE
PA4804	101.533	88.9785	101.425	104.316	140.194	104.042	97.3123	116.184	-0.257025	0.282156	0.515567	PA4804	NC_002516.2	5388702	5390099	-	1398	protein_coding	amino acid permease&&sp|Q9CEY5|AGUD_LACLA Probable agmatine/putrescine antiporter AguD OS=Lactococcus lactis subsp. lactis (strain IL1403) OX=272623 GN=aguD PE=3 SV=1 && PF13520:Amino acid permease	-	NOT_CHANGE
PA4803	327.273	420.448	412.944	506.409	420.583	442.443	386.888	456.478	-0.238887	0.219193	0.446507	PA4803	NC_002516.2	5387990	5388607	-	618	protein_coding	hypothetical protein&&-- && PF08241:Methyltransferase domain	Methyltransf_11	NOT_CHANGE
PA4802_1	142.935	136.89	174.906	118.541	185.018	93.533	151.577	132.364	0.193601	0.520885	0.721766	PA4802_1	NC_002516.2	5387766	5387857	-	92	protein_coding	tRNA-Sec&&-- && -	-	NOT_CHANGE
PA4802	65.0602	71.3783	87.9706	69.2282	98.2315	68.3106	74.8031	78.5901	-0.0736159	0.790589	0.895475	PA4802	NC_002516.2	5387000	5387722	+	723	protein_coding	hypothetical protein&&-- && PF00795:Carbon-nitrogen hydrolase	CN_hydrolase	NOT_CHANGE
PA4801	143.921	141.779	175.941	82.5048	116.352	145.029	153.88	114.628	0.42649	0.116457	0.304399	PA4801	NC_002516.2	5386369	5386737	-	369	protein_coding	hypothetical protein&&-- && -	-	NOT_CHANGE
PA4800	117.306	102.667	83.8308	67.3315	93.4629	88.2784	101.268	83.0243	0.288244	0.26893	0.501836	PA4800	NC_002516.2	5385273	5386073	-	801	protein_coding	hypothetical protein&&-- && PF08241:Methyltransferase domain	Methyltransf_11	NOT_CHANGE
PA4799	47.3165	62.5783	68.3066	49.3132	71.5278	53.5976	59.4005	58.1462	0.0290215	0.921773	0.962447	PA4799	NC_002516.2	5384698	5385276	-	579	protein_coding	hypothetical protein&&-- && PF13671:AAA domain	-	NOT_CHANGE
PA4798	278.97	228.802	255.632	301.569	323.305	267.988	254.468	297.621	-0.22668	0.231199	0.459948	PA4798	NC_002516.2	5383947	5384675	+	729	protein_coding	hypothetical protein&&sp|Q9HV11|Y4798_PSEAE UPF0157 protein PA4798 OS=Pseudomonas aeruginosa (strain ATCC 15692 / DSM 22644 / CIP 104116 / JCM 14847 / LMG 12228 / 1C / PRS 101 / PAO1) OX=208964 GN=PA4798 PE=3 SV=1 && PF04229:GrpB protein	-	NOT_CHANGE
PA4797	0	2.93336	2.0699	2.84499	1.90741	0	1.66775	1.58413	0.0537872	0.970584	1	PA4797	NC_002516.2	5382796	5383812	-	1017	protein_coding	transposase&&sp|Q9HI37|TPF20_PSEAE Probable family 20 transposase OS=Pseudomonas aeruginosa (strain ATCC 15692 / DSM 22644 / CIP 104116 / JCM 14847 / LMG 12228 / 1C / PRS 101 / PAO1) OX=208964 GN=PA0445 PE=3 SV=1 && PF02371:Transposase IS116/IS110/IS902 family|PF01548:Transposase	Transposase_20	NOT_CHANGE
PA4796	354.874	288.447	316.694	326.226	330.935	292.159	320.005	316.44	0.0156587	0.931308	0.966439	PA4796	NC_002516.2	5381991	5382458	+	468	protein_coding	hypothetical protein&&sp|O66720|GCSH5_AQUAE Glycine cleavage system H protein 5 OS=Aquifex aeolicus (strain VF5) OX=224324 GN=gcvH5 PE=3 SV=1 && PF01597:Glycine cleavage H-protein	-	NOT_CHANGE
PA4795	338.116	295.291	293.925	271.223	284.204	290.057	309.111	281.828	0.133701	0.437055	0.656366	PA4795	NC_002516.2	5381617	5381994	+	378	protein_coding	hypothetical protein&&-- && PF02635:DsrE/DsrF-like family	-	NOT_CHANGE
PA4794	413.034	311.914	341.533	461.837	371.944	348.91	355.493	394.23	-0.149629	0.482897	0.694661	PA4794	NC_002516.2	5381145	5381627	+	483	protein_coding	hypothetical protein&&-- && PF00583:Acetyltransferase (GNAT) family	Acetyltransf_1	NOT_CHANGE
PA4793	1384.99	1511.66	1482.05	2101.5	1625.11	1522.8	1459.57	1749.8	-0.261805	0.169478	0.38289	PA4793	NC_002516.2	5380580	5381143	+	564	protein_coding	hypothetical protein&&-- && PF13590:Domain of unknown function (DUF4136)	-	NOT_CHANGE
PA4792	356.845	343.203	299.1	421.059	354.778	444.545	333.049	406.794	-0.287857	0.126425	0.320125	PA4792	NC_002516.2	5379513	5380448	-	936	protein_coding	hypothetical protein&&sp|P9WLF1|Y2277_MYCTU Uncharacterized protein Rv2277c OS=Mycobacterium tuberculosis (strain ATCC 25618 / H37Rv) OX=83332 GN=Rv2277c PE=1 SV=1 && PF03009:Glycerophosphoryl diester phosphodiesterase family	-	NOT_CHANGE
PA4791	124.206	162.312	181.116	236.134	145.917	218.594	155.878	200.215	-0.361205	0.185423	0.40371	PA4791	NC_002516.2	5378908	5379528	+	621	protein_coding	hypothetical protein&&-- && PF13590:Domain of unknown function (DUF4136)	-	NOT_CHANGE
PA4790	77.8751	84.0896	96.2502	70.1765	71.5278	108.246	86.0716	83.3168	0.0494558	0.857612	0.930189	PA4790	NC_002516.2	5378093	5378842	+	750	protein_coding	hypothetical protein&&sp|Q8XDG3|CMOM_ECO57 tRNA 5-carboxymethoxyuridine methyltransferase OS=Escherichia coli O157:H7 OX=83334 GN=cmoM PE=1 SV=1 && PF13489:Methyltransferase domain	-	NOT_CHANGE
PA4789	82.8039	77.2451	70.3765	49.3132	57.2222	66.2088	76.8085	57.5814	0.41877	0.104354	0.28678	PA4789	NC_002516.2	5377791	5378096	+	306	protein_coding	hypothetical protein&&-- && PF12643:MazG-like family	-	NOT_CHANGE
PA4788	60.1314	50.8448	58.992	70.1765	74.3889	70.4125	56.6561	71.6593	-0.339681	0.173366	0.387494	PA4788	NC_002516.2	5376852	5377709	+	858	protein_coding	hypothetical protein&&-- && PF01575:MaoC like domain	-	NOT_CHANGE
PA4787	1423.44	1745.35	1792.53	2140.38	1962.72	1512.29	1653.77	1871.8	-0.178858	0.392199	0.617411	PA4787	NC_002516.2	5375590	5376591	-	1002	protein_coding	transcriptional regulator&&sp|P72171|ORUR_PSEAE Ornithine utilization regulator OS=Pseudomonas aeruginosa (strain ATCC 15692 / DSM 22644 / CIP 104116 / JCM 14847 / LMG 12228 / 1C / PRS 101 / PAO1) OX=208964 GN=oruR PE=4 SV=1 && PF12833:Helix-turn-helix domain|PF12625:Arabinose-binding domain of AraC transcription regulator, N-term	-	NOT_CHANGE
PA4786	288.828	228.802	250.457	468.475	304.231	351.012	256.029	374.573	-0.54917	0.0202901	0.105047	PA4786	NC_002516.2	5374123	5375478	+	1356	protein_coding	3-ketoacyl-ACP reductase&&sp|I6Y778|FABG4_MYCTU 3-oxoacyl-[acyl-carrier-protein] reductase [NADH] OS=Mycobacterium tuberculosis (strain ATCC 25618 / H37Rv) OX=83332 GN=fabG4 PE=1 SV=1 && PF13561:Enoyl-(Acyl carrier protein) reductase	-	NOT_CHANGE
PA4785	283.899	249.335	260.807	494.08	304.231	382.54	264.68	393.617	-0.572657	0.0154918	0.0886855	PA4785	NC_002516.2	5372591	5373868	-	1278	protein_coding	acetyl-CoA acetyltransferase&&sp|A1RI91|FADI_SHESW 3-ketoacyl-CoA thiolase OS=Shewanella sp. (strain W3-18-1) OX=351745 GN=fadI PE=3 SV=1 && PF02803:Thiolase, C-terminal domain|PF00108:Thiolase, N-terminal domain	Thiolase_N	NOT_CHANGE
PA4784	142.935	118.312	142.823	145.095	134.472	166.047	134.69	148.538	-0.140467	0.511697	0.715771	PA4784	NC_002516.2	5371800	5372267	+	468	protein_coding	transcriptional regulator&&sp|Q9V2D7|REG3_PYRAB Uncharacterized HTH-type transcriptional regulator PYRAB01370 OS=Pyrococcus abyssi (strain GE5 / Orsay) OX=272844 GN=PYRAB01370 PE=4 SV=1 && PF13412:Winged helix-turn-helix DNA-binding|PF01037:Lrp/AsnC ligand binding domain	AsnC_trans_reg	NOT_CHANGE
PA4783	382.475	552.449	487.461	421.059	478.759	505.499	474.128	468.439	0.0176783	0.933104	0.966644	PA4783	NC_002516.2	5370755	5371645	-	891	protein_coding	hypothetical protein&&sp|P0AA72|YEDA_ECO57 Uncharacterized inner membrane transporter YedA OS=Escherichia coli O157:H7 OX=83334 GN=yedA PE=3 SV=1 && PF00892:EamA-like transporter family	DUF6	NOT_CHANGE
PA4782	146.878	206.313	183.186	140.353	161.176	152.385	178.792	151.305	0.240927	0.27436	0.508312	PA4782	NC_002516.2	5370476	5370721	-	246	protein_coding	hypothetical protein&&-- && -	-	NOT_CHANGE
PA4781	264.184	214.135	249.422	501.667	334.75	463.461	242.58	433.293	-0.83682	0.00026413	0.00470169	PA4781	NC_002516.2	5369187	5370368	-	1182	protein_coding	cyclic di-GMP phosphodiesterase&&sp|Q9HV27|CDPD2_PSEAE Cyclic di-GMP phosphodiesterase PA4781 OS=Pseudomonas aeruginosa (strain ATCC 15692 / DSM 22644 / CIP 104116 / JCM 14847 / LMG 12228 / 1C / PRS 101 / PAO1) OX=208964 GN=PA4781 PE=1 SV=1 && PF13487:HD domain|PF00072:Response regulator receiver domain	Response_reg	NOT_CHANGE
PA4780	248.412	252.269	229.758	216.219	259.407	235.409	243.48	237.012	0.0390783	0.830264	0.917827	PA4780	NC_002516.2	5368170	5369063	-	894	protein_coding	hypothetical protein&&sp|D4GYY1|RIO1_HALVD RIO-type serine/threonine-protein kinase Rio1 OS=Haloferax volcanii (strain ATCC 29605 / DSM 3757 / JCM 8879 / NBRC 14742 / NCIMB 2012 / VKM B-1768 / DS2) OX=309800 GN=rio1 PE=1 SV=1 && PF01163:RIO1 family	-	NOT_CHANGE
PA4779	177.437	164.268	144.893	188.718	173.574	159.742	162.199	174.011	-0.101676	0.613926	0.788135	PA4779	NC_002516.2	5367187	5368080	-	894	protein_coding	hypothetical protein&&sp|P31125|EAMA_ECOLI Probable amino-acid metabolite efflux pump OS=Escherichia coli (strain K12) OX=83333 GN=eamA PE=1 SV=2 && PF00892:EamA-like transporter family	DUF6	NOT_CHANGE
PA4778	992.661	910.318	1069.1	1087.74	1015.69	922.719	990.694	1008.72	-0.0263395	0.87196	0.937941	cueR	NC_002516.2	5366257	5366655	+	399	protein_coding	protein CueR&&sp|Q9HV30|Y4778_PSEAE Uncharacterized HTH-type transcriptional regulator PA4778 OS=Pseudomonas aeruginosa (strain ATCC 15692 / DSM 22644 / CIP 104116 / JCM 14847 / LMG 12228 / 1C / PRS 101 / PAO1) OX=208964 GN=PA4778 PE=3 SV=1 && PF09278:MerR, DNA binding|PF00376:MerR family regulatory protein	MerR	NOT_CHANGE
PA4777	144.907	176.979	152.137	123.283	120.167	147.131	158.008	130.193	0.281013	0.189101	0.408982	pmrB	NC_002516.2	5364760	5366193	+	1434	protein_coding	two-component regulator system signal sensor kinase PmrB&&sp|Q9HV31|PMRB_PSEAE Sensor protein kinase PmrB OS=Pseudomonas aeruginosa (strain ATCC 15692 / DSM 22644 / CIP 104116 / JCM 14847 / LMG 12228 / 1C / PRS 101 / PAO1) OX=208964 GN=pmrB PE=2 SV=1 && PF02518:Histidine kinase-, DNA gyrase B-, and HSP90-like ATPase|PF00512:His Kinase A (phospho-acceptor) domain	HATPase_c	NOT_CHANGE
PA4776	115.334	129.068	187.326	113.8	88.6944	136.621	143.909	113.038	0.34887	0.22609	0.454995	pmrA	NC_002516.2	5364071	5364736	+	666	protein_coding	two-component regulator system response regulator PmrA&&sp|Q9HV32|PMRA_PSEAE Response regulator protein PmrA OS=Pseudomonas aeruginosa (strain ATCC 15692 / DSM 22644 / CIP 104116 / JCM 14847 / LMG 12228 / 1C / PRS 101 / PAO1) OX=208964 GN=pmrA PE=1 SV=1 && PF00486:Transcriptional regulatory protein, C terminal|PF00072:Response regulator receiver domain	Response_reg	NOT_CHANGE
PA4775	186.309	247.38	252.527	123.283	142.102	160.793	228.739	142.059	0.68812	0.00263651	0.0264476	PA4775	NC_002516.2	5363198	5364058	+	861	protein_coding	hypothetical protein&&-- && -	-	NOT_CHANGE
PA4774	214.896	315.825	321.869	143.198	117.306	210.187	284.196	156.897	0.858525	0.00351356	0.0329971	PA4774	NC_002516.2	5362146	5363195	+	1050	protein_coding	hypothetical protein&&sp|Q9HV34|SPEE2_PSEAE Polyamine aminopropyltransferase 2 OS=Pseudomonas aeruginosa (strain ATCC 15692 / DSM 22644 / CIP 104116 / JCM 14847 / LMG 12228 / 1C / PRS 101 / PAO1) OX=208964 GN=speE2 PE=3 SV=1 && PF17284:Spermidine synthase tetramerisation domain|PF01564:Spermine/spermidine synthase domain	-	NOT_CHANGE
PA4773	170.537	200.446	267.017	127.076	78.2037	199.677	212.666	134.986	0.657222	0.0685238	0.220216	PA4773	NC_002516.2	5361586	5362068	+	483	protein_coding	hypothetical protein&&sp|B7V1I5|SPEH_PSEA8 S-adenosylmethionine decarboxylase proenzyme OS=Pseudomonas aeruginosa (strain LESB58) OX=557722 GN=speH PE=3 SV=1 && PF02675:S-adenosylmethionine decarboxylase	-	NOT_CHANGE
PA4772	412.048	353.958	318.764	371.746	346.194	357.317	361.59	358.419	0.0129906	0.943429	0.970758	PA4772	NC_002516.2	5358442	5361258	+	2817	protein_coding	ferredoxin&&sp|Q86WU2|LDHD_HUMAN Probable D-lactate dehydrogenase, mitochondrial OS=Homo sapiens OX=9606 GN=LDHD PE=1 SV=1 && PF02913:FAD linked oxidases, C-terminal domain|PF01565:FAD binding domain|PF12838:4Fe-4S dicluster domain	FAD_binding_4	NOT_CHANGE
PA4771	235.597	234.669	187.326	219.064	241.287	261.682	219.197	240.678	-0.133675	0.504677	0.711248	lldD	NC_002516.2	5357230	5358375	+	1146	protein_coding	L-lactate dehydrogenase&&sp|B7V1I3|LLDD_PSEA8 L-lactate dehydrogenase OS=Pseudomonas aeruginosa (strain LESB58) OX=557722 GN=lldD PE=3 SV=1 && PF01070:FMN-dependent dehydrogenase	FMN_dh	NOT_CHANGE
PA4770	149.836	151.557	166.627	156.475	187.88	104.042	156.006	149.466	0.0597333	0.823271	0.914353	lldP	NC_002516.2	5355387	5357075	+	1689	protein_coding	L-lactate permease&&sp|Q46839|GLCA_ECOLI Glycolate permease GlcA OS=Escherichia coli (strain K12) OX=83333 GN=glcA PE=1 SV=1 && PF02652:L-lactate permease	-	NOT_CHANGE
PA4769	538.226	559.293	516.439	496.925	486.389	526.517	537.986	503.277	0.0966002	0.523844	0.722533	PA4769	NC_002516.2	5354285	5355058	-	774	protein_coding	transcriptional regulator&&sp|P0ACM1|PDHR_ECO57 Pyruvate dehydrogenase complex repressor OS=Escherichia coli O157:H7 OX=83334 GN=pdhR PE=3 SV=1 && PF00392:Bacterial regulatory proteins, gntR family|PF07729:FCD domain	FCD	NOT_CHANGE
PA4768	1101.1	810.584	936.628	712.197	835.444	814.473	949.436	787.371	0.270105	0.158887	0.370834	smpB	NC_002516.2	5353783	5354262	+	480	protein_coding	SsrA-binding protein&&sp|A6VCM5|SSRP_PSEA7 SsrA-binding protein OS=Pseudomonas aeruginosa (strain PA7) OX=381754 GN=smpB PE=3 SV=1 && PF01668:SmpB protein	-	NOT_CHANGE
PA4767	711.719	757.784	762.757	763.406	715.278	705.176	744.087	727.953	0.0314371	0.829412	0.917714	PA4767	NC_002516.2	5353073	5353507	-	435	protein_coding	hypothetical protein&&sp|O68560|RATA_PSEAE Ribosome association toxin RatA OS=Pseudomonas aeruginosa (strain ATCC 15692 / DSM 22644 / CIP 104116 / JCM 14847 / LMG 12228 / 1C / PRS 101 / PAO1) OX=208964 GN=ratA PE=3 SV=1 && PF03364:Polyketide cyclase / dehydrase and lipid transport	-	NOT_CHANGE
PA4766	94.6331	104.623	93.1453	114.748	111.583	94.5839	97.4671	106.972	-0.13535	0.541419	0.736909	PA4766	NC_002516.2	5352775	5353080	-	306	protein_coding	hypothetical protein&&sp|B7V1H8|RNFH_PSEA8 Protein RnfH OS=Pseudomonas aeruginosa (strain LESB58) OX=557722 GN=rnfH PE=3 SV=1 && PF03658:RnfH family Ubiquitin	-	NOT_CHANGE
PA4765	1951.81	1648.55	1903.27	1239.47	1232.18	1410.35	1834.54	1294	0.503717	0.0019398	0.0212804	omlA	NC_002516.2	5352177	5352707	+	531	protein_coding	outer membrane lipoprotein OmlA&&sp|O68562|BAME_PSEAE Outer membrane protein assembly factor BamE OS=Pseudomonas aeruginosa (strain ATCC 15692 / DSM 22644 / CIP 104116 / JCM 14847 / LMG 12228 / 1C / PRS 101 / PAO1) OX=208964 GN=bamE PE=3 SV=1 && PF04355:SmpA / OmlA family	-	NOT_CHANGE
PA4764	2236.69	2261.62	2328.63	2314.88	1992.29	1803.4	2275.65	2036.85	0.159779	0.333854	0.564753	fur	NC_002516.2	5351675	5352079	-	405	protein_coding	ferric uptake regulation protein&&sp|Q03456|FUR_PSEAE Ferric uptake regulation protein OS=Pseudomonas aeruginosa (strain ATCC 15692 / DSM 22644 / CIP 104116 / JCM 14847 / LMG 12228 / 1C / PRS 101 / PAO1) OX=208964 GN=fur PE=1 SV=1 && PF01475:Ferric uptake regulator family	FUR	NOT_CHANGE
PA4763	1092.22	1096.1	1175.7	1667.17	1439.14	1926.36	1121.34	1677.55	-0.581001	0.00113138	0.014324	recN	NC_002516.2	5349929	5351605	+	1677	protein_coding	DNA repair protein RecN&&sp|A5F379|RECN_VIBC3 DNA repair protein RecN OS=Vibrio cholerae serotype O1 (strain ATCC 39541 / Classical Ogawa 395 / O395) OX=345073 GN=recN PE=3 SV=1 && PF02463:RecF/RecN/SMC N terminal domain	SMC_N	NOT_CHANGE
PA4762	2034.61	4802.88	4144.97	6218.21	4114.28	1787.64	3660.82	4040.04	-0.142253	0.754124	0.875918	grpE	NC_002516.2	5349201	5349761	-	561	protein_coding	heat shock protein GrpE&&sp|Q02FR0|GRPE_PSEAB Protein GrpE OS=Pseudomonas aeruginosa (strain UCBPP-PA14) OX=208963 GN=grpE PE=3 SV=1 && PF01025:GrpE	-	NOT_CHANGE
PA4761	18374.6	41603.8	34342.7	62050.2	35383.4	17441.3	31440.4	38291.6	-0.284418	0.529124	0.726377	dnaK	NC_002516.2	5347198	5349111	-	1914	protein_coding	molecular chaperone DnaK&&sp|Q02FR1|DNAK_PSEAB Chaperone protein DnaK OS=Pseudomonas aeruginosa (strain UCBPP-PA14) OX=208963 GN=dnaK PE=3 SV=1 && PF00012:Hsp70 protein|PF10712:NAD-specific glutamate dehydrogenase	HSP70	NOT_CHANGE
PA4760	2273.16	3542.52	2870.95	4098.69	2742.85	1791.84	2895.54	2877.79	0.00879099	0.978592	0.990595	dnaJ	NC_002516.2	5345949	5347082	-	1134	protein_coding	molecular chaperone DnaJ&&sp|A6VCL7|DNAJ_PSEA7 Chaperone protein DnaJ OS=Pseudomonas aeruginosa (strain PA7) OX=381754 GN=dnaJ PE=3 SV=1 && PF00684:DnaJ central domain|PF00226:DnaJ domain|PF01556:DnaJ C terminal domain	DnaJ_C	NOT_CHANGE
PA4759	1605.8	2173.62	1947.77	3130.44	1531.65	1045.68	1909.06	1902.59	0.00478823	0.990004	0.995487	dapB	NC_002516.2	5345086	5345892	-	807	protein_coding	4-hydroxy-tetrahydrodipicolinate reductase&&sp|B7V1H1|DAPB_PSEA8 4-hydroxy-tetrahydrodipicolinate reductase OS=Pseudomonas aeruginosa (strain LESB58) OX=557722 GN=dapB PE=3 SV=1 && PF05173:Dihydrodipicolinate reductase, C-terminus|PF01113:Dihydrodipicolinate reductase, N-terminus	DapB_N	NOT_CHANGE
PA4758	3140.63	2452.29	2455.93	1173.09	1465.84	2086.1	2682.95	1575.01	0.768676	0.00326556	0.0312231	carA	NC_002516.2	5343767	5344903	-	1137	protein_coding	carbamoyl phosphate synthase small subunit&&sp|P38098|CARA_PSEAE Carbamoyl-phosphate synthase small chain OS=Pseudomonas aeruginosa (strain ATCC 15692 / DSM 22644 / CIP 104116 / JCM 14847 / LMG 12228 / 1C / PRS 101 / PAO1) OX=208964 GN=carA PE=3 SV=1 && PF00117:Glutamine amidotransferase class-I|PF00988:Carbamoyl-phosphate synthase small chain, CPSase domain	CPSase_sm_chain	NOT_CHANGE
PA4757	844.797	578.849	682.031	295.879	446.333	632.662	701.892	458.291	0.615572	0.046665	0.177004	PA4757	NC_002516.2	5343105	5343755	-	651	protein_coding	leucine export protein LeuE&&sp|P38102|Y4757_PSEAE Uncharacterized membrane protein PA4757 OS=Pseudomonas aeruginosa (strain ATCC 15692 / DSM 22644 / CIP 104116 / JCM 14847 / LMG 12228 / 1C / PRS 101 / PAO1) OX=208964 GN=PA4757 PE=3 SV=2 && PF01810:LysE type translocator	-	NOT_CHANGE
PA4756	8146.33	10914	9759.56	3866.35	7783.17	7892.5	9606.64	6514.01	0.560512	0.0648964	0.213203	carB	NC_002516.2	5339864	5343085	-	3222	protein_coding	carbamoyl phosphate synthase large subunit&&sp|P38100|CARB_PSEAE Carbamoyl-phosphate synthase large chain OS=Pseudomonas aeruginosa (strain ATCC 15692 / DSM 22644 / CIP 104116 / JCM 14847 / LMG 12228 / 1C / PRS 101 / PAO1) OX=208964 GN=carB PE=3 SV=3 && PF02786:Carbamoyl-phosphate synthase L chain, ATP binding domain|PF02142:MGS-like domain|PF02787:Carbamoyl-phosphate synthetase large chain, olig…	CPSase_L_D2	NOT_CHANGE
PA4755	1830.56	2866.87	2548.04	1329.56	2061.91	2380.36	2415.16	1923.94	0.328151	0.248399	0.478947	greA	NC_002516.2	5339391	5339867	-	477	protein_coding	transcription elongation factor GreA&&sp|Q9HV46|GREA_PSEAE Transcription elongation factor GreA OS=Pseudomonas aeruginosa (strain ATCC 15692 / DSM 22644 / CIP 104116 / JCM 14847 / LMG 12228 / 1C / PRS 101 / PAO1) OX=208964 GN=greA PE=3 SV=1 && PF03449:Transcription elongation factor, N-terminal|PF01272:Transcription elongation factor, GreA/GreB, C-term	-	NOT_CHANGE
PA4754	866.484	1149.88	1035.98	473.217	871.685	893.293	1017.45	746.065	0.447813	0.116993	0.304636	PA4754	NC_002516.2	5338973	5339380	-	408	protein_coding	hypothetical protein&&-- && -	-	NOT_CHANGE
PA4753	1883.79	1551.75	1525.51	792.805	947.028	1050.93	1653.68	930.255	0.830273	1.88e-05	0.000533274	PA4753	NC_002516.2	5338618	5338932	+	315	protein_coding	hypothetical protein&&sp|P95453|Y4753_PSEAE Probable RNA-binding protein PA4753 OS=Pseudomonas aeruginosa (strain ATCC 15692 / DSM 22644 / CIP 104116 / JCM 14847 / LMG 12228 / 1C / PRS 101 / PAO1) OX=208964 GN=PA4753 PE=4 SV=1 && PF01985:CRS1 / YhbY (CRM) domain	-	NOT_CHANGE
PA4752	970.975	1463.74	1274.02	1681.39	1342.81	950.043	1236.25	1324.75	-0.0999472	0.715574	0.854675	ftsJ	NC_002516.2	5337900	5338523	-	624	protein_coding	cell division protein FtsJ&&sp|B7V1G4|RLME_PSEA8 Ribosomal RNA large subunit methyltransferase E OS=Pseudomonas aeruginosa (strain LESB58) OX=557722 GN=rlmE PE=3 SV=1 && PF01728:FtsJ-like methyltransferase	-	NOT_CHANGE
PA4751	18256.3	18960.2	17336.4	21518.6	20881.3	18308.3	18184.3	20236.1	-0.154245	0.2969	0.52954	ftsH	NC_002516.2	5335782	5337701	-	1920	protein_coding	cell division protein FtsH&&sp|P63344|FTSH_SALTI ATP-dependent zinc metalloprotease FtsH OS=Salmonella typhi OX=90370 GN=ftsH PE=3 SV=1 && PF06480:FtsH Extracellular|PF17862:AAA+ lid domain|PF01434:Peptidase family M41|PF00004:ATPase family associated with various cellular activities (AAA)	AAA	NOT_CHANGE
PA4750	1724.1	1462.77	1359.92	1133.26	1363.8	1223.29	1515.59	1240.11	0.289464	0.106387	0.289371	folP	NC_002516.2	5334921	5335772	-	852	protein_coding	dihydropteroate synthase&&sp|P0AC14|DHPS_ECOL6 Dihydropteroate synthase OS=Escherichia coli O6:H1 (strain CFT073 / ATCC 700928 / UPEC) OX=199310 GN=folP PE=3 SV=1 && PF00809:Pterin binding enzyme	-	NOT_CHANGE
PA4749	5302.41	4066.61	3677.17	3466.15	3730.89	3121.27	4348.73	3439.44	0.338406	0.0983499	0.277978	glmM	NC_002516.2	5333567	5334904	-	1338	protein_coding	phosphoglucosamine mutase&&sp|Q02FS3|GLMM_PSEAB Phosphoglucosamine mutase OS=Pseudomonas aeruginosa (strain UCBPP-PA14) OX=208963 GN=glmM PE=3 SV=1 && PF02879:Phosphoglucomutase/phosphomannomutase, alpha/beta/alpha domain II|PF00408:Phosphoglucomutase/phosphomannomutase, C-terminal domain|PF02880:Phosphoglucomutase/phosphomannomutase, alpha/beta/alpha domain III|PF02878:Phosphoglucomutase/phospho…	PGM_PMM_III	NOT_CHANGE
PA4748	4350.16	4006.96	3830.34	1681.39	3561.13	4001.95	4062.49	3081.49	0.398806	0.213552	0.441282	tpiA	NC_002516.2	5332746	5333501	-	756	protein_coding	triosephosphate isomerase&&sp|B7V1G0|TPIS_PSEA8 Triosephosphate isomerase OS=Pseudomonas aeruginosa (strain LESB58) OX=557722 GN=tpiA PE=3 SV=1 && PF00121:Triosephosphate isomerase	-	NOT_CHANGE
PA4747	2494.96	2668.38	2598.75	1764.84	2792.44	2541.16	2587.36	2366.15	0.128993	0.55611	0.746643	secG	NC_002516.2	5332354	5332743	-	390	protein_coding	preprotein translocase subunit SecG&&sp|Q9HV52|SECG_PSEAE Protein-export membrane protein SecG OS=Pseudomonas aeruginosa (strain ATCC 15692 / DSM 22644 / CIP 104116 / JCM 14847 / LMG 12228 / 1C / PRS 101 / PAO1) OX=208964 GN=secG PE=3 SV=1 && PF03840:Preprotein translocase SecG subunit	-	NOT_CHANGE
PA4746_2	366.703	387.203	353.952	260.791	420.583	283.752	369.286	321.709	0.198686	0.40712	0.630793	PA4746_2	NC_002516.2	5332254	5332339	-	86	protein_coding	tRNA-Leu&&-- && -	-	NOT_CHANGE
PA4746_1	299.671	356.892	269.086	112.851	296.602	203.881	308.55	204.445	0.593986	0.0871924	0.257001	PA4746_1	NC_002516.2	5332087	5332163	-	77	protein_coding	tRNA-Met&&-- && -	-	NOT_CHANGE
PA4746	1393.87	1225.17	1172.6	452.354	1034.77	1158.13	1263.88	881.75	0.519643	0.127236	0.320952	PA4746	NC_002516.2	5331503	5331961	-	459	protein_coding	hypothetical protein&&sp|A6VCK3|RIMP_PSEA7 Ribosome maturation factor RimP OS=Pseudomonas aeruginosa (strain PA7) OX=381754 GN=rimP PE=3 SV=1 && PF17384:RimP C-terminal SH3 domain|PF02576:RimP N-terminal domain	-	NOT_CHANGE
PA4745	9514.57	9201.94	8784.64	3296.4	8933.34	9535.11	9167.05	7254.95	0.337514	0.359813	0.588505	nusA	NC_002516.2	5329977	5331458	-	1482	protein_coding	transcription elongation factor NusA&&sp|P0AFF8|NUSA_ECO57 Transcription termination/antitermination protein NusA OS=Escherichia coli O157:H7 OX=83334 GN=nusA PE=3 SV=1 && PF14520:Helix-hairpin-helix domain|PF13184:NusA-like KH domain|PF08529:NusA N-terminal domain|PF00575:S1 RNA binding domain	S1	NOT_CHANGE
PA4744	22240.7	34709.4	31381.7	13154.3	32666.3	36260.3	29444	27360.3	0.105892	0.777823	0.888477	infB	NC_002516.2	5327427	5329949	-	2523	protein_coding	translation initiation factor IF-2&&sp|Q02FS8|IF2_PSEAB Translation initiation factor IF-2 OS=Pseudomonas aeruginosa (strain UCBPP-PA14) OX=208963 GN=infB PE=3 SV=1 && PF08364:Bacterial translation initiation factor IF-2 associated region|PF04760:Translation initiation factor IF-2, N-terminal region|PF11987:Translation-initiation factor 2|PF00009:Elongation factor Tu GTP binding domain	GTP_EFTU	NOT_CHANGE
PA4743	888.171	1279.92	1272.99	423.904	1009.97	1128.7	1147.03	854.193	0.425444	0.243382	0.474379	rbfA	NC_002516.2	5326935	5327324	-	390	protein_coding	ribosome-binding factor A&&sp|Q02FS9|RBFA_PSEAB Ribosome-binding factor A OS=Pseudomonas aeruginosa (strain UCBPP-PA14) OX=208963 GN=rbfA PE=3 SV=1 && PF02033:Ribosome-binding factor A	-	NOT_CHANGE
PA4742	2309.64	2680.11	2491.12	1155.07	2043.79	2299.44	2493.62	1832.76	0.444348	0.110985	0.295946	truB	NC_002516.2	5326018	5326932	-	915	protein_coding	tRNA pseudouridine synthase B&&sp|P72154|TRUB_PSEAE tRNA pseudouridine synthase B OS=Pseudomonas aeruginosa (strain ATCC 15692 / DSM 22644 / CIP 104116 / JCM 14847 / LMG 12228 / 1C / PRS 101 / PAO1) OX=208964 GN=truB PE=3 SV=2 && PF16198:tRNA pseudouridylate synthase B C-terminal domain|PF09157:Pseudouridine synthase II TruB, C-terminal|PF01509:TruB family pseudouridylate synthase (N terminal dom…	-	NOT_CHANGE
PA4741	5078.64	7575.88	7623.43	4419.22	5478.07	4837.44	6759.32	4911.58	0.460677	0.0400171	0.160866	rpsO	NC_002516.2	5325653	5325922	-	270	protein_coding	30S ribosomal protein S15&&sp|A6VCJ8|RS15_PSEA7 30S ribosomal protein S15 OS=Pseudomonas aeruginosa (strain PA7) OX=381754 GN=rpsO PE=3 SV=1 && PF00312:Ribosomal protein S15	-	NOT_CHANGE
PA4740	22378.7	29223.1	25526	20117.9	27455.2	26049.5	25709.3	24540.9	0.0671075	0.742067	0.870199	pnp	NC_002516.2	5323374	5325479	-	2106	protein_coding	polynucleotide phosphorylase&&sp|B7V1F2|PNP_PSEA8 Polyribonucleotide nucleotidyltransferase OS=Pseudomonas aeruginosa (strain LESB58) OX=557722 GN=pnp PE=3 SV=1 && PF03726:Polyribonucleotide nucleotidyltransferase, RNA binding domain|PF01138:3' exoribonuclease family, domain 1|PF00575:S1 RNA binding domain|PF00013:KH domain|PF03725:3' exoribonuclease family, domain 2	RNase_PH	NOT_CHANGE
PA4739	259.255	419.47	245.283	428.646	359.546	396.202	308.003	394.798	-0.357772	0.172963	0.387389	PA4739	NC_002516.2	5322757	5323101	-	345	protein_coding	hypothetical protein&&-- && PF04972:BON domain	BON	NOT_CHANGE
PA4738	89.7043	136.89	117.984	193.46	137.333	107.195	114.859	145.996	-0.347454	0.248239	0.47881	PA4738	NC_002516.2	5322510	5322707	-	198	protein_coding	hypothetical protein&&sp|Q9HV61|Y4738_PSEAE UPF0337 protein PA4738 OS=Pseudomonas aeruginosa (strain ATCC 15692 / DSM 22644 / CIP 104116 / JCM 14847 / LMG 12228 / 1C / PRS 101 / PAO1) OX=208964 GN=PA4738 PE=1 SV=1 && PF05532:CsbD-like	-	NOT_CHANGE
PA4737	580.613	498.671	463.657	535.807	534.074	414.067	514.314	494.649	0.0558438	0.780218	0.888906	PA4737	NC_002516.2	5322136	5322450	+	315	protein_coding	hypothetical protein&&-- && PF11006:Protein of unknown function (DUF2845)	-	NOT_CHANGE
PA4736	681.161	517.249	502.985	810.823	598.926	534.925	567.131	648.224	-0.193037	0.42413	0.64622	PA4736	NC_002516.2	5321846	5322139	+	294	protein_coding	hypothetical protein&&-- && PF11006:Protein of unknown function (DUF2845)	-	NOT_CHANGE
PA4735	4285.1	3765.45	3643.02	4200.16	4358.42	4034.53	3897.86	4197.7	-0.106924	0.472042	0.686043	PA4735	NC_002516.2	5318575	5321841	+	3267	protein_coding	hypothetical protein&&-- && PF05359:Domain of Unknown Function (DUF748)	-	NOT_CHANGE
PA4734	449.507	393.07	398.455	627.795	506.417	452.952	413.677	529.055	-0.355329	0.076195	0.235815	PA4734	NC_002516.2	5317569	5318450	+	882	protein_coding	hypothetical protein&&-- && PF09995:Uncharacterized protein conserved in bacteria (DUF2236)	-	NOT_CHANGE
PA4733	749.178	1004.19	935.593	1230.93	1237.91	1004.69	896.319	1157.84	-0.369574	0.0620082	0.208493	acsB	NC_002516.2	5315534	5317471	+	1938	protein_coding	acetyl-CoA synthetase&&sp|Q9HV66|ACSA2_PSEAE Acetyl-coenzyme A synthetase 2 OS=Pseudomonas aeruginosa (strain ATCC 15692 / DSM 22644 / CIP 104116 / JCM 14847 / LMG 12228 / 1C / PRS 101 / PAO1) OX=208964 GN=acsA2 PE=3 SV=1 && PF00501:AMP-binding enzyme|PF16177:Acetyl-coenzyme A synthetase N-terminus|PF13193:AMP-binding enzyme C-terminal domain	AMP-binding	NOT_CHANGE
PA4732	3171.19	2900.11	2589.44	2895.25	2967.93	2913.19	2886.91	2925.46	-0.0190855	0.900615	0.951076	pgi	NC_002516.2	5313676	5315340	+	1665	protein_coding	glucose-6-phosphate isomerase&&sp|B7V1E4|G6PI_PSEA8 Glucose-6-phosphate isomerase OS=Pseudomonas aeruginosa (strain LESB58) OX=557722 GN=pgi PE=3 SV=1 && PF00342:Phosphoglucose isomerase	-	NOT_CHANGE
PA4731	276.999	308.98	316.694	143.198	261.315	220.696	300.891	208.403	0.530127	0.0437223	0.16999	panD	NC_002516.2	5313206	5313586	+	381	protein_coding	aspartate alpha-decarboxylase&&sp|Q9HV68|PAND_PSEAE Aspartate 1-decarboxylase OS=Pseudomonas aeruginosa (strain ATCC 15692 / DSM 22644 / CIP 104116 / JCM 14847 / LMG 12228 / 1C / PRS 101 / PAO1) OX=208964 GN=panD PE=3 SV=1 && PF02261:Aspartate decarboxylase	-	NOT_CHANGE
PA4730	868.455	812.54	827.958	452.354	754.379	852.306	836.318	686.347	0.28547	0.279374	0.512625	panC	NC_002516.2	5312261	5313112	+	852	protein_coding	pantoate--beta-alanine ligase&&sp|Q02FU2|PANC_PSEAB Pantothenate synthetase OS=Pseudomonas aeruginosa (strain UCBPP-PA14) OX=208963 GN=panC PE=3 SV=1 && PF02569:Pantoate-beta-alanine ligase	-	NOT_CHANGE
PA4729	1014.35	949.43	983.201	574.689	929.861	931.126	982.326	811.892	0.275142	0.245639	0.476156	panB	NC_002516.2	5311464	5312264	+	801	protein_coding	3-methyl-2-oxobutanoate hydroxymethyltransferase&&sp|Q9HV70|PANB2_PSEAE 3-methyl-2-oxobutanoate hydroxymethyltransferase 2 OS=Pseudomonas aeruginosa (strain ATCC 15692 / DSM 22644 / CIP 104116 / JCM 14847 / LMG 12228 / 1C / PRS 101 / PAO1) OX=208964 GN=panB2 PE=3 SV=1 && PF02548:Ketopantoate hydroxymethyltransferase	-	NOT_CHANGE
PA4728	325.301	250.313	317.729	143.198	267.991	258.529	297.781	223.239	0.41615	0.149539	0.356013	folK	NC_002516.2	5310726	5311214	+	489	protein_coding	2-amino-4-hydroxy-6-hydroxymethyldihydropteridine pyrophosphokinase&&sp|Q9HV71|HPPK_PSEAE 2-amino-4-hydroxy-6-hydroxymethyldihydropteridine pyrophosphokinase OS=Pseudomonas aeruginosa (strain ATCC 15692 / DSM 22644 / CIP 104116 / JCM 14847 / LMG 12228 / 1C / PRS 101 / PAO1) OX=208964 GN=folK PE=3 SV=1 && PF01288:7,8-dihydro-6-hydroxymethylpterin-pyrophosphokinase (HPPK)	-	NOT_CHANGE
PA4727	3242.17	2710.42	2612.21	2197.28	2707.56	2753.44	2854.93	2552.76	0.161486	0.383138	0.609515	pcnB	NC_002516.2	5309326	5310729	+	1404	protein_coding	poly(A) polymerase&&sp|Q8ZRQ8|PCNB_SALTY Poly(A) polymerase I OS=Salmonella typhimurium (strain LT2 / SGSC1412 / ATCC 700720) OX=99287 GN=pcnB PE=3 SV=2 && PF12627:Probable RNA and SrmB- binding site of polymerase A|PF01743:Poly A polymerase head domain|PF12626:Polymerase A arginine-rich C-terminus	-	NOT_CHANGE
PA4726_2	9485.98	13697.8	13726.5	20700.2	11603.7	13115.6	12303.4	15139.8	-0.299301	0.29132	0.52357	PA4726_2	NC_002516.2	5308743	5308964	-	222	protein_coding	P30&&-- && -	-	NOT_CHANGE
PA4726_11	80370.1	122373	112878	162083	102679	110476	105207	125079	-0.249616	0.342769	0.574658	crcZ	NC_002516.2	5308587	5308993	+	407	protein_coding	CrcZ&&-- && -	-	NOT_CHANGE
PA4726_1	2.95728	3.91114	4.13979	6.63832	2.86111	4.20373	3.66941	4.56772	-0.319715	0.696698	1	PA4726_1	NC_002516.2	5308433	5308493	+	61	protein_coding	P36&&-- && -	-	NOT_CHANGE
PA4726	4865.72	5548.93	4907.72	4196.36	5259.67	5546.82	5107.46	5000.95	0.0304589	0.866435	0.934794	cbrB	NC_002516.2	5306989	5308425	+	1437	protein_coding	two-component response regulator CbrB&&sp|P25852|ZRAR_SALTY Transcriptional regulatory protein ZraR OS=Salmonella typhimurium (strain LT2 / SGSC1412 / ATCC 700720) OX=99287 GN=zraR PE=1 SV=2 && PF00158:Sigma-54 interaction domain|PF00072:Response regulator receiver domain	Sigma54_activat	NOT_CHANGE
PA4725	1037.02	859.473	798.98	725.473	1020.46	827.084	898.491	857.673	0.0671146	0.752278	0.874821	cbrA	NC_002516.2	5304011	5306962	+	2952	protein_coding	two-component sensor CbrA&&sp|P16497|KINA_BACSU Sporulation kinase A OS=Bacillus subtilis (strain 168) OX=224308 GN=kinA PE=1 SV=2 && PF00989:PAS fold|PF02518:Histidine kinase-, DNA gyrase B-, and HSP90-like ATPase|PF00512:His Kinase A (phospho-acceptor) domain	HATPase_c	NOT_CHANGE
PA4724_1	19.7152	31.2891	26.9086	13.2766	21.9352	22.0696	25.971	19.0938	0.447094	0.273251	0.507168	PA4724_1	NC_002516.2	5303851	5304027	+	177	protein_coding	hypothetical protein&&-- && -	-	NOT_CHANGE
PA4724	249.398	211.202	205.955	92.9364	164.991	173.404	222.185	143.777	0.629287	0.0263942	0.123301	PA4724	NC_002516.2	5302900	5303781	+	882	protein_coding	glutamyl-Q tRNA(Asp) synthetase&&sp|Q9HV75|GLUQ_PSEAE Glutamyl-Q tRNA(Asp) synthetase OS=Pseudomonas aeruginosa (strain ATCC 15692 / DSM 22644 / CIP 104116 / JCM 14847 / LMG 12228 / 1C / PRS 101 / PAO1) OX=208964 GN=gluQ PE=3 SV=1 && PF00749:tRNA synthetases class I (E and Q), catalytic domain	-	NOT_CHANGE
PA4723	3525.08	3782.07	3716.5	1775.28	2234.53	2634.69	3674.55	2214.83	0.730517	0.000250192	0.00452756	dksA	NC_002516.2	5302386	5302832	+	447	protein_coding	suppressor protein DksA&&sp|P0ABS3|DKSA_ECO57 RNA polymerase-binding transcription factor DksA OS=Escherichia coli O157:H7 OX=83334 GN=dksA PE=3 SV=1 && PF01258:Prokaryotic dksA/traR C4-type zinc finger	zf-dskA_traR	NOT_CHANGE
PA4722	1173.06	847.74	919.034	915.139	975.639	1059.34	979.943	983.373	-0.00486615	0.980186	0.991103	PA4722	NC_002516.2	5301021	5302193	-	1173	protein_coding	hypothetical protein&&sp|P96847|AVTA_MYCTU Valine--pyruvate aminotransferase OS=Mycobacterium tuberculosis (strain ATCC 25618 / H37Rv) OX=83332 GN=aspB PE=1 SV=2 && PF00155:Aminotransferase class I and II	Aminotran_1_2	NOT_CHANGE
PA4721	629.901	561.249	505.055	372.694	494.972	505.499	565.402	457.722	0.305327	0.139519	0.340332	PA4721	NC_002516.2	5300314	5301021	-	708	protein_coding	sugar fermentation stimulation protein A&&sp|Q9HV77|SFSA_PSEAE Sugar fermentation stimulation protein homolog OS=Pseudomonas aeruginosa (strain ATCC 15692 / DSM 22644 / CIP 104116 / JCM 14847 / LMG 12228 / 1C / PRS 101 / PAO1) OX=208964 GN=sfsA PE=3 SV=1 && PF03749:Sugar fermentation stimulation protein RE domain|PF17746:SfsA N-terminal OB domain	SfsA	NOT_CHANGE
PA4720	629.901	651.205	656.157	250.359	444.426	531.772	645.754	408.852	0.660001	0.0226391	0.112617	trmA	NC_002516.2	5299189	5300280	+	1092	protein_coding	tRNA (uracil-5-)-methyltransferase&&sp|Q9HV78|TRMA_PSEAE tRNA/tmRNA (uracil-C(5))-methyltransferase OS=Pseudomonas aeruginosa (strain ATCC 15692 / DSM 22644 / CIP 104116 / JCM 14847 / LMG 12228 / 1C / PRS 101 / PAO1) OX=208964 GN=trmA PE=3 SV=1 && PF05958:tRNA (Uracil-5-)-methyltransferase	-	NOT_CHANGE
PA4719	373.603	392.092	377.756	182.08	259.407	340.502	381.15	260.663	0.54936	0.0350339	0.148275	PA4719	NC_002516.2	5297897	5299192	+	1296	protein_coding	transporter&&sp|P31466|ADEP_ECOLI Adenine permease AdeP OS=Escherichia coli (strain K12) OX=83333 GN=adeP PE=1 SV=2 && PF00860:Permease family	-	NOT_CHANGE
PA4718	421.906	446.848	436.748	389.764	461.592	382.54	435.167	411.299	0.0810254	0.635149	0.802194	PA4718	NC_002516.2	5297007	5297483	-	477	protein_coding	hypothetical protein&&-- && -	-	NOT_CHANGE
PA4717	906.9	792.006	763.792	1025.15	931.768	880.682	820.899	945.865	-0.204521	0.21849	0.445904	PA4717	NC_002516.2	5296092	5296985	+	894	protein_coding	hypothetical protein&&sp|P64431|YPFJ_ECO57 Uncharacterized protein YpfJ OS=Escherichia coli O157:H7 OX=83334 GN=ypfJ PE=4 SV=1 && PF04228:Putative neutral zinc metallopeptidase	-	NOT_CHANGE
PA4716	715.663	608.183	583.711	699.868	626.583	602.184	635.852	642.879	-0.0159538	0.927488	0.965008	PA4716	NC_002516.2	5295170	5296024	+	855	protein_coding	hypothetical protein&&sp|Q51792|PHZF_PSEFL Trans-2,3-dihydro-3-hydroxyanthranilate isomerase OS=Pseudomonas fluorescens OX=294 GN=phzF PE=1 SV=1 && PF02567:Phenazine biosynthesis-like protein	-	NOT_CHANGE
PA4715	889.156	904.452	948.012	735.905	861.194	1045.68	913.873	880.926	0.0533231	0.782454	0.890038	PA4715	NC_002516.2	5293765	5295000	-	1236	protein_coding	aminotransferase&&sp|P77434|ALAC_ECOLI Glutamate-pyruvate aminotransferase AlaC OS=Escherichia coli (strain K12) OX=83333 GN=alaC PE=1 SV=1 && PF00155:Aminotransferase class I and II	Aminotran_1_2	NOT_CHANGE
PA4714	782.694	563.204	622.004	1488.88	915.555	987.877	655.967	1130.77	-0.785712	0.00246607	0.0252494	PA4714	NC_002516.2	5293257	5293706	+	450	protein_coding	hypothetical protein&&-- && PF04214:Protein of unknown function, DUF	-	NOT_CHANGE
PA4713	104.491	105.601	91.0754	151.733	125.889	114.552	100.389	130.724	-0.381614	0.0941478	0.271048	PA4713	NC_002516.2	5292558	5293007	-	450	protein_coding	hypothetical protein&&-- && PF14248:Domain of unknown function (DUF4345)	-	NOT_CHANGE
PA4712	89.7043	146.668	93.1453	102.42	103.954	102.991	109.839	103.122	0.091879	0.734618	0.867432	PA4712	NC_002516.2	5292042	5292554	+	513	protein_coding	hypothetical protein&&-- && PF13590:Domain of unknown function (DUF4136)	-	NOT_CHANGE
PA4711	204.053	224.891	208.025	161.216	180.25	193.372	212.323	178.279	0.253147	0.18044	0.397088	PA4711	NC_002516.2	5291614	5291961	+	348	protein_coding	hypothetical protein&&-- && PF00355:Rieske [2Fe-2S] domain	-	NOT_CHANGE
PA4710	59.1457	95.823	136.613	76.8148	83.9259	99.8386	97.1939	86.8598	0.161975	0.632127	0.800724	phuR	NC_002516.2	5289217	5291511	+	2295	protein_coding	heme/hemoglobin uptake outer membrane receptor PhuR&&sp|Q56989|HMUR_YERPE Hemin receptor OS=Yersinia pestis OX=632 GN=hmuR PE=3 SV=1 && PF00593:TonB dependent receptor|PF07715:TonB-dependent Receptor Plug Domain	TonB_dep_Rec	NOT_CHANGE
PA4709	33.5159	63.5561	61.0619	29.3983	57.2222	70.4125	52.7113	52.3443	0.0123698	0.975763	0.989018	PA4709	NC_002516.2	5287972	5289036	-	1065	protein_coding	hemin degrading factor&&sp|Q56990|HMUS_YERPE Hemin transport protein HmuS OS=Yersinia pestis OX=632 GN=hmuS PE=4 SV=2 && PF05171:Haemin-degrading HemS.ChuX domain	-	NOT_CHANGE
PA4708	219.825	237.602	307.38	272.171	258.454	279.548	254.935	270.058	-0.0835865	0.686894	0.8346	phuT	NC_002516.2	5287069	5287962	-	894	protein_coding	heme-transporter PhuT&&sp|Q56991|HMUT_YERPE Hemin-binding periplasmic protein HmuT OS=Yersinia pestis OX=632 GN=hmuT PE=1 SV=2 && PF01497:Periplasmic binding protein	Peripla_BP_2	NOT_CHANGE
PA4707	121.249	110.49	122.124	112.851	123.028	117.704	117.954	117.861	0.000849329	0.996692	0.997921	PA4707	NC_002516.2	5286035	5287018	-	984	protein_coding	ABC transporter permease&&sp|Q56992|HMUU_YERPE Hemin transport system permease protein HmuU OS=Yersinia pestis OX=632 GN=hmuU PE=1 SV=2 && PF01032:FecCD transport family	-	NOT_CHANGE
PA4706	83.7897	88.9785	90.0405	59.7449	100.139	83.0237	87.6029	80.9691	0.113909	0.674402	0.828477	PA4706	NC_002516.2	5285268	5286035	-	768	protein_coding	hemin importer ATP-binding subunit&&sp|Q02FW7|HMUV_PSEAB Hemin import ATP-binding protein HmuV OS=Pseudomonas aeruginosa (strain UCBPP-PA14) OX=208963 GN=hmuV PE=3 SV=1 && PF00005:ABC transporter	ABC_tran	NOT_CHANGE
PA4705	230.668	229.78	216.304	193.46	245.102	168.149	225.584	202.237	0.156634	0.469555	0.683869	PA4705	NC_002516.2	5284370	5285257	-	888	protein_coding	hypothetical protein&&-- && PF04187:Haem-binding uptake, Tiki superfamily, ChaN	-	NOT_CHANGE
PA4704_2	12.8149	7.82228	8.27958	6.63832	14.3056	1.05093	9.63892	7.3316	0.382872	0.610499	1	prrF2	NC_002516.2	5284172	5284319	+	148	protein_coding	regulatory RNA PrrF2&&-- && -	-	NOT_CHANGE
PA4704_1	12.8149	12.7112	9.31453	10.4316	15.2593	4.20373	11.6135	9.96488	0.211979	0.714149	1	prrF1	NC_002516.2	5283960	5284110	+	151	protein_coding	regulatory RNA PrrF1&&-- && -	-	NOT_CHANGE
PA4704	150.821	107.556	121.089	131.818	123.981	116.654	126.489	124.151	0.0263732	0.908309	0.955681	cbpA	NC_002516.2	5283109	5283906	+	798	protein_coding	cAMP-binding protein A&&-- && PF00027:Cyclic nucleotide-binding domain	cNMP_binding	NOT_CHANGE
PA4703	39.4304	55.7338	36.2232	98.6264	74.3889	75.6672	43.7958	82.8941	-0.919726	0.00186729	0.0207202	PA4703	NC_002516.2	5282732	5283004	+	273	protein_coding	hypothetical protein&&-- && PF04994:TfoX C-terminal domain	-	NOT_CHANGE
PA4702	150.821	200.446	224.584	432.439	220.305	337.349	191.95	330.031	-0.782157	0.00977404	0.0652172	PA4702	NC_002516.2	5282159	5282506	+	348	protein_coding	hypothetical protein&&-- && PF00805:Pentapeptide repeats (8 copies)	Pentapeptide	NOT_CHANGE
PA4701	2200.22	1956.55	1789.43	1132.31	1517.34	1837.03	1982.06	1495.56	0.406543	0.0782867	0.239432	PA4701	NC_002516.2	5280505	5282067	+	1563	protein_coding	hypothetical protein&&-- && PF13671:AAA domain	-	NOT_CHANGE
PA4700	1601.86	1344.46	1409.6	805.133	1243.63	1297.9	1451.97	1115.55	0.380445	0.107496	0.290338	mrcB	NC_002516.2	5277968	5280292	-	2325	protein_coding	penicillin-binding protein 1B&&sp|Q9KUC0|PBPB_VIBCH Penicillin-binding protein 1B OS=Vibrio cholerae serotype O1 (strain ATCC 39315 / El Tor Inaba N16961) OX=243277 GN=mrcB PE=3 SV=1 && PF14814:Bifunctional transglycosylase second domain|PF00905:Penicillin binding protein transpeptidase domain|PF00912:Transglycosylase	-	NOT_CHANGE
PA4699	1064.62	914.229	1000.79	613.57	770.592	809.218	993.215	731.127	0.442258	0.0175742	0.0966936	PA4699	NC_002516.2	5277172	5277951	-	780	protein_coding	hypothetical protein&&-- && -	-	NOT_CHANGE
PA4698	302.629	238.58	289.785	184.925	196.463	200.728	276.998	194.039	0.51363	0.00777288	0.056515	PA4698	NC_002516.2	5276843	5277172	-	330	protein_coding	hypothetical protein&&sp|Q57152|Y1436_HAEIN Uncharacterized protein HI_1436 OS=Haemophilus influenzae (strain ATCC 51907 / DSM 11121 / KW20 / Rd) OX=71421 GN=HI_1436 PE=4 SV=1 && PF04287:tRNA pseudouridine synthase C	-	NOT_CHANGE
PA4697	928.587	1176.28	1022.53	980.574	924.139	1049.88	1042.46	984.865	0.0821886	0.63325	0.801085	PA4697	NC_002516.2	5276283	5276735	+	453	protein_coding	hypothetical protein&&-- && PF13511:Domain of unknown function (DUF4124)	-	NOT_CHANGE
PA4696	3579.3	3583.58	3083.11	3099.15	5092.78	4279.4	3415.33	4157.11	-0.283523	0.218229	0.445538	ilvI	NC_002516.2	5274008	5275732	-	1725	protein_coding	acetolactate synthase 3 catalytic subunit&&sp|P00893|ILVI_ECOLI Acetolactate synthase isozyme 3 large subunit OS=Escherichia coli (strain K12) OX=83333 GN=ilvI PE=1 SV=2 && PF00205:Thiamine pyrophosphate enzyme, central domain|PF02775:Thiamine pyrophosphate enzyme, C-terminal TPP binding domain|PF02776:Thiamine pyrophosphate enzyme, N-terminal TPP binding domain	TPP_enzyme_N	NOT_CHANGE
PA4695	1201.64	1349.34	1142.58	975.833	1862.58	1463.95	1231.19	1434.12	-0.220057	0.40725	0.630793	ilvH	NC_002516.2	5273514	5274005	-	492	protein_coding	acetolactate synthase small subunit&&sp|P21622|ILVH_SALTY Acetolactate synthase isozyme 3 small subunit OS=Salmonella typhimurium (strain LT2 / SGSC1412 / ATCC 700720) OX=99287 GN=ilvH PE=3 SV=2 && PF13710:ACT domain|PF10369:Small subunit of acetolactate synthase	-	NOT_CHANGE
PA4694	7354.76	8812.78	8402.74	9812.38	9240.43	10058.5	8190.1	9703.76	-0.244656	0.105756	0.288603	ilvC	NC_002516.2	5272455	5273471	-	1017	protein_coding	ketol-acid reductoisomerase&&sp|B7V1A6|ILVC_PSEA8 Ketol-acid reductoisomerase (NADP(+)) OS=Pseudomonas aeruginosa (strain LESB58) OX=557722 GN=ilvC PE=3 SV=1 && PF07991:Acetohydroxy acid isomeroreductase, NADPH-binding domain|PF01450:Acetohydroxy acid isomeroreductase, catalytic domain	-	NOT_CHANGE
PA4693	2254.44	1855.84	1857.73	1817.95	1566.93	1575.35	1989.33	1653.41	0.266802	0.121799	0.313388	pssA	NC_002516.2	5271485	5272300	-	816	protein_coding	phosphatidylserine synthase&&sp|Q48269|PSS_HELPY CDP-diacylglycerol--serine O-phosphatidyltransferase OS=Helicobacter pylori (strain ATCC 700392 / 26695) OX=85962 GN=pssA PE=3 SV=2 && PF01066:CDP-alcohol phosphatidyltransferase	CDP-OH_P_transf	NOT_CHANGE
PA4692	278.97	294.313	237.003	488.39	324.259	306.872	270.096	373.174	-0.466662	0.0622459	0.208777	PA4692	NC_002516.2	5270411	5271424	-	1014	protein_coding	sulfite oxidase subunit YedY&&sp|Q9HVA4|MSRP_PSEAE Protein-methionine-sulfoxide reductase catalytic subunit MsrP OS=Pseudomonas aeruginosa (strain ATCC 15692 / DSM 22644 / CIP 104116 / JCM 14847 / LMG 12228 / 1C / PRS 101 / PAO1) OX=208964 GN=msrP PE=3 SV=1 && PF00174:Oxidoreductase molybdopterin binding domain	-	NOT_CHANGE
PA4691	115.334	107.556	121.089	166.906	137.333	162.895	114.66	155.711	-0.441517	0.0345573	0.146714	PA4691	NC_002516.2	5269803	5270411	-	609	protein_coding	sulfite oxidase subunit YedZ&&sp|Q9HVA5|MSRQ_PSEAE Protein-methionine-sulfoxide reductase heme-binding subunit MsrQ OS=Pseudomonas aeruginosa (strain ATCC 15692 / DSM 22644 / CIP 104116 / JCM 14847 / LMG 12228 / 1C / PRS 101 / PAO1) OX=208964 GN=msrQ PE=3 SV=1 && PF01794:Ferric reductase like transmembrane component	Ferric_reduct	NOT_CHANGE
PA4690a	260.241	293.336	251.492	329.071	302.324	296.363	268.356	309.253	-0.204641	0.244158	0.474643	PA4690a	NC_002516.2	5263249	5263956	-	708	protein_coding	paraquat-inducible protein A&&sp|P0AD04|YEBS_ECO57 Intermembrane transport protein YebS OS=Escherichia coli O157:H7 OX=83334 GN=yebS PE=3 SV=1 && PF04403:Paraquat-inducible protein A	-	NOT_CHANGE
PA4690_5	0	1.95557	19.664	0.948331	0.953703	0	7.20653	0.634011	3.47455	0.0346429	1	PA4690_5	NC_002516.2	5267724	5269259	-	1536	protein_coding	16S ribosomal RNA&&-- && -	-	NOT_CHANGE
PA4690_2	1.97152	0.977785	56.9221	0.948331	0	6.3056	19.9571	2.41798	3.05392	0.141197	1	PA4690_2	NC_002516.2	5264362	5267252	-	2891	protein_coding	23S ribosomal RNA&&sp|Q3BAI2|YCX91_PHAAO Uncharacterized protein ORF91 OS=Phalaenopsis aphrodite subsp. formosana OX=308872 PE=4 SV=1 && -	-	NOT_CHANGE
PA4690	205.038	196.535	173.871	202.943	195.509	182.862	191.815	193.771	-0.0147286	0.937592	0.969082	PA4690	NC_002516.2	5262642	5263262	-	621	protein_coding	hypothetical protein&&sp|P0AFM0|PQIA_ECOL6 Intermembrane transport protein PqiA OS=Escherichia coli O6:H1 (strain CFT073 / ATCC 700928 / UPEC) OX=199310 GN=pqiA PE=3 SV=1 && PF04403:Paraquat-inducible protein A	-	NOT_CHANGE
PA4689	1455.97	1354.23	1237.8	975.833	1047.17	1008.9	1349.33	1010.63	0.417079	0.00596153	0.047405	PA4689	NC_002516.2	5260343	5262649	-	2307	protein_coding	hypothetical protein&&sp|P76272|YEBT_ECOLI Intermembrane transport protein YebT OS=Escherichia coli (strain K12) OX=83333 GN=yebT PE=1 SV=2 && PF02470:MlaD protein	-	NOT_CHANGE
PA4688	315.444	574.938	594.06	314.846	351.917	441.392	494.814	369.385	0.422037	0.151521	0.358373	hitB	NC_002516.2	5258724	5260262	+	1539	protein_coding	iron (III)-transporter permease HitB&&sp|P71338|FBPB2_HAEIN Fe(3+)-transport system permease protein FbpB 2 OS=Haemophilus influenzae (strain ATCC 51907 / DSM 11121 / KW20 / Rd) OX=71421 GN=fbpB2 PE=3 SV=2 && PF00528:Binding-protein-dependent transport system inner membrane component	BPD_transp_1	NOT_CHANGE
PA4687	1098.14	2171.66	2182.71	1609.32	1887.38	2122.88	1817.5	1873.19	-0.0435233	0.883909	0.94442	hitA	NC_002516.2	5257696	5258703	+	1008	protein_coding	ferric iron-binding periplasmic protein HitA&&sp|P35755|FBPA_HAEIN Iron-utilization periplasmic protein OS=Haemophilus influenzae (strain ATCC 51907 / DSM 11121 / KW20 / Rd) OX=71421 GN=fbpA PE=1 SV=3 && PF13343:Bacterial extracellular solute-binding protein	-	NOT_CHANGE
PA4686	1753.67	2446.42	2221	404.937	1614.62	1566.94	2140.36	1195.5	0.840333	0.0612508	0.207483	PA4686	NC_002516.2	5254738	5257584	+	2847	protein_coding	hypothetical protein&&-- && -	-	NOT_CHANGE
PA4684	375.575	303.114	316.694	139.405	218.398	257.479	331.794	205.094	0.695207	0.0101804	0.0672968	PA4684	NC_002516.2	5252758	5254056	+	1299	protein_coding	hypothetical protein&&-- && -	-	NOT_CHANGE
PA4683	1570.32	867.296	987.34	986.264	944.166	921.668	1141.65	950.7	0.264068	0.310686	0.543975	PA4683	NC_002516.2	5251871	5252473	-	603	protein_coding	hypothetical protein&&-- && -	-	NOT_CHANGE
PA4682	317.415	274.758	276.331	298.724	307.093	301.618	289.501	302.478	-0.0631339	0.711696	0.852001	PA4682	NC_002516.2	5250620	5251666	-	1047	protein_coding	hypothetical protein&&-- && -	-	NOT_CHANGE
PA4681	153.779	147.646	110.739	133.715	141.148	145.029	137.388	139.964	-0.0254604	0.909198	0.955968	PA4681	NC_002516.2	5249599	5250618	-	1020	protein_coding	hypothetical protein&&-- && -	-	NOT_CHANGE
PA4680	36.4732	44.9781	23.8038	47.4165	45.7778	40.9864	35.085	44.7269	-0.34852	0.297447	0.529994	PA4680	NC_002516.2	5249032	5249568	-	537	protein_coding	hypothetical protein&&-- && -	-	NOT_CHANGE
PA4679	440.635	370.581	443.993	330.019	377.667	409.864	418.403	372.517	0.167935	0.369533	0.597284	PA4679	NC_002516.2	5248071	5248772	-	702	protein_coding	hypothetical protein&&-- && -	-	NOT_CHANGE
PA4678	157.722	145.69	165.592	96.7298	152.593	122.959	156.334	124.094	0.332979	0.170791	0.384566	rimI	NC_002516.2	5247622	5248074	-	453	protein_coding	peptide n-acetyltransferase RimI&&sp|O05517|RIMI_BACSU Putative [ribosomal protein S18]-alanine N-acetyltransferase OS=Bacillus subtilis (strain 168) OX=224308 GN=rimI PE=3 SV=1 && PF00583:Acetyltransferase (GNAT) family	Acetyltransf_1	NOT_CHANGE
PA4677	530.339	590.582	555.767	479.855	435.842	491.837	558.896	469.178	0.252733	0.112235	0.297675	PA4677	NC_002516.2	5246185	5247423	-	1239	protein_coding	hypothetical protein&&sp|Q96FV2|SCRN2_HUMAN Secernin-2 OS=Homo sapiens OX=9606 GN=SCRN2 PE=1 SV=3 && PF03577:Peptidase family C69	-	NOT_CHANGE
PA4676	636.802	690.317	781.386	383.126	534.074	674.699	702.835	530.633	0.405937	0.106746	0.289508	PA4676	NC_002516.2	5245476	5246123	-	648	protein_coding	carbonic anhydrase&&sp|P61517|CAN_ECOLI Carbonic anhydrase 2 OS=Escherichia coli (strain K12) OX=83333 GN=can PE=1 SV=1 && PF00484:Carbonic anhydrase	-	NOT_CHANGE
PA4675	589.485	1364.01	1263.67	249.411	819.231	662.088	1072.39	576.91	0.894487	0.0476267	0.178021	PA4675	NC_002516.2	5243178	5245406	+	2229	protein_coding	TonB-dependent receptor&&sp|Q6U607|IUTA_KLEPN Ferric aerobactin receptor OS=Klebsiella pneumoniae OX=573 GN=iutA PE=1 SV=1 && PF07715:TonB-dependent Receptor Plug Domain|PF00593:TonB dependent receptor	TonB_dep_Rec	NOT_CHANGE
PA4674	295.728	617.96	606.48	608.828	562.685	452.952	506.723	541.489	-0.0960494	0.758934	0.878434	PA4674	NC_002516.2	5242254	5242559	-	306	protein_coding	hypothetical protein&&sp|Q46560|VAPI_DICNO Virulence-associated protein I OS=Dichelobacter nodosus OX=870 GN=vapI PE=3 SV=1 && PF01381:Helix-turn-helix	HTH_3	NOT_CHANGE
PA4673_1	0	0.977785	0	5.68999	1.90741	0	0.325928	2.53246	-2.83379	0.13112	1	PA4673_1	NC_002516.2	5242026	5242102	+	77	protein_coding	tRNA-Met&&-- && -	-	NOT_CHANGE
PA4673	1535.82	1897.88	1922.93	354.676	1294.18	1152.87	1785.54	933.908	0.935108	0.0258502	0.121385	PA4673	NC_002516.2	5240747	5241847	+	1101	protein_coding	GTP-dependent nucleic acid-binding protein EngD&&sp|P44681|YCHF_HAEIN Ribosome-binding ATPase YchF OS=Haemophilus influenzae (strain ATCC 51907 / DSM 11121 / KW20 / Rd) OX=71421 GN=ychF PE=1 SV=2 && PF01926:50S ribosome-binding GTPase|PF06071:Protein of unknown function (DUF933)	-	NOT_CHANGE
PA4672	672.289	682.494	647.877	131.818	463.5	386.743	667.554	327.354	1.0283	0.0106498	0.0695558	PA4672	NC_002516.2	5240122	5240706	+	585	protein_coding	peptidyl-tRNA hydrolase&&sp|B7V0L8|PTH_PSEA8 Peptidyl-tRNA hydrolase OS=Pseudomonas aeruginosa (strain LESB58) OX=557722 GN=pth PE=3 SV=1 && PF01195:Peptidyl-tRNA hydrolase	-	NOT_CHANGE
PA4671	12656.2	22099.9	22027.8	4292.15	13765.8	13776.7	18928	10611.5	0.834896	0.0521652	0.187235	PA4671	NC_002516.2	5239466	5240080	+	615	protein_coding	50S ribosomal protein L25/general stress protein Ctc&&sp|B7V0L7|RL25_PSEA8 50S ribosomal protein L25 OS=Pseudomonas aeruginosa (strain LESB58) OX=557722 GN=rplY PE=3 SV=1 && PF01386:Ribosomal L25p family|PF14693:Ribosomal protein TL5, C-terminal domain	-	NOT_CHANGE
PA4670	5447.32	4522.26	5015.36	1416.81	3326.52	3799.12	4994.98	2847.48	0.810857	0.020089	0.104612	prs	NC_002516.2	5238408	5239349	+	942	protein_coding	ribose-phosphate pyrophosphokinase&&sp|Q9HVC5|KPRS_PSEAE Ribose-phosphate pyrophosphokinase OS=Pseudomonas aeruginosa (strain ATCC 15692 / DSM 22644 / CIP 104116 / JCM 14847 / LMG 12228 / 1C / PRS 101 / PAO1) OX=208964 GN=prs PE=3 SV=1 && PF13793:N-terminal domain of ribose phosphate pyrophosphokinase|PF14572:Phosphoribosyl synthetase-associated domain	-	NOT_CHANGE
PA4669_1	235.597	168.179	197.675	115.696	228.889	130.316	200.484	158.3	0.340136	0.278843	0.512625	PA4669_1	NC_002516.2	5238277	5238351	+	75	protein_coding	tRNA-Gln&&-- && -	-	NOT_CHANGE
PA4669	2531.43	2161.88	2450.76	2010.46	2560.69	2120.78	2381.36	2230.65	0.094263	0.594264	0.77416	ipk	NC_002516.2	5237393	5238241	+	849	protein_coding	4-diphosphocytidyl-2C-methyl-D-erythritol kinase&&sp|P42805|ISPE_PSEAE 4-diphosphocytidyl-2-C-methyl-D-erythritol kinase OS=Pseudomonas aeruginosa (strain ATCC 15692 / DSM 22644 / CIP 104116 / JCM 14847 / LMG 12228 / 1C / PRS 101 / PAO1) OX=208964 GN=ispE PE=3 SV=2 && PF00288:GHMP kinases N terminal domain	GHMP_kinases	NOT_CHANGE
PA4668	638.773	457.604	513.334	272.171	369.083	346.808	536.57	329.354	0.704394	0.00165412	0.0190889	PA4668	NC_002516.2	5236774	5237391	+	618	protein_coding	molecular chaperone LolB&&sp|B7V0L4|LOLB_PSEA8 Outer-membrane lipoprotein LolB OS=Pseudomonas aeruginosa (strain LESB58) OX=557722 GN=lolB PE=3 SV=1 && PF03550:Outer membrane lipoprotein LolB	-	NOT_CHANGE
PA4667	4396.49	3791.85	3686.48	3318.21	3374.2	3356.68	3958.28	3349.7	0.240867	0.107157	0.290101	PA4667	NC_002516.2	5234997	5236769	+	1773	protein_coding	hypothetical protein&&sp|P42810|Y4667_PSEAE TPR repeat-containing protein PA4667 OS=Pseudomonas aeruginosa (strain ATCC 15692 / DSM 22644 / CIP 104116 / JCM 14847 / LMG 12228 / 1C / PRS 101 / PAO1) OX=208964 GN=PA4667 PE=4 SV=2 && PF14559:Tetratricopeptide repeat|PF13432:Tetratricopeptide repeat	-	NOT_CHANGE
PA4666	1115.88	895.652	1043.23	481.752	739.12	942.687	1018.25	721.186	0.498019	0.0702178	0.222759	hemA	NC_002516.2	5233585	5234853	-	1269	protein_coding	glutamyl-tRNA reductase&&sp|B7V0L2|HEM1_PSEA8 Glutamyl-tRNA reductase OS=Pseudomonas aeruginosa (strain LESB58) OX=557722 GN=hemA PE=3 SV=1 && PF01488:Shikimate / quinate 5-dehydrogenase|PF00745:Glutamyl-tRNAGlu reductase, dimerisation domain|PF05201:Glutamyl-tRNAGlu reductase, N-terminal domain	-	NOT_CHANGE
PA4665	1340.64	932.807	943.873	357.521	795.389	817.626	1072.44	656.845	0.707524	0.0378502	0.155835	prfA	NC_002516.2	5232485	5233567	-	1083	protein_coding	peptide chain release factor 1&&sp|P42806|RF1_PSEAE Peptide chain release factor 1 OS=Pseudomonas aeruginosa (strain ATCC 15692 / DSM 22644 / CIP 104116 / JCM 14847 / LMG 12228 / 1C / PRS 101 / PAO1) OX=208964 GN=prfA PE=3 SV=2 && PF00472:RF-1 domain|PF03462:PCRF domain	-	NOT_CHANGE
PA4664	923.658	809.606	766.896	186.821	494.972	487.633	833.387	389.809	1.0966	0.00219769	0.0231993	hemK	NC_002516.2	5231653	5232483	-	831	protein_coding	methyl transferase&&sp|Q9HVC8|PRMC_PSEAE Release factor glutamine methyltransferase OS=Pseudomonas aeruginosa (strain ATCC 15692 / DSM 22644 / CIP 104116 / JCM 14847 / LMG 12228 / 1C / PRS 101 / PAO1) OX=208964 GN=prmC PE=3 SV=1 && PF17827:PrmC N-terminal domain|PF05175:Methyltransferase small domain	-	UP
PA4663	644.688	689.339	570.256	253.204	428.213	418.271	634.761	366.563	0.792677	0.00176676	0.0201329	moeB	NC_002516.2	5230901	5231659	-	759	protein_coding	molybdopterin biosynthesis protein MoeB&&sp|P12282|MOEB_ECOLI Molybdopterin-synthase adenylyltransferase OS=Escherichia coli (strain K12) OX=83333 GN=moeB PE=1 SV=1 && PF00899:ThiF family	-	NOT_CHANGE
PA4662	404.162	486.937	501.95	150.785	318.537	256.428	464.35	241.916	0.940886	0.00149108	0.0177334	murI	NC_002516.2	5230114	5230911	-	798	protein_coding	glutamate racemase&&sp|B7V0K8|MURI_PSEA8 Glutamate racemase OS=Pseudomonas aeruginosa (strain LESB58) OX=557722 GN=murI PE=3 SV=1 && PF01177:Asp/Glu/Hydantoin racemase	Asp_Glu_race	NOT_CHANGE
PA4661	5003.72	7385.21	6709.57	4900.03	5160.49	5294.6	6366.17	5118.37	0.314748	0.116574	0.304399	pagL	NC_002516.2	5229459	5229980	-	522	protein_coding	lipid A 3-O-deacylase&&sp|Q9HVD1|PAGL_PSEAE Lipid A deacylase PagL OS=Pseudomonas aeruginosa (strain ATCC 15692 / DSM 22644 / CIP 104116 / JCM 14847 / LMG 12228 / 1C / PRS 101 / PAO1) OX=208964 GN=pagL PE=1 SV=1 && PF09411:Lipid A 3-O-deacylase (PagL)	-	NOT_CHANGE
PA4660	537.24	423.381	408.804	433.387	373.852	385.692	456.475	397.644	0.199086	0.308371	0.541488	phr	NC_002516.2	5227888	5229333	+	1446	protein_coding	deoxyribodipyrimidine photolyase&&sp|P25078|PHR_SALTY Deoxyribodipyrimidine photo-lyase OS=Salmonella typhimurium (strain LT2 / SGSC1412 / ATCC 700720) OX=99287 GN=phrB PE=1 SV=2 && PF00875:DNA photolyase|PF03441:FAD binding domain of DNA photolyase	-	NOT_CHANGE
PA4659	287.842	280.624	249.422	245.618	197.417	256.428	272.63	233.154	0.22661	0.253662	0.484635	PA4659	NC_002516.2	5226992	5227891	+	900	protein_coding	transcriptional regulator&&sp|P75989|BLUR_ECOLI HTH-type transcriptional repressor BluR OS=Escherichia coli (strain K12) OX=83333 GN=bluR PE=1 SV=1 && PF13411:MerR HTH family regulatory protein	-	NOT_CHANGE
PA4658	441.621	599.383	597.165	608.828	518.815	629.509	546.056	585.717	-0.101075	0.623188	0.79543	PA4658	NC_002516.2	5226026	5226982	+	957	protein_coding	hypothetical protein&&-- && PF04463:Protein of unknown function (DUF523)|PF08349:Protein of unknown function (DUF1722)	-	NOT_CHANGE
PA4657	1255.86	1881.26	1872.22	1867.26	1499.22	1731.94	1669.78	1699.47	-0.0254593	0.91028	0.956093	PA4657	NC_002516.2	5224890	5225873	+	984	protein_coding	hypothetical protein&&sp|Q48MT7|RNLS_PSE14 Renalase OS=Pseudomonas savastanoi pv. phaseolicola (strain 1448A / Race 6) OX=264730 GN=PSPPH_1014 PE=1 SV=1 && PF01593:Flavin containing amine oxidoreductase|PF13450:NAD(P)-binding Rossmann-like domain	Amino_oxidase	NOT_CHANGE
PA4656	400.219	435.115	378.791	404.937	412	446.646	404.708	421.195	-0.0570199	0.728486	0.864501	PA4656	NC_002516.2	5223559	5224476	-	918	protein_coding	hypothetical protein&&sp|P77775|YFCH_ECOLI Epimerase family protein YfcH OS=Escherichia coli (strain K12) OX=83333 GN=yfcH PE=3 SV=1 && PF08338:Domain of unknown function (DUF1731)|PF01370:NAD dependent epimerase/dehydratase family	Epimerase	NOT_CHANGE
PA4655	488.937	425.337	448.132	376.487	470.176	444.545	454.136	430.403	0.077627	0.666213	0.822498	hemH	NC_002516.2	5222540	5223562	-	1023	protein_coding	ferrochelatase&&sp|B7V0K1|HEMH_PSEA8 Ferrochelatase OS=Pseudomonas aeruginosa (strain LESB58) OX=557722 GN=hemH PE=3 SV=1 && PF00762:Ferrochelatase	-	NOT_CHANGE
PA4654	97.5903	98.7563	146.963	160.268	82.9722	176.557	114.436	139.932	-0.289913	0.397013	0.621442	PA4654	NC_002516.2	5220887	5222260	-	1374	protein_coding	major facilitator superfamily transporter&&-- && PF07690:Major Facilitator Superfamily	MFS_1	NOT_CHANGE
PA4653	42.3877	41.067	43.4678	54.0549	27.6574	62.005	42.3075	47.9058	-0.176432	0.623541	0.795476	PA4653	NC_002516.2	5219938	5220885	+	948	protein_coding	hypothetical protein&&-- && PF05229:Spore Coat Protein U domain	-	NOT_CHANGE
PA4652	39.4304	36.1781	21.7339	35.0882	42.9167	30.477	32.4475	36.1606	-0.155827	0.662971	0.820792	PA4652	NC_002516.2	5217569	5219941	+	2373	protein_coding	hypothetical protein&&-- && PF00577:Outer membrane usher protein|PF13953:PapC C-terminal domain	-	NOT_CHANGE
PA4651	18.7295	35.2003	41.3979	31.2949	29.5648	23.1205	31.7759	27.9934	0.178337	0.651949	0.814233	PA4651	NC_002516.2	5216764	5217552	+	789	protein_coding	pili assembly chaperone&&-- && PF00345:Pili and flagellar-assembly chaperone, PapD N-terminal domain	-	NOT_CHANGE
PA4650	4.92881	9.77785	7.24464	18.0183	13.3518	16.8149	7.3171	16.0617	-1.1327	0.0324374	1	PA4650	NC_002516.2	5216203	5216745	+	543	protein_coding	hypothetical protein&&-- && PF05229:Spore Coat Protein U domain	-	NOT_CHANGE
PA4649	1.97152	2.93336	5.17474	9.48331	3.81481	16.8149	3.35987	10.0377	-1.57726	0.0496014	1	PA4649	NC_002516.2	5215670	5216203	+	534	protein_coding	hypothetical protein&&-- && PF05229:Spore Coat Protein U domain	-	NOT_CHANGE
PA4648	24.644	29.3336	12.4194	38.8816	40.0555	38.8845	22.1323	39.2739	-0.822995	0.030727	0.136196	PA4648	NC_002516.2	5215091	5215639	+	549	protein_coding	hypothetical protein&&-- && PF05229:Spore Coat Protein U domain	-	NOT_CHANGE
PA4647	632.859	691.294	678.926	498.822	582.713	741.959	667.693	607.831	0.13607	0.512442	0.716261	uraA	NC_002516.2	5213474	5214757	+	1284	protein_coding	uracil permease&&sp|Q9CPL9|URAA_PASMU Probable uracil permease OS=Pasteurella multocida (strain Pm70) OX=272843 GN=uraA PE=3 SV=1 && PF00860:Permease family	-	NOT_CHANGE
PA4646	422.891	495.737	485.391	355.624	469.222	539.128	468.006	454.658	0.0422916	0.847087	0.925408	upp	NC_002516.2	5212833	5213471	+	639	protein_coding	uracil phosphoribosyltransferase&&sp|B7V0J2|UPP_PSEA8 Uracil phosphoribosyltransferase OS=Pseudomonas aeruginosa (strain LESB58) OX=557722 GN=upp PE=3 SV=1 && PF14681:Uracil phosphoribosyltransferase	-	NOT_CHANGE
PA4645	350.931	381.336	373.616	231.393	236.518	286.905	368.628	251.605	0.552065	0.00253707	0.02574	PA4645	NC_002516.2	5212107	5212664	-	558	protein_coding	hypoxanthine-guanine phosphoribosyltransferase&&sp|P37472|HGPRT_BACSU Hypoxanthine-guanine phosphoribosyltransferase OS=Bacillus subtilis (strain 168) OX=224308 GN=hprT PE=3 SV=1 && PF00156:Phosphoribosyl transferase domain	Pribosyltran	NOT_CHANGE
PA4644	104.491	124.179	127.299	84.4015	94.4166	101.94	118.656	93.5862	0.343305	0.12685	0.320479	PA4644	NC_002516.2	5211632	5212105	-	474	protein_coding	hypothetical protein&&-- && -	-	NOT_CHANGE
PA4643	313.472	318.758	361.197	303.466	262.268	255.377	331.142	273.704	0.274031	0.132295	0.328742	PA4643	NC_002516.2	5211079	5211564	-	486	protein_coding	hypothetical protein&&-- && -	-	NOT_CHANGE
PA4642	325.301	262.047	304.275	273.119	227.935	218.594	297.207	239.883	0.308376	0.12234	0.31427	PA4642	NC_002516.2	5210706	5210996	-	291	protein_coding	hypothetical protein&&-- && -	-	NOT_CHANGE
PA4641	153.779	154.49	169.731	238.979	170.713	191.27	159.333	200.321	-0.330949	0.128569	0.323023	PA4641	NC_002516.2	5210037	5210450	-	414	protein_coding	--&&-- && PF06983:3-demethylubiquinone-9 3-methyltransferase	-	NOT_CHANGE
PA4640	2184.45	2550.06	2386.59	2072.1	2718.05	2220.62	2373.7	2336.93	0.0224916	0.901353	0.951254	mqoB	NC_002516.2	5208464	5209987	+	1524	protein_coding	malate:quinone oxidoreductase&&sp|Q9HVF1|MQO2_PSEAE Probable malate:quinone oxidoreductase 2 OS=Pseudomonas aeruginosa (strain ATCC 15692 / DSM 22644 / CIP 104116 / JCM 14847 / LMG 12228 / 1C / PRS 101 / PAO1) OX=208964 GN=mqo2 PE=3 SV=1 && PF06039:Malate:quinone oxidoreductase (Mqo)	-	NOT_CHANGE
PA4639	907.886	817.429	943.873	735.905	768.685	806.065	889.729	770.218	0.208156	0.176421	0.391272	PA4639	NC_002516.2	5207035	5207622	-	588	protein_coding	hypothetical protein&&-- && PF03923:Uncharacterized lipoprotein	-	NOT_CHANGE
PA4637a	63.0887	51.8226	47.6076	20.8633	53.4074	33.6298	54.173	35.9668	0.590914	0.12295	0.314676	PA4637a	NC_002516.2	5206720	5207007	-	288	protein_coding	hypothetical protein&&-- && -	-	NOT_CHANGE
PA4637	127.163	155.468	187.326	230.444	258.454	148.182	156.652	212.36	-0.440616	0.121761	0.313388	PA4637	NC_002516.2	5206209	5206487	-	279	protein_coding	hypothetical protein&&-- && -	-	NOT_CHANGE
PA4636a	35.4874	45.9559	65.2017	104.316	89.6481	77.769	48.8817	90.5779	-0.893375	0.00354118	0.0331423	PA4636a	NC_002516.2	5204648	5204830	-	183	protein_coding	hypothetical protein&&-- && PF14255:Cysteine-rich CPXCG	-	NOT_CHANGE
PA4636	590.471	639.472	589.92	342.347	534.074	585.37	606.621	487.264	0.316609	0.19473	0.416467	PA4636	NC_002516.2	5204928	5206088	+	1161	protein_coding	hypothetical protein&&-- && PF01553:Acyltransferase	Acyltransferase	NOT_CHANGE
PA4635a	92.6615	110.49	93.1453	135.611	129.704	136.621	98.7655	133.979	-0.439171	0.0379211	0.156009	PA4635a	NC_002516.2	5204385	5204648	-	264	protein_coding	hypothetical protein&&-- && PF09413:Putative prokaryotic signal transducing protein	-	NOT_CHANGE
PA4635	33.5159	46.9337	49.6775	324.329	652.333	383.59	43.3757	453.418	-3.38685	1.57e-23	9.49e-21	PA4635	NC_002516.2	5203668	5204372	+	705	protein_coding	hypothetical protein&&sp|Q8Z2J2|MGTC_SALTI Protein MgtC OS=Salmonella typhi OX=90370 GN=mgtC PE=3 SV=1 && PF02308:MgtC family	-	DOWN
PA4634	305.586	283.558	314.624	373.642	268.944	383.59	301.256	342.059	-0.182895	0.38975	0.614677	PA4634	NC_002516.2	5202628	5203242	-	615	protein_coding	hypothetical protein&&sp|O34906|YOAM_BACSU Abasic site processing protein YoaM OS=Bacillus subtilis (strain 168) OX=224308 GN=yoaM PE=3 SV=1 && PF02586:SOS response associated peptidase (SRAP)	-	NOT_CHANGE
PA4633	4332.42	4905.55	4579.64	7692.86	5424.67	8020.72	4605.87	7046.08	-0.613316	0.00325605	0.0312231	PA4633	NC_002516.2	5200487	5202625	+	2139	protein_coding	chemotaxis transducer&&sp|Q88NI1|MCPU_PSEPK Methyl-accepting chemotaxis protein McpU OS=Pseudomonas putida (strain ATCC 47054 / DSM 6125 / NCIMB 11950 / KT2440) OX=160488 GN=mcpU PE=1 SV=1 && PF00015:Methyl-accepting chemotaxis protein (MCP) signalling domain|PF00672:HAMP domain|PF02743:Cache domain	Cache_1	NOT_CHANGE
PA4632	1446.11	1640.72	1673.51	1158.86	1627.02	1743.5	1586.78	1509.79	0.0718884	0.737493	0.868623	PA4632	NC_002516.2	5199503	5200324	-	822	protein_coding	hypothetical protein&&sp|P25894|LOIP_ECOLI Metalloprotease LoiP OS=Escherichia coli (strain K12) OX=83333 GN=loiP PE=1 SV=2 && PF01435:Peptidase family M48	Peptidase_M48	NOT_CHANGE
PA4631	803.395	761.695	796.91	678.057	924.139	932.177	787.333	844.791	-0.101406	0.601546	0.779962	PA4631	NC_002516.2	5198334	5199359	-	1026	protein_coding	hypothetical protein&&-- && PF01370:NAD dependent epimerase/dehydratase family	Epimerase	NOT_CHANGE
PA4630	139.978	212.179	149.033	324.329	306.139	279.548	167.063	303.339	-0.860339	0.000217506	0.00412807	PA4630	NC_002516.2	5197881	5198324	+	444	protein_coding	hypothetical protein&&-- && PF07366:SnoaL-like polyketide cyclase	-	NOT_CHANGE
PA4629	202.081	266.935	318.764	264.584	370.991	394.1	262.593	343.225	-0.386257	0.140335	0.341753	PA4629	NC_002516.2	5197186	5197764	+	579	protein_coding	hypothetical protein&&sp|A0A0H3AJF5|MNEA_VIBC3 Putative manganese exporter OS=Vibrio cholerae serotype O1 (strain ATCC 39541 / Classical Ogawa 395 / O395) OX=345073 GN=mneA PE=2 SV=1 && PF01169:Uncharacterized protein family UPF0016	-	NOT_CHANGE
PA4628	583.571	397.959	377.756	154.578	248.917	351.012	453.095	251.502	0.850288	0.0110783	0.0713282	lysP	NC_002516.2	5195370	5196833	+	1464	protein_coding	lysine-specific permease&&sp|P25737|LYSP_ECOLI Lysine-specific permease OS=Escherichia coli (strain K12) OX=83333 GN=lysP PE=1 SV=5 && PF00324:Amino acid permease	AA_permease	NOT_CHANGE
PA4627	215.882	124.179	154.207	63.5382	113.491	201.779	164.756	126.269	0.385689	0.354885	0.583951	PA4627	NC_002516.2	5194277	5195275	+	999	protein_coding	16S rRNA methyltransferase&&sp|Q9HVG4|RSMC_PSEAE Ribosomal RNA small subunit methyltransferase C OS=Pseudomonas aeruginosa (strain ATCC 15692 / DSM 22644 / CIP 104116 / JCM 14847 / LMG 12228 / 1C / PRS 101 / PAO1) OX=208964 GN=rsmC PE=3 SV=1 && PF08468:Methyltransferase small domain N-terminal|PF05175:Methyltransferase small domain	-	NOT_CHANGE
PA4626	320.372	296.269	282.541	290.189	250.824	292.159	299.727	277.724	0.110551	0.534563	0.730955	hprA	NC_002516.2	5193196	5194167	+	972	protein_coding	glycerate dehydrogenase&&sp|Q59516|DHGY_METEA Glycerate dehydrogenase OS=Methylorubrum extorquens (strain ATCC 14718 / DSM 1338 / JCM 2805 / NCIMB 9133 / AM1) OX=272630 GN=hprA PE=1 SV=3 && PF00389:D-isomer specific 2-hydroxyacid dehydrogenase, catalytic domain|PF02826:D-isomer specific 2-hydroxyacid dehydrogenase, NAD binding domain	2-Hacid_dh_C	NOT_CHANGE
PA4625	265.17	306.047	395.35	460.889	723.861	483.429	322.189	556.06	-0.787865	0.00317118	0.0307356	PA4625	NC_002516.2	5186411	5192875	-	6465	protein_coding	hypothetical protein&&-- && PF05860:haemagglutination activity domain|PF18676:MBG domain (YGX type)	-	NOT_CHANGE
PA4624	246.44	245.424	258.737	477.959	530.259	345.757	250.2	451.325	-0.851882	0.000129161	0.00276984	PA4624	NC_002516.2	5184642	5186348	-	1707	protein_coding	hypothetical protein&&-- && PF08479:POTRA domain, ShlB-type|PF03865:Haemolysin secretion/activation protein ShlB/FhaC/HecB	-	NOT_CHANGE
PA4623	28.5871	44.9781	22.7689	27.5016	20.0278	22.0696	32.1114	23.1997	0.470411	0.235353	0.465143	PA4623	NC_002516.2	5183950	5184339	-	390	protein_coding	hypothetical protein&&-- && -	-	NOT_CHANGE
PA4622	103.505	81.1562	94.1803	45.5199	46.7315	56.7504	92.9471	49.6672	0.90651	0.000469408	0.0073654	PA4622	NC_002516.2	5182579	5183790	+	1212	protein_coding	major facilitator superfamily transporter&&-- && PF05977:Transmembrane secretion effector	-	NOT_CHANGE
PA4621	2664.51	2800.38	2514.92	2345.22	2804.84	2647.3	2659.94	2599.12	0.0334259	0.828908	0.917695	PA4621	NC_002516.2	5179437	5182268	-	2832	protein_coding	oxidoreductase&&sp|Q0QLF1|NDMMS_EUBBA Nicotinate dehydrogenase medium molybdopterin subunit OS=Eubacterium barkeri OX=1528 GN=ndhM PE=1 SV=1 && PF02738:Molybdopterin-binding domain of aldehyde dehydrogenase	-	NOT_CHANGE
PA4620	491.895	453.692	440.888	433.387	485.435	427.73	462.158	448.851	0.0420229	0.797032	0.900525	PA4620	NC_002516.2	5178905	5179444	-	540	protein_coding	hypothetical protein&&sp|Q6AUV1|XDH_ORYSJ Xanthine dehydrogenase OS=Oryza sativa subsp. japonica OX=39947 GN=XDH PE=2 SV=1 && PF01799:[2Fe-2S] binding domain	-	NOT_CHANGE
PA4619	1216.43	1054.05	1050.47	1059.29	1150.17	989.979	1106.98	1066.48	0.0536663	0.740443	0.869597	PA4619	NC_002516.2	5177655	5178902	-	1248	protein_coding	cytochrome C&&sp|Q47945|ADHB_GLUOX Alcohol dehydrogenase (quinone), cytochrome c subunit OS=Gluconobacter oxydans (strain 621H) OX=290633 GN=adhB PE=1 SV=1 && PF00034:Cytochrome c|PF13442:Cytochrome C oxidase, cbb3-type, subunit III	-	NOT_CHANGE
PA4618	1001.53	1021.79	929.383	1189.21	934.629	857.561	984.234	993.799	-0.0141582	0.941299	0.970358	PA4618	NC_002516.2	5176680	5177651	-	972	protein_coding	hypothetical protein&&sp|Q46808|YQEB_ECOLI Uncharacterized protein YqeB OS=Escherichia coli (strain K12) OX=83333 GN=yqeB PE=4 SV=1 && PF02625:XdhC and CoxI family|PF13478:XdhC Rossmann domain	-	NOT_CHANGE
PA4617	872.399	915.207	828.993	638.227	832.583	885.936	872.2	785.582	0.15126	0.433178	0.653065	PA4617	NC_002516.2	5174980	5176104	+	1125	protein_coding	hypothetical protein&&sp|Q9HVH4|RLMG_PSEAE Ribosomal RNA large subunit methyltransferase G OS=Pseudomonas aeruginosa (strain ATCC 15692 / DSM 22644 / CIP 104116 / JCM 14847 / LMG 12228 / 1C / PRS 101 / PAO1) OX=208964 GN=rlmG PE=3 SV=1 && PF05175:Methyltransferase small domain	-	NOT_CHANGE
PA4616	473.165	322.669	260.807	133.715	198.37	305.821	352.214	212.635	0.729346	0.0403469	0.161833	PA4616	NC_002516.2	5173654	5174652	-	999	protein_coding	C4-dicarboxylate-binding protein&&sp|Q9HU18|DCTP_PSEAE C4-dicarboxylate-binding periplasmic protein DctP OS=Pseudomonas aeruginosa (strain ATCC 15692 / DSM 22644 / CIP 104116 / JCM 14847 / LMG 12228 / 1C / PRS 101 / PAO1) OX=208964 GN=dctP PE=1 SV=1 && PF03480:Bacterial extracellular solute-binding protein, family 7	-	NOT_CHANGE
PA4615	0.985761	2.93336	0	581.327	701.926	744.06	1.30637	675.771	-8.98794	9.49e-33	8.61e-30	fprB	NC_002516.2	5172771	5173547	-	777	protein_coding	oxidoreductase&&sp|Q44532|FENR_AZOVI Ferredoxin--NADP reductase OS=Azotobacter vinelandii OX=354 GN=fpr PE=1 SV=3 && PF00175:Oxidoreductase NAD-binding domain	NAD_binding_1	DOWN
PA4614	2298.79	2460.11	2302.76	3967.82	2811.52	3015.13	2353.89	3264.82	-0.471994	0.0151012	0.087271	mscL	NC_002516.2	5172253	5172666	+	414	protein_coding	large-conductance mechanosensitive channel&&sp|B7V0F9|MSCL_PSEA8 Large-conductance mechanosensitive channel OS=Pseudomonas aeruginosa (strain LESB58) OX=557722 GN=mscL PE=3 SV=1 && PF01741:Large-conductance mechanosensitive channel, MscL	-	NOT_CHANGE
PA4613	245.454	317.78	281.506	268.378	415.815	230.154	281.58	304.782	-0.114866	0.67729	0.830713	katB	NC_002516.2	5170185	5171726	-	1542	protein_coding	catalase&&sp|Q59635|CATB_PSEAE Catalase OS=Pseudomonas aeruginosa (strain ATCC 15692 / DSM 22644 / CIP 104116 / JCM 14847 / LMG 12228 / 1C / PRS 101 / PAO1) OX=208964 GN=katB PE=3 SV=1 && PF06628:Catalase-related immune-responsive|PF00199:Catalase	Catalase	NOT_CHANGE
PA4612	42.3877	60.6227	53.8173	57.8482	49.5926	62.005	52.2759	56.4819	-0.110282	0.697155	0.839987	PA4612	NC_002516.2	5169580	5170131	-	552	protein_coding	hypothetical protein&&-- && PF13857:Ankyrin repeats (many copies)	-	NOT_CHANGE
PA4611	3565.5	5472.67	5060.9	6612.71	6556.71	5052.88	4699.69	6074.1	-0.370148	0.11232	0.297675	PA4611	NC_002516.2	5169251	5169505	-	255	protein_coding	hypothetical protein&&-- && PF04325:Protein of unknown function (DUF465)	-	NOT_CHANGE
PA4610	677.218	704.983	855.902	759.613	606.555	833.39	746.034	733.186	0.0251808	0.902871	0.951982	PA4610	NC_002516.2	5168755	5169189	+	435	protein_coding	hypothetical protein&&-- && PF05425:Copper resistance protein D	-	NOT_CHANGE
PA4609	684.118	608.183	650.982	461.837	591.296	677.852	647.761	576.995	0.167377	0.415416	0.639021	radA	NC_002516.2	5167284	5168645	-	1362	protein_coding	DNA repair protein RadA&&sp|P96963|RADA_PSEAE DNA repair protein RadA OS=Pseudomonas aeruginosa (strain ATCC 15692 / DSM 22644 / CIP 104116 / JCM 14847 / LMG 12228 / 1C / PRS 101 / PAO1) OX=208964 GN=radA PE=3 SV=2 && PF18073:Rubredoxin metal binding domain|PF13541:Subunit ChlI of Mg-chelatase|PF13481:AAA domain	-	NOT_CHANGE
PA4608	573.713	723.561	730.673	955.918	673.315	821.829	675.982	817.021	-0.273466	0.201325	0.425159	PA4608	NC_002516.2	5166900	5167277	+	378	protein_coding	hypothetical protein&&sp|Q9HVI1|CDGBP_PSEAE Cyclic diguanosine monophosphate-binding protein PA4608 OS=Pseudomonas aeruginosa (strain ATCC 15692 / DSM 22644 / CIP 104116 / JCM 14847 / LMG 12228 / 1C / PRS 101 / PAO1) OX=208964 GN=PA4608 PE=1 SV=1 && PF07238:PilZ domain	-	NOT_CHANGE
PA4607	1217.41	1762.95	1335.08	2058.83	1455.35	1839.13	1438.48	1784.44	-0.310861	0.178568	0.394428	PA4607	NC_002516.2	5166191	5166697	-	507	protein_coding	hypothetical protein&&-- && PF11220:Protein of unknown function (DUF3015)	-	NOT_CHANGE
PA4606	4847.97	6199.16	5988.21	6151.82	4689.36	5950.38	5678.45	5597.19	0.0208054	0.915922	0.959059	PA4606	NC_002516.2	5163788	5165854	-	2067	protein_coding	hypothetical protein&&sp|P39396|BTST_ECOLI Pyruvate/proton symporter BtsT OS=Escherichia coli (strain K12) OX=83333 GN=btsT PE=1 SV=2 && PF02554:Carbon starvation protein CstA|PF13722:5TM C-terminal transporter carbon starvation CstA	-	NOT_CHANGE
PA4605	306.572	407.737	373.616	444.767	277.528	297.414	362.641	339.903	0.0929922	0.715655	0.854675	PA4605	NC_002516.2	5163536	5163739	-	204	protein_coding	hypothetical protein&&sp|P0ADD0|YJIX_ECO57 Uncharacterized protein YjiX OS=Escherichia coli O157:H7 OX=83334 GN=yjiX PE=4 SV=1 && PF04328:Selenoprotein, putative	-	NOT_CHANGE
PA4604	727.492	744.095	687.205	651.503	463.5	593.777	719.597	569.593	0.337421	0.0828089	0.247971	PA4604	NC_002516.2	5162472	5163476	-	1005	protein_coding	hypothetical protein&&sp|P24203|YJIA_ECOLI P-loop guanosine triphosphatase YjiA OS=Escherichia coli (strain K12) OX=83333 GN=yjiA PE=1 SV=3 && PF07683:Cobalamin synthesis protein cobW C-terminal domain|PF02492:CobW/HypB/UreG, nucleotide-binding domain	-	NOT_CHANGE
PA4603	142.935	153.512	141.788	120.438	103	109.297	146.079	110.912	0.397281	0.0514673	0.185534	PA4603	NC_002516.2	5162069	5162449	-	381	protein_coding	hypothetical protein&&-- && -	-	NOT_CHANGE
PA4602	1132.64	1204.63	1193.3	273.119	599.879	789.25	1176.86	554.083	1.08718	0.00218857	0.0231479	glyA3	NC_002516.2	5160738	5161991	+	1254	protein_coding	serine hydroxymethyltransferase&&sp|Q9HVI7|GLYA3_PSEAE Serine hydroxymethyltransferase 3 OS=Pseudomonas aeruginosa (strain ATCC 15692 / DSM 22644 / CIP 104116 / JCM 14847 / LMG 12228 / 1C / PRS 101 / PAO1) OX=208964 GN=glyA2 PE=3 SV=1 && PF00464:Serine hydroxymethyltransferase	SHMT	UP
PA4601	2086.86	1335.65	1431.33	833.583	1086.27	1197.01	1617.95	1038.95	0.639218	0.0115737	0.0734757	morA	NC_002516.2	5156368	5160615	+	4248	protein_coding	motility regulator&&sp|Q9I310|Y1727_PSEAE Uncharacterized signaling protein PA1727 OS=Pseudomonas aeruginosa (strain ATCC 15692 / DSM 22644 / CIP 104116 / JCM 14847 / LMG 12228 / 1C / PRS 101 / PAO1) OX=208964 GN=PA1727 PE=1 SV=1 && PF13426:PAS domain|PF08447:PAS fold|PF00990:Diguanylate cyclase, GGDEF domain|PF00563:EAL domain	EAL	NOT_CHANGE
PA4600	380.504	317.78	346.708	227.599	317.583	278.497	348.331	274.56	0.343443	0.0980768	0.277519	nfxB	NC_002516.2	5155561	5156124	+	564	protein_coding	transcriptional regulator NfxB&&sp|P32265|NFXB_PSEAE HTH-type transcriptional regulator NfxB OS=Pseudomonas aeruginosa (strain ATCC 15692 / DSM 22644 / CIP 104116 / JCM 14847 / LMG 12228 / 1C / PRS 101 / PAO1) OX=208964 GN=nfxB PE=4 SV=2 && -	-	NOT_CHANGE
PA4599	34.5016	48.8893	47.6076	40.7782	46.7315	47.292	43.6662	44.9339	-0.0409423	0.891036	0.947547	mexC	NC_002516.2	5154237	5155400	-	1164	protein_coding	resistance-nodulation-cell division (RND) multidrug efflux membrane fusion protein MexC&&sp|P0AE07|ACRA_ECO57 Multidrug efflux pump subunit AcrA OS=Escherichia coli O157:H7 OX=83334 GN=acrA PE=3 SV=1 && PF00529:HlyD membrane-fusion protein of T1SS|PF16576:Barrel-sandwich domain of CusB or HlyD membrane-fusion	HlyD	NOT_CHANGE
PA4598	145.893	203.379	159.382	163.113	217.444	143.978	169.551	174.845	-0.0450612	0.860048	0.931254	mexD	NC_002516.2	5151078	5154209	-	3132	protein_coding	resistance-nodulation-cell division (RND) multidrug efflux transporter MexD&&sp|P31224|ACRB_ECOLI Multidrug efflux pump subunit AcrB OS=Escherichia coli (strain K12) OX=83333 GN=acrB PE=1 SV=1 && PF00873:AcrB/AcrD/AcrF family	ACR_tran	NOT_CHANGE
PA4597	128.149	152.535	142.823	120.438	139.241	119.806	141.169	126.495	0.15777	0.449688	0.66699	oprJ	NC_002516.2	5149633	5151072	-	1440	protein_coding	multidrug efflux outer membrane protein OprJ&&sp|Q51397|OPRJ_PSEAE Outer membrane protein OprJ OS=Pseudomonas aeruginosa (strain ATCC 15692 / DSM 22644 / CIP 104116 / JCM 14847 / LMG 12228 / 1C / PRS 101 / PAO1) OX=208964 GN=oprJ PE=1 SV=2 && PF02321:Outer membrane efflux protein	OEP	NOT_CHANGE
PA4596	777.765	1366.94	1102.22	724.525	1741.46	889.089	1082.31	1118.36	-0.047345	0.897213	0.949692	PA4596	NC_002516.2	5149064	5149582	+	519	protein_coding	transcriptional regulator&&sp|P32265|NFXB_PSEAE HTH-type transcriptional regulator NfxB OS=Pseudomonas aeruginosa (strain ATCC 15692 / DSM 22644 / CIP 104116 / JCM 14847 / LMG 12228 / 1C / PRS 101 / PAO1) OX=208964 GN=nfxB PE=4 SV=2 && -	-	NOT_CHANGE
PA4595	7631.76	6437.74	6495.33	5059.35	5815.68	5724.43	6854.95	5533.15	0.309069	0.0548907	0.192276	PA4595	NC_002516.2	5146907	5148571	-	1665	protein_coding	ABC transporter ATP-binding protein&&sp|P45127|ETTA_HAEIN Energy-dependent translational throttle protein EttA OS=Haemophilus influenzae (strain ATCC 51907 / DSM 11121 / KW20 / Rd) OX=71421 GN=ettA PE=1 SV=1 && PF00005:ABC transporter|PF12848:ABC transporter	ABC_tran	NOT_CHANGE
PA4594	189.266	189.69	171.801	233.289	203.139	187.066	183.586	207.831	-0.179518	0.357434	0.586205	PA4594	NC_002516.2	5145717	5146403	-	687	protein_coding	ABC transporter ATP-binding protein&&sp|A0LM36|MACB_SYNFM Macrolide export ATP-binding/permease protein MacB OS=Syntrophobacter fumaroxidans (strain DSM 10017 / MPOB) OX=335543 GN=macB PE=3 SV=1 && PF00005:ABC transporter	ABC_tran	NOT_CHANGE
PA4593	103.505	105.601	158.347	112.851	122.074	119.806	122.484	118.244	0.0496527	0.844902	0.92469	PA4593	NC_002516.2	5144527	5145720	-	1194	protein_coding	ABC transporter permease&&sp|Q5P6D5|MACB_AROAE Macrolide export ATP-binding/permease protein MacB OS=Aromatoleum aromaticum (strain EbN1) OX=76114 GN=macB PE=3 SV=2 && PF02687:FtsX-like permease family|PF12704:MacB-like periplasmic core domain	-	NOT_CHANGE
PA4592	220.81	186.757	165.592	165.958	164.037	152.385	191.053	160.793	0.248792	0.2299	0.4589	PA4592	NC_002516.2	5143053	5144534	-	1482	protein_coding	hypothetical protein&&-- && PF02321:Outer membrane efflux protein	OEP	NOT_CHANGE
PA4591	164.622	181.868	167.662	170.7	150.685	173.404	171.384	164.93	0.0560692	0.770113	0.884588	PA4591	NC_002516.2	5141786	5143063	-	1278	protein_coding	hypothetical protein&&-- && PF16576:Barrel-sandwich domain of CusB or HlyD membrane-fusion	-	NOT_CHANGE
PA4590	217.853	275.736	328.079	529.169	300.417	418.271	273.889	415.952	-0.603144	0.0308178	0.136335	pra	NC_002516.2	5140701	5141189	-	489	protein_coding	protein activator&&-- && -	-	NOT_CHANGE
PA4589	134.064	179.913	154.207	168.803	181.204	153.436	156.061	167.814	-0.10531	0.62388	0.795476	PA4589	NC_002516.2	5139050	5140441	-	1392	protein_coding	hypothetical protein&&-- && PF03349:Outer membrane protein transport protein (OMPP1/FadL/TodX)	-	NOT_CHANGE
PA4588	850.712	518.226	554.732	946.434	729.583	879.631	641.223	851.883	-0.409715	0.10632	0.289371	gdhA	NC_002516.2	5137417	5138754	-	1338	protein_coding	glutamate dehydrogenase&&sp|P00370|DHE4_ECOLI NADP-specific glutamate dehydrogenase OS=Escherichia coli (strain K12) OX=83333 GN=gdhA PE=1 SV=1 && PF00208:Glutamate/Leucine/Phenylalanine/Valine dehydrogenase|PF02812:Glu/Leu/Phe/Val dehydrogenase, dimerisation domain	-	NOT_CHANGE
PA4587	17609.6	10892.5	10587.5	26222.3	13695.2	26292.2	13029.9	22069.9	-0.760247	0.0197326	0.103748	ccpR	NC_002516.2	5136317	5137357	+	1041	protein_coding	cytochrome C551 peroxidase&&sp|P14532|CCPR_PSEAE Cytochrome c551 peroxidase OS=Pseudomonas aeruginosa (strain ATCC 15692 / DSM 22644 / CIP 104116 / JCM 14847 / LMG 12228 / 1C / PRS 101 / PAO1) OX=208964 GN=ccpA PE=1 SV=2 && PF00034:Cytochrome c|PF03150:Di-haem cytochrome c peroxidase	CCP_MauG	NOT_CHANGE
PA4586	28.5871	15.6446	23.8038	27.5016	16.213	28.3752	22.6785	24.0299	-0.0816644	0.845534	0.924824	PA4586	NC_002516.2	5135816	5136193	+	378	protein_coding	hypothetical protein&&-- && -	-	NOT_CHANGE
PA4585	242.497	186.757	229.758	306.311	388.157	259.58	219.671	318.016	-0.534625	0.0228906	0.112939	rtcA	NC_002516.2	5134689	5135714	+	1026	protein_coding	RNA 3'-terminal-phosphate cyclase&&sp|Q02G92|RTCA_PSEAB RNA 3'-terminal phosphate cyclase OS=Pseudomonas aeruginosa (strain UCBPP-PA14) OX=208963 GN=rtcA PE=3 SV=1 && PF01137:RNA 3'-terminal phosphate cyclase|PF05189:RNA 3'-terminal phosphate cyclase (RTC), insert domain	-	NOT_CHANGE
PA4584	235.597	237.602	212.164	335.709	453.963	349.961	228.454	379.878	-0.733672	0.000359589	0.0059787	PA4584	NC_002516.2	5133880	5134692	+	813	protein_coding	hypothetical protein&&sp|P94389|YCGL_BACSU Uncharacterized protein YcgL OS=Bacillus subtilis (strain 168) OX=224308 GN=ycgL PE=4 SV=1 && PF10127:RNA repair pathway DNA polymerase beta family	-	NOT_CHANGE
PA4583	396.276	486.937	390.175	818.41	921.278	786.098	424.463	841.928	-0.987976	6.29e-08	4.08e-06	PA4583	NC_002516.2	5132629	5133843	+	1215	protein_coding	hypothetical protein&&sp|P46850|RTCB_ECOLI RNA-splicing ligase RtcB OS=Escherichia coli (strain K12) OX=83333 GN=rtcB PE=1 SV=3 && PF01139:tRNA-splicing ligase RtcB	-	NOT_CHANGE
PA4582	361.774	440.981	342.568	602.19	756.287	618.999	381.774	659.159	-0.787777	8e-05	0.00185354	PA4582	NC_002516.2	5131428	5132573	+	1146	protein_coding	hypothetical protein&&sp|Q27433|MEC2_CAEEL Mechanosensory protein 2 OS=Caenorhabditis elegans OX=6239 GN=mec-2 PE=1 SV=1 && PF01145:SPFH domain / Band 7 family	-	NOT_CHANGE
PA4581_1	252.355	329.514	322.904	515.892	453.963	401.456	301.591	457.104	-0.600504	0.00363498	0.0337304	PA4581_1	NC_002516.2	5131082	5131155	+	74	protein_coding	tRNA-Arg&&-- && -	-	NOT_CHANGE
PA4581	287.842	260.091	283.576	346.141	376.713	368.877	277.17	363.91	-0.392845	0.0177569	0.0971102	rtcR	NC_002516.2	5129173	5130768	-	1596	protein_coding	transcriptional regulator RtcR&&sp|P38035|RTCR_ECOLI Transcriptional regulatory protein RtcR OS=Escherichia coli (strain K12) OX=83333 GN=rtcR PE=4 SV=2 && PF00158:Sigma-54 interaction domain|PF06956:Regulator of RNA terminal phosphate cyclase	Sigma54_activat	NOT_CHANGE
PA4580	315.444	330.491	327.044	292.086	412.954	352.062	324.326	352.367	-0.119608	0.551307	0.742941	PA4580	NC_002516.2	5128563	5129117	-	555	protein_coding	hypothetical protein&&sp|Q5UR67|RIBX_MIMIV N-glycosidase R617 OS=Acanthamoeba polyphaga mimivirus OX=212035 GN=MIMI_R617 PE=3 SV=1 && PF08719:Domain of unknown function (DUF1768)	-	NOT_CHANGE
PA4579	3277.66	2285.08	2155.8	1539.14	2201.15	1828.62	2572.85	1856.3	0.470959	0.0548165	0.19214	PA4579	NC_002516.2	5126713	5128569	+	1857	protein_coding	hypothetical protein&&-- && PF13387:Domain of unknown function (DUF4105)	-	NOT_CHANGE
PA4578	16720.5	16356.4	16687.5	21407.6	15425.2	20233.6	16588.1	19022.1	-0.197524	0.285182	0.518141	PA4578	NC_002516.2	5126166	5126654	+	489	protein_coding	hypothetical protein&&-- && PF11220:Protein of unknown function (DUF3015)	-	NOT_CHANGE
PA4577	2251.48	2472.82	2419.71	3232.86	2967.93	2779.72	2381.34	2993.5	-0.330144	0.0256947	0.121031	PA4577	NC_002516.2	5125605	5125931	-	327	protein_coding	hypothetical protein&&-- && PF01258:Prokaryotic dksA/traR C4-type zinc finger	zf-dskA_traR	NOT_CHANGE
PA4576	5001.75	5111.86	4800.09	5155.13	5509.54	4991.93	4971.23	5218.87	-0.070148	0.600989	0.779612	PA4576	NC_002516.2	5123053	5125506	-	2454	protein_coding	ATP-dependent protease&&sp|P75867|LONH_ECOLI Putative Lon protease homolog OS=Escherichia coli (strain K12) OX=83333 GN=ycbZ PE=3 SV=1 && PF13654:AAA domain|PF05362:Lon protease (S16) C-terminal proteolytic domain	-	NOT_CHANGE
PA4575	76.8894	161.335	136.613	125.18	139.241	119.806	124.946	128.076	-0.0361619	0.906151	0.954148	PA4575	NC_002516.2	5122561	5122902	-	342	protein_coding	hypothetical protein&&-- && -	-	NOT_CHANGE
PA4574	125.192	184.801	200.78	103.368	182.157	158.691	170.258	148.072	0.201491	0.504158	0.710885	PA4574	NC_002516.2	5121899	5122387	-	489	protein_coding	hypothetical protein&&sp|Q9HVL0|Y4574_PSEAE UPF0114 protein PA4574 OS=Pseudomonas aeruginosa (strain ATCC 15692 / DSM 22644 / CIP 104116 / JCM 14847 / LMG 12228 / 1C / PRS 101 / PAO1) OX=208964 GN=PA4574 PE=3 SV=1 && PF03350:Uncharacterized protein family, UPF0114	-	NOT_CHANGE
PA4573	70.9748	54.756	78.656	69.2282	55.3148	58.8522	68.1289	61.1317	0.154509	0.571784	0.756926	PA4573	NC_002516.2	5121337	5121642	-	306	protein_coding	hypothetical protein&&-- && -	-	NOT_CHANGE
PA4572	826.068	1093.16	1162.25	348.986	495.926	609.541	1027.16	484.818	1.0836	4.47e-05	0.00110756	fklB	NC_002516.2	5120635	5121252	-	618	protein_coding	peptidyl-prolyl cis-trans isomerase FklB&&sp|P0A9L3|FKBB_ECOLI FKBP-type 22 kDa peptidyl-prolyl cis-trans isomerase OS=Escherichia coli (strain K12) OX=83333 GN=fklB PE=1 SV=2 && PF01346:Domain amino terminal to FKBP-type peptidyl-prolyl isomerase|PF00254:FKBP-type peptidyl-prolyl cis-trans isomerase	FKBP_C	UP
PA4571	23531.1	20797.5	19799.6	27179.2	24557.9	33061.3	21376.1	28266.1	-0.403063	0.0307296	0.136196	PA4571	NC_002516.2	5118538	5120565	+	2028	protein_coding	cytochrome C&&sp|P0A388|ADHB_GLUPO Alcohol dehydrogenase (quinone), cytochrome c subunit OS=Gluconacetobacter polyoxogenes OX=439 GN=adhB PE=1 SV=1 && PF13442:Cytochrome C oxidase, cbb3-type, subunit III	-	NOT_CHANGE
PA4570	14.7864	11.7334	26.9086	11.38	14.3056	16.8149	17.8095	14.1668	0.329209	0.500391	0.707038	PA4570	NC_002516.2	5117971	5118195	+	225	protein_coding	hypothetical protein&&-- && -	-	NOT_CHANGE
PA4569	1005.48	963.119	999.76	690.385	932.722	979.469	989.452	867.525	0.189981	0.333671	0.564666	ispB	NC_002516.2	5116865	5117833	+	969	protein_coding	octaprenyl-diphosphate synthase&&sp|P0AD57|ISPB_ECOLI Octaprenyl diphosphate synthase OS=Escherichia coli (strain K12) OX=83333 GN=ispB PE=1 SV=1 && PF00348:Polyprenyl synthetase	-	NOT_CHANGE
PA4568	6830.34	8605.49	8812.58	2151.76	4584.45	5496.38	8082.8	4077.53	0.987208	0.00363307	0.0337304	rplU	NC_002516.2	5116313	5116624	-	312	protein_coding	50S ribosomal protein L21&&sp|B7V0B1|RL21_PSEA8 50S ribosomal protein L21 OS=Pseudomonas aeruginosa (strain LESB58) OX=557722 GN=rplU PE=3 SV=1 && PF00829:Ribosomal prokaryotic L21 protein	-	NOT_CHANGE
PA4567	3333.84	5007.24	4780.42	1300.16	2882.09	2899.52	4373.84	2360.59	0.889806	0.00843151	0.0592599	rpmA	NC_002516.2	5116032	5116289	-	258	protein_coding	50S ribosomal protein L27&&sp|A6VBV4|RL27_PSEA7 50S ribosomal protein L27 OS=Pseudomonas aeruginosa (strain PA7) OX=381754 GN=rpmA PE=3 SV=1 && PF01016:Ribosomal L27 protein	-	NOT_CHANGE
PA4566	3184.99	3101.54	2963.06	2690.41	3321.75	3498.56	3083.2	3170.24	-0.0400733	0.814993	0.910055	obg	NC_002516.2	5114670	5115890	-	1221	protein_coding	GTPase ObgE&&sp|B7V0A9|OBG_PSEA8 GTPase Obg OS=Pseudomonas aeruginosa (strain LESB58) OX=557722 GN=obg PE=3 SV=1 && PF01018:GTP1/OBG|PF01926:50S ribosome-binding GTPase	-	NOT_CHANGE
PA4565	2536.36	2556.91	2342.09	1859.68	3129.1	2898.47	2478.45	2629.08	-0.0850544	0.720516	0.858785	proB	NC_002516.2	5113481	5114599	-	1119	protein_coding	gamma-glutamyl kinase&&sp|B7V0A8|PROB_PSEA8 Glutamate 5-kinase OS=Pseudomonas aeruginosa (strain LESB58) OX=557722 GN=proB PE=3 SV=1 && PF00696:Amino acid kinase family|PF01472:PUA domain	AA_kinase	NOT_CHANGE
PA4564	779.737	863.385	715.149	629.692	1073.87	871.223	786.09	858.262	-0.12661	0.602015	0.780198	PA4564	NC_002516.2	5113005	5113469	-	465	protein_coding	hypothetical protein&&sp|P0AE93|CREA_ECO57 Protein CreA OS=Escherichia coli O157:H7 OX=83334 GN=creA PE=3 SV=1 && PF05981:CreA protein	-	NOT_CHANGE
PA4563	1244.03	945.519	1278.16	353.727	781.083	837.593	1155.9	657.468	0.814254	0.015321	0.0880313	rpsT	NC_002516.2	5112663	5112938	+	276	protein_coding	30S ribosomal protein S20&&sp|B7V0A6|RS20_PSEA8 30S ribosomal protein S20 OS=Pseudomonas aeruginosa (strain LESB58) OX=557722 GN=rpsT PE=3 SV=1 && PF01649:Ribosomal protein S20	-	NOT_CHANGE
PA4562	247.426	190.668	220.444	162.165	257.5	242.765	219.513	220.81	-0.00803251	0.974533	0.988192	PA4562	NC_002516.2	5110841	5112379	-	1539	protein_coding	hypothetical protein&&sp|P37169|MURJ_SALTY Probable lipid II flippase MurJ OS=Salmonella typhimurium (strain LT2 / SGSC1412 / ATCC 700720) OX=99287 GN=murJ PE=1 SV=1 && PF03023:Lipid II flippase MurJ	-	NOT_CHANGE
PA4561	965.06	812.54	932.488	596.5	784.898	838.644	903.363	740.014	0.288015	0.155602	0.365487	ribF	NC_002516.2	5109806	5110744	-	939	protein_coding	bifunctional riboflavin kinase/FMN adenylyltransferase&&sp|P22990|RIBF_PSEFL Bifunctional riboflavin kinase/FMN adenylyltransferase OS=Pseudomonas fluorescens OX=294 GN=ribF PE=3 SV=1 && PF06574:FAD synthetase|PF01687:Riboflavin kinase	-	NOT_CHANGE
PA4560	8254.76	7921.04	7636.88	3382.7	6447.99	5950.38	7937.56	5260.36	0.593563	0.0266656	0.124249	ileS	NC_002516.2	5106951	5109782	-	2832	protein_coding	isoleucine--tRNA ligase&&sp|Q9HVM4|SYI_PSEAE Isoleucine--tRNA ligase OS=Pseudomonas aeruginosa (strain ATCC 15692 / DSM 22644 / CIP 104116 / JCM 14847 / LMG 12228 / 1C / PRS 101 / PAO1) OX=208964 GN=ileS PE=3 SV=1 && PF08264:Anticodon-binding domain of tRNA|PF00133:tRNA synthetases class I (I, L, M and V)|PF06827:Zinc finger found in FPG and IleRS	-	NOT_CHANGE
PA4559	1033.08	1202.68	1103.25	401.144	885.991	798.709	1113	695.281	0.678966	0.0265108	0.123634	lspA	NC_002516.2	5106449	5106958	-	510	protein_coding	lipoprotein signal peptidase&&sp|Q9HVM5|LSPA_PSEAE Lipoprotein signal peptidase OS=Pseudomonas aeruginosa (strain ATCC 15692 / DSM 22644 / CIP 104116 / JCM 14847 / LMG 12228 / 1C / PRS 101 / PAO1) OX=208964 GN=lspA PE=1 SV=1 && PF01252:Signal peptidase (SPase) II	-	NOT_CHANGE
PA4558	1252.9	1537.08	1426.16	498.822	1035.72	859.663	1405.38	798.069	0.816469	0.00465609	0.0403849	PA4558	NC_002516.2	5106016	5106456	-	441	protein_coding	FkbP-type peptidyl-prolyl cis-trans isomerase&&sp|P21863|FKBX_PSEFL Probable FKBP-type 16 kDa peptidyl-prolyl cis-trans isomerase OS=Pseudomonas fluorescens OX=294 GN=yaaD PE=3 SV=1 && PF00254:FKBP-type peptidyl-prolyl cis-trans isomerase	FKBP_C	NOT_CHANGE
PA4557	1450.05	1862.68	1774.94	664.78	1062.43	944.789	1695.89	890.665	0.929175	8.48e-05	0.00194843	lytB	NC_002516.2	5104986	5105930	-	945	protein_coding	4-hydroxy-3-methylbut-2-enyl diphosphate reductase&&sp|Q9HVM7|ISPH_PSEAE 4-hydroxy-3-methylbut-2-enyl diphosphate reductase OS=Pseudomonas aeruginosa (strain ATCC 15692 / DSM 22644 / CIP 104116 / JCM 14847 / LMG 12228 / 1C / PRS 101 / PAO1) OX=208964 GN=ispH PE=3 SV=1 && PF02401:LytB protein	-	NOT_CHANGE
PA4556	761.993	737.25	701.695	775.735	589.389	670.495	733.646	678.54	0.112654	0.528085	0.725651	pilE	NC_002516.2	5104514	5104939	+	426	protein_coding	type 4 fimbrial biogenesis protein PilE&&sp|G3XD43|PILE_PSEAE Type IV pilus non-core minor pilin PilE OS=Pseudomonas aeruginosa (strain ATCC 15692 / DSM 22644 / CIP 104116 / JCM 14847 / LMG 12228 / 1C / PRS 101 / PAO1) OX=208964 GN=pilE PE=1 SV=1 && PF07963:Prokaryotic N-terminal methylation motif|PF16732:Type IV minor pilin ComP, DNA uptake sequence receptor	-	NOT_CHANGE
PA4555	569.77	569.071	495.74	456.147	420.583	525.466	544.86	467.399	0.221952	0.216163	0.443206	pilY2	NC_002516.2	5104170	5104517	+	348	protein_coding	type 4 fimbrial biogenesis protein PilY2&&-- && PF14481:Type 4 fimbrial biogenesis protein PilY2	-	NOT_CHANGE
PA4554	4272.29	3685.27	3225.93	2474.2	2959.34	3789.66	3727.83	3074.4	0.278153	0.221058	0.448289	pilY1	NC_002516.2	5100683	5104168	+	3486	protein_coding	type 4 fimbrial biogenesis protein PilY1&&sp|Q9HVM8|PILY1_PSEAE Type IV pilus biogenesis factor PilY1 OS=Pseudomonas aeruginosa (strain ATCC 15692 / DSM 22644 / CIP 104116 / JCM 14847 / LMG 12228 / 1C / PRS 101 / PAO1) OX=208964 GN=pilY1 PE=3 SV=1 && PF05567:Neisseria PilC beta-propeller domain	-	NOT_CHANGE
PA4553	420.92	324.625	272.191	275.016	280.389	428.781	339.245	328.062	0.0494339	0.857076	0.930189	pilX	NC_002516.2	5100084	5100671	+	588	protein_coding	type 4 fimbrial biogenesis protein PilX&&-- && PF14341:PilX N-terminal	-	NOT_CHANGE
PA4552	626.944	493.782	466.762	531.065	415.815	711.481	529.162	552.787	-0.06241	0.80977	0.906942	pilW	NC_002516.2	5099263	5100087	+	825	protein_coding	type 4 fimbrial biogenesis protein PilW&&-- && PF07963:Prokaryotic N-terminal methylation motif	-	NOT_CHANGE
PA4551	415.991	289.425	248.388	307.259	283.25	476.073	317.934	355.527	-0.16029	0.592434	0.772931	pilV	NC_002516.2	5098709	5099266	+	558	protein_coding	type 4 fimbrial biogenesis protein PilV&&-- && PF07963:Prokaryotic N-terminal methylation motif	-	NOT_CHANGE
PA4550	491.895	372.536	402.595	422.956	342.38	523.365	422.342	429.567	-0.0238293	0.91903	0.960652	fimU	NC_002516.2	5098212	5098718	+	507	protein_coding	type 4 fimbrial biogenesis protein FimU&&-- && PF07963:Prokaryotic N-terminal methylation motif|PF12019:Type II transport protein GspH	-	NOT_CHANGE
PA4549	12.8149	9.77785	17.5941	23.7083	17.1667	21.0187	13.3956	20.6312	-0.626931	0.157835	0.36914	fimT	NC_002516.2	5097597	5098106	+	510	protein_coding	type 4 fimbrial biogenesis protein FimT&&-- && PF12019:Type II transport protein GspH	-	NOT_CHANGE
PA4548	500.767	423.381	434.678	342.347	350.009	483.429	452.942	391.929	0.209632	0.331156	0.564042	PA4548	NC_002516.2	5096368	5097462	-	1095	protein_coding	D-amino acid oxidase&&sp|P33642|GLYOX_PSEAE Glycine oxidase OS=Pseudomonas aeruginosa (strain ATCC 15692 / DSM 22644 / CIP 104116 / JCM 14847 / LMG 12228 / 1C / PRS 101 / PAO1) OX=208964 GN=thiO PE=3 SV=3 && PF01266:FAD dependent oxidoreductase	DAO	NOT_CHANGE
PA4547	980.832	941.607	894.195	550.032	677.129	620.05	938.878	615.737	0.608735	0.000224423	0.00421345	pilR	NC_002516.2	5094985	5096322	+	1338	protein_coding	two-component response regulator PilR&&sp|Q00934|PILR_PSEAE Response regulator protein PilR OS=Pseudomonas aeruginosa (strain ATCC 15692 / DSM 22644 / CIP 104116 / JCM 14847 / LMG 12228 / 1C / PRS 101 / PAO1) OX=208964 GN=pilR PE=1 SV=2 && PF00158:Sigma-54 interaction domain|PF00072:Response regulator receiver domain|PF02954:Bacterial regulatory protein, Fis family	Sigma54_activat	NOT_CHANGE
PA4546	616.101	540.715	576.466	528.22	518.815	514.957	577.761	520.664	0.150037	0.327207	0.559601	pilS	NC_002516.2	5093378	5094970	+	1593	protein_coding	two-component sensor PilS&&sp|P33639|PILS_PSEAE Sensor protein kinase PilS OS=Pseudomonas aeruginosa (strain ATCC 15692 / DSM 22644 / CIP 104116 / JCM 14847 / LMG 12228 / 1C / PRS 101 / PAO1) OX=208964 GN=pilS PE=1 SV=1 && PF00512:His Kinase A (phospho-acceptor) domain|PF02518:Histidine kinase-, DNA gyrase B-, and HSP90-like ATPase	HATPase_c	NOT_CHANGE
PA4545	1857.17	1721.88	1667.3	1081.1	1653.72	1745.6	1748.79	1493.47	0.227848	0.322799	0.55484	comL	NC_002516.2	5091961	5092986	+	1026	protein_coding	competence protein ComL&&sp|P33641|BAMD_PSEAE Outer membrane protein assembly factor BamD OS=Pseudomonas aeruginosa (strain ATCC 15692 / DSM 22644 / CIP 104116 / JCM 14847 / LMG 12228 / 1C / PRS 101 / PAO1) OX=208964 GN=bamD PE=3 SV=2 && PF13525:Outer membrane lipoprotein	-	NOT_CHANGE
PA4544	1305.15	1025.7	1070.14	786.166	1053.84	1123.45	1133.66	987.819	0.198905	0.355923	0.584653	rluD	NC_002516.2	5090853	5091815	-	963	protein_coding	pseudouridine synthase&&sp|P33640|RLUD_PSEAE Ribosomal large subunit pseudouridine synthase D OS=Pseudomonas aeruginosa (strain ATCC 15692 / DSM 22644 / CIP 104116 / JCM 14847 / LMG 12228 / 1C / PRS 101 / PAO1) OX=208964 GN=rluD PE=3 SV=2 && PF00849:RNA pseudouridylate synthase|PF01479:S4 domain	S4	NOT_CHANGE
PA4543	384.447	338.314	381.896	195.356	290.88	321.585	368.219	269.274	0.452272	0.0601106	0.204256	PA4543	NC_002516.2	5090128	5090856	-	729	protein_coding	hypothetical protein&&sp|P33663|PURNU_PSEAE Purine nucleoside phosphorylase PA4543 OS=Pseudomonas aeruginosa (strain ATCC 15692 / DSM 22644 / CIP 104116 / JCM 14847 / LMG 12228 / 1C / PRS 101 / PAO1) OX=208964 GN=PA4543 PE=3 SV=2 && PF02578:Multi-copper polyphenol oxidoreductase laccase	-	NOT_CHANGE
PA4542	18844.8	31557	27996.4	45647.9	33464.5	27210.8	26132.7	35441.1	-0.43957	0.119414	0.309589	clpB	NC_002516.2	5087408	5089972	-	2565	protein_coding	chaperone protein ClpB&&sp|Q9HVN5|CLPB_PSEAE Chaperone protein ClpB OS=Pseudomonas aeruginosa (strain ATCC 15692 / DSM 22644 / CIP 104116 / JCM 14847 / LMG 12228 / 1C / PRS 101 / PAO1) OX=208964 GN=clpB PE=3 SV=1 && PF10431:C-terminal, D2-small domain, of ClpB protein|PF07724:AAA domain (Cdc48 subfamily)|PF00004:ATPase family associated with various cellular activities (AAA)|PF17871:AAA lid domai…	Clp_N	NOT_CHANGE
PA4541_3	5.91457	4.88893	3.10484	4.74165	7.62963	3.1528	4.63611	5.17469	-0.162938	0.831494	1	PA4541_3	NC_002516.2	5087097	5087172	-	76	protein_coding	tRNA-Asn&&-- && -	-	NOT_CHANGE
PA4541_2	12.8149	9.77785	14.4893	6.63832	11.4444	12.6112	12.3607	10.2313	0.276251	0.598179	1	PA4541_2	NC_002516.2	5087011	5087087	-	77	protein_coding	tRNA-Pro&&-- && -	-	NOT_CHANGE
PA4541	266.155	308.98	285.646	286.396	315.676	324.738	286.927	308.937	-0.106185	0.544298	0.739198	PA4541	NC_002516.2	5082443	5086696	+	4254	protein_coding	hypothetical protein&&sp|P45355|HXUA3_HAEIF Heme/hemopexin-binding protein OS=Haemophilus influenzae OX=727 GN=hxuA PE=3 SV=1 && PF05860:haemagglutination activity domain|PF13018:Extended Signal Peptide of Type V secretion system	-	NOT_CHANGE
PA4540	5.91457	11.7334	11.3844	16.1216	11.4444	14.7131	9.67747	14.093	-0.543245	0.293999	1	PA4540	NC_002516.2	5080757	5082394	+	1638	protein_coding	hypothetical protein&&sp|Q4QNS5|HXUB_HAEI8 Heme/hemopexin transporter protein HuxB OS=Haemophilus influenzae (strain 86-028NP) OX=281310 GN=hxuB PE=3 SV=1 && PF03865:Haemolysin secretion/activation protein ShlB/FhaC/HecB|PF08479:POTRA domain, ShlB-type	-	NOT_CHANGE
PA4539	392.333	407.737	439.853	357.521	415.815	342.604	413.307	371.98	0.151388	0.388183	0.613522	PA4539	NC_002516.2	5079117	5080208	-	1092	protein_coding	hypothetical protein&&sp|P64613|ZAPE_ECO57 Cell division protein ZapE OS=Escherichia coli O157:H7 OX=83334 GN=zapE PE=3 SV=1 && PF03969:AFG1-like ATPase	AFG1_ATPase	NOT_CHANGE
PA4538	2606.35	2227.4	2269.64	1610.27	1969.4	1777.13	2367.8	1785.6	0.407155	0.0152688	0.0878237	ndh	NC_002516.2	5077770	5079077	+	1308	protein_coding	NADH dehydrogenase&&sp|P00393|NDH_ECOLI Type II NADH:quinone oxidoreductase OS=Escherichia coli (strain K12) OX=83333 GN=ndh PE=1 SV=2 && PF07992:Pyridine nucleotide-disulphide oxidoreductase	Pyr_redox_2	NOT_CHANGE
PA4537	78.8609	92.8896	93.1453	80.6081	120.167	59.9032	88.2986	86.8926	0.0206047	0.946891	0.972787	PA4537	NC_002516.2	5077536	5077706	+	171	protein_coding	hypothetical protein&&-- && PF11293:Protein of unknown function (DUF3094)	-	NOT_CHANGE
PA4536	360.789	407.737	373.616	405.886	344.287	335.248	380.714	361.807	0.0731192	0.681415	0.832213	PA4536	NC_002516.2	5077061	5077510	+	450	protein_coding	hypothetical protein&&-- && PF03473:MOSC domain	MOSC	NOT_CHANGE
PA4535	583.571	656.094	676.856	763.406	680.944	579.064	638.84	674.472	-0.0787992	0.671345	0.82591	PA4535	NC_002516.2	5076435	5077064	+	630	protein_coding	hypothetical protein&&-- && PF08682:Putative endonuclease, protein of unknown function (DUF1780)	-	NOT_CHANGE
PA4534	276.999	265.958	268.052	306.311	283.25	348.91	270.336	312.823	-0.20981	0.240143	0.470355	PA4534	NC_002516.2	5075877	5076302	-	426	protein_coding	hypothetical protein&&-- && PF00583:Acetyltransferase (GNAT) family	Acetyltransf_1	NOT_CHANGE
PA4533	222.782	188.713	196.64	215.271	165.944	239.613	202.712	206.943	-0.0287558	0.89703	0.949684	PA4533	NC_002516.2	5075410	5075880	-	471	protein_coding	hypothetical protein&&-- && -	-	NOT_CHANGE
PA4532	249.398	210.224	205.955	216.219	213.63	181.811	221.859	203.887	0.121215	0.540083	0.735837	PA4532	NC_002516.2	5074724	5075413	-	690	protein_coding	hypothetical protein&&-- && PF01891:Cobalt uptake substrate-specific transmembrane region	-	NOT_CHANGE
PA4531	687.075	711.828	779.316	800.391	584.62	834.441	726.073	739.817	-0.0268791	0.895541	0.949214	PA4531	NC_002516.2	5074409	5074618	-	210	protein_coding	hypothetical protein&&-- && -	-	NOT_CHANGE
PA4530	441.621	373.514	389.14	360.366	305.185	368.877	401.425	344.809	0.219754	0.229066	0.45804	PA4530	NC_002516.2	5074172	5074372	+	201	protein_coding	zinc-binding protein&&sp|A6VBR6|YACG_PSEA7 DNA gyrase inhibitor YacG OS=Pseudomonas aeruginosa (strain PA7) OX=381754 GN=yacG PE=3 SV=1 && PF03884:DNA gyrase inhibitor YacG	-	NOT_CHANGE
PA4529	1264.73	939.652	1028.74	703.662	877.407	925.872	1077.71	835.647	0.367226	0.0769359	0.23678	coaE	NC_002516.2	5073564	5074175	+	612	protein_coding	dephospho-CoA kinase&&sp|Q9HVP8|COAE_PSEAE Dephospho-CoA kinase OS=Pseudomonas aeruginosa (strain ATCC 15692 / DSM 22644 / CIP 104116 / JCM 14847 / LMG 12228 / 1C / PRS 101 / PAO1) OX=208964 GN=coaE PE=3 SV=1 && PF01121:Dephospho-CoA kinase	-	NOT_CHANGE
PA4528	2267.25	1666.15	1738.71	1177.83	1310.39	1492.32	1890.7	1326.85	0.511099	0.0123332	0.0768635	pilD	NC_002516.2	5072695	5073567	+	873	protein_coding	type 4 prepilin peptidase PilD&&sp|P22610|LEP4_PSEAE Prepilin leader peptidase/N-methyltransferase OS=Pseudomonas aeruginosa (strain ATCC 15692 / DSM 22644 / CIP 104116 / JCM 14847 / LMG 12228 / 1C / PRS 101 / PAO1) OX=208964 GN=pilD PE=1 SV=3 && PF01478:Type IV leader peptidase family|PF06750:Bacterial Peptidase A24 N-terminal domain	-	NOT_CHANGE
PA4527	10180.9	10147.5	8996.8	8189.79	9417.82	8651.28	9775.07	8752.96	0.159345	0.287071	0.519538	pilC	NC_002516.2	5071567	5072691	+	1125	protein_coding	--&&sp|P22609|PILC_PSEAE Type IV pilus assembly protein PilC OS=Pseudomonas aeruginosa (strain ATCC 15692 / DSM 22644 / CIP 104116 / JCM 14847 / LMG 12228 / 1C / PRS 101 / PAO1) OX=208964 GN=pilC PE=1 SV=2 && PF00482:Type II secretion system (T2SS), protein F	-	NOT_CHANGE
PA4526	7753.01	5279.06	5091.94	6975.92	6117.05	5831.63	6041.34	6308.2	-0.0623623	0.782685	0.890038	pilB	NC_002516.2	5069763	5071463	+	1701	protein_coding	type 4 fimbrial biogenesis protein PilB&&sp|P22608|PILB_PSEAE Type IV pilus assembly ATPase PilB OS=Pseudomonas aeruginosa (strain ATCC 15692 / DSM 22644 / CIP 104116 / JCM 14847 / LMG 12228 / 1C / PRS 101 / PAO1) OX=208964 GN=pilB PE=1 SV=2 && PF05157:Type II secretion system (T2SS), protein E, N-terminal domain|PF00437:Type II/IV secretion system protein	-	NOT_CHANGE
PA4525	54269.1	39355.9	39486.4	50240.7	37804.8	47705	44370.4	45250.2	-0.0283212	0.896634	0.949684	pilA	NC_002516.2	5069082	5069531	-	450	protein_coding	type 4 fimbrial protein PilA&&sp|P04739|PILA_PSEAE Type IV major pilin protein PilA OS=Pseudomonas aeruginosa (strain ATCC 15692 / DSM 22644 / CIP 104116 / JCM 14847 / LMG 12228 / 1C / PRS 101 / PAO1) OX=208964 GN=pilA PE=1 SV=1 && PF07963:Prokaryotic N-terminal methylation motif|PF00114:Pilin (bacterial filament)	-	NOT_CHANGE
PA4524_1	90.69	69.4228	81.7609	131.818	146.87	71.4634	80.6246	116.717	-0.536033	0.0956602	0.272699	PA4524_1	NC_002516.2	5068932	5069007	-	76	protein_coding	tRNA-Thr&&-- && -	-	NOT_CHANGE
PA4524	519.496	483.026	520.579	422.007	340.472	441.392	507.7	401.29	0.339729	0.0629103	0.209714	nadC	NC_002516.2	5068032	5068880	+	849	protein_coding	nicotinate-nucleotide pyrophosphorylase&&sp|P30819|NADC_PSEAE Nicotinate-nucleotide pyrophosphorylase [carboxylating] OS=Pseudomonas aeruginosa (strain ATCC 15692 / DSM 22644 / CIP 104116 / JCM 14847 / LMG 12228 / 1C / PRS 101 / PAO1) OX=208964 GN=nadC PE=3 SV=2 && PF01729:Quinolinate phosphoribosyl transferase, C-terminal domain|PF02749:Quinolinate phosphoribosyl transferase, N-terminal domain	-	NOT_CHANGE
PA4523	5345.78	6589.3	6147.59	5209.18	4848.63	5657.17	6027.56	5238.33	0.202502	0.219848	0.446999	PA4523	NC_002516.2	5065491	5067746	-	2256	protein_coding	hypothetical protein&&-- && PF07793:Protein of unknown function (DUF1631)	-	NOT_CHANGE
PA4522	291.785	295.291	313.589	361.314	382.435	335.248	300.222	359.666	-0.261258	0.116546	0.304399	ampD	NC_002516.2	5064774	5065340	-	567	protein_coding	N-acetyl-anhydromuranmyl-L-alanine amidase&&sp|E1W818|AMPD_SALTS 1,6-anhydro-N-acetylmuramyl-L-alanine amidase AmpD OS=Salmonella typhimurium (strain SL1344) OX=216597 GN=ampD PE=3 SV=1 && PF01510:N-acetylmuramoyl-L-alanine amidase	-	NOT_CHANGE
PA4521	407.119	366.67	391.21	411.576	360.5	383.59	388.333	385.222	0.0115034	0.944382	0.971402	PA4521	NC_002516.2	5063941	5064777	-	837	protein_coding	hypothetical protein&&-- && PF17113:Regulatory signalling modulator protein AmpE	-	NOT_CHANGE
PA4520	823.11	913.252	854.867	1518.28	1447.72	1136.06	863.743	1367.35	-0.662936	0.000327846	0.00559804	PA4520	NC_002516.2	5061730	5063751	-	2022	protein_coding	chemotaxis transducer&&sp|G3XD24|PCTA_PSEAE Methyl-accepting chemotaxis protein PctA OS=Pseudomonas aeruginosa (strain ATCC 15692 / DSM 22644 / CIP 104116 / JCM 14847 / LMG 12228 / 1C / PRS 101 / PAO1) OX=208964 GN=pctA PE=1 SV=1 && PF00015:Methyl-accepting chemotaxis protein (MCP) signalling domain|PF00672:HAMP domain	HAMP	NOT_CHANGE
PA4519	842.826	1210.5	1146.72	740.646	1121.56	1048.83	1066.68	970.344	0.136638	0.57827	0.762214	speC	NC_002516.2	5060115	5061278	-	1164	protein_coding	ornithine decarboxylase&&sp|P27121|DCOR_NEUCR Ornithine decarboxylase OS=Neurospora crassa (strain ATCC 24698 / 74-OR23-1A / CBS 708.71 / DSM 1257 / FGSC 987) OX=367110 GN=spe-1 PE=2 SV=1 && PF00278:Pyridoxal-dependent decarboxylase, C-terminal sheet domain|PF02784:Pyridoxal-dependent decarboxylase, pyridoxal binding domain	-	NOT_CHANGE
PA4518	216.867	262.047	211.129	132.766	237.472	218.594	230.014	196.278	0.229609	0.400689	0.625194	PA4518	NC_002516.2	5059574	5059999	-	426	protein_coding	hypothetical protein&&-- && PF00903:Glyoxalase/Bleomycin resistance protein/Dioxygenase superfamily	Glyoxalase	NOT_CHANGE
PA4517	135.049	179.913	215.269	121.386	218.398	195.473	176.744	178.419	-0.013599	0.964013	0.982777	PA4517	NC_002516.2	5057716	5059518	+	1803	protein_coding	hypothetical protein&&sp|P0CB40|EPTC_ECOLX Phosphoethanolamine transferase EptC OS=Escherichia coli OX=562 GN=eptC PE=1 SV=1 && PF00884:Sulfatase|PF08019:Phosphoethanolamine transferase EptA/EptB	Sulfatase	NOT_CHANGE
PA4516	65.0602	60.6227	76.5862	78.7115	56.2685	88.2784	67.423	74.4194	-0.141318	0.613799	0.788135	PA4516	NC_002516.2	5056778	5057593	+	816	protein_coding	hypothetical protein&&-- && PF08238:Sel1 repeat	-	NOT_CHANGE
PA4515	80.8324	81.1562	107.635	95.7814	90.6018	98.7877	89.8744	95.057	-0.0817642	0.732405	0.866322	PA4515	NC_002516.2	5056095	5056775	+	681	protein_coding	hydroxylase&&sp|Q9HVQ7|PIUC_PSEAE PKHD-type hydroxylase PiuC OS=Pseudomonas aeruginosa (strain ATCC 15692 / DSM 22644 / CIP 104116 / JCM 14847 / LMG 12228 / 1C / PRS 101 / PAO1) OX=208964 GN=piuC PE=3 SV=1 && PF13640:2OG-Fe(II) oxygenase superfamily|PF18331:PKHD-type hydroxylase C-terminal domain	-	NOT_CHANGE
PA4514	280.942	868.274	981.131	220.961	311.861	402.507	710.115	311.776	1.18779	0.00674535	0.0513155	PA4514	NC_002516.2	5053616	5055877	-	2262	protein_coding	iron transport outer membrane receptor&&sp|P81549|BFRD_BORPE Probable TonB-dependent receptor BfrD OS=Bordetella pertussis (strain Tohama I / ATCC BAA-589 / NCTC 13251) OX=257313 GN=bfrD PE=1 SV=2 && PF07715:TonB-dependent Receptor Plug Domain|PF00593:TonB dependent receptor	TonB_dep_Rec	NOT_CHANGE
PA4513	66.046	155.468	187.326	68.2798	98.2315	112.45	136.28	92.987	0.551897	0.166618	0.379709	PA4513	NC_002516.2	5050848	5053400	-	2553	protein_coding	oxidoreductase&&sp|Q8EAZ9|CYSJ_SHEON Sulfite reductase [NADPH] flavoprotein alpha-component OS=Shewanella oneidensis (strain MR-1) OX=211586 GN=cysJ PE=3 SV=1 && PF00258:Flavodoxin|PF00175:Oxidoreductase NAD-binding domain|PF03929:PepSY-associated TM region	NAD_binding_1	NOT_CHANGE
PA4512	723.549	602.316	586.816	528.22	524.537	530.721	637.56	527.826	0.272649	0.107047	0.289947	lpxO1	NC_002516.2	5049769	5050668	+	900	protein_coding	lipopolysaccharide biosynthetic protein LpxO&&-- && PF05118:Aspartyl/Asparaginyl beta-hydroxylase	-	NOT_CHANGE
PA4511	673.275	534.849	613.724	642.02	608.463	514.957	607.283	588.48	0.0449248	0.811214	0.90815	PA4511	NC_002516.2	5048884	5049639	-	756	protein_coding	hypothetical protein&&sp|Q9HVR0|PXPA3_PSEAE 5-oxoprolinase subunit A 3 OS=Pseudomonas aeruginosa (strain ATCC 15692 / DSM 22644 / CIP 104116 / JCM 14847 / LMG 12228 / 1C / PRS 101 / PAO1) OX=208964 GN=pxpA3 PE=1 SV=1 && PF03746:LamB/YcsF family	-	NOT_CHANGE
PA4510	278.97	241.513	254.597	188.718	164.037	182.862	258.36	178.539	0.533371	0.00409721	0.0365262	PA4510	NC_002516.2	5048210	5048887	-	678	protein_coding	hypothetical protein&&-- && PF02682:Carboxyltransferase domain, subdomain C and D	-	NOT_CHANGE
PA4509	171.522	134.934	145.928	104.316	117.306	92.4821	150.795	104.701	0.525015	0.0196529	0.103629	PA4509	NC_002516.2	5047284	5048213	-	930	protein_coding	hypothetical protein&&sp|P75745|PXPC_ECOLI 5-oxoprolinase subunit C OS=Escherichia coli (strain K12) OX=83333 GN=pxpC PE=1 SV=1 && PF02626:Carboxyltransferase domain, subdomain A and B	-	NOT_CHANGE
PA4508	55.2026	69.4228	99.355	63.5382	78.2037	62.005	74.6601	67.9156	0.134104	0.658727	0.818077	PA4508	NC_002516.2	5046806	5047279	+	474	protein_coding	transcriptional regulator&&sp|P0ACJ2|LRP_ECO57 Leucine-responsive regulatory protein OS=Escherichia coli O157:H7 OX=83334 GN=lrp PE=3 SV=2 && PF01037:Lrp/AsnC ligand binding domain|PF13412:Winged helix-turn-helix DNA-binding	AsnC_trans_reg	NOT_CHANGE
PA4507	189.266	185.779	219.409	185.873	153.546	148.182	198.151	162.534	0.284522	0.168121	0.381347	PA4507	NC_002516.2	5046032	5046664	-	633	protein_coding	hypothetical protein&&sp|P38102|Y4757_PSEAE Uncharacterized membrane protein PA4757 OS=Pseudomonas aeruginosa (strain ATCC 15692 / DSM 22644 / CIP 104116 / JCM 14847 / LMG 12228 / 1C / PRS 101 / PAO1) OX=208964 GN=PA4757 PE=3 SV=2 && PF01810:LysE type translocator	-	NOT_CHANGE
PA4506	863.527	607.205	600.27	860.136	601.787	789.25	690.334	750.391	-0.120195	0.619332	0.792274	PA4506	NC_002516.2	5045028	5045999	+	972	protein_coding	peptide ABC transporter ATP-binding protein&&sp|A0A0H2ZH52|DPPF_PSEAB Di/tripeptide transport ATP-binding protein DppF OS=Pseudomonas aeruginosa (strain UCBPP-PA14) OX=208963 GN=dppF PE=1 SV=1 && PF00005:ABC transporter|PF08352:Oligopeptide/dipeptide transporter, C-terminal region	ABC_tran	NOT_CHANGE
PA4505	634.83	500.626	450.202	724.525	526.444	686.259	528.553	645.743	-0.288634	0.202531	0.426929	PA4505	NC_002516.2	5044054	5045028	+	975	protein_coding	ABC transporter ATP-binding protein&&sp|A0A0H2ZGN6|DPPD_PSEAB Di/tripeptide transport ATP-binding protein DppD OS=Pseudomonas aeruginosa (strain UCBPP-PA14) OX=208963 GN=dppD PE=1 SV=1 && PF08352:Oligopeptide/dipeptide transporter, C-terminal region|PF00005:ABC transporter	ABC_tran	NOT_CHANGE
[truncated: 4,573 more rows]
